# Supplementary material
Source: PubMed Central journal article supplement (PMC2756031)
Supplement: NIHMS138678-supplement-1.pdf [file NIHMS138678-supplement-1.pdf]

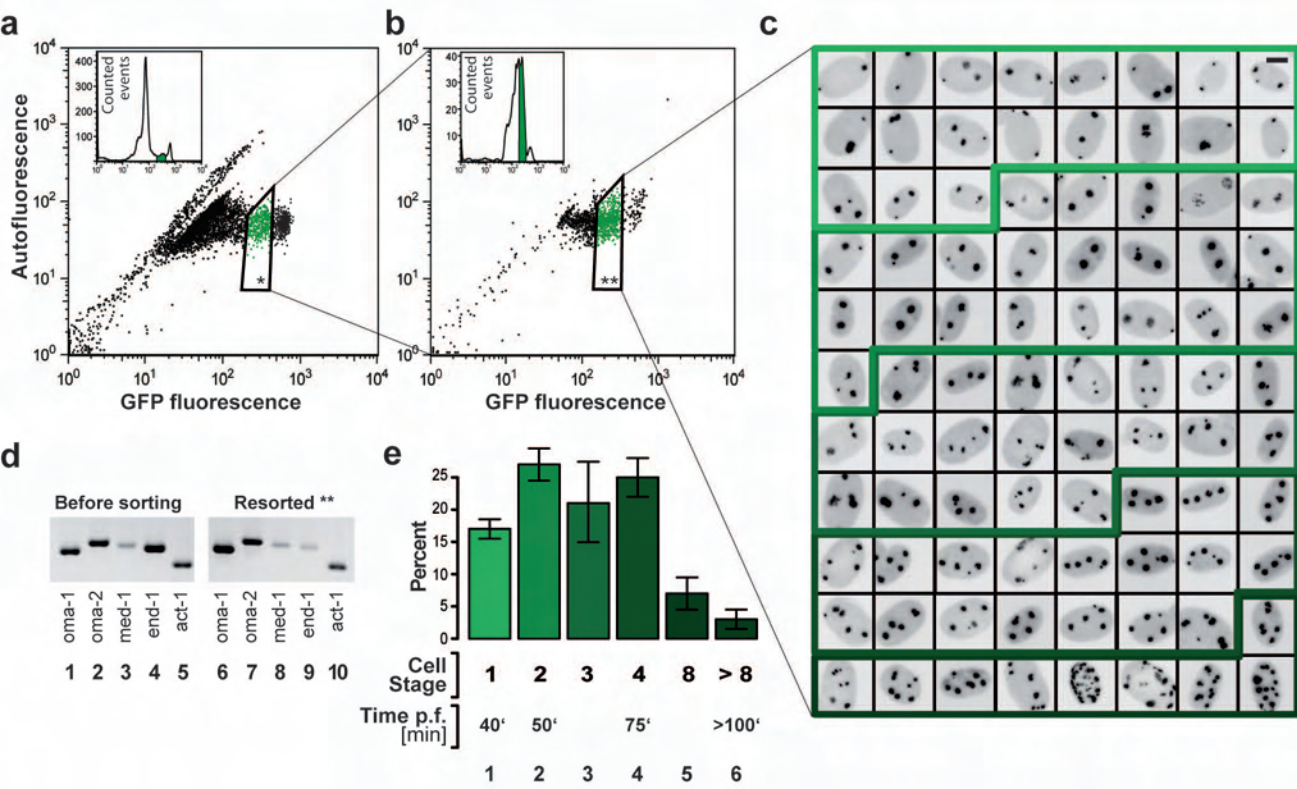

**Supplementary Figure 1.** eFACS of two-to-four-cell stage embryos.

(a) A mixed population of embryos from the OMA-1::GFP strain is passed through a Fluorescent Activated Cell Sorter (FACS). Scatter plot depicts GFP fluorescent signal versus a second fluorescence channel used for autofluorescence detection. We attempted to sort two-cell stage embryos by selecting a less GFP fluorescent population of embryos (single asterisk (\*), ~5-10% of the initial population). (b) This population can also be highly enriched by resorting (double asterisk (\*\*)) but represents a mixture of two-four-cell stage embryos as observed by microscopic examination (panel c). (c), Characterization of the resorted embryos by fluorescence microscopy of a representative FACS run. DAPI stained pronuclei appear black. Scale bar, 25µm. (d), RT-PCR analysis of a mixed non-sorted embryo population (lanes 1-5) compared to the resorted two-four-cell stage embryos sample (\*\*) (lanes 6-10). In resorted embryos (\*\*) the early zygotic (four-to-eight-cell stage) transcribed genes *med-1* and *end-1* (lanes 8-9) and one-cell stage specific marker genes *oma-1* and *oma-2* (lanes 6-7) are amplified. Compared to mixed embryos *med-1* is less abundant in the resorted two-to-four-cell stage embryo sample (*act-1*, RT-PCR control). (e), microscopic validation of the resorted embryos. The resorted population yields a sample with around 70% two-to-four-cell stage embryos (lanes 2-4) contaminated with around 15% of one-cell stage embryos (lane 1) and lesser amounts of eight-cell stage or older embryos (lanes 5-6). (Error bars, s.d., n=4; 100 embryos counted per replicate)

Supplementary Figure 2

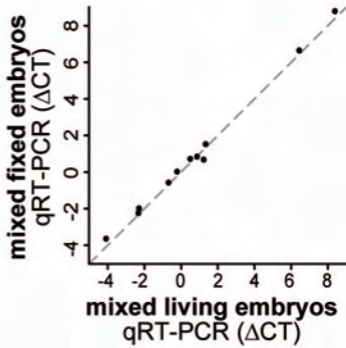

**Supplementary Figure 2.** Comparison of miRNA expression in fixed and living mixed embryos.

Quantitative RT-PCR analysis of 10 miRNAs and one snRNA in fixed and non-fixed embryos shows that fixation does not alter miRNA expression. The plot depicts delta CT values for 11 miRNAs relative to snoRNA U18.

## Transition from 1-cell stage to post-gastrulation

## Sequencing Fold Changes

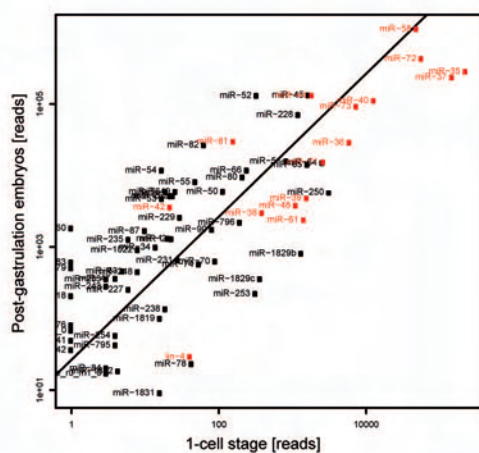

## qRT-PCRs

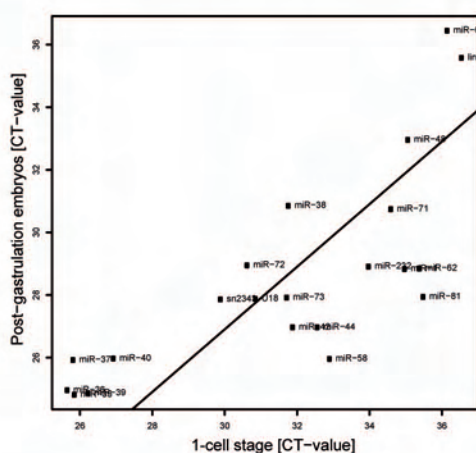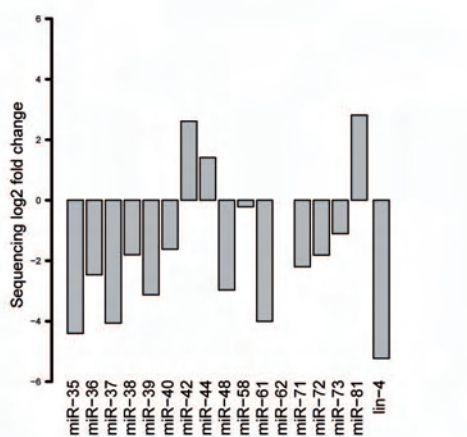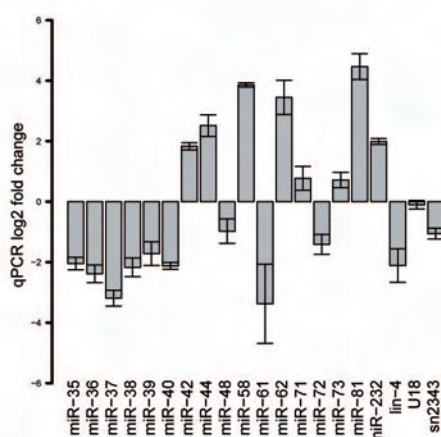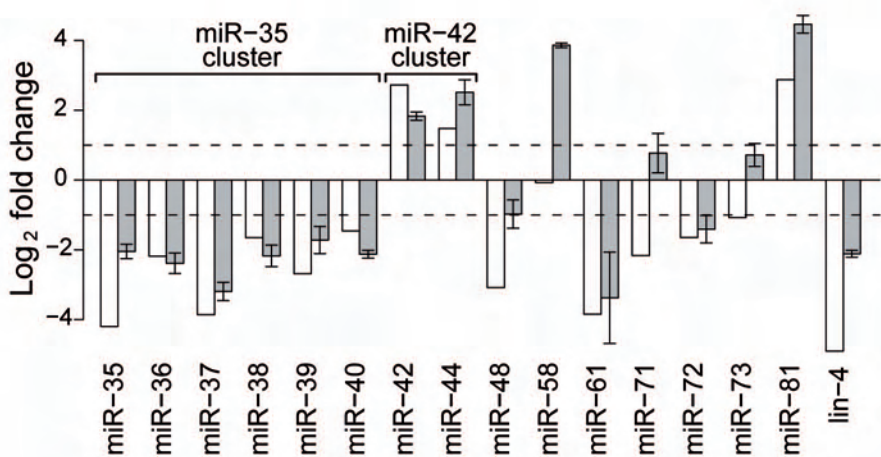

----- 2 fold change

□ Sequencing fold changes

■ qPCR fold changes  
(hand-picked embryos)

**Supplementary Figure 3.** Validation of 16 miRNA fold changes computed from the deep sequencing data by qRT-PCRs on hand-picked living embryos. The figure depicts fold changes in qRT-PCRs (relative to U18) and deep sequencing (logistic model, see Methods and Fig. 4).

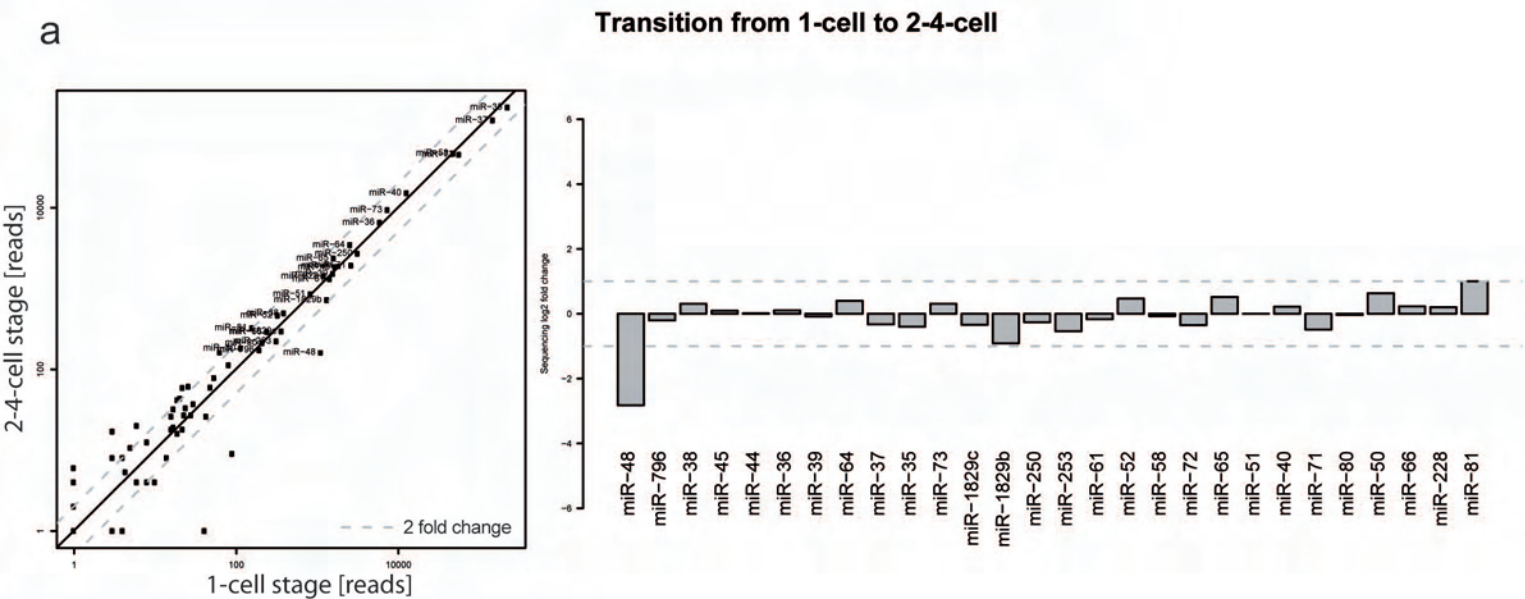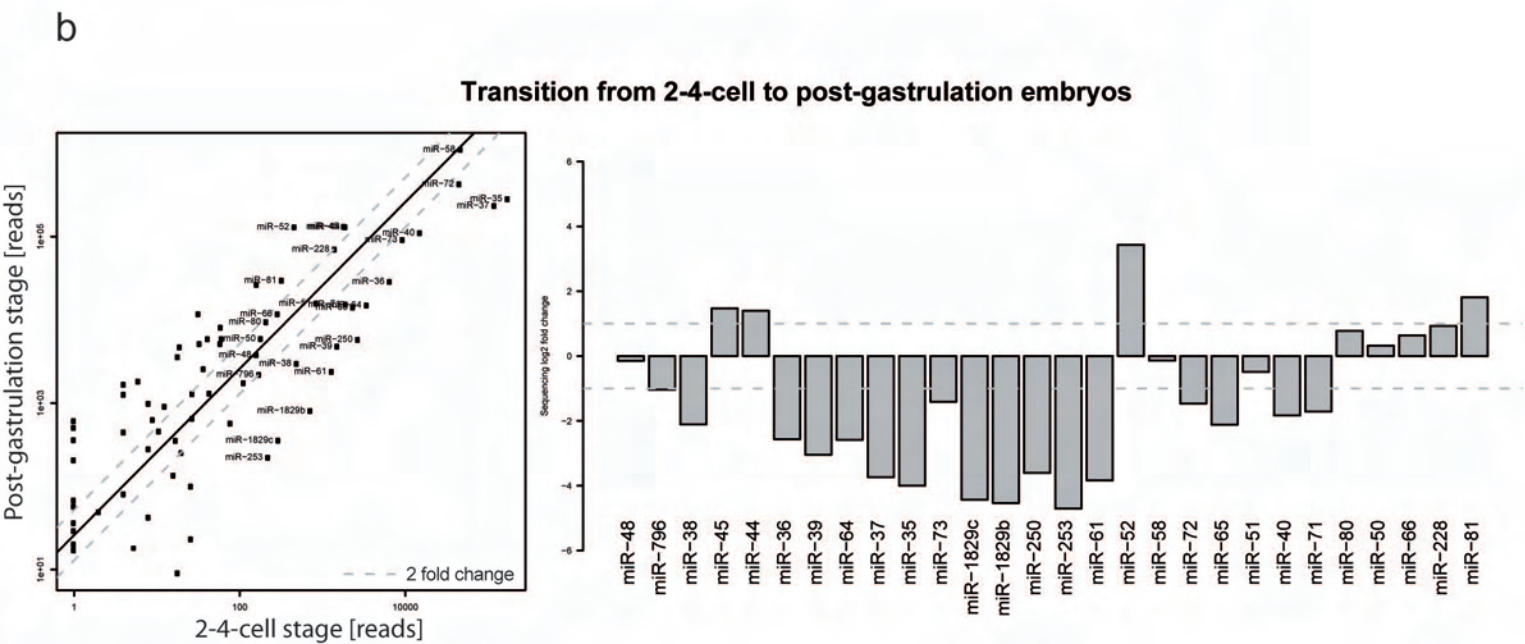

**Supplementary Figure 4.** miRNA expression fold changes between the different samples.

We computed miRNA expression fold changes from the deep sequencing data between our one-cell, two-to-four-cell, and post-gastrulation samples. The doubly logarithmic scatter plots display the number of normalized sequencing reads in the different samples. The grey line represents two fold-changes. The bar plots depict the fold changes for a set of 28 miRNAs that have a high net fold-change between all assayed samples. **(a)** Transition from one-cell to two-to-four-cell stage. Overall, the least amount of change is visible across the first cell divisions. However, miR-48 seems to decrease more than 5-fold from the one-cell to the two-to-four cell embryo. **(b)** Transition from two-to-four-cell to post-gastrulation stage embryos. More widespread and largest changes in miRNA expression are observed at this transition. Also a number of miRNAs are for the first time found to be highly expressed.



**Supplementary Table 1.** Sequencing and mapping results in the samples. Base called reads gives the number of reads produced by the base calling software, including low-quality reads with multiple unidentified nucleotides. Total mapped reads refers to reads with a locus in the genome within edit distance 2 of the sequenced transcript. We found the post-gastrulation sample to be contaminated with presumptively human material. Thus we mapped all samples both against the worm and the human genome using the pipeline described in the Methods section, and retained only reads mapping superiorly to the worm genome. Reads after contamination filtering are those that map to the worm genome with a lower edit distance. Removal of the human contamination did not change any of the conclusions.

|                                                | <b>1-cell stage<br/>(fixed resorted)</b> | <b>1-cell stage<br/>(living sorted)</b> | <b>2-4-cell stage<br/>(fixed resorted)</b> | <b>Older embryo<br/>(sorted)</b> | <b>Post-<br/>gastrulation</b> | <b>Mixed<br/>embryos</b> |
|------------------------------------------------|------------------------------------------|-----------------------------------------|--------------------------------------------|----------------------------------|-------------------------------|--------------------------|
| <b>Base called reads</b>                       | 3742851                                  | 3101329                                 | 1918882                                    | 6080679                          | 12330674                      | 2312231                  |
| <b>Total mapped reads</b>                      | 1547554                                  | 1416448                                 | 974654                                     | 4529684                          | 5040373                       | 1707757                  |
| <b>Reads after<br/>contamination filtering</b> | 1509590                                  | 1067503                                 | 964873                                     | 4013182                          | 3213177                       | 1500137                  |

**Supplementary Table 2.** miRNA predictions using miRDeep.

The table depicts 19 predicted miRNAs from our datasets including star and precursor sequences.

**miRNA candidates**

| novel miRNA     | mature sequence          | star sequence            |
|-----------------|--------------------------|--------------------------|
| chrI_1628_1     | AUCUACAAUUUUCGCACUUACAG  | GUAAGUGGUUUUUGUAGAUCA    |
| chrI_6704_3     | UUCGAAUUUUUCUGUAGAUCAAA  | UGAUCUACCAGAAUUGUGGGAAUU |
| chrI_7174_4     | GAAAAAUUGC GCGCAUGGGUUG  | ACCCUUUCGCCAAUUUUUUUCGU  |
| chrII_10624     | CUCGUAAAAUAUGGUGUAUGGAC  | CAAUACACCAGAUUUGACGCGCA  |
| chrII_11035_6   | AAA AUGUGCCUAAA UUAGCGAA | CGUUGAUUUAGGCCACAAUUUGA  |
| chrII_11510_7   | AGAAUCGUAGCGCGUGUUGUUUA  | AACAGCACGUGUACGAUGCUC    |
| chrII_13808_9   | UGGGCGGAGCGAAUUGAUGAU    | CAGCGAUUCGCCCUCCCGUU     |
| chrII_14421_10  | AGUGCAAACUGUCGUAAGAUCUG  | GAUUUUACGACAAAUUGCACAAA  |
| chrII_8551_12   | AGAGUGGGCAGUCGGUGUCGACCU | GUCGACCCUUGUGCCUGUUUCGG  |
| chrIII_15426_14 | UUCAUAUACCGGAUGGUCUGG    | AGACUAUCUAGGAAUAUUGAACU  |
| chrIII_15586_15 | GUGGUCGACGCAUGUAUACA     | UAUACGGAUCAAUAC          |
| chrIII_16200_16 | AAGCUGUAAGAGGACUGCCUAA   | UGGCGGACUCUUCACAGUUUGA   |
| chrIII_18251_18 | UGACAUCUGACAGGUUUGUUUU   | AACAGACCCGCCUGAUGUCAGC   |
| chrIV_21546_19  | AUGCAGUUUCUGGUAUACUUA    | AAGUGUACCCGAAUCUGAUAUCC  |
| chrIV_21548_20  | AUGCAGAUUUUGGUACACUUA    | AAGUGUACCCGGAUCUGAUAUCC  |
| chrIV_21554_21  | AAAAGACCACCGGUUACACUACA  | GAGUGUAACCGCACGUCUUGUUU  |
| chrIV_29258_23  | UCGACCCUUGUGCCUGUUUCGGU  | CAGAGUGGGCAGUCGGUGUCGAUC |
| chrX_36996_25   | AACGGCGGCAUUUUGUUUACA    | UAAGCAAUUC CCGUCAUUUUC   |
| chrX_38281      | UGGCAGAUCAUAGGCUGACUUUG  | AAGUGGCAUUUGAUUAAGCCAUC  |

precursor sequence

GUAAGUGGUUUUUGUAGAUCAAAAUAGUUAAGAAUUUUUUGAUCUACAAUUUUCGCACUUACAG  
UGAUCUACCAGAAUUGUGGGAAUUUAGAUGACAUCACAUUUUUCUGAAUUAAAAUUCGAAUUUUUCUG  
ACCCUUUCGCCAAUUUUUUUCGUGAAAAACGUGUAAUUUUACGAAAAAUUGCGCGCAUGGGUUG  
CAAUACACCAGAUUUGACGCGCAAAUUGUGGGAAUUUUGCUCGUAAAAUAUGGUGUAUGGAC  
CGUUGAUUUAGGCCACAAUUUGAGCCGACAGGCAUUAAAAUUGCUCAAAAUUGUGCCUAAAAUAGCGAA  
AACAGCACGUGUUACGAUGCUCCGUUAGUUCGGAGUUUUUACGGAGAAUCGUAGCGCGUGUUGUUUA  
CAGCGAUUCGCCCCUCCCGUUUUCGCACCAAUACAGUCGUGUCAAAGACACUGAUUGGUUAAAAAGUGC  
AGUGCAAACUGUCGUAAGAUCUGGUGUCAAGUAAGACAGCGCCAGAUUUUACGACAAAUUGCACAAA  
AGAGUGGGCAGUCGGUGUCGACCUACAUCAUUCGCAGGUCGACCCUUGUGCCUGUUUCGG  
AGACUAUCUAGGAAAUUAUGAACUAAUACAAUUUUUAGUUCAAUUAUACCGGAUUGGUCUGG  
UAUACGGAUCAAUACGGCUCUCAUCGAUUGAACCGGCAAGUUUAUCCAAGAUUCUGAAGAGACAUCGU  
UGGCGGACUCUUCACAGUUUGACCUCGGAGAUCAAGCUGUAAGAGGACUGCCUAA  
UGACAUCUGACAGGUUUUGUUUUGAGCCGAUUUUCUAAAAUACCUUGGGUGUUUCAAAACAGACCCGCC  
AAGUGUACCCGAAUCUGAUAUCCUAUCAUCUGAAAAAGGAUGCAGUUUCUGGUUAUACUUA  
AAGUGUACCCGGAUCUGAUAUCCUAUCACCAAAAAAGAGGAUGCAGAUUUUGGUACACUUA  
GAGUGUAACCGCACGUCUUGUUUCAAAACUCAAUUAUUGGAAAAAGACCACCGGUACACUACA  
CAGAGUGGGCAGUCGGUGUCGAUCUACAUCAUUCGCAGGUCGACCCUUGUGCCUGUUUCGGU  
UAAGCAAUUCGCGUCAUUUUCUGGAAAUUUUUGAAACGGCGGCAAUUUGUUUACA  
UGGCAGAUCAUAGGCUGACUUUGCAAGCAUUUUUAUACAAAGUGGCAUUUGAUAGCCAUC

| precursor structure                                                | mfe    | randfold p-value |
|--------------------------------------------------------------------|--------|------------------|
| (((((.....((((((((((((((((((((.....))))))))))))))))))....))))))))) | -24.2  | 0.001            |
| (((((.....((((((((((((((((((((.....))))))))))))))))))....))))))))) | -23.5  | 0.001            |
| (((((.....((((((((((((((((((((.....))))))))))))))))))....))))))))) | -20.3  | 0.003            |
| (((((.....((((((((((((((((((((.....))))))))))))))))))....))))))))) | -24    | 0.001            |
| (((((.....((((((((((((((((((((.....))))))))))))))))))....))))))))) | -28.33 | 0.001            |
| (((((.....((((((((((((((((((((.....))))))))))))))))))....))))))))) | -36.16 | 0.001            |
| (((((.....((((((((((((((((((((.....))))))))))))))))))....))))))))) | -37.7  | 0.001            |
| (((((.....((((((((((((((((((((.....))))))))))))))))))....))))))))) | -36.4  | 0.001            |
| (((((.....((((((((((((((((((((.....))))))))))))))))))....))))))))) | -25.3  | 0.014            |
| (((((.....((((((((((((((((((((.....))))))))))))))))))....))))))))) | -25.1  | 0.001            |
| (((((.....((((((((((((((((((((.....))))))))))))))))))....))))))))) | -19.6  | 0.282            |
| (((((.....((((((((((((((((((((.....))))))))))))))))))....))))))))) | -25.3  | 0.001            |
| (((((.....((((((((((((((((((((.....))))))))))))))))))....))))))))) | -27.21 | 0.002            |
| (((((.....((((((((((((((((((((.....))))))))))))))))))....))))))))) | -23.2  | 0.001            |
| (((((.....((((((((((((((((((((.....))))))))))))))))))....))))))))) | -27.1  | 0.001            |
| (((((.....((((((((((((((((((((.....))))))))))))))))))....))))))))) | -22.6  | 0.001            |
| (((((.....((((((((((((((((((((.....))))))))))))))))))....))))))))) | -23.2  | 0.026            |
| (((((.....((((((((((((((((((((.....))))))))))))))))))....))))))))) | -16.8  | 0.003            |
| (((((.....((((((((((((((((((((.....))))))))))))))))))....))))))))) | -17.82 | 0.013            |

| mature read count | star strand | conserved seed | seed information |
|-------------------|-------------|----------------|------------------|
| 247               | yes         | no             |                  |
| 28                | yes         | no             |                  |
| 186               | yes         | no             |                  |
| 6                 | yes         | no             |                  |
| 10                | yes         | no             |                  |
| 108               | yes         | no             |                  |
| 24                | no          | yes            | cel-miR-1832     |
| 24                | no          | no             |                  |
| 32                | yes         | no             |                  |
| 112               | yes         | no             |                  |
| 27                | yes         | no             |                  |
| 54                | yes         | no             |                  |
| 16                | yes         | no             |                  |
| 11                | yes         | no             |                  |
| 99                | yes         | no             |                  |
| 31                | yes         | no             |                  |
| 14                | yes         | no             |                  |
| 20                | yes         | no             |                  |
| 25                | no          | yes            | cel-miR-72       |

genomic location (UCSC genome browser)  
mirtron  
some conservation, DNA repeat  
intron  
intron, sense  
intron, sense  
intergenic  
intron, antisense  
intron, antisense, some conservation  
intergenic  
coding exon, sense  
pseudogene, antisense  
possible intron of eIF-4a, sense  
intron, sense  
clusters with chrIV\_21548, chrIV\_21554  
clusters with chrIV\_21546, chrIV\_21554  
clusters with chrIV\_21546, chrIV\_21548  
intron, antisense  
mirtron  
local conservation



**Supplementary Table 3.** Top 100 reads mapping antisense to coding features. Short (~22 nt) and long (~26 nt) reads mapping antisense to coding features in the genome in the fixed-sorted one-cell stage embryo sample.

## 1-cell stage embryo

|                | <b>short antisense<br/>[~22nt] mapping<br/>reads</b> |                | <b>long antisense<br/>[~26nt]<br/>mapping reads</b> |
|----------------|------------------------------------------------------|----------------|-----------------------------------------------------|
| WBGene00044258 | 503.5                                                | WBGene00044258 | 1155.6                                              |
| WBGene00020146 | 400.6                                                | WBGene00045382 | 717.0                                               |
| WBGene00001976 | 264.1                                                | WBGene00010507 | 345.0                                               |
| WBGene00019327 | 194.4                                                | WBGene00045410 | 144.0                                               |
| WBGene00009788 | 185.8                                                | WBGene00018688 | 127.0                                               |
| WBGene00011049 | 124.0                                                | WBGene00020817 | 79.0                                                |
| WBGene00012040 | 122.0                                                | WBGene00022730 | 76.4                                                |
| WBGene00008086 | 117.6                                                | WBGene00010402 | 69.0                                                |
| WBGene00012229 | 114.0                                                | WBGene00044559 | 62.1                                                |
| WBGene00008517 | 110.7                                                | WBGene00012290 | 59.8                                                |
| WBGene00007125 | 106.0                                                | WBGene00021018 | 52.4                                                |
| WBGene00011737 | 100.7                                                | WBGene00016993 | 47.6                                                |
| WBGene00021606 | 98.9                                                 | WBGene00021375 | 39.3                                                |
| WBGene00016885 | 97.1                                                 | WBGene00018199 | 30.0                                                |
| WBGene00044436 | 95.0                                                 | WBGene00008447 | 29.0                                                |
| WBGene00007133 | 93.0                                                 | WBGene00018712 | 15.5                                                |
| WBGene00013507 | 92.3                                                 | WBGene00022352 | 15.0                                                |
| WBGene00011964 | 91.0                                                 | WBGene00013638 | 11.7                                                |
| WBGene00009511 | 87.3                                                 | WBGene00017941 | 11.0                                                |
| WBGene00017405 | 85.0                                                 | WBGene00013779 | 10.0                                                |
| WBGene00022129 | 75.1                                                 | WBGene00022731 | 8.2                                                 |
| WBGene00003903 | 74.0                                                 | WBGene00044167 | 7.5                                                 |
| WBGene00020133 | 74.0                                                 | WBGene00044478 | 7.5                                                 |
| WBGene00013635 | 72.3                                                 | WBGene00020537 | 7.0                                                 |
| WBGene00013685 | 71.2                                                 | WBGene00007960 | 7.0                                                 |
| WBGene00012792 | 71.0                                                 | WBGene00021019 | 7.0                                                 |
| WBGene00002295 | 65.7                                                 | WBGene00010100 | 6.5                                                 |
| WBGene00001898 | 65.6                                                 | WBGene00000123 | 5.0                                                 |
| WBGene00008622 | 64.0                                                 | WBGene00013816 | 5.0                                                 |
| WBGene00019611 | 59.0                                                 | WBGene00012819 | 5.0                                                 |
| WBGene00022151 | 58.6                                                 | WBGene00020146 | 4.0                                                 |
| WBGene00006902 | 57.0                                                 | WBGene00001976 | 4.0                                                 |
| WBGene00009247 | 56.0                                                 | WBGene00011049 | 4.0                                                 |
| WBGene00009696 | 55.5                                                 | WBGene00009511 | 4.0                                                 |
| WBGene00019735 | 54.8                                                 | WBGene00006529 | 4.0                                                 |
| WBGene00007966 | 52.2                                                 | WBGene00009863 | 4.0                                                 |
| WBGene00010722 | 51.8                                                 | WBGene00018690 | 4.0                                                 |
| WBGene00045382 | 50.0                                                 | WBGene00010963 | 4.0                                                 |
| WBGene00016871 | 49.0                                                 | WBGene00017942 | 3.5                                                 |
| WBGene00013403 | 47.5                                                 | WBGene00022729 | 3.1                                                 |
| WBGene00001433 | 47.4                                                 | WBGene00012229 | 3.0                                                 |
| WBGene00008073 | 47.0                                                 | WBGene00007125 | 3.0                                                 |
| WBGene00016299 | 47.0                                                 | WBGene00044436 | 3.0                                                 |
| WBGene00000801 | 46.0                                                 | WBGene00004374 | 3.0                                                 |
| WBGene00022103 | 45.9                                                 | WBGene00021246 | 3.0                                                 |
| WBGene00013859 | 45.0                                                 | WBGene00000257 | 3.0                                                 |
| WBGene00014041 | 44.7                                                 | WBGene00003915 | 3.0                                                 |
| WBGene00009950 | 44.1                                                 | WBGene00002073 | 3.0                                                 |
| WBGene00004374 | 43.7                                                 | WBGene00009374 | 3.0                                                 |
| WBGene00000915 | 40.3                                                 | WBGene00018204 | 3.0                                                 |
| WBGene00012490 | 40.1                                                 | WBGene00003476 | 3.0                                                 |
| WBGene00012373 | 40.0                                                 | WBGene00012452 | 3.0                                                 |
| WBGene00017423 | 39.8                                                 | WBGene00022339 | 3.0                                                 |

|                |      |                |     |
|----------------|------|----------------|-----|
| WBGene00013221 | 39.6 | WBGene00010550 | 2.6 |
| WBGene00015868 | 39.0 | WBGene00011964 | 2.0 |
| WBGene00021637 | 39.0 | WBGene00013685 | 2.0 |
| WBGene00022512 | 38.0 | WBGene00001898 | 2.0 |
| WBGene00009509 | 37.0 | WBGene00008622 | 2.0 |
| WBGene00022158 | 37.0 | WBGene00016871 | 2.0 |
| WBGene00009089 | 36.0 | WBGene00014041 | 2.0 |
| WBGene00022438 | 36.0 | WBGene00009089 | 2.0 |
| WBGene00011398 | 35.0 | WBGene00002005 | 2.0 |
| WBGene00019511 | 34.0 | WBGene00000140 | 2.0 |
| WBGene00020207 | 33.0 | WBGene00003976 | 2.0 |
| WBGene00007982 | 33.0 | WBGene00000465 | 2.0 |
| WBGene00018390 | 32.6 | WBGene00001829 | 2.0 |
| WBGene00002005 | 32.5 | WBGene00020696 | 2.0 |
| WBGene00012290 | 32.4 | WBGene00007028 | 2.0 |
| WBGene00021976 | 32.0 | WBGene00003410 | 2.0 |
| WBGene00013152 | 31.8 | WBGene00017419 | 2.0 |
| WBGene00004751 | 31.6 | WBGene00007242 | 2.0 |
| WBGene00000140 | 31.2 | WBGene00011884 | 2.0 |
| WBGene00001008 | 31.0 | WBGene00004187 | 2.0 |
| WBGene00022163 | 31.0 | WBGene00021939 | 2.0 |
| WBGene00019381 | 30.5 | WBGene00008183 | 2.0 |
| WBGene00003976 | 30.0 | WBGene00015312 | 2.0 |
| WBGene00012896 | 29.5 | WBGene00018953 | 2.0 |
| WBGene00009926 | 29.1 | WBGene00019133 | 2.0 |
| WBGene00019871 | 29.0 | WBGene00006975 | 2.0 |
| WBGene00018688 | 28.8 | WBGene00004468 | 2.0 |
| WBGene00019517 | 28.5 | WBGene00002152 | 2.0 |
| WBGene00016346 | 28.5 | WBGene00001259 | 2.0 |
| WBGene00021673 | 28.0 | WBGene00008848 | 2.0 |
| WBGene00012623 | 28.0 | WBGene00004798 | 2.0 |
| WBGene00012944 | 28.0 | WBGene00010006 | 2.0 |
| WBGene00044281 | 28.0 | WBGene00004204 | 2.0 |
| WBGene00000443 | 28.0 | WBGene00004110 | 2.0 |
| WBGene00003614 | 27.8 | WBGene00011146 | 2.0 |
| WBGene00021670 | 27.7 | WBGene00004244 | 2.0 |
| WBGene00013554 | 27.5 | WBGene00018856 | 2.0 |
| WBGene00010785 | 27.3 | WBGene00006833 | 2.0 |
| WBGene00000123 | 27.0 | WBGene00010013 | 2.0 |
| WBGene00008862 | 26.5 | WBGene00001224 | 2.0 |
| WBGene00018878 | 26.0 | WBGene00010975 | 2.0 |
| WBGene00019816 | 26.0 | WBGene00021088 | 2.0 |
| WBGene00010351 | 25.8 | WBGene00019971 | 2.0 |
| WBGene00006784 | 25.7 | WBGene00008740 | 2.0 |
| WBGene00020902 | 25.6 | WBGene00007145 | 2.0 |
| WBGene00000912 | 25.5 | WBGene00007186 | 2.0 |
| WBGene00018394 | 25.0 | WBGene00007048 | 2.0 |

**Supplementary Table 4.** Novel 21U-RNAs.

We found 389 novel 21U-RNAs within our datasets, the table lists these and their positions in the genome.

**Novel 21U RNAs**

| Chromosome | Start position | Stop position | Strand |
|------------|----------------|---------------|--------|
| chrI       | 5194768        | 5194788       | -      |
| chrI       | 5560257        | 5560277       | +      |
| chrI       | 7029456        | 7029476       | -      |
| chrI       | 7244797        | 7244817       | +      |
| chrI       | 7425325        | 7425345       | +      |
| chrI       | 7699733        | 7699753       | -      |
| chrI       | 795381         | 795401        | -      |
| chrI       | 8655807        | 8655827       | -      |
| chrI       | 9614840        | 9614861       | +      |
| chrII      | 10308084       | 10308104      | -      |
| chrII      | 11331646       | 11331666      | +      |
| chrII      | 12700050       | 12700070      | -      |
| chrII      | 14715392       | 14715412      | -      |
| chrII      | 14722462       | 14722482      | -      |
| chrII      | 2134236        | 2134256       | -      |
| chrII      | 5011793        | 5011813       | -      |
| chrII      | 5645358        | 5645378       | -      |
| chrII      | 7805734        | 7805754       | +      |
| chrII      | 7981130        | 7981150       | +      |
| chrII      | 8571767        | 8571787       | -      |
| chrII      | 9204899        | 9204919       | +      |
| chrII      | 9459657        | 9459677       | +      |
| chrII      | 9461526        | 9461546       | +      |
| chrII      | 9464411        | 9464431       | +      |
| chrIII     | 13374644       | 13374668      | -      |
| chrIII     | 13700548       | 13700568      | -      |
| chrIII     | 1970238        | 1970258       | +      |
| chrIII     | 4725319        | 4725339       | +      |
| chrIII     | 6546448        | 6546470       | +      |
| chrIII     | 6951332        | 6951352       | +      |
| chrIII     | 964640         | 964660        | +      |
| chrIV      | 10315849       | 10315869      | -      |
| chrIV      | 10435191       | 10435211      | -      |
| chrIV      | 10448837       | 10448857      | +      |
| chrIV      | 1047670        | 1047690       | +      |
| chrIV      | 10510266       | 10510286      | -      |
| chrIV      | 10539309       | 10539329      | +      |
| chrIV      | 10999225       | 10999245      | +      |
| chrIV      | 11153199       | 11153219      | -      |
| chrIV      | 11189741       | 11189761      | -      |
| chrIV      | 11247956       | 11247976      | -      |
| chrIV      | 11279544       | 11279564      | +      |
| chrIV      | 12037807       | 12037827      | +      |
| chrIV      | 12038284       | 12038304      | -      |
| chrIV      | 12554479       | 12554499      | +      |
| chrIV      | 12554823       | 12554843      | +      |
| chrIV      | 12555066       | 12555086      | +      |
| chrIV      | 13051677       | 13051697      | -      |
| chrIV      | 13617813       | 13617833      | -      |

|       |          |            |
|-------|----------|------------|
| chrIV | 13618634 | 13618654 - |
| chrIV | 13651725 | 13651745 + |
| chrIV | 13662884 | 13662904 + |
| chrIV | 13688687 | 13688707 - |
| chrIV | 13799710 | 13799730 + |
| chrIV | 13823358 | 13823378 + |
| chrIV | 13836660 | 13836680 + |
| chrIV | 13902527 | 13902547 - |
| chrIV | 14009455 | 14009475 + |
| chrIV | 14034960 | 14034980 - |
| chrIV | 14038471 | 14038491 + |
| chrIV | 14054824 | 14054844 - |
| chrIV | 14057131 | 14057151 + |
| chrIV | 14093642 | 14093662 - |
| chrIV | 14100592 | 14100612 - |
| chrIV | 14308273 | 14308293 + |
| chrIV | 14308590 | 14308610 + |
| chrIV | 14329937 | 14329957 - |
| chrIV | 14347826 | 14347846 - |
| chrIV | 14351778 | 14351800 - |
| chrIV | 14379709 | 14379729 - |
| chrIV | 14419573 | 14419593 + |
| chrIV | 14474256 | 14474276 - |
| chrIV | 14501374 | 14501394 - |
| chrIV | 14560724 | 14560744 + |
| chrIV | 14564711 | 14564731 + |
| chrIV | 14580555 | 14580575 + |
| chrIV | 14602112 | 14602132 + |
| chrIV | 14633511 | 14633531 - |
| chrIV | 14659896 | 14659916 - |
| chrIV | 14684113 | 14684133 + |
| chrIV | 14684647 | 14684667 + |
| chrIV | 14686332 | 14686352 + |
| chrIV | 14713872 | 14713892 - |
| chrIV | 14719529 | 14719549 - |
| chrIV | 14720589 | 14720609 - |
| chrIV | 14741983 | 14742003 - |
| chrIV | 14787043 | 14787063 - |
| chrIV | 14890201 | 14890221 + |
| chrIV | 14898321 | 14898341 - |
| chrIV | 14908100 | 14908120 + |
| chrIV | 14934481 | 14934501 - |
| chrIV | 14944503 | 14944523 - |
| chrIV | 14945431 | 14945452 - |
| chrIV | 14966766 | 14966786 + |
| chrIV | 14983271 | 14983291 - |
| chrIV | 14992711 | 14992731 + |
| chrIV | 15066481 | 15066501 - |
| chrIV | 15156805 | 15156825 - |
| chrIV | 15156901 | 15156926 - |
| chrIV | 15156998 | 15157018 - |
| chrIV | 15157269 | 15157289 - |

|       |          |            |
|-------|----------|------------|
| chrIV | 15158010 | 15158030 - |
| chrIV | 15158587 | 15158607 - |
| chrIV | 15159272 | 15159292 - |
| chrIV | 15160772 | 15160792 + |
| chrIV | 15161456 | 15161476 + |
| chrIV | 15162033 | 15162053 + |
| chrIV | 15162775 | 15162795 + |
| chrIV | 15163045 | 15163065 + |
| chrIV | 15163137 | 15163157 + |
| chrIV | 15163241 | 15163261 + |
| chrIV | 15173198 | 15173218 + |
| chrIV | 15193725 | 15193746 - |
| chrIV | 15193869 | 15193889 - |
| chrIV | 15210064 | 15210084 + |
| chrIV | 15219946 | 15219966 + |
| chrIV | 15221304 | 15221324 + |
| chrIV | 15222580 | 15222600 + |
| chrIV | 15222724 | 15222744 + |
| chrIV | 15222812 | 15222832 - |
| chrIV | 15223808 | 15223828 + |
| chrIV | 15224150 | 15224170 + |
| chrIV | 15224238 | 15224258 - |
| chrIV | 15224382 | 15224402 - |
| chrIV | 15225658 | 15225678 - |
| chrIV | 15311914 | 15311934 - |
| chrIV | 15324658 | 15324680 + |
| chrIV | 15327322 | 15327344 - |
| chrIV | 15339051 | 15339071 - |
| chrIV | 15352383 | 15352403 + |
| chrIV | 15352722 | 15352742 - |
| chrIV | 15353259 | 15353279 - |
| chrIV | 15353688 | 15353708 + |
| chrIV | 15354027 | 15354047 - |
| chrIV | 15354564 | 15354584 - |
| chrIV | 15381265 | 15381285 + |
| chrIV | 15389055 | 15389075 - |
| chrIV | 15404680 | 15404700 + |
| chrIV | 15415929 | 15415949 - |
| chrIV | 15416819 | 15416839 + |
| chrIV | 15417169 | 15417189 + |
| chrIV | 15417481 | 15417501 + |
| chrIV | 15417918 | 15417938 + |
| chrIV | 15418811 | 15418831 + |
| chrIV | 15419011 | 15419031 - |
| chrIV | 15419520 | 15419540 - |
| chrIV | 15419675 | 15419700 - |
| chrIV | 15419829 | 15419849 + |
| chrIV | 15420811 | 15420831 - |
| chrIV | 15420960 | 15420980 + |
| chrIV | 15421120 | 15421140 + |
| chrIV | 15421629 | 15421649 + |
| chrIV | 15421829 | 15421849 - |

|       |          |            |
|-------|----------|------------|
| chrIV | 15422722 | 15422742 - |
| chrIV | 15423159 | 15423179 - |
| chrIV | 15423471 | 15423491 - |
| chrIV | 15423821 | 15423841 - |
| chrIV | 15424711 | 15424731 + |
| chrIV | 15425156 | 15425176 + |
| chrIV | 15429644 | 15429664 + |
| chrIV | 15432450 | 15432470 + |
| chrIV | 15436736 | 15436756 - |
| chrIV | 15437933 | 15437953 + |
| chrIV | 15438200 | 15438220 + |
| chrIV | 15439102 | 15439122 - |
| chrIV | 15481071 | 15481091 + |
| chrIV | 15482099 | 15482119 - |
| chrIV | 15484085 | 15484105 + |
| chrIV | 15585010 | 15585030 + |
| chrIV | 15596877 | 15596897 - |
| chrIV | 15605713 | 15605733 + |
| chrIV | 15607443 | 15607463 + |
| chrIV | 15608719 | 15608739 + |
| chrIV | 15608885 | 15608905 - |
| chrIV | 15611682 | 15611702 - |
| chrIV | 15667922 | 15667942 + |
| chrIV | 15669796 | 15669816 + |
| chrIV | 15671506 | 15671526 + |
| chrIV | 15671795 | 15671815 - |
| chrIV | 15676848 | 15676868 + |
| chrIV | 15677125 | 15677145 - |
| chrIV | 15677866 | 15677886 + |
| chrIV | 15678149 | 15678169 - |
| chrIV | 15678528 | 15678548 - |
| chrIV | 15690240 | 15690260 + |
| chrIV | 15706279 | 15706299 - |
| chrIV | 15733769 | 15733789 + |
| chrIV | 15733967 | 15733987 - |
| chrIV | 15734961 | 15734981 - |
| chrIV | 15736080 | 15736100 - |
| chrIV | 15736925 | 15736945 - |
| chrIV | 15737104 | 15737124 - |
| chrIV | 15738316 | 15738336 - |
| chrIV | 15738834 | 15738854 + |
| chrIV | 15739032 | 15739052 - |
| chrIV | 15740691 | 15740711 + |
| chrIV | 15740888 | 15740909 - |
| chrIV | 15741410 | 15741430 + |
| chrIV | 15742619 | 15742639 + |
| chrIV | 15742798 | 15742818 + |
| chrIV | 15743643 | 15743663 + |
| chrIV | 15744762 | 15744782 + |
| chrIV | 15754550 | 15754570 + |
| chrIV | 15757370 | 15757390 + |
| chrIV | 15788606 | 15788626 - |



|       |          |            |
|-------|----------|------------|
| chrIV | 15804912 | 15804932 - |
| chrIV | 15885241 | 15885261 + |
| chrIV | 15889739 | 15889759 - |
| chrIV | 15948324 | 15948344 - |
| chrIV | 15962973 | 15962993 - |
| chrIV | 15988695 | 15988715 - |
| chrIV | 16019042 | 16019062 - |
| chrIV | 16028424 | 16028444 + |
| chrIV | 16042968 | 16042988 - |
| chrIV | 16044085 | 16044105 - |
| chrIV | 16099392 | 16099412 - |
| chrIV | 16100614 | 16100634 - |
| chrIV | 16101000 | 16101020 + |
| chrIV | 16101271 | 16101291 + |
| chrIV | 16101677 | 16101703 - |
| chrIV | 16101757 | 16101777 + |
| chrIV | 16102320 | 16102340 + |
| chrIV | 16106634 | 16106654 - |
| chrIV | 16107214 | 16107234 + |
| chrIV | 16107271 | 16107291 + |
| chrIV | 16107683 | 16107703 - |
| chrIV | 16107954 | 16107974 - |
| chrIV | 16108340 | 16108360 + |
| chrIV | 16122086 | 16122106 + |
| chrIV | 16140258 | 16140278 + |
| chrIV | 16147846 | 16147866 - |
| chrIV | 16149694 | 16149714 + |
| chrIV | 16171702 | 16171722 + |
| chrIV | 16171841 | 16171861 + |
| chrIV | 16171980 | 16172000 + |
| chrIV | 16172119 | 16172139 + |
| chrIV | 16189389 | 16189409 - |
| chrIV | 16203655 | 16203675 - |
| chrIV | 16270924 | 16270944 - |
| chrIV | 16352964 | 16352984 + |
| chrIV | 16390279 | 16390299 + |
| chrIV | 16390446 | 16390466 + |
| chrIV | 16390705 | 16390725 + |
| chrIV | 16390871 | 16390891 + |
| chrIV | 16434570 | 16434590 - |
| chrIV | 16451152 | 16451172 + |
| chrIV | 16455765 | 16455785 + |
| chrIV | 16460513 | 16460533 + |
| chrIV | 16464731 | 16464751 + |
| chrIV | 16465191 | 16465211 - |
| chrIV | 16465448 | 16465468 + |
| chrIV | 16465908 | 16465928 - |
| chrIV | 16481822 | 16481842 + |
| chrIV | 16508273 | 16508293 + |
| chrIV | 16510788 | 16510808 - |
| chrIV | 16510985 | 16511005 + |
| chrIV | 16511478 | 16511498 - |

|       |          |            |
|-------|----------|------------|
| chrIV | 16511679 | 16511699 + |
| chrIV | 16513013 | 16513033 + |
| chrIV | 16515330 | 16515350 - |
| chrIV | 16515531 | 16515551 + |
| chrIV | 16516250 | 16516270 + |
| chrIV | 16518568 | 16518588 - |
| chrIV | 16518769 | 16518789 + |
| chrIV | 16519488 | 16519508 + |
| chrIV | 16544721 | 16544741 + |
| chrIV | 16560736 | 16560756 - |
| chrIV | 16566457 | 16566477 + |
| chrIV | 16568247 | 16568267 + |
| chrIV | 16585026 | 16585046 + |
| chrIV | 16590395 | 16590415 - |
| chrIV | 16590420 | 16590440 + |
| chrIV | 16590691 | 16590717 - |
| chrIV | 16591055 | 16591075 - |
| chrIV | 16591495 | 16591515 + |
| chrIV | 16592431 | 16592451 - |
| chrIV | 16592598 | 16592618 - |
| chrIV | 16593627 | 16593647 + |
| chrIV | 16594562 | 16594583 - |
| chrIV | 16595003 | 16595023 + |
| chrIV | 16595361 | 16595381 + |
| chrIV | 16595637 | 16595658 - |
| chrIV | 16595663 | 16595683 + |
| chrIV | 16606951 | 16606971 - |
| chrIV | 16637011 | 16637031 + |
| chrIV | 16637354 | 16637374 + |
| chrIV | 16637597 | 16637617 + |
| chrIV | 16638155 | 16638175 + |
| chrIV | 16640516 | 16640536 + |
| chrIV | 16640635 | 16640655 + |
| chrIV | 16691937 | 16691957 + |
| chrIV | 16702861 | 16702881 + |
| chrIV | 16704786 | 16704806 + |
| chrIV | 16712424 | 16712444 - |
| chrIV | 16713019 | 16713039 - |
| chrIV | 16713951 | 16713971 - |
| chrIV | 16714546 | 16714566 - |
| chrIV | 16724756 | 16724776 + |
| chrIV | 16771721 | 16771741 + |
| chrIV | 16808142 | 16808162 + |
| chrIV | 16808246 | 16808266 - |
| chrIV | 16808504 | 16808524 + |
| chrIV | 16808954 | 16808974 - |
| chrIV | 16809104 | 16809124 - |
| chrIV | 16809382 | 16809402 - |
| chrIV | 16809466 | 16809486 - |
| chrIV | 16898546 | 16898566 - |
| chrIV | 16899029 | 16899049 + |
| chrIV | 16900159 | 16900179 - |

|       |          |            |
|-------|----------|------------|
| chrIV | 16981313 | 16981333 + |
| chrIV | 16986071 | 16986091 + |
| chrIV | 17143087 | 17143107 + |
| chrIV | 17143371 | 17143391 - |
| chrIV | 17154227 | 17154255 - |
| chrIV | 17177808 | 17177828 + |
| chrIV | 17185935 | 17185955 - |
| chrIV | 17248778 | 17248798 - |
| chrIV | 3678721  | 3678741 +  |
| chrIV | 4838714  | 4838734 +  |
| chrIV | 4838804  | 4838824 +  |
| chrIV | 4864156  | 4864176 +  |
| chrIV | 4923420  | 4923440 +  |
| chrIV | 4925689  | 4925709 +  |
| chrIV | 4927973  | 4927993 +  |
| chrIV | 4936776  | 4936796 -  |
| chrIV | 4970028  | 4970048 +  |
| chrIV | 5234438  | 5234458 +  |
| chrIV | 5234740  | 5234761 -  |
| chrIV | 5235614  | 5235634 +  |
| chrIV | 5235917  | 5235937 -  |
| chrIV | 5271206  | 5271226 +  |
| chrIV | 5282080  | 5282100 -  |
| chrIV | 5316134  | 5316154 -  |
| chrIV | 5317589  | 5317609 -  |
| chrIV | 5481053  | 5481073 -  |
| chrIV | 5840581  | 5840601 -  |
| chrIV | 5867973  | 5867993 -  |
| chrIV | 5906557  | 5906577 -  |
| chrIV | 5920969  | 5920989 +  |
| chrIV | 5949844  | 5949864 +  |
| chrIV | 5951424  | 5951444 -  |
| chrIV | 6124374  | 6124394 +  |
| chrIV | 6221978  | 6221998 +  |
| chrIV | 6383695  | 6383715 +  |
| chrIV | 6468126  | 6468146 -  |
| chrIV | 6569896  | 6569916 -  |
| chrIV | 6628279  | 6628299 -  |
| chrIV | 7071563  | 7071583 -  |
| chrIV | 7072531  | 7072551 +  |
| chrIV | 7467950  | 7467970 +  |
| chrIV | 7840616  | 7840636 +  |
| chrIV | 8125497  | 8125517 +  |
| chrIV | 9850213  | 9850233 -  |
| chrIV | 9870383  | 9870403 -  |
| chrV  | 10180154 | 10180176 + |
| chrV  | 10445628 | 10445648 + |
| chrV  | 10507250 | 10507270 - |
| chrV  | 1084929  | 1084949 -  |
| chrV  | 11548466 | 11548486 + |
| chrV  | 12118365 | 12118385 - |
| chrV  | 12749262 | 12749282 + |

|      |          |            |
|------|----------|------------|
| chrV | 13831716 | 13831736 + |
| chrV | 15539605 | 15539625 + |
| chrV | 17200056 | 17200076 + |
| chrV | 19775310 | 19775330 - |
| chrV | 19778880 | 19778900 - |
| chrV | 2046550  | 2046570 +  |
| chrV | 666981   | 667001 -   |
| chrV | 8460098  | 8460118 +  |
| chrV | 8796396  | 8796416 +  |
| chrV | 9696721  | 9696741 +  |
| chrX | 13040914 | 13040934 - |
| chrX | 13691479 | 13691499 + |
| chrX | 13852850 | 13852870 - |
| chrX | 14037702 | 14037722 + |
| chrX | 14331718 | 14331738 - |
| chrX | 16021314 | 16021334 + |
| chrX | 2367247  | 2367267 +  |
| chrX | 3522431  | 3522451 -  |
| chrX | 470916   | 470936 -   |
| chrX | 5220142  | 5220162 -  |
| chrX | 6446005  | 6446025 +  |
| chrX | 6453759  | 6453779 +  |
| chrX | 6839056  | 6839076 +  |
| chrX | 7666981  | 7667001 -  |
| chrX | 7895856  | 7895876 +  |
| chrX | 7955712  | 7955732 +  |
| chrX | 8651448  | 8651468 -  |
| chrX | 932284   | 932304 +   |

**Supplementary Table 5.** Sequencing miRNA expression.

Deep sequencing reads (“Illumina”) were mapped to the genome as described in the methods. The counts in this table give the number of weighted mappings of reads overlapping with mature miRNAs.

|               | 1-cell<br>embryo | Living 1-cell<br>embryo | 2-4-cell<br>embryo | Older embryos<br>(sorted) | Post-gastrulation<br>embryo | Mixed<br>embryo |
|---------------|------------------|-------------------------|--------------------|---------------------------|-----------------------------|-----------------|
| cel-let-7     | 2.40             | 41.91                   | 0.00               | 0.00                      | 69.13                       | 12.99           |
| cel-lin-4     | 41.00            | 1.00                    | 1.00               | 9.00                      | 29.00                       | 0.00            |
| cel-lsy-6     | 1.00             | 4.00                    | 1.00               | 41.00                     | 16.00                       | 23.00           |
| cel-miR-1     | 20.50            | 90.88                   | 43.50              | 2159.31                   | 1298.22                     | 397.96          |
| cel-miR-1018  | 1.00             | 16.18                   | 1.00               | 44.00                     | 205.00                      | 86.00           |
| cel-miR-1019  | 0.00             | 0.00                    | 0.00               | 0.00                      | 0.00                        | 0.00            |
| cel-miR-1020  | 0.00             | 0.00                    | 0.00               | 0.00                      | 7.50                        | 0.00            |
| cel-miR-1021  | 0.00             | 0.00                    | 0.00               | 0.00                      | 1.00                        | 0.00            |
| cel-miR-1022  | 8.00             | 85.97                   | 12.50              | 1333.00                   | 902.55                      | 443.67          |
| cel-miR-124   | 0.00             | 51.67                   | 1.00               | 4.00                      | 11.00                       | 12.57           |
| cel-miR-1817  | 0.00             | 0.00                    | 0.00               | 0.00                      | 0.00                        | 0.00            |
| cel-miR-1818  | 0.00             | 0.00                    | 0.00               | 0.00                      | 0.00                        | 0.00            |
| cel-miR-1819  | 16.00            | 9.00                    | 26.00              | 497.00                    | 99.00                       | 32.00           |
| cel-miR-1820  | 0.00             | 39.29                   | 1.00               | 96.00                     | 188.70                      | 185.11          |
| cel-miR-1821  | 1.00             | 3.00                    | 0.00               | 3.00                      | 13.00                       | 12.02           |
| cel-miR-1822  | 0.00             | 0.00                    | 0.00               | 4.00                      | 6.00                        | 1.02            |
| cel-miR-1823  | 0.00             | 1.00                    | 0.00               | 22.00                     | 75.00                       | 14.00           |
| cel-miR-1824  | 0.00             | 0.00                    | 0.00               | 0.00                      | 0.00                        | 0.00            |
| cel-miR-1828  | 0.00             | 0.00                    | 0.00               | 0.00                      | 1.00                        | 0.00            |
| cel-miR-1829a | 0.00             | 2.00                    | 2.00               | 6.00                      | 17.50                       | 3.00            |
| cel-miR-1829b | 1326.50          | 183.20                  | 720.00             | 270.00                    | 803.50                      | 208.00          |
| cel-miR-1829c | 365.50           | 74.00                   | 295.00             | 377.50                    | 354.00                      | 106.00          |
| cel-miR-1830  | 0.00             | 0.00                    | 0.00               | 0.00                      | 4.00                        | 0.03            |
| cel-miR-1831  | 16.00            | 14.58                   | 17.95              | 3.50                      | 9.00                        | 2.00            |
| cel-miR-1832  | 4.33             | 5.10                    | 5.33               | 85.54                     | 18.20                       | 14.84           |
| cel-miR-1833  | 0.00             | 0.00                    | 0.00               | 0.50                      | 2.50                        | 0.00            |
| cel-miR-1834  | 4.00             | 0.00                    | 3.00               | 0.00                      | 4.00                        | 1.00            |
| cel-miR-2     | 23.00            | 184.50                  | 27.00              | 1671.17                   | 1281.00                     | 1745.67         |
| cel-miR-227   | 6.00             | 78.00                   | 20.00              | 552.00                    | 251.17                      | 267.70          |
| cel-miR-228   | 1209.00          | 7719.82                 | 1419.00            | 117559.58                 | 69936.33                    | 37459.52        |
| cel-miR-229   | 30.00            | 177.00                  | 37.00              | 244.00                    | 2555.00                     | 1141.00         |
| cel-miR-230   | 0.00             | 4.00                    | 0.00               | 46.00                     | 72.00                       | 20.00           |
| cel-miR-231   | 28.00            | 96.00                   | 27.00              | 1866.17                   | 648.00                      | 575.17          |
| cel-miR-232   | 0.00             | 15.00                   | 0.00               | 26.67                     | 59.00                       | 169.00          |
| cel-miR-233   | 3.00             | 135.50                  | 17.00              | 891.53                    | 352.25                      | 1093.88         |
| cel-miR-234   | 0.00             | 1.56                    | 0.00               | 31.00                     | 31.00                       | 19.00           |
| cel-miR-235   | 6.00             | 286.90                  | 4.00               | 279.83                    | 1258.67                     | 1221.17         |
| cel-miR-236   | 0.00             | 105.50                  | 24.00              | 958.00                    | 1123.67                     | 550.00          |
| cel-miR-237   | 1.00             | 0.00                    | 0.00               | 0.00                      | 0.00                        | 0.00            |
| cel-miR-238   | 19.00            | 91.67                   | 16.00              | 505.00                    | 134.33                      | 418.67          |
| cel-miR-239a  | 4.00             | 14.00                   | 0.00               | 4.00                      | 14.00                       | 155.00          |
| cel-miR-239b  | 0.00             | 8.00                    | 0.00               | 0.00                      | 14.50                       | 156.00          |
| cel-miR-240   | 0.00             | 0.00                    | 0.00               | 1.00                      | 9.00                        | 5.00            |
| cel-miR-241   | 1.00             | 4.00                    | 0.00               | 0.00                      | 37.00                       | 6.00            |
| cel-miR-242   | 1.00             | 3.00                    | 1.00               | 211.00                    | 36.00                       | 33.00           |
| cel-miR-243   | 3.00             | 20.23                   | 8.00               | 106.00                    | 278.33                      | 120.00          |
| cel-miR-244   | 0.00             | 164.00                  | 2.00               | 74.00                     | 803.17                      | 536.50          |
| cel-miR-245   | 0.00             | 13.00                   | 0.00               | 23.00                     | 58.00                       | 82.00           |
| cel-miR-246   | 4.00             | 0.00                    | 0.00               | 0.00                      | 10.00                       | 0.00            |

|               |           |          |           |           |           |          |
|---------------|-----------|----------|-----------|-----------|-----------|----------|
| cel-miR-247   | 0.00      | 0.00     | 0.00      | 0.00      | 1.00      | 0.00     |
| cel-miR-248   | 8.00      | 84.50    | 4.00      | 571.00    | 444.33    | 249.50   |
| cel-miR-249   | 0.00      | 3.00     | 0.00      | 11.00     | 2.00      | 10.00    |
| cel-miR-250   | 3172.33   | 985.42   | 2703.00   | 1732.42   | 5756.73   | 827.75   |
| cel-miR-251   | 0.00      | 26.00    | 0.00      | 33.00     | 116.00    | 154.00   |
| cel-miR-252   | 24.00     | 235.75   | 33.00     | 2847.25   | 5121.42   | 1241.17  |
| cel-miR-253   | 316.25    | 451.25   | 222.08    | 193.42    | 220.50    | 155.25   |
| cel-miR-254   | 4.00      | 39.00    | 1.00      | 42.00     | 57.00     | 143.67   |
| cel-miR-255   | 8.00      | 5.00     | 14.00     | 471.50    | 323.50    | 54.00    |
| cel-miR-256   | 0.00      | 0.03     | 0.00      | 1.00      | 0.17      | 0.00     |
| cel-miR-257   | 0.00      | 0.00     | 0.00      | 0.00      | 0.00      | 0.00     |
| cel-miR-258_0 | 0.00      | 0.00     | 0.00      | 0.00      | 0.00      | 0.00     |
| cel-miR-258_1 | 0.00      | 0.00     | 0.00      | 0.00      | 0.00      | 0.00     |
| cel-miR-259   | 0.00      | 9.00     | 0.00      | 11.00     | 73.00     | 53.00    |
| cel-miR-260   | 6.00      | 15.00    | 8.00      | 161.50    | 147.50    | 13.50    |
| cel-miR-261   | 0.00      | 0.00     | 0.00      | 0.00      | 0.00      | 0.00     |
| cel-miR-262   | 0.00      | 5.00     | 0.00      | 4.00      | 10.00     | 5.00     |
| cel-miR-264   | 0.00      | 0.00     | 0.00      | 0.00      | 0.00      | 0.00     |
| cel-miR-265   | 0.00      | 0.00     | 0.00      | 0.00      | 0.00      | 0.13     |
| cel-miR-266   | 1.00      | 0.00     | 2.00      | 0.50      | 5.00      | 0.00     |
| cel-miR-267   | 0.00      | 0.00     | 0.00      | 0.00      | 0.00      | 0.00     |
| cel-miR-268   | 0.00      | 0.00     | 0.00      | 0.00      | 0.00      | 0.00     |
| cel-miR-269   | 0.00      | 0.00     | 0.00      | 0.00      | 0.00      | 0.00     |
| cel-miR-270   | 0.00      | 0.00     | 0.00      | 0.00      | 0.00      | 0.00     |
| cel-miR-271   | 0.00      | 0.09     | 0.00      | 0.00      | 0.00      | 0.10     |
| cel-miR-272   | 0.00      | 0.00     | 0.00      | 0.00      | 0.00      | 0.00     |
| cel-miR-273   | 0.00      | 0.00     | 0.00      | 0.00      | 0.00      | 0.03     |
| cel-miR-34    | 14.00     | 70.56    | 8.00      | 144.00    | 980.17    | 598.83   |
| cel-miR-35    | 225010.50 | 58848.66 | 174042.17 | 491582.83 | 281738.50 | 76368.83 |
| cel-miR-353   | 1.00      | 1.00     | 0.00      | 0.00      | 0.00      | 0.00     |
| cel-miR-354   | 0.00      | 0.00     | 0.00      | 0.00      | 0.00      | 0.00     |
| cel-miR-355   | 0.00      | 0.00     | 0.00      | 2.00      | 1.00      | 0.00     |
| cel-miR-356   | 0.00      | 0.00     | 0.00      | 0.00      | 0.00      | 0.00     |
| cel-miR-357   | 0.00      | 1.00     | 0.00      | 0.00      | 4.00      | 4.00     |
| cel-miR-358   | 0.00      | 0.00     | 0.00      | 0.00      | 1.00      | 0.00     |
| cel-miR-359   | 0.00      | 0.00     | 0.00      | 8.00      | 1.00      | 0.00     |
| cel-miR-36    | 5970.33   | 4956.20  | 6545.67   | 14193.83  | 28625.38  | 11124.73 |
| cel-miR-360   | 0.00      | 1.00     | 0.00      | 0.00      | 1.00      | 0.00     |
| cel-miR-37    | 147723.50 | 40340.79 | 120379.75 | 327774.83 | 233689.92 | 56265.98 |
| cel-miR-38    | 391.00    | 478.00   | 493.00    | 1198.00   | 2962.83   | 1309.08  |
| cel-miR-39    | 1576.00   | 1830.67  | 1520.50   | 3389.50   | 4774.57   | 2906.50  |
| cel-miR-392   | 0.00      | 1.00     | 0.00      | 0.00      | 0.00      | 0.00     |
| cel-miR-40    | 12775.30  | 14351.51 | 15148.00  | 35193.33  | 110207.07 | 23001.79 |
| cel-miR-41    | 1.00      | 19.81    | 2.00      | 3.50      | 48.74     | 58.90    |
| cel-miR-42    | 22.00     | 255.00   | 18.00     | 533.00    | 3557.50   | 2039.25  |
| cel-miR-43    | 0.00      | 21.02    | 0.00      | 23.67     | 203.17    | 378.68   |
| cel-miR-44    | 1849.33   | 6737.23  | 1905.42   | 43623.15  | 130025.37 | 33598.78 |
| cel-miR-45    | 1679.00   | 6743.92  | 1828.50   | 42450.18  | 131247.47 | 33654.79 |
| cel-miR-46    | 0.00      | 31.00    | 4.00      | 26.00     | 66.50     | 110.00   |
| cel-miR-47    | 4.00      | 90.67    | 1.00      | 164.00    | 358.00    | 542.00   |
| cel-miR-48    | 1117.33   | 137.50   | 161.17    | 3298.25   | 3774.83   | 520.00   |

|               |          |           |          |            |            |           |
|---------------|----------|-----------|----------|------------|------------|-----------|
| cel-miR-49    | 26.00    | 203.00    | 61.00    | 4435.67    | 5866.50    | 2475.01   |
| cel-miR-50    | 115.00   | 490.01    | 182.00   | 4542.90    | 5886.12    | 2309.22   |
| cel-miR-51    | 834.00   | 2788.04   | 850.17   | 3151.83    | 15710.00   | 10932.08  |
| cel-miR-52    | 328.00   | 15292.20  | 463.00   | 15176.67   | 129524.70  | 116322.52 |
| cel-miR-53    | 17.00    | 517.58    | 19.00    | 302.00     | 4666.32    | 3457.57   |
| cel-miR-54    | 17.00    | 2405.83   | 32.00    | 445.83     | 11673.68   | 17369.42  |
| cel-miR-55    | 48.50    | 709.06    | 59.50    | 3138.50    | 8046.71    | 3805.27   |
| cel-miR-56    | 19.00    | 666.76    | 41.50    | 1335.75    | 5856.65    | 4045.67   |
| cel-miR-57    | 22.00    | 2252.52   | 59.00    | 2935.50    | 5128.00    | 10722.36  |
| cel-miR-58    | 48438.07 | 105478.63 | 46952.30 | 2331147.57 | 1106121.43 | 677814.19 |
| cel-miR-59    | 0.00     | 6.00      | 0.00     | 1.00       | 47.50      | 19.00     |
| cel-miR-60    | 1.00     | 140.17    | 6.00     | 98.00      | 1812.50    | 1620.83   |
| cel-miR-61    | 1439.22  | 1310.47   | 1307.58  | 1277.63    | 2370.33    | 1453.13   |
| cel-miR-62    | 0.00     | 10.00     | 0.00     | 9.00       | 91.50      | 157.50    |
| cel-miR-63    | 5.00     | 30.83     | 10.67    | 870.17     | 455.33     | 578.83    |
| cel-miR-64    | 2566.00  | 1697.75   | 3453.25  | 18880.00   | 14887.38   | 6180.65   |
| cel-miR-65    | 1609.92  | 733.75    | 2356.42  | 12711.67   | 14056.13   | 2801.98   |
| cel-miR-66    | 242.50   | 394.24    | 290.00   | 2129.00    | 11679.43   | 1422.83   |
| cel-miR-67    | 0.00     | 8.00      | 1.00     | 21.00      | 52.00      | 55.50     |
| cel-miR-70    | 90.00    | 2709.92   | 9.00     | 302.75     | 624.50     | 15313.77  |
| cel-miR-71    | 2642.33  | 1969.44   | 1925.00  | 23952.58   | 15217.41   | 8611.70   |
| cel-miR-72    | 56643.33 | 20122.82  | 45382.50 | 223554.93  | 425876.29  | 49052.80  |
| cel-miR-73    | 7417.00  | 14827.41  | 9364.67  | 188036.61  | 91188.92   | 45469.37  |
| cel-miR-74    | 54.00    | 196.67    | 78.00    | 1665.00    | 567.00     | 1520.67   |
| cel-miR-75    | 7.00     | 54.00     | 0.00     | 76.00      | 380.83     | 342.50    |
| cel-miR-76    | 1.00     | 16.00     | 4.00     | 144.00     | 80.00      | 129.00    |
| cel-miR-77    | 0.00     | 0.00      | 0.00     | 0.00       | 21.33      | 1.00      |
| cel-miR-78    | 43.00    | 14.00     | 26.00    | 26.00      | 23.00      | 0.00      |
| cel-miR-784   | 0.00     | 0.00      | 0.00     | 0.00       | 0.17       | 0.00      |
| cel-miR-785   | 0.00     | 1.00      | 2.00     | 9.00       | 43.00      | 15.00     |
| cel-miR-786   | 0.00     | 0.00      | 0.00     | 4.00       | 5.00       | 7.00      |
| cel-miR-787   | 0.00     | 6.00      | 0.00     | 21.00      | 143.00     | 30.00     |
| cel-miR-788   | 0.00     | 16.00     | 0.00     | 28.00      | 30.00      | 59.00     |
| cel-miR-789_0 | 0.00     | 11.95     | 0.00     | 0.00       | 3.17       | 5.67      |
| cel-miR-789_1 | 0.00     | 1.74      | 0.00     | 0.00       | 3.17       | 4.86      |
| cel-miR-79    | 1.00     | 72.00     | 1.00     | 127.00     | 503.17     | 641.00    |
| cel-miR-790   | 0.00     | 15.02     | 1.00     | 105.00     | 241.67     | 109.04    |
| cel-miR-791   | 0.00     | 3.00      | 0.00     | 75.00      | 19.00      | 16.00     |
| cel-miR-792   | 0.00     | 0.00      | 0.00     | 3.00       | 0.00       | 19.67     |
| cel-miR-793   | 0.00     | 4.00      | 1.00     | 31.00      | 88.00      | 20.00     |
| cel-miR-794   | 0.00     | 0.00      | 0.00     | 0.00       | 0.00       | 0.00      |
| cel-miR-795   | 4.00     | 3.00      | 8.00     | 103.00     | 42.00      | 6.00      |
| cel-miR-796   | 195.00   | 238.18    | 173.00   | 5365.50    | 2182.42    | 1119.33   |
| cel-miR-797   | 0.00     | 0.00      | 0.00     | 4.00       | 8.00       | 9.00      |
| cel-miR-798   | 2.00     | 1.00      | 4.00     | 0.00       | 12.00      | 3.00      |
| cel-miR-799   | 0.00     | 0.00      | 0.00     | 7.00       | 10.00      | 2.00      |
| cel-miR-80    | 212.00   | 1011.33   | 211.00   | 6651.08    | 9369.36    | 7471.83   |
| cel-miR-800   | 0.00     | 0.00      | 0.00     | 2.00       | 1.25       | 0.00      |
| cel-miR-81    | 159.00   | 3440.07   | 325.00   | 17719.67   | 29586.55   | 14827.39  |
| cel-miR-82    | 63.50    | 2470.86   | 162.00   | 6453.00    | 26389.10   | 16844.23  |
| cel-miR-83    | 1.00     | 60.50     | 1.00     | 74.00      | 606.00     | 489.00    |



|                                        |       |        |        |         |         |         |
|----------------------------------------|-------|--------|--------|---------|---------|---------|
| cel-miR-84                             | 3.00  | 2.00   | 1.00   | 11.00   | 20.00   | 7.00    |
| cel-miR-85                             | 1.00  | 0.00   | 0.00   | 0.00    | 10.00   | 4.00    |
| cel-miR-86                             | 0.00  | 241.67 | 6.00   | 152.67  | 1221.42 | 1798.50 |
| cel-miR-87                             | 10.00 | 334.67 | 4.00   | 570.00  | 1663.08 | 1635.00 |
| cel-miR-90                             | 81.57 | 392.38 | 112.67 | 2629.63 | 1735.27 | 656.24  |
| cel-miR-novel-I_1628_1_mature_r0_r     | 1.00  | 11.00  | 1.00   | 8.00    | 67.50   | 20.00   |
| cel-miR-novel-I_1628_1_star_r0_m1_     | 0.00  | 0.00   | 1.00   | 10.00   | 18.00   | 4.00    |
| cel-miR-novel-I_6704_3_mature_r0_r     | 0.00  | 0.00   | 0.00   | 2.00    | 0.00    | 2.00    |
| cel-miR-novel-I_6704_3_star_r0_m1_     | 0.00  | 0.00   | 0.00   | 0.00    | 1.00    | 0.00    |
| cel-miR-novel-I_7174_4_mature_r0_r     | 0.00  | 2.00   | 0.00   | 4.00    | 122.00  | 14.50   |
| cel-miR-novel-II_10624_star_r0_m3_1    | 0.00  | 0.00   | 0.00   | 0.00    | 0.00    | 0.33    |
| cel-miR-novel-II_11035_6_mature_r0_    | 0.00  | 0.00   | 0.00   | 0.00    | 2.00    | 0.00    |
| cel-miR-novel-II_11510_7_mature_r0_    | 0.00  | 0.00   | 0.00   | 8.00    | 29.00   | 0.00    |
| cel-miR-novel-II_13808_9_mature_r0_    | 0.00  | 0.00   | 0.00   | 0.20    | 2.20    | 0.00    |
| cel-miR-novel-II_14421_10_mature_r0_   | 0.00  | 0.00   | 0.00   | 0.00    | 3.00    | 5.00    |
| cel-miR-novel-II_8551_12_mature_r0_    | 0.00  | 0.01   | 0.00   | 14.00   | 32.20   | 10.00   |
| cel-miR-novel-II_8551_12_star_r0_m2_   | 0.00  | 0.01   | 0.00   | 0.70    | 1.37    | 1.17    |
| cel-miR-novel-III_15426_14_mature_r0_r | 0.00  | 2.00   | 4.00   | 4.00    | 54.50   | 26.00   |
| cel-miR-novel-III_15426_14_star_r0_r   | 0.00  | 6.00   | 1.00   | 19.00   | 38.00   | 8.00    |
| cel-miR-novel-III_15586_15_mature_r0_r | 3.00  | 0.50   | 1.00   | 0.50    | 7.25    | 0.00    |
| cel-miR-novel-III_15586_15_mature_r0_r | 3.25  | 0.50   | 1.00   | 0.50    | 10.00   | 0.00    |
| cel-miR-novel-III_15586_15_star_r0_r   | 0.00  | 0.00   | 0.00   | 0.00    | 1.00    | 0.00    |
| cel-miR-novel-III_15586_15_star_r0_r   | 0.00  | 0.00   | 0.00   | 0.00    | 1.00    | 0.00    |
| cel-miR-novel-III_16200_16_mature_r0_r | 3.00  | 0.00   | 1.00   | 23.00   | 17.00   | 6.00    |
| cel-miR-novel-III_16200_16_star_r0_r   | 0.00  | 0.00   | 0.00   | 1.00    | 1.00    | 0.00    |
| cel-miR-novel-III_18251_18_mature_r0_r | 0.00  | 0.00   | 0.00   | 0.00    | 3.33    | 1.00    |
| cel-miR-novel-III_18251_18_star_r0_r   | 0.00  | 0.00   | 0.00   | 0.00    | 0.50    | 0.00    |
| cel-miR-novel-IV_21548_20_mature_r0_r  | 0.00  | 0.00   | 0.00   | 4.00    | 6.50    | 3.00    |
| cel-miR-novel-IV_21548_20_star_r0_r    | 0.00  | 2.00   | 0.00   | 1.00    | 1.00    | 0.00    |
| cel-miR-novel-IV_21554_21_mature_r0_r  | 0.00  | 4.00   | 0.00   | 1.00    | 12.50   | 6.00    |
| cel-miR-novel-IV_21554_21_star_r0_r    | 0.00  | 0.00   | 0.00   | 0.00    | 1.00    | 0.00    |
| cel-miR-novel-IV_29258_23_mature_r0_r  | 0.00  | 0.01   | 0.00   | 2.60    | 5.27    | 2.67    |
| cel-miR-novel-IV_29258_23_star_r0_r    | 0.00  | 0.00   | 0.00   | 0.00    | 2.10    | 0.00    |
| cel-miR-novel-X_36996_25_mature_r0_r   | 0.00  | 1.00   | 0.00   | 0.00    | 9.00    | 0.00    |
| cel-miR-novel-X_36996_25_star_r0_r     | 0.00  | 0.00   | 0.00   | 0.00    | 1.00    | 0.00    |
| cel-miR-novel-X_38281_mature_r0_m      | 0.00  | 1.01   | 6.00   | 20.00   | 4.00    | 1.00    |

**Supplementary Table 6.** 21U-RNAs are highly expressed in 1-cell embryos. The table represents unnormalized read counts for 21U-RNAs in the different samples that have been analyzed.

|                                    | <b>1-cell stage (fixed resorted)</b> | <b>1-cell stage (living-sorted)</b> | <b>2-4-cell stage (fixed sorted)</b> | <b>Post-gastrulation embryos</b> | <b>Older sorted embryos</b> | <b>Mixed embryos</b> |
|------------------------------------|--------------------------------------|-------------------------------------|--------------------------------------|----------------------------------|-----------------------------|----------------------|
| 21U-RNA unnormalized reads (total) | 6048                                 | 5484                                | 6133                                 | 5837                             | 4038                        | 2700                 |

**Supplementary Table 7.** Expression of 21U-RNAs.

15703 21U-RNA sequences were retrieved from the supplementary material of Batista *et al*, 2009, and mapped to the genome. The subset mapping to unique positions in the genome was quantified by reporting weighted mappings of reads that overlap with each 21U-RNA.

| 21U-RNA     | Living |        |          | Older embryos<br>(sorted) | Post-gastru.<br>embryos | Mixed |
|-------------|--------|--------|----------|---------------------------|-------------------------|-------|
|             | 1-cell | 1-cell | 2-4-cell |                           |                         |       |
| 21UR-10     | 0.0    | 4.3    | 0.0      | 1.0                       | 0.0                     | 0.0   |
| 21UR-100    | 0.0    | 1.0    | 1.0      | 0.0                       | 1.0                     | 0.0   |
| 21UR-1000   | 0.0    | 0.0    | 0.0      | 0.0                       | 1.0                     | 0.0   |
| 21UR-10000  | 28.0   | 1.0    | 34.0     | 4.0                       | 6.0                     | 0.0   |
| 21UR-100000 | 0.0    | 0.0    | 0.0      | 0.0                       | 0.0                     | 0.0   |
| 21UR-100010 | 0.0    | 0.0    | 0.0      | 0.0                       | 0.0                     | 0.0   |
| 21UR-100020 | 0.0    | 0.0    | 0.0      | 0.0                       | 0.1                     | 0.0   |
| 21UR-100030 | 141.0  | 14.0   | 92.0     | 53.0                      | 20.0                    | 0.0   |
| 21UR-100040 | 11.0   | 56.5   | 17.0     | 16.0                      | 41.0                    | 10.0  |
| 21UR-100050 | 0.0    | 1.0    | 0.0      | 0.0                       | 0.0                     | 0.0   |
| 21UR-100070 | 0.0    | 0.0    | 0.0      | 0.0                       | 0.0                     | 0.0   |
| 21UR-100080 | 0.0    | 0.0    | 0.0      | 0.0                       | 0.0                     | 0.0   |
| 21UR-100090 | 0.0    | 1.0    | 1.0      | 0.0                       | 2.0                     | 0.0   |
| 21UR-10010  | 0.0    | 0.0    | 0.0      | 0.0                       | 0.0                     | 0.0   |
| 21UR-100100 | 0.0    | 0.0    | 0.0      | 0.0                       | 0.0                     | 0.0   |
| 21UR-100110 | 0.0    | 0.0    | 0.0      | 0.0                       | 0.0                     | 0.0   |
| 21UR-100120 | 4.0    | 0.0    | 4.0      | 1.0                       | 4.0                     | 0.0   |
| 21UR-100130 | 0.0    | 0.0    | 0.0      | 0.0                       | 0.0                     | 0.0   |
| 21UR-100140 | 41.0   | 12.5   | 28.8     | 10.0                      | 12.0                    | 0.0   |
| 21UR-100150 | 0.0    | 1.0    | 0.0      | 0.0                       | 0.0                     | 0.0   |
| 21UR-100160 | 1.0    | 2.0    | 0.0      | 0.0                       | 0.0                     | 0.0   |
| 21UR-100170 | 4.0    | 7.0    | 4.0      | 3.7                       | 9.0                     | 1.0   |
| 21UR-100180 | 0.0    | 0.0    | 0.0      | 0.0                       | 0.0                     | 0.0   |
| 21UR-100190 | 0.0    | 0.0    | 0.0      | 0.0                       | 0.0                     | 0.0   |
| 21UR-10020  | 6.0    | 7.0    | 4.0      | 1.0                       | 8.0                     | 0.0   |
| 21UR-100200 | 22.0   | 28.0   | 47.3     | 21.0                      | 18.0                    | 5.0   |
| 21UR-100210 | 0.0    | 0.0    | 0.0      | 0.0                       | 0.0                     | 0.0   |
| 21UR-100220 | 0.0    | 1.0    | 0.0      | 0.0                       | 0.0                     | 0.0   |
| 21UR-100230 | 0.0    | 0.0    | 0.0      | 0.0                       | 0.0                     | 0.0   |
| 21UR-100240 | 0.0    | 0.0    | 0.0      | 0.0                       | 0.0                     | 0.0   |
| 21UR-100250 | 21.0   | 6.0    | 14.0     | 10.0                      | 15.0                    | 0.0   |
| 21UR-100260 | 0.0    | 1.0    | 0.0      | 1.0                       | 0.0                     | 0.0   |
| 21UR-100270 | 0.0    | 0.0    | 0.0      | 0.0                       | 2.7                     | 0.0   |
| 21UR-100290 | 0.0    | 0.0    | 0.0      | 0.0                       | 0.0                     | 0.0   |
| 21UR-10030  | 0.0    | 0.0    | 0.0      | 0.0                       | 1.0                     | 0.0   |
| 21UR-100300 | 0.0    | 0.0    | 0.0      | 0.0                       | 0.0                     | 0.0   |
| 21UR-100310 | 0.0    | 0.0    | 0.0      | 0.0                       | 0.0                     | 0.0   |
| 21UR-100320 | 0.0    | 0.0    | 0.0      | 0.0                       | 1.0                     | 0.0   |
| 21UR-100330 | 4.0    | 1.0    | 2.0      | 0.0                       | 4.0                     | 0.0   |
| 21UR-100340 | 49.0   | 8.0    | 48.0     | 19.0                      | 30.0                    | 0.0   |
| 21UR-100350 | 0.0    | 0.0    | 0.0      | 0.0                       | 0.0                     | 0.0   |
| 21UR-100360 | 1.0    | 0.0    | 1.0      | 1.0                       | 0.0                     | 0.0   |
| 21UR-100370 | 0.0    | 0.0    | 0.0      | 0.0                       | 0.0                     | 0.0   |
| 21UR-100380 | 0.0    | 0.0    | 0.0      | 0.0                       | 0.0                     | 0.0   |
| 21UR-100390 | 11.0   | 3.0    | 10.0     | 8.0                       | 5.0                     | 1.0   |
| 21UR-10040  | 0.0    | 0.0    | 0.0      | 0.0                       | 0.0                     | 0.0   |
| 21UR-100400 | 0.0    | 0.3    | 0.0      | 0.0                       | 0.0                     | 0.0   |
| 21UR-100420 | 68.0   | 10.0   | 62.0     | 27.0                      | 11.0                    | 4.3   |
| 21UR-100430 | 9.0    | 3.0    | 9.0      | 4.0                       | 5.0                     | 1.0   |

|             |       |       |       |      |       |      |
|-------------|-------|-------|-------|------|-------|------|
| 21UR-100440 | 1.0   | 1.0   | 1.0   | 0.0  | 0.0   | 0.0  |
| 21UR-100450 | 2.0   | 0.0   | 0.0   | 0.0  | 1.0   | 0.0  |
| 21UR-100460 | 0.0   | 0.0   | 0.0   | 0.0  | 0.0   | 0.0  |
| 21UR-100470 | 0.0   | 0.0   | 0.0   | 1.0  | 2.0   | 1.0  |
| 21UR-100480 | 0.0   | 0.0   | 0.0   | 0.0  | 0.0   | 0.0  |
| 21UR-100490 | 161.5 | 216.0 | 138.0 | 93.0 | 139.5 | 41.0 |
| 21UR-10050  | 70.0  | 21.7  | 65.0  | 12.0 | 49.0  | 1.0  |
| 21UR-100500 | 0.0   | 0.0   | 0.0   | 0.0  | 0.0   | 1.0  |
| 21UR-100510 | 1.0   | 1.0   | 1.0   | 0.0  | 2.0   | 0.0  |
| 21UR-100520 | 0.0   | 0.0   | 0.0   | 0.0  | 0.0   | 0.0  |
| 21UR-100530 | 0.0   | 0.0   | 0.0   | 0.0  | 0.0   | 0.0  |
| 21UR-100540 | 0.0   | 0.0   | 0.0   | 0.0  | 0.0   | 0.0  |
| 21UR-100550 | 0.0   | 0.1   | 0.0   | 1.0  | 0.0   | 0.0  |
| 21UR-100560 | 0.0   | 0.0   | 0.0   | 0.0  | 0.0   | 0.0  |
| 21UR-100570 | 125.5 | 9.1   | 98.0  | 56.0 | 17.0  | 0.0  |
| 21UR-100580 | 0.0   | 0.0   | 0.0   | 0.0  | 0.0   | 0.0  |
| 21UR-100590 | 0.0   | 0.0   | 1.0   | 2.0  | 0.0   | 0.0  |
| 21UR-10060  | 0.0   | 0.0   | 0.0   | 1.0  | 1.0   | 1.0  |
| 21UR-100600 | 1.0   | 4.0   | 2.0   | 1.0  | 2.0   | 0.0  |
| 21UR-100610 | 0.0   | 0.0   | 0.0   | 0.0  | 0.0   | 0.0  |
| 21UR-100620 | 0.0   | 4.0   | 0.0   | 0.0  | 2.0   | 0.0  |
| 21UR-100630 | 4.0   | 5.0   | 0.0   | 2.0  | 3.0   | 0.0  |
| 21UR-100640 | 1.0   | 0.0   | 0.0   | 0.0  | 0.0   | 0.0  |
| 21UR-100650 | 0.0   | 0.0   | 0.0   | 0.0  | 1.0   | 0.0  |
| 21UR-100660 | 1.0   | 0.0   | 1.0   | 0.0  | 4.0   | 0.0  |
| 21UR-100670 | 3.0   | 2.0   | 2.0   | 0.0  | 0.0   | 0.0  |
| 21UR-100680 | 12.0  | 17.0  | 10.0  | 8.0  | 28.0  | 0.0  |
| 21UR-100690 | 0.0   | 0.0   | 0.0   | 0.0  | 2.0   | 0.0  |
| 21UR-10070  | 0.0   | 4.0   | 0.0   | 0.0  | 0.0   | 0.0  |
| 21UR-100700 | 1.0   | 3.0   | 1.0   | 0.0  | 1.0   | 0.0  |
| 21UR-100710 | 1.0   | 0.0   | 1.0   | 0.0  | 0.0   | 0.0  |
| 21UR-100720 | 9.0   | 6.0   | 5.0   | 4.0  | 10.0  | 2.0  |
| 21UR-100730 | 0.0   | 2.0   | 0.0   | 0.0  | 0.0   | 0.0  |
| 21UR-100740 | 0.0   | 14.0  | 0.0   | 2.0  | 2.0   | 0.0  |
| 21UR-100750 | 4.0   | 5.0   | 6.0   | 2.0  | 6.0   | 0.0  |
| 21UR-100760 | 0.0   | 0.0   | 0.0   | 0.0  | 0.0   | 0.0  |
| 21UR-100770 | 0.0   | 0.0   | 0.0   | 0.0  | 0.0   | 0.0  |
| 21UR-100780 | 13.0  | 1.0   | 13.0  | 0.0  | 4.0   | 0.0  |
| 21UR-100790 | 1.0   | 0.1   | 0.0   | 0.0  | 0.0   | 0.0  |
| 21UR-10080  | 0.0   | 1.5   | 4.0   | 0.0  | 1.0   | 0.0  |
| 21UR-100800 | 2.0   | 2.0   | 3.0   | 2.0  | 9.0   | 0.0  |
| 21UR-100810 | 0.0   | 0.0   | 0.0   | 0.0  | 0.0   | 0.0  |
| 21UR-100820 | 0.0   | 0.0   | 0.0   | 0.0  | 0.0   | 0.0  |
| 21UR-100830 | 0.0   | 0.0   | 0.0   | 0.0  | 0.0   | 0.0  |
| 21UR-100840 | 0.0   | 0.0   | 1.0   | 0.0  | 0.0   | 0.0  |
| 21UR-100850 | 0.0   | 0.0   | 0.0   | 0.0  | 0.0   | 0.0  |
| 21UR-100860 | 0.0   | 0.0   | 0.0   | 0.0  | 0.0   | 0.0  |
| 21UR-100870 | 0.0   | 0.0   | 0.0   | 0.0  | 0.0   | 0.0  |
| 21UR-100880 | 0.0   | 0.0   | 0.0   | 0.0  | 0.0   | 0.0  |
| 21UR-100890 | 0.0   | 0.0   | 0.0   | 0.0  | 0.0   | 0.0  |
| 21UR-10090  | 16.0  | 12.0  | 24.0  | 9.0  | 13.1  | 12.0 |

|             |       |      |       |      |      |     |
|-------------|-------|------|-------|------|------|-----|
| 21UR-100910 | 0.0   | 0.0  | 0.0   | 0.0  | 0.0  | 0.0 |
| 21UR-100920 | 0.0   | 0.0  | 0.0   | 0.0  | 0.0  | 0.0 |
| 21UR-100930 | 3.0   | 0.0  | 10.0  | 4.0  | 0.0  | 0.0 |
| 21UR-100940 | 0.0   | 0.0  | 0.0   | 0.0  | 0.0  | 0.0 |
| 21UR-100950 | 0.0   | 0.0  | 0.0   | 0.0  | 0.0  | 0.0 |
| 21UR-100960 | 1.0   | 0.0  | 0.0   | 0.0  | 0.0  | 0.0 |
| 21UR-100970 | 0.0   | 0.0  | 0.0   | 0.0  | 0.0  | 0.0 |
| 21UR-100980 | 0.0   | 0.0  | 0.0   | 0.0  | 0.0  | 0.0 |
| 21UR-100990 | 6.0   | 1.0  | 2.0   | 0.0  | 0.0  | 0.0 |
| 21UR-1010   | 9.0   | 0.0  | 5.0   | 2.0  | 4.0  | 0.0 |
| 21UR-10100  | 55.3  | 45.0 | 62.7  | 24.0 | 17.0 | 4.0 |
| 21UR-101000 | 0.0   | 1.0  | 0.0   | 0.0  | 0.0  | 0.0 |
| 21UR-101010 | 0.0   | 0.0  | 0.0   | 0.0  | 0.0  | 0.0 |
| 21UR-101020 | 0.0   | 0.0  | 0.0   | 0.0  | 0.0  | 0.0 |
| 21UR-101030 | 0.0   | 0.0  | 0.0   | 0.0  | 0.0  | 0.0 |
| 21UR-101040 | 0.0   | 0.0  | 0.0   | 0.0  | 0.0  | 0.0 |
| 21UR-101050 | 0.0   | 0.0  | 0.0   | 0.0  | 0.0  | 0.0 |
| 21UR-101060 | 1.0   | 1.0  | 0.0   | 1.0  | 1.0  | 0.0 |
| 21UR-101070 | 0.0   | 0.0  | 0.0   | 0.0  | 0.0  | 0.0 |
| 21UR-101080 | 0.0   | 0.0  | 0.0   | 0.0  | 0.0  | 0.0 |
| 21UR-101090 | 0.0   | 0.0  | 0.0   | 1.0  | 0.0  | 0.0 |
| 21UR-10110  | 210.0 | 16.0 | 199.0 | 21.0 | 9.0  | 3.0 |
| 21UR-101100 | 0.0   | 0.0  | 0.0   | 0.0  | 0.0  | 0.0 |
| 21UR-101110 | 0.0   | 0.0  | 0.0   | 0.0  | 0.0  | 0.0 |
| 21UR-101120 | 0.0   | 0.0  | 1.0   | 0.0  | 0.0  | 0.0 |
| 21UR-101130 | 8.0   | 1.0  | 2.0   | 0.0  | 4.0  | 0.0 |
| 21UR-101140 | 0.0   | 0.0  | 0.0   | 0.0  | 0.0  | 0.0 |
| 21UR-101150 | 0.1   | 0.3  | 0.0   | 0.0  | 0.0  | 0.2 |
| 21UR-101160 | 0.0   | 0.0  | 0.0   | 1.0  | 0.0  | 0.0 |
| 21UR-101170 | 0.0   | 0.0  | 0.0   | 0.0  | 0.0  | 0.0 |
| 21UR-101180 | 0.0   | 0.0  | 0.0   | 0.0  | 0.0  | 0.0 |
| 21UR-101190 | 0.0   | 0.0  | 0.0   | 0.0  | 0.0  | 0.0 |
| 21UR-10120  | 1.0   | 3.0  | 1.0   | 0.0  | 0.0  | 0.0 |
| 21UR-101200 | 0.0   | 0.0  | 0.0   | 0.0  | 0.0  | 0.0 |
| 21UR-101210 | 0.0   | 0.3  | 0.0   | 0.0  | 0.0  | 0.0 |
| 21UR-101220 | 0.0   | 0.0  | 0.0   | 0.0  | 0.0  | 0.0 |
| 21UR-101230 | 0.0   | 0.0  | 0.0   | 0.0  | 0.0  | 0.0 |
| 21UR-101240 | 0.0   | 0.0  | 0.0   | 1.0  | 0.0  | 0.0 |
| 21UR-101250 | 0.0   | 0.0  | 0.0   | 0.0  | 0.0  | 0.0 |
| 21UR-101260 | 4.0   | 7.0  | 4.0   | 2.0  | 9.0  | 1.0 |
| 21UR-101270 | 0.0   | 0.0  | 0.0   | 0.0  | 1.0  | 1.0 |
| 21UR-101280 | 0.0   | 0.0  | 0.0   | 0.0  | 0.0  | 0.0 |
| 21UR-101290 | 0.0   | 0.0  | 0.0   | 0.0  | 0.0  | 0.0 |
| 21UR-10130  | 1.0   | 0.0  | 0.0   | 0.0  | 0.0  | 0.0 |
| 21UR-101300 | 0.0   | 0.0  | 0.0   | 0.0  | 0.0  | 0.0 |
| 21UR-101310 | 0.0   | 0.0  | 0.0   | 0.0  | 1.0  | 0.0 |
| 21UR-101320 | 0.0   | 0.0  | 0.0   | 0.0  | 0.0  | 0.0 |
| 21UR-101340 | 0.0   | 0.0  | 0.0   | 0.0  | 0.0  | 0.0 |
| 21UR-101350 | 1.0   | 0.0  | 0.0   | 0.0  | 0.0  | 0.0 |
| 21UR-101360 | 1.0   | 0.0  | 1.0   | 0.0  | 3.0  | 1.0 |
| 21UR-101370 | 4.0   | 0.0  | 1.0   | 1.0  | 1.0  | 1.0 |

|             |       |       |       |      |       |      |
|-------------|-------|-------|-------|------|-------|------|
| 21UR-101380 | 1.0   | 2.0   | 0.0   | 0.0  | 20.0  | 0.0  |
| 21UR-101390 | 0.0   | 0.0   | 0.0   | 0.0  | 0.0   | 0.0  |
| 21UR-10140  | 0.0   | 0.0   | 1.0   | 0.0  | 0.0   | 0.0  |
| 21UR-101400 | 0.0   | 0.0   | 0.0   | 0.0  | 0.0   | 0.0  |
| 21UR-101410 | 0.0   | 0.0   | 0.0   | 0.0  | 0.0   | 0.0  |
| 21UR-101420 | 142.0 | 100.5 | 121.5 | 71.0 | 224.8 | 22.0 |
| 21UR-101430 | 1.0   | 1.0   | 2.0   | 0.0  | 1.0   | 1.0  |
| 21UR-101440 | 34.0  | 3.0   | 30.0  | 7.0  | 7.0   | 0.0  |
| 21UR-101450 | 27.0  | 4.0   | 22.0  | 7.0  | 16.0  | 1.0  |
| 21UR-101460 | 0.0   | 0.0   | 0.0   | 0.0  | 0.0   | 0.0  |
| 21UR-101470 | 9.0   | 18.0  | 4.0   | 1.0  | 6.0   | 0.0  |
| 21UR-101480 | 11.0  | 34.0  | 15.0  | 2.0  | 29.0  | 3.0  |
| 21UR-101490 | 0.0   | 3.0   | 0.0   | 0.0  | 0.0   | 0.0  |
| 21UR-10150  | 0.0   | 0.0   | 0.0   | 0.0  | 0.0   | 0.0  |
| 21UR-101500 | 0.0   | 0.0   | 0.0   | 0.0  | 0.0   | 0.0  |
| 21UR-101510 | 1.0   | 0.1   | 4.0   | 0.0  | 0.0   | 0.0  |
| 21UR-101520 | 47.0  | 2.0   | 27.0  | 12.0 | 4.0   | 0.0  |
| 21UR-101530 | 0.0   | 0.0   | 0.0   | 0.0  | 0.0   | 0.0  |
| 21UR-101540 | 6.0   | 0.0   | 0.0   | 0.0  | 1.2   | 0.0  |
| 21UR-101550 | 0.0   | 0.0   | 1.0   | 0.0  | 1.0   | 0.0  |
| 21UR-101560 | 0.0   | 0.0   | 0.0   | 0.0  | 0.0   | 0.0  |
| 21UR-101570 | 0.0   | 0.0   | 0.0   | 0.0  | 0.0   | 1.0  |
| 21UR-101580 | 0.0   | 1.0   | 0.0   | 0.0  | 0.0   | 0.0  |
| 21UR-101590 | 0.0   | 0.0   | 0.0   | 0.0  | 0.0   | 0.0  |
| 21UR-10160  | 218.0 | 223.5 | 177.0 | 97.0 | 173.0 | 37.5 |
| 21UR-101600 | 0.0   | 1.0   | 0.0   | 0.0  | 0.0   | 0.0  |
| 21UR-101610 | 0.0   | 0.0   | 0.0   | 0.0  | 0.0   | 0.0  |
| 21UR-101620 | 0.0   | 1.0   | 0.0   | 0.0  | 0.0   | 0.0  |
| 21UR-101630 | 0.0   | 0.0   | 0.0   | 0.0  | 0.0   | 0.0  |
| 21UR-101640 | 0.0   | 0.0   | 0.0   | 0.0  | 0.0   | 0.0  |
| 21UR-101650 | 0.0   | 0.0   | 1.0   | 0.0  | 0.0   | 0.0  |
| 21UR-101660 | 0.0   | 0.0   | 0.0   | 0.0  | 0.0   | 0.0  |
| 21UR-101670 | 0.0   | 0.0   | 0.0   | 0.0  | 0.0   | 0.0  |
| 21UR-101680 | 0.0   | 0.0   | 0.0   | 0.0  | 0.0   | 0.0  |
| 21UR-101690 | 0.0   | 0.0   | 1.0   | 0.0  | 0.0   | 0.0  |
| 21UR-10170  | 18.0  | 46.0  | 42.0  | 16.0 | 52.0  | 6.0  |
| 21UR-101700 | 0.0   | 0.0   | 0.0   | 0.0  | 0.0   | 0.0  |
| 21UR-101710 | 18.0  | 0.0   | 12.0  | 8.0  | 0.0   | 0.0  |
| 21UR-101720 | 0.0   | 0.0   | 0.0   | 0.0  | 0.0   | 0.0  |
| 21UR-101730 | 0.0   | 0.0   | 0.0   | 0.0  | 0.0   | 0.0  |
| 21UR-101740 | 0.0   | 0.0   | 0.0   | 0.0  | 0.0   | 0.0  |
| 21UR-101750 | 0.0   | 0.0   | 0.0   | 0.0  | 0.0   | 1.0  |
| 21UR-101760 | 0.0   | 0.0   | 0.0   | 0.0  | 0.0   | 0.0  |
| 21UR-101770 | 1.0   | 0.0   | 0.0   | 0.0  | 0.0   | 0.0  |
| 21UR-101790 | 4.0   | 0.0   | 0.0   | 1.0  | 0.0   | 0.0  |
| 21UR-10180  | 8.0   | 4.0   | 4.0   | 6.0  | 2.0   | 1.0  |
| 21UR-101800 | 1.0   | 2.0   | 4.0   | 0.0  | 6.0   | 0.0  |
| 21UR-101810 | 0.0   | 0.0   | 0.0   | 0.0  | 0.0   | 0.0  |
| 21UR-101830 | 0.0   | 0.0   | 0.0   | 0.0  | 1.0   | 0.0  |
| 21UR-101840 | 0.0   | 1.0   | 0.0   | 0.0  | 0.0   | 0.0  |
| 21UR-101850 | 0.0   | 0.0   | 0.0   | 0.0  | 0.0   | 0.0  |



|             |        |       |        |        |       |      |
|-------------|--------|-------|--------|--------|-------|------|
| 21UR-101860 | 0.0    | 0.0   | 0.0    | 0.0    | 0.0   | 0.0  |
| 21UR-101870 | 0.0    | 0.0   | 1.0    | 0.0    | 2.0   | 0.0  |
| 21UR-101880 | 0.0    | 0.0   | 0.0    | 0.0    | 0.0   | 0.0  |
| 21UR-101890 | 0.0    | 0.0   | 0.0    | 0.0    | 0.0   | 0.0  |
| 21UR-10190  | 0.0    | 0.0   | 0.0    | 0.0    | 0.0   | 0.0  |
| 21UR-101900 | 0.0    | 0.0   | 0.0    | 0.0    | 0.0   | 1.0  |
| 21UR-101910 | 0.0    | 0.0   | 0.0    | 0.0    | 0.0   | 0.0  |
| 21UR-101920 | 81.0   | 29.0  | 83.3   | 29.0   | 29.0  | 4.0  |
| 21UR-101930 | 6461.0 | 562.0 | 5832.0 | 2884.0 | 477.0 | 27.0 |
| 21UR-101940 | 0.0    | 0.0   | 0.0    | 0.0    | 0.0   | 0.0  |
| 21UR-101950 | 1.0    | 1.0   | 1.0    | 1.0    | 0.0   | 0.0  |
| 21UR-101960 | 0.0    | 0.0   | 0.0    | 0.0    | 0.0   | 0.0  |
| 21UR-101970 | 1.0    | 0.0   | 0.0    | 0.0    | 0.0   | 0.0  |
| 21UR-101980 | 0.0    | 0.0   | 1.0    | 0.0    | 0.0   | 0.0  |
| 21UR-101990 | 0.0    | 0.0   | 1.0    | 0.0    | 0.0   | 0.0  |
| 21UR-1020   | 15.0   | 1.0   | 19.0   | 4.0    | 5.3   | 0.0  |
| 21UR-10200  | 2.0    | 2.0   | 2.0    | 0.0    | 10.0  | 3.0  |
| 21UR-102000 | 0.0    | 0.0   | 0.0    | 0.0    | 0.0   | 0.0  |
| 21UR-102010 | 6.0    | 3.0   | 9.0    | 0.0    | 6.0   | 0.0  |
| 21UR-102020 | 12.0   | 0.0   | 13.0   | 2.0    | 4.0   | 0.0  |
| 21UR-102040 | 0.0    | 0.0   | 0.0    | 0.0    | 0.0   | 0.0  |
| 21UR-102050 | 2.0    | 5.0   | 5.0    | 2.0    | 7.0   | 0.0  |
| 21UR-102060 | 0.0    | 3.0   | 0.0    | 0.0    | 0.0   | 1.0  |
| 21UR-102070 | 11.5   | 2.5   | 19.0   | 6.0    | 9.2   | 0.0  |
| 21UR-102080 | 0.0    | 0.0   | 0.0    | 0.0    | 0.0   | 0.0  |
| 21UR-102090 | 0.0    | 0.0   | 0.0    | 0.0    | 0.0   | 0.0  |
| 21UR-10210  | 18.0   | 16.0  | 17.0   | 6.5    | 39.0  | 0.0  |
| 21UR-102100 | 0.0    | 0.0   | 0.0    | 0.0    | 0.0   | 0.0  |
| 21UR-102110 | 0.0    | 0.0   | 0.0    | 0.0    | 0.0   | 0.0  |
| 21UR-102120 | 0.0    | 0.0   | 0.0    | 0.0    | 0.0   | 0.0  |
| 21UR-102130 | 0.0    | 0.0   | 0.0    | 0.0    | 0.0   | 0.0  |
| 21UR-102140 | 0.0    | 0.0   | 0.0    | 0.0    | 0.0   | 0.0  |
| 21UR-102150 | 4.0    | 9.0   | 4.0    | 0.0    | 6.0   | 1.0  |
| 21UR-102160 | 25.0   | 4.0   | 11.0   | 4.0    | 2.0   | 0.0  |
| 21UR-102170 | 6.0    | 1.0   | 10.0   | 0.0    | 0.0   | 0.0  |
| 21UR-102180 | 4.0    | 0.0   | 6.0    | 0.0    | 6.0   | 0.0  |
| 21UR-102190 | 1.0    | 0.0   | 0.0    | 0.0    | 0.0   | 0.0  |
| 21UR-10220  | 6.0    | 7.0   | 8.0    | 6.0    | 28.0  | 3.0  |
| 21UR-102200 | 1.0    | 0.0   | 0.0    | 0.0    | 0.0   | 0.0  |
| 21UR-102210 | 0.0    | 0.0   | 0.3    | 0.0    | 0.0   | 1.0  |
| 21UR-102220 | 0.0    | 0.0   | 0.0    | 0.0    | 0.0   | 0.0  |
| 21UR-102230 | 0.0    | 0.0   | 0.0    | 0.0    | 0.0   | 0.0  |
| 21UR-102240 | 0.0    | 0.0   | 0.0    | 0.0    | 0.0   | 0.0  |
| 21UR-102250 | 8.0    | 29.0  | 11.0   | 4.0    | 19.3  | 3.0  |
| 21UR-102260 | 2.5    | 1.5   | 9.0    | 1.0    | 8.5   | 0.0  |
| 21UR-102280 | 0.0    | 1.0   | 0.0    | 0.0    | 0.0   | 1.0  |
| 21UR-102290 | 0.0    | 0.0   | 0.0    | 0.0    | 0.0   | 0.0  |
| 21UR-10230  | 1.0    | 12.0  | 4.0    | 4.0    | 36.0  | 0.0  |
| 21UR-102300 | 0.0    | 1.0   | 0.0    | 0.0    | 0.0   | 0.0  |
| 21UR-102310 | 0.0    | 0.0   | 0.0    | 0.0    | 1.0   | 0.0  |
| 21UR-102320 | 14.0   | 15.0  | 6.0    | 5.0    | 16.0  | 0.0  |

|             |       |      |       |       |       |     |
|-------------|-------|------|-------|-------|-------|-----|
| 21UR-102330 | 56.0  | 72.0 | 97.0  | 42.0  | 122.0 | 1.0 |
| 21UR-102340 | 0.0   | 0.0  | 0.0   | 0.0   | 0.0   | 0.0 |
| 21UR-102350 | 0.0   | 0.0  | 0.0   | 0.0   | 0.0   | 0.0 |
| 21UR-102360 | 0.0   | 0.0  | 1.0   | 0.0   | 0.0   | 0.0 |
| 21UR-102370 | 0.0   | 0.0  | 0.0   | 0.0   | 0.0   | 0.0 |
| 21UR-102380 | 0.0   | 0.0  | 0.0   | 0.0   | 0.0   | 0.0 |
| 21UR-102390 | 1.5   | 0.0  | 2.0   | 1.0   | 1.0   | 0.0 |
| 21UR-10240  | 0.0   | 1.0  | 0.0   | 0.0   | 0.0   | 0.0 |
| 21UR-102400 | 0.0   | 0.0  | 0.0   | 0.0   | 1.0   | 0.0 |
| 21UR-102410 | 0.0   | 1.0  | 0.0   | 0.0   | 0.0   | 0.0 |
| 21UR-102420 | 0.0   | 0.0  | 0.0   | 0.0   | 0.0   | 0.0 |
| 21UR-102430 | 1.0   | 0.0  | 0.0   | 0.0   | 0.0   | 0.0 |
| 21UR-102440 | 0.0   | 0.0  | 1.0   | 1.0   | 0.0   | 0.0 |
| 21UR-102450 | 3.0   | 1.0  | 4.0   | 2.0   | 2.0   | 0.0 |
| 21UR-102460 | 0.0   | 0.0  | 0.0   | 0.0   | 0.0   | 0.0 |
| 21UR-102470 | 132.0 | 16.0 | 109.0 | 58.0  | 27.0  | 5.0 |
| 21UR-102480 | 0.0   | 0.0  | 1.0   | 0.0   | 1.0   | 0.0 |
| 21UR-102490 | 0.0   | 1.0  | 4.0   | 0.0   | 0.0   | 0.0 |
| 21UR-10250  | 108.0 | 92.0 | 161.0 | 67.0  | 180.0 | 1.0 |
| 21UR-102500 | 6.0   | 1.0  | 10.0  | 1.0   | 1.0   | 0.0 |
| 21UR-102520 | 6.0   | 22.2 | 6.0   | 1.0   | 19.3  | 0.0 |
| 21UR-102530 | 0.0   | 0.0  | 0.0   | 0.0   | 0.0   | 0.0 |
| 21UR-102540 | 9.0   | 8.1  | 6.0   | 3.0   | 2.0   | 0.0 |
| 21UR-102550 | 0.0   | 0.0  | 1.0   | 0.0   | 0.0   | 0.0 |
| 21UR-102560 | 6.0   | 3.0  | 2.0   | 3.0   | 5.0   | 0.0 |
| 21UR-102570 | 0.0   | 0.0  | 0.0   | 0.0   | 0.0   | 0.0 |
| 21UR-102580 | 0.0   | 0.0  | 1.0   | 0.0   | 1.0   | 0.0 |
| 21UR-102590 | 0.0   | 0.0  | 0.0   | 0.0   | 4.0   | 0.0 |
| 21UR-10260  | 0.0   | 0.0  | 0.0   | 0.0   | 0.0   | 0.0 |
| 21UR-102600 | 1.0   | 2.0  | 3.0   | 0.0   | 2.0   | 1.0 |
| 21UR-102610 | 37.0  | 12.0 | 27.0  | 6.5   | 12.0  | 3.0 |
| 21UR-102620 | 0.0   | 0.0  | 2.0   | 0.0   | 1.0   | 0.0 |
| 21UR-102630 | 0.0   | 0.0  | 1.0   | 0.0   | 0.0   | 0.0 |
| 21UR-102640 | 4.0   | 0.0  | 4.0   | 0.0   | 1.0   | 1.0 |
| 21UR-102650 | 5.0   | 0.0  | 1.0   | 0.0   | 0.0   | 0.0 |
| 21UR-102660 | 1.0   | 0.0  | 0.0   | 0.0   | 1.0   | 0.0 |
| 21UR-102670 | 0.0   | 1.0  | 0.0   | 0.0   | 2.0   | 0.0 |
| 21UR-102680 | 21.0  | 9.0  | 13.0  | 5.5   | 17.0  | 0.0 |
| 21UR-102690 | 0.0   | 0.0  | 0.0   | 0.0   | 0.0   | 0.0 |
| 21UR-10270  | 9.0   | 4.0  | 11.0  | 0.0   | 6.0   | 0.0 |
| 21UR-102700 | 0.0   | 0.0  | 0.0   | 0.0   | 0.0   | 0.0 |
| 21UR-102710 | 0.0   | 0.0  | 0.0   | 0.0   | 0.0   | 0.0 |
| 21UR-102730 | 1.0   | 3.0  | 0.0   | 0.0   | 10.5  | 1.0 |
| 21UR-102740 | 37.0  | 36.0 | 27.0  | 7.0   | 25.0  | 6.0 |
| 21UR-102750 | 312.0 | 21.0 | 247.2 | 137.0 | 161.0 | 2.0 |
| 21UR-102760 | 16.0  | 4.0  | 5.0   | 5.0   | 8.0   | 0.0 |
| 21UR-102770 | 1.0   | 0.0  | 1.0   | 0.0   | 0.0   | 0.0 |
| 21UR-102780 | 6.0   | 0.0  | 6.0   | 0.0   | 0.0   | 0.0 |
| 21UR-102790 | 0.0   | 0.0  | 1.0   | 0.0   | 0.0   | 0.0 |
| 21UR-10280  | 0.0   | 1.0  | 0.0   | 0.0   | 1.0   | 0.0 |
| 21UR-102800 | 0.0   | 0.0  | 0.0   | 0.0   | 0.0   | 0.0 |

|             |        |       |        |        |       |      |
|-------------|--------|-------|--------|--------|-------|------|
| 21UR-102810 | 4.0    | 12.0  | 3.0    | 1.0    | 14.3  | 3.0  |
| 21UR-102820 | 0.0    | 0.0   | 0.0    | 0.0    | 0.0   | 0.0  |
| 21UR-102830 | 0.0    | 1.0   | 0.0    | 0.0    | 0.0   | 1.0  |
| 21UR-102840 | 9.0    | 0.0   | 10.0   | 0.0    | 0.0   | 0.0  |
| 21UR-102850 | 0.0    | 1.0   | 0.0    | 0.0    | 2.0   | 0.0  |
| 21UR-102860 | 0.0    | 0.0   | 0.0    | 0.0    | 2.0   | 0.0  |
| 21UR-102870 | 0.0    | 0.0   | 0.0    | 0.0    | 0.0   | 0.0  |
| 21UR-102890 | 4.0    | 0.0   | 1.0    | 0.0    | 0.0   | 0.0  |
| 21UR-10290  | 0.0    | 1.0   | 0.0    | 0.0    | 0.0   | 0.0  |
| 21UR-102900 | 0.0    | 0.0   | 0.0    | 0.0    | 1.0   | 0.0  |
| 21UR-102910 | 0.0    | 1.0   | 0.0    | 0.0    | 1.0   | 0.0  |
| 21UR-102920 | 1.0    | 1.0   | 0.0    | 0.0    | 4.0   | 0.0  |
| 21UR-102930 | 0.0    | 0.3   | 0.0    | 0.0    | 0.0   | 0.0  |
| 21UR-102940 | 0.0    | 0.0   | 0.0    | 0.0    | 0.0   | 0.0  |
| 21UR-102950 | 0.0    | 6.0   | 1.0    | 0.0    | 5.0   | 0.0  |
| 21UR-102960 | 0.0    | 0.0   | 0.0    | 0.0    | 0.0   | 0.0  |
| 21UR-102970 | 0.0    | 0.0   | 0.0    | 0.0    | 0.0   | 0.0  |
| 21UR-102980 | 0.0    | 1.0   | 0.0    | 0.0    | 0.0   | 0.0  |
| 21UR-102990 | 0.0    | 0.0   | 0.0    | 0.0    | 0.0   | 0.0  |
| 21UR-1030   | 6.0    | 2.0   | 1.0    | 1.0    | 0.0   | 1.0  |
| 21UR-10300  | 58.0   | 16.0  | 37.7   | 11.0   | 15.5  | 0.0  |
| 21UR-103000 | 0.0    | 0.0   | 0.0    | 0.0    | 0.0   | 0.0  |
| 21UR-103010 | 0.0    | 0.0   | 0.0    | 0.0    | 1.0   | 0.0  |
| 21UR-103020 | 0.0    | 0.0   | 0.0    | 0.0    | 0.0   | 0.0  |
| 21UR-103030 | 0.0    | 0.0   | 0.0    | 0.0    | 0.0   | 0.0  |
| 21UR-103040 | 0.0    | 0.0   | 0.0    | 0.0    | 0.0   | 0.0  |
| 21UR-103050 | 1.0    | 0.0   | 0.0    | 0.0    | 0.0   | 0.0  |
| 21UR-103060 | 6.0    | 3.0   | 0.0    | 0.0    | 10.0  | 2.0  |
| 21UR-103070 | 0.0    | 0.0   | 0.0    | 0.0    | 0.0   | 1.0  |
| 21UR-103080 | 20.0   | 19.0  | 25.0   | 5.0    | 35.0  | 3.0  |
| 21UR-103090 | 0.0    | 0.0   | 0.0    | 0.0    | 0.0   | 0.0  |
| 21UR-10310  | 0.0    | 0.0   | 0.0    | 1.0    | 0.0   | 0.0  |
| 21UR-103100 | 0.0    | 0.1   | 0.0    | 0.0    | 0.0   | 0.0  |
| 21UR-103110 | 0.0    | 0.0   | 0.0    | 0.0    | 0.0   | 0.0  |
| 21UR-103120 | 0.0    | 0.0   | 1.0    | 0.0    | 0.0   | 0.0  |
| 21UR-103130 | 1.0    | 0.0   | 0.0    | 0.0    | 0.0   | 0.0  |
| 21UR-103160 | 0.0    | 0.0   | 0.0    | 0.0    | 0.0   | 0.0  |
| 21UR-103170 | 0.0    | 0.0   | 1.0    | 0.0    | 1.0   | 0.0  |
| 21UR-103180 | 1.0    | 0.0   | 1.0    | 0.0    | 1.0   | 0.0  |
| 21UR-103190 | 43.0   | 72.0  | 30.5   | 17.0   | 41.0  | 2.0  |
| 21UR-10320  | 6.0    | 0.0   | 6.0    | 1.0    | 0.0   | 1.0  |
| 21UR-103200 | 0.0    | 0.0   | 0.0    | 0.0    | 0.0   | 0.0  |
| 21UR-103210 | 0.0    | 0.0   | 0.0    | 0.0    | 0.0   | 0.0  |
| 21UR-103220 | 0.0    | 0.0   | 0.0    | 0.0    | 0.0   | 0.0  |
| 21UR-103240 | 2020.0 | 335.0 | 1870.5 | 1229.5 | 516.5 | 55.0 |
| 21UR-103250 | 34.0   | 1.0   | 24.0   | 5.0    | 5.0   | 0.0  |
| 21UR-103260 | 0.0    | 0.0   | 0.0    | 0.0    | 0.0   | 0.0  |
| 21UR-103270 | 3.0    | 2.0   | 1.0    | 0.0    | 1.0   | 0.0  |
| 21UR-103280 | 0.0    | 0.0   | 0.0    | 0.0    | 0.0   | 0.0  |
| 21UR-103290 | 0.0    | 0.0   | 0.0    | 0.0    | 0.0   | 0.0  |
| 21UR-10330  | 0.0    | 0.0   | 0.0    | 0.0    | 0.0   | 0.0  |

|             |        |        |        |        |        |       |
|-------------|--------|--------|--------|--------|--------|-------|
| 21UR-103310 | 0.0    | 0.0    | 0.0    | 0.0    | 0.0    | 0.0   |
| 21UR-103320 | 0.0    | 0.0    | 0.0    | 0.0    | 0.0    | 0.0   |
| 21UR-103330 | 14.0   | 9.0    | 11.0   | 13.0   | 19.0   | 7.0   |
| 21UR-103340 | 373.0  | 97.4   | 380.0  | 251.0  | 147.0  | 12.0  |
| 21UR-103350 | 0.0    | 0.0    | 0.0    | 1.0    | 0.0    | 0.0   |
| 21UR-103360 | 0.0    | 0.0    | 0.0    | 0.0    | 0.0    | 0.0   |
| 21UR-103370 | 10.0   | 6.0    | 15.0   | 7.0    | 18.0   | 0.0   |
| 21UR-103380 | 0.0    | 0.0    | 0.0    | 0.0    | 0.0    | 0.0   |
| 21UR-103390 | 28.0   | 1.0    | 27.0   | 30.0   | 0.0    | 0.0   |
| 21UR-10340  | 0.0    | 0.0    | 0.0    | 0.0    | 0.0    | 1.0   |
| 21UR-103400 | 4.0    | 0.1    | 1.0    | 1.0    | 0.0    | 0.0   |
| 21UR-103410 | 0.0    | 0.0    | 0.0    | 0.0    | 0.0    | 0.0   |
| 21UR-103420 | 0.0    | 0.0    | 0.0    | 1.0    | 0.0    | 0.0   |
| 21UR-103430 | 0.0    | 0.0    | 0.0    | 1.0    | 2.0    | 0.0   |
| 21UR-103440 | 0.0    | 0.0    | 0.0    | 0.0    | 0.0    | 0.0   |
| 21UR-103450 | 0.0    | 0.0    | 1.0    | 0.0    | 2.0    | 0.0   |
| 21UR-103460 | 0.0    | 0.0    | 0.0    | 0.0    | 0.0    | 0.0   |
| 21UR-103470 | 0.0    | 0.0    | 0.0    | 0.0    | 0.0    | 0.0   |
| 21UR-103480 | 2.0    | 0.0    | 0.0    | 1.0    | 0.0    | 0.0   |
| 21UR-103490 | 0.0    | 0.0    | 0.0    | 0.0    | 0.0    | 0.0   |
| 21UR-10350  | 0.0    | 0.0    | 0.0    | 0.0    | 0.0    | 0.0   |
| 21UR-103500 | 0.0    | 0.0    | 0.0    | 0.0    | 0.0    | 0.0   |
| 21UR-103510 | 0.0    | 0.0    | 0.0    | 0.0    | 0.0    | 0.0   |
| 21UR-103520 | 0.0    | 0.0    | 0.0    | 0.0    | 0.0    | 0.0   |
| 21UR-103530 | 6.0    | 0.5    | 5.5    | 7.0    | 0.0    | 0.0   |
| 21UR-103540 | 0.0    | 0.0    | 0.0    | 0.0    | 0.0    | 0.0   |
| 21UR-103550 | 0.0    | 0.0    | 0.0    | 0.0    | 0.0    | 0.0   |
| 21UR-103560 | 0.0    | 0.0    | 0.0    | 0.0    | 0.0    | 0.0   |
| 21UR-103570 | 1.0    | 0.0    | 0.0    | 0.0    | 0.0    | 0.0   |
| 21UR-103580 | 0.0    | 0.0    | 0.0    | 0.0    | 0.0    | 0.0   |
| 21UR-103590 | 0.0    | 0.0    | 0.0    | 0.0    | 0.0    | 0.0   |
| 21UR-10360  | 1.0    | 0.0    | 4.0    | 0.0    | 0.0    | 0.0   |
| 21UR-103600 | 6.0    | 0.0    | 0.0    | 0.0    | 0.0    | 0.0   |
| 21UR-103610 | 0.0    | 0.0    | 0.0    | 1.0    | 0.0    | 0.0   |
| 21UR-103620 | 0.0    | 0.0    | 0.0    | 0.0    | 0.0    | 0.0   |
| 21UR-103630 | 16.0   | 1.0    | 13.0   | 3.0    | 8.8    | 0.0   |
| 21UR-103640 | 0.0    | 0.0    | 0.0    | 0.0    | 0.0    | 0.0   |
| 21UR-103650 | 0.0    | 0.0    | 0.0    | 0.0    | 0.0    | 0.0   |
| 21UR-103660 | 0.0    | 0.0    | 0.0    | 0.0    | 0.0    | 0.0   |
| 21UR-103670 | 0.0    | 0.0    | 0.0    | 0.0    | 0.0    | 0.0   |
| 21UR-103680 | 0.0    | 0.0    | 0.0    | 0.0    | 0.0    | 0.0   |
| 21UR-103690 | 0.0    | 0.0    | 0.0    | 0.0    | 0.0    | 0.0   |
| 21UR-10370  | 0.0    | 0.0    | 0.0    | 0.0    | 0.0    | 0.0   |
| 21UR-103700 | 10.0   | 5.0    | 11.0   | 9.0    | 11.0   | 0.0   |
| 21UR-103710 | 0.0    | 0.0    | 0.0    | 0.0    | 0.0    | 0.0   |
| 21UR-103720 | 0.0    | 1.0    | 1.0    | 0.0    | 0.0    | 0.0   |
| 21UR-103730 | 24.0   | 13.0   | 22.0   | 7.0    | 8.0    | 2.0   |
| 21UR-103740 | 5830.0 | 2551.0 | 4657.3 | 2022.6 | 1690.8 | 263.0 |
| 21UR-103750 | 0.0    | 0.0    | 0.0    | 0.0    | 0.0    | 0.0   |
| 21UR-103760 | 0.0    | 0.0    | 0.0    | 0.0    | 0.0    | 0.0   |
| 21UR-103770 | 0.0    | 0.0    | 0.0    | 0.0    | 1.0    | 0.0   |

|             |      |      |      |      |      |     |
|-------------|------|------|------|------|------|-----|
| 21UR-103780 | 0.0  | 0.0  | 0.0  | 0.0  | 0.0  | 0.0 |
| 21UR-103790 | 0.0  | 0.0  | 0.0  | 0.0  | 1.0  | 0.0 |
| 21UR-10380  | 0.0  | 1.0  | 3.0  | 1.0  | 0.0  | 1.0 |
| 21UR-103800 | 0.0  | 0.0  | 0.0  | 0.0  | 9.0  | 0.0 |
| 21UR-103810 | 0.0  | 0.0  | 0.0  | 0.0  | 0.0  | 0.0 |
| 21UR-103820 | 0.0  | 0.0  | 0.0  | 0.0  | 0.0  | 0.0 |
| 21UR-103830 | 0.0  | 0.0  | 4.0  | 0.0  | 0.0  | 0.0 |
| 21UR-103840 | 0.0  | 0.0  | 0.0  | 0.0  | 0.0  | 0.0 |
| 21UR-103850 | 68.0 | 10.0 | 62.0 | 25.0 | 11.0 | 5.7 |
| 21UR-103860 | 0.0  | 0.0  | 0.0  | 0.0  | 0.0  | 0.0 |
| 21UR-103870 | 0.0  | 0.0  | 0.0  | 0.0  | 0.0  | 0.0 |
| 21UR-103880 | 0.0  | 0.0  | 0.0  | 0.0  | 0.0  | 0.0 |
| 21UR-103890 | 0.0  | 1.0  | 0.0  | 0.0  | 0.0  | 0.0 |
| 21UR-10390  | 0.0  | 0.0  | 0.0  | 0.0  | 0.0  | 0.0 |
| 21UR-103900 | 0.0  | 0.0  | 0.0  | 1.0  | 1.0  | 0.0 |
| 21UR-103910 | 0.0  | 0.0  | 0.0  | 0.0  | 0.0  | 0.0 |
| 21UR-103920 | 0.0  | 0.0  | 0.0  | 0.0  | 0.0  | 0.0 |
| 21UR-103930 | 8.0  | 0.0  | 8.0  | 1.0  | 1.0  | 0.0 |
| 21UR-103940 | 0.0  | 0.0  | 0.0  | 0.0  | 0.0  | 0.0 |
| 21UR-103950 | 0.0  | 0.0  | 0.0  | 0.0  | 0.0  | 0.0 |
| 21UR-103960 | 0.0  | 0.0  | 0.0  | 0.0  | 0.0  | 0.0 |
| 21UR-103970 | 0.0  | 0.0  | 0.0  | 0.0  | 0.0  | 0.0 |
| 21UR-103980 | 0.0  | 4.0  | 0.0  | 0.0  | 8.0  | 0.0 |
| 21UR-103990 | 0.0  | 0.0  | 0.0  | 0.0  | 0.0  | 0.0 |
| 21UR-1040   | 22.0 | 11.0 | 15.0 | 19.0 | 11.0 | 1.0 |
| 21UR-10400  | 0.0  | 0.0  | 0.0  | 0.0  | 0.0  | 0.0 |
| 21UR-104000 | 0.0  | 0.0  | 0.0  | 0.0  | 0.0  | 0.0 |
| 21UR-104010 | 0.0  | 2.0  | 0.0  | 0.0  | 1.0  | 0.0 |
| 21UR-104020 | 0.0  | 0.0  | 0.0  | 0.0  | 0.0  | 0.0 |
| 21UR-104030 | 0.0  | 4.0  | 2.0  | 1.0  | 2.0  | 0.0 |
| 21UR-104040 | 0.0  | 0.0  | 0.0  | 0.0  | 0.0  | 0.0 |
| 21UR-104060 | 0.0  | 0.0  | 0.0  | 0.0  | 0.0  | 0.0 |
| 21UR-104070 | 2.0  | 0.0  | 1.0  | 0.0  | 0.0  | 0.0 |
| 21UR-104080 | 1.0  | 0.0  | 4.0  | 0.0  | 0.0  | 0.0 |
| 21UR-104090 | 1.0  | 0.0  | 2.0  | 0.0  | 4.0  | 0.0 |
| 21UR-10410  | 0.0  | 0.0  | 0.0  | 0.0  | 0.0  | 0.0 |
| 21UR-104100 | 1.0  | 1.0  | 4.0  | 0.0  | 6.0  | 0.0 |
| 21UR-104110 | 1.0  | 2.0  | 0.0  | 0.0  | 1.0  | 1.0 |
| 21UR-104120 | 0.0  | 0.0  | 0.0  | 0.0  | 0.0  | 0.0 |
| 21UR-104130 | 0.0  | 0.0  | 0.0  | 0.0  | 0.0  | 0.0 |
| 21UR-104140 | 0.0  | 0.0  | 0.0  | 0.0  | 0.0  | 0.0 |
| 21UR-104150 | 0.0  | 0.0  | 0.0  | 0.0  | 0.0  | 0.0 |
| 21UR-104160 | 30.5 | 7.0  | 19.0 | 9.0  | 3.0  | 3.0 |
| 21UR-104170 | 1.0  | 0.0  | 1.0  | 0.0  | 0.0  | 0.0 |
| 21UR-104180 | 1.0  | 2.0  | 7.0  | 3.0  | 2.0  | 1.0 |
| 21UR-104190 | 48.0 | 23.0 | 43.0 | 10.0 | 17.0 | 7.0 |
| 21UR-10420  | 1.0  | 0.0  | 0.0  | 0.0  | 0.0  | 0.0 |
| 21UR-104200 | 0.0  | 0.0  | 0.0  | 0.0  | 1.0  | 0.0 |
| 21UR-104210 | 0.0  | 1.0  | 0.0  | 0.0  | 1.0  | 1.0 |
| 21UR-104220 | 1.0  | 0.0  | 1.0  | 0.0  | 0.0  | 0.0 |
| 21UR-104230 | 0.0  | 1.0  | 1.0  | 0.0  | 1.0  | 0.0 |

|             |      |      |      |      |       |     |
|-------------|------|------|------|------|-------|-----|
| 21UR-104240 | 1.0  | 0.0  | 0.0  | 0.0  | 0.0   | 0.0 |
| 21UR-104250 | 8.0  | 6.0  | 5.0  | 6.0  | 18.0  | 0.0 |
| 21UR-104260 | 0.0  | 0.0  | 0.0  | 0.0  | 0.0   | 0.0 |
| 21UR-104270 | 24.0 | 1.0  | 16.0 | 3.0  | 11.7  | 0.0 |
| 21UR-104280 | 0.0  | 0.0  | 0.0  | 0.0  | 0.0   | 0.0 |
| 21UR-104290 | 0.0  | 0.0  | 0.0  | 0.0  | 1.0   | 0.0 |
| 21UR-10430  | 0.0  | 0.0  | 0.0  | 0.0  | 0.0   | 0.0 |
| 21UR-104300 | 0.0  | 0.0  | 0.0  | 0.0  | 0.0   | 0.0 |
| 21UR-104310 | 7.0  | 3.0  | 7.0  | 3.0  | 15.0  | 2.0 |
| 21UR-104320 | 0.0  | 0.0  | 0.0  | 0.0  | 4.0   | 0.0 |
| 21UR-104330 | 0.0  | 0.0  | 0.0  | 0.0  | 0.0   | 0.0 |
| 21UR-104340 | 0.0  | 0.0  | 0.0  | 0.0  | 0.0   | 0.0 |
| 21UR-104350 | 0.0  | 0.0  | 1.0  | 0.0  | 0.0   | 0.0 |
| 21UR-104360 | 1.0  | 0.0  | 0.0  | 0.0  | 1.0   | 0.0 |
| 21UR-104370 | 0.0  | 0.0  | 0.0  | 0.0  | 0.0   | 0.0 |
| 21UR-104380 | 0.0  | 0.0  | 0.0  | 0.0  | 0.0   | 0.0 |
| 21UR-104390 | 0.0  | 0.0  | 0.0  | 0.0  | 0.0   | 3.0 |
| 21UR-10440  | 6.0  | 0.0  | 1.0  | 1.0  | 0.0   | 0.0 |
| 21UR-104400 | 18.0 | 0.0  | 10.0 | 14.0 | 6.0   | 0.0 |
| 21UR-104410 | 0.0  | 1.0  | 0.0  | 0.0  | 0.0   | 0.0 |
| 21UR-104420 | 1.0  | 0.0  | 0.0  | 0.0  | 0.0   | 0.0 |
| 21UR-104430 | 0.0  | 0.0  | 4.0  | 0.0  | 3.0   | 0.0 |
| 21UR-104440 | 0.0  | 1.0  | 0.0  | 0.0  | 0.0   | 0.0 |
| 21UR-104450 | 0.0  | 0.0  | 0.0  | 0.0  | 0.0   | 0.0 |
| 21UR-104460 | 0.0  | 0.0  | 0.0  | 0.0  | 1.0   | 0.0 |
| 21UR-104470 | 0.0  | 0.0  | 0.0  | 0.0  | 0.0   | 0.0 |
| 21UR-104490 | 0.0  | 0.0  | 0.0  | 0.0  | 0.0   | 0.0 |
| 21UR-10450  | 0.0  | 0.0  | 0.0  | 0.0  | 0.0   | 0.0 |
| 21UR-104500 | 8.0  | 2.0  | 6.0  | 0.0  | 1.0   | 1.0 |
| 21UR-104510 | 0.0  | 0.0  | 0.0  | 0.0  | 0.0   | 0.0 |
| 21UR-104520 | 0.0  | 0.0  | 0.0  | 0.0  | 0.0   | 0.0 |
| 21UR-104530 | 91.0 | 64.3 | 97.0 | 26.0 | 200.0 | 9.0 |
| 21UR-104540 | 0.0  | 0.0  | 0.0  | 0.0  | 0.0   | 0.0 |
| 21UR-104550 | 0.0  | 0.0  | 1.0  | 0.0  | 0.0   | 0.0 |
| 21UR-104560 | 0.0  | 0.0  | 0.0  | 0.0  | 0.0   | 0.0 |
| 21UR-104570 | 0.0  | 0.0  | 0.0  | 0.0  | 0.0   | 0.0 |
| 21UR-104580 | 0.0  | 0.0  | 0.0  | 0.0  | 0.0   | 0.0 |
| 21UR-104590 | 2.0  | 0.0  | 0.0  | 0.0  | 0.0   | 0.0 |
| 21UR-10460  | 2.0  | 6.0  | 9.0  | 0.0  | 3.0   | 0.0 |
| 21UR-104600 | 0.0  | 0.0  | 0.0  | 0.0  | 0.0   | 0.0 |
| 21UR-104610 | 0.0  | 0.0  | 0.0  | 0.0  | 0.0   | 0.0 |
| 21UR-104620 | 0.0  | 0.0  | 1.0  | 0.0  | 0.0   | 0.0 |
| 21UR-104630 | 0.0  | 0.0  | 0.0  | 0.0  | 0.0   | 0.0 |
| 21UR-104640 | 0.0  | 0.0  | 0.0  | 0.0  | 0.0   | 0.0 |
| 21UR-104650 | 0.0  | 0.0  | 0.0  | 0.0  | 0.0   | 0.0 |
| 21UR-104660 | 0.0  | 0.0  | 0.0  | 0.0  | 0.0   | 0.0 |
| 21UR-104670 | 42.0 | 3.0  | 17.0 | 7.0  | 7.0   | 8.0 |
| 21UR-104680 | 0.0  | 0.0  | 0.0  | 0.0  | 0.0   | 1.0 |
| 21UR-104690 | 0.0  | 0.0  | 0.0  | 0.0  | 0.0   | 0.0 |
| 21UR-10470  | 0.0  | 0.0  | 0.0  | 0.0  | 0.0   | 0.0 |
| 21UR-104700 | 2.0  | 0.0  | 2.0  | 0.0  | 0.0   | 0.0 |

|             |       |       |       |       |       |      |
|-------------|-------|-------|-------|-------|-------|------|
| 21UR-104710 | 1.0   | 0.0   | 0.0   | 0.0   | 1.0   | 0.0  |
| 21UR-104720 | 0.0   | 0.0   | 0.0   | 0.0   | 0.0   | 0.0  |
| 21UR-104730 | 45.0  | 6.0   | 32.0  | 16.0  | 19.0  | 0.0  |
| 21UR-104740 | 59.0  | 0.0   | 32.0  | 9.0   | 0.3   | 1.0  |
| 21UR-104750 | 0.0   | 2.0   | 0.0   | 0.0   | 0.0   | 0.0  |
| 21UR-104760 | 1.0   | 4.0   | 0.0   | 0.0   | 6.0   | 0.0  |
| 21UR-104770 | 8.0   | 4.0   | 12.0  | 0.0   | 8.0   | 4.0  |
| 21UR-104780 | 0.0   | 0.0   | 1.0   | 0.0   | 0.1   | 0.0  |
| 21UR-104790 | 0.0   | 0.0   | 0.0   | 0.0   | 0.0   | 0.0  |
| 21UR-10480  | 0.0   | 0.0   | 0.0   | 0.0   | 0.0   | 0.0  |
| 21UR-104800 | 0.0   | 0.0   | 0.0   | 0.0   | 0.0   | 0.0  |
| 21UR-104810 | 0.0   | 0.7   | 0.0   | 0.0   | 0.0   | 0.0  |
| 21UR-104820 | 0.0   | 0.0   | 0.0   | 0.0   | 0.0   | 1.0  |
| 21UR-104830 | 0.0   | 0.0   | 1.0   | 0.0   | 0.0   | 0.0  |
| 21UR-104840 | 0.0   | 0.0   | 0.0   | 0.0   | 0.0   | 0.0  |
| 21UR-104850 | 0.0   | 0.0   | 0.0   | 0.0   | 0.0   | 0.0  |
| 21UR-104860 | 0.0   | 0.0   | 0.0   | 0.0   | 0.0   | 0.0  |
| 21UR-104870 | 0.0   | 0.0   | 4.0   | 1.0   | 1.0   | 0.0  |
| 21UR-104880 | 0.0   | 0.0   | 0.0   | 0.0   | 0.0   | 0.0  |
| 21UR-104890 | 25.0  | 0.0   | 12.0  | 5.0   | 0.0   | 0.0  |
| 21UR-10490  | 17.0  | 4.0   | 25.0  | 3.0   | 24.0  | 1.0  |
| 21UR-104900 | 0.0   | 0.0   | 0.0   | 0.0   | 0.0   | 0.0  |
| 21UR-104910 | 42.0  | 8.0   | 45.0  | 19.0  | 30.0  | 0.0  |
| 21UR-104920 | 0.0   | 0.0   | 1.0   | 0.0   | 0.0   | 1.0  |
| 21UR-104930 | 0.0   | 2.0   | 1.0   | 0.0   | 0.0   | 0.0  |
| 21UR-104940 | 0.0   | 0.0   | 0.0   | 0.0   | 0.0   | 0.0  |
| 21UR-104950 | 0.0   | 0.0   | 0.0   | 0.0   | 5.0   | 0.0  |
| 21UR-104960 | 0.0   | 0.0   | 0.0   | 0.0   | 0.0   | 0.0  |
| 21UR-104970 | 3.0   | 0.0   | 1.0   | 4.0   | 0.5   | 0.0  |
| 21UR-104980 | 0.0   | 0.0   | 0.0   | 0.0   | 0.0   | 0.0  |
| 21UR-104990 | 0.0   | 0.0   | 0.0   | 0.0   | 0.0   | 0.0  |
| 21UR-1050   | 0.0   | 2.0   | 0.0   | 0.0   | 1.0   | 0.0  |
| 21UR-10500  | 12.0  | 1.0   | 20.0  | 4.0   | 6.0   | 0.0  |
| 21UR-105000 | 0.0   | 0.0   | 0.0   | 0.0   | 0.0   | 0.0  |
| 21UR-105020 | 0.0   | 0.0   | 0.0   | 0.0   | 1.0   | 0.0  |
| 21UR-105030 | 1.0   | 0.0   | 3.0   | 0.0   | 2.0   | 0.0  |
| 21UR-105040 | 1.0   | 2.0   | 0.0   | 1.0   | 1.0   | 0.0  |
| 21UR-105050 | 3.0   | 0.0   | 3.0   | 0.0   | 0.0   | 0.0  |
| 21UR-105060 | 0.0   | 0.0   | 0.0   | 0.0   | 0.0   | 0.0  |
| 21UR-105070 | 1.0   | 0.0   | 4.0   | 0.0   | 0.0   | 0.0  |
| 21UR-105080 | 4.0   | 0.0   | 2.0   | 2.0   | 0.0   | 0.0  |
| 21UR-105090 | 1.0   | 1.0   | 1.0   | 0.0   | 0.0   | 0.0  |
| 21UR-10510  | 6.0   | 0.0   | 0.0   | 6.0   | 5.0   | 0.3  |
| 21UR-105100 | 0.0   | 0.0   | 0.0   | 0.0   | 0.0   | 0.0  |
| 21UR-105110 | 0.0   | 0.0   | 0.0   | 0.0   | 0.0   | 0.0  |
| 21UR-105120 | 0.0   | 4.0   | 1.0   | 0.0   | 0.0   | 1.0  |
| 21UR-105130 | 167.4 | 115.7 | 163.5 | 114.0 | 229.8 | 48.0 |
| 21UR-105140 | 0.0   | 0.0   | 0.0   | 0.0   | 0.0   | 0.0  |
| 21UR-105150 | 0.0   | 0.0   | 2.0   | 0.0   | 0.0   | 0.0  |
| 21UR-105160 | 1.0   | 0.0   | 4.0   | 0.0   | 0.0   | 0.0  |
| 21UR-105170 | 0.0   | 0.0   | 0.0   | 0.0   | 0.0   | 0.0  |

|             |       |      |      |      |      |     |
|-------------|-------|------|------|------|------|-----|
| 21UR-105180 | 1.0   | 2.4  | 10.0 | 0.0  | 2.0  | 1.0 |
| 21UR-105190 | 0.0   | 0.0  | 0.0  | 0.0  | 0.0  | 0.0 |
| 21UR-10520  | 4.0   | 0.0  | 0.0  | 0.0  | 0.0  | 0.0 |
| 21UR-105200 | 0.0   | 0.0  | 0.0  | 0.0  | 0.0  | 0.0 |
| 21UR-105210 | 0.0   | 0.0  | 0.0  | 0.0  | 0.0  | 0.0 |
| 21UR-105220 | 0.0   | 0.0  | 0.0  | 0.0  | 0.0  | 0.0 |
| 21UR-105230 | 3.0   | 16.0 | 16.0 | 6.0  | 35.0 | 3.0 |
| 21UR-105240 | 0.0   | 0.0  | 0.0  | 0.0  | 0.0  | 0.0 |
| 21UR-105250 | 0.0   | 0.0  | 0.0  | 0.0  | 0.0  | 0.0 |
| 21UR-105260 | 14.5  | 0.0  | 6.0  | 6.0  | 0.0  | 0.0 |
| 21UR-105270 | 0.0   | 1.0  | 0.0  | 0.0  | 3.0  | 0.0 |
| 21UR-105280 | 0.1   | 0.0  | 3.0  | 0.0  | 0.0  | 0.0 |
| 21UR-105290 | 1.0   | 1.0  | 0.0  | 0.0  | 1.0  | 0.0 |
| 21UR-10530  | 0.0   | 1.0  | 0.0  | 1.0  | 0.0  | 0.0 |
| 21UR-105300 | 0.0   | 0.0  | 0.0  | 0.0  | 0.0  | 0.0 |
| 21UR-105310 | 0.0   | 0.0  | 0.0  | 0.0  | 0.0  | 0.0 |
| 21UR-105320 | 2.0   | 7.0  | 0.0  | 1.0  | 5.0  | 0.0 |
| 21UR-105330 | 8.5   | 4.0  | 7.0  | 0.0  | 2.0  | 0.0 |
| 21UR-105340 | 0.0   | 0.0  | 0.0  | 1.0  | 0.0  | 0.0 |
| 21UR-105350 | 0.0   | 3.0  | 1.0  | 0.0  | 2.0  | 0.0 |
| 21UR-105370 | 0.0   | 0.0  | 0.0  | 0.0  | 0.0  | 0.0 |
| 21UR-105380 | 0.0   | 0.0  | 0.0  | 0.0  | 0.0  | 0.0 |
| 21UR-105390 | 0.0   | 0.0  | 0.0  | 0.0  | 0.0  | 0.0 |
| 21UR-10540  | 0.0   | 4.0  | 0.0  | 0.0  | 4.0  | 1.0 |
| 21UR-105400 | 2.0   | 1.0  | 1.0  | 1.0  | 10.0 | 0.0 |
| 21UR-105410 | 22.0  | 3.1  | 35.0 | 3.0  | 1.0  | 1.0 |
| 21UR-105420 | 0.0   | 1.0  | 1.0  | 0.0  | 0.0  | 0.0 |
| 21UR-105430 | 6.0   | 15.0 | 6.0  | 4.0  | 9.0  | 0.0 |
| 21UR-105440 | 0.0   | 0.0  | 0.0  | 0.0  | 0.0  | 0.0 |
| 21UR-105450 | 110.5 | 9.0  | 98.0 | 44.5 | 44.0 | 1.0 |
| 21UR-105460 | 0.0   | 0.0  | 0.0  | 0.0  | 0.0  | 0.0 |
| 21UR-105470 | 0.0   | 0.0  | 0.0  | 0.0  | 0.0  | 0.0 |
| 21UR-105480 | 0.0   | 1.0  | 1.0  | 0.0  | 0.0  | 0.0 |
| 21UR-105490 | 0.0   | 1.0  | 1.0  | 0.0  | 0.0  | 0.0 |
| 21UR-10550  | 0.0   | 0.0  | 0.0  | 0.0  | 0.0  | 0.0 |
| 21UR-105500 | 3.0   | 5.0  | 5.0  | 4.0  | 1.0  | 0.0 |
| 21UR-105510 | 8.0   | 1.5  | 2.0  | 0.0  | 7.0  | 1.0 |
| 21UR-105520 | 1.0   | 0.0  | 0.0  | 0.0  | 0.0  | 0.0 |
| 21UR-105530 | 0.0   | 1.0  | 1.0  | 0.0  | 0.0  | 0.0 |
| 21UR-105540 | 1.0   | 1.0  | 1.0  | 0.0  | 0.0  | 0.0 |
| 21UR-105550 | 0.0   | 0.0  | 0.0  | 0.0  | 0.0  | 0.0 |
| 21UR-105560 | 0.0   | 0.0  | 0.0  | 0.0  | 0.0  | 0.0 |
| 21UR-105570 | 0.0   | 0.0  | 0.0  | 0.0  | 0.0  | 0.0 |
| 21UR-105580 | 7.0   | 3.0  | 11.0 | 1.0  | 2.0  | 0.0 |
| 21UR-105590 | 0.0   | 0.0  | 0.0  | 0.0  | 1.0  | 0.0 |
| 21UR-10560  | 9.0   | 11.0 | 6.0  | 1.0  | 6.0  | 1.0 |
| 21UR-105600 | 79.0  | 10.0 | 37.0 | 9.0  | 15.0 | 4.0 |
| 21UR-105610 | 5.0   | 3.0  | 5.0  | 2.0  | 0.0  | 1.0 |
| 21UR-105620 | 0.0   | 0.0  | 0.0  | 0.0  | 0.0  | 0.0 |
| 21UR-105630 | 0.0   | 0.0  | 0.0  | 0.0  | 0.0  | 0.0 |
| 21UR-105640 | 0.0   | 0.0  | 0.0  | 0.0  | 0.0  | 0.0 |



|             |       |       |       |      |      |     |
|-------------|-------|-------|-------|------|------|-----|
| 21UR-105650 | 0.0   | 0.0   | 0.0   | 0.0  | 0.0  | 0.0 |
| 21UR-105660 | 0.0   | 1.0   | 1.0   | 0.0  | 0.0  | 0.0 |
| 21UR-105670 | 0.0   | 0.0   | 0.0   | 0.0  | 0.0  | 0.0 |
| 21UR-105680 | 1.0   | 0.0   | 0.0   | 0.0  | 0.0  | 0.0 |
| 21UR-105690 | 1.0   | 0.0   | 0.0   | 0.0  | 0.0  | 0.0 |
| 21UR-10570  | 1.0   | 1.0   | 1.0   | 6.0  | 0.0  | 0.0 |
| 21UR-105700 | 0.0   | 0.0   | 0.0   | 0.0  | 0.0  | 0.0 |
| 21UR-105710 | 7.0   | 3.0   | 3.0   | 3.0  | 1.0  | 0.0 |
| 21UR-105720 | 0.0   | 0.0   | 0.0   | 0.0  | 0.0  | 0.0 |
| 21UR-105730 | 0.0   | 0.0   | 0.0   | 0.0  | 0.0  | 0.0 |
| 21UR-105740 | 0.0   | 0.0   | 0.0   | 0.0  | 0.0  | 0.0 |
| 21UR-105750 | 3.0   | 1.0   | 0.0   | 0.0  | 0.0  | 0.0 |
| 21UR-105760 | 0.0   | 0.0   | 0.0   | 0.0  | 0.0  | 0.0 |
| 21UR-105770 | 0.0   | 0.1   | 0.0   | 0.0  | 0.0  | 0.0 |
| 21UR-105790 | 0.0   | 0.0   | 0.0   | 0.0  | 0.0  | 0.0 |
| 21UR-10580  | 0.0   | 1.0   | 0.0   | 0.0  | 1.0  | 0.0 |
| 21UR-105800 | 0.0   | 0.0   | 0.0   | 0.0  | 0.0  | 0.0 |
| 21UR-105810 | 3.0   | 0.0   | 1.0   | 0.0  | 0.0  | 0.0 |
| 21UR-105820 | 27.5  | 5.0   | 17.0  | 14.0 | 11.5 | 0.0 |
| 21UR-105830 | 0.0   | 0.0   | 0.0   | 0.0  | 0.0  | 0.0 |
| 21UR-105840 | 0.0   | 0.0   | 1.0   | 0.0  | 0.0  | 0.0 |
| 21UR-105850 | 0.0   | 0.0   | 0.0   | 0.0  | 0.0  | 0.0 |
| 21UR-105870 | 0.0   | 0.0   | 0.0   | 0.0  | 0.0  | 0.0 |
| 21UR-105880 | 0.0   | 2.0   | 1.0   | 0.0  | 0.0  | 0.0 |
| 21UR-105890 | 199.5 | 118.0 | 181.0 | 47.0 | 98.0 | 4.0 |
| 21UR-10590  | 20.0  | 22.0  | 25.0  | 6.0  | 2.0  | 2.0 |
| 21UR-105900 | 0.0   | 1.0   | 1.0   | 1.0  | 0.0  | 0.0 |
| 21UR-105910 | 0.0   | 0.0   | 0.0   | 0.0  | 0.0  | 0.0 |
| 21UR-105920 | 30.0  | 86.0  | 34.0  | 10.0 | 59.0 | 9.0 |
| 21UR-105930 | 1.0   | 0.0   | 1.0   | 0.0  | 0.0  | 0.0 |
| 21UR-105940 | 0.0   | 0.0   | 0.0   | 0.0  | 0.0  | 0.0 |
| 21UR-105950 | 2.0   | 0.0   | 0.0   | 0.0  | 0.0  | 0.0 |
| 21UR-105960 | 0.0   | 0.0   | 0.0   | 0.0  | 0.0  | 0.0 |
| 21UR-105970 | 0.0   | 0.0   | 0.0   | 0.0  | 0.0  | 0.0 |
| 21UR-105980 | 2.0   | 0.0   | 1.0   | 1.0  | 0.0  | 0.0 |
| 21UR-105990 | 1.0   | 0.0   | 0.0   | 0.0  | 0.0  | 0.0 |
| 21UR-1060   | 0.0   | 0.0   | 0.0   | 0.0  | 0.0  | 0.0 |
| 21UR-10600  | 0.0   | 0.0   | 0.0   | 1.0  | 0.0  | 0.0 |
| 21UR-106000 | 0.0   | 1.0   | 0.0   | 0.0  | 0.0  | 0.0 |
| 21UR-106010 | 1.0   | 0.0   | 0.0   | 0.0  | 0.0  | 0.0 |
| 21UR-106020 | 0.0   | 0.0   | 0.0   | 1.0  | 0.0  | 0.0 |
| 21UR-106040 | 0.0   | 1.0   | 0.0   | 0.0  | 1.0  | 0.0 |
| 21UR-106050 | 0.0   | 0.0   | 0.0   | 0.0  | 0.0  | 0.0 |
| 21UR-106060 | 0.0   | 0.0   | 0.0   | 0.0  | 0.0  | 0.0 |
| 21UR-106070 | 0.0   | 0.4   | 0.0   | 0.0  | 0.0  | 0.0 |
| 21UR-106080 | 2.0   | 0.0   | 1.0   | 0.0  | 0.0  | 0.0 |
| 21UR-106090 | 1.0   | 0.0   | 2.0   | 4.0  | 0.0  | 0.0 |
| 21UR-10610  | 0.0   | 0.0   | 0.0   | 0.0  | 0.0  | 0.0 |
| 21UR-106100 | 0.0   | 0.0   | 0.0   | 0.0  | 0.0  | 0.0 |
| 21UR-106110 | 0.0   | 0.0   | 1.0   | 0.0  | 0.0  | 0.0 |
| 21UR-106120 | 0.0   | 0.0   | 0.0   | 1.0  | 0.0  | 0.0 |

|             |       |      |       |       |       |     |
|-------------|-------|------|-------|-------|-------|-----|
| 21UR-106130 | 0.0   | 0.0  | 0.0   | 0.0   | 0.0   | 0.0 |
| 21UR-106140 | 0.0   | 0.0  | 0.0   | 0.0   | 0.0   | 0.0 |
| 21UR-106150 | 0.0   | 0.0  | 0.0   | 0.0   | 0.0   | 0.0 |
| 21UR-106160 | 0.0   | 0.6  | 2.0   | 0.0   | 1.0   | 0.0 |
| 21UR-106170 | 64.5  | 40.0 | 66.0  | 16.0  | 42.0  | 2.0 |
| 21UR-106180 | 4.0   | 0.0  | 1.0   | 1.0   | 0.0   | 0.0 |
| 21UR-106190 | 20.0  | 3.0  | 12.0  | 7.0   | 4.0   | 0.0 |
| 21UR-10620  | 4.0   | 3.0  | 0.0   | 1.0   | 7.0   | 8.0 |
| 21UR-106200 | 19.0  | 0.0  | 18.0  | 4.0   | 5.0   | 0.0 |
| 21UR-106210 | 0.0   | 0.0  | 0.0   | 0.0   | 0.0   | 0.0 |
| 21UR-106220 | 0.0   | 0.0  | 0.0   | 0.0   | 1.0   | 0.0 |
| 21UR-106230 | 0.0   | 0.0  | 0.0   | 0.0   | 1.0   | 0.0 |
| 21UR-106240 | 0.0   | 0.0  | 0.0   | 0.0   | 0.0   | 0.0 |
| 21UR-106250 | 0.0   | 0.0  | 0.0   | 0.0   | 0.0   | 0.0 |
| 21UR-106260 | 0.0   | 0.0  | 0.0   | 0.0   | 0.0   | 0.0 |
| 21UR-106270 | 0.0   | 0.0  | 1.0   | 0.0   | 0.0   | 0.0 |
| 21UR-106280 | 0.0   | 0.0  | 0.0   | 0.0   | 0.0   | 0.0 |
| 21UR-106290 | 0.0   | 1.0  | 1.0   | 0.0   | 1.0   | 0.0 |
| 21UR-10630  | 1.0   | 4.0  | 2.0   | 0.0   | 7.0   | 1.0 |
| 21UR-106300 | 0.0   | 0.0  | 1.0   | 0.0   | 0.0   | 0.0 |
| 21UR-106310 | 0.0   | 0.0  | 0.0   | 0.0   | 0.0   | 0.0 |
| 21UR-106320 | 1.0   | 0.0  | 0.0   | 0.0   | 1.0   | 1.0 |
| 21UR-106330 | 0.0   | 0.0  | 0.0   | 0.0   | 0.0   | 0.0 |
| 21UR-106340 | 1.0   | 0.0  | 0.0   | 0.0   | 0.0   | 0.0 |
| 21UR-106350 | 0.0   | 0.0  | 0.0   | 0.0   | 0.0   | 0.0 |
| 21UR-106360 | 0.0   | 0.0  | 0.0   | 0.0   | 0.0   | 0.0 |
| 21UR-106370 | 0.0   | 0.0  | 0.0   | 0.0   | 0.0   | 0.0 |
| 21UR-106380 | 0.0   | 0.0  | 0.0   | 0.0   | 0.0   | 0.0 |
| 21UR-106390 | 0.0   | 1.0  | 0.0   | 0.0   | 0.0   | 0.0 |
| 21UR-10640  | 0.0   | 0.0  | 0.0   | 0.0   | 0.0   | 0.0 |
| 21UR-106400 | 851.3 | 53.3 | 774.0 | 881.0 | 200.0 | 8.0 |
| 21UR-106410 | 3.0   | 7.0  | 1.0   | 1.0   | 1.0   | 2.0 |
| 21UR-106420 | 15.0  | 6.0  | 23.0  | 4.0   | 15.0  | 1.0 |
| 21UR-106430 | 0.0   | 0.0  | 0.0   | 0.0   | 4.0   | 0.0 |
| 21UR-106440 | 251.8 | 30.0 | 304.7 | 130.3 | 186.7 | 0.0 |
| 21UR-106450 | 0.0   | 0.0  | 0.0   | 0.0   | 0.0   | 0.0 |
| 21UR-106460 | 0.0   | 0.0  | 0.0   | 0.0   | 0.0   | 0.0 |
| 21UR-106470 | 0.0   | 0.0  | 2.0   | 0.0   | 1.0   | 0.0 |
| 21UR-106480 | 0.0   | 0.0  | 0.0   | 0.0   | 0.0   | 0.0 |
| 21UR-106490 | 0.0   | 0.0  | 0.0   | 0.0   | 0.0   | 0.0 |
| 21UR-10650  | 241.0 | 28.0 | 274.0 | 119.0 | 99.0  | 6.0 |
| 21UR-106500 | 1.0   | 0.0  | 0.0   | 0.0   | 2.0   | 0.0 |
| 21UR-106510 | 0.0   | 0.1  | 0.0   | 0.0   | 0.0   | 0.0 |
| 21UR-106520 | 0.0   | 0.0  | 0.0   | 0.0   | 0.0   | 0.0 |
| 21UR-106530 | 0.0   | 0.0  | 0.0   | 0.0   | 0.0   | 0.0 |
| 21UR-106540 | 0.0   | 0.0  | 0.0   | 0.0   | 0.0   | 0.0 |
| 21UR-106550 | 0.0   | 0.0  | 0.0   | 0.0   | 0.0   | 0.0 |
| 21UR-106560 | 0.0   | 0.0  | 0.0   | 0.0   | 0.0   | 1.0 |
| 21UR-106570 | 0.0   | 0.0  | 0.0   | 0.0   | 0.0   | 0.0 |
| 21UR-106580 | 0.0   | 0.0  | 0.0   | 0.0   | 0.0   | 0.0 |
| 21UR-106590 | 1.0   | 0.0  | 0.0   | 0.0   | 0.0   | 0.0 |

|             |       |       |       |       |      |     |
|-------------|-------|-------|-------|-------|------|-----|
| 21UR-10660  | 0.0   | 0.0   | 0.0   | 0.0   | 3.0  | 0.0 |
| 21UR-106600 | 0.0   | 0.0   | 0.0   | 0.0   | 0.0  | 0.0 |
| 21UR-106610 | 4.0   | 0.0   | 6.0   | 0.0   | 3.0  | 0.0 |
| 21UR-106620 | 0.0   | 0.0   | 0.0   | 0.0   | 0.0  | 0.0 |
| 21UR-106630 | 0.0   | 0.0   | 0.0   | 0.0   | 0.0  | 0.0 |
| 21UR-106640 | 0.0   | 0.0   | 0.0   | 0.0   | 0.0  | 0.0 |
| 21UR-106650 | 0.0   | 0.0   | 0.0   | 0.0   | 0.0  | 0.0 |
| 21UR-106660 | 0.0   | 0.0   | 0.0   | 0.0   | 0.0  | 0.0 |
| 21UR-106670 | 0.0   | 1.0   | 1.0   | 0.0   | 0.0  | 0.0 |
| 21UR-106680 | 0.0   | 0.0   | 0.0   | 0.0   | 0.0  | 0.0 |
| 21UR-106690 | 0.0   | 0.0   | 0.0   | 0.0   | 0.0  | 0.0 |
| 21UR-10670  | 0.0   | 1.0   | 0.0   | 0.0   | 0.0  | 0.0 |
| 21UR-106700 | 0.0   | 0.0   | 0.0   | 0.0   | 0.0  | 0.0 |
| 21UR-106710 | 0.0   | 0.0   | 0.0   | 0.0   | 0.0  | 0.0 |
| 21UR-106720 | 0.0   | 1.0   | 0.0   | 0.0   | 0.0  | 0.0 |
| 21UR-106730 | 1.0   | 0.0   | 2.0   | 2.0   | 3.0  | 0.0 |
| 21UR-106740 | 0.0   | 0.0   | 0.0   | 0.0   | 0.0  | 0.0 |
| 21UR-106750 | 29.0  | 10.0  | 48.0  | 15.0  | 23.0 | 4.0 |
| 21UR-106760 | 0.0   | 1.0   | 1.0   | 0.0   | 0.0  | 0.0 |
| 21UR-106770 | 0.0   | 1.0   | 0.0   | 0.0   | 0.0  | 0.0 |
| 21UR-106780 | 0.0   | 0.0   | 0.0   | 0.0   | 0.0  | 0.0 |
| 21UR-106790 | 0.0   | 0.0   | 0.0   | 0.0   | 0.0  | 0.0 |
| 21UR-10680  | 4.0   | 0.0   | 4.0   | 0.0   | 1.0  | 0.0 |
| 21UR-106800 | 0.0   | 0.0   | 0.0   | 0.0   | 0.0  | 0.0 |
| 21UR-106810 | 1.0   | 2.0   | 2.0   | 0.0   | 1.0  | 0.0 |
| 21UR-106820 | 0.0   | 0.0   | 0.0   | 0.0   | 0.0  | 0.0 |
| 21UR-106830 | 0.0   | 0.0   | 0.0   | 0.0   | 0.0  | 0.0 |
| 21UR-106840 | 0.0   | 0.0   | 0.0   | 0.0   | 0.0  | 0.0 |
| 21UR-106850 | 0.0   | 0.0   | 0.0   | 0.0   | 0.0  | 0.0 |
| 21UR-106860 | 38.0  | 7.0   | 29.0  | 13.0  | 18.0 | 0.0 |
| 21UR-106870 | 0.0   | 0.0   | 0.0   | 0.0   | 0.0  | 0.0 |
| 21UR-106880 | 1.0   | 0.0   | 1.0   | 0.0   | 2.0  | 0.0 |
| 21UR-106890 | 0.0   | 0.0   | 0.0   | 0.0   | 0.0  | 0.0 |
| 21UR-10690  | 1.0   | 1.0   | 4.0   | 1.0   | 6.0  | 0.0 |
| 21UR-106900 | 0.0   | 0.0   | 0.0   | 0.0   | 0.0  | 0.0 |
| 21UR-106910 | 0.0   | 0.0   | 0.0   | 0.0   | 0.0  | 0.0 |
| 21UR-106920 | 298.0 | 107.0 | 219.5 | 185.5 | 76.5 | 8.0 |
| 21UR-106930 | 0.0   | 0.0   | 0.0   | 0.0   | 0.0  | 0.0 |
| 21UR-106940 | 75.0  | 9.0   | 64.0  | 34.0  | 2.0  | 0.0 |
| 21UR-106950 | 0.0   | 0.0   | 0.0   | 0.0   | 0.0  | 0.0 |
| 21UR-106960 | 4.0   | 4.0   | 0.0   | 0.0   | 1.0  | 0.0 |
| 21UR-106970 | 0.0   | 0.0   | 0.0   | 0.0   | 1.0  | 0.0 |
| 21UR-106980 | 0.0   | 0.0   | 0.0   | 0.0   | 0.0  | 0.0 |
| 21UR-106990 | 0.0   | 0.0   | 0.0   | 0.0   | 0.0  | 0.0 |
| 21UR-1070   | 0.0   | 0.0   | 0.0   | 0.0   | 0.0  | 0.0 |
| 21UR-10700  | 1.0   | 0.0   | 2.0   | 0.0   | 1.0  | 1.0 |
| 21UR-107000 | 0.0   | 0.0   | 0.0   | 0.0   | 2.0  | 0.0 |
| 21UR-107010 | 0.0   | 0.0   | 0.0   | 0.0   | 0.0  | 0.0 |
| 21UR-107020 | 0.0   | 0.0   | 0.0   | 0.0   | 0.0  | 0.0 |
| 21UR-107030 | 0.0   | 0.0   | 0.0   | 0.0   | 0.0  | 0.0 |
| 21UR-107040 | 0.0   | 0.0   | 0.0   | 0.0   | 0.0  | 0.0 |

|             |       |       |       |       |       |      |
|-------------|-------|-------|-------|-------|-------|------|
| 21UR-107050 | 1.0   | 0.0   | 0.0   | 0.0   | 0.0   | 0.0  |
| 21UR-107060 | 0.0   | 0.0   | 0.0   | 0.0   | 0.0   | 0.0  |
| 21UR-107080 | 0.0   | 0.0   | 0.0   | 0.0   | 0.0   | 0.0  |
| 21UR-107090 | 3.0   | 2.0   | 2.0   | 2.0   | 1.0   | 0.0  |
| 21UR-10710  | 0.0   | 0.0   | 0.0   | 1.0   | 0.0   | 0.0  |
| 21UR-107100 | 6.0   | 5.0   | 3.0   | 0.0   | 1.0   | 2.0  |
| 21UR-107110 | 99.0  | 52.0  | 121.0 | 36.0  | 44.0  | 4.0  |
| 21UR-107120 | 0.0   | 0.0   | 0.0   | 0.0   | 0.0   | 0.0  |
| 21UR-107130 | 0.0   | 0.0   | 0.0   | 0.0   | 0.0   | 0.0  |
| 21UR-107140 | 1.0   | 8.0   | 7.0   | 4.0   | 1.0   | 2.0  |
| 21UR-107150 | 1.0   | 0.0   | 4.0   | 0.0   | 0.0   | 0.0  |
| 21UR-107160 | 3.0   | 0.0   | 1.0   | 1.0   | 0.0   | 0.0  |
| 21UR-107170 | 0.0   | 0.0   | 0.0   | 0.0   | 0.0   | 0.0  |
| 21UR-107180 | 0.0   | 0.0   | 0.0   | 0.0   | 0.0   | 0.0  |
| 21UR-107190 | 0.0   | 0.0   | 0.0   | 0.0   | 0.0   | 0.0  |
| 21UR-10720  | 1.0   | 0.0   | 0.0   | 0.0   | 1.0   | 0.0  |
| 21UR-107200 | 0.0   | 0.0   | 0.0   | 0.0   | 0.0   | 0.0  |
| 21UR-107210 | 232.0 | 142.0 | 234.5 | 126.5 | 103.0 | 22.0 |
| 21UR-107220 | 0.0   | 0.0   | 0.0   | 0.0   | 0.0   | 0.0  |
| 21UR-107230 | 1.0   | 0.0   | 1.0   | 0.0   | 0.0   | 0.0  |
| 21UR-107240 | 0.0   | 0.0   | 0.0   | 0.0   | 0.0   | 0.0  |
| 21UR-107250 | 0.0   | 0.0   | 0.0   | 0.0   | 0.0   | 0.0  |
| 21UR-107260 | 0.0   | 0.0   | 0.0   | 0.0   | 0.0   | 0.0  |
| 21UR-107270 | 0.0   | 0.0   | 0.0   | 0.0   | 0.0   | 0.0  |
| 21UR-107280 | 0.0   | 0.0   | 0.0   | 0.0   | 1.0   | 0.0  |
| 21UR-107290 | 0.0   | 0.0   | 0.0   | 0.0   | 0.0   | 1.0  |
| 21UR-10730  | 4.0   | 0.0   | 5.0   | 0.0   | 1.5   | 1.0  |
| 21UR-107300 | 0.0   | 0.0   | 0.0   | 0.0   | 0.0   | 0.0  |
| 21UR-107310 | 0.0   | 0.0   | 0.0   | 0.0   | 0.0   | 0.0  |
| 21UR-107320 | 5.0   | 2.0   | 3.0   | 0.0   | 5.0   | 0.0  |
| 21UR-107330 | 0.0   | 0.0   | 0.0   | 0.0   | 0.0   | 0.0  |
| 21UR-107340 | 1.0   | 0.0   | 1.0   | 1.0   | 1.0   | 0.0  |
| 21UR-107350 | 0.0   | 0.0   | 0.0   | 0.0   | 0.0   | 0.0  |
| 21UR-107360 | 0.0   | 0.0   | 0.0   | 0.0   | 0.0   | 0.0  |
| 21UR-107370 | 3.0   | 1.5   | 2.0   | 1.0   | 9.0   | 1.0  |
| 21UR-107380 | 0.0   | 0.0   | 0.0   | 0.0   | 0.0   | 0.0  |
| 21UR-107390 | 0.0   | 0.0   | 0.0   | 0.0   | 0.0   | 0.0  |
| 21UR-10740  | 2.0   | 0.0   | 1.0   | 0.0   | 0.0   | 0.0  |
| 21UR-107400 | 1.0   | 0.0   | 0.0   | 0.0   | 0.0   | 0.0  |
| 21UR-107410 | 0.0   | 0.0   | 0.0   | 0.0   | 0.0   | 0.0  |
| 21UR-107420 | 0.0   | 0.0   | 1.0   | 0.0   | 0.0   | 0.0  |
| 21UR-107430 | 0.0   | 0.0   | 0.0   | 0.0   | 0.0   | 0.0  |
| 21UR-107440 | 0.0   | 0.0   | 0.0   | 0.0   | 0.0   | 0.0  |
| 21UR-107450 | 0.0   | 0.0   | 1.0   | 0.0   | 0.0   | 0.0  |
| 21UR-107460 | 1.0   | 2.0   | 0.0   | 0.0   | 0.0   | 0.0  |
| 21UR-107470 | 0.0   | 4.0   | 0.0   | 0.0   | 1.0   | 0.0  |
| 21UR-107480 | 0.0   | 0.0   | 0.0   | 0.0   | 0.0   | 0.0  |
| 21UR-107490 | 0.0   | 2.0   | 0.0   | 0.0   | 2.0   | 0.0  |
| 21UR-10750  | 17.0  | 25.0  | 6.0   | 3.0   | 29.0  | 10.0 |
| 21UR-107500 | 0.0   | 0.0   | 0.0   | 0.0   | 0.0   | 0.0  |
| 21UR-107510 | 0.0   | 0.0   | 0.0   | 0.0   | 0.0   | 0.0  |

|             |      |      |      |      |      |     |
|-------------|------|------|------|------|------|-----|
| 21UR-107520 | 1.0  | 7.0  | 2.0  | 0.0  | 3.0  | 0.0 |
| 21UR-107530 | 0.0  | 0.0  | 1.0  | 0.0  | 0.0  | 0.0 |
| 21UR-107540 | 0.0  | 1.0  | 0.0  | 1.0  | 1.0  | 0.0 |
| 21UR-107550 | 0.0  | 0.0  | 0.0  | 0.0  | 0.0  | 0.0 |
| 21UR-107560 | 1.0  | 0.0  | 2.0  | 0.0  | 1.0  | 0.0 |
| 21UR-107570 | 0.0  | 2.0  | 4.0  | 0.0  | 8.0  | 0.0 |
| 21UR-107580 | 0.0  | 0.0  | 0.0  | 0.0  | 0.0  | 0.0 |
| 21UR-107590 | 0.0  | 0.0  | 0.0  | 0.0  | 0.0  | 0.0 |
| 21UR-10760  | 0.0  | 6.0  | 6.0  | 0.0  | 4.0  | 1.0 |
| 21UR-107600 | 0.0  | 0.0  | 0.0  | 0.0  | 0.0  | 0.0 |
| 21UR-107610 | 0.0  | 0.0  | 1.0  | 0.0  | 1.0  | 0.0 |
| 21UR-107620 | 0.0  | 0.0  | 0.0  | 0.0  | 0.0  | 0.0 |
| 21UR-107630 | 0.0  | 0.0  | 0.0  | 0.0  | 0.0  | 0.0 |
| 21UR-107640 | 4.0  | 0.0  | 0.0  | 0.0  | 8.0  | 1.0 |
| 21UR-107650 | 1.0  | 0.0  | 0.0  | 0.0  | 0.0  | 0.0 |
| 21UR-107660 | 0.0  | 0.0  | 0.0  | 0.0  | 0.0  | 0.0 |
| 21UR-107670 | 6.0  | 4.0  | 8.0  | 2.0  | 4.0  | 2.0 |
| 21UR-107680 | 0.0  | 0.0  | 0.0  | 0.0  | 0.0  | 0.0 |
| 21UR-107690 | 0.0  | 0.0  | 0.0  | 0.0  | 0.0  | 0.0 |
| 21UR-10770  | 0.0  | 1.0  | 0.0  | 0.0  | 0.0  | 0.0 |
| 21UR-107700 | 2.0  | 2.0  | 2.0  | 1.0  | 3.0  | 0.0 |
| 21UR-107710 | 0.0  | 1.0  | 0.0  | 1.0  | 1.0  | 0.0 |
| 21UR-107720 | 0.0  | 0.0  | 0.0  | 0.0  | 0.0  | 0.0 |
| 21UR-107730 | 23.0 | 0.0  | 20.0 | 9.0  | 1.0  | 0.0 |
| 21UR-107740 | 6.0  | 0.0  | 4.0  | 1.0  | 0.0  | 0.0 |
| 21UR-107750 | 1.0  | 0.0  | 0.0  | 0.0  | 0.0  | 0.0 |
| 21UR-107760 | 2.0  | 0.0  | 0.0  | 1.0  | 1.0  | 0.0 |
| 21UR-107770 | 0.0  | 0.0  | 0.0  | 0.0  | 0.0  | 0.0 |
| 21UR-107780 | 0.0  | 0.0  | 0.0  | 0.0  | 1.0  | 0.0 |
| 21UR-107790 | 0.0  | 0.0  | 0.0  | 0.0  | 0.0  | 0.0 |
| 21UR-10780  | 4.0  | 0.0  | 0.0  | 0.0  | 0.0  | 0.0 |
| 21UR-107800 | 21.0 | 14.0 | 15.5 | 16.0 | 14.0 | 3.0 |
| 21UR-107810 | 0.0  | 0.0  | 0.0  | 0.0  | 0.0  | 0.0 |
| 21UR-107820 | 0.0  | 0.0  | 0.0  | 0.0  | 0.0  | 0.0 |
| 21UR-107830 | 0.0  | 1.0  | 0.0  | 0.0  | 0.0  | 0.0 |
| 21UR-107840 | 0.0  | 0.0  | 0.0  | 0.0  | 0.0  | 0.0 |
| 21UR-107850 | 0.0  | 0.0  | 0.0  | 0.0  | 0.0  | 0.0 |
| 21UR-107860 | 0.0  | 0.0  | 0.0  | 0.0  | 0.0  | 0.0 |
| 21UR-107870 | 14.0 | 1.0  | 12.0 | 6.0  | 3.0  | 0.0 |
| 21UR-107880 | 0.0  | 0.0  | 0.0  | 0.0  | 0.0  | 0.0 |
| 21UR-107890 | 0.0  | 0.0  | 0.0  | 0.0  | 0.0  | 0.0 |
| 21UR-10790  | 29.0 | 43.0 | 29.0 | 12.0 | 81.0 | 8.0 |
| 21UR-107900 | 0.0  | 0.0  | 0.0  | 0.0  | 1.0  | 0.0 |
| 21UR-107910 | 44.0 | 18.7 | 43.0 | 25.0 | 27.0 | 0.0 |
| 21UR-107920 | 0.0  | 0.0  | 0.0  | 0.0  | 0.0  | 0.0 |
| 21UR-107930 | 0.0  | 0.0  | 0.0  | 0.0  | 0.0  | 0.0 |
| 21UR-107940 | 2.0  | 0.0  | 4.0  | 1.0  | 0.0  | 0.0 |
| 21UR-107950 | 0.0  | 3.0  | 2.0  | 0.0  | 2.0  | 0.0 |
| 21UR-107960 | 0.0  | 0.0  | 0.0  | 0.0  | 0.0  | 0.0 |
| 21UR-107970 | 0.0  | 1.0  | 0.0  | 0.0  | 0.0  | 0.0 |
| 21UR-107980 | 0.0  | 3.0  | 0.0  | 0.0  | 4.0  | 0.0 |

|             |       |      |       |       |       |      |
|-------------|-------|------|-------|-------|-------|------|
| 21UR-107990 | 0.0   | 1.0  | 0.0   | 0.0   | 0.0   | 0.0  |
| 21UR-1080   | 38.0  | 0.0  | 25.0  | 10.0  | 0.0   | 0.0  |
| 21UR-10800  | 0.0   | 0.0  | 0.0   | 0.0   | 0.0   | 0.0  |
| 21UR-108000 | 382.0 | 97.4 | 386.5 | 254.0 | 147.0 | 12.0 |
| 21UR-108010 | 0.0   | 0.0  | 1.0   | 0.0   | 0.0   | 0.0  |
| 21UR-108020 | 2.0   | 0.0  | 0.0   | 0.0   | 0.0   | 0.0  |
| 21UR-108030 | 0.0   | 0.0  | 0.0   | 0.0   | 0.0   | 0.0  |
| 21UR-108040 | 0.0   | 0.0  | 0.0   | 0.0   | 0.0   | 0.0  |
| 21UR-108050 | 0.0   | 0.0  | 0.0   | 0.0   | 0.0   | 0.0  |
| 21UR-108060 | 0.0   | 0.0  | 1.0   | 0.0   | 0.0   | 0.0  |
| 21UR-108070 | 0.0   | 0.0  | 2.0   | 2.0   | 0.0   | 0.0  |
| 21UR-108080 | 0.0   | 0.0  | 0.0   | 0.0   | 0.0   | 0.0  |
| 21UR-108090 | 0.0   | 0.0  | 0.0   | 0.0   | 0.0   | 0.0  |
| 21UR-10810  | 0.0   | 0.0  | 0.0   | 0.0   | 1.0   | 0.0  |
| 21UR-108100 | 1.0   | 0.0  | 0.0   | 0.0   | 0.0   | 0.0  |
| 21UR-108110 | 0.0   | 0.0  | 0.0   | 0.0   | 0.0   | 0.0  |
| 21UR-108120 | 1.0   | 1.0  | 2.0   | 0.0   | 1.0   | 0.0  |
| 21UR-108130 | 0.0   | 1.0  | 1.0   | 1.0   | 0.0   | 0.0  |
| 21UR-108140 | 0.0   | 0.0  | 0.0   | 0.0   | 1.0   | 0.0  |
| 21UR-108150 | 0.0   | 0.0  | 0.0   | 0.0   | 0.0   | 0.0  |
| 21UR-108160 | 0.0   | 0.0  | 0.0   | 0.0   | 0.0   | 0.0  |
| 21UR-108170 | 0.0   | 0.0  | 0.0   | 0.0   | 0.0   | 0.0  |
| 21UR-108180 | 0.0   | 0.0  | 0.0   | 0.0   | 0.0   | 0.0  |
| 21UR-108190 | 252.0 | 86.0 | 200.5 | 55.0  | 34.0  | 5.5  |
| 21UR-10820  | 2.0   | 0.0  | 0.0   | 0.0   | 1.0   | 0.0  |
| 21UR-108200 | 0.0   | 0.0  | 0.0   | 1.0   | 2.0   | 0.0  |
| 21UR-108210 | 0.0   | 0.0  | 0.0   | 0.0   | 0.0   | 0.0  |
| 21UR-108220 | 0.0   | 0.0  | 0.0   | 0.0   | 0.0   | 0.0  |
| 21UR-108230 | 0.0   | 0.0  | 0.0   | 0.0   | 0.0   | 0.0  |
| 21UR-108240 | 0.0   | 0.0  | 1.0   | 17.0  | 38.3  | 4.0  |
| 21UR-108250 | 0.0   | 0.0  | 0.0   | 0.0   | 0.0   | 0.0  |
| 21UR-108260 | 0.0   | 0.0  | 0.0   | 0.0   | 0.0   | 0.0  |
| 21UR-108270 | 1.0   | 0.0  | 0.0   | 0.0   | 0.0   | 0.0  |
| 21UR-108280 | 7.0   | 0.0  | 4.0   | 1.0   | 1.0   | 0.0  |
| 21UR-108290 | 0.0   | 0.0  | 0.0   | 0.0   | 0.0   | 0.0  |
| 21UR-10830  | 6.0   | 3.0  | 1.0   | 0.0   | 0.0   | 0.0  |
| 21UR-108310 | 0.0   | 0.0  | 0.0   | 0.0   | 0.0   | 0.0  |
| 21UR-108320 | 6.0   | 21.0 | 2.0   | 4.0   | 24.0  | 3.0  |
| 21UR-108330 | 0.0   | 1.0  | 0.0   | 0.0   | 0.0   | 0.0  |
| 21UR-108340 | 1.0   | 0.0  | 0.0   | 0.0   | 0.0   | 0.0  |
| 21UR-108350 | 293.0 | 39.0 | 192.1 | 60.0  | 108.3 | 14.0 |
| 21UR-108360 | 60.0  | 22.3 | 36.0  | 7.0   | 3.0   | 0.0  |
| 21UR-108370 | 1.0   | 0.1  | 3.0   | 1.0   | 1.0   | 1.0  |
| 21UR-108380 | 0.0   | 0.0  | 0.0   | 0.0   | 0.0   | 0.0  |
| 21UR-108390 | 0.0   | 0.0  | 0.0   | 0.0   | 0.0   | 0.0  |
| 21UR-10840  | 0.0   | 0.0  | 0.0   | 0.0   | 0.0   | 0.0  |
| 21UR-108400 | 0.0   | 0.0  | 0.0   | 0.0   | 0.0   | 0.0  |
| 21UR-108410 | 0.0   | 0.0  | 0.0   | 0.0   | 0.0   | 0.0  |
| 21UR-108420 | 0.0   | 0.0  | 0.0   | 0.0   | 0.0   | 0.0  |
| 21UR-108430 | 0.0   | 0.1  | 0.0   | 0.0   | 0.0   | 0.0  |
| 21UR-108440 | 0.0   | 1.0  | 0.0   | 0.0   | 2.0   | 0.0  |

|             |       |       |       |       |       |      |
|-------------|-------|-------|-------|-------|-------|------|
| 21UR-108450 | 0.0   | 0.0   | 0.0   | 0.0   | 0.0   | 0.0  |
| 21UR-108460 | 2.0   | 6.0   | 2.0   | 0.0   | 13.0  | 0.0  |
| 21UR-108470 | 0.0   | 0.0   | 0.0   | 0.0   | 0.0   | 0.0  |
| 21UR-108480 | 0.0   | 5.0   | 1.0   | 0.0   | 1.0   | 0.0  |
| 21UR-10850  | 18.0  | 12.0  | 12.0  | 1.0   | 17.0  | 4.0  |
| 21UR-108500 | 0.0   | 0.0   | 0.0   | 0.0   | 0.0   | 0.0  |
| 21UR-108510 | 0.0   | 0.0   | 0.0   | 0.0   | 1.0   | 0.0  |
| 21UR-108520 | 1.0   | 0.0   | 0.0   | 0.0   | 0.0   | 0.0  |
| 21UR-108530 | 0.0   | 0.0   | 0.0   | 0.0   | 0.0   | 0.0  |
| 21UR-108540 | 0.0   | 0.0   | 0.0   | 0.0   | 0.0   | 0.0  |
| 21UR-108550 | 0.0   | 0.0   | 0.0   | 0.0   | 0.0   | 0.0  |
| 21UR-108560 | 6.0   | 17.5  | 12.5  | 5.0   | 18.0  | 3.0  |
| 21UR-108570 | 0.0   | 0.0   | 0.0   | 0.0   | 0.0   | 0.0  |
| 21UR-108580 | 0.0   | 0.0   | 0.0   | 0.0   | 1.0   | 0.0  |
| 21UR-108590 | 2.0   | 3.0   | 3.0   | 0.0   | 0.0   | 0.0  |
| 21UR-10860  | 0.0   | 6.0   | 1.0   | 0.0   | 2.0   | 0.0  |
| 21UR-108600 | 0.0   | 1.0   | 0.0   | 1.0   | 2.7   | 0.0  |
| 21UR-108610 | 0.0   | 0.0   | 0.0   | 0.0   | 0.0   | 0.0  |
| 21UR-108620 | 0.0   | 0.0   | 0.0   | 0.0   | 0.0   | 0.0  |
| 21UR-108630 | 0.0   | 0.0   | 0.0   | 0.0   | 0.0   | 0.0  |
| 21UR-108640 | 0.0   | 0.0   | 0.0   | 0.0   | 0.0   | 0.0  |
| 21UR-108650 | 1.0   | 0.0   | 0.0   | 0.0   | 4.0   | 0.0  |
| 21UR-108660 | 0.0   | 0.0   | 0.0   | 0.0   | 0.0   | 0.0  |
| 21UR-108670 | 0.0   | 0.0   | 0.0   | 0.0   | 0.0   | 0.0  |
| 21UR-108680 | 72.0  | 45.0  | 68.0  | 24.0  | 162.0 | 2.0  |
| 21UR-108690 | 0.0   | 0.0   | 0.0   | 0.0   | 1.0   | 0.0  |
| 21UR-10870  | 364.0 | 235.0 | 309.0 | 127.0 | 86.0  | 23.0 |
| 21UR-108700 | 4.0   | 1.0   | 5.0   | 2.0   | 1.0   | 0.0  |
| 21UR-108710 | 0.0   | 0.0   | 0.0   | 0.0   | 0.0   | 0.0  |
| 21UR-108730 | 0.0   | 0.0   | 0.0   | 0.0   | 0.0   | 0.0  |
| 21UR-108740 | 1.0   | 0.0   | 1.0   | 0.0   | 0.0   | 2.0  |
| 21UR-108750 | 2.0   | 0.0   | 0.0   | 0.0   | 0.0   | 0.0  |
| 21UR-108760 | 0.0   | 0.0   | 0.0   | 0.0   | 0.0   | 0.0  |
| 21UR-108770 | 0.0   | 0.0   | 0.0   | 0.0   | 0.0   | 0.0  |
| 21UR-108780 | 2.0   | 0.0   | 1.0   | 0.0   | 0.0   | 0.0  |
| 21UR-108790 | 1.0   | 0.0   | 4.0   | 0.0   | 0.0   | 0.0  |
| 21UR-10880  | 27.0  | 33.0  | 27.0  | 1.0   | 41.5  | 6.0  |
| 21UR-108800 | 0.0   | 0.0   | 0.0   | 0.0   | 0.0   | 0.0  |
| 21UR-108810 | 11.0  | 6.0   | 10.0  | 5.0   | 5.0   | 0.0  |
| 21UR-108820 | 0.0   | 0.0   | 0.0   | 0.0   | 0.0   | 0.0  |
| 21UR-108830 | 0.0   | 0.0   | 0.0   | 0.0   | 0.0   | 0.0  |
| 21UR-108840 | 0.0   | 1.0   | 0.0   | 0.0   | 2.0   | 0.0  |
| 21UR-108850 | 0.0   | 0.0   | 0.0   | 0.0   | 0.0   | 0.0  |
| 21UR-108860 | 0.0   | 0.0   | 0.0   | 0.0   | 0.0   | 0.0  |
| 21UR-108870 | 4.0   | 5.0   | 5.0   | 1.0   | 6.0   | 1.0  |
| 21UR-108880 | 2.0   | 0.0   | 1.0   | 0.0   | 1.0   | 0.0  |
| 21UR-108890 | 0.0   | 0.0   | 0.0   | 0.0   | 2.0   | 0.0  |
| 21UR-10890  | 1.0   | 0.0   | 4.0   | 0.0   | 0.0   | 0.0  |
| 21UR-108900 | 0.0   | 0.0   | 0.0   | 0.0   | 0.0   | 0.0  |
| 21UR-108910 | 1.0   | 0.0   | 4.0   | 1.0   | 1.0   | 0.0  |
| 21UR-108920 | 0.0   | 0.0   | 0.0   | 0.0   | 0.0   | 0.0  |

|             |       |      |       |      |      |     |
|-------------|-------|------|-------|------|------|-----|
| 21UR-108930 | 11.0  | 1.0  | 5.0   | 2.0  | 0.0  | 0.0 |
| 21UR-108940 | 213.0 | 37.0 | 150.0 | 59.0 | 30.0 | 3.0 |
| 21UR-108950 | 0.0   | 0.0  | 0.0   | 0.0  | 0.0  | 0.0 |
| 21UR-108960 | 7.0   | 2.0  | 7.0   | 1.0  | 7.0  | 0.0 |
| 21UR-108970 | 2.0   | 2.1  | 0.0   | 0.0  | 3.0  | 0.0 |
| 21UR-108980 | 0.0   | 0.0  | 0.0   | 0.0  | 0.0  | 0.0 |
| 21UR-108990 | 5.0   | 2.0  | 2.0   | 1.0  | 2.0  | 1.0 |
| 21UR-1090   | 0.0   | 0.0  | 0.0   | 0.0  | 0.0  | 0.0 |
| 21UR-10900  | 0.0   | 1.0  | 0.0   | 0.0  | 0.0  | 1.0 |
| 21UR-109000 | 0.0   | 1.0  | 0.0   | 0.0  | 0.0  | 0.0 |
| 21UR-109010 | 0.0   | 0.0  | 0.0   | 0.0  | 0.0  | 0.0 |
| 21UR-109020 | 0.0   | 0.0  | 0.0   | 0.0  | 0.0  | 0.0 |
| 21UR-109030 | 0.0   | 0.0  | 0.0   | 0.0  | 0.0  | 0.0 |
| 21UR-109040 | 0.0   | 0.0  | 0.0   | 0.0  | 0.0  | 0.0 |
| 21UR-109050 | 0.0   | 0.0  | 0.0   | 0.0  | 0.0  | 0.0 |
| 21UR-109060 | 0.0   | 1.0  | 0.0   | 0.0  | 0.0  | 0.0 |
| 21UR-109070 | 1.0   | 0.0  | 0.0   | 0.0  | 0.0  | 0.0 |
| 21UR-109080 | 0.0   | 0.0  | 0.0   | 0.0  | 0.0  | 0.0 |
| 21UR-109090 | 0.0   | 0.0  | 0.0   | 0.0  | 0.0  | 0.0 |
| 21UR-10910  | 16.0  | 26.0 | 28.0  | 8.0  | 14.0 | 1.0 |
| 21UR-109100 | 5.0   | 3.0  | 9.0   | 2.0  | 11.0 | 1.0 |
| 21UR-109110 | 0.0   | 0.0  | 0.0   | 0.0  | 1.0  | 0.0 |
| 21UR-109120 | 0.0   | 0.0  | 0.0   | 0.0  | 0.0  | 0.0 |
| 21UR-109130 | 19.0  | 16.5 | 16.0  | 3.0  | 36.3 | 1.0 |
| 21UR-109140 | 0.0   | 0.0  | 0.0   | 0.0  | 0.0  | 0.0 |
| 21UR-109150 | 0.0   | 0.0  | 0.0   | 0.0  | 0.0  | 0.0 |
| 21UR-109160 | 0.0   | 0.0  | 0.0   | 0.0  | 0.0  | 0.0 |
| 21UR-109170 | 0.0   | 0.0  | 0.0   | 0.0  | 0.0  | 0.0 |
| 21UR-109180 | 0.0   | 0.0  | 0.0   | 0.0  | 0.0  | 0.0 |
| 21UR-109190 | 0.0   | 0.0  | 0.0   | 0.0  | 0.0  | 0.0 |
| 21UR-10920  | 4.0   | 1.0  | 4.0   | 1.0  | 1.0  | 0.0 |
| 21UR-109200 | 0.0   | 0.0  | 0.0   | 0.0  | 0.0  | 0.0 |
| 21UR-109210 | 1.0   | 0.0  | 1.0   | 0.0  | 2.0  | 0.0 |
| 21UR-109220 | 1.0   | 0.0  | 1.0   | 2.0  | 0.0  | 0.0 |
| 21UR-109230 | 0.0   | 0.0  | 0.0   | 0.0  | 0.0  | 0.0 |
| 21UR-109240 | 23.0  | 3.0  | 15.0  | 11.5 | 8.0  | 1.0 |
| 21UR-109260 | 7.0   | 21.0 | 3.0   | 5.0  | 53.0 | 5.0 |
| 21UR-109270 | 0.0   | 0.0  | 0.0   | 0.0  | 0.0  | 0.0 |
| 21UR-109280 | 0.0   | 0.0  | 0.0   | 0.0  | 0.0  | 0.0 |
| 21UR-109290 | 0.0   | 0.0  | 0.0   | 0.0  | 0.0  | 0.0 |
| 21UR-10930  | 1.0   | 0.0  | 0.0   | 0.0  | 1.0  | 1.0 |
| 21UR-109300 | 1.0   | 0.0  | 1.0   | 0.0  | 0.0  | 0.0 |
| 21UR-109310 | 12.0  | 0.0  | 0.0   | 0.0  | 1.0  | 0.0 |
| 21UR-109320 | 5.0   | 2.0  | 14.0  | 2.0  | 5.0  | 1.0 |
| 21UR-109330 | 0.0   | 0.0  | 0.0   | 0.0  | 0.0  | 0.0 |
| 21UR-109340 | 9.0   | 2.0  | 5.0   | 0.0  | 8.0  | 1.0 |
| 21UR-109350 | 23.0  | 10.0 | 13.0  | 13.0 | 8.0  | 0.5 |
| 21UR-109360 | 0.0   | 0.0  | 0.0   | 0.0  | 0.0  | 0.0 |
| 21UR-109370 | 1.0   | 0.0  | 1.0   | 2.0  | 0.0  | 0.0 |
| 21UR-109380 | 1.0   | 0.0  | 1.0   | 0.0  | 1.0  | 0.0 |
| 21UR-109390 | 0.0   | 0.0  | 0.0   | 0.0  | 0.0  | 0.0 |



|             |       |       |       |       |       |      |
|-------------|-------|-------|-------|-------|-------|------|
| 21UR-10940  | 0.0   | 0.0   | 0.0   | 0.0   | 0.0   | 0.0  |
| 21UR-109400 | 2.0   | 0.5   | 0.0   | 0.0   | 0.0   | 0.1  |
| 21UR-109410 | 2.0   | 0.0   | 1.0   | 0.0   | 3.0   | 0.0  |
| 21UR-109420 | 0.0   | 3.0   | 0.0   | 0.0   | 2.0   | 0.0  |
| 21UR-109430 | 1.0   | 0.0   | 0.0   | 0.0   | 0.0   | 0.0  |
| 21UR-109440 | 0.0   | 0.0   | 0.0   | 0.0   | 0.0   | 0.0  |
| 21UR-109450 | 0.0   | 0.0   | 0.0   | 0.0   | 0.0   | 0.0  |
| 21UR-109460 | 0.0   | 0.0   | 0.0   | 0.0   | 0.0   | 0.0  |
| 21UR-109470 | 2.0   | 2.0   | 1.0   | 1.0   | 0.0   | 1.0  |
| 21UR-109480 | 0.0   | 1.0   | 0.0   | 0.0   | 0.0   | 0.0  |
| 21UR-109490 | 0.0   | 0.0   | 1.0   | 0.0   | 1.0   | 0.0  |
| 21UR-10950  | 6.0   | 0.0   | 6.0   | 0.0   | 0.0   | 0.0  |
| 21UR-109500 | 0.0   | 0.0   | 0.0   | 0.0   | 0.0   | 0.0  |
| 21UR-109510 | 237.0 | 8.0   | 228.0 | 116.0 | 12.0  | 0.0  |
| 21UR-109520 | 0.0   | 0.0   | 0.0   | 1.0   | 0.0   | 0.0  |
| 21UR-109530 | 0.0   | 1.0   | 0.0   | 0.0   | 1.0   | 0.0  |
| 21UR-109540 | 3.0   | 2.0   | 5.0   | 1.0   | 4.0   | 0.0  |
| 21UR-109550 | 0.0   | 0.0   | 0.0   | 0.0   | 0.0   | 0.0  |
| 21UR-109560 | 0.0   | 1.0   | 0.0   | 0.0   | 0.0   | 1.0  |
| 21UR-109570 | 0.0   | 0.0   | 0.0   | 0.0   | 0.0   | 0.0  |
| 21UR-109580 | 0.0   | 0.0   | 0.0   | 0.0   | 0.0   | 0.0  |
| 21UR-109590 | 0.0   | 0.0   | 0.0   | 0.0   | 0.0   | 0.0  |
| 21UR-10960  | 0.0   | 0.0   | 0.0   | 0.0   | 0.0   | 0.0  |
| 21UR-109600 | 0.0   | 1.0   | 0.0   | 0.0   | 6.0   | 1.0  |
| 21UR-109610 | 2.0   | 9.0   | 3.0   | 0.0   | 1.0   | 0.0  |
| 21UR-109620 | 9.0   | 3.0   | 14.0  | 3.0   | 2.0   | 1.0  |
| 21UR-109630 | 12.0  | 2.0   | 8.0   | 1.0   | 2.0   | 0.0  |
| 21UR-109640 | 0.0   | 0.0   | 0.0   | 0.0   | 0.0   | 0.0  |
| 21UR-109650 | 0.0   | 0.0   | 0.0   | 0.0   | 0.0   | 0.0  |
| 21UR-109660 | 170.0 | 8.0   | 164.0 | 87.0  | 29.0  | 0.0  |
| 21UR-109670 | 0.0   | 0.0   | 0.0   | 0.0   | 0.0   | 0.0  |
| 21UR-109680 | 13.0  | 1.0   | 9.0   | 1.0   | 0.0   | 1.0  |
| 21UR-109690 | 0.0   | 0.0   | 0.0   | 0.0   | 0.0   | 0.0  |
| 21UR-10970  | 0.0   | 18.0  | 0.0   | 0.0   | 4.0   | 0.0  |
| 21UR-109700 | 3.0   | 6.0   | 2.0   | 1.0   | 34.1  | 1.0  |
| 21UR-109710 | 0.0   | 0.0   | 2.0   | 0.0   | 0.0   | 0.0  |
| 21UR-109720 | 100.8 | 119.7 | 110.0 | 17.0  | 193.2 | 15.0 |
| 21UR-109730 | 4.0   | 1.0   | 5.0   | 1.0   | 0.0   | 0.0  |
| 21UR-109740 | 0.0   | 0.0   | 0.0   | 0.0   | 0.0   | 0.0  |
| 21UR-109750 | 1.0   | 2.0   | 9.5   | 2.0   | 0.0   | 0.0  |
| 21UR-109760 | 8.0   | 7.0   | 5.0   | 2.0   | 2.2   | 1.0  |
| 21UR-109770 | 0.0   | 0.0   | 0.0   | 0.0   | 0.0   | 0.0  |
| 21UR-109780 | 0.0   | 0.0   | 0.0   | 0.0   | 0.0   | 0.0  |
| 21UR-109790 | 0.0   | 0.0   | 0.0   | 0.0   | 0.0   | 0.0  |
| 21UR-10980  | 0.0   | 0.1   | 0.0   | 0.0   | 0.0   | 0.0  |
| 21UR-109800 | 0.0   | 0.0   | 0.0   | 0.0   | 0.0   | 0.0  |
| 21UR-109810 | 0.0   | 0.0   | 0.0   | 1.0   | 0.0   | 0.0  |
| 21UR-109820 | 0.0   | 0.0   | 0.0   | 0.0   | 0.0   | 0.0  |
| 21UR-109830 | 1.0   | 0.0   | 1.0   | 0.0   | 1.0   | 0.0  |
| 21UR-109840 | 0.0   | 0.0   | 0.0   | 0.0   | 0.0   | 0.0  |
| 21UR-109850 | 0.0   | 0.1   | 0.0   | 0.0   | 0.0   | 0.0  |

|             |       |       |      |      |       |      |
|-------------|-------|-------|------|------|-------|------|
| 21UR-109860 | 1.0   | 0.0   | 1.0  | 0.0  | 1.0   | 0.0  |
| 21UR-109880 | 1.0   | 0.0   | 6.0  | 0.0  | 0.0   | 0.0  |
| 21UR-109890 | 0.0   | 0.0   | 0.0  | 1.0  | 0.0   | 0.0  |
| 21UR-10990  | 0.0   | 4.0   | 0.0  | 0.0  | 2.0   | 0.0  |
| 21UR-109900 | 0.0   | 0.0   | 0.0  | 0.0  | 0.0   | 0.0  |
| 21UR-109920 | 0.0   | 0.0   | 0.0  | 0.0  | 0.0   | 0.0  |
| 21UR-109930 | 10.0  | 8.0   | 13.0 | 0.0  | 1.0   | 0.0  |
| 21UR-109940 | 0.0   | 0.0   | 0.0  | 0.0  | 0.0   | 0.0  |
| 21UR-109950 | 4.0   | 10.5  | 5.0  | 1.0  | 2.0   | 0.0  |
| 21UR-109960 | 5.0   | 1.0   | 1.0  | 2.0  | 4.0   | 0.0  |
| 21UR-109970 | 0.0   | 1.0   | 2.0  | 5.0  | 3.0   | 0.0  |
| 21UR-109980 | 0.0   | 0.0   | 0.0  | 0.0  | 0.0   | 0.0  |
| 21UR-109990 | 0.0   | 0.0   | 0.0  | 0.0  | 1.0   | 0.0  |
| 21UR-110    | 0.0   | 0.0   | 0.0  | 0.0  | 0.0   | 0.0  |
| 21UR-1100   | 26.0  | 1.0   | 19.0 | 4.0  | 2.0   | 0.0  |
| 21UR-11000  | 0.0   | 0.0   | 1.0  | 0.0  | 1.0   | 0.0  |
| 21UR-110000 | 177.0 | 238.5 | 94.0 | 87.0 | 116.0 | 18.0 |
| 21UR-110010 | 0.0   | 0.0   | 0.0  | 0.0  | 1.0   | 0.0  |
| 21UR-110020 | 12.0  | 1.0   | 4.0  | 1.0  | 14.0  | 4.0  |
| 21UR-110030 | 3.0   | 3.0   | 3.0  | 1.0  | 0.0   | 0.0  |
| 21UR-110040 | 0.0   | 0.0   | 2.0  | 0.0  | 0.0   | 0.0  |
| 21UR-110050 | 0.0   | 0.0   | 0.0  | 0.0  | 0.0   | 0.0  |
| 21UR-110060 | 13.0  | 32.0  | 15.0 | 4.0  | 30.0  | 3.0  |
| 21UR-110070 | 0.0   | 0.0   | 0.0  | 0.0  | 0.0   | 0.0  |
| 21UR-110080 | 0.0   | 0.0   | 0.0  | 0.0  | 0.0   | 0.0  |
| 21UR-110090 | 0.0   | 0.0   | 0.0  | 0.0  | 1.0   | 0.0  |
| 21UR-11010  | 0.0   | 0.0   | 0.0  | 0.0  | 0.0   | 0.0  |
| 21UR-110100 | 0.0   | 0.0   | 0.0  | 0.0  | 0.0   | 0.0  |
| 21UR-110110 | 1.0   | 0.0   | 1.0  | 0.0  | 0.0   | 0.0  |
| 21UR-110120 | 7.0   | 0.0   | 4.0  | 1.0  | 0.0   | 0.0  |
| 21UR-110130 | 0.0   | 0.0   | 0.0  | 0.0  | 0.0   | 0.0  |
| 21UR-110140 | 0.0   | 0.0   | 0.0  | 0.0  | 0.0   | 0.0  |
| 21UR-110150 | 0.0   | 0.0   | 0.0  | 0.0  | 0.0   | 0.0  |
| 21UR-110160 | 0.0   | 0.0   | 0.0  | 0.0  | 0.0   | 0.0  |
| 21UR-110170 | 0.0   | 0.0   | 0.0  | 0.0  | 0.0   | 0.0  |
| 21UR-110180 | 0.0   | 0.0   | 0.0  | 0.0  | 0.0   | 0.0  |
| 21UR-110190 | 36.0  | 10.0  | 11.0 | 2.0  | 2.0   | 0.0  |
| 21UR-11020  | 6.0   | 2.0   | 8.0  | 1.0  | 1.0   | 0.0  |
| 21UR-110200 | 16.0  | 1.0   | 13.0 | 3.0  | 8.8   | 0.0  |
| 21UR-110210 | 0.0   | 0.0   | 0.0  | 0.0  | 0.0   | 0.0  |
| 21UR-110220 | 11.0  | 7.0   | 13.0 | 2.0  | 23.0  | 1.0  |
| 21UR-110230 | 0.0   | 0.0   | 0.0  | 0.0  | 4.0   | 0.0  |
| 21UR-110240 | 3.0   | 3.0   | 9.0  | 0.0  | 2.0   | 0.0  |
| 21UR-110250 | 4.0   | 1.0   | 3.0  | 1.0  | 0.0   | 0.0  |
| 21UR-110260 | 0.0   | 0.0   | 0.0  | 0.0  | 0.0   | 0.0  |
| 21UR-110270 | 5.0   | 12.0  | 5.0  | 0.0  | 7.0   | 4.0  |
| 21UR-110280 | 8.0   | 4.0   | 8.0  | 0.0  | 1.0   | 0.0  |
| 21UR-110290 | 28.0  | 17.0  | 33.0 | 10.0 | 13.0  | 4.0  |
| 21UR-11030  | 0.0   | 0.0   | 0.0  | 0.0  | 0.0   | 0.0  |
| 21UR-110300 | 0.0   | 0.0   | 0.0  | 0.0  | 6.0   | 0.0  |
| 21UR-110310 | 0.0   | 1.0   | 0.0  | 0.0  | 1.0   | 0.0  |

|             |       |       |       |      |       |      |
|-------------|-------|-------|-------|------|-------|------|
| 21UR-110320 | 0.0   | 0.0   | 0.0   | 0.0  | 0.0   | 0.0  |
| 21UR-110330 | 17.0  | 0.0   | 11.0  | 3.0  | 2.0   | 0.0  |
| 21UR-110340 | 0.0   | 0.0   | 0.0   | 0.0  | 0.0   | 0.0  |
| 21UR-110350 | 0.0   | 0.0   | 0.0   | 0.0  | 1.0   | 0.0  |
| 21UR-110360 | 207.0 | 352.5 | 216.5 | 89.0 | 222.0 | 14.0 |
| 21UR-110370 | 0.0   | 0.0   | 0.0   | 0.0  | 0.0   | 0.0  |
| 21UR-110380 | 3.0   | 20.0  | 10.0  | 0.0  | 10.0  | 1.0  |
| 21UR-110390 | 4.0   | 1.0   | 0.0   | 0.0  | 7.0   | 1.0  |
| 21UR-11040  | 1.0   | 3.0   | 0.0   | 1.0  | 4.0   | 0.0  |
| 21UR-110400 | 161.0 | 44.0  | 156.0 | 99.0 | 82.0  | 4.0  |
| 21UR-110410 | 0.0   | 0.0   | 0.0   | 0.0  | 0.0   | 0.0  |
| 21UR-110420 | 1.0   | 0.0   | 2.0   | 0.0  | 1.0   | 1.1  |
| 21UR-110430 | 0.0   | 10.0  | 2.0   | 2.0  | 2.0   | 2.0  |
| 21UR-110440 | 0.0   | 0.1   | 1.0   | 0.0  | 0.0   | 0.0  |
| 21UR-110450 | 1.0   | 0.0   | 0.0   | 0.0  | 0.0   | 0.0  |
| 21UR-110460 | 0.0   | 0.0   | 0.0   | 0.0  | 0.0   | 0.0  |
| 21UR-110470 | 13.7  | 34.0  | 14.0  | 2.0  | 29.0  | 3.0  |
| 21UR-110490 | 0.0   | 0.0   | 0.0   | 0.0  | 0.0   | 0.0  |
| 21UR-11050  | 0.0   | 6.0   | 0.0   | 0.0  | 4.0   | 0.0  |
| 21UR-110500 | 0.0   | 0.0   | 0.0   | 0.0  | 0.0   | 0.0  |
| 21UR-110510 | 0.0   | 2.0   | 0.0   | 0.0  | 2.0   | 0.0  |
| 21UR-110520 | 0.0   | 0.0   | 1.0   | 0.0  | 0.0   | 0.0  |
| 21UR-110540 | 0.0   | 0.0   | 0.0   | 0.0  | 0.0   | 0.0  |
| 21UR-110560 | 11.0  | 0.0   | 1.0   | 0.0  | 3.0   | 4.0  |
| 21UR-110570 | 0.0   | 0.0   | 0.0   | 0.0  | 0.0   | 0.0  |
| 21UR-110580 | 0.0   | 1.0   | 0.0   | 0.0  | 0.0   | 0.0  |
| 21UR-110590 | 0.0   | 0.0   | 0.0   | 0.0  | 0.0   | 0.0  |
| 21UR-11060  | 0.0   | 0.0   | 0.0   | 0.0  | 0.0   | 0.0  |
| 21UR-110600 | 0.0   | 0.0   | 0.0   | 0.0  | 0.0   | 0.0  |
| 21UR-110610 | 0.0   | 0.0   | 0.0   | 0.0  | 3.0   | 0.0  |
| 21UR-110620 | 0.0   | 0.0   | 0.0   | 0.0  | 0.0   | 0.0  |
| 21UR-110630 | 0.0   | 0.0   | 0.0   | 0.0  | 0.0   | 0.0  |
| 21UR-110640 | 0.0   | 0.0   | 0.0   | 0.0  | 0.0   | 0.0  |
| 21UR-110650 | 0.0   | 0.0   | 0.0   | 0.0  | 0.0   | 0.0  |
| 21UR-110660 | 0.0   | 7.0   | 2.0   | 1.0  | 4.0   | 0.0  |
| 21UR-110670 | 4.0   | 0.0   | 1.0   | 1.0  | 0.0   | 0.0  |
| 21UR-110680 | 0.0   | 0.0   | 0.0   | 0.0  | 0.0   | 0.0  |
| 21UR-110690 | 0.0   | 0.0   | 0.0   | 0.0  | 0.0   | 0.0  |
| 21UR-11070  | 0.0   | 0.0   | 0.0   | 0.0  | 0.0   | 0.0  |
| 21UR-110700 | 0.0   | 0.0   | 0.0   | 0.0  | 0.0   | 0.0  |
| 21UR-110710 | 0.0   | 0.0   | 0.0   | 0.0  | 0.0   | 1.0  |
| 21UR-110720 | 3.0   | 2.0   | 3.0   | 0.0  | 2.0   | 0.0  |
| 21UR-110730 | 2.0   | 0.0   | 1.0   | 0.0  | 0.0   | 0.0  |
| 21UR-110740 | 0.0   | 0.0   | 0.0   | 0.0  | 0.0   | 0.0  |
| 21UR-110750 | 0.0   | 0.0   | 0.0   | 0.0  | 0.0   | 0.0  |
| 21UR-110760 | 0.0   | 0.0   | 0.0   | 0.0  | 0.0   | 0.0  |
| 21UR-110770 | 0.0   | 0.0   | 0.0   | 0.0  | 0.0   | 0.0  |
| 21UR-110780 | 0.0   | 0.0   | 0.0   | 0.0  | 0.0   | 0.0  |
| 21UR-110790 | 0.0   | 0.1   | 0.0   | 0.0  | 0.0   | 0.0  |
| 21UR-11080  | 0.0   | 2.0   | 0.0   | 0.0  | 0.0   | 0.0  |
| 21UR-110800 | 0.0   | 0.0   | 0.0   | 0.0  | 0.0   | 0.0  |

|             |        |       |        |        |       |      |
|-------------|--------|-------|--------|--------|-------|------|
| 21UR-110810 | 1.0    | 0.0   | 0.0    | 0.0    | 0.0   | 0.0  |
| 21UR-110820 | 0.0    | 0.0   | 0.0    | 0.0    | 0.0   | 0.0  |
| 21UR-110830 | 1.0    | 0.0   | 1.0    | 0.0    | 0.0   | 0.0  |
| 21UR-110840 | 0.0    | 0.0   | 0.0    | 0.0    | 0.1   | 0.0  |
| 21UR-110850 | 0.0    | 0.0   | 0.0    | 0.0    | 0.0   | 0.0  |
| 21UR-110860 | 1.0    | 0.0   | 3.0    | 0.0    | 2.0   | 0.0  |
| 21UR-110870 | 9.0    | 2.1   | 2.0    | 1.0    | 0.0   | 0.1  |
| 21UR-110880 | 0.0    | 0.0   | 0.0    | 0.0    | 0.0   | 0.0  |
| 21UR-110890 | 0.0    | 0.0   | 0.0    | 0.0    | 0.0   | 0.0  |
| 21UR-11090  | 1.0    | 0.0   | 0.0    | 0.0    | 4.0   | 0.1  |
| 21UR-110900 | 0.0    | 0.0   | 0.0    | 0.0    | 0.0   | 0.0  |
| 21UR-110910 | 5.0    | 6.0   | 3.0    | 1.0    | 17.0  | 1.0  |
| 21UR-110920 | 0.0    | 0.0   | 0.0    | 0.0    | 0.0   | 0.0  |
| 21UR-110930 | 0.0    | 1.0   | 3.0    | 0.0    | 0.0   | 0.0  |
| 21UR-110940 | 1.0    | 3.0   | 0.0    | 0.0    | 1.0   | 0.0  |
| 21UR-110950 | 0.0    | 0.0   | 0.0    | 0.0    | 0.0   | 0.0  |
| 21UR-110960 | 0.0    | 0.0   | 0.0    | 0.0    | 0.0   | 0.0  |
| 21UR-110970 | 0.0    | 0.0   | 0.0    | 0.0    | 1.0   | 0.0  |
| 21UR-110980 | 0.0    | 0.0   | 0.0    | 0.0    | 0.0   | 0.0  |
| 21UR-110990 | 0.0    | 0.0   | 0.0    | 0.0    | 0.0   | 0.0  |
| 21UR-1110   | 0.0    | 0.0   | 0.0    | 0.0    | 0.0   | 0.0  |
| 21UR-11100  | 0.0    | 3.0   | 0.0    | 0.0    | 0.0   | 1.0  |
| 21UR-111000 | 0.0    | 0.0   | 0.0    | 0.0    | 0.0   | 0.0  |
| 21UR-111010 | 0.0    | 0.0   | 0.0    | 0.0    | 0.0   | 0.0  |
| 21UR-111020 | 0.0    | 0.0   | 0.0    | 0.0    | 0.0   | 0.0  |
| 21UR-111040 | 0.0    | 0.0   | 0.0    | 0.0    | 0.0   | 0.0  |
| 21UR-111050 | 0.0    | 0.0   | 0.0    | 0.0    | 0.0   | 0.0  |
| 21UR-111060 | 0.0    | 0.0   | 0.0    | 0.0    | 0.0   | 0.0  |
| 21UR-111070 | 2.0    | 2.0   | 1.0    | 2.0    | 0.0   | 0.0  |
| 21UR-111080 | 0.0    | 0.0   | 0.0    | 0.0    | 0.0   | 0.0  |
| 21UR-111090 | 0.0    | 0.0   | 0.0    | 0.0    | 0.0   | 0.0  |
| 21UR-11110  | 0.0    | 0.0   | 0.0    | 0.0    | 0.0   | 0.0  |
| 21UR-111100 | 1.0    | 1.0   | 1.0    | 1.0    | 1.0   | 0.0  |
| 21UR-111110 | 0.0    | 0.0   | 0.0    | 0.0    | 0.0   | 0.0  |
| 21UR-111120 | 0.0    | 0.0   | 0.0    | 0.0    | 0.0   | 0.0  |
| 21UR-111130 | 1.0    | 0.0   | 2.0    | 2.0    | 12.0  | 0.0  |
| 21UR-111150 | 0.0    | 0.0   | 0.0    | 0.0    | 0.0   | 0.0  |
| 21UR-111160 | 0.0    | 0.0   | 0.0    | 0.0    | 0.0   | 0.0  |
| 21UR-111170 | 0.0    | 0.0   | 0.0    | 0.0    | 0.0   | 0.0  |
| 21UR-111180 | 0.0    | 0.0   | 0.0    | 0.0    | 0.0   | 0.0  |
| 21UR-111190 | 0.0    | 0.0   | 2.0    | 0.0    | 1.0   | 1.0  |
| 21UR-11120  | 0.0    | 0.0   | 0.0    | 0.0    | 2.0   | 0.0  |
| 21UR-111200 | 0.0    | 0.0   | 0.0    | 0.0    | 0.0   | 0.0  |
| 21UR-111210 | 0.0    | 0.0   | 0.0    | 0.0    | 0.0   | 0.0  |
| 21UR-111220 | 1970.5 | 333.5 | 1824.0 | 1212.5 | 503.0 | 55.0 |
| 21UR-111230 | 0.0    | 0.0   | 0.0    | 0.0    | 0.0   | 0.0  |
| 21UR-111240 | 0.0    | 1.0   | 1.0    | 0.0    | 1.0   | 0.0  |
| 21UR-111250 | 0.0    | 0.0   | 0.0    | 0.0    | 1.0   | 0.0  |
| 21UR-111260 | 0.0    | 0.0   | 0.0    | 0.0    | 0.0   | 0.0  |
| 21UR-111270 | 0.0    | 0.0   | 0.0    | 0.0    | 0.0   | 0.0  |
| 21UR-111280 | 0.0    | 0.0   | 1.0    | 0.0    | 0.0   | 0.0  |

|             |      |      |      |      |      |     |
|-------------|------|------|------|------|------|-----|
| 21UR-111290 | 0.0  | 0.0  | 0.0  | 0.0  | 0.0  | 0.0 |
| 21UR-11130  | 2.0  | 17.0 | 9.0  | 6.0  | 55.0 | 6.0 |
| 21UR-111300 | 0.0  | 0.0  | 0.0  | 0.0  | 0.0  | 0.0 |
| 21UR-111310 | 0.0  | 0.0  | 0.0  | 0.0  | 0.0  | 0.0 |
| 21UR-111320 | 0.0  | 0.0  | 0.0  | 0.0  | 0.0  | 0.0 |
| 21UR-111330 | 12.0 | 4.0  | 16.0 | 6.0  | 0.2  | 0.0 |
| 21UR-111350 | 0.0  | 1.0  | 0.0  | 0.0  | 0.0  | 0.0 |
| 21UR-111360 | 0.0  | 0.0  | 0.0  | 1.0  | 0.0  | 0.1 |
| 21UR-111370 | 4.0  | 0.0  | 1.0  | 0.0  | 0.0  | 0.0 |
| 21UR-111380 | 0.0  | 0.0  | 0.0  | 0.0  | 0.0  | 0.0 |
| 21UR-111390 | 12.0 | 11.0 | 21.0 | 3.0  | 14.5 | 0.0 |
| 21UR-11140  | 3.0  | 7.5  | 0.0  | 1.0  | 0.0  | 0.0 |
| 21UR-111400 | 1.0  | 4.0  | 0.0  | 0.0  | 1.0  | 2.0 |
| 21UR-111410 | 0.0  | 0.0  | 0.0  | 0.0  | 0.0  | 0.0 |
| 21UR-111420 | 0.0  | 0.0  | 0.0  | 0.0  | 0.0  | 0.0 |
| 21UR-111430 | 0.0  | 0.0  | 0.0  | 0.0  | 2.0  | 0.0 |
| 21UR-111440 | 1.0  | 2.0  | 1.0  | 1.0  | 2.0  | 0.0 |
| 21UR-111450 | 0.0  | 0.0  | 0.0  | 0.0  | 0.0  | 0.0 |
| 21UR-111460 | 0.0  | 0.0  | 0.0  | 0.0  | 0.0  | 0.0 |
| 21UR-111470 | 1.0  | 5.0  | 1.0  | 0.0  | 2.0  | 0.0 |
| 21UR-111480 | 33.0 | 26.0 | 35.0 | 17.0 | 10.0 | 0.0 |
| 21UR-111490 | 25.0 | 13.0 | 16.0 | 8.0  | 4.0  | 1.0 |
| 21UR-11150  | 4.0  | 5.0  | 0.0  | 1.0  | 14.0 | 0.0 |
| 21UR-111500 | 7.0  | 51.0 | 6.3  | 4.0  | 10.0 | 3.2 |
| 21UR-111510 | 0.0  | 0.0  | 0.0  | 0.0  | 0.0  | 0.0 |
| 21UR-111520 | 0.0  | 0.0  | 0.0  | 0.0  | 0.0  | 0.0 |
| 21UR-111530 | 0.0  | 0.0  | 0.0  | 0.0  | 0.0  | 0.0 |
| 21UR-111540 | 0.0  | 0.0  | 0.0  | 0.0  | 0.0  | 0.0 |
| 21UR-111550 | 0.0  | 1.0  | 0.0  | 0.0  | 1.0  | 0.0 |
| 21UR-111560 | 0.0  | 0.0  | 0.0  | 0.0  | 0.0  | 0.0 |
| 21UR-111570 | 0.0  | 0.0  | 0.0  | 0.0  | 0.0  | 0.0 |
| 21UR-111580 | 0.0  | 0.0  | 0.0  | 0.0  | 0.0  | 0.0 |
| 21UR-111590 | 13.0 | 0.0  | 5.0  | 0.0  | 2.0  | 0.0 |
| 21UR-11160  | 1.0  | 5.0  | 7.0  | 2.0  | 6.0  | 0.0 |
| 21UR-111600 | 0.0  | 0.0  | 0.0  | 0.0  | 0.0  | 0.0 |
| 21UR-111610 | 0.0  | 0.0  | 0.0  | 0.0  | 0.0  | 0.0 |
| 21UR-111620 | 0.0  | 0.0  | 0.0  | 0.0  | 0.0  | 0.0 |
| 21UR-111640 | 1.0  | 0.0  | 1.0  | 0.0  | 0.0  | 0.0 |
| 21UR-111650 | 0.0  | 0.0  | 0.0  | 0.0  | 0.0  | 0.0 |
| 21UR-111660 | 1.0  | 3.0  | 0.0  | 0.0  | 0.0  | 1.0 |
| 21UR-111670 | 0.0  | 0.0  | 1.0  | 0.0  | 0.0  | 0.0 |
| 21UR-111680 | 7.0  | 15.0 | 7.0  | 2.0  | 11.0 | 0.0 |
| 21UR-111690 | 0.0  | 6.0  | 2.0  | 1.0  | 0.0  | 1.0 |
| 21UR-11170  | 18.0 | 6.0  | 10.0 | 4.0  | 1.0  | 0.0 |
| 21UR-111710 | 2.0  | 0.0  | 1.0  | 0.0  | 1.2  | 1.0 |
| 21UR-111720 | 0.0  | 0.0  | 0.0  | 0.0  | 0.0  | 0.0 |
| 21UR-111730 | 0.0  | 0.0  | 0.0  | 0.0  | 0.0  | 0.0 |
| 21UR-111740 | 0.0  | 0.0  | 0.0  | 0.0  | 0.0  | 0.0 |
| 21UR-111750 | 0.0  | 0.0  | 0.0  | 0.0  | 0.0  | 0.0 |
| 21UR-111760 | 0.0  | 0.0  | 0.0  | 0.0  | 0.0  | 0.0 |
| 21UR-111770 | 0.0  | 0.0  | 0.0  | 0.0  | 0.0  | 0.0 |

|             |       |      |       |       |       |     |
|-------------|-------|------|-------|-------|-------|-----|
| 21UR-111780 | 0.0   | 0.0  | 0.0   | 0.0   | 0.0   | 0.0 |
| 21UR-111790 | 0.0   | 1.0  | 1.0   | 0.0   | 0.0   | 0.0 |
| 21UR-11180  | 1.0   | 1.0  | 1.0   | 0.0   | 4.0   | 0.0 |
| 21UR-111800 | 8.0   | 0.0  | 8.0   | 1.0   | 1.0   | 0.0 |
| 21UR-111810 | 21.0  | 2.0  | 27.0  | 5.0   | 4.0   | 0.0 |
| 21UR-111820 | 0.0   | 0.0  | 0.0   | 0.0   | 0.0   | 0.0 |
| 21UR-111830 | 2.0   | 1.0  | 2.0   | 1.0   | 0.2   | 0.0 |
| 21UR-111840 | 0.0   | 0.0  | 0.0   | 0.0   | 4.0   | 0.0 |
| 21UR-111850 | 0.0   | 0.0  | 0.0   | 0.0   | 0.0   | 0.0 |
| 21UR-111860 | 0.0   | 0.0  | 0.0   | 0.0   | 0.0   | 0.0 |
| 21UR-111870 | 3.0   | 4.0  | 2.0   | 2.0   | 2.0   | 0.0 |
| 21UR-111880 | 1.0   | 0.0  | 0.0   | 0.0   | 1.0   | 0.0 |
| 21UR-111890 | 0.0   | 0.0  | 0.0   | 0.0   | 0.0   | 0.0 |
| 21UR-11190  | 0.0   | 0.0  | 0.0   | 0.0   | 0.0   | 0.0 |
| 21UR-111900 | 0.0   | 0.0  | 0.0   | 0.0   | 0.0   | 0.0 |
| 21UR-111910 | 1.0   | 1.0  | 0.0   | 0.0   | 1.0   | 0.0 |
| 21UR-111920 | 0.0   | 1.0  | 0.0   | 0.0   | 0.0   | 0.0 |
| 21UR-111930 | 0.0   | 0.0  | 0.0   | 0.0   | 0.0   | 0.0 |
| 21UR-111940 | 0.0   | 0.0  | 0.0   | 0.0   | 0.0   | 0.0 |
| 21UR-111950 | 1.0   | 0.0  | 0.0   | 0.0   | 0.0   | 0.0 |
| 21UR-111960 | 0.0   | 0.0  | 0.0   | 0.0   | 1.0   | 0.0 |
| 21UR-111970 | 0.0   | 0.0  | 0.0   | 0.0   | 0.0   | 0.0 |
| 21UR-111980 | 0.0   | 0.0  | 0.0   | 0.0   | 0.0   | 0.0 |
| 21UR-111990 | 0.0   | 1.0  | 0.0   | 0.0   | 0.0   | 0.0 |
| 21UR-1120   | 2.0   | 0.0  | 6.0   | 0.0   | 0.0   | 0.0 |
| 21UR-11200  | 0.0   | 1.0  | 0.0   | 0.0   | 3.0   | 0.0 |
| 21UR-112000 | 0.0   | 0.0  | 0.0   | 0.0   | 0.0   | 0.0 |
| 21UR-112010 | 0.0   | 0.0  | 0.0   | 1.0   | 0.0   | 0.0 |
| 21UR-112020 | 0.0   | 0.0  | 0.0   | 0.0   | 0.0   | 0.0 |
| 21UR-112030 | 2.0   | 0.0  | 6.0   | 0.0   | 3.0   | 1.0 |
| 21UR-112040 | 0.0   | 1.1  | 2.0   | 0.0   | 0.0   | 0.0 |
| 21UR-112050 | 0.0   | 1.0  | 0.0   | 0.0   | 0.0   | 3.0 |
| 21UR-112060 | 3.0   | 6.0  | 1.0   | 2.0   | 21.0  | 0.0 |
| 21UR-112070 | 0.0   | 0.0  | 0.0   | 0.0   | 0.0   | 0.0 |
| 21UR-112080 | 0.0   | 1.0  | 0.0   | 0.0   | 0.0   | 0.0 |
| 21UR-112090 | 0.0   | 0.0  | 0.0   | 0.0   | 1.0   | 0.0 |
| 21UR-11210  | 6.0   | 14.0 | 11.0  | 10.0  | 17.0  | 6.0 |
| 21UR-112100 | 2.0   | 0.0  | 1.0   | 0.0   | 0.1   | 0.0 |
| 21UR-112110 | 0.0   | 6.0  | 0.0   | 1.0   | 1.0   | 2.0 |
| 21UR-112120 | 2.0   | 1.0  | 1.0   | 1.0   | 3.0   | 0.0 |
| 21UR-112130 | 0.0   | 0.0  | 0.0   | 0.0   | 0.0   | 0.0 |
| 21UR-112140 | 1.0   | 0.0  | 0.0   | 0.0   | 0.0   | 0.0 |
| 21UR-112150 | 0.0   | 0.0  | 4.0   | 1.0   | 0.0   | 0.0 |
| 21UR-112160 | 2.0   | 1.0  | 0.0   | 0.0   | 1.0   | 0.0 |
| 21UR-112170 | 0.0   | 0.0  | 1.0   | 0.0   | 0.0   | 0.0 |
| 21UR-112180 | 0.0   | 0.0  | 1.0   | 0.0   | 0.0   | 0.0 |
| 21UR-112190 | 0.0   | 0.0  | 0.0   | 0.0   | 0.0   | 0.0 |
| 21UR-11220  | 140.0 | 48.0 | 133.0 | 119.0 | 179.0 | 9.0 |
| 21UR-112200 | 0.0   | 0.0  | 0.0   | 0.0   | 0.0   | 0.0 |
| 21UR-112210 | 6.0   | 2.0  | 9.0   | 2.0   | 5.0   | 0.0 |
| 21UR-112220 | 0.0   | 0.0  | 0.0   | 0.0   | 0.0   | 0.0 |

|             |        |       |        |       |      |     |
|-------------|--------|-------|--------|-------|------|-----|
| 21UR-112230 | 0.0    | 0.0   | 0.0    | 0.0   | 0.0  | 0.0 |
| 21UR-112240 | 1381.9 | 136.0 | 1154.5 | 683.0 | 78.0 | 5.0 |
| 21UR-112250 | 1.0    | 4.0   | 2.0    | 0.0   | 0.0  | 0.0 |
| 21UR-112260 | 19.0   | 3.0   | 21.0   | 6.0   | 3.0  | 0.0 |
| 21UR-112270 | 1.0    | 0.0   | 0.0    | 0.0   | 0.0  | 0.0 |
| 21UR-112280 | 0.0    | 0.0   | 0.0    | 0.0   | 1.0  | 0.0 |
| 21UR-112290 | 0.0    | 0.0   | 1.0    | 0.0   | 0.0  | 0.0 |
| 21UR-11230  | 0.0    | 0.0   | 0.0    | 0.0   | 0.0  | 0.0 |
| 21UR-112300 | 0.0    | 0.0   | 0.0    | 0.0   | 0.0  | 0.0 |
| 21UR-112310 | 0.0    | 0.0   | 0.0    | 0.0   | 0.0  | 0.0 |
| 21UR-112320 | 0.0    | 1.0   | 1.0    | 0.0   | 0.0  | 0.0 |
| 21UR-112330 | 1.0    | 3.0   | 4.0    | 0.0   | 1.0  | 4.0 |
| 21UR-112340 | 4.0    | 0.0   | 0.0    | 0.0   | 0.0  | 0.0 |
| 21UR-112350 | 0.0    | 0.0   | 0.0    | 0.0   | 0.0  | 0.0 |
| 21UR-112360 | 2.0    | 9.0   | 1.0    | 0.0   | 0.0  | 2.0 |
| 21UR-112370 | 0.0    | 0.0   | 0.0    | 0.0   | 0.0  | 0.0 |
| 21UR-112380 | 1.0    | 1.0   | 0.0    | 0.0   | 1.0  | 0.0 |
| 21UR-112390 | 0.0    | 0.0   | 0.0    | 0.0   | 0.0  | 0.0 |
| 21UR-11240  | 11.0   | 8.0   | 7.0    | 3.0   | 0.0  | 0.0 |
| 21UR-112400 | 13.0   | 1.0   | 6.0    | 1.0   | 0.0  | 0.0 |
| 21UR-112410 | 0.0    | 0.0   | 0.0    | 0.0   | 0.0  | 0.0 |
| 21UR-112420 | 0.0    | 0.0   | 0.0    | 0.0   | 0.0  | 0.0 |
| 21UR-112430 | 0.0    | 0.0   | 0.0    | 0.0   | 0.0  | 0.0 |
| 21UR-112440 | 0.0    | 0.0   | 0.0    | 0.0   | 0.0  | 0.0 |
| 21UR-112450 | 1.0    | 7.1   | 1.0    | 0.0   | 3.0  | 0.0 |
| 21UR-112460 | 0.0    | 0.0   | 0.0    | 0.0   | 0.0  | 0.0 |
| 21UR-112470 | 0.0    | 0.0   | 0.0    | 0.0   | 0.0  | 0.0 |
| 21UR-112480 | 1.0    | 0.0   | 2.0    | 2.0   | 12.0 | 0.0 |
| 21UR-112490 | 0.0    | 0.0   | 0.0    | 0.0   | 0.0  | 0.0 |
| 21UR-11250  | 0.0    | 0.0   | 0.0    | 0.0   | 1.0  | 1.0 |
| 21UR-112500 | 0.0    | 0.0   | 0.0    | 0.0   | 0.0  | 0.0 |
| 21UR-112510 | 0.0    | 0.0   | 0.0    | 0.0   | 0.0  | 0.0 |
| 21UR-112520 | 1.0    | 1.0   | 1.0    | 0.0   | 3.0  | 0.0 |
| 21UR-112530 | 0.0    | 0.0   | 0.0    | 0.0   | 0.0  | 0.0 |
| 21UR-112540 | 0.0    | 0.0   | 0.0    | 0.0   | 0.0  | 1.0 |
| 21UR-112550 | 0.0    | 0.0   | 1.0    | 0.0   | 0.0  | 1.0 |
| 21UR-112560 | 14.0   | 12.0  | 6.0    | 0.0   | 46.0 | 2.0 |
| 21UR-112570 | 0.0    | 0.0   | 0.0    | 0.0   | 0.0  | 0.0 |
| 21UR-112580 | 0.0    | 0.0   | 0.0    | 0.0   | 0.0  | 0.0 |
| 21UR-112590 | 12.0   | 28.0  | 11.0   | 3.0   | 37.3 | 2.0 |
| 21UR-11260  | 16.0   | 16.0  | 18.0   | 4.0   | 19.0 | 1.0 |
| 21UR-112600 | 2.0    | 0.0   | 1.0    | 1.0   | 0.0  | 0.0 |
| 21UR-112610 | 0.0    | 0.0   | 0.0    | 0.0   | 0.0  | 0.0 |
| 21UR-112620 | 0.0    | 0.0   | 1.0    | 0.0   | 0.0  | 0.0 |
| 21UR-112630 | 0.0    | 0.0   | 0.0    | 0.0   | 0.0  | 0.0 |
| 21UR-112640 | 0.0    | 0.0   | 0.0    | 0.0   | 0.0  | 0.0 |
| 21UR-112650 | 0.0    | 0.0   | 0.0    | 0.0   | 0.0  | 0.0 |
| 21UR-112660 | 0.0    | 6.0   | 0.0    | 0.0   | 0.0  | 0.0 |
| 21UR-112670 | 0.0    | 0.0   | 0.0    | 0.0   | 0.0  | 0.0 |
| 21UR-112680 | 0.0    | 0.0   | 0.0    | 0.0   | 0.0  | 0.7 |
| 21UR-112690 | 0.0    | 0.0   | 0.0    | 0.0   | 0.0  | 0.0 |

|             |      |      |      |      |       |     |
|-------------|------|------|------|------|-------|-----|
| 21UR-11270  | 1.0  | 8.0  | 1.0  | 0.0  | 4.0   | 0.0 |
| 21UR-112700 | 1.0  | 1.0  | 0.0  | 0.0  | 1.0   | 0.0 |
| 21UR-112710 | 0.0  | 0.0  | 0.0  | 0.0  | 0.0   | 0.0 |
| 21UR-112720 | 0.0  | 0.0  | 0.0  | 0.0  | 5.0   | 0.0 |
| 21UR-112740 | 0.0  | 0.0  | 0.0  | 0.0  | 0.0   | 0.0 |
| 21UR-112750 | 0.0  | 0.0  | 0.0  | 0.0  | 0.0   | 0.0 |
| 21UR-112770 | 1.0  | 0.0  | 0.0  | 0.0  | 0.0   | 0.0 |
| 21UR-112780 | 12.0 | 0.0  | 6.0  | 1.0  | 1.0   | 0.0 |
| 21UR-112790 | 0.0  | 0.0  | 0.0  | 0.0  | 0.0   | 0.0 |
| 21UR-11280  | 6.0  | 3.0  | 1.0  | 0.0  | 1.0   | 0.0 |
| 21UR-112800 | 0.0  | 0.0  | 0.0  | 0.0  | 0.0   | 0.0 |
| 21UR-112810 | 0.0  | 0.0  | 0.0  | 0.0  | 0.0   | 0.0 |
| 21UR-112820 | 0.0  | 0.0  | 0.0  | 0.0  | 0.0   | 0.0 |
| 21UR-112830 | 0.0  | 1.0  | 1.0  | 0.0  | 1.0   | 0.0 |
| 21UR-112850 | 45.0 | 26.0 | 32.0 | 16.0 | 41.0  | 9.0 |
| 21UR-112860 | 0.0  | 0.0  | 1.0  | 0.0  | 0.0   | 0.0 |
| 21UR-112870 | 1.0  | 0.0  | 8.0  | 0.0  | 0.0   | 0.0 |
| 21UR-112890 | 0.0  | 0.0  | 0.0  | 0.0  | 0.0   | 0.0 |
| 21UR-11290  | 4.0  | 45.0 | 1.0  | 6.0  | 142.0 | 6.0 |
| 21UR-112900 | 0.0  | 0.0  | 0.0  | 0.0  | 0.0   | 0.0 |
| 21UR-112910 | 0.0  | 0.0  | 0.0  | 0.0  | 0.0   | 0.0 |
| 21UR-112920 | 0.0  | 0.0  | 0.0  | 0.0  | 0.0   | 0.0 |
| 21UR-112930 | 0.0  | 0.0  | 0.0  | 0.0  | 1.0   | 0.0 |
| 21UR-112940 | 0.0  | 0.0  | 0.0  | 0.0  | 0.0   | 0.0 |
| 21UR-112950 | 1.0  | 0.0  | 0.0  | 0.0  | 1.0   | 0.0 |
| 21UR-112960 | 0.0  | 0.0  | 0.0  | 0.0  | 0.0   | 0.0 |
| 21UR-112970 | 0.0  | 0.0  | 0.0  | 0.0  | 0.0   | 0.0 |
| 21UR-112980 | 0.0  | 1.0  | 1.0  | 0.0  | 0.0   | 0.0 |
| 21UR-112990 | 0.0  | 0.0  | 0.0  | 0.0  | 0.0   | 0.0 |
| 21UR-1130   | 0.0  | 0.0  | 0.0  | 0.0  | 3.0   | 0.0 |
| 21UR-11300  | 16.0 | 7.0  | 16.0 | 1.0  | 16.0  | 1.0 |
| 21UR-113000 | 0.0  | 0.0  | 0.0  | 0.0  | 0.0   | 0.0 |
| 21UR-113010 | 14.0 | 1.1  | 3.0  | 1.0  | 0.0   | 0.0 |
| 21UR-113020 | 0.0  | 0.0  | 0.0  | 0.0  | 0.0   | 0.0 |
| 21UR-113030 | 0.0  | 0.0  | 0.0  | 0.0  | 1.0   | 0.0 |
| 21UR-113040 | 0.0  | 0.0  | 0.0  | 0.0  | 0.0   | 0.0 |
| 21UR-113050 | 0.0  | 0.0  | 0.0  | 0.0  | 0.0   | 0.0 |
| 21UR-113060 | 34.3 | 5.0  | 15.3 | 3.0  | 8.3   | 0.0 |
| 21UR-113080 | 1.0  | 1.0  | 1.0  | 0.0  | 0.0   | 0.0 |
| 21UR-113090 | 0.0  | 0.0  | 0.0  | 0.0  | 0.0   | 0.0 |
| 21UR-11310  | 0.0  | 0.0  | 0.0  | 0.0  | 0.0   | 0.0 |
| 21UR-113100 | 9.0  | 0.0  | 17.0 | 1.0  | 2.0   | 0.0 |
| 21UR-113110 | 0.0  | 1.0  | 0.0  | 0.0  | 0.0   | 4.0 |
| 21UR-113120 | 0.0  | 0.0  | 0.0  | 0.0  | 0.0   | 0.0 |
| 21UR-113130 | 0.0  | 0.0  | 2.0  | 0.0  | 0.0   | 0.0 |
| 21UR-113140 | 0.0  | 1.0  | 0.0  | 0.0  | 1.0   | 0.0 |
| 21UR-113150 | 0.0  | 0.0  | 0.0  | 0.0  | 0.0   | 0.0 |
| 21UR-113160 | 0.0  | 0.0  | 0.0  | 0.0  | 0.0   | 0.0 |
| 21UR-113170 | 0.0  | 0.0  | 0.0  | 0.0  | 0.0   | 0.0 |
| 21UR-113180 | 0.0  | 0.0  | 0.0  | 0.0  | 0.0   | 0.0 |
| 21UR-113190 | 0.0  | 0.0  | 0.0  | 0.0  | 1.0   | 0.0 |



|             |      |      |      |      |      |     |
|-------------|------|------|------|------|------|-----|
| 21UR-11320  | 1.0  | 1.0  | 1.0  | 0.0  | 1.0  | 0.0 |
| 21UR-113200 | 0.0  | 0.0  | 0.0  | 0.0  | 0.0  | 0.0 |
| 21UR-113210 | 0.0  | 0.0  | 0.0  | 0.0  | 0.0  | 0.0 |
| 21UR-113220 | 0.0  | 0.0  | 0.0  | 0.0  | 1.0  | 0.0 |
| 21UR-113230 | 0.0  | 0.0  | 0.0  | 0.0  | 0.0  | 0.0 |
| 21UR-113240 | 0.0  | 0.0  | 0.0  | 0.0  | 0.0  | 0.0 |
| 21UR-113250 | 0.0  | 0.0  | 1.0  | 0.0  | 0.0  | 0.0 |
| 21UR-113260 | 0.0  | 1.0  | 0.0  | 0.0  | 0.0  | 0.0 |
| 21UR-113270 | 0.0  | 0.0  | 0.0  | 0.0  | 0.0  | 0.0 |
| 21UR-113280 | 0.0  | 0.0  | 0.0  | 0.0  | 0.0  | 0.0 |
| 21UR-113290 | 0.0  | 1.0  | 0.0  | 0.0  | 3.0  | 0.0 |
| 21UR-11330  | 0.0  | 1.0  | 1.0  | 0.0  | 0.0  | 1.0 |
| 21UR-113300 | 0.0  | 0.0  | 0.0  | 0.0  | 0.0  | 0.0 |
| 21UR-113310 | 0.0  | 0.0  | 0.0  | 0.0  | 0.0  | 0.0 |
| 21UR-113320 | 16.1 | 5.0  | 14.0 | 0.0  | 9.0  | 3.0 |
| 21UR-113330 | 23.0 | 30.0 | 13.0 | 11.0 | 18.0 | 0.0 |
| 21UR-113340 | 1.0  | 0.0  | 1.0  | 0.0  | 1.0  | 0.0 |
| 21UR-113350 | 1.0  | 0.0  | 2.0  | 0.0  | 4.0  | 1.0 |
| 21UR-113360 | 0.0  | 0.0  | 0.0  | 0.0  | 0.0  | 0.0 |
| 21UR-113370 | 0.0  | 1.0  | 0.0  | 0.0  | 1.0  | 0.0 |
| 21UR-113380 | 0.0  | 0.0  | 0.0  | 0.0  | 0.0  | 0.0 |
| 21UR-113390 | 0.0  | 0.0  | 0.0  | 0.0  | 0.0  | 0.0 |
| 21UR-11340  | 22.0 | 2.0  | 14.0 | 0.0  | 17.0 | 8.0 |
| 21UR-113400 | 18.0 | 2.0  | 17.0 | 5.0  | 3.0  | 1.0 |
| 21UR-113410 | 1.0  | 0.0  | 1.0  | 1.0  | 0.0  | 0.0 |
| 21UR-113420 | 0.0  | 0.0  | 0.0  | 0.0  | 0.0  | 0.0 |
| 21UR-113430 | 1.2  | 0.0  | 0.0  | 0.0  | 0.0  | 0.0 |
| 21UR-113440 | 0.0  | 0.0  | 0.0  | 0.0  | 0.0  | 0.0 |
| 21UR-113450 | 0.0  | 0.0  | 0.0  | 0.0  | 0.0  | 0.0 |
| 21UR-113460 | 0.0  | 1.0  | 0.0  | 0.0  | 0.0  | 0.0 |
| 21UR-113470 | 4.0  | 0.0  | 0.0  | 0.0  | 0.0  | 0.0 |
| 21UR-113480 | 0.0  | 0.0  | 0.0  | 0.0  | 0.0  | 0.0 |
| 21UR-113490 | 0.0  | 0.0  | 0.0  | 0.0  | 0.0  | 0.0 |
| 21UR-11350  | 0.0  | 4.0  | 0.0  | 0.0  | 0.0  | 0.0 |
| 21UR-113500 | 7.0  | 16.0 | 8.0  | 3.0  | 18.0 | 1.0 |
| 21UR-113510 | 3.0  | 1.0  | 1.0  | 0.0  | 0.0  | 0.0 |
| 21UR-113520 | 0.0  | 0.0  | 0.0  | 0.0  | 0.0  | 0.0 |
| 21UR-113530 | 0.0  | 0.0  | 0.0  | 0.0  | 0.0  | 0.0 |
| 21UR-113540 | 0.0  | 6.5  | 1.0  | 0.0  | 1.0  | 0.0 |
| 21UR-113550 | 0.0  | 0.0  | 0.0  | 0.0  | 0.0  | 0.0 |
| 21UR-113570 | 0.0  | 0.0  | 0.0  | 0.0  | 0.0  | 0.0 |
| 21UR-113580 | 0.0  | 0.0  | 0.0  | 0.0  | 0.0  | 0.0 |
| 21UR-113590 | 0.0  | 0.0  | 0.0  | 0.0  | 1.0  | 0.0 |
| 21UR-113600 | 0.0  | 0.0  | 0.0  | 0.0  | 0.0  | 0.0 |
| 21UR-113610 | 1.0  | 0.0  | 4.0  | 0.0  | 1.0  | 0.0 |
| 21UR-113620 | 1.0  | 0.0  | 0.0  | 0.0  | 0.0  | 0.0 |
| 21UR-113630 | 0.0  | 0.0  | 0.0  | 0.0  | 0.0  | 0.0 |
| 21UR-113640 | 0.0  | 0.0  | 0.0  | 0.0  | 0.0  | 0.0 |
| 21UR-113650 | 0.0  | 0.0  | 0.0  | 0.0  | 0.0  | 1.0 |
| 21UR-113660 | 1.0  | 0.0  | 2.0  | 0.0  | 1.0  | 0.0 |
| 21UR-113670 | 0.0  | 2.0  | 0.0  | 0.0  | 0.0  | 0.0 |

|             |       |       |       |       |       |     |
|-------------|-------|-------|-------|-------|-------|-----|
| 21UR-113680 | 0.0   | 0.0   | 0.0   | 0.0   | 0.0   | 0.0 |
| 21UR-113690 | 0.0   | 0.0   | 0.0   | 0.0   | 0.0   | 0.0 |
| 21UR-11370  | 349.0 | 137.0 | 259.5 | 201.0 | 218.0 | 2.0 |
| 21UR-113700 | 0.0   | 1.0   | 0.0   | 0.0   | 2.0   | 0.0 |
| 21UR-113710 | 0.0   | 0.0   | 0.0   | 0.0   | 0.0   | 0.0 |
| 21UR-113730 | 0.0   | 0.0   | 0.0   | 0.0   | 0.0   | 0.0 |
| 21UR-113740 | 0.0   | 0.0   | 1.0   | 0.0   | 0.0   | 0.1 |
| 21UR-113750 | 0.0   | 0.0   | 0.0   | 0.0   | 0.0   | 0.0 |
| 21UR-113760 | 0.0   | 0.0   | 0.0   | 0.0   | 0.0   | 0.0 |
| 21UR-113770 | 1.0   | 0.0   | 1.0   | 0.0   | 0.3   | 1.0 |
| 21UR-113780 | 0.0   | 1.0   | 0.0   | 0.0   | 10.0  | 0.0 |
| 21UR-113790 | 0.0   | 1.0   | 0.0   | 0.0   | 1.0   | 0.0 |
| 21UR-11380  | 0.0   | 0.0   | 0.0   | 0.0   | 0.0   | 0.0 |
| 21UR-113800 | 1.0   | 0.0   | 0.0   | 1.0   | 0.0   | 0.0 |
| 21UR-113810 | 0.0   | 1.0   | 4.0   | 0.0   | 0.0   | 0.0 |
| 21UR-113820 | 0.0   | 0.0   | 0.0   | 0.0   | 0.0   | 0.0 |
| 21UR-113830 | 0.0   | 0.0   | 0.0   | 0.0   | 0.0   | 0.0 |
| 21UR-113840 | 0.0   | 0.0   | 0.0   | 0.0   | 0.0   | 0.0 |
| 21UR-113850 | 15.0  | 8.0   | 22.0  | 6.0   | 4.0   | 1.0 |
| 21UR-113860 | 1.0   | 9.0   | 1.0   | 1.0   | 7.0   | 1.0 |
| 21UR-113870 | 0.0   | 0.0   | 0.0   | 0.0   | 0.0   | 0.0 |
| 21UR-113880 | 0.0   | 0.0   | 0.0   | 0.0   | 0.0   | 0.0 |
| 21UR-113890 | 1.0   | 0.5   | 1.0   | 0.0   | 0.0   | 0.0 |
| 21UR-11390  | 1.0   | 4.0   | 0.0   | 0.0   | 3.0   | 0.0 |
| 21UR-113900 | 0.0   | 0.0   | 0.0   | 0.0   | 0.0   | 0.0 |
| 21UR-113910 | 1.0   | 1.0   | 0.0   | 0.0   | 3.0   | 0.0 |
| 21UR-113920 | 0.0   | 0.0   | 0.0   | 0.0   | 0.0   | 0.0 |
| 21UR-113930 | 21.0  | 2.0   | 27.0  | 5.0   | 4.0   | 0.0 |
| 21UR-113940 | 0.0   | 0.0   | 0.0   | 0.0   | 0.0   | 0.0 |
| 21UR-113950 | 3.0   | 2.0   | 9.0   | 3.0   | 1.0   | 0.0 |
| 21UR-113960 | 0.0   | 0.0   | 0.0   | 0.0   | 0.0   | 0.0 |
| 21UR-113970 | 0.0   | 0.0   | 0.0   | 0.0   | 0.0   | 0.0 |
| 21UR-113980 | 0.0   | 1.0   | 0.0   | 0.0   | 0.0   | 0.0 |
| 21UR-113990 | 0.0   | 0.0   | 0.0   | 0.0   | 0.0   | 0.0 |
| 21UR-1140   | 4.0   | 0.0   | 1.0   | 0.0   | 1.0   | 0.0 |
| 21UR-11400  | 0.0   | 0.0   | 0.0   | 0.0   | 0.0   | 0.0 |
| 21UR-114000 | 3.0   | 0.0   | 3.0   | 0.0   | 6.0   | 0.0 |
| 21UR-114010 | 0.0   | 0.0   | 2.0   | 0.0   | 0.0   | 0.0 |
| 21UR-114020 | 1.0   | 10.0  | 1.0   | 2.0   | 4.0   | 0.0 |
| 21UR-114030 | 4.0   | 0.0   | 6.0   | 2.0   | 0.0   | 1.0 |
| 21UR-114040 | 0.0   | 0.0   | 0.0   | 0.0   | 1.0   | 1.0 |
| 21UR-114050 | 6.0   | 4.0   | 12.0  | 2.0   | 2.0   | 0.0 |
| 21UR-114060 | 0.0   | 0.0   | 0.0   | 0.0   | 0.0   | 0.0 |
| 21UR-114070 | 0.0   | 0.0   | 0.0   | 0.0   | 0.0   | 0.0 |
| 21UR-114080 | 0.0   | 0.0   | 2.0   | 0.0   | 0.0   | 0.0 |
| 21UR-114090 | 0.0   | 0.0   | 1.0   | 0.0   | 0.0   | 0.0 |
| 21UR-11410  | 0.0   | 0.0   | 1.0   | 0.0   | 0.0   | 0.0 |
| 21UR-114100 | 3.0   | 6.0   | 0.0   | 0.0   | 5.0   | 0.0 |
| 21UR-114110 | 0.0   | 0.0   | 0.0   | 0.0   | 0.0   | 0.0 |
| 21UR-114120 | 8.0   | 5.0   | 5.0   | 2.0   | 6.0   | 1.0 |
| 21UR-114130 | 1.0   | 1.0   | 2.0   | 0.0   | 0.0   | 0.0 |

|             |         |       |        |        |       |      |
|-------------|---------|-------|--------|--------|-------|------|
| 21UR-114140 | 10605.6 | 801.0 | 7789.6 | 2755.7 | 650.0 | 79.0 |
| 21UR-114150 | 340.0   | 201.0 | 292.0  | 91.0   | 183.0 | 7.0  |
| 21UR-114160 | 0.0     | 0.0   | 0.0    | 1.0    | 0.0   | 0.0  |
| 21UR-114170 | 0.0     | 0.0   | 0.0    | 0.0    | 0.0   | 0.0  |
| 21UR-114180 | 64.0    | 14.0  | 53.0   | 26.0   | 27.0  | 4.0  |
| 21UR-114190 | 0.0     | 0.0   | 0.0    | 0.0    | 0.0   | 0.0  |
| 21UR-11420  | 0.0     | 13.0  | 0.0    | 0.0    | 0.0   | 0.0  |
| 21UR-114200 | 10.0    | 0.0   | 10.0   | 2.0    | 0.0   | 0.0  |
| 21UR-114210 | 0.0     | 0.0   | 0.0    | 0.0    | 0.0   | 0.0  |
| 21UR-114230 | 0.0     | 0.0   | 0.0    | 0.0    | 0.0   | 0.0  |
| 21UR-114240 | 218.0   | 36.0  | 151.5  | 86.0   | 31.0  | 9.0  |
| 21UR-114250 | 12.0    | 1.0   | 6.0    | 0.0    | 0.0   | 0.0  |
| 21UR-114260 | 0.0     | 2.0   | 0.0    | 0.0    | 0.0   | 0.0  |
| 21UR-114270 | 0.0     | 1.0   | 0.0    | 0.0    | 0.0   | 0.0  |
| 21UR-114280 | 1.0     | 0.0   | 0.0    | 0.0    | 1.0   | 0.1  |
| 21UR-114290 | 0.0     | 0.0   | 0.0    | 0.0    | 0.0   | 0.0  |
| 21UR-11430  | 24.0    | 35.8  | 21.0   | 16.0   | 63.0  | 0.0  |
| 21UR-114300 | 1.0     | 1.0   | 0.0    | 0.0    | 0.1   | 1.0  |
| 21UR-114310 | 0.0     | 0.0   | 0.0    | 0.0    | 0.0   | 0.0  |
| 21UR-114320 | 0.0     | 0.0   | 0.0    | 0.0    | 1.0   | 0.0  |
| 21UR-114330 | 0.0     | 0.0   | 0.0    | 0.0    | 1.3   | 0.0  |
| 21UR-114340 | 2.0     | 0.0   | 0.0    | 0.0    | 0.0   | 0.0  |
| 21UR-114350 | 10.0    | 4.0   | 33.0   | 6.0    | 1.0   | 0.0  |
| 21UR-114360 | 0.0     | 0.0   | 0.0    | 0.0    | 0.0   | 0.0  |
| 21UR-114380 | 0.0     | 0.0   | 0.0    | 0.0    | 0.0   | 0.0  |
| 21UR-114390 | 0.0     | 0.0   | 0.0    | 0.0    | 0.0   | 0.0  |
| 21UR-11440  | 0.0     | 0.0   | 0.0    | 0.0    | 0.0   | 0.0  |
| 21UR-114400 | 0.0     | 0.0   | 0.0    | 0.0    | 0.0   | 0.0  |
| 21UR-114410 | 0.0     | 0.0   | 0.0    | 0.0    | 0.0   | 0.0  |
| 21UR-114420 | 1.0     | 0.0   | 0.0    | 1.0    | 0.0   | 0.0  |
| 21UR-114430 | 15.0    | 8.0   | 19.0   | 2.0    | 7.0   | 2.0  |
| 21UR-114440 | 0.0     | 2.0   | 0.0    | 0.0    | 2.0   | 0.0  |
| 21UR-114450 | 0.0     | 1.0   | 1.0    | 0.0    | 1.0   | 0.0  |
| 21UR-114460 | 1.0     | 1.0   | 0.0    | 0.0    | 0.0   | 1.0  |
| 21UR-114470 | 0.0     | 0.0   | 0.0    | 0.0    | 0.0   | 0.0  |
| 21UR-114480 | 10.0    | 6.0   | 15.0   | 7.0    | 18.0  | 0.0  |
| 21UR-114490 | 0.0     | 0.0   | 0.0    | 0.0    | 0.0   | 1.0  |
| 21UR-11450  | 2.0     | 0.0   | 0.0    | 0.0    | 1.0   | 0.0  |
| 21UR-114500 | 0.0     | 0.0   | 0.0    | 0.0    | 0.0   | 0.0  |
| 21UR-114510 | 2.0     | 1.0   | 2.0    | 2.0    | 8.0   | 0.5  |
| 21UR-114520 | 0.0     | 0.0   | 0.0    | 0.0    | 1.0   | 0.0  |
| 21UR-114530 | 0.0     | 0.0   | 0.0    | 0.0    | 0.0   | 0.0  |
| 21UR-114540 | 0.0     | 0.0   | 1.0    | 1.0    | 0.0   | 0.0  |
| 21UR-114550 | 15.0    | 10.0  | 26.0   | 6.0    | 21.0  | 0.0  |
| 21UR-114570 | 0.0     | 0.0   | 1.0    | 0.0    | 0.0   | 0.0  |
| 21UR-114580 | 1.0     | 5.0   | 0.0    | 0.0    | 0.0   | 2.0  |
| 21UR-114590 | 0.0     | 1.0   | 1.0    | 0.0    | 0.0   | 0.0  |
| 21UR-11460  | 150.0   | 24.0  | 136.0  | 57.0   | 18.1  | 16.0 |
| 21UR-114600 | 0.0     | 0.0   | 0.0    | 0.0    | 0.0   | 0.0  |
| 21UR-114610 | 0.0     | 0.0   | 0.0    | 0.0    | 0.0   | 0.0  |
| 21UR-114620 | 0.0     | 0.0   | 0.0    | 0.0    | 0.0   | 0.0  |

|             |      |      |      |      |      |     |
|-------------|------|------|------|------|------|-----|
| 21UR-114630 | 1.0  | 1.0  | 1.0  | 0.0  | 2.0  | 0.0 |
| 21UR-114640 | 61.0 | 16.0 | 44.0 | 27.0 | 18.0 | 1.0 |
| 21UR-114650 | 0.0  | 1.0  | 0.0  | 0.0  | 0.0  | 0.0 |
| 21UR-114660 | 0.0  | 0.0  | 0.0  | 0.0  | 3.0  | 0.0 |
| 21UR-114670 | 1.0  | 1.0  | 0.0  | 1.0  | 0.0  | 0.0 |
| 21UR-114680 | 0.0  | 0.0  | 0.0  | 0.0  | 0.0  | 0.0 |
| 21UR-114690 | 6.0  | 0.1  | 16.0 | 1.0  | 0.0  | 0.0 |
| 21UR-114700 | 0.0  | 0.0  | 0.0  | 0.0  | 0.0  | 0.0 |
| 21UR-114710 | 0.0  | 1.0  | 0.0  | 0.0  | 1.0  | 0.0 |
| 21UR-114730 | 0.0  | 0.0  | 0.0  | 0.0  | 0.0  | 0.0 |
| 21UR-114740 | 0.0  | 0.0  | 0.0  | 0.0  | 0.0  | 0.0 |
| 21UR-114750 | 0.0  | 1.0  | 3.0  | 1.0  | 0.0  | 1.0 |
| 21UR-114760 | 0.0  | 0.0  | 0.0  | 0.0  | 1.0  | 0.0 |
| 21UR-114770 | 2.0  | 0.0  | 1.0  | 1.0  | 1.0  | 1.0 |
| 21UR-114780 | 0.0  | 0.0  | 0.0  | 0.0  | 0.0  | 0.0 |
| 21UR-114790 | 1.0  | 1.0  | 0.0  | 0.0  | 0.0  | 0.0 |
| 21UR-11480  | 7.0  | 2.0  | 2.0  | 0.0  | 14.0 | 0.0 |
| 21UR-114800 | 0.0  | 0.0  | 0.0  | 0.0  | 0.0  | 0.0 |
| 21UR-114810 | 0.0  | 0.0  | 0.0  | 0.0  | 0.0  | 0.0 |
| 21UR-114820 | 20.0 | 19.0 | 25.0 | 5.0  | 34.0 | 3.0 |
| 21UR-114830 | 0.0  | 0.0  | 0.0  | 0.0  | 0.0  | 0.0 |
| 21UR-114840 | 0.0  | 0.0  | 0.0  | 0.0  | 0.0  | 0.0 |
| 21UR-114850 | 0.0  | 1.0  | 1.0  | 1.0  | 1.0  | 0.0 |
| 21UR-114860 | 0.0  | 0.0  | 0.0  | 0.0  | 0.0  | 0.0 |
| 21UR-114870 | 0.0  | 0.0  | 0.0  | 0.0  | 0.0  | 0.0 |
| 21UR-114880 | 1.0  | 0.0  | 2.0  | 0.0  | 0.0  | 0.0 |
| 21UR-114890 | 0.0  | 0.0  | 0.0  | 0.0  | 0.0  | 0.0 |
| 21UR-11490  | 0.0  | 11.0 | 1.0  | 0.0  | 4.0  | 0.0 |
| 21UR-114900 | 0.0  | 0.0  | 0.0  | 0.0  | 0.0  | 0.0 |
| 21UR-114910 | 1.0  | 0.0  | 1.0  | 0.0  | 0.0  | 0.0 |
| 21UR-114920 | 0.0  | 0.0  | 0.0  | 0.0  | 0.0  | 0.0 |
| 21UR-114930 | 0.0  | 0.0  | 0.0  | 0.0  | 0.0  | 0.0 |
| 21UR-114940 | 36.5 | 3.0  | 32.0 | 7.0  | 7.0  | 0.0 |
| 21UR-114950 | 0.0  | 0.0  | 0.0  | 0.0  | 0.0  | 0.0 |
| 21UR-114960 | 0.0  | 7.0  | 1.0  | 0.0  | 4.0  | 0.0 |
| 21UR-114970 | 1.0  | 5.0  | 1.0  | 0.0  | 6.0  | 1.0 |
| 21UR-114980 | 0.0  | 0.0  | 1.0  | 0.0  | 0.0  | 0.0 |
| 21UR-114990 | 0.0  | 0.0  | 0.0  | 0.0  | 0.0  | 0.0 |
| 21UR-1150   | 0.0  | 0.0  | 0.0  | 0.0  | 0.0  | 0.0 |
| 21UR-11500  | 12.0 | 19.0 | 12.0 | 0.0  | 14.0 | 1.0 |
| 21UR-115000 | 0.0  | 0.0  | 0.0  | 0.0  | 0.0  | 0.0 |
| 21UR-115010 | 0.0  | 0.0  | 0.0  | 0.0  | 0.0  | 0.0 |
| 21UR-115020 | 6.0  | 2.0  | 2.0  | 1.0  | 0.0  | 0.0 |
| 21UR-115030 | 0.0  | 0.0  | 0.0  | 0.0  | 0.0  | 0.0 |
| 21UR-115040 | 0.0  | 1.1  | 0.0  | 0.0  | 0.0  | 0.0 |
| 21UR-115050 | 0.0  | 0.0  | 0.0  | 0.0  | 0.0  | 0.0 |
| 21UR-115060 | 6.0  | 3.5  | 7.0  | 1.0  | 2.0  | 1.0 |
| 21UR-115070 | 2.0  | 0.0  | 7.0  | 0.0  | 3.0  | 0.0 |
| 21UR-115080 | 0.0  | 0.0  | 0.0  | 0.0  | 1.0  | 0.0 |
| 21UR-115090 | 0.0  | 0.0  | 4.0  | 0.0  | 0.0  | 0.0 |
| 21UR-11510  | 0.0  | 0.0  | 0.0  | 0.0  | 0.0  | 0.0 |

|             |      |     |      |     |      |     |
|-------------|------|-----|------|-----|------|-----|
| 21UR-115100 | 0.0  | 0.0 | 0.0  | 0.0 | 0.0  | 0.0 |
| 21UR-115110 | 0.0  | 0.0 | 0.0  | 0.0 | 0.0  | 0.0 |
| 21UR-115120 | 0.0  | 0.0 | 0.0  | 0.0 | 0.0  | 0.0 |
| 21UR-115130 | 4.0  | 0.0 | 0.0  | 0.0 | 1.0  | 0.0 |
| 21UR-115140 | 0.0  | 0.0 | 0.0  | 0.0 | 0.0  | 0.0 |
| 21UR-115150 | 19.0 | 0.0 | 16.0 | 4.0 | 5.0  | 0.0 |
| 21UR-115160 | 0.0  | 0.0 | 3.0  | 0.0 | 0.0  | 0.0 |
| 21UR-115170 | 0.0  | 0.0 | 0.0  | 0.0 | 0.0  | 0.0 |
| 21UR-115180 | 1.0  | 0.0 | 1.0  | 1.0 | 0.0  | 0.0 |
| 21UR-115190 | 0.0  | 0.0 | 0.0  | 0.0 | 0.0  | 0.0 |
| 21UR-11520  | 10.0 | 4.0 | 12.0 | 1.0 | 24.0 | 0.0 |
| 21UR-115200 | 0.0  | 0.0 | 0.0  | 0.0 | 0.0  | 0.0 |
| 21UR-115210 | 24.0 | 8.0 | 22.0 | 6.0 | 17.0 | 1.0 |
| 21UR-115220 | 0.0  | 0.0 | 0.0  | 0.0 | 0.0  | 0.0 |
| 21UR-115230 | 1.0  | 1.0 | 1.0  | 0.0 | 0.0  | 0.0 |
| 21UR-115240 | 0.0  | 0.0 | 0.0  | 1.0 | 0.0  | 1.0 |
| 21UR-115250 | 0.0  | 0.0 | 1.0  | 0.0 | 0.0  | 0.0 |
| 21UR-115260 | 0.0  | 0.0 | 0.0  | 0.0 | 0.0  | 0.0 |
| 21UR-115270 | 0.0  | 0.0 | 0.0  | 0.0 | 0.0  | 0.0 |
| 21UR-115280 | 0.0  | 0.0 | 2.0  | 1.0 | 5.0  | 2.0 |
| 21UR-115290 | 0.0  | 0.0 | 0.0  | 0.0 | 0.0  | 0.0 |
| 21UR-11530  | 0.0  | 0.0 | 0.0  | 0.0 | 1.0  | 0.0 |
| 21UR-115300 | 0.0  | 0.0 | 0.0  | 0.0 | 0.0  | 0.0 |
| 21UR-115310 | 0.0  | 0.0 | 0.0  | 0.0 | 0.0  | 0.0 |
| 21UR-115320 | 0.0  | 0.0 | 0.0  | 0.0 | 0.0  | 0.0 |
| 21UR-115330 | 3.0  | 0.0 | 3.0  | 1.0 | 3.0  | 1.0 |
| 21UR-115340 | 0.0  | 0.0 | 0.0  | 0.0 | 0.0  | 0.0 |
| 21UR-115350 | 0.0  | 0.0 | 1.0  | 0.0 | 0.0  | 0.0 |
| 21UR-115360 | 0.0  | 0.0 | 0.0  | 0.0 | 0.0  | 0.0 |
| 21UR-115370 | 0.0  | 0.0 | 0.0  | 0.0 | 0.0  | 0.0 |
| 21UR-115380 | 0.0  | 0.0 | 0.0  | 0.0 | 0.0  | 0.0 |
| 21UR-115390 | 0.0  | 0.0 | 0.0  | 0.0 | 0.0  | 0.0 |
| 21UR-11540  | 0.0  | 1.0 | 1.0  | 0.0 | 1.0  | 1.0 |
| 21UR-115400 | 0.0  | 0.0 | 0.0  | 0.0 | 0.0  | 0.0 |
| 21UR-115410 | 0.0  | 0.0 | 0.0  | 0.0 | 0.0  | 0.0 |
| 21UR-115420 | 0.0  | 0.0 | 0.0  | 0.0 | 0.0  | 0.0 |
| 21UR-115430 | 1.0  | 0.0 | 1.0  | 0.0 | 3.0  | 0.0 |
| 21UR-115440 | 0.0  | 0.0 | 0.0  | 0.0 | 0.0  | 0.0 |
| 21UR-115450 | 0.0  | 0.0 | 0.0  | 0.0 | 0.0  | 0.0 |
| 21UR-115460 | 0.0  | 0.0 | 0.0  | 0.0 | 0.0  | 0.0 |
| 21UR-115470 | 0.0  | 0.0 | 0.0  | 0.0 | 0.0  | 0.0 |
| 21UR-115480 | 0.0  | 0.0 | 0.0  | 0.0 | 0.0  | 0.0 |
| 21UR-115490 | 0.0  | 0.0 | 0.0  | 0.0 | 0.0  | 0.0 |
| 21UR-11550  | 6.0  | 4.0 | 7.0  | 1.0 | 4.0  | 0.0 |
| 21UR-115500 | 0.0  | 0.0 | 0.0  | 0.0 | 0.0  | 0.0 |
| 21UR-115510 | 0.0  | 0.0 | 0.0  | 0.0 | 0.0  | 0.0 |
| 21UR-115520 | 0.0  | 0.0 | 0.0  | 0.0 | 0.0  | 0.0 |
| 21UR-115530 | 0.0  | 0.0 | 0.0  | 0.0 | 0.0  | 0.0 |
| 21UR-115540 | 0.0  | 0.0 | 0.0  | 0.0 | 0.0  | 0.0 |
| 21UR-115550 | 13.0 | 9.0 | 21.0 | 7.0 | 10.0 | 0.0 |
| 21UR-115560 | 0.0  | 1.0 | 0.0  | 0.0 | 2.0  | 0.0 |

|             |        |      |        |       |       |      |
|-------------|--------|------|--------|-------|-------|------|
| 21UR-115570 | 0.0    | 0.0  | 0.0    | 0.0   | 0.0   | 1.0  |
| 21UR-115580 | 0.0    | 0.0  | 2.0    | 1.0   | 2.2   | 0.0  |
| 21UR-115590 | 0.0    | 0.0  | 0.0    | 0.0   | 0.0   | 0.0  |
| 21UR-11560  | 12.0   | 9.0  | 28.0   | 6.0   | 107.0 | 0.0  |
| 21UR-115600 | 0.0    | 1.0  | 0.0    | 0.0   | 0.0   | 0.0  |
| 21UR-115610 | 0.0    | 0.1  | 1.0    | 0.0   | 0.0   | 0.0  |
| 21UR-115620 | 0.0    | 0.0  | 0.0    | 0.0   | 0.0   | 0.0  |
| 21UR-115630 | 0.0    | 0.0  | 0.0    | 0.0   | 0.1   | 0.0  |
| 21UR-115640 | 0.0    | 0.0  | 0.0    | 0.0   | 0.0   | 0.0  |
| 21UR-115650 | 0.0    | 0.0  | 0.0    | 0.0   | 0.0   | 0.0  |
| 21UR-115660 | 0.0    | 0.0  | 0.0    | 1.0   | 0.0   | 0.0  |
| 21UR-115670 | 0.0    | 0.0  | 0.0    | 0.0   | 0.0   | 0.0  |
| 21UR-115680 | 0.0    | 0.0  | 0.0    | 0.0   | 0.0   | 0.0  |
| 21UR-115690 | 34.0   | 4.0  | 24.0   | 13.0  | 1.0   | 0.0  |
| 21UR-11570  | 0.0    | 0.0  | 1.0    | 0.0   | 6.0   | 0.0  |
| 21UR-115700 | 0.0    | 0.0  | 0.0    | 0.0   | 0.0   | 0.0  |
| 21UR-115710 | 0.0    | 0.0  | 0.0    | 0.0   | 0.0   | 0.0  |
| 21UR-115720 | 0.0    | 1.0  | 0.0    | 0.0   | 0.0   | 0.0  |
| 21UR-115730 | 0.0    | 0.0  | 0.0    | 0.0   | 1.0   | 0.0  |
| 21UR-115740 | 0.0    | 0.0  | 0.0    | 0.0   | 0.0   | 0.0  |
| 21UR-115750 | 0.0    | 0.0  | 0.0    | 0.0   | 1.0   | 0.0  |
| 21UR-115760 | 0.0    | 0.0  | 0.0    | 0.0   | 0.0   | 0.0  |
| 21UR-115770 | 0.0    | 0.0  | 0.0    | 2.0   | 0.0   | 0.0  |
| 21UR-115780 | 0.0    | 0.0  | 0.0    | 0.0   | 0.0   | 0.0  |
| 21UR-115790 | 1.0    | 1.0  | 1.0    | 0.0   | 0.0   | 0.0  |
| 21UR-11580  | 3.0    | 1.0  | 15.0   | 0.0   | 1.0   | 1.0  |
| 21UR-115800 | 0.0    | 0.0  | 0.0    | 0.0   | 0.0   | 0.0  |
| 21UR-115810 | 0.0    | 0.0  | 0.0    | 0.0   | 0.0   | 0.0  |
| 21UR-115820 | 0.0    | 0.0  | 0.0    | 0.0   | 0.0   | 0.0  |
| 21UR-115830 | 4.0    | 11.0 | 5.0    | 4.0   | 11.0  | 5.0  |
| 21UR-115840 | 1.0    | 1.0  | 0.0    | 0.0   | 1.0   | 0.0  |
| 21UR-115850 | 0.0    | 0.0  | 0.0    | 0.0   | 0.0   | 0.0  |
| 21UR-115860 | 0.0    | 0.0  | 0.0    | 0.0   | 0.0   | 1.0  |
| 21UR-115870 | 0.0    | 0.0  | 0.0    | 0.0   | 0.0   | 0.0  |
| 21UR-115880 | 1.0    | 0.5  | 0.0    | 0.0   | 0.0   | 0.0  |
| 21UR-115890 | 0.0    | 0.0  | 0.0    | 0.0   | 0.0   | 0.0  |
| 21UR-11590  | 0.0    | 1.5  | 0.0    | 0.0   | 2.0   | 0.0  |
| 21UR-115900 | 0.0    | 0.0  | 0.0    | 0.0   | 0.0   | 0.0  |
| 21UR-115910 | 0.0    | 1.0  | 0.0    | 0.0   | 0.0   | 0.0  |
| 21UR-115920 | 0.0    | 0.0  | 0.0    | 0.0   | 0.0   | 0.0  |
| 21UR-115930 | 0.0    | 1.0  | 1.0    | 0.0   | 1.0   | 0.0  |
| 21UR-115950 | 0.0    | 0.0  | 0.0    | 0.0   | 1.0   | 0.0  |
| 21UR-115960 | 0.0    | 0.0  | 0.0    | 0.0   | 0.0   | 0.0  |
| 21UR-115970 | 0.0    | 0.0  | 0.0    | 0.0   | 0.0   | 0.0  |
| 21UR-115980 | 0.0    | 0.0  | 0.0    | 0.0   | 0.0   | 0.0  |
| 21UR-115990 | 0.0    | 0.0  | 0.0    | 0.0   | 0.0   | 0.0  |
| 21UR-1160   | 1598.0 | 36.0 | 1032.0 | 436.0 | 70.0  | 22.0 |
| 21UR-11600  | 0.0    | 0.0  | 0.0    | 0.0   | 0.0   | 0.0  |
| 21UR-116000 | 2.0    | 2.0  | 3.0    | 3.0   | 3.0   | 1.0  |
| 21UR-116010 | 13.0   | 2.0  | 8.0    | 4.0   | 4.0   | 0.0  |
| 21UR-116020 | 0.0    | 0.0  | 0.0    | 0.0   | 0.0   | 0.0  |

|             |       |      |       |       |       |     |
|-------------|-------|------|-------|-------|-------|-----|
| 21UR-116030 | 0.0   | 1.0  | 1.0   | 0.0   | 1.0   | 0.0 |
| 21UR-116040 | 0.0   | 0.0  | 0.0   | 0.0   | 0.0   | 0.0 |
| 21UR-116050 | 0.0   | 0.0  | 0.0   | 0.0   | 0.0   | 0.0 |
| 21UR-116060 | 0.0   | 0.0  | 0.0   | 0.0   | 0.0   | 0.0 |
| 21UR-116070 | 0.0   | 0.0  | 3.0   | 0.0   | 0.0   | 0.0 |
| 21UR-116080 | 0.0   | 0.0  | 0.0   | 0.0   | 0.0   | 0.0 |
| 21UR-116090 | 0.0   | 0.0  | 0.0   | 0.0   | 0.0   | 0.0 |
| 21UR-11610  | 0.0   | 5.0  | 1.0   | 0.0   | 4.0   | 0.0 |
| 21UR-116100 | 0.0   | 0.0  | 0.0   | 0.0   | 0.0   | 0.0 |
| 21UR-116110 | 0.0   | 0.0  | 0.0   | 0.0   | 0.0   | 0.0 |
| 21UR-116120 | 0.0   | 4.0  | 0.0   | 0.0   | 1.0   | 0.0 |
| 21UR-116130 | 4.0   | 0.0  | 1.0   | 0.0   | 0.0   | 0.0 |
| 21UR-116140 | 4.0   | 0.0  | 1.0   | 1.0   | 0.0   | 0.0 |
| 21UR-116150 | 2.0   | 5.0  | 0.0   | 0.0   | 4.0   | 0.0 |
| 21UR-116160 | 0.0   | 0.0  | 0.0   | 0.0   | 0.0   | 0.0 |
| 21UR-116170 | 0.0   | 0.0  | 0.0   | 0.0   | 0.0   | 0.0 |
| 21UR-116180 | 0.0   | 0.0  | 0.0   | 0.0   | 0.0   | 0.0 |
| 21UR-116190 | 0.0   | 0.0  | 0.0   | 0.0   | 0.0   | 0.0 |
| 21UR-11620  | 6.0   | 11.0 | 10.0  | 0.0   | 8.0   | 2.0 |
| 21UR-116200 | 0.0   | 0.0  | 0.0   | 0.0   | 0.0   | 0.0 |
| 21UR-116210 | 0.0   | 0.0  | 0.0   | 0.0   | 0.0   | 0.0 |
| 21UR-116220 | 0.0   | 0.0  | 0.0   | 0.0   | 0.0   | 0.0 |
| 21UR-116230 | 38.0  | 13.0 | 45.0  | 4.0   | 1.0   | 0.0 |
| 21UR-116240 | 457.8 | 91.0 | 370.0 | 220.0 | 287.5 | 4.0 |
| 21UR-116250 | 0.0   | 1.0  | 1.0   | 0.0   | 1.0   | 0.0 |
| 21UR-116260 | 0.0   | 0.0  | 0.0   | 0.0   | 0.0   | 0.0 |
| 21UR-116270 | 5.0   | 2.0  | 4.0   | 0.0   | 4.0   | 0.0 |
| 21UR-116280 | 0.0   | 2.0  | 0.0   | 0.0   | 2.0   | 0.0 |
| 21UR-11630  | 0.0   | 1.3  | 1.0   | 0.0   | 0.0   | 0.3 |
| 21UR-116300 | 0.0   | 1.0  | 0.0   | 0.0   | 2.0   | 0.0 |
| 21UR-116310 | 0.0   | 0.1  | 0.0   | 0.0   | 0.0   | 0.0 |
| 21UR-116320 | 0.0   | 0.0  | 0.0   | 0.0   | 0.0   | 0.0 |
| 21UR-116330 | 0.0   | 0.0  | 0.0   | 0.0   | 0.0   | 0.0 |
| 21UR-116340 | 0.0   | 0.0  | 0.0   | 0.0   | 0.0   | 0.0 |
| 21UR-116350 | 0.0   | 0.0  | 0.0   | 0.0   | 0.0   | 0.0 |
| 21UR-116360 | 0.0   | 0.0  | 0.0   | 0.0   | 0.0   | 0.0 |
| 21UR-116370 | 0.0   | 0.0  | 0.0   | 0.0   | 1.0   | 0.0 |
| 21UR-116380 | 0.0   | 0.0  | 0.0   | 0.0   | 0.0   | 0.0 |
| 21UR-116390 | 0.0   | 0.0  | 0.0   | 0.0   | 0.0   | 0.0 |
| 21UR-11640  | 0.0   | 3.0  | 0.0   | 0.0   | 1.0   | 0.0 |
| 21UR-116400 | 1.0   | 0.0  | 0.0   | 0.0   | 0.0   | 0.0 |
| 21UR-116410 | 0.0   | 0.0  | 0.0   | 0.0   | 0.0   | 0.0 |
| 21UR-116420 | 0.0   | 0.0  | 0.0   | 0.0   | 0.0   | 0.0 |
| 21UR-116430 | 0.0   | 0.0  | 1.0   | 0.0   | 0.0   | 0.0 |
| 21UR-116440 | 0.0   | 0.0  | 0.0   | 0.0   | 0.0   | 0.0 |
| 21UR-116450 | 0.0   | 0.0  | 0.0   | 0.0   | 0.0   | 0.0 |
| 21UR-116460 | 0.0   | 0.0  | 0.0   | 0.0   | 0.0   | 0.0 |
| 21UR-116470 | 0.0   | 0.0  | 0.0   | 0.0   | 0.0   | 0.0 |
| 21UR-116480 | 0.0   | 0.0  | 0.0   | 0.0   | 0.0   | 0.0 |
| 21UR-116490 | 0.0   | 0.0  | 0.0   | 0.0   | 0.0   | 0.0 |
| 21UR-11650  | 0.0   | 0.0  | 0.0   | 0.0   | 0.0   | 0.0 |

|             |        |       |        |       |       |      |
|-------------|--------|-------|--------|-------|-------|------|
| 21UR-116500 | 0.0    | 0.0   | 0.0    | 0.0   | 0.0   | 0.0  |
| 21UR-116510 | 0.0    | 1.0   | 0.0    | 0.0   | 0.0   | 0.0  |
| 21UR-116520 | 10.0   | 3.0   | 12.5   | 3.0   | 0.0   | 0.0  |
| 21UR-116530 | 0.0    | 0.0   | 0.0    | 1.0   | 0.0   | 0.0  |
| 21UR-116540 | 2.0    | 1.0   | 2.0    | 0.0   | 1.0   | 0.0  |
| 21UR-116550 | 0.0    | 0.0   | 0.0    | 0.0   | 0.0   | 0.0  |
| 21UR-116560 | 0.0    | 0.0   | 0.0    | 0.0   | 0.0   | 0.0  |
| 21UR-116570 | 2.0    | 0.0   | 1.0    | 0.0   | 0.0   | 0.0  |
| 21UR-116580 | 0.0    | 0.0   | 0.0    | 0.0   | 6.0   | 0.0  |
| 21UR-116590 | 0.0    | 1.0   | 1.0    | 0.0   | 0.0   | 0.0  |
| 21UR-11660  | 1761.6 | 468.3 | 1385.0 | 680.0 | 659.5 | 51.0 |
| 21UR-116600 | 44.0   | 7.0   | 17.0   | 14.0  | 8.0   | 1.0  |
| 21UR-116610 | 0.0    | 0.0   | 0.0    | 0.0   | 0.0   | 0.0  |
| 21UR-116620 | 0.0    | 0.0   | 0.0    | 0.0   | 0.0   | 0.0  |
| 21UR-116630 | 0.0    | 0.0   | 1.0    | 0.0   | 0.0   | 0.0  |
| 21UR-116640 | 0.0    | 0.0   | 0.0    | 0.0   | 0.0   | 0.0  |
| 21UR-116650 | 0.0    | 0.0   | 0.0    | 0.0   | 0.0   | 0.0  |
| 21UR-116660 | 0.0    | 0.0   | 0.0    | 0.0   | 0.0   | 0.0  |
| 21UR-116670 | 22.0   | 10.0  | 26.0   | 7.0   | 6.0   | 1.0  |
| 21UR-116680 | 0.0    | 0.0   | 0.0    | 0.0   | 0.0   | 0.0  |
| 21UR-116690 | 0.0    | 0.0   | 0.0    | 0.0   | 0.0   | 0.0  |
| 21UR-11670  | 166.0  | 12.0  | 175.0  | 42.0  | 17.0  | 7.0  |
| 21UR-116700 | 0.0    | 0.0   | 0.0    | 0.0   | 0.0   | 0.0  |
| 21UR-116710 | 0.0    | 0.0   | 0.0    | 0.0   | 0.0   | 0.0  |
| 21UR-116720 | 0.0    | 0.0   | 0.0    | 0.0   | 0.0   | 0.0  |
| 21UR-116730 | 0.0    | 0.0   | 0.0    | 0.0   | 0.0   | 0.0  |
| 21UR-116740 | 0.0    | 0.0   | 0.0    | 0.0   | 0.0   | 0.0  |
| 21UR-116750 | 0.0    | 0.0   | 0.0    | 0.0   | 0.0   | 0.0  |
| 21UR-116760 | 0.0    | 0.0   | 0.0    | 0.0   | 0.0   | 0.0  |
| 21UR-116770 | 0.0    | 0.0   | 1.0    | 0.0   | 0.0   | 0.0  |
| 21UR-116780 | 0.0    | 0.0   | 0.0    | 0.0   | 0.0   | 0.0  |
| 21UR-116790 | 0.0    | 0.0   | 0.0    | 0.0   | 0.0   | 0.0  |
| 21UR-11680  | 0.0    | 0.0   | 0.0    | 0.0   | 0.0   | 0.0  |
| 21UR-116800 | 2.0    | 18.3  | 7.0    | 3.0   | 47.0  | 6.0  |
| 21UR-116810 | 0.0    | 0.0   | 0.0    | 0.0   | 0.0   | 0.0  |
| 21UR-116820 | 8.0    | 1.0   | 16.0   | 8.0   | 0.0   | 0.0  |
| 21UR-116830 | 0.0    | 1.0   | 0.0    | 0.0   | 7.0   | 1.0  |
| 21UR-116840 | 1.0    | 3.0   | 0.0    | 0.0   | 10.5  | 1.0  |
| 21UR-116850 | 0.0    | 1.0   | 1.0    | 0.0   | 0.0   | 0.0  |
| 21UR-116860 | 0.0    | 0.0   | 0.0    | 0.0   | 0.0   | 0.0  |
| 21UR-116870 | 0.0    | 0.0   | 0.0    | 0.0   | 0.0   | 1.0  |
| 21UR-116880 | 0.0    | 0.0   | 0.0    | 1.0   | 1.0   | 0.0  |
| 21UR-116890 | 0.0    | 3.0   | 2.0    | 0.0   | 4.0   | 0.0  |
| 21UR-11690  | 275.0  | 98.0  | 272.5  | 177.0 | 93.0  | 15.0 |
| 21UR-116900 | 1.0    | 0.0   | 1.0    | 0.0   | 1.0   | 0.0  |
| 21UR-116910 | 0.0    | 4.1   | 0.0    | 1.0   | 0.0   | 0.0  |
| 21UR-116920 | 0.0    | 0.0   | 0.0    | 0.0   | 0.0   | 0.0  |
| 21UR-116930 | 0.0    | 0.0   | 0.0    | 0.0   | 0.0   | 0.0  |
| 21UR-116940 | 0.0    | 0.0   | 0.0    | 0.0   | 0.0   | 0.0  |
| 21UR-116950 | 1.0    | 0.0   | 1.0    | 0.0   | 0.0   | 0.0  |
| 21UR-116960 | 3.0    | 3.0   | 3.0    | 1.0   | 0.0   | 0.0  |



|             |      |      |      |      |      |     |
|-------------|------|------|------|------|------|-----|
| 21UR-116970 | 0.0  | 1.0  | 0.0  | 0.0  | 0.0  | 0.0 |
| 21UR-116980 | 0.0  | 0.0  | 0.0  | 0.0  | 0.0  | 0.0 |
| 21UR-116990 | 0.0  | 0.0  | 0.0  | 0.0  | 0.0  | 0.0 |
| 21UR-1170   | 0.0  | 0.0  | 0.0  | 0.0  | 0.0  | 0.0 |
| 21UR-11700  | 21.0 | 10.0 | 29.0 | 10.0 | 11.0 | 0.0 |
| 21UR-117000 | 0.0  | 0.0  | 0.0  | 0.0  | 0.0  | 0.0 |
| 21UR-117010 | 0.0  | 0.0  | 1.0  | 0.0  | 0.0  | 0.0 |
| 21UR-117020 | 1.0  | 0.0  | 1.0  | 0.0  | 0.0  | 0.0 |
| 21UR-117030 | 0.0  | 4.0  | 3.0  | 1.0  | 1.0  | 1.0 |
| 21UR-117040 | 0.0  | 0.0  | 0.0  | 0.0  | 0.0  | 0.0 |
| 21UR-117050 | 1.0  | 1.0  | 1.0  | 0.0  | 0.0  | 0.0 |
| 21UR-117060 | 0.0  | 0.0  | 0.0  | 0.0  | 0.0  | 0.0 |
| 21UR-117070 | 0.0  | 0.0  | 0.0  | 0.0  | 0.3  | 0.0 |
| 21UR-117080 | 0.0  | 0.0  | 0.0  | 0.0  | 0.0  | 0.0 |
| 21UR-117090 | 0.0  | 0.0  | 0.0  | 0.0  | 0.0  | 0.0 |
| 21UR-11710  | 0.0  | 0.0  | 0.0  | 0.0  | 0.0  | 0.0 |
| 21UR-117100 | 0.0  | 0.0  | 0.0  | 0.0  | 0.0  | 0.0 |
| 21UR-117110 | 0.0  | 1.0  | 0.0  | 0.0  | 2.0  | 0.0 |
| 21UR-117120 | 0.0  | 8.0  | 1.0  | 0.0  | 7.0  | 0.0 |
| 21UR-117130 | 0.0  | 0.0  | 1.0  | 0.0  | 0.0  | 0.0 |
| 21UR-117140 | 0.0  | 0.0  | 0.0  | 0.0  | 0.0  | 0.0 |
| 21UR-117150 | 0.0  | 1.0  | 0.0  | 0.0  | 3.0  | 0.0 |
| 21UR-117160 | 0.0  | 0.0  | 0.0  | 0.0  | 0.0  | 0.0 |
| 21UR-117170 | 0.0  | 0.0  | 0.0  | 0.0  | 0.0  | 0.0 |
| 21UR-117180 | 16.0 | 7.0  | 18.0 | 5.0  | 16.0 | 1.0 |
| 21UR-117190 | 0.0  | 3.0  | 3.0  | 0.0  | 2.0  | 0.0 |
| 21UR-11720  | 4.0  | 2.0  | 1.0  | 6.0  | 0.0  | 0.0 |
| 21UR-117200 | 0.0  | 0.0  | 0.0  | 0.0  | 0.0  | 0.0 |
| 21UR-117210 | 0.0  | 5.0  | 0.0  | 2.0  | 0.0  | 0.0 |
| 21UR-117220 | 0.0  | 0.0  | 0.0  | 0.0  | 0.0  | 0.0 |
| 21UR-117230 | 0.0  | 0.0  | 0.0  | 0.0  | 0.0  | 0.0 |
| 21UR-117240 | 0.0  | 0.0  | 0.0  | 0.0  | 0.0  | 0.0 |
| 21UR-117250 | 0.0  | 0.0  | 0.0  | 0.0  | 0.0  | 0.0 |
| 21UR-117260 | 6.0  | 1.0  | 3.0  | 0.0  | 1.0  | 0.0 |
| 21UR-117270 | 0.0  | 0.0  | 1.0  | 0.0  | 0.0  | 0.0 |
| 21UR-117280 | 0.0  | 0.0  | 0.0  | 0.0  | 0.0  | 0.0 |
| 21UR-117290 | 0.0  | 0.0  | 0.0  | 0.0  | 0.0  | 0.0 |
| 21UR-11730  | 0.0  | 0.0  | 1.0  | 0.0  | 4.0  | 1.0 |
| 21UR-117300 | 0.0  | 0.0  | 0.0  | 0.0  | 0.0  | 0.0 |
| 21UR-117310 | 0.0  | 0.0  | 0.0  | 0.0  | 0.0  | 0.0 |
| 21UR-117320 | 21.0 | 75.0 | 25.0 | 9.0  | 72.0 | 9.0 |
| 21UR-117330 | 0.0  | 0.0  | 1.0  | 0.0  | 0.0  | 0.0 |
| 21UR-117340 | 1.0  | 18.0 | 6.0  | 2.0  | 4.0  | 2.0 |
| 21UR-117350 | 0.0  | 0.0  | 0.0  | 0.0  | 0.0  | 0.0 |
| 21UR-117360 | 0.0  | 0.0  | 0.0  | 0.0  | 0.0  | 0.0 |
| 21UR-117370 | 1.0  | 1.0  | 0.0  | 4.0  | 18.0 | 3.0 |
| 21UR-117380 | 3.0  | 1.0  | 4.0  | 0.0  | 2.0  | 0.0 |
| 21UR-117390 | 0.0  | 0.0  | 0.0  | 0.0  | 0.0  | 0.0 |
| 21UR-117400 | 0.0  | 0.0  | 0.0  | 0.0  | 0.0  | 0.0 |
| 21UR-117410 | 0.0  | 0.0  | 0.0  | 0.0  | 0.0  | 0.0 |
| 21UR-117420 | 0.0  | 0.0  | 0.0  | 0.0  | 0.0  | 0.0 |

|             |      |      |      |      |      |     |
|-------------|------|------|------|------|------|-----|
| 21UR-117430 | 0.0  | 0.0  | 0.0  | 0.0  | 0.0  | 0.0 |
| 21UR-117440 | 0.0  | 0.0  | 0.0  | 0.0  | 0.0  | 0.0 |
| 21UR-117450 | 6.0  | 0.0  | 1.0  | 0.0  | 0.0  | 0.0 |
| 21UR-117460 | 0.0  | 0.0  | 1.0  | 0.0  | 0.0  | 0.0 |
| 21UR-117470 | 0.0  | 0.0  | 0.0  | 0.0  | 0.0  | 0.0 |
| 21UR-117480 | 91.0 | 32.0 | 86.0 | 33.0 | 42.0 | 8.0 |
| 21UR-117490 | 6.0  | 1.0  | 4.0  | 0.0  | 0.0  | 0.0 |
| 21UR-11750  | 0.0  | 0.0  | 1.0  | 0.0  | 0.0  | 1.0 |
| 21UR-117500 | 0.0  | 0.0  | 0.0  | 0.0  | 0.0  | 0.0 |
| 21UR-117510 | 0.0  | 0.0  | 0.0  | 0.0  | 0.0  | 0.0 |
| 21UR-117520 | 0.0  | 0.0  | 0.0  | 0.0  | 1.0  | 0.0 |
| 21UR-117530 | 0.0  | 0.0  | 0.0  | 0.0  | 0.0  | 0.0 |
| 21UR-117540 | 7.0  | 1.0  | 5.0  | 1.0  | 1.0  | 0.0 |
| 21UR-117550 | 2.0  | 1.0  | 1.0  | 2.0  | 0.0  | 0.0 |
| 21UR-117560 | 0.0  | 0.0  | 0.0  | 0.0  | 0.0  | 1.0 |
| 21UR-117570 | 17.0 | 9.0  | 23.0 | 8.0  | 4.0  | 1.0 |
| 21UR-117580 | 1.0  | 0.0  | 3.0  | 0.0  | 2.0  | 0.0 |
| 21UR-117590 | 0.0  | 0.0  | 0.0  | 0.0  | 0.0  | 0.0 |
| 21UR-11760  | 1.0  | 0.0  | 0.0  | 0.0  | 0.0  | 0.0 |
| 21UR-117600 | 1.0  | 6.0  | 0.0  | 0.0  | 3.0  | 1.0 |
| 21UR-117610 | 0.0  | 0.0  | 0.0  | 0.0  | 0.0  | 0.0 |
| 21UR-117620 | 0.0  | 4.0  | 2.0  | 0.0  | 0.0  | 0.0 |
| 21UR-117630 | 6.0  | 3.0  | 6.0  | 1.0  | 14.0 | 0.0 |
| 21UR-117640 | 20.0 | 3.0  | 11.0 | 2.0  | 6.0  | 0.0 |
| 21UR-117650 | 0.0  | 0.0  | 0.0  | 0.0  | 0.0  | 0.0 |
| 21UR-117660 | 5.0  | 4.0  | 3.0  | 2.0  | 6.0  | 1.0 |
| 21UR-117670 | 3.0  | 0.0  | 1.0  | 0.0  | 0.0  | 0.0 |
| 21UR-117680 | 0.0  | 0.0  | 0.0  | 0.0  | 0.0  | 0.0 |
| 21UR-117690 | 0.0  | 0.0  | 0.0  | 0.0  | 0.0  | 0.0 |
| 21UR-11770  | 1.0  | 0.0  | 0.0  | 0.0  | 1.0  | 1.0 |
| 21UR-117700 | 0.0  | 0.0  | 0.0  | 0.0  | 0.0  | 0.0 |
| 21UR-117710 | 0.0  | 0.0  | 0.0  | 0.0  | 0.0  | 0.0 |
| 21UR-117720 | 0.0  | 0.0  | 0.0  | 0.0  | 0.0  | 0.0 |
| 21UR-117730 | 0.0  | 0.0  | 0.0  | 0.0  | 0.0  | 0.0 |
| 21UR-117740 | 0.0  | 0.0  | 0.0  | 0.0  | 0.0  | 0.0 |
| 21UR-117750 | 0.0  | 0.0  | 0.0  | 0.0  | 4.0  | 1.0 |
| 21UR-117760 | 0.0  | 0.0  | 0.0  | 0.0  | 0.0  | 0.0 |
| 21UR-117770 | 0.0  | 0.0  | 0.0  | 0.0  | 0.0  | 0.0 |
| 21UR-117780 | 0.0  | 0.0  | 0.0  | 0.0  | 0.0  | 0.0 |
| 21UR-117790 | 0.0  | 0.0  | 0.0  | 0.0  | 0.0  | 0.0 |
| 21UR-11780  | 0.0  | 0.0  | 0.0  | 1.0  | 0.0  | 0.0 |
| 21UR-117800 | 0.0  | 0.0  | 0.0  | 0.0  | 0.0  | 0.0 |
| 21UR-117810 | 0.0  | 1.0  | 0.0  | 0.0  | 0.0  | 0.0 |
| 21UR-117820 | 0.0  | 0.0  | 1.0  | 0.0  | 0.0  | 0.0 |
| 21UR-117830 | 0.0  | 0.0  | 0.0  | 0.0  | 0.0  | 0.0 |
| 21UR-117840 | 0.0  | 0.0  | 0.0  | 0.0  | 0.0  | 0.0 |
| 21UR-117850 | 0.0  | 0.0  | 0.0  | 0.0  | 0.0  | 0.0 |
| 21UR-117860 | 1.0  | 4.0  | 0.0  | 0.0  | 0.0  | 0.0 |
| 21UR-117870 | 45.0 | 26.0 | 32.0 | 16.0 | 41.0 | 9.0 |
| 21UR-117880 | 0.0  | 0.0  | 0.0  | 0.0  | 0.0  | 0.0 |
| 21UR-117890 | 3.0  | 0.0  | 2.0  | 0.0  | 1.0  | 0.0 |

|             |       |       |       |       |       |      |
|-------------|-------|-------|-------|-------|-------|------|
| 21UR-11790  | 0.0   | 1.0   | 1.0   | 0.0   | 0.0   | 0.0  |
| 21UR-117900 | 1.0   | 14.0  | 3.0   | 0.5   | 6.0   | 4.0  |
| 21UR-117910 | 382.5 | 192.0 | 351.0 | 181.5 | 314.0 | 25.0 |
| 21UR-117920 | 9.0   | 47.0  | 11.0  | 2.0   | 31.0  | 2.0  |
| 21UR-117930 | 12.0  | 43.0  | 24.0  | 8.0   | 43.0  | 6.0  |
| 21UR-117940 | 0.0   | 0.0   | 0.0   | 1.0   | 0.0   | 0.0  |
| 21UR-117950 | 0.0   | 0.1   | 0.0   | 0.0   | 0.0   | 0.0  |
| 21UR-117970 | 0.0   | 0.0   | 0.0   | 0.0   | 0.0   | 0.0  |
| 21UR-117980 | 1.0   | 0.0   | 0.0   | 1.0   | 0.0   | 0.0  |
| 21UR-117990 | 0.0   | 0.0   | 0.0   | 0.0   | 0.0   | 0.0  |
| 21UR-1180   | 18.0  | 14.0  | 6.0   | 4.0   | 10.0  | 0.1  |
| 21UR-11800  | 0.0   | 1.0   | 0.0   | 0.0   | 0.0   | 0.0  |
| 21UR-118000 | 1.0   | 1.0   | 2.0   | 3.0   | 0.0   | 0.0  |
| 21UR-118010 | 0.0   | 0.0   | 0.0   | 0.0   | 0.0   | 0.0  |
| 21UR-118020 | 91.5  | 47.0  | 106.7 | 55.0  | 105.0 | 4.0  |
| 21UR-118030 | 0.0   | 0.0   | 0.0   | 0.0   | 0.0   | 0.0  |
| 21UR-118040 | 0.0   | 0.0   | 0.0   | 0.0   | 0.0   | 0.0  |
| 21UR-118050 | 0.0   | 0.0   | 0.0   | 0.0   | 0.0   | 0.0  |
| 21UR-118060 | 4.0   | 3.0   | 3.0   | 1.0   | 14.2  | 0.0  |
| 21UR-118070 | 0.0   | 0.0   | 0.0   | 0.0   | 0.0   | 0.0  |
| 21UR-118080 | 0.0   | 0.0   | 0.0   | 0.0   | 0.0   | 0.0  |
| 21UR-118090 | 745.0 | 155.0 | 704.0 | 425.0 | 181.0 | 30.0 |
| 21UR-11810  | 3.0   | 5.0   | 4.0   | 1.0   | 20.0  | 1.0  |
| 21UR-118100 | 0.0   | 0.0   | 0.0   | 0.0   | 1.0   | 0.0  |
| 21UR-118110 | 0.0   | 0.0   | 0.0   | 0.0   | 0.0   | 0.0  |
| 21UR-118120 | 0.0   | 0.0   | 0.0   | 0.0   | 0.0   | 0.0  |
| 21UR-118130 | 32.0  | 11.0  | 33.3  | 9.0   | 31.0  | 1.0  |
| 21UR-118140 | 1.0   | 0.0   | 4.0   | 0.0   | 0.0   | 0.0  |
| 21UR-118150 | 1.0   | 0.0   | 0.0   | 0.0   | 0.0   | 0.0  |
| 21UR-118160 | 0.0   | 0.0   | 0.0   | 0.0   | 0.0   | 0.0  |
| 21UR-118170 | 1.0   | 0.0   | 0.0   | 0.0   | 0.0   | 0.0  |
| 21UR-118180 | 0.0   | 0.0   | 0.0   | 0.0   | 0.0   | 0.0  |
| 21UR-118190 | 0.0   | 0.0   | 0.0   | 0.0   | 2.0   | 0.0  |
| 21UR-11820  | 0.0   | 3.0   | 0.0   | 0.0   | 0.0   | 0.0  |
| 21UR-118200 | 1.0   | 2.1   | 0.0   | 1.0   | 1.0   | 0.0  |
| 21UR-118220 | 0.0   | 0.0   | 2.0   | 0.0   | 5.0   | 0.0  |
| 21UR-118230 | 0.0   | 0.0   | 0.0   | 0.0   | 0.0   | 0.0  |
| 21UR-118240 | 0.0   | 0.0   | 0.0   | 0.0   | 0.0   | 0.0  |
| 21UR-118250 | 0.0   | 0.0   | 0.0   | 0.0   | 0.0   | 0.0  |
| 21UR-118260 | 0.0   | 0.0   | 0.0   | 0.0   | 0.0   | 0.0  |
| 21UR-118270 | 0.0   | 0.0   | 0.0   | 0.0   | 0.0   | 0.0  |
| 21UR-118280 | 0.0   | 0.0   | 0.0   | 0.0   | 0.0   | 0.0  |
| 21UR-118290 | 1.0   | 0.0   | 0.0   | 0.0   | 0.0   | 0.0  |
| 21UR-11830  | 0.0   | 0.0   | 0.0   | 0.0   | 1.0   | 1.0  |
| 21UR-118300 | 0.0   | 0.0   | 0.0   | 0.0   | 1.0   | 0.0  |
| 21UR-118310 | 0.0   | 0.0   | 0.0   | 0.0   | 0.0   | 0.0  |
| 21UR-118320 | 0.0   | 0.0   | 0.0   | 0.0   | 0.0   | 0.0  |
| 21UR-118330 | 0.0   | 0.0   | 0.0   | 0.0   | 0.0   | 0.0  |
| 21UR-118340 | 0.0   | 0.0   | 0.0   | 0.0   | 0.0   | 0.0  |
| 21UR-118350 | 0.0   | 1.0   | 0.0   | 0.0   | 0.0   | 0.0  |
| 21UR-118360 | 0.0   | 0.0   | 0.0   | 0.0   | 0.0   | 0.0  |

|             |       |       |       |      |      |      |
|-------------|-------|-------|-------|------|------|------|
| 21UR-118370 | 0.0   | 0.0   | 0.0   | 0.0  | 0.0  | 0.0  |
| 21UR-118380 | 0.0   | 0.0   | 0.0   | 0.0  | 0.0  | 0.0  |
| 21UR-118390 | 0.0   | 1.0   | 0.0   | 0.0  | 0.0  | 0.0  |
| 21UR-11840  | 17.0  | 4.2   | 3.7   | 10.0 | 4.0  | 1.1  |
| 21UR-118400 | 6.0   | 0.0   | 6.0   | 0.0  | 4.0  | 2.0  |
| 21UR-118410 | 0.0   | 0.0   | 0.0   | 0.0  | 0.0  | 0.0  |
| 21UR-118420 | 0.0   | 0.0   | 0.0   | 0.0  | 0.0  | 1.1  |
| 21UR-118430 | 0.0   | 0.0   | 0.0   | 0.0  | 0.0  | 0.0  |
| 21UR-118440 | 0.0   | 1.0   | 0.0   | 0.0  | 6.0  | 0.0  |
| 21UR-118450 | 0.0   | 0.0   | 0.0   | 0.0  | 0.0  | 0.0  |
| 21UR-118460 | 1.0   | 0.0   | 4.0   | 0.0  | 0.0  | 0.0  |
| 21UR-118470 | 1.0   | 11.0  | 1.0   | 0.0  | 9.0  | 1.0  |
| 21UR-118480 | 0.0   | 0.0   | 0.0   | 0.0  | 0.0  | 0.0  |
| 21UR-11850  | 6.0   | 0.0   | 0.0   | 4.0  | 0.0  | 0.0  |
| 21UR-118500 | 4.0   | 2.0   | 3.0   | 0.0  | 8.0  | 0.0  |
| 21UR-118510 | 0.0   | 0.0   | 0.0   | 0.0  | 0.0  | 0.0  |
| 21UR-118520 | 0.0   | 0.0   | 0.0   | 0.0  | 0.0  | 0.0  |
| 21UR-118530 | 0.0   | 0.0   | 0.0   | 0.0  | 0.0  | 0.0  |
| 21UR-118540 | 0.0   | 0.5   | 0.0   | 0.0  | 0.0  | 0.0  |
| 21UR-118550 | 0.0   | 0.0   | 0.0   | 0.0  | 0.0  | 0.0  |
| 21UR-118560 | 0.0   | 0.0   | 0.0   | 0.0  | 0.0  | 0.0  |
| 21UR-118570 | 0.0   | 0.0   | 0.0   | 0.0  | 0.0  | 0.0  |
| 21UR-118580 | 0.0   | 0.0   | 0.0   | 0.0  | 0.0  | 0.0  |
| 21UR-118590 | 0.0   | 0.0   | 0.0   | 0.0  | 0.0  | 0.0  |
| 21UR-11860  | 22.0  | 10.0  | 26.0  | 7.0  | 6.0  | 1.0  |
| 21UR-118600 | 0.0   | 0.0   | 0.0   | 0.0  | 0.0  | 0.0  |
| 21UR-118610 | 0.0   | 0.0   | 0.0   | 0.0  | 0.0  | 1.0  |
| 21UR-118620 | 0.0   | 0.0   | 0.0   | 0.0  | 0.0  | 0.0  |
| 21UR-118630 | 0.0   | 1.0   | 0.0   | 0.0  | 0.0  | 0.0  |
| 21UR-118640 | 0.0   | 0.0   | 0.0   | 0.0  | 0.0  | 0.0  |
| 21UR-118650 | 1.0   | 0.0   | 0.0   | 0.0  | 0.0  | 0.0  |
| 21UR-118660 | 0.0   | 0.0   | 0.0   | 0.0  | 0.0  | 0.0  |
| 21UR-118680 | 0.0   | 0.0   | 0.0   | 0.0  | 0.0  | 0.0  |
| 21UR-118690 | 0.0   | 0.0   | 0.0   | 0.0  | 0.0  | 0.0  |
| 21UR-11870  | 0.0   | 0.0   | 0.0   | 0.0  | 0.0  | 0.0  |
| 21UR-118700 | 0.0   | 0.0   | 0.0   | 0.0  | 0.0  | 0.0  |
| 21UR-118710 | 0.0   | 0.0   | 1.0   | 0.0  | 1.0  | 0.0  |
| 21UR-118720 | 0.0   | 0.0   | 0.0   | 0.0  | 0.0  | 0.0  |
| 21UR-118730 | 0.0   | 0.0   | 0.0   | 0.0  | 0.0  | 0.0  |
| 21UR-118740 | 0.0   | 0.0   | 0.0   | 0.0  | 0.0  | 0.0  |
| 21UR-118750 | 131.0 | 229.0 | 177.0 | 46.0 | 38.5 | 26.0 |
| 21UR-118760 | 0.0   | 0.0   | 0.0   | 0.0  | 0.0  | 0.0  |
| 21UR-118770 | 0.0   | 0.0   | 0.0   | 0.0  | 0.0  | 0.0  |
| 21UR-118780 | 0.0   | 0.0   | 0.0   | 0.0  | 0.0  | 0.0  |
| 21UR-118790 | 0.0   | 0.0   | 0.0   | 0.0  | 0.0  | 0.0  |
| 21UR-11880  | 1.0   | 5.0   | 4.0   | 0.0  | 5.0  | 1.0  |
| 21UR-118800 | 0.0   | 2.0   | 11.0  | 0.0  | 1.0  | 0.0  |
| 21UR-118810 | 0.0   | 0.0   | 0.0   | 0.0  | 0.0  | 0.0  |
| 21UR-118820 | 0.0   | 0.0   | 0.0   | 0.0  | 0.0  | 0.0  |
| 21UR-118830 | 4.0   | 3.0   | 7.0   | 3.0  | 0.0  | 0.0  |
| 21UR-118840 | 4.0   | 1.0   | 6.0   | 3.0  | 6.0  | 0.0  |

|             |       |      |       |      |      |     |
|-------------|-------|------|-------|------|------|-----|
| 21UR-118850 | 2.0   | 2.0  | 4.0   | 1.0  | 4.0  | 1.0 |
| 21UR-118860 | 0.0   | 0.0  | 0.0   | 0.0  | 0.0  | 0.0 |
| 21UR-118870 | 0.0   | 0.0  | 0.0   | 0.0  | 0.0  | 0.0 |
| 21UR-118880 | 0.0   | 1.0  | 0.0   | 0.0  | 0.0  | 0.0 |
| 21UR-118890 | 18.0  | 10.0 | 6.0   | 10.0 | 9.0  | 1.0 |
| 21UR-11890  | 6.0   | 51.0 | 4.0   | 0.0  | 64.0 | 1.0 |
| 21UR-118900 | 0.0   | 0.0  | 0.0   | 0.0  | 0.0  | 0.0 |
| 21UR-118910 | 0.0   | 0.0  | 0.0   | 0.0  | 0.0  | 0.0 |
| 21UR-118920 | 0.0   | 0.0  | 0.0   | 0.0  | 0.0  | 0.0 |
| 21UR-118930 | 0.0   | 0.0  | 0.0   | 0.0  | 0.0  | 0.0 |
| 21UR-118940 | 0.0   | 0.0  | 0.0   | 0.0  | 0.0  | 0.0 |
| 21UR-118950 | 3.0   | 4.0  | 0.0   | 1.0  | 1.0  | 0.0 |
| 21UR-118960 | 0.0   | 0.0  | 0.0   | 0.0  | 0.0  | 0.0 |
| 21UR-118970 | 0.0   | 0.0  | 0.0   | 0.0  | 0.0  | 0.0 |
| 21UR-118980 | 0.0   | 0.0  | 1.0   | 17.0 | 38.3 | 4.0 |
| 21UR-118990 | 2.0   | 0.0  | 2.0   | 0.0  | 0.0  | 0.0 |
| 21UR-1190   | 147.0 | 35.0 | 133.0 | 65.0 | 28.0 | 3.0 |
| 21UR-11900  | 11.0  | 8.0  | 8.0   | 0.0  | 10.0 | 0.0 |
| 21UR-119000 | 0.0   | 0.0  | 0.0   | 0.0  | 0.0  | 0.0 |
| 21UR-119010 | 13.0  | 56.0 | 19.0  | 3.0  | 29.5 | 1.0 |
| 21UR-119020 | 0.0   | 0.0  | 0.0   | 0.0  | 0.0  | 0.0 |
| 21UR-119030 | 0.0   | 0.0  | 0.0   | 0.0  | 0.0  | 0.0 |
| 21UR-119040 | 0.0   | 0.0  | 0.0   | 0.0  | 0.0  | 0.0 |
| 21UR-119050 | 0.0   | 0.0  | 0.0   | 0.0  | 0.0  | 0.0 |
| 21UR-119060 | 0.0   | 0.0  | 0.0   | 0.0  | 0.0  | 0.0 |
| 21UR-119070 | 0.0   | 0.0  | 0.0   | 0.0  | 0.0  | 0.0 |
| 21UR-119080 | 0.0   | 0.0  | 0.0   | 0.0  | 0.0  | 0.0 |
| 21UR-119090 | 0.0   | 0.5  | 0.0   | 0.0  | 0.0  | 0.0 |
| 21UR-11910  | 0.0   | 0.0  | 0.0   | 0.0  | 0.0  | 0.0 |
| 21UR-119100 | 0.0   | 0.0  | 0.0   | 0.0  | 0.0  | 0.0 |
| 21UR-119110 | 0.0   | 0.0  | 0.0   | 0.0  | 0.0  | 0.0 |
| 21UR-119120 | 0.0   | 0.0  | 0.0   | 0.0  | 0.0  | 0.0 |
| 21UR-119130 | 0.0   | 0.0  | 0.0   | 0.0  | 0.0  | 0.0 |
| 21UR-119140 | 43.0  | 24.0 | 53.0  | 17.0 | 21.0 | 1.0 |
| 21UR-119150 | 4.0   | 4.0  | 2.0   | 0.0  | 6.0  | 0.0 |
| 21UR-119160 | 0.0   | 0.0  | 0.0   | 0.0  | 0.0  | 0.0 |
| 21UR-119170 | 0.0   | 0.0  | 0.0   | 0.0  | 0.0  | 0.0 |
| 21UR-119180 | 0.0   | 0.0  | 0.0   | 0.0  | 0.0  | 0.0 |
| 21UR-119190 | 1.0   | 0.0  | 0.0   | 0.0  | 2.0  | 0.0 |
| 21UR-11920  | 0.0   | 0.0  | 0.0   | 0.0  | 0.0  | 0.0 |
| 21UR-119200 | 1.0   | 0.0  | 1.0   | 0.0  | 2.0  | 0.0 |
| 21UR-119210 | 0.0   | 0.0  | 0.0   | 0.0  | 0.0  | 0.0 |
| 21UR-119220 | 0.0   | 0.0  | 0.0   | 0.0  | 0.0  | 0.0 |
| 21UR-119230 | 0.0   | 0.1  | 0.0   | 0.0  | 0.0  | 0.0 |
| 21UR-119240 | 1.0   | 0.0  | 0.0   | 0.0  | 0.0  | 0.0 |
| 21UR-119250 | 0.0   | 1.0  | 0.0   | 0.0  | 0.0  | 0.0 |
| 21UR-119260 | 3.0   | 4.0  | 2.0   | 0.0  | 1.0  | 0.0 |
| 21UR-119270 | 0.0   | 0.0  | 0.0   | 0.0  | 0.0  | 0.0 |
| 21UR-119280 | 0.0   | 0.0  | 0.0   | 0.0  | 0.0  | 0.0 |
| 21UR-119290 | 3.0   | 0.0  | 1.0   | 1.0  | 1.0  | 0.0 |
| 21UR-11930  | 79.0  | 53.5 | 121.0 | 56.0 | 73.0 | 6.0 |

|             |       |      |       |       |       |     |
|-------------|-------|------|-------|-------|-------|-----|
| 21UR-119300 | 0.0   | 0.0  | 0.0   | 0.0   | 0.0   | 0.0 |
| 21UR-119310 | 0.0   | 0.0  | 0.0   | 0.0   | 0.0   | 0.0 |
| 21UR-119320 | 0.0   | 0.0  | 1.0   | 0.0   | 0.0   | 0.0 |
| 21UR-119330 | 0.0   | 0.2  | 0.0   | 0.0   | 0.0   | 0.0 |
| 21UR-119340 | 0.0   | 0.0  | 0.0   | 0.0   | 0.0   | 0.0 |
| 21UR-119350 | 0.0   | 1.0  | 0.0   | 0.0   | 0.0   | 0.0 |
| 21UR-119360 | 1.0   | 5.0  | 0.0   | 0.0   | 0.0   | 2.0 |
| 21UR-119370 | 2.0   | 17.0 | 7.0   | 3.0   | 45.0  | 6.0 |
| 21UR-119380 | 0.0   | 1.0  | 0.0   | 0.0   | 0.0   | 0.0 |
| 21UR-119390 | 1.0   | 0.0  | 0.0   | 0.0   | 0.0   | 0.0 |
| 21UR-11940  | 8.0   | 0.0  | 1.0   | 0.0   | 1.0   | 0.0 |
| 21UR-119400 | 0.0   | 0.6  | 3.3   | 0.0   | 1.0   | 0.0 |
| 21UR-119410 | 0.0   | 0.0  | 0.0   | 0.0   | 0.0   | 0.0 |
| 21UR-119420 | 0.0   | 0.0  | 0.0   | 0.0   | 0.0   | 0.0 |
| 21UR-119430 | 1.0   | 0.0  | 0.0   | 0.0   | 0.0   | 0.0 |
| 21UR-119440 | 0.0   | 0.0  | 0.0   | 0.0   | 0.0   | 1.0 |
| 21UR-119450 | 2.0   | 0.0  | 3.0   | 0.0   | 2.0   | 0.0 |
| 21UR-119460 | 8.0   | 5.0  | 25.0  | 1.0   | 3.0   | 0.0 |
| 21UR-119470 | 0.0   | 0.0  | 0.0   | 0.0   | 0.0   | 0.0 |
| 21UR-119480 | 4.0   | 1.2  | 3.0   | 1.0   | 1.0   | 0.0 |
| 21UR-119490 | 0.0   | 0.0  | 0.0   | 0.0   | 0.0   | 0.0 |
| 21UR-11950  | 4.0   | 4.0  | 0.0   | 0.0   | 0.0   | 0.0 |
| 21UR-119500 | 0.0   | 0.0  | 0.0   | 0.0   | 0.0   | 0.0 |
| 21UR-119510 | 0.0   | 0.0  | 0.0   | 0.0   | 0.0   | 0.0 |
| 21UR-119520 | 4.0   | 3.0  | 2.0   | 0.0   | 3.0   | 0.0 |
| 21UR-119530 | 0.0   | 0.0  | 0.0   | 0.0   | 0.0   | 0.0 |
| 21UR-119540 | 0.0   | 0.0  | 0.0   | 0.0   | 0.0   | 0.0 |
| 21UR-119550 | 0.0   | 0.0  | 0.0   | 0.0   | 0.0   | 0.0 |
| 21UR-119560 | 0.0   | 0.0  | 0.0   | 0.0   | 0.0   | 0.0 |
| 21UR-119570 | 0.0   | 0.0  | 0.0   | 0.0   | 0.0   | 1.0 |
| 21UR-119580 | 0.0   | 0.0  | 0.0   | 0.0   | 0.0   | 0.0 |
| 21UR-119590 | 0.0   | 0.0  | 0.0   | 1.0   | 0.0   | 0.0 |
| 21UR-11960  | 0.0   | 0.0  | 0.0   | 0.0   | 0.0   | 0.0 |
| 21UR-119600 | 1.0   | 0.0  | 2.0   | 0.0   | 1.0   | 1.1 |
| 21UR-119610 | 0.0   | 0.0  | 0.0   | 0.0   | 0.0   | 0.0 |
| 21UR-119620 | 0.0   | 0.0  | 0.0   | 0.0   | 0.0   | 0.0 |
| 21UR-119630 | 0.0   | 0.0  | 0.0   | 0.0   | 0.0   | 0.0 |
| 21UR-119640 | 851.0 | 53.3 | 769.0 | 874.0 | 200.0 | 8.0 |
| 21UR-119650 | 2.0   | 0.0  | 2.0   | 0.0   | 0.0   | 0.0 |
| 21UR-119660 | 2.0   | 5.0  | 5.0   | 2.0   | 5.0   | 0.0 |
| 21UR-119670 | 0.0   | 0.0  | 0.0   | 0.0   | 0.0   | 0.0 |
| 21UR-119680 | 0.0   | 0.0  | 0.0   | 0.0   | 0.0   | 0.0 |
| 21UR-119690 | 0.0   | 0.0  | 0.0   | 0.0   | 0.0   | 0.0 |
| 21UR-11970  | 16.0  | 1.0  | 18.0  | 8.0   | 12.0  | 0.0 |
| 21UR-119700 | 0.0   | 0.0  | 0.0   | 0.0   | 0.0   | 0.0 |
| 21UR-119710 | 0.0   | 0.0  | 0.0   | 0.0   | 0.0   | 0.0 |
| 21UR-119720 | 0.0   | 0.0  | 0.0   | 0.0   | 0.0   | 0.0 |
| 21UR-119730 | 0.0   | 0.0  | 0.0   | 0.0   | 0.0   | 0.0 |
| 21UR-119740 | 0.0   | 2.8  | 0.0   | 0.0   | 0.0   | 0.3 |
| 21UR-119750 | 0.0   | 0.0  | 0.0   | 0.0   | 0.0   | 0.0 |
| 21UR-119760 | 22.0  | 10.0 | 26.0  | 5.0   | 48.0  | 1.0 |

|             |        |       |        |        |       |      |
|-------------|--------|-------|--------|--------|-------|------|
| 21UR-119770 | 0.0    | 0.0   | 0.0    | 0.0    | 0.0   | 0.0  |
| 21UR-119780 | 0.0    | 0.0   | 0.0    | 0.0    | 0.0   | 0.0  |
| 21UR-119790 | 0.0    | 0.0   | 0.0    | 0.0    | 0.0   | 0.0  |
| 21UR-11980  | 0.0    | 0.0   | 0.0    | 0.0    | 0.0   | 0.0  |
| 21UR-119800 | 3.0    | 0.0   | 0.0    | 0.0    | 0.0   | 0.0  |
| 21UR-119810 | 1.0    | 0.0   | 0.0    | 0.0    | 0.0   | 0.0  |
| 21UR-119820 | 0.0    | 0.0   | 0.0    | 0.0    | 2.0   | 0.0  |
| 21UR-119830 | 0.0    | 0.0   | 0.0    | 0.0    | 0.0   | 0.0  |
| 21UR-119840 | 0.0    | 0.0   | 0.0    | 0.0    | 0.0   | 0.0  |
| 21UR-119850 | 0.0    | 2.0   | 1.0    | 1.0    | 3.0   | 0.0  |
| 21UR-119860 | 5.0    | 0.0   | 2.0    | 0.0    | 0.0   | 0.0  |
| 21UR-119870 | 95.0   | 15.0  | 85.0   | 52.0   | 16.0  | 2.0  |
| 21UR-119880 | 0.0    | 0.0   | 0.0    | 0.0    | 0.0   | 0.0  |
| 21UR-119890 | 11.0   | 11.0  | 6.0    | 2.0    | 17.0  | 2.0  |
| 21UR-11990  | 0.0    | 0.0   | 0.0    | 1.0    | 0.0   | 0.0  |
| 21UR-119900 | 0.0    | 0.0   | 0.0    | 0.0    | 0.0   | 0.0  |
| 21UR-119910 | 1.0    | 4.0   | 1.0    | 0.0    | 2.0   | 2.0  |
| 21UR-119920 | 4.0    | 5.0   | 7.0    | 6.0    | 2.0   | 0.0  |
| 21UR-119930 | 0.0    | 0.0   | 0.0    | 0.0    | 0.0   | 0.0  |
| 21UR-119940 | 9.0    | 7.0   | 7.0    | 1.0    | 8.0   | 1.0  |
| 21UR-119950 | 0.0    | 0.0   | 1.0    | 0.0    | 0.0   | 0.0  |
| 21UR-119960 | 0.0    | 0.0   | 0.0    | 0.0    | 0.0   | 0.0  |
| 21UR-119970 | 0.0    | 0.0   | 0.0    | 0.0    | 0.0   | 0.0  |
| 21UR-119980 | 25.0   | 1.0   | 24.0   | 12.0   | 4.0   | 1.0  |
| 21UR-119990 | 54.0   | 9.0   | 59.0   | 31.0   | 32.0  | 0.0  |
| 21UR-120    | 0.0    | 0.0   | 0.0    | 1.0    | 0.0   | 0.0  |
| 21UR-1200   | 129.0  | 33.0  | 132.7  | 36.0   | 39.0  | 6.0  |
| 21UR-12000  | 5503.0 | 637.0 | 5194.8 | 2261.0 | 332.0 | 42.0 |
| 21UR-120000 | 0.0    | 0.0   | 0.0    | 0.0    | 0.0   | 0.0  |
| 21UR-120010 | 0.0    | 0.0   | 0.0    | 0.0    | 0.0   | 0.0  |
| 21UR-120020 | 7.0    | 4.0   | 6.0    | 0.0    | 20.0  | 0.0  |
| 21UR-120030 | 0.0    | 7.0   | 0.0    | 0.0    | 1.0   | 0.1  |
| 21UR-120040 | 0.0    | 0.0   | 0.0    | 0.0    | 0.0   | 0.0  |
| 21UR-120050 | 0.0    | 0.0   | 0.0    | 0.0    | 0.0   | 0.0  |
| 21UR-120060 | 0.0    | 0.0   | 0.0    | 0.0    | 0.0   | 0.0  |
| 21UR-120070 | 0.0    | 0.0   | 0.0    | 0.0    | 0.0   | 1.0  |
| 21UR-120080 | 0.0    | 0.0   | 0.0    | 0.0    | 0.0   | 1.0  |
| 21UR-120090 | 0.0    | 1.0   | 0.0    | 0.0    | 7.0   | 1.0  |
| 21UR-12010  | 62.0   | 3.0   | 46.0   | 25.0   | 6.0   | 1.0  |
| 21UR-120100 | 0.0    | 1.0   | 0.0    | 0.0    | 0.0   | 0.0  |
| 21UR-120110 | 0.0    | 1.0   | 0.0    | 0.0    | 0.0   | 0.0  |
| 21UR-120120 | 1.0    | 0.0   | 0.0    | 0.0    | 0.0   | 0.0  |
| 21UR-120130 | 0.0    | 0.0   | 0.0    | 0.0    | 0.0   | 0.0  |
| 21UR-120140 | 5.0    | 5.0   | 9.0    | 1.0    | 8.0   | 0.0  |
| 21UR-120150 | 5.0    | 1.0   | 11.0   | 5.0    | 0.0   | 0.0  |
| 21UR-120160 | 9.0    | 1.0   | 2.0    | 1.0    | 0.0   | 0.0  |
| 21UR-120170 | 0.0    | 0.0   | 0.0    | 0.0    | 0.0   | 0.0  |
| 21UR-120180 | 0.0    | 0.0   | 0.0    | 0.0    | 0.0   | 0.0  |
| 21UR-120190 | 0.0    | 13.0  | 0.0    | 0.0    | 0.0   | 0.0  |
| 21UR-12020  | 0.0    | 1.0   | 0.0    | 0.0    | 3.0   | 0.0  |
| 21UR-120200 | 0.0    | 0.0   | 0.0    | 0.0    | 0.0   | 0.0  |

|             |       |       |       |       |       |      |
|-------------|-------|-------|-------|-------|-------|------|
| 21UR-120210 | 0.0   | 0.0   | 0.0   | 0.0   | 0.0   | 0.0  |
| 21UR-120220 | 5.0   | 4.0   | 2.0   | 0.0   | 11.4  | 2.0  |
| 21UR-120230 | 1.0   | 0.0   | 1.0   | 0.0   | 0.0   | 0.0  |
| 21UR-120240 | 158.0 | 56.0  | 154.0 | 62.0  | 96.0  | 9.0  |
| 21UR-120250 | 0.0   | 0.0   | 0.0   | 0.0   | 0.0   | 0.0  |
| 21UR-120260 | 0.0   | 0.0   | 0.0   | 0.0   | 0.0   | 0.0  |
| 21UR-120270 | 0.0   | 0.0   | 0.0   | 0.0   | 0.0   | 0.0  |
| 21UR-120280 | 0.0   | 0.0   | 0.0   | 0.0   | 0.0   | 0.0  |
| 21UR-120290 | 0.0   | 0.4   | 0.0   | 0.0   | 0.0   | 0.0  |
| 21UR-12030  | 13.0  | 0.0   | 8.0   | 1.0   | 29.0  | 0.0  |
| 21UR-120300 | 0.0   | 0.0   | 0.0   | 0.0   | 0.0   | 0.0  |
| 21UR-120310 | 0.0   | 0.0   | 0.0   | 0.0   | 0.0   | 0.0  |
| 21UR-120320 | 1.0   | 0.0   | 0.0   | 0.0   | 0.0   | 0.0  |
| 21UR-120330 | 0.0   | 0.0   | 0.0   | 0.0   | 0.0   | 0.0  |
| 21UR-120340 | 0.0   | 0.0   | 0.0   | 0.0   | 0.0   | 0.0  |
| 21UR-120350 | 0.0   | 0.0   | 0.0   | 0.0   | 0.0   | 0.0  |
| 21UR-120360 | 6.0   | 3.0   | 3.0   | 0.0   | 4.0   | 2.0  |
| 21UR-120370 | 2.0   | 0.0   | 0.0   | 0.0   | 1.0   | 0.0  |
| 21UR-120380 | 0.0   | 0.0   | 0.0   | 0.0   | 0.0   | 0.0  |
| 21UR-120390 | 0.0   | 0.0   | 0.0   | 0.0   | 0.0   | 0.0  |
| 21UR-12040  | 1.0   | 1.0   | 0.0   | 0.0   | 1.0   | 0.0  |
| 21UR-120400 | 0.0   | 0.0   | 0.0   | 0.0   | 0.0   | 0.0  |
| 21UR-120410 | 0.0   | 1.5   | 0.0   | 0.0   | 1.0   | 0.0  |
| 21UR-120420 | 0.0   | 0.0   | 0.0   | 0.0   | 0.0   | 0.0  |
| 21UR-120430 | 0.0   | 0.0   | 0.0   | 0.0   | 0.0   | 0.0  |
| 21UR-120440 | 0.0   | 0.0   | 0.0   | 0.0   | 0.0   | 0.0  |
| 21UR-120450 | 0.0   | 0.0   | 1.0   | 1.0   | 0.0   | 1.0  |
| 21UR-120460 | 0.0   | 0.0   | 0.0   | 0.0   | 0.0   | 0.0  |
| 21UR-120470 | 0.0   | 0.0   | 0.0   | 0.0   | 0.0   | 0.0  |
| 21UR-120480 | 42.0  | 5.0   | 36.0  | 10.0  | 4.0   | 4.0  |
| 21UR-120490 | 0.0   | 0.0   | 0.0   | 0.0   | 0.0   | 0.0  |
| 21UR-12050  | 56.0  | 30.0  | 59.0  | 15.0  | 74.0  | 3.0  |
| 21UR-120500 | 6.0   | 9.0   | 4.0   | 2.0   | 6.0   | 3.0  |
| 21UR-120510 | 4.0   | 1.0   | 2.0   | 0.0   | 2.0   | 1.0  |
| 21UR-120520 | 79.0  | 27.2  | 56.0  | 31.0  | 9.0   | 3.0  |
| 21UR-120530 | 0.0   | 0.0   | 0.0   | 0.0   | 0.0   | 0.0  |
| 21UR-120540 | 696.5 | 242.0 | 602.7 | 211.5 | 254.0 | 15.0 |
| 21UR-120550 | 9.0   | 9.3   | 6.0   | 2.0   | 3.0   | 0.0  |
| 21UR-120560 | 0.0   | 0.0   | 0.0   | 0.0   | 0.0   | 0.0  |
| 21UR-120570 | 8.0   | 5.0   | 5.0   | 2.0   | 2.0   | 0.0  |
| 21UR-120580 | 0.0   | 0.0   | 0.0   | 0.0   | 0.0   | 0.0  |
| 21UR-120590 | 0.0   | 1.0   | 0.0   | 0.0   | 0.0   | 1.0  |
| 21UR-12060  | 8.0   | 0.0   | 6.0   | 0.0   | 0.0   | 0.0  |
| 21UR-120600 | 0.0   | 0.0   | 2.0   | 0.0   | 0.0   | 0.0  |
| 21UR-120610 | 1.0   | 1.0   | 0.0   | 0.0   | 1.0   | 1.0  |
| 21UR-120620 | 0.0   | 0.0   | 0.0   | 0.0   | 0.0   | 0.0  |
| 21UR-120630 | 5.0   | 16.0  | 7.0   | 0.0   | 46.0  | 0.0  |
| 21UR-120640 | 0.0   | 0.0   | 0.0   | 0.0   | 0.0   | 0.0  |
| 21UR-120650 | 2.0   | 2.0   | 5.0   | 0.0   | 4.0   | 1.0  |
| 21UR-120660 | 0.0   | 0.0   | 0.0   | 0.0   | 0.0   | 0.0  |
| 21UR-120670 | 0.0   | 0.0   | 0.0   | 0.0   | 0.0   | 0.0  |



|             |      |      |      |      |      |      |
|-------------|------|------|------|------|------|------|
| 21UR-120680 | 8.0  | 12.0 | 8.0  | 4.0  | 18.0 | 1.0  |
| 21UR-120690 | 0.0  | 1.0  | 0.0  | 0.0  | 0.0  | 0.0  |
| 21UR-12070  | 1.0  | 1.0  | 1.0  | 1.0  | 1.0  | 0.0  |
| 21UR-120700 | 0.0  | 3.0  | 0.0  | 0.0  | 1.0  | 2.0  |
| 21UR-120710 | 0.0  | 0.0  | 0.0  | 0.0  | 0.0  | 0.0  |
| 21UR-120720 | 0.0  | 0.0  | 0.0  | 0.0  | 0.0  | 0.0  |
| 21UR-120730 | 3.0  | 6.0  | 6.0  | 0.0  | 0.0  | 1.0  |
| 21UR-120740 | 0.0  | 0.0  | 0.0  | 0.0  | 0.0  | 0.0  |
| 21UR-120750 | 0.0  | 0.0  | 0.0  | 0.0  | 0.0  | 0.0  |
| 21UR-120760 | 0.0  | 0.0  | 0.0  | 0.0  | 0.0  | 0.0  |
| 21UR-120770 | 8.0  | 0.0  | 6.0  | 2.0  | 1.0  | 0.0  |
| 21UR-120780 | 2.0  | 1.0  | 3.0  | 1.0  | 3.0  | 0.0  |
| 21UR-120790 | 0.0  | 0.0  | 1.0  | 0.0  | 0.0  | 0.0  |
| 21UR-12080  | 0.0  | 2.0  | 0.0  | 0.0  | 2.0  | 0.0  |
| 21UR-120800 | 0.0  | 1.0  | 0.0  | 0.0  | 0.0  | 0.0  |
| 21UR-120810 | 0.0  | 0.0  | 0.0  | 0.0  | 0.0  | 0.0  |
| 21UR-120820 | 84.5 | 80.0 | 59.0 | 37.0 | 43.0 | 6.0  |
| 21UR-120830 | 0.0  | 0.0  | 0.0  | 0.0  | 0.0  | 0.0  |
| 21UR-120840 | 0.0  | 0.0  | 0.0  | 0.0  | 0.0  | 0.0  |
| 21UR-120850 | 0.0  | 0.0  | 0.0  | 0.0  | 0.0  | 1.0  |
| 21UR-120860 | 1.0  | 1.0  | 1.0  | 0.0  | 0.0  | 0.0  |
| 21UR-120870 | 1.0  | 0.0  | 1.0  | 0.0  | 0.0  | 0.0  |
| 21UR-120880 | 1.0  | 2.0  | 4.0  | 0.0  | 1.0  | 0.0  |
| 21UR-120890 | 0.0  | 1.0  | 2.0  | 0.0  | 2.0  | 0.0  |
| 21UR-12090  | 1.0  | 3.0  | 2.0  | 1.0  | 3.0  | 0.0  |
| 21UR-120900 | 2.0  | 0.0  | 1.0  | 1.0  | 0.0  | 0.0  |
| 21UR-120910 | 0.0  | 1.0  | 0.0  | 0.0  | 1.0  | 1.0  |
| 21UR-120920 | 1.0  | 2.0  | 0.0  | 0.0  | 0.0  | 0.0  |
| 21UR-120930 | 0.0  | 1.0  | 0.0  | 0.0  | 0.0  | 0.0  |
| 21UR-120940 | 0.0  | 0.0  | 0.0  | 0.0  | 0.0  | 0.0  |
| 21UR-120950 | 0.0  | 8.0  | 0.0  | 0.0  | 4.0  | 4.0  |
| 21UR-120960 | 14.0 | 24.0 | 14.0 | 3.0  | 9.0  | 2.0  |
| 21UR-120970 | 0.0  | 2.0  | 1.0  | 0.0  | 1.0  | 0.0  |
| 21UR-120980 | 0.0  | 0.0  | 0.0  | 0.0  | 0.0  | 0.0  |
| 21UR-120990 | 1.0  | 1.0  | 1.0  | 0.0  | 6.0  | 0.0  |
| 21UR-1210   | 36.5 | 35.0 | 79.7 | 22.0 | 28.0 | 10.0 |
| 21UR-12100  | 0.0  | 0.0  | 0.0  | 0.0  | 0.0  | 0.0  |
| 21UR-121000 | 0.0  | 0.0  | 1.0  | 1.0  | 1.0  | 0.0  |
| 21UR-121010 | 0.0  | 0.0  | 0.0  | 0.0  | 0.0  | 0.0  |
| 21UR-121020 | 0.0  | 0.0  | 0.0  | 0.0  | 0.0  | 0.0  |
| 21UR-121030 | 0.0  | 0.0  | 0.0  | 0.0  | 0.0  | 0.0  |
| 21UR-121040 | 0.0  | 0.0  | 0.0  | 0.0  | 0.0  | 0.0  |
| 21UR-121050 | 0.0  | 0.0  | 0.0  | 0.0  | 0.0  | 0.0  |
| 21UR-121060 | 0.0  | 0.0  | 0.0  | 0.0  | 0.0  | 0.0  |
| 21UR-121070 | 0.0  | 1.0  | 0.0  | 0.0  | 0.0  | 0.0  |
| 21UR-121080 | 0.0  | 0.0  | 0.0  | 0.0  | 0.1  | 0.0  |
| 21UR-121090 | 0.0  | 0.0  | 0.0  | 0.0  | 1.0  | 1.0  |
| 21UR-12110  | 1.0  | 1.0  | 1.0  | 4.0  | 6.0  | 0.0  |
| 21UR-121100 | 0.0  | 0.0  | 0.0  | 0.0  | 0.0  | 0.0  |
| 21UR-121110 | 0.0  | 0.0  | 0.0  | 0.0  | 0.0  | 0.0  |
| 21UR-121120 | 0.0  | 0.0  | 0.0  | 0.0  | 0.0  | 0.0  |

|             |        |       |        |        |       |      |
|-------------|--------|-------|--------|--------|-------|------|
| 21UR-121130 | 2392.0 | 128.0 | 1883.0 | 1002.0 | 200.0 | 24.1 |
| 21UR-121140 | 118.0  | 10.0  | 109.0  | 55.0   | 17.0  | 1.0  |
| 21UR-121150 | 81.0   | 29.0  | 83.3   | 29.0   | 29.0  | 4.0  |
| 21UR-121160 | 0.0    | 0.0   | 0.0    | 0.0    | 0.0   | 0.0  |
| 21UR-121170 | 1.0    | 7.0   | 2.0    | 2.0    | 0.0   | 1.0  |
| 21UR-121180 | 0.0    | 4.0   | 0.0    | 0.0    | 0.0   | 0.0  |
| 21UR-121190 | 3.0    | 2.0   | 4.0    | 3.0    | 4.0   | 0.0  |
| 21UR-12120  | 0.0    | 0.0   | 0.0    | 0.0    | 0.0   | 0.0  |
| 21UR-121200 | 0.3    | 0.0   | 0.0    | 1.0    | 1.0   | 1.0  |
| 21UR-121210 | 0.0    | 0.0   | 0.0    | 1.0    | 0.0   | 0.0  |
| 21UR-121220 | 110.0  | 10.0  | 104.0  | 53.0   | 15.0  | 1.0  |
| 21UR-121230 | 0.0    | 0.0   | 0.0    | 0.0    | 2.0   | 0.0  |
| 21UR-121240 | 14.0   | 5.0   | 32.0   | 12.0   | 27.0  | 1.0  |
| 21UR-121250 | 0.0    | 0.0   | 0.0    | 0.0    | 0.0   | 0.0  |
| 21UR-121260 | 0.0    | 0.0   | 0.0    | 0.0    | 0.0   | 0.0  |
| 21UR-121270 | 62.0   | 40.0  | 66.0   | 16.0   | 42.0  | 2.0  |
| 21UR-121280 | 2.0    | 0.0   | 0.0    | 0.0    | 0.0   | 1.0  |
| 21UR-121290 | 100.4  | 84.8  | 106.5  | 18.0   | 90.4  | 5.0  |
| 21UR-12130  | 72.0   | 87.0  | 81.0   | 13.0   | 162.5 | 2.0  |
| 21UR-121300 | 1.0    | 0.0   | 1.0    | 1.0    | 2.0   | 0.0  |
| 21UR-121310 | 21.5   | 6.0   | 16.0   | 8.0    | 0.0   | 0.0  |
| 21UR-121320 | 0.0    | 0.0   | 0.0    | 0.0    | 0.0   | 0.0  |
| 21UR-121330 | 5.0    | 0.0   | 0.0    | 1.0    | 0.0   | 0.0  |
| 21UR-121340 | 0.0    | 0.0   | 0.0    | 0.0    | 0.0   | 0.0  |
| 21UR-121350 | 0.0    | 0.0   | 0.0    | 0.0    | 0.0   | 0.0  |
| 21UR-121360 | 0.0    | 2.0   | 1.0    | 0.0    | 0.0   | 0.0  |
| 21UR-121370 | 0.0    | 0.0   | 0.0    | 0.0    | 0.0   | 0.0  |
| 21UR-121380 | 0.0    | 0.0   | 0.0    | 0.0    | 0.0   | 1.0  |
| 21UR-121390 | 0.0    | 0.0   | 0.0    | 0.0    | 0.0   | 0.0  |
| 21UR-12140  | 0.0    | 0.0   | 0.0    | 0.0    | 0.0   | 0.0  |
| 21UR-121400 | 0.0    | 0.0   | 0.0    | 0.0    | 0.0   | 0.0  |
| 21UR-121410 | 0.0    | 0.0   | 0.0    | 0.0    | 0.0   | 0.0  |
| 21UR-121420 | 0.0    | 0.0   | 0.0    | 0.0    | 0.0   | 0.0  |
| 21UR-121430 | 2.0    | 2.0   | 2.0    | 0.0    | 6.0   | 0.0  |
| 21UR-121440 | 0.0    | 6.0   | 0.0    | 1.0    | 10.0  | 0.0  |
| 21UR-121450 | 0.0    | 0.1   | 0.0    | 0.0    | 0.0   | 0.0  |
| 21UR-121460 | 0.0    | 0.0   | 0.0    | 0.0    | 0.0   | 0.0  |
| 21UR-121470 | 0.0    | 0.0   | 0.0    | 0.0    | 0.0   | 0.0  |
| 21UR-121480 | 1.0    | 0.0   | 1.0    | 1.0    | 0.0   | 0.0  |
| 21UR-121490 | 0.0    | 0.0   | 1.0    | 0.0    | 0.0   | 0.0  |
| 21UR-12150  | 6.0    | 30.0  | 4.0    | 4.0    | 18.0  | 4.0  |
| 21UR-121500 | 0.0    | 0.0   | 0.0    | 0.0    | 1.0   | 0.0  |
| 21UR-121510 | 0.0    | 0.0   | 0.0    | 0.0    | 0.0   | 0.0  |
| 21UR-121520 | 0.0    | 1.0   | 0.0    | 0.0    | 0.0   | 0.0  |
| 21UR-121530 | 0.0    | 0.0   | 0.0    | 0.0    | 0.0   | 0.0  |
| 21UR-121540 | 1.0    | 0.0   | 0.0    | 0.0    | 0.0   | 0.0  |
| 21UR-121550 | 0.0    | 0.0   | 0.0    | 0.0    | 0.0   | 0.0  |
| 21UR-121560 | 0.0    | 0.0   | 0.0    | 0.0    | 1.0   | 0.0  |
| 21UR-121570 | 0.0    | 0.0   | 0.0    | 0.0    | 0.0   | 0.0  |
| 21UR-121580 | 0.0    | 0.0   | 0.0    | 0.0    | 0.0   | 0.0  |
| 21UR-121590 | 0.0    | 0.0   | 0.0    | 0.0    | 0.0   | 0.0  |

|             |       |      |       |      |       |     |
|-------------|-------|------|-------|------|-------|-----|
| 21UR-12160  | 43.0  | 8.8  | 37.0  | 14.0 | 19.0  | 1.0 |
| 21UR-121600 | 0.0   | 0.0  | 2.0   | 0.0  | 0.0   | 0.0 |
| 21UR-121610 | 0.0   | 0.0  | 0.0   | 0.0  | 0.0   | 0.0 |
| 21UR-121620 | 0.0   | 0.0  | 0.0   | 0.0  | 0.0   | 0.0 |
| 21UR-121630 | 0.0   | 0.0  | 0.0   | 0.0  | 0.0   | 0.0 |
| 21UR-121640 | 2.0   | 0.0  | 3.0   | 0.0  | 2.0   | 0.0 |
| 21UR-121650 | 0.0   | 0.0  | 0.0   | 0.0  | 0.0   | 0.0 |
| 21UR-121660 | 0.0   | 0.0  | 6.0   | 0.0  | 0.0   | 0.0 |
| 21UR-121670 | 0.0   | 1.0  | 0.0   | 0.0  | 0.3   | 0.1 |
| 21UR-121680 | 0.0   | 0.0  | 0.0   | 0.0  | 0.0   | 0.0 |
| 21UR-121690 | 16.0  | 15.1 | 13.0  | 6.0  | 69.0  | 5.0 |
| 21UR-12170  | 188.0 | 22.0 | 107.0 | 50.5 | 50.3  | 4.0 |
| 21UR-121700 | 6.0   | 7.0  | 8.0   | 0.0  | 9.0   | 2.0 |
| 21UR-121710 | 39.0  | 3.0  | 23.0  | 18.0 | 22.5  | 0.0 |
| 21UR-121720 | 1.0   | 0.0  | 0.0   | 1.0  | 1.0   | 0.0 |
| 21UR-121730 | 0.0   | 0.0  | 0.0   | 0.0  | 0.0   | 0.0 |
| 21UR-121740 | 0.0   | 0.1  | 0.0   | 0.0  | 0.0   | 0.0 |
| 21UR-121750 | 1.2   | 0.0  | 5.0   | 1.3  | 2.0   | 0.0 |
| 21UR-121760 | 0.0   | 0.0  | 0.0   | 0.0  | 1.0   | 0.0 |
| 21UR-121770 | 72.0  | 45.0 | 68.0  | 24.0 | 162.0 | 2.0 |
| 21UR-121780 | 0.0   | 2.0  | 0.0   | 0.0  | 1.0   | 0.0 |
| 21UR-121790 | 6.0   | 11.0 | 2.0   | 3.0  | 0.0   | 2.0 |
| 21UR-12180  | 99.0  | 26.1 | 80.0  | 13.0 | 60.0  | 1.0 |
| 21UR-121800 | 0.0   | 0.0  | 0.0   | 0.0  | 0.0   | 0.0 |
| 21UR-121810 | 0.0   | 0.0  | 1.0   | 0.0  | 0.0   | 0.0 |
| 21UR-121820 | 0.0   | 0.0  | 0.0   | 0.0  | 0.0   | 0.0 |
| 21UR-121840 | 0.0   | 0.0  | 0.0   | 0.0  | 2.0   | 0.0 |
| 21UR-121850 | 0.0   | 0.0  | 0.0   | 0.0  | 0.0   | 0.0 |
| 21UR-121860 | 0.0   | 0.0  | 0.0   | 0.0  | 0.0   | 0.0 |
| 21UR-121870 | 0.0   | 0.0  | 0.0   | 0.0  | 0.0   | 0.0 |
| 21UR-121880 | 0.0   | 0.0  | 0.0   | 0.0  | 0.0   | 0.0 |
| 21UR-121890 | 0.0   | 0.0  | 0.0   | 0.0  | 0.0   | 0.0 |
| 21UR-12190  | 48.5  | 26.0 | 41.0  | 13.0 | 45.0  | 4.0 |
| 21UR-121900 | 0.0   | 0.0  | 0.0   | 0.0  | 0.0   | 0.0 |
| 21UR-121910 | 0.0   | 0.1  | 0.0   | 0.0  | 0.0   | 0.1 |
| 21UR-121920 | 0.0   | 0.0  | 0.0   | 0.0  | 0.0   | 0.0 |
| 21UR-121930 | 0.0   | 0.0  | 0.0   | 0.0  | 0.0   | 0.0 |
| 21UR-121940 | 0.0   | 0.0  | 0.0   | 0.0  | 0.0   | 0.0 |
| 21UR-121950 | 0.0   | 0.0  | 0.0   | 0.0  | 0.0   | 0.0 |
| 21UR-121960 | 3.0   | 0.0  | 1.0   | 3.0  | 3.0   | 0.0 |
| 21UR-121970 | 0.0   | 0.0  | 0.0   | 0.0  | 0.0   | 0.0 |
| 21UR-121980 | 0.0   | 0.0  | 0.0   | 0.0  | 0.0   | 0.0 |
| 21UR-121990 | 1.0   | 1.5  | 1.0   | 0.0  | 2.0   | 1.0 |
| 21UR-1220   | 10.0  | 1.0  | 16.0  | 8.0  | 0.0   | 0.0 |
| 21UR-12200  | 0.0   | 0.0  | 0.0   | 0.0  | 0.0   | 0.0 |
| 21UR-122000 | 20.0  | 12.0 | 32.0  | 5.0  | 18.0  | 2.0 |
| 21UR-122010 | 0.0   | 0.0  | 0.0   | 0.0  | 0.0   | 0.0 |
| 21UR-122020 | 0.0   | 0.0  | 0.0   | 0.0  | 0.0   | 0.0 |
| 21UR-122040 | 0.0   | 0.0  | 0.0   | 0.0  | 0.0   | 0.0 |
| 21UR-122050 | 0.0   | 0.0  | 0.0   | 0.0  | 0.0   | 0.0 |
| 21UR-122060 | 0.0   | 1.0  | 0.0   | 0.0  | 0.0   | 0.0 |

|             |      |      |      |      |      |      |
|-------------|------|------|------|------|------|------|
| 21UR-122070 | 0.0  | 0.0  | 0.0  | 0.0  | 0.0  | 0.0  |
| 21UR-122080 | 0.0  | 0.0  | 0.0  | 0.0  | 0.0  | 0.0  |
| 21UR-122090 | 0.0  | 0.0  | 0.0  | 0.0  | 0.0  | 0.0  |
| 21UR-12210  | 1.0  | 0.0  | 4.0  | 0.0  | 0.0  | 0.0  |
| 21UR-122100 | 0.0  | 0.0  | 0.0  | 0.0  | 0.0  | 0.0  |
| 21UR-122110 | 1.0  | 0.0  | 0.0  | 4.0  | 0.0  | 0.0  |
| 21UR-122120 | 0.0  | 0.0  | 0.0  | 0.0  | 1.0  | 0.0  |
| 21UR-122130 | 0.0  | 0.0  | 0.0  | 0.0  | 0.0  | 0.0  |
| 21UR-122140 | 0.0  | 0.0  | 0.0  | 0.0  | 0.0  | 0.0  |
| 21UR-122150 | 0.0  | 0.0  | 0.0  | 0.0  | 0.0  | 0.0  |
| 21UR-122160 | 0.0  | 0.0  | 0.0  | 0.0  | 0.0  | 0.0  |
| 21UR-122180 | 0.0  | 0.0  | 0.0  | 0.0  | 0.0  | 0.0  |
| 21UR-122190 | 0.0  | 0.0  | 0.0  | 0.0  | 0.0  | 0.0  |
| 21UR-12220  | 42.0 | 12.0 | 30.0 | 35.0 | 1.0  | 1.0  |
| 21UR-122200 | 0.0  | 0.0  | 0.0  | 0.0  | 0.0  | 0.0  |
| 21UR-122210 | 0.0  | 0.0  | 0.0  | 0.0  | 0.0  | 0.0  |
| 21UR-122220 | 1.0  | 0.0  | 0.0  | 0.0  | 0.0  | 0.0  |
| 21UR-122230 | 0.0  | 0.0  | 0.0  | 0.0  | 0.0  | 0.0  |
| 21UR-122240 | 0.0  | 0.0  | 0.0  | 0.0  | 0.0  | 1.0  |
| 21UR-122250 | 0.0  | 0.0  | 0.0  | 0.0  | 0.0  | 0.0  |
| 21UR-122260 | 38.0 | 27.5 | 14.0 | 10.5 | 72.6 | 35.0 |
| 21UR-122270 | 0.0  | 0.0  | 0.0  | 0.0  | 0.0  | 0.0  |
| 21UR-122280 | 0.0  | 0.0  | 0.0  | 0.0  | 0.0  | 0.0  |
| 21UR-122290 | 0.0  | 0.0  | 0.0  | 0.0  | 0.0  | 0.0  |
| 21UR-12230  | 0.0  | 0.0  | 0.0  | 0.0  | 0.0  | 0.0  |
| 21UR-122300 | 0.0  | 0.0  | 0.0  | 0.0  | 0.0  | 0.0  |
| 21UR-122310 | 0.0  | 0.0  | 0.0  | 0.0  | 0.0  | 0.0  |
| 21UR-122320 | 0.0  | 0.0  | 0.0  | 0.0  | 0.0  | 0.0  |
| 21UR-122330 | 0.0  | 0.0  | 0.0  | 0.0  | 0.0  | 0.0  |
| 21UR-122340 | 29.0 | 4.0  | 25.0 | 12.0 | 8.0  | 1.0  |
| 21UR-122350 | 0.0  | 0.1  | 0.0  | 0.0  | 0.0  | 0.0  |
| 21UR-122360 | 0.0  | 0.0  | 0.0  | 0.0  | 0.0  | 0.0  |
| 21UR-122370 | 0.0  | 0.0  | 0.0  | 0.0  | 0.0  | 0.0  |
| 21UR-122380 | 0.0  | 0.0  | 0.0  | 0.0  | 1.0  | 0.0  |
| 21UR-122390 | 0.0  | 0.0  | 0.0  | 0.0  | 0.0  | 0.0  |
| 21UR-12240  | 0.0  | 0.0  | 0.0  | 0.0  | 0.0  | 0.0  |
| 21UR-122400 | 0.0  | 0.0  | 0.0  | 0.0  | 0.0  | 0.0  |
| 21UR-122410 | 5.0  | 0.0  | 1.0  | 0.0  | 0.0  | 0.0  |
| 21UR-122420 | 0.0  | 0.0  | 0.0  | 0.0  | 0.0  | 0.0  |
| 21UR-122430 | 0.0  | 0.0  | 0.0  | 0.0  | 0.0  | 0.0  |
| 21UR-122440 | 0.0  | 0.0  | 0.0  | 0.0  | 0.0  | 0.0  |
| 21UR-122450 | 0.0  | 0.0  | 0.0  | 0.0  | 0.0  | 0.0  |
| 21UR-122460 | 1.0  | 0.0  | 0.0  | 0.0  | 0.0  | 0.0  |
| 21UR-122470 | 0.0  | 0.0  | 0.0  | 0.0  | 0.1  | 0.0  |
| 21UR-122480 | 7.0  | 18.0 | 19.0 | 7.0  | 40.0 | 2.0  |
| 21UR-122490 | 7.0  | 0.0  | 2.0  | 3.0  | 0.0  | 0.0  |
| 21UR-12250  | 0.0  | 1.0  | 0.0  | 0.0  | 0.0  | 0.0  |
| 21UR-122500 | 0.0  | 0.0  | 0.0  | 0.0  | 0.0  | 0.0  |
| 21UR-122510 | 0.0  | 0.0  | 0.0  | 0.0  | 2.0  | 0.0  |
| 21UR-122520 | 0.0  | 0.0  | 0.0  | 0.0  | 0.0  | 0.0  |
| 21UR-122530 | 0.0  | 1.0  | 0.0  | 0.0  | 0.0  | 0.2  |

|             |       |      |      |      |      |     |
|-------------|-------|------|------|------|------|-----|
| 21UR-122540 | 0.0   | 0.1  | 0.0  | 0.0  | 0.0  | 0.0 |
| 21UR-122550 | 1.0   | 0.0  | 0.0  | 0.0  | 0.0  | 0.0 |
| 21UR-122560 | 0.0   | 0.0  | 0.0  | 0.0  | 0.0  | 0.0 |
| 21UR-122570 | 0.0   | 0.0  | 0.0  | 0.0  | 0.0  | 0.0 |
| 21UR-122580 | 0.0   | 0.0  | 0.0  | 0.0  | 0.0  | 0.0 |
| 21UR-122590 | 0.0   | 0.0  | 0.0  | 0.0  | 0.0  | 0.0 |
| 21UR-12260  | 1.0   | 1.0  | 1.0  | 1.0  | 0.0  | 0.0 |
| 21UR-122600 | 0.0   | 0.0  | 0.0  | 0.0  | 0.0  | 0.0 |
| 21UR-122610 | 1.0   | 0.0  | 0.0  | 0.0  | 0.0  | 0.0 |
| 21UR-122630 | 0.0   | 0.0  | 0.0  | 0.0  | 0.0  | 0.0 |
| 21UR-122640 | 0.0   | 0.0  | 0.0  | 0.0  | 0.0  | 0.0 |
| 21UR-122650 | 1.0   | 0.0  | 0.0  | 0.0  | 0.0  | 0.0 |
| 21UR-122660 | 0.0   | 0.1  | 0.0  | 0.0  | 0.0  | 0.0 |
| 21UR-122670 | 1.0   | 0.0  | 1.0  | 0.0  | 1.0  | 0.0 |
| 21UR-122680 | 1.0   | 1.0  | 1.0  | 1.0  | 3.0  | 1.0 |
| 21UR-122690 | 2.0   | 1.0  | 7.0  | 2.0  | 0.0  | 0.0 |
| 21UR-12270  | 0.0   | 1.0  | 0.0  | 0.0  | 0.0  | 0.0 |
| 21UR-122700 | 137.0 | 11.0 | 72.0 | 46.0 | 10.0 | 1.0 |
| 21UR-122710 | 0.0   | 0.0  | 0.0  | 0.0  | 0.0  | 0.0 |
| 21UR-122720 | 0.0   | 0.0  | 0.0  | 0.0  | 0.0  | 0.0 |
| 21UR-122730 | 2.0   | 0.0  | 3.0  | 0.0  | 0.0  | 0.0 |
| 21UR-122740 | 2.8   | 0.0  | 2.0  | 0.0  | 1.0  | 0.0 |
| 21UR-122750 | 2.0   | 0.0  | 2.0  | 1.0  | 3.0  | 0.0 |
| 21UR-122760 | 0.0   | 0.0  | 0.0  | 0.0  | 0.0  | 0.0 |
| 21UR-122770 | 0.0   | 0.0  | 1.0  | 0.0  | 0.0  | 0.0 |
| 21UR-122780 | 5.0   | 2.0  | 7.0  | 0.0  | 3.0  | 0.0 |
| 21UR-122790 | 0.0   | 0.0  | 0.0  | 0.0  | 0.0  | 0.0 |
| 21UR-12280  | 1.0   | 0.0  | 1.0  | 0.0  | 4.0  | 0.0 |
| 21UR-122800 | 8.0   | 0.0  | 1.0  | 0.0  | 0.0  | 0.0 |
| 21UR-122810 | 1.0   | 0.0  | 0.0  | 0.0  | 0.0  | 0.0 |
| 21UR-122820 | 0.0   | 0.0  | 0.0  | 0.0  | 0.0  | 0.0 |
| 21UR-122830 | 1.0   | 0.0  | 2.0  | 0.0  | 0.0  | 0.0 |
| 21UR-122840 | 0.0   | 0.0  | 0.0  | 0.0  | 0.0  | 0.0 |
| 21UR-122850 | 0.0   | 0.0  | 0.0  | 0.0  | 0.0  | 0.0 |
| 21UR-122860 | 6.0   | 0.0  | 1.0  | 4.0  | 0.0  | 0.0 |
| 21UR-122870 | 0.0   | 0.0  | 0.0  | 0.0  | 1.0  | 0.0 |
| 21UR-122880 | 0.0   | 0.0  | 0.0  | 0.0  | 0.0  | 0.0 |
| 21UR-122890 | 5.0   | 16.0 | 2.0  | 1.0  | 9.0  | 0.0 |
| 21UR-12290  | 1.0   | 0.0  | 0.0  | 0.0  | 1.0  | 0.0 |
| 21UR-122900 | 0.0   | 0.0  | 0.0  | 0.0  | 0.0  | 0.0 |
| 21UR-122910 | 2.0   | 0.0  | 2.0  | 0.0  | 0.0  | 0.0 |
| 21UR-122920 | 3.0   | 0.0  | 0.0  | 0.0  | 0.1  | 0.0 |
| 21UR-122930 | 0.0   | 0.0  | 0.0  | 0.0  | 0.0  | 0.0 |
| 21UR-122940 | 0.0   | 0.0  | 0.0  | 0.0  | 1.0  | 0.0 |
| 21UR-122950 | 0.0   | 0.0  | 0.0  | 0.0  | 0.0  | 0.0 |
| 21UR-122960 | 0.0   | 0.1  | 0.0  | 0.0  | 1.0  | 0.0 |
| 21UR-122970 | 0.0   | 0.0  | 0.0  | 0.0  | 0.0  | 0.0 |
| 21UR-122980 | 0.0   | 0.0  | 0.0  | 0.0  | 0.0  | 0.0 |
| 21UR-122990 | 0.0   | 0.0  | 0.0  | 0.0  | 0.0  | 0.0 |
| 21UR-1230   | 1.0   | 4.0  | 1.0  | 0.0  | 1.0  | 0.0 |
| 21UR-12300  | 0.0   | 1.0  | 0.0  | 0.0  | 1.0  | 1.0 |

|             |      |      |      |      |      |     |
|-------------|------|------|------|------|------|-----|
| 21UR-123000 | 0.0  | 1.0  | 0.0  | 0.0  | 0.0  | 0.0 |
| 21UR-123010 | 0.0  | 0.0  | 0.0  | 0.0  | 0.0  | 0.0 |
| 21UR-123020 | 0.0  | 0.0  | 0.0  | 0.0  | 0.0  | 0.0 |
| 21UR-123030 | 0.0  | 0.0  | 0.0  | 0.0  | 0.0  | 0.0 |
| 21UR-123040 | 0.0  | 0.0  | 0.0  | 0.0  | 0.0  | 0.0 |
| 21UR-123050 | 1.0  | 1.0  | 0.0  | 0.0  | 0.0  | 0.0 |
| 21UR-123060 | 0.0  | 0.0  | 0.0  | 0.0  | 0.0  | 0.0 |
| 21UR-123070 | 0.0  | 1.0  | 0.0  | 0.0  | 0.0  | 0.0 |
| 21UR-123080 | 9.0  | 18.0 | 4.0  | 1.0  | 6.0  | 0.0 |
| 21UR-123090 | 0.0  | 0.0  | 0.0  | 0.0  | 0.0  | 0.0 |
| 21UR-12310  | 0.0  | 0.0  | 0.0  | 0.0  | 0.0  | 0.0 |
| 21UR-123100 | 0.0  | 0.0  | 0.0  | 0.0  | 0.0  | 0.0 |
| 21UR-123110 | 0.0  | 0.0  | 0.0  | 0.0  | 0.0  | 0.0 |
| 21UR-123120 | 0.0  | 0.0  | 0.0  | 0.0  | 0.0  | 0.0 |
| 21UR-123130 | 0.0  | 1.0  | 0.0  | 0.0  | 0.0  | 1.0 |
| 21UR-123140 | 0.0  | 1.0  | 0.0  | 0.0  | 1.0  | 0.0 |
| 21UR-123150 | 2.0  | 0.0  | 0.0  | 0.0  | 0.0  | 0.0 |
| 21UR-123160 | 4.0  | 0.0  | 1.0  | 1.0  | 3.0  | 0.0 |
| 21UR-123170 | 0.0  | 0.0  | 0.0  | 0.0  | 0.0  | 0.0 |
| 21UR-123180 | 0.0  | 0.0  | 0.0  | 0.0  | 1.0  | 0.0 |
| 21UR-123190 | 3.0  | 20.5 | 5.0  | 3.0  | 16.0 | 6.0 |
| 21UR-12320  | 0.0  | 0.0  | 0.0  | 0.0  | 6.0  | 0.0 |
| 21UR-123200 | 0.0  | 0.0  | 0.0  | 0.0  | 0.0  | 0.0 |
| 21UR-123210 | 0.0  | 0.0  | 0.0  | 0.0  | 0.0  | 0.0 |
| 21UR-123220 | 0.0  | 0.0  | 0.0  | 0.0  | 0.0  | 0.0 |
| 21UR-123230 | 0.0  | 0.2  | 0.0  | 0.0  | 0.0  | 0.0 |
| 21UR-123240 | 90.0 | 12.0 | 85.0 | 25.0 | 16.0 | 2.0 |
| 21UR-123250 | 0.0  | 0.0  | 0.0  | 0.0  | 0.0  | 0.8 |
| 21UR-123260 | 0.0  | 0.0  | 0.0  | 0.0  | 0.0  | 0.0 |
| 21UR-123270 | 0.0  | 0.0  | 0.0  | 0.0  | 0.0  | 0.0 |
| 21UR-123280 | 0.0  | 0.0  | 0.0  | 0.0  | 0.0  | 0.0 |
| 21UR-123290 | 0.0  | 0.0  | 0.0  | 0.0  | 0.0  | 0.0 |
| 21UR-12330  | 6.0  | 8.0  | 26.0 | 17.0 | 10.0 | 1.0 |
| 21UR-123300 | 0.0  | 0.0  | 0.0  | 0.0  | 0.0  | 0.0 |
| 21UR-123310 | 0.0  | 0.0  | 0.0  | 0.0  | 0.0  | 0.0 |
| 21UR-123320 | 0.0  | 0.0  | 1.0  | 0.0  | 0.0  | 0.0 |
| 21UR-123330 | 2.0  | 0.0  | 0.0  | 0.0  | 0.0  | 0.0 |
| 21UR-123340 | 0.0  | 0.0  | 0.0  | 0.0  | 0.0  | 0.0 |
| 21UR-123350 | 0.0  | 0.0  | 0.0  | 0.0  | 0.0  | 0.0 |
| 21UR-123360 | 0.0  | 0.0  | 0.0  | 0.0  | 0.0  | 0.0 |
| 21UR-123370 | 0.0  | 0.0  | 0.0  | 0.0  | 0.0  | 0.0 |
| 21UR-123380 | 0.0  | 1.0  | 0.0  | 0.0  | 0.0  | 0.0 |
| 21UR-123390 | 0.0  | 0.0  | 0.0  | 0.0  | 0.0  | 0.0 |
| 21UR-12340  | 0.0  | 0.1  | 0.0  | 1.0  | 0.0  | 0.0 |
| 21UR-123400 | 0.0  | 0.0  | 1.0  | 0.0  | 0.0  | 0.0 |
| 21UR-123410 | 4.0  | 0.0  | 5.0  | 6.0  | 0.0  | 1.0 |
| 21UR-123420 | 0.0  | 1.0  | 0.0  | 0.0  | 0.0  | 0.0 |
| 21UR-123430 | 6.0  | 22.2 | 6.0  | 1.0  | 19.3 | 0.0 |
| 21UR-123440 | 0.0  | 0.0  | 0.0  | 0.0  | 0.0  | 0.0 |
| 21UR-123450 | 1.0  | 3.0  | 2.0  | 0.0  | 8.0  | 0.0 |
| 21UR-123460 | 0.0  | 0.0  | 0.0  | 0.0  | 0.0  | 0.0 |

|             |      |       |       |      |      |      |
|-------------|------|-------|-------|------|------|------|
| 21UR-123470 | 0.0  | 0.0   | 0.0   | 0.0  | 0.0  | 0.0  |
| 21UR-123480 | 0.0  | 0.0   | 0.0   | 0.0  | 0.0  | 0.0  |
| 21UR-123490 | 22.0 | 35.0  | 35.0  | 14.5 | 35.0 | 0.0  |
| 21UR-12350  | 5.0  | 1.0   | 2.0   | 0.0  | 0.0  | 0.0  |
| 21UR-123500 | 0.0  | 0.0   | 0.0   | 0.0  | 0.0  | 0.0  |
| 21UR-123510 | 90.5 | 182.0 | 106.0 | 35.3 | 75.0 | 22.0 |
| 21UR-123520 | 1.0  | 0.0   | 1.0   | 0.0  | 0.0  | 0.0  |
| 21UR-123530 | 0.0  | 0.0   | 0.0   | 0.0  | 0.0  | 0.0  |
| 21UR-123540 | 1.0  | 1.0   | 0.0   | 0.0  | 2.0  | 0.0  |
| 21UR-123550 | 1.0  | 0.0   | 4.0   | 0.0  | 10.0 | 0.0  |
| 21UR-123560 | 0.0  | 0.0   | 0.0   | 0.0  | 0.0  | 0.0  |
| 21UR-123570 | 0.0  | 0.0   | 0.0   | 0.0  | 0.0  | 0.0  |
| 21UR-123580 | 0.0  | 0.0   | 0.0   | 0.0  | 0.0  | 0.0  |
| 21UR-123590 | 0.0  | 0.0   | 0.0   | 0.0  | 0.0  | 0.0  |
| 21UR-12360  | 6.0  | 1.0   | 1.0   | 0.0  | 13.0 | 2.0  |
| 21UR-123600 | 18.0 | 2.0   | 25.0  | 14.0 | 11.0 | 2.0  |
| 21UR-123610 | 0.0  | 0.0   | 0.0   | 0.0  | 1.0  | 0.0  |
| 21UR-123620 | 0.0  | 0.0   | 0.0   | 0.0  | 0.0  | 0.0  |
| 21UR-123630 | 60.0 | 8.0   | 57.0  | 19.0 | 26.0 | 1.0  |
| 21UR-123640 | 0.0  | 2.0   | 2.0   | 0.0  | 2.0  | 2.0  |
| 21UR-123650 | 0.0  | 1.0   | 0.0   | 0.0  | 1.0  | 0.0  |
| 21UR-123660 | 0.0  | 0.0   | 0.0   | 0.0  | 0.0  | 0.0  |
| 21UR-123670 | 0.0  | 0.0   | 0.0   | 0.0  | 0.0  | 0.0  |
| 21UR-123680 | 0.0  | 0.0   | 0.0   | 0.0  | 0.0  | 0.0  |
| 21UR-123690 | 0.0  | 0.0   | 0.0   | 0.0  | 0.0  | 0.0  |
| 21UR-12370  | 30.0 | 36.0  | 14.0  | 0.0  | 15.0 | 1.0  |
| 21UR-123700 | 1.0  | 0.0   | 2.0   | 1.0  | 0.0  | 0.0  |
| 21UR-123710 | 19.0 | 17.0  | 13.0  | 5.0  | 45.0 | 5.0  |
| 21UR-123720 | 0.0  | 0.0   | 0.0   | 0.0  | 0.0  | 0.0  |
| 21UR-123730 | 0.0  | 0.0   | 4.0   | 4.0  | 0.0  | 0.0  |
| 21UR-123740 | 0.0  | 0.0   | 0.0   | 0.0  | 0.0  | 0.0  |
| 21UR-123750 | 0.0  | 0.0   | 0.0   | 0.0  | 0.0  | 0.0  |
| 21UR-123760 | 0.0  | 0.0   | 0.0   | 0.0  | 0.0  | 0.0  |
| 21UR-123770 | 0.0  | 0.0   | 0.0   | 0.0  | 0.0  | 0.0  |
| 21UR-123780 | 0.0  | 0.0   | 0.0   | 0.0  | 0.0  | 0.0  |
| 21UR-123790 | 0.0  | 0.0   | 0.0   | 0.0  | 0.0  | 0.0  |
| 21UR-12380  | 14.0 | 12.0  | 19.0  | 8.0  | 5.0  | 2.0  |
| 21UR-123800 | 0.0  | 0.0   | 0.0   | 0.0  | 0.0  | 0.0  |
| 21UR-123810 | 1.0  | 0.0   | 0.0   | 0.0  | 0.0  | 0.0  |
| 21UR-123820 | 0.0  | 0.0   | 0.0   | 0.0  | 0.0  | 0.0  |
| 21UR-123830 | 0.0  | 0.0   | 0.0   | 0.0  | 0.0  | 0.0  |
| 21UR-123840 | 6.0  | 4.0   | 6.0   | 1.0  | 2.0  | 0.0  |
| 21UR-123850 | 0.0  | 0.0   | 1.0   | 1.0  | 1.0  | 0.1  |
| 21UR-123860 | 0.0  | 0.0   | 0.0   | 0.0  | 0.0  | 0.0  |
| 21UR-123870 | 0.0  | 0.0   | 0.0   | 0.0  | 0.0  | 0.0  |
| 21UR-123880 | 0.0  | 0.0   | 0.0   | 0.0  | 1.0  | 0.0  |
| 21UR-123890 | 2.0  | 1.0   | 1.0   | 0.0  | 1.0  | 0.0  |
| 21UR-12390  | 1.0  | 0.0   | 6.0   | 1.0  | 0.0  | 1.0  |
| 21UR-123900 | 0.0  | 0.0   | 0.0   | 0.0  | 0.0  | 1.0  |
| 21UR-123910 | 4.0  | 0.0   | 0.0   | 0.0  | 0.0  | 0.0  |
| 21UR-123920 | 0.0  | 0.0   | 0.0   | 1.0  | 0.0  | 1.0  |

|             |       |       |       |      |       |      |
|-------------|-------|-------|-------|------|-------|------|
| 21UR-123930 | 0.0   | 0.0   | 0.0   | 0.0  | 0.0   | 0.0  |
| 21UR-123940 | 0.0   | 0.0   | 0.0   | 0.0  | 0.0   | 0.0  |
| 21UR-123950 | 0.0   | 0.0   | 0.0   | 0.0  | 0.0   | 0.0  |
| 21UR-123960 | 1.0   | 0.0   | 1.0   | 0.0  | 1.0   | 0.0  |
| 21UR-123970 | 3.0   | 1.0   | 1.0   | 2.0  | 2.0   | 0.0  |
| 21UR-123980 | 0.0   | 0.0   | 0.0   | 1.0  | 1.0   | 0.0  |
| 21UR-123990 | 37.0  | 12.0  | 27.0  | 6.5  | 12.0  | 3.0  |
| 21UR-1240   | 10.0  | 8.0   | 7.0   | 0.0  | 4.0   | 0.0  |
| 21UR-12400  | 6.0   | 0.0   | 8.0   | 4.0  | 0.0   | 1.0  |
| 21UR-124000 | 1.0   | 0.0   | 0.0   | 0.0  | 0.0   | 0.0  |
| 21UR-124010 | 150.5 | 209.0 | 134.0 | 78.0 | 139.5 | 36.0 |
| 21UR-124020 | 0.0   | 0.0   | 0.0   | 0.0  | 1.0   | 0.0  |
| 21UR-124030 | 7.0   | 8.0   | 14.0  | 0.0  | 10.0  | 0.0  |
| 21UR-124040 | 0.0   | 0.0   | 0.0   | 0.0  | 0.0   | 0.0  |
| 21UR-124050 | 0.0   | 1.0   | 0.0   | 0.0  | 0.0   | 4.0  |
| 21UR-124060 | 0.0   | 0.0   | 0.0   | 0.0  | 0.0   | 0.0  |
| 21UR-124070 | 0.0   | 0.0   | 0.0   | 0.0  | 0.0   | 0.0  |
| 21UR-124080 | 0.0   | 0.0   | 0.0   | 0.0  | 0.0   | 0.0  |
| 21UR-124090 | 2.0   | 3.0   | 0.0   | 0.0  | 2.0   | 0.0  |
| 21UR-12410  | 4.0   | 1.0   | 4.0   | 1.0  | 1.0   | 0.0  |
| 21UR-124100 | 0.0   | 0.0   | 0.0   | 0.0  | 2.0   | 0.0  |
| 21UR-124110 | 0.0   | 2.0   | 0.0   | 0.0  | 0.0   | 0.0  |
| 21UR-124120 | 0.0   | 0.0   | 0.0   | 0.0  | 3.0   | 0.0  |
| 21UR-124130 | 2.0   | 1.0   | 1.0   | 0.0  | 5.0   | 1.0  |
| 21UR-124140 | 0.0   | 0.0   | 0.0   | 0.0  | 0.0   | 0.0  |
| 21UR-124150 | 9.0   | 0.0   | 8.0   | 2.0  | 1.0   | 0.0  |
| 21UR-124160 | 4.0   | 2.0   | 3.0   | 0.0  | 5.0   | 0.0  |
| 21UR-124170 | 12.0  | 2.0   | 9.0   | 0.0  | 2.0   | 0.0  |
| 21UR-124180 | 0.0   | 0.0   | 0.0   | 0.0  | 0.0   | 0.0  |
| 21UR-124190 | 0.0   | 0.0   | 0.0   | 0.0  | 0.0   | 0.0  |
| 21UR-12420  | 90.0  | 5.0   | 70.0  | 12.0 | 15.0  | 1.0  |
| 21UR-124200 | 1.0   | 0.0   | 0.0   | 0.0  | 1.0   | 0.0  |
| 21UR-124210 | 0.0   | 2.0   | 0.0   | 0.0  | 0.0   | 0.0  |
| 21UR-124220 | 2.0   | 0.0   | 4.0   | 1.0  | 6.0   | 0.0  |
| 21UR-124230 | 1.0   | 0.0   | 1.0   | 0.0  | 0.0   | 0.0  |
| 21UR-124240 | 0.0   | 0.0   | 0.0   | 0.0  | 1.0   | 0.0  |
| 21UR-124250 | 0.0   | 0.0   | 0.0   | 0.0  | 0.0   | 0.0  |
| 21UR-124260 | 1.0   | 0.0   | 0.0   | 0.0  | 1.0   | 0.0  |
| 21UR-124270 | 26.0  | 1.0   | 23.0  | 3.0  | 0.0   | 0.0  |
| 21UR-124280 | 1.0   | 0.0   | 0.0   | 0.0  | 1.0   | 4.0  |
| 21UR-124290 | 6.0   | 0.0   | 6.0   | 4.0  | 3.0   | 0.0  |
| 21UR-12430  | 0.0   | 0.0   | 0.0   | 0.0  | 0.0   | 0.0  |
| 21UR-124300 | 0.0   | 0.0   | 0.0   | 0.0  | 0.0   | 0.0  |
| 21UR-124310 | 0.0   | 0.0   | 0.0   | 0.0  | 0.0   | 0.0  |
| 21UR-124320 | 0.0   | 0.0   | 0.0   | 0.0  | 0.0   | 0.0  |
| 21UR-124330 | 0.0   | 0.0   | 0.0   | 0.0  | 0.0   | 0.0  |
| 21UR-124340 | 1.0   | 0.0   | 1.0   | 0.0  | 0.0   | 0.0  |
| 21UR-124350 | 0.0   | 0.0   | 0.0   | 0.0  | 0.0   | 0.0  |
| 21UR-124360 | 1.0   | 0.0   | 0.0   | 0.0  | 0.0   | 0.0  |
| 21UR-124370 | 0.0   | 0.0   | 0.0   | 0.0  | 1.0   | 0.0  |
| 21UR-124380 | 0.0   | 0.0   | 0.0   | 0.0  | 0.0   | 0.0  |



|             |        |       |        |        |       |      |
|-------------|--------|-------|--------|--------|-------|------|
| 21UR-124390 | 0.0    | 0.0   | 0.0    | 0.0    | 0.0   | 0.0  |
| 21UR-12440  | 0.0    | 0.0   | 0.0    | 0.0    | 0.0   | 0.0  |
| 21UR-124400 | 0.0    | 0.0   | 0.0    | 0.0    | 0.0   | 0.0  |
| 21UR-124410 | 0.0    | 0.0   | 0.0    | 0.0    | 0.0   | 0.0  |
| 21UR-124420 | 0.0    | 0.0   | 0.0    | 0.0    | 0.0   | 0.0  |
| 21UR-124430 | 0.0    | 0.0   | 0.0    | 0.0    | 0.0   | 0.0  |
| 21UR-124440 | 0.0    | 0.0   | 0.0    | 0.0    | 2.0   | 0.0  |
| 21UR-124450 | 0.0    | 0.0   | 0.0    | 0.0    | 0.0   | 0.0  |
| 21UR-124460 | 0.0    | 0.0   | 0.0    | 0.0    | 0.0   | 0.0  |
| 21UR-124470 | 0.0    | 0.0   | 0.0    | 0.0    | 1.0   | 0.0  |
| 21UR-124480 | 64.3   | 2.3   | 69.5   | 16.0   | 2.0   | 0.0  |
| 21UR-124490 | 3.0    | 0.0   | 2.0    | 0.0    | 3.0   | 0.0  |
| 21UR-12450  | 11.0   | 5.0   | 18.0   | 1.0    | 4.0   | 0.0  |
| 21UR-124500 | 3.0    | 1.0   | 0.0    | 0.0    | 0.0   | 1.0  |
| 21UR-124510 | 10.0   | 8.0   | 13.0   | 0.0    | 13.0  | 1.0  |
| 21UR-124520 | 0.0    | 0.0   | 0.0    | 0.0    | 0.0   | 0.0  |
| 21UR-124530 | 4.0    | 5.5   | 1.0    | 0.0    | 0.0   | 0.0  |
| 21UR-124540 | 0.0    | 0.0   | 0.0    | 0.0    | 0.0   | 0.0  |
| 21UR-124550 | 0.0    | 0.0   | 1.0    | 0.0    | 3.0   | 0.0  |
| 21UR-124570 | 0.0    | 0.1   | 0.0    | 0.0    | 0.0   | 0.3  |
| 21UR-124580 | 0.0    | 0.0   | 0.0    | 0.0    | 0.0   | 0.0  |
| 21UR-124590 | 5.0    | 0.0   | 5.0    | 1.0    | 0.0   | 0.0  |
| 21UR-12460  | 1.0    | 1.0   | 0.0    | 7.0    | 12.0  | 0.0  |
| 21UR-124600 | 0.0    | 0.0   | 0.0    | 0.0    | 0.0   | 0.0  |
| 21UR-124610 | 0.0    | 0.0   | 0.0    | 0.0    | 0.0   | 0.0  |
| 21UR-124620 | 49.0   | 174.0 | 44.0   | 26.0   | 163.5 | 10.0 |
| 21UR-124630 | 0.0    | 0.0   | 0.0    | 0.0    | 0.0   | 0.0  |
| 21UR-124640 | 0.0    | 0.0   | 0.0    | 0.0    | 0.0   | 0.0  |
| 21UR-124650 | 0.0    | 0.0   | 0.0    | 0.0    | 0.0   | 0.0  |
| 21UR-124660 | 0.0    | 1.1   | 1.0    | 0.0    | 0.0   | 0.0  |
| 21UR-124670 | 5.0    | 1.0   | 5.0    | 0.0    | 0.0   | 0.0  |
| 21UR-124680 | 0.0    | 0.0   | 0.0    | 0.0    | 0.0   | 0.0  |
| 21UR-124690 | 0.0    | 0.0   | 1.0    | 0.0    | 0.0   | 0.0  |
| 21UR-12470  | 7.0    | 1.0   | 4.0    | 4.0    | 1.0   | 3.0  |
| 21UR-124700 | 2.0    | 0.0   | 0.0    | 0.0    | 0.0   | 0.0  |
| 21UR-124710 | 0.0    | 0.0   | 0.0    | 0.0    | 0.0   | 0.0  |
| 21UR-124720 | 4166.3 | 291.0 | 2836.0 | 1016.0 | 295.0 | 33.0 |
| 21UR-124730 | 27.0   | 1.0   | 33.0   | 13.0   | 3.0   | 0.0  |
| 21UR-124740 | 0.0    | 0.0   | 0.0    | 0.0    | 0.0   | 0.0  |
| 21UR-124760 | 4.0    | 12.0  | 0.0    | 0.0    | 1.0   | 2.0  |
| 21UR-124770 | 0.0    | 0.0   | 0.0    | 0.0    | 0.0   | 0.0  |
| 21UR-124780 | 4.0    | 0.0   | 10.0   | 1.0    | 0.0   | 0.0  |
| 21UR-124790 | 0.0    | 0.0   | 0.0    | 0.0    | 0.0   | 0.0  |
| 21UR-12480  | 0.0    | 0.0   | 0.0    | 0.0    | 1.0   | 0.0  |
| 21UR-124800 | 1.0    | 4.0   | 3.0    | 0.0    | 0.0   | 0.0  |
| 21UR-124810 | 0.0    | 0.0   | 0.0    | 0.0    | 0.0   | 0.0  |
| 21UR-124820 | 0.0    | 0.0   | 0.0    | 0.0    | 0.0   | 0.0  |
| 21UR-124840 | 30.0   | 6.1   | 21.0   | 6.0    | 26.0  | 0.1  |
| 21UR-124850 | 0.0    | 0.0   | 0.0    | 0.0    | 0.0   | 0.0  |
| 21UR-124860 | 1.0    | 0.0   | 1.0    | 0.0    | 2.0   | 0.0  |
| 21UR-124870 | 0.0    | 0.0   | 0.0    | 0.0    | 0.0   | 0.0  |

|             |        |       |        |       |       |      |
|-------------|--------|-------|--------|-------|-------|------|
| 21UR-124880 | 0.0    | 1.0   | 0.0    | 0.0   | 0.0   | 0.0  |
| 21UR-124890 | 0.0    | 0.0   | 0.0    | 0.0   | 0.0   | 0.0  |
| 21UR-12490  | 70.0   | 18.0  | 58.5   | 46.0  | 11.0  | 1.0  |
| 21UR-124900 | 0.0    | 0.0   | 0.0    | 0.0   | 0.0   | 0.0  |
| 21UR-124910 | 0.0    | 0.0   | 0.0    | 0.0   | 0.0   | 0.0  |
| 21UR-124920 | 0.0    | 0.0   | 1.0    | 0.0   | 0.0   | 0.0  |
| 21UR-124930 | 0.0    | 0.0   | 0.0    | 0.0   | 0.0   | 0.0  |
| 21UR-124940 | 4.0    | 3.0   | 17.0   | 9.0   | 8.0   | 1.0  |
| 21UR-124950 | 0.0    | 0.0   | 0.0    | 0.0   | 0.0   | 0.0  |
| 21UR-124960 | 0.0    | 0.0   | 0.0    | 0.0   | 2.0   | 0.0  |
| 21UR-124970 | 0.0    | 0.0   | 0.0    | 0.0   | 0.0   | 0.0  |
| 21UR-124980 | 0.0    | 0.0   | 0.0    | 0.0   | 0.0   | 0.0  |
| 21UR-124990 | 0.0    | 0.0   | 0.0    | 0.0   | 0.0   | 0.0  |
| 21UR-1250   | 8.0    | 0.0   | 8.0    | 6.0   | 1.0   | 4.0  |
| 21UR-12500  | 3.0    | 1.0   | 0.0    | 1.0   | 2.0   | 0.0  |
| 21UR-125000 | 0.0    | 0.0   | 0.0    | 0.0   | 0.0   | 0.0  |
| 21UR-125010 | 0.0    | 0.0   | 0.0    | 0.0   | 0.0   | 0.0  |
| 21UR-125020 | 0.0    | 0.0   | 0.0    | 0.0   | 0.0   | 0.0  |
| 21UR-125030 | 0.0    | 0.0   | 0.0    | 0.0   | 0.0   | 0.1  |
| 21UR-125040 | 0.0    | 0.0   | 0.0    | 0.0   | 0.0   | 0.0  |
| 21UR-125050 | 0.0    | 0.0   | 0.0    | 0.0   | 0.0   | 0.0  |
| 21UR-125060 | 15.0   | 27.0  | 16.0   | 16.0  | 50.0  | 3.0  |
| 21UR-125070 | 26.0   | 0.0   | 15.0   | 6.0   | 0.0   | 0.0  |
| 21UR-125080 | 0.0    | 0.0   | 0.0    | 0.0   | 0.0   | 0.0  |
| 21UR-125090 | 0.0    | 21.0  | 1.0    | 0.0   | 1.0   | 0.0  |
| 21UR-12510  | 127.0  | 8.0   | 65.0   | 32.5  | 17.0  | 0.0  |
| 21UR-125100 | 200.0  | 37.0  | 228.0  | 124.0 | 55.5  | 8.0  |
| 21UR-125110 | 0.0    | 0.0   | 0.0    | 0.0   | 0.0   | 0.0  |
| 21UR-125120 | 0.0    | 0.0   | 0.0    | 0.0   | 0.0   | 0.0  |
| 21UR-125130 | 0.0    | 1.0   | 1.0    | 0.0   | 0.0   | 0.0  |
| 21UR-125140 | 0.0    | 0.0   | 0.0    | 0.0   | 0.0   | 0.0  |
| 21UR-125150 | 1.0    | 1.0   | 1.0    | 2.0   | 0.0   | 0.0  |
| 21UR-125160 | 0.0    | 0.0   | 0.0    | 0.0   | 0.0   | 0.0  |
| 21UR-125170 | 0.0    | 0.0   | 0.0    | 0.0   | 1.0   | 0.0  |
| 21UR-125180 | 0.0    | 0.0   | 0.0    | 0.0   | 0.0   | 0.0  |
| 21UR-125190 | 0.0    | 2.0   | 2.0    | 1.0   | 0.0   | 1.0  |
| 21UR-12520  | 0.0    | 4.0   | 0.0    | 0.0   | 6.0   | 0.0  |
| 21UR-125200 | 0.0    | 0.0   | 0.0    | 0.0   | 0.0   | 0.0  |
| 21UR-125210 | 0.0    | 0.0   | 0.0    | 0.0   | 0.0   | 0.0  |
| 21UR-125220 | 0.0    | 0.0   | 0.0    | 0.0   | 0.0   | 0.0  |
| 21UR-125230 | 0.0    | 0.0   | 0.0    | 0.0   | 0.0   | 0.0  |
| 21UR-125240 | 1.0    | 0.0   | 0.0    | 0.0   | 0.0   | 0.0  |
| 21UR-125250 | 0.0    | 0.0   | 1.0    | 0.0   | 0.0   | 0.0  |
| 21UR-125260 | 1955.0 | 195.0 | 1604.0 | 649.5 | 471.0 | 30.0 |
| 21UR-125270 | 0.0    | 2.0   | 0.0    | 1.0   | 0.0   | 0.0  |
| 21UR-125280 | 2.0    | 1.0   | 2.0    | 1.0   | 1.0   | 0.0  |
| 21UR-125290 | 4.0    | 0.0   | 0.0    | 0.0   | 0.0   | 0.0  |
| 21UR-12530  | 0.0    | 5.0   | 0.0    | 0.0   | 27.0  | 3.0  |
| 21UR-125300 | 0.0    | 0.0   | 0.0    | 0.0   | 0.0   | 0.0  |
| 21UR-125310 | 0.0    | 0.0   | 0.0    | 0.0   | 0.0   | 0.0  |
| 21UR-125320 | 0.0    | 0.0   | 0.0    | 0.0   | 0.0   | 0.0  |

|             |         |       |        |        |       |       |
|-------------|---------|-------|--------|--------|-------|-------|
| 21UR-125330 | 0.0     | 0.0   | 0.0    | 0.0    | 0.0   | 0.0   |
| 21UR-125340 | 0.0     | 0.0   | 0.0    | 0.0    | 0.0   | 0.0   |
| 21UR-125350 | 0.0     | 0.0   | 0.0    | 0.0    | 0.0   | 0.0   |
| 21UR-125370 | 0.0     | 0.0   | 0.0    | 0.0    | 0.0   | 0.0   |
| 21UR-125380 | 0.0     | 0.0   | 0.0    | 0.0    | 0.0   | 1.0   |
| 21UR-125390 | 0.0     | 0.0   | 0.0    | 1.0    | 2.0   | 0.0   |
| 21UR-12540  | 0.0     | 2.0   | 1.0    | 1.0    | 4.0   | 2.0   |
| 21UR-125400 | 0.0     | 0.0   | 0.0    | 0.0    | 0.0   | 0.0   |
| 21UR-125410 | 0.0     | 0.0   | 0.0    | 0.0    | 0.0   | 0.0   |
| 21UR-125420 | 0.0     | 0.0   | 0.0    | 0.0    | 0.0   | 0.0   |
| 21UR-125430 | 0.0     | 1.0   | 0.0    | 0.0    | 1.0   | 0.0   |
| 21UR-125440 | 0.0     | 1.0   | 0.0    | 0.0    | 0.0   | 0.0   |
| 21UR-125450 | 1.0     | 0.0   | 0.0    | 0.0    | 0.0   | 0.0   |
| 21UR-125460 | 0.0     | 0.0   | 0.0    | 0.0    | 0.0   | 0.0   |
| 21UR-125470 | 0.0     | 0.0   | 0.0    | 0.0    | 0.0   | 0.0   |
| 21UR-125480 | 0.0     | 0.0   | 0.0    | 0.0    | 0.0   | 0.0   |
| 21UR-125490 | 0.0     | 0.0   | 0.0    | 0.0    | 0.0   | 0.0   |
| 21UR-12550  | 1.0     | 0.0   | 1.0    | 1.0    | 0.0   | 0.0   |
| 21UR-125500 | 1.0     | 0.0   | 0.0    | 0.0    | 0.0   | 0.0   |
| 21UR-125510 | 0.0     | 0.0   | 0.0    | 0.0    | 0.0   | 0.0   |
| 21UR-125520 | 28.0    | 35.0  | 43.0   | 12.0   | 47.0  | 11.0  |
| 21UR-125530 | 1.0     | 1.0   | 0.0    | 0.0    | 2.0   | 1.0   |
| 21UR-125540 | 0.0     | 0.0   | 0.0    | 0.0    | 1.0   | 0.5   |
| 21UR-125550 | 0.0     | 0.0   | 0.0    | 0.0    | 0.0   | 0.0   |
| 21UR-125560 | 0.0     | 0.0   | 0.0    | 0.0    | 0.0   | 0.0   |
| 21UR-125570 | 0.0     | 0.0   | 0.0    | 0.0    | 0.0   | 0.0   |
| 21UR-125580 | 2.0     | 1.0   | 3.0    | 0.0    | 3.0   | 0.0   |
| 21UR-125590 | 0.0     | 0.0   | 0.0    | 0.0    | 0.0   | 0.0   |
| 21UR-12560  | 42.5    | 6.1   | 62.0   | 12.0   | 21.0  | 1.0   |
| 21UR-125600 | 0.0     | 14.5  | 1.0    | 0.0    | 5.0   | 2.0   |
| 21UR-125610 | 0.0     | 0.0   | 0.0    | 0.0    | 0.0   | 0.0   |
| 21UR-125620 | 0.0     | 0.0   | 0.0    | 0.0    | 0.0   | 0.0   |
| 21UR-125630 | 0.0     | 0.0   | 0.0    | 0.0    | 0.0   | 0.0   |
| 21UR-125640 | 0.0     | 0.0   | 0.0    | 0.0    | 0.0   | 0.0   |
| 21UR-125650 | 0.0     | 1.0   | 0.0    | 0.0    | 0.0   | 0.0   |
| 21UR-125660 | 0.0     | 0.0   | 0.0    | 0.0    | 0.0   | 0.0   |
| 21UR-125670 | 0.0     | 0.0   | 0.0    | 0.0    | 0.0   | 0.0   |
| 21UR-125690 | 0.0     | 0.0   | 0.0    | 0.0    | 0.0   | 0.0   |
| 21UR-12570  | 8.0     | 4.2   | 10.0   | 4.0    | 9.0   | 2.0   |
| 21UR-125710 | 0.0     | 0.0   | 0.0    | 1.0    | 1.0   | 0.0   |
| 21UR-125720 | 0.0     | 0.2   | 0.0    | 0.0    | 0.0   | 0.0   |
| 21UR-125740 | 2.0     | 0.0   | 0.0    | 0.0    | 0.0   | 0.0   |
| 21UR-125750 | 0.0     | 0.0   | 0.0    | 0.0    | 0.0   | 0.0   |
| 21UR-125760 | 0.0     | 0.0   | 4.0    | 0.0    | 1.0   | 0.0   |
| 21UR-125770 | 0.0     | 0.0   | 0.0    | 0.0    | 0.0   | 0.0   |
| 21UR-125780 | 0.0     | 0.1   | 0.0    | 0.0    | 0.0   | 0.0   |
| 21UR-125790 | 6.0     | 9.0   | 4.0    | 2.0    | 6.0   | 3.0   |
| 21UR-12580  | 10024.0 | 309.0 | 5863.5 | 1259.0 | 212.7 | 100.0 |
| 21UR-125800 | 0.0     | 0.0   | 1.0    | 0.0    | 0.0   | 0.0   |
| 21UR-125810 | 1.0     | 1.0   | 0.0    | 0.0    | 2.0   | 0.0   |
| 21UR-125830 | 1.0     | 1.2   | 0.0    | 0.0    | 0.0   | 0.5   |

|             |       |       |       |       |       |      |
|-------------|-------|-------|-------|-------|-------|------|
| 21UR-125840 | 1.0   | 1.2   | 0.0   | 0.0   | 0.0   | 0.5  |
| 21UR-125850 | 18.0  | 0.0   | 24.0  | 8.0   | 3.0   | 0.0  |
| 21UR-125860 | 0.0   | 0.0   | 0.0   | 0.0   | 0.0   | 0.0  |
| 21UR-125870 | 0.0   | 1.0   | 0.0   | 0.0   | 0.0   | 0.0  |
| 21UR-125880 | 1.0   | 1.0   | 3.0   | 0.0   | 0.0   | 0.0  |
| 21UR-125890 | 0.0   | 0.0   | 0.0   | 0.0   | 0.0   | 0.0  |
| 21UR-12590  | 1.0   | 1.0   | 0.0   | 0.0   | 5.0   | 0.0  |
| 21UR-125900 | 0.0   | 0.0   | 0.0   | 0.0   | 0.0   | 0.0  |
| 21UR-125920 | 0.0   | 0.0   | 0.0   | 0.0   | 0.0   | 0.0  |
| 21UR-125930 | 0.0   | 0.0   | 0.0   | 0.0   | 0.0   | 0.0  |
| 21UR-125950 | 0.0   | 0.0   | 0.0   | 0.0   | 0.0   | 0.0  |
| 21UR-125960 | 0.0   | 0.0   | 0.0   | 0.0   | 0.0   | 0.0  |
| 21UR-125970 | 0.0   | 0.0   | 0.0   | 0.0   | 0.0   | 0.0  |
| 21UR-125980 | 0.0   | 1.0   | 0.0   | 0.0   | 0.0   | 0.0  |
| 21UR-125990 | 0.0   | 0.0   | 0.0   | 0.0   | 0.0   | 0.0  |
| 21UR-1260   | 1.0   | 0.0   | 0.0   | 0.0   | 0.0   | 0.0  |
| 21UR-12600  | 0.0   | 0.0   | 0.0   | 0.0   | 4.0   | 0.0  |
| 21UR-126000 | 0.0   | 0.0   | 0.0   | 0.0   | 0.0   | 0.0  |
| 21UR-126010 | 0.0   | 0.0   | 2.0   | 1.0   | 1.0   | 0.0  |
| 21UR-126020 | 0.0   | 0.0   | 0.0   | 0.0   | 0.0   | 0.0  |
| 21UR-126030 | 0.0   | 0.0   | 0.0   | 0.0   | 0.0   | 0.0  |
| 21UR-126040 | 40.0  | 2.0   | 34.0  | 5.0   | 9.0   | 0.0  |
| 21UR-126050 | 0.0   | 0.0   | 0.0   | 0.0   | 0.0   | 0.0  |
| 21UR-126060 | 0.0   | 0.0   | 0.0   | 0.0   | 0.0   | 0.0  |
| 21UR-126070 | 0.0   | 0.0   | 0.0   | 0.0   | 0.0   | 0.0  |
| 21UR-126080 | 45.0  | 28.6  | 69.0  | 9.5   | 41.5  | 9.0  |
| 21UR-126090 | 0.0   | 0.0   | 0.0   | 0.0   | 0.0   | 0.0  |
| 21UR-12610  | 14.0  | 0.0   | 14.0  | 2.0   | 0.0   | 0.0  |
| 21UR-126100 | 0.0   | 0.0   | 0.0   | 0.0   | 0.0   | 0.0  |
| 21UR-126110 | 2.0   | 1.0   | 1.0   | 0.0   | 0.0   | 0.0  |
| 21UR-126120 | 0.0   | 0.0   | 0.0   | 0.0   | 0.0   | 0.0  |
| 21UR-126130 | 525.0 | 326.0 | 587.0 | 238.0 | 330.0 | 21.0 |
| 21UR-126140 | 0.0   | 0.0   | 0.0   | 0.0   | 0.0   | 1.1  |
| 21UR-126150 | 8.0   | 1.0   | 6.0   | 1.0   | 2.0   | 0.0  |
| 21UR-126160 | 0.0   | 0.0   | 0.0   | 0.0   | 1.0   | 0.0  |
| 21UR-126170 | 0.0   | 0.0   | 0.0   | 0.0   | 0.0   | 0.0  |
| 21UR-126180 | 0.0   | 0.0   | 0.0   | 0.0   | 0.0   | 0.0  |
| 21UR-126190 | 0.0   | 0.0   | 2.0   | 0.0   | 0.0   | 0.0  |
| 21UR-12620  | 0.0   | 0.0   | 1.0   | 0.0   | 0.0   | 0.0  |
| 21UR-126200 | 0.0   | 0.0   | 0.0   | 0.0   | 1.0   | 1.0  |
| 21UR-126210 | 3.0   | 4.0   | 3.0   | 4.0   | 2.0   | 0.0  |
| 21UR-126220 | 0.0   | 0.0   | 0.0   | 0.0   | 0.0   | 0.0  |
| 21UR-126230 | 1.0   | 0.0   | 0.0   | 0.0   | 1.0   | 0.0  |
| 21UR-126240 | 0.0   | 0.0   | 0.0   | 0.0   | 0.0   | 0.0  |
| 21UR-126250 | 0.0   | 0.0   | 1.0   | 0.0   | 0.0   | 0.0  |
| 21UR-126260 | 0.0   | 0.0   | 0.0   | 0.0   | 0.0   | 0.0  |
| 21UR-126270 | 0.0   | 0.0   | 0.0   | 0.0   | 0.0   | 0.0  |
| 21UR-126280 | 0.0   | 0.0   | 0.0   | 0.0   | 0.0   | 0.0  |
| 21UR-126290 | 54.0  | 13.0  | 63.0  | 29.0  | 57.0  | 2.0  |
| 21UR-12630  | 0.0   | 0.0   | 0.0   | 0.0   | 1.0   | 0.0  |
| 21UR-126300 | 3.0   | 1.0   | 0.0   | 1.0   | 0.0   | 0.0  |

|             |      |     |      |      |      |     |
|-------------|------|-----|------|------|------|-----|
| 21UR-126310 | 16.0 | 7.0 | 5.0  | 2.0  | 4.0  | 0.0 |
| 21UR-126320 | 0.0  | 0.0 | 0.0  | 0.0  | 0.0  | 0.0 |
| 21UR-126330 | 0.0  | 0.0 | 0.0  | 0.0  | 0.0  | 0.0 |
| 21UR-126340 | 0.0  | 0.0 | 0.0  | 0.0  | 0.0  | 0.0 |
| 21UR-126350 | 0.0  | 0.0 | 0.0  | 1.0  | 0.0  | 0.0 |
| 21UR-126360 | 1.0  | 0.0 | 1.0  | 0.0  | 0.0  | 2.0 |
| 21UR-126370 | 0.0  | 0.0 | 0.0  | 0.0  | 0.0  | 0.0 |
| 21UR-126380 | 0.0  | 0.0 | 0.0  | 0.0  | 0.0  | 0.0 |
| 21UR-126390 | 0.0  | 0.0 | 0.0  | 0.0  | 0.0  | 0.0 |
| 21UR-12640  | 0.0  | 0.0 | 0.0  | 0.0  | 2.0  | 0.0 |
| 21UR-126400 | 0.0  | 0.0 | 0.0  | 0.0  | 0.0  | 0.0 |
| 21UR-126410 | 0.0  | 0.0 | 0.0  | 0.0  | 0.0  | 0.0 |
| 21UR-126420 | 0.0  | 0.0 | 0.0  | 0.0  | 0.0  | 0.0 |
| 21UR-126430 | 0.0  | 0.0 | 0.0  | 0.0  | 0.0  | 0.0 |
| 21UR-126450 | 0.0  | 0.0 | 0.0  | 0.0  | 0.0  | 0.0 |
| 21UR-126460 | 1.0  | 0.0 | 0.0  | 0.0  | 0.0  | 0.0 |
| 21UR-126470 | 0.0  | 0.0 | 0.0  | 0.0  | 0.0  | 0.0 |
| 21UR-126480 | 0.0  | 0.0 | 0.0  | 0.0  | 0.0  | 0.0 |
| 21UR-126490 | 3.0  | 3.0 | 4.0  | 0.0  | 2.0  | 0.0 |
| 21UR-126500 | 0.0  | 1.0 | 4.0  | 1.0  | 0.0  | 0.0 |
| 21UR-126510 | 0.0  | 0.0 | 0.0  | 0.0  | 1.0  | 0.0 |
| 21UR-126530 | 0.0  | 0.0 | 0.0  | 0.0  | 0.0  | 0.0 |
| 21UR-126540 | 0.0  | 0.0 | 0.0  | 0.0  | 0.0  | 0.0 |
| 21UR-126550 | 0.0  | 0.0 | 0.0  | 0.0  | 1.0  | 0.0 |
| 21UR-126560 | 0.0  | 2.0 | 0.0  | 0.0  | 1.0  | 0.0 |
| 21UR-126570 | 0.0  | 0.0 | 0.0  | 0.0  | 0.0  | 0.0 |
| 21UR-126580 | 0.0  | 1.0 | 0.0  | 0.0  | 0.0  | 0.0 |
| 21UR-126590 | 5.0  | 4.0 | 7.0  | 2.0  | 13.0 | 0.0 |
| 21UR-12660  | 0.0  | 0.0 | 0.0  | 0.0  | 0.0  | 0.0 |
| 21UR-126600 | 0.0  | 1.0 | 0.0  | 0.0  | 0.0  | 0.0 |
| 21UR-126610 | 0.0  | 0.0 | 0.0  | 0.0  | 0.0  | 0.0 |
| 21UR-126620 | 0.0  | 0.0 | 0.0  | 0.0  | 0.0  | 0.0 |
| 21UR-126630 | 0.0  | 0.0 | 0.0  | 0.0  | 0.0  | 0.0 |
| 21UR-126640 | 0.0  | 0.0 | 0.0  | 0.0  | 0.0  | 0.0 |
| 21UR-126650 | 0.0  | 0.0 | 0.0  | 0.0  | 0.0  | 0.0 |
| 21UR-126660 | 0.0  | 0.0 | 0.0  | 0.0  | 0.0  | 0.0 |
| 21UR-126670 | 0.0  | 0.0 | 0.0  | 0.0  | 0.0  | 0.0 |
| 21UR-126680 | 0.0  | 0.0 | 0.0  | 0.0  | 0.0  | 0.0 |
| 21UR-126690 | 2.5  | 5.0 | 5.0  | 0.0  | 4.0  | 1.0 |
| 21UR-12670  | 49.0 | 6.0 | 28.0 | 13.0 | 2.0  | 0.0 |
| 21UR-126700 | 0.0  | 0.0 | 0.0  | 0.0  | 0.0  | 0.0 |
| 21UR-126710 | 0.0  | 0.0 | 0.0  | 0.0  | 0.0  | 0.0 |
| 21UR-126720 | 0.0  | 0.0 | 0.0  | 0.0  | 0.0  | 0.0 |
| 21UR-126730 | 2.0  | 0.0 | 0.0  | 0.0  | 0.0  | 0.0 |
| 21UR-126740 | 0.0  | 0.0 | 0.0  | 0.0  | 0.0  | 0.0 |
| 21UR-126750 | 0.0  | 0.0 | 0.0  | 0.0  | 0.0  | 0.0 |
| 21UR-126760 | 0.0  | 4.0 | 0.0  | 0.0  | 3.0  | 0.0 |
| 21UR-126770 | 0.0  | 1.0 | 0.0  | 0.0  | 2.0  | 0.0 |
| 21UR-126780 | 14.0 | 0.0 | 0.0  | 1.0  | 1.0  | 0.0 |
| 21UR-126790 | 0.0  | 0.0 | 1.0  | 0.0  | 0.0  | 0.0 |
| 21UR-12680  | 0.0  | 1.0 | 0.0  | 0.0  | 2.0  | 0.0 |

|             |      |      |      |     |      |     |
|-------------|------|------|------|-----|------|-----|
| 21UR-126800 | 0.0  | 0.0  | 0.0  | 0.0 | 0.0  | 0.0 |
| 21UR-126810 | 0.0  | 1.0  | 0.0  | 0.0 | 0.0  | 0.0 |
| 21UR-126820 | 0.0  | 0.0  | 0.0  | 0.0 | 0.0  | 0.0 |
| 21UR-126830 | 0.0  | 0.0  | 0.0  | 0.0 | 0.0  | 0.0 |
| 21UR-126840 | 0.0  | 0.0  | 0.0  | 0.0 | 0.0  | 0.0 |
| 21UR-126850 | 0.0  | 0.0  | 0.0  | 0.0 | 0.0  | 0.0 |
| 21UR-126860 | 0.0  | 0.0  | 0.0  | 0.0 | 0.0  | 0.0 |
| 21UR-126870 | 0.0  | 0.0  | 1.0  | 0.0 | 1.0  | 0.0 |
| 21UR-126880 | 0.0  | 0.0  | 0.0  | 0.0 | 0.0  | 0.0 |
| 21UR-126890 | 0.0  | 0.0  | 0.0  | 0.0 | 0.0  | 0.0 |
| 21UR-12690  | 36.0 | 43.0 | 19.0 | 8.0 | 97.5 | 3.0 |
| 21UR-126900 | 3.0  | 3.0  | 4.0  | 1.0 | 2.0  | 3.0 |
| 21UR-126910 | 6.0  | 1.0  | 0.0  | 1.0 | 0.0  | 0.0 |
| 21UR-126920 | 1.0  | 0.0  | 0.0  | 0.0 | 0.0  | 0.0 |
| 21UR-126930 | 5.0  | 0.0  | 2.0  | 0.0 | 0.0  | 0.0 |
| 21UR-126940 | 15.0 | 1.5  | 20.0 | 1.0 | 1.0  | 1.0 |
| 21UR-126950 | 0.0  | 0.0  | 0.0  | 0.0 | 2.0  | 0.0 |
| 21UR-126960 | 0.0  | 0.0  | 0.0  | 0.0 | 0.0  | 0.0 |
| 21UR-126970 | 5.0  | 9.0  | 7.0  | 2.0 | 17.0 | 1.0 |
| 21UR-126980 | 0.0  | 0.0  | 0.0  | 0.0 | 0.0  | 0.0 |
| 21UR-126990 | 9.0  | 9.0  | 11.0 | 6.0 | 16.2 | 3.0 |
| 21UR-1270   | 0.0  | 0.0  | 0.0  | 0.0 | 0.0  | 0.0 |
| 21UR-12700  | 0.0  | 0.0  | 0.0  | 0.0 | 0.0  | 0.0 |
| 21UR-127000 | 1.0  | 1.0  | 1.0  | 0.0 | 0.0  | 1.0 |
| 21UR-127010 | 0.0  | 0.0  | 0.0  | 0.0 | 0.0  | 0.0 |
| 21UR-127020 | 0.0  | 0.0  | 0.0  | 0.0 | 0.0  | 0.0 |
| 21UR-127030 | 0.0  | 0.0  | 0.0  | 0.0 | 0.0  | 0.0 |
| 21UR-127040 | 0.0  | 0.0  | 0.0  | 0.0 | 0.0  | 0.0 |
| 21UR-127050 | 0.0  | 0.0  | 0.0  | 0.0 | 0.0  | 0.0 |
| 21UR-127060 | 3.0  | 1.0  | 9.0  | 0.0 | 1.0  | 1.0 |
| 21UR-127070 | 1.0  | 0.0  | 4.0  | 0.0 | 0.0  | 0.0 |
| 21UR-127080 | 0.0  | 0.0  | 0.0  | 0.0 | 0.0  | 0.0 |
| 21UR-127090 | 0.0  | 0.0  | 0.0  | 0.0 | 0.0  | 0.0 |
| 21UR-12710  | 4.0  | 1.0  | 8.0  | 6.0 | 2.0  | 0.0 |
| 21UR-127100 | 0.0  | 0.0  | 0.0  | 0.0 | 0.0  | 0.0 |
| 21UR-127110 | 0.0  | 0.0  | 1.0  | 1.0 | 0.0  | 0.0 |
| 21UR-127120 | 0.0  | 0.0  | 0.0  | 0.0 | 0.0  | 0.0 |
| 21UR-127130 | 0.0  | 0.0  | 0.0  | 0.0 | 0.0  | 0.0 |
| 21UR-127140 | 0.0  | 0.0  | 0.0  | 0.0 | 0.0  | 0.0 |
| 21UR-127150 | 0.0  | 0.0  | 0.0  | 0.0 | 0.0  | 0.0 |
| 21UR-127160 | 12.0 | 22.1 | 10.0 | 6.0 | 25.0 | 2.0 |
| 21UR-127170 | 0.0  | 0.0  | 0.0  | 0.0 | 0.0  | 0.0 |
| 21UR-127180 | 0.0  | 0.0  | 0.0  | 0.0 | 0.0  | 0.0 |
| 21UR-127190 | 0.0  | 0.0  | 0.0  | 0.0 | 0.0  | 0.0 |
| 21UR-12720  | 0.0  | 1.0  | 6.0  | 0.0 | 0.0  | 0.0 |
| 21UR-127210 | 0.0  | 0.0  | 0.0  | 0.0 | 0.0  | 0.0 |
| 21UR-127220 | 0.0  | 0.0  | 0.0  | 0.0 | 0.0  | 0.0 |
| 21UR-127230 | 0.0  | 0.0  | 0.0  | 0.0 | 0.0  | 0.0 |
| 21UR-127240 | 0.0  | 0.0  | 0.0  | 0.0 | 0.0  | 0.0 |
| 21UR-127250 | 0.0  | 0.2  | 0.0  | 0.0 | 0.2  | 0.3 |
| 21UR-127260 | 4.0  | 0.0  | 3.0  | 0.0 | 0.0  | 1.0 |

|             |       |       |       |       |       |      |
|-------------|-------|-------|-------|-------|-------|------|
| 21UR-127270 | 20.0  | 1.0   | 17.0  | 4.0   | 2.0   | 0.0  |
| 21UR-127280 | 0.0   | 0.0   | 0.0   | 0.0   | 0.0   | 0.0  |
| 21UR-127290 | 0.0   | 0.0   | 0.0   | 0.0   | 0.0   | 0.0  |
| 21UR-12730  | 31.0  | 22.0  | 29.0  | 6.0   | 37.0  | 0.0  |
| 21UR-127300 | 0.0   | 0.0   | 0.0   | 0.0   | 0.0   | 0.0  |
| 21UR-127320 | 0.0   | 0.0   | 0.0   | 0.0   | 0.0   | 0.0  |
| 21UR-127330 | 0.0   | 0.0   | 0.0   | 1.0   | 8.0   | 0.0  |
| 21UR-127340 | 3.0   | 1.0   | 0.0   | 1.0   | 0.0   | 0.0  |
| 21UR-127350 | 0.0   | 0.0   | 0.0   | 0.0   | 0.0   | 0.0  |
| 21UR-127370 | 0.0   | 2.0   | 2.0   | 0.0   | 0.0   | 0.0  |
| 21UR-127380 | 2.0   | 0.0   | 1.0   | 0.0   | 1.0   | 0.0  |
| 21UR-127390 | 4.0   | 1.0   | 3.0   | 1.0   | 1.0   | 0.0  |
| 21UR-12740  | 0.0   | 1.0   | 2.0   | 1.0   | 2.0   | 0.0  |
| 21UR-127400 | 0.0   | 0.0   | 0.0   | 0.0   | 1.0   | 0.0  |
| 21UR-127410 | 0.0   | 0.0   | 0.0   | 0.0   | 0.0   | 0.0  |
| 21UR-127420 | 0.0   | 0.3   | 0.0   | 0.0   | 0.0   | 0.0  |
| 21UR-127430 | 648.5 | 149.0 | 628.0 | 398.0 | 322.5 | 16.0 |
| 21UR-127440 | 0.0   | 0.0   | 0.0   | 0.0   | 0.0   | 0.0  |
| 21UR-127450 | 0.0   | 0.0   | 0.0   | 0.0   | 0.0   | 0.0  |
| 21UR-127460 | 0.0   | 1.0   | 0.0   | 0.0   | 0.0   | 0.0  |
| 21UR-127470 | 0.0   | 0.0   | 0.0   | 0.0   | 0.0   | 0.0  |
| 21UR-127480 | 8.0   | 9.0   | 5.0   | 2.0   | 2.0   | 0.0  |
| 21UR-127490 | 27.0  | 8.0   | 18.0  | 6.0   | 13.0  | 2.0  |
| 21UR-12750  | 3.0   | 0.0   | 1.0   | 0.0   | 3.2   | 0.0  |
| 21UR-127500 | 0.0   | 0.0   | 0.0   | 0.0   | 0.0   | 0.0  |
| 21UR-127510 | 0.0   | 0.0   | 0.0   | 0.0   | 0.0   | 0.0  |
| 21UR-127520 | 0.0   | 0.0   | 0.0   | 0.0   | 0.0   | 0.0  |
| 21UR-127530 | 0.0   | 0.0   | 0.0   | 0.0   | 0.0   | 0.0  |
| 21UR-127540 | 0.0   | 1.0   | 0.0   | 0.0   | 0.0   | 0.0  |
| 21UR-127550 | 0.0   | 0.0   | 0.0   | 0.0   | 0.0   | 0.0  |
| 21UR-127560 | 0.0   | 1.0   | 0.0   | 0.0   | 0.0   | 0.0  |
| 21UR-127570 | 0.0   | 0.0   | 0.0   | 0.0   | 0.0   | 0.0  |
| 21UR-127580 | 0.0   | 0.1   | 0.0   | 1.0   | 1.0   | 0.0  |
| 21UR-127590 | 4.0   | 8.0   | 7.0   | 0.0   | 5.0   | 1.0  |
| 21UR-12760  | 0.0   | 0.0   | 0.0   | 0.0   | 0.0   | 0.0  |
| 21UR-127600 | 235.5 | 161.7 | 242.2 | 82.0  | 170.0 | 16.0 |
| 21UR-127610 | 16.0  | 5.0   | 17.0  | 2.0   | 7.0   | 1.0  |
| 21UR-127620 | 0.0   | 1.0   | 0.0   | 0.0   | 0.0   | 0.0  |
| 21UR-127630 | 0.0   | 0.0   | 0.0   | 0.0   | 0.0   | 0.0  |
| 21UR-127640 | 1.0   | 0.0   | 0.0   | 6.0   | 0.0   | 0.0  |
| 21UR-127650 | 0.0   | 0.0   | 0.0   | 0.0   | 0.0   | 0.0  |
| 21UR-127660 | 6.5   | 0.0   | 1.0   | 1.0   | 0.0   | 1.0  |
| 21UR-127670 | 0.0   | 0.0   | 0.0   | 0.0   | 0.0   | 0.0  |
| 21UR-127680 | 0.0   | 0.0   | 0.0   | 0.0   | 0.0   | 1.0  |
| 21UR-127690 | 0.0   | 0.0   | 0.0   | 0.0   | 0.0   | 0.0  |
| 21UR-12770  | 6.0   | 0.0   | 1.0   | 1.0   | 0.0   | 0.0  |
| 21UR-127700 | 0.0   | 0.0   | 0.0   | 0.0   | 0.0   | 0.0  |
| 21UR-127710 | 0.0   | 1.0   | 3.0   | 1.0   | 0.0   | 1.0  |
| 21UR-127720 | 0.0   | 0.0   | 0.0   | 0.0   | 0.0   | 0.0  |
| 21UR-127730 | 0.0   | 0.0   | 0.0   | 0.0   | 0.0   | 0.0  |
| 21UR-127740 | 0.0   | 0.0   | 1.0   | 0.0   | 0.0   | 0.0  |

|             |       |      |       |       |       |     |
|-------------|-------|------|-------|-------|-------|-----|
| 21UR-127750 | 0.0   | 0.0  | 1.0   | 0.0   | 0.0   | 0.0 |
| 21UR-127760 | 0.0   | 0.0  | 0.0   | 0.0   | 0.0   | 0.0 |
| 21UR-127770 | 23.0  | 52.5 | 40.0  | 8.0   | 87.0  | 4.0 |
| 21UR-127780 | 0.0   | 4.0  | 3.0   | 0.0   | 0.0   | 0.0 |
| 21UR-12780  | 1.0   | 0.0  | 1.0   | 0.0   | 4.0   | 0.0 |
| 21UR-127800 | 1.0   | 0.0  | 0.0   | 0.0   | 0.0   | 0.0 |
| 21UR-127810 | 0.0   | 0.0  | 0.0   | 0.0   | 0.0   | 0.0 |
| 21UR-127820 | 0.0   | 0.0  | 0.0   | 0.0   | 0.0   | 0.0 |
| 21UR-127830 | 2.0   | 13.0 | 2.0   | 0.0   | 2.0   | 0.0 |
| 21UR-127840 | 37.0  | 13.0 | 21.0  | 12.0  | 42.0  | 3.0 |
| 21UR-127850 | 0.0   | 0.0  | 0.0   | 0.0   | 1.0   | 0.0 |
| 21UR-127860 | 0.0   | 0.0  | 0.0   | 0.0   | 0.0   | 0.0 |
| 21UR-127870 | 0.0   | 0.0  | 0.0   | 0.0   | 0.0   | 0.0 |
| 21UR-127880 | 0.0   | 0.0  | 1.0   | 0.0   | 0.0   | 0.0 |
| 21UR-127890 | 0.0   | 0.0  | 0.0   | 0.0   | 0.0   | 0.0 |
| 21UR-12790  | 0.0   | 2.0  | 0.0   | 0.0   | 0.0   | 0.0 |
| 21UR-127900 | 1.0   | 1.0  | 1.0   | 0.0   | 0.0   | 0.0 |
| 21UR-127910 | 0.0   | 0.0  | 0.0   | 0.0   | 0.0   | 0.0 |
| 21UR-127920 | 0.0   | 0.0  | 0.0   | 0.0   | 0.0   | 0.0 |
| 21UR-127930 | 0.0   | 0.0  | 1.0   | 0.0   | 0.0   | 0.0 |
| 21UR-127940 | 0.0   | 0.0  | 0.0   | 0.0   | 0.0   | 0.0 |
| 21UR-127950 | 0.0   | 0.0  | 0.0   | 0.0   | 0.0   | 0.0 |
| 21UR-127960 | 0.0   | 0.0  | 0.0   | 0.0   | 0.0   | 0.0 |
| 21UR-127970 | 8.0   | 4.0  | 7.0   | 3.0   | 4.0   | 0.0 |
| 21UR-127980 | 0.0   | 0.0  | 0.0   | 9.0   | 2.0   | 0.0 |
| 21UR-127990 | 1.0   | 0.0  | 2.0   | 0.0   | 1.0   | 0.0 |
| 21UR-1280   | 0.0   | 0.0  | 0.0   | 0.0   | 0.0   | 0.0 |
| 21UR-12800  | 1.0   | 25.0 | 1.0   | 0.0   | 0.0   | 2.0 |
| 21UR-128000 | 0.0   | 0.0  | 0.0   | 0.0   | 0.0   | 0.0 |
| 21UR-128010 | 1.0   | 0.0  | 0.0   | 0.0   | 0.0   | 0.0 |
| 21UR-128020 | 0.0   | 0.0  | 0.0   | 0.0   | 0.0   | 0.0 |
| 21UR-128030 | 0.0   | 0.0  | 0.0   | 0.0   | 0.0   | 0.0 |
| 21UR-128040 | 0.0   | 0.0  | 0.0   | 0.0   | 0.0   | 0.0 |
| 21UR-128050 | 0.0   | 0.0  | 0.0   | 0.0   | 0.0   | 0.0 |
| 21UR-128060 | 0.0   | 1.0  | 2.0   | 1.0   | 1.0   | 1.0 |
| 21UR-128070 | 0.0   | 0.0  | 0.0   | 0.0   | 0.0   | 0.0 |
| 21UR-128080 | 3.0   | 0.0  | 5.0   | 1.0   | 0.0   | 0.0 |
| 21UR-128090 | 0.0   | 0.0  | 1.0   | 0.0   | 0.0   | 0.0 |
| 21UR-12810  | 1.0   | 0.0  | 4.0   | 0.0   | 0.0   | 0.0 |
| 21UR-128100 | 0.0   | 0.0  | 0.0   | 0.0   | 0.0   | 0.0 |
| 21UR-128110 | 0.0   | 0.0  | 1.0   | 0.0   | 0.0   | 0.0 |
| 21UR-128120 | 0.0   | 0.0  | 0.0   | 0.0   | 0.0   | 0.0 |
| 21UR-128130 | 1.0   | 0.0  | 1.0   | 0.0   | 1.0   | 0.0 |
| 21UR-128140 | 1.0   | 1.0  | 1.0   | 0.0   | 0.0   | 0.0 |
| 21UR-128150 | 0.0   | 0.0  | 0.0   | 0.0   | 0.0   | 0.0 |
| 21UR-128160 | 1.0   | 0.0  | 1.0   | 0.0   | 0.0   | 0.0 |
| 21UR-128170 | 1.0   | 0.0  | 4.0   | 1.0   | 1.0   | 0.0 |
| 21UR-128180 | 6.0   | 3.0  | 2.0   | 3.0   | 5.0   | 0.0 |
| 21UR-128190 | 44.0  | 18.0 | 45.0  | 5.0   | 17.0  | 4.0 |
| 21UR-128200 | 316.5 | 47.0 | 214.5 | 171.0 | 104.0 | 3.0 |
| 21UR-128210 | 0.0   | 0.0  | 0.0   | 0.0   | 0.0   | 0.0 |



|             |       |      |       |       |      |      |
|-------------|-------|------|-------|-------|------|------|
| 21UR-128220 | 14.0  | 11.0 | 10.0  | 2.0   | 5.0  | 7.0  |
| 21UR-128230 | 0.0   | 0.0  | 0.0   | 0.0   | 0.0  | 0.0  |
| 21UR-128240 | 1.0   | 4.0  | 2.0   | 0.0   | 1.5  | 0.0  |
| 21UR-128250 | 0.0   | 0.0  | 0.0   | 0.0   | 0.0  | 0.0  |
| 21UR-128260 | 1.0   | 0.0  | 0.0   | 0.0   | 1.0  | 1.0  |
| 21UR-128270 | 44.0  | 5.0  | 31.0  | 7.0   | 25.0 | 0.0  |
| 21UR-128280 | 0.0   | 0.0  | 0.0   | 0.0   | 0.0  | 0.0  |
| 21UR-128290 | 0.0   | 0.0  | 0.0   | 0.0   | 0.0  | 0.0  |
| 21UR-12830  | 0.0   | 0.0  | 0.0   | 0.0   | 0.1  | 0.0  |
| 21UR-128300 | 0.0   | 0.0  | 0.0   | 0.0   | 0.0  | 0.0  |
| 21UR-128310 | 0.0   | 0.0  | 0.0   | 0.0   | 0.0  | 0.0  |
| 21UR-128320 | 0.0   | 0.0  | 0.0   | 0.0   | 0.0  | 0.0  |
| 21UR-128330 | 2.0   | 0.0  | 1.0   | 1.0   | 1.0  | 1.0  |
| 21UR-128340 | 0.0   | 0.0  | 0.0   | 0.0   | 0.0  | 0.0  |
| 21UR-128350 | 0.0   | 0.0  | 0.0   | 0.0   | 0.0  | 0.0  |
| 21UR-128360 | 0.0   | 0.0  | 0.0   | 0.0   | 1.0  | 1.0  |
| 21UR-128370 | 0.0   | 0.0  | 0.0   | 0.0   | 0.0  | 0.0  |
| 21UR-128380 | 7.0   | 3.0  | 7.0   | 1.0   | 1.0  | 1.0  |
| 21UR-128390 | 45.0  | 14.0 | 45.0  | 15.0  | 23.0 | 2.0  |
| 21UR-12840  | 0.0   | 0.0  | 0.0   | 0.0   | 0.0  | 0.0  |
| 21UR-128400 | 2.0   | 0.0  | 0.0   | 0.0   | 0.0  | 0.0  |
| 21UR-128410 | 0.0   | 2.0  | 1.0   | 0.0   | 0.0  | 0.0  |
| 21UR-128420 | 0.0   | 5.0  | 1.0   | 2.0   | 2.0  | 0.0  |
| 21UR-128430 | 0.0   | 0.0  | 0.0   | 0.0   | 0.0  | 0.0  |
| 21UR-128440 | 0.0   | 0.0  | 0.0   | 0.0   | 1.0  | 0.0  |
| 21UR-128450 | 19.0  | 0.2  | 19.0  | 4.0   | 0.0  | 1.2  |
| 21UR-128460 | 1.0   | 24.0 | 0.0   | 0.0   | 1.0  | 1.0  |
| 21UR-128470 | 7.0   | 0.0  | 10.0  | 2.0   | 1.0  | 0.0  |
| 21UR-128480 | 76.0  | 72.3 | 64.0  | 43.0  | 65.0 | 8.0  |
| 21UR-128490 | 4.0   | 3.0  | 5.0   | 2.0   | 2.0  | 1.0  |
| 21UR-12850  | 858.0 | 75.3 | 527.0 | 236.0 | 97.0 | 18.0 |
| 21UR-128500 | 0.0   | 0.0  | 0.0   | 0.0   | 0.0  | 0.0  |
| 21UR-128510 | 0.0   | 0.0  | 0.0   | 0.0   | 1.0  | 1.0  |
| 21UR-128520 | 1.0   | 0.0  | 1.0   | 1.0   | 1.0  | 0.0  |
| 21UR-128530 | 10.0  | 3.0  | 10.5  | 3.0   | 0.0  | 0.0  |
| 21UR-128540 | 50.0  | 8.0  | 33.0  | 18.0  | 10.0 | 3.0  |
| 21UR-128550 | 0.0   | 0.0  | 0.0   | 0.0   | 0.0  | 0.0  |
| 21UR-128560 | 1.0   | 0.0  | 0.0   | 0.0   | 0.0  | 0.0  |
| 21UR-128570 | 0.0   | 0.0  | 0.0   | 0.0   | 0.0  | 0.0  |
| 21UR-128580 | 0.0   | 0.0  | 0.0   | 0.0   | 0.0  | 0.0  |
| 21UR-128590 | 0.0   | 0.0  | 0.0   | 0.0   | 0.0  | 0.0  |
| 21UR-12860  | 0.0   | 0.0  | 0.0   | 0.0   | 1.0  | 0.0  |
| 21UR-128600 | 7.0   | 1.0  | 9.0   | 3.0   | 1.0  | 0.0  |
| 21UR-128610 | 0.0   | 0.0  | 0.0   | 0.0   | 0.0  | 0.0  |
| 21UR-128620 | 1.0   | 0.0  | 0.0   | 0.0   | 1.0  | 0.0  |
| 21UR-128630 | 0.0   | 0.0  | 0.0   | 0.0   | 0.0  | 0.0  |
| 21UR-128640 | 0.0   | 0.0  | 0.0   | 0.0   | 0.0  | 0.0  |
| 21UR-128650 | 0.0   | 0.0  | 0.0   | 0.0   | 0.0  | 0.0  |
| 21UR-128660 | 0.0   | 0.0  | 0.0   | 0.0   | 0.0  | 0.0  |
| 21UR-128670 | 1.0   | 0.0  | 0.0   | 0.0   | 0.0  | 0.0  |
| 21UR-128680 | 0.0   | 0.0  | 0.0   | 0.0   | 0.0  | 0.0  |

|             |       |       |       |       |       |      |
|-------------|-------|-------|-------|-------|-------|------|
| 21UR-128690 | 1.0   | 2.0   | 1.0   | 1.0   | 0.0   | 0.0  |
| 21UR-12870  | 0.0   | 0.0   | 0.0   | 0.0   | 0.0   | 0.0  |
| 21UR-128700 | 0.0   | 0.0   | 0.0   | 0.0   | 1.0   | 0.0  |
| 21UR-128710 | 0.0   | 0.0   | 0.0   | 0.0   | 1.1   | 0.0  |
| 21UR-128720 | 0.0   | 0.0   | 0.0   | 0.0   | 0.0   | 0.0  |
| 21UR-128740 | 0.0   | 0.0   | 0.0   | 0.0   | 0.0   | 0.0  |
| 21UR-128750 | 7.0   | 1.0   | 2.0   | 0.0   | 2.0   | 0.0  |
| 21UR-128760 | 0.0   | 0.0   | 0.0   | 0.0   | 0.0   | 0.0  |
| 21UR-128770 | 0.0   | 0.0   | 0.0   | 0.0   | 0.0   | 0.0  |
| 21UR-128780 | 0.0   | 0.0   | 0.0   | 1.0   | 1.0   | 0.0  |
| 21UR-128790 | 0.0   | 0.0   | 0.0   | 0.0   | 0.0   | 0.0  |
| 21UR-12880  | 0.0   | 1.0   | 2.0   | 1.0   | 3.0   | 1.0  |
| 21UR-128800 | 0.0   | 0.0   | 0.0   | 0.0   | 0.0   | 0.0  |
| 21UR-128810 | 0.0   | 0.0   | 0.0   | 0.0   | 0.0   | 0.0  |
| 21UR-128820 | 8.0   | 5.0   | 5.0   | 2.0   | 6.0   | 1.0  |
| 21UR-128830 | 6.0   | 1.0   | 2.0   | 2.0   | 1.0   | 2.0  |
| 21UR-128840 | 1.0   | 1.0   | 0.0   | 0.0   | 1.0   | 1.0  |
| 21UR-128850 | 0.0   | 1.5   | 2.0   | 0.0   | 1.0   | 0.0  |
| 21UR-128860 | 256.8 | 30.0  | 308.2 | 130.3 | 186.7 | 0.0  |
| 21UR-128870 | 0.0   | 0.0   | 0.0   | 0.0   | 0.0   | 0.0  |
| 21UR-128880 | 8.0   | 9.0   | 15.0  | 4.0   | 8.0   | 1.0  |
| 21UR-128890 | 0.0   | 0.0   | 0.0   | 0.0   | 0.0   | 0.0  |
| 21UR-12890  | 0.0   | 0.0   | 0.0   | 0.0   | 0.0   | 0.0  |
| 21UR-128900 | 0.0   | 1.0   | 0.0   | 0.0   | 0.0   | 0.0  |
| 21UR-128910 | 2.0   | 2.0   | 0.0   | 0.0   | 1.0   | 0.0  |
| 21UR-128920 | 0.0   | 0.0   | 0.0   | 0.0   | 0.0   | 0.0  |
| 21UR-128930 | 8.0   | 0.0   | 6.0   | 1.0   | 4.0   | 0.0  |
| 21UR-128940 | 0.0   | 0.0   | 0.0   | 0.0   | 0.0   | 0.0  |
| 21UR-128950 | 626.8 | 285.0 | 581.5 | 162.5 | 330.6 | 61.5 |
| 21UR-128960 | 0.0   | 0.0   | 0.0   | 0.0   | 0.0   | 0.0  |
| 21UR-128970 | 0.0   | 0.0   | 0.0   | 0.0   | 0.0   | 0.0  |
| 21UR-128980 | 18.0  | 2.0   | 26.0  | 3.0   | 6.0   | 3.0  |
| 21UR-128990 | 0.0   | 0.0   | 0.0   | 0.0   | 0.0   | 0.0  |
| 21UR-1290   | 13.3  | 39.0  | 15.0  | 2.0   | 30.0  | 3.0  |
| 21UR-12900  | 59.0  | 19.0  | 28.0  | 15.0  | 21.0  | 8.0  |
| 21UR-129000 | 0.0   | 0.0   | 0.0   | 0.0   | 0.0   | 0.0  |
| 21UR-129010 | 0.0   | 0.0   | 0.0   | 0.0   | 0.0   | 0.0  |
| 21UR-129020 | 0.0   | 0.0   | 0.0   | 0.0   | 0.0   | 0.0  |
| 21UR-129030 | 6.0   | 0.0   | 6.0   | 2.0   | 10.0  | 0.0  |
| 21UR-129040 | 0.0   | 0.0   | 0.0   | 0.0   | 0.0   | 0.0  |
| 21UR-129050 | 7.0   | 15.2  | 5.0   | 3.0   | 52.0  | 4.0  |
| 21UR-129060 | 0.0   | 0.0   | 0.0   | 0.0   | 0.0   | 0.0  |
| 21UR-129070 | 0.0   | 0.0   | 0.0   | 0.0   | 0.0   | 0.0  |
| 21UR-129080 | 8.0   | 7.0   | 17.0  | 4.0   | 22.0  | 2.0  |
| 21UR-129090 | 0.0   | 0.0   | 0.0   | 0.0   | 0.0   | 0.0  |
| 21UR-12910  | 12.5  | 10.0  | 8.0   | 2.0   | 4.4   | 1.0  |
| 21UR-129100 | 1.0   | 0.0   | 0.0   | 0.0   | 1.0   | 0.0  |
| 21UR-129110 | 3.0   | 0.0   | 2.0   | 1.0   | 2.0   | 0.0  |
| 21UR-129120 | 0.0   | 0.0   | 0.0   | 0.0   | 0.0   | 0.0  |
| 21UR-129130 | 0.0   | 0.0   | 0.0   | 0.0   | 0.0   | 0.0  |
| 21UR-129140 | 1.0   | 2.0   | 0.0   | 0.0   | 2.0   | 1.0  |

|             |      |      |      |      |      |     |
|-------------|------|------|------|------|------|-----|
| 21UR-129150 | 1.0  | 8.0  | 2.0  | 0.0  | 4.0  | 0.0 |
| 21UR-129160 | 0.0  | 0.0  | 0.0  | 0.0  | 0.0  | 0.0 |
| 21UR-129170 | 0.0  | 0.0  | 0.0  | 0.0  | 0.0  | 0.0 |
| 21UR-129180 | 0.0  | 0.0  | 0.0  | 0.0  | 2.0  | 0.0 |
| 21UR-129190 | 0.0  | 1.0  | 0.0  | 0.0  | 0.0  | 0.0 |
| 21UR-12920  | 19.0 | 0.0  | 18.0 | 1.0  | 6.0  | 0.0 |
| 21UR-129200 | 0.0  | 0.0  | 0.0  | 0.0  | 0.0  | 0.0 |
| 21UR-129210 | 3.0  | 3.0  | 5.0  | 0.0  | 1.0  | 0.0 |
| 21UR-129220 | 0.0  | 0.0  | 0.0  | 0.0  | 0.0  | 0.0 |
| 21UR-129230 | 59.6 | 22.3 | 8.0  | 33.0 | 23.0 | 3.0 |
| 21UR-129240 | 0.0  | 0.0  | 0.0  | 0.0  | 0.0  | 0.0 |
| 21UR-129250 | 0.0  | 0.0  | 0.0  | 0.0  | 0.0  | 0.0 |
| 21UR-129260 | 0.0  | 0.0  | 0.0  | 0.0  | 0.0  | 0.0 |
| 21UR-129270 | 0.0  | 0.0  | 0.0  | 0.0  | 0.0  | 0.0 |
| 21UR-129280 | 0.0  | 0.0  | 0.0  | 0.0  | 0.0  | 0.0 |
| 21UR-129290 | 0.0  | 0.0  | 0.0  | 0.0  | 0.0  | 0.0 |
| 21UR-12930  | 1.0  | 1.0  | 0.0  | 0.0  | 0.0  | 0.0 |
| 21UR-129300 | 29.0 | 26.0 | 13.0 | 6.0  | 33.5 | 7.0 |
| 21UR-129310 | 1.0  | 5.0  | 5.0  | 1.0  | 4.0  | 0.0 |
| 21UR-129320 | 0.0  | 0.0  | 1.0  | 0.0  | 0.0  | 0.0 |
| 21UR-129340 | 0.0  | 0.0  | 1.0  | 0.0  | 0.0  | 0.0 |
| 21UR-129350 | 19.0 | 4.0  | 17.0 | 21.0 | 0.0  | 2.0 |
| 21UR-129360 | 0.0  | 0.0  | 0.0  | 0.0  | 0.0  | 0.0 |
| 21UR-129370 | 0.0  | 0.0  | 0.0  | 0.0  | 0.0  | 0.0 |
| 21UR-129380 | 0.0  | 7.0  | 0.0  | 0.0  | 1.0  | 0.0 |
| 21UR-129390 | 26.0 | 8.0  | 38.0 | 14.0 | 15.0 | 0.0 |
| 21UR-12940  | 11.0 | 3.0  | 5.0  | 0.0  | 6.0  | 4.0 |
| 21UR-129400 | 0.0  | 0.0  | 0.0  | 0.0  | 1.0  | 0.0 |
| 21UR-129410 | 0.0  | 0.0  | 0.0  | 0.0  | 0.0  | 0.0 |
| 21UR-129420 | 13.0 | 3.0  | 5.0  | 2.0  | 3.0  | 1.0 |
| 21UR-129430 | 0.0  | 0.0  | 0.0  | 0.0  | 0.0  | 0.0 |
| 21UR-129440 | 0.0  | 0.0  | 0.0  | 0.0  | 0.0  | 0.0 |
| 21UR-129450 | 0.0  | 0.0  | 0.0  | 0.0  | 0.0  | 0.0 |
| 21UR-129460 | 0.0  | 0.0  | 0.0  | 0.0  | 0.0  | 0.0 |
| 21UR-129470 | 0.0  | 2.0  | 1.0  | 0.0  | 1.0  | 1.0 |
| 21UR-129480 | 0.0  | 0.0  | 1.0  | 0.0  | 0.0  | 0.0 |
| 21UR-129490 | 0.0  | 0.0  | 0.0  | 0.0  | 0.0  | 0.0 |
| 21UR-12950  | 0.0  | 0.0  | 0.0  | 0.0  | 0.0  | 0.0 |
| 21UR-129500 | 0.0  | 0.0  | 0.0  | 0.0  | 0.0  | 0.0 |
| 21UR-129510 | 0.0  | 0.0  | 0.0  | 0.0  | 0.0  | 0.0 |
| 21UR-129520 | 0.0  | 0.0  | 0.0  | 0.0  | 0.0  | 0.0 |
| 21UR-129530 | 7.0  | 0.0  | 9.5  | 4.0  | 0.0  | 0.0 |
| 21UR-129540 | 6.0  | 1.0  | 7.0  | 1.0  | 5.0  | 2.0 |
| 21UR-129550 | 0.0  | 0.0  | 0.0  | 0.0  | 0.0  | 0.0 |
| 21UR-129560 | 0.0  | 0.0  | 0.0  | 0.0  | 0.0  | 0.0 |
| 21UR-129570 | 0.0  | 0.0  | 0.0  | 0.0  | 0.0  | 0.0 |
| 21UR-129580 | 1.0  | 1.0  | 1.0  | 1.0  | 0.0  | 0.0 |
| 21UR-129590 | 0.0  | 0.0  | 0.0  | 0.0  | 0.0  | 0.0 |
| 21UR-12960  | 1.0  | 1.0  | 0.0  | 0.0  | 0.0  | 0.0 |
| 21UR-129600 | 1.0  | 0.0  | 0.0  | 0.0  | 0.0  | 0.0 |
| 21UR-129610 | 0.0  | 1.0  | 1.0  | 0.0  | 0.0  | 0.0 |

|             |      |      |      |      |      |     |
|-------------|------|------|------|------|------|-----|
| 21UR-129620 | 1.0  | 1.0  | 1.0  | 1.0  | 0.0  | 0.0 |
| 21UR-129630 | 0.0  | 0.0  | 0.0  | 0.0  | 0.0  | 0.0 |
| 21UR-129640 | 0.0  | 0.0  | 0.0  | 0.0  | 0.0  | 0.0 |
| 21UR-129650 | 0.0  | 0.0  | 0.0  | 0.0  | 1.0  | 0.0 |
| 21UR-129660 | 1.0  | 1.0  | 0.0  | 0.0  | 0.0  | 0.0 |
| 21UR-129670 | 33.0 | 28.0 | 35.0 | 17.0 | 10.0 | 0.0 |
| 21UR-129680 | 0.0  | 0.0  | 0.0  | 0.0  | 0.0  | 1.0 |
| 21UR-129690 | 0.0  | 0.0  | 0.0  | 0.0  | 0.0  | 0.0 |
| 21UR-12970  | 1.0  | 0.0  | 0.0  | 0.0  | 0.0  | 0.0 |
| 21UR-129700 | 14.0 | 3.0  | 4.0  | 2.0  | 3.0  | 2.0 |
| 21UR-129710 | 0.0  | 0.0  | 0.0  | 0.0  | 0.0  | 0.0 |
| 21UR-129720 | 14.0 | 22.0 | 16.0 | 3.0  | 9.0  | 2.0 |
| 21UR-129730 | 0.0  | 0.0  | 0.0  | 0.0  | 0.0  | 0.0 |
| 21UR-129740 | 0.0  | 0.0  | 0.0  | 0.1  | 0.0  | 0.0 |
| 21UR-129750 | 0.0  | 0.0  | 0.0  | 0.0  | 0.0  | 0.0 |
| 21UR-129760 | 0.0  | 1.0  | 1.0  | 0.0  | 0.0  | 0.0 |
| 21UR-129770 | 0.0  | 0.0  | 0.0  | 0.0  | 0.0  | 0.0 |
| 21UR-129780 | 1.0  | 2.0  | 0.0  | 0.0  | 2.0  | 0.0 |
| 21UR-129790 | 0.0  | 0.0  | 0.0  | 0.0  | 0.0  | 0.0 |
| 21UR-12980  | 0.0  | 0.0  | 0.0  | 0.0  | 0.0  | 0.0 |
| 21UR-129800 | 0.0  | 0.0  | 0.0  | 0.0  | 0.0  | 0.0 |
| 21UR-129810 | 0.0  | 0.0  | 0.0  | 0.0  | 0.0  | 0.0 |
| 21UR-129820 | 0.0  | 0.0  | 0.0  | 0.0  | 0.0  | 0.0 |
| 21UR-129830 | 0.0  | 0.0  | 0.0  | 0.0  | 0.0  | 0.0 |
| 21UR-129840 | 0.0  | 0.0  | 0.0  | 0.0  | 0.0  | 0.0 |
| 21UR-129850 | 1.0  | 0.0  | 0.0  | 0.0  | 0.0  | 0.0 |
| 21UR-129860 | 0.0  | 0.0  | 0.0  | 0.0  | 0.0  | 0.0 |
| 21UR-129870 | 0.0  | 0.0  | 0.0  | 0.0  | 0.0  | 0.0 |
| 21UR-129880 | 0.0  | 0.0  | 0.0  | 0.0  | 1.0  | 0.0 |
| 21UR-129890 | 0.0  | 0.0  | 0.0  | 0.0  | 0.0  | 0.1 |
| 21UR-12990  | 0.0  | 1.0  | 4.0  | 0.0  | 1.0  | 1.0 |
| 21UR-129900 | 0.0  | 0.0  | 0.0  | 0.0  | 0.0  | 0.0 |
| 21UR-129910 | 0.0  | 0.0  | 0.0  | 0.0  | 0.0  | 0.0 |
| 21UR-129920 | 0.0  | 0.0  | 0.0  | 0.0  | 0.0  | 0.0 |
| 21UR-129930 | 0.0  | 0.0  | 1.0  | 1.0  | 0.0  | 0.0 |
| 21UR-129940 | 0.0  | 0.0  | 0.0  | 0.0  | 0.0  | 0.0 |
| 21UR-129950 | 0.0  | 0.0  | 0.0  | 0.0  | 0.0  | 0.0 |
| 21UR-129960 | 4.0  | 0.0  | 0.0  | 0.0  | 0.0  | 0.0 |
| 21UR-129970 | 36.5 | 3.0  | 40.0 | 16.0 | 13.0 | 0.0 |
| 21UR-129980 | 0.0  | 0.0  | 0.0  | 0.0  | 0.0  | 0.0 |
| 21UR-129990 | 0.0  | 0.0  | 1.0  | 0.0  | 0.0  | 0.0 |
| 21UR-130    | 0.0  | 1.0  | 0.0  | 0.0  | 0.0  | 0.0 |
| 21UR-1300   | 8.0  | 9.0  | 22.0 | 9.0  | 23.0 | 0.0 |
| 21UR-13000  | 1.0  | 12.0 | 4.0  | 0.0  | 10.0 | 2.0 |
| 21UR-130000 | 17.5 | 2.1  | 23.0 | 1.0  | 3.0  | 1.1 |
| 21UR-130010 | 0.0  | 0.0  | 0.0  | 0.0  | 0.0  | 0.0 |
| 21UR-130030 | 0.0  | 0.0  | 0.0  | 0.0  | 0.0  | 0.0 |
| 21UR-130050 | 1.0  | 2.0  | 2.0  | 0.0  | 0.0  | 0.0 |
| 21UR-130060 | 18.0 | 1.3  | 10.0 | 10.0 | 0.0  | 0.0 |
| 21UR-130070 | 2.0  | 0.0  | 1.0  | 0.0  | 0.0  | 0.0 |
| 21UR-130080 | 0.0  | 0.0  | 0.0  | 0.0  | 0.0  | 0.0 |

|             |       |       |       |      |      |      |
|-------------|-------|-------|-------|------|------|------|
| 21UR-130090 | 14.0  | 12.0  | 12.0  | 9.0  | 14.0 | 1.0  |
| 21UR-13010  | 0.0   | 0.0   | 0.0   | 0.0  | 0.0  | 1.0  |
| 21UR-130100 | 25.0  | 1.0   | 14.0  | 10.0 | 6.0  | 0.1  |
| 21UR-130110 | 0.0   | 0.0   | 0.0   | 0.0  | 0.0  | 0.0  |
| 21UR-130120 | 0.0   | 0.0   | 0.0   | 0.0  | 0.0  | 0.0  |
| 21UR-130130 | 0.0   | 0.0   | 0.0   | 0.0  | 0.0  | 0.0  |
| 21UR-130140 | 0.0   | 0.0   | 0.0   | 0.0  | 0.0  | 0.0  |
| 21UR-130150 | 0.0   | 0.0   | 0.0   | 0.0  | 0.0  | 0.0  |
| 21UR-130160 | 0.0   | 0.0   | 0.0   | 0.0  | 0.0  | 0.0  |
| 21UR-130170 | 0.0   | 0.0   | 1.0   | 0.0  | 0.0  | 0.0  |
| 21UR-130180 | 0.0   | 0.0   | 0.0   | 0.0  | 0.0  | 0.0  |
| 21UR-130190 | 0.0   | 0.0   | 0.0   | 0.0  | 0.0  | 0.0  |
| 21UR-13020  | 0.0   | 2.0   | 0.0   | 0.0  | 1.0  | 0.0  |
| 21UR-130200 | 1.0   | 0.0   | 0.0   | 0.0  | 0.0  | 0.0  |
| 21UR-130210 | 0.0   | 0.0   | 0.0   | 0.0  | 0.0  | 0.0  |
| 21UR-130220 | 9.0   | 3.0   | 14.0  | 3.0  | 2.0  | 1.0  |
| 21UR-130230 | 0.0   | 10.5  | 0.0   | 0.0  | 2.0  | 0.0  |
| 21UR-130240 | 0.0   | 1.0   | 0.0   | 0.0  | 0.0  | 0.0  |
| 21UR-130250 | 0.0   | 0.0   | 0.0   | 0.0  | 0.0  | 0.0  |
| 21UR-130260 | 0.0   | 1.0   | 1.0   | 0.0  | 1.0  | 0.0  |
| 21UR-130270 | 0.0   | 0.0   | 0.0   | 0.0  | 0.0  | 0.0  |
| 21UR-130280 | 11.0  | 1.0   | 13.0  | 5.0  | 2.0  | 0.0  |
| 21UR-130290 | 5.0   | 0.5   | 4.0   | 7.0  | 3.0  | 0.0  |
| 21UR-13030  | 0.0   | 0.0   | 1.0   | 0.0  | 3.0  | 0.0  |
| 21UR-130300 | 1.0   | 2.0   | 0.0   | 0.0  | 2.0  | 1.0  |
| 21UR-130310 | 1.0   | 0.0   | 0.0   | 0.0  | 0.0  | 0.0  |
| 21UR-130320 | 0.0   | 0.0   | 0.0   | 0.0  | 0.0  | 0.0  |
| 21UR-130330 | 0.0   | 0.0   | 0.0   | 0.0  | 0.0  | 0.0  |
| 21UR-130340 | 0.0   | 0.0   | 0.0   | 0.0  | 0.0  | 0.0  |
| 21UR-130360 | 0.0   | 0.0   | 0.0   | 0.0  | 0.0  | 0.0  |
| 21UR-130370 | 0.0   | 0.0   | 0.0   | 0.0  | 0.0  | 0.0  |
| 21UR-130380 | 0.0   | 1.0   | 1.0   | 0.0  | 0.0  | 0.0  |
| 21UR-130390 | 4.0   | 5.0   | 13.0  | 11.0 | 5.0  | 1.0  |
| 21UR-13040  | 1.0   | 4.0   | 1.0   | 1.0  | 0.0  | 0.0  |
| 21UR-130400 | 0.0   | 0.0   | 0.0   | 0.0  | 1.0  | 0.0  |
| 21UR-130410 | 0.0   | 0.0   | 0.0   | 0.0  | 1.0  | 1.0  |
| 21UR-130420 | 2.0   | 0.3   | 1.0   | 0.0  | 1.0  | 1.0  |
| 21UR-130430 | 1.0   | 1.0   | 0.0   | 0.0  | 1.0  | 0.0  |
| 21UR-130440 | 0.0   | 0.0   | 0.0   | 0.0  | 1.0  | 0.0  |
| 21UR-130450 | 0.0   | 0.1   | 0.0   | 0.0  | 0.0  | 0.0  |
| 21UR-130460 | 0.0   | 0.0   | 0.0   | 0.0  | 0.0  | 0.0  |
| 21UR-130470 | 0.0   | 0.2   | 0.0   | 0.0  | 0.0  | 0.2  |
| 21UR-130480 | 0.0   | 0.0   | 0.0   | 0.0  | 0.0  | 0.0  |
| 21UR-130490 | 0.0   | 0.0   | 3.0   | 0.0  | 3.0  | 0.0  |
| 21UR-13050  | 0.0   | 0.0   | 0.0   | 0.0  | 0.0  | 0.0  |
| 21UR-130500 | 7.0   | 20.0  | 11.0  | 6.0  | 17.0 | 1.0  |
| 21UR-130510 | 0.0   | 0.0   | 0.0   | 0.0  | 0.0  | 0.0  |
| 21UR-130530 | 209.0 | 153.0 | 174.0 | 95.0 | 51.0 | 17.0 |
| 21UR-130540 | 0.0   | 0.3   | 0.0   | 0.0  | 0.0  | 0.0  |
| 21UR-130550 | 0.0   | 0.0   | 7.0   | 0.0  | 1.0  | 0.0  |
| 21UR-130560 | 2.0   | 1.0   | 1.0   | 1.0  | 3.0  | 0.0  |

|             |       |       |       |       |       |      |
|-------------|-------|-------|-------|-------|-------|------|
| 21UR-130570 | 0.0   | 0.0   | 1.0   | 1.0   | 0.0   | 0.0  |
| 21UR-130580 | 0.0   | 0.0   | 0.0   | 0.0   | 0.0   | 0.0  |
| 21UR-130590 | 0.0   | 0.0   | 0.0   | 0.0   | 0.0   | 0.0  |
| 21UR-13060  | 34.0  | 1.0   | 14.0  | 15.0  | 5.0   | 0.1  |
| 21UR-130600 | 33.0  | 3.0   | 25.0  | 11.0  | 5.3   | 2.0  |
| 21UR-130610 | 0.0   | 0.0   | 0.0   | 0.0   | 0.0   | 0.0  |
| 21UR-130620 | 0.0   | 0.0   | 0.0   | 0.0   | 0.0   | 0.0  |
| 21UR-130630 | 49.0  | 174.0 | 44.0  | 26.0  | 163.5 | 10.0 |
| 21UR-130640 | 62.0  | 39.0  | 29.0  | 22.0  | 73.0  | 14.0 |
| 21UR-130650 | 0.0   | 0.0   | 0.0   | 0.0   | 0.0   | 0.0  |
| 21UR-130660 | 0.0   | 0.0   | 0.0   | 0.0   | 0.0   | 0.0  |
| 21UR-130670 | 4.0   | 0.0   | 0.0   | 0.0   | 0.0   | 0.0  |
| 21UR-130680 | 0.0   | 0.0   | 0.0   | 0.0   | 0.0   | 0.0  |
| 21UR-130690 | 0.0   | 0.0   | 1.0   | 0.0   | 0.0   | 0.0  |
| 21UR-13070  | 0.0   | 0.0   | 0.0   | 0.0   | 0.0   | 0.0  |
| 21UR-130700 | 5.0   | 0.0   | 2.0   | 0.0   | 4.0   | 0.0  |
| 21UR-130710 | 0.0   | 0.0   | 1.0   | 1.0   | 1.0   | 0.0  |
| 21UR-130720 | 25.0  | 6.0   | 12.0  | 1.0   | 0.0   | 0.0  |
| 21UR-130730 | 19.0  | 12.0  | 13.0  | 12.0  | 17.0  | 3.0  |
| 21UR-130740 | 0.0   | 0.0   | 2.0   | 0.0   | 0.0   | 0.0  |
| 21UR-130750 | 16.0  | 0.0   | 11.0  | 6.0   | 1.0   | 1.0  |
| 21UR-130760 | 3.0   | 1.0   | 1.0   | 0.0   | 0.0   | 1.0  |
| 21UR-130770 | 0.0   | 0.0   | 0.0   | 0.0   | 0.0   | 0.0  |
| 21UR-130780 | 3.0   | 7.0   | 6.0   | 2.0   | 8.0   | 1.0  |
| 21UR-130790 | 2.0   | 18.5  | 5.0   | 1.0   | 14.0  | 2.0  |
| 21UR-130800 | 0.0   | 0.0   | 0.0   | 0.0   | 0.0   | 0.0  |
| 21UR-130810 | 0.0   | 0.0   | 0.0   | 0.0   | 0.0   | 0.0  |
| 21UR-130820 | 0.0   | 0.0   | 1.0   | 0.0   | 1.0   | 0.0  |
| 21UR-130830 | 0.0   | 0.0   | 0.0   | 0.0   | 0.0   | 0.0  |
| 21UR-130840 | 0.0   | 0.0   | 0.0   | 0.0   | 0.0   | 0.0  |
| 21UR-130850 | 0.0   | 0.0   | 0.0   | 0.0   | 0.0   | 0.0  |
| 21UR-130860 | 24.0  | 6.0   | 31.0  | 7.0   | 16.0  | 1.0  |
| 21UR-130870 | 0.0   | 0.0   | 1.0   | 2.0   | 2.0   | 0.0  |
| 21UR-130880 | 1.0   | 0.0   | 0.0   | 0.0   | 0.0   | 0.0  |
| 21UR-130890 | 49.0  | 38.0  | 42.0  | 12.0  | 41.0  | 3.0  |
| 21UR-13090  | 0.0   | 1.0   | 1.0   | 0.0   | 4.0   | 0.0  |
| 21UR-130900 | 0.0   | 0.0   | 0.0   | 0.0   | 0.0   | 0.0  |
| 21UR-130910 | 2.0   | 1.0   | 1.0   | 2.0   | 0.0   | 0.0  |
| 21UR-130920 | 10.0  | 0.0   | 3.0   | 0.0   | 4.0   | 1.0  |
| 21UR-130930 | 0.0   | 0.0   | 0.0   | 1.0   | 2.0   | 0.0  |
| 21UR-130940 | 1.0   | 0.0   | 0.0   | 0.0   | 0.0   | 0.0  |
| 21UR-130950 | 6.0   | 0.0   | 6.0   | 3.0   | 7.0   | 0.0  |
| 21UR-130960 | 0.0   | 0.0   | 0.0   | 0.0   | 0.0   | 0.0  |
| 21UR-130970 | 0.0   | 0.0   | 0.0   | 0.0   | 1.0   | 0.0  |
| 21UR-130980 | 1.0   | 0.0   | 0.0   | 0.0   | 0.0   | 0.0  |
| 21UR-130990 | 2.0   | 3.0   | 0.0   | 2.0   | 1.0   | 1.0  |
| 21UR-1310   | 1.0   | 0.0   | 0.0   | 0.0   | 0.0   | 0.0  |
| 21UR-13100  | 0.0   | 0.0   | 0.0   | 0.0   | 0.0   | 0.0  |
| 21UR-131000 | 1.0   | 0.0   | 0.0   | 0.0   | 0.0   | 0.0  |
| 21UR-131010 | 0.0   | 0.0   | 0.0   | 0.0   | 0.0   | 0.0  |
| 21UR-131020 | 376.0 | 97.4  | 382.0 | 253.0 | 147.0 | 12.0 |

|             |      |      |      |      |      |     |
|-------------|------|------|------|------|------|-----|
| 21UR-131030 | 0.0  | 0.0  | 0.0  | 0.0  | 0.0  | 0.0 |
| 21UR-131040 | 5.0  | 2.0  | 4.0  | 0.0  | 1.0  | 0.0 |
| 21UR-131050 | 0.0  | 0.0  | 0.0  | 0.0  | 0.0  | 0.0 |
| 21UR-131060 | 0.0  | 0.0  | 0.0  | 0.0  | 0.0  | 0.0 |
| 21UR-131070 | 0.0  | 0.0  | 0.0  | 0.0  | 0.0  | 0.0 |
| 21UR-131080 | 1.0  | 0.0  | 1.0  | 0.0  | 0.0  | 0.0 |
| 21UR-131090 | 0.0  | 0.0  | 0.0  | 0.0  | 0.0  | 0.0 |
| 21UR-13110  | 6.0  | 17.0 | 6.0  | 8.0  | 4.0  | 0.0 |
| 21UR-131100 | 9.0  | 1.4  | 14.0 | 0.0  | 3.0  | 0.0 |
| 21UR-131110 | 0.0  | 0.0  | 0.0  | 0.0  | 0.0  | 0.0 |
| 21UR-131120 | 3.0  | 8.0  | 5.0  | 2.0  | 32.5 | 2.0 |
| 21UR-131130 | 0.0  | 0.0  | 0.0  | 0.0  | 0.0  | 0.0 |
| 21UR-131140 | 0.0  | 0.0  | 0.0  | 0.0  | 0.0  | 0.0 |
| 21UR-131150 | 0.0  | 0.0  | 0.0  | 0.0  | 0.0  | 0.0 |
| 21UR-131160 | 0.0  | 0.0  | 0.0  | 0.0  | 0.0  | 0.0 |
| 21UR-131170 | 0.0  | 0.0  | 0.0  | 0.0  | 0.0  | 0.0 |
| 21UR-131180 | 0.0  | 0.0  | 0.0  | 0.0  | 0.0  | 0.0 |
| 21UR-131190 | 0.0  | 0.0  | 0.0  | 0.0  | 0.0  | 0.0 |
| 21UR-13120  | 25.0 | 3.0  | 30.0 | 10.0 | 2.0  | 0.0 |
| 21UR-131200 | 7.0  | 3.0  | 2.0  | 0.0  | 1.0  | 6.0 |
| 21UR-131210 | 0.0  | 0.0  | 0.0  | 0.0  | 0.0  | 0.0 |
| 21UR-131220 | 0.0  | 0.0  | 0.0  | 0.0  | 0.0  | 0.0 |
| 21UR-131230 | 0.0  | 0.0  | 0.0  | 0.0  | 0.0  | 0.0 |
| 21UR-131240 | 4.0  | 0.0  | 3.0  | 0.0  | 0.0  | 1.0 |
| 21UR-131250 | 0.0  | 0.0  | 0.0  | 0.0  | 0.0  | 0.0 |
| 21UR-131260 | 1.0  | 1.0  | 0.0  | 1.0  | 0.0  | 0.0 |
| 21UR-131270 | 3.0  | 36.0 | 5.0  | 2.0  | 29.0 | 1.0 |
| 21UR-131280 | 0.0  | 0.0  | 0.0  | 0.0  | 0.0  | 0.0 |
| 21UR-131290 | 1.0  | 0.0  | 0.0  | 0.0  | 1.0  | 0.0 |
| 21UR-13130  | 21.0 | 0.0  | 14.0 | 1.0  | 1.0  | 0.0 |
| 21UR-131300 | 0.0  | 0.0  | 0.0  | 0.0  | 0.0  | 0.0 |
| 21UR-131310 | 0.0  | 0.0  | 0.0  | 0.0  | 0.0  | 0.0 |
| 21UR-131320 | 0.0  | 0.0  | 0.0  | 0.0  | 0.0  | 0.0 |
| 21UR-131330 | 6.0  | 1.0  | 3.0  | 2.0  | 1.0  | 0.0 |
| 21UR-131340 | 0.0  | 0.0  | 0.0  | 0.0  | 0.0  | 0.0 |
| 21UR-131350 | 0.0  | 0.0  | 0.0  | 0.0  | 0.0  | 0.0 |
| 21UR-131360 | 0.0  | 0.0  | 1.0  | 0.0  | 0.0  | 0.0 |
| 21UR-131370 | 0.0  | 0.0  | 0.0  | 0.0  | 0.0  | 0.0 |
| 21UR-131380 | 0.0  | 0.0  | 0.0  | 0.0  | 0.0  | 0.0 |
| 21UR-131390 | 54.0 | 13.0 | 63.0 | 29.0 | 57.0 | 2.0 |
| 21UR-13140  | 9.0  | 0.0  | 40.0 | 11.0 | 0.0  | 1.0 |
| 21UR-131400 | 3.0  | 0.0  | 0.0  | 1.0  | 0.0  | 0.0 |
| 21UR-131410 | 0.0  | 0.0  | 0.0  | 0.0  | 0.0  | 0.0 |
| 21UR-131420 | 8.0  | 2.0  | 4.0  | 15.0 | 9.0  | 0.0 |
| 21UR-131430 | 0.0  | 0.0  | 0.0  | 0.0  | 0.0  | 0.0 |
| 21UR-131440 | 0.0  | 0.1  | 0.0  | 0.0  | 0.0  | 0.0 |
| 21UR-131450 | 0.0  | 0.0  | 0.0  | 0.0  | 0.0  | 0.0 |
| 21UR-131460 | 0.0  | 0.2  | 0.0  | 0.0  | 0.1  | 0.2 |
| 21UR-131470 | 0.0  | 0.0  | 0.0  | 0.0  | 0.0  | 0.0 |
| 21UR-131480 | 0.0  | 0.0  | 0.0  | 0.0  | 0.0  | 0.0 |
| 21UR-131490 | 0.0  | 0.0  | 0.0  | 0.0  | 0.0  | 0.0 |

|             |       |      |       |      |      |     |
|-------------|-------|------|-------|------|------|-----|
| 21UR-13150  | 17.0  | 6.0  | 17.0  | 5.0  | 8.0  | 0.0 |
| 21UR-131500 | 0.0   | 0.0  | 0.0   | 0.0  | 0.0  | 0.0 |
| 21UR-131510 | 0.0   | 0.0  | 0.0   | 0.0  | 0.0  | 0.0 |
| 21UR-131520 | 0.0   | 0.0  | 0.0   | 0.0  | 0.0  | 0.0 |
| 21UR-131530 | 0.0   | 0.0  | 0.0   | 0.0  | 0.0  | 0.0 |
| 21UR-131540 | 0.0   | 0.0  | 0.0   | 0.0  | 0.0  | 0.0 |
| 21UR-131550 | 0.0   | 0.0  | 0.0   | 0.0  | 1.0  | 0.0 |
| 21UR-131560 | 0.0   | 0.0  | 0.0   | 0.0  | 0.0  | 0.0 |
| 21UR-131570 | 0.0   | 0.0  | 0.0   | 0.0  | 0.1  | 0.0 |
| 21UR-131580 | 0.0   | 0.0  | 0.0   | 0.0  | 0.0  | 0.0 |
| 21UR-131590 | 4.0   | 0.0  | 0.0   | 0.0  | 0.0  | 0.0 |
| 21UR-13160  | 0.0   | 2.0  | 0.0   | 0.0  | 3.0  | 0.0 |
| 21UR-131600 | 0.0   | 0.0  | 0.0   | 0.0  | 0.0  | 0.0 |
| 21UR-131610 | 0.0   | 0.0  | 0.0   | 0.0  | 0.0  | 0.0 |
| 21UR-131620 | 4.0   | 1.0  | 0.0   | 0.0  | 0.0  | 0.0 |
| 21UR-131630 | 0.0   | 0.0  | 0.0   | 0.0  | 0.0  | 0.0 |
| 21UR-131640 | 0.0   | 0.0  | 0.0   | 0.0  | 0.0  | 0.0 |
| 21UR-131650 | 4.0   | 0.0  | 0.0   | 0.0  | 0.0  | 0.0 |
| 21UR-131660 | 0.0   | 0.0  | 0.0   | 0.0  | 0.0  | 0.0 |
| 21UR-131670 | 0.0   | 0.0  | 0.0   | 0.0  | 0.0  | 0.0 |
| 21UR-131680 | 0.0   | 0.0  | 0.0   | 0.0  | 0.0  | 0.0 |
| 21UR-13170  | 148.0 | 12.0 | 122.0 | 37.0 | 22.0 | 4.0 |
| 21UR-131700 | 0.0   | 0.0  | 0.0   | 0.0  | 0.0  | 0.0 |
| 21UR-131710 | 1.0   | 0.0  | 0.0   | 0.0  | 1.0  | 0.0 |
| 21UR-131720 | 1.0   | 0.0  | 0.0   | 0.0  | 0.0  | 0.0 |
| 21UR-131730 | 3.0   | 0.0  | 8.0   | 0.0  | 1.1  | 1.0 |
| 21UR-131740 | 0.0   | 0.0  | 0.0   | 0.0  | 0.0  | 0.0 |
| 21UR-131750 | 0.0   | 0.0  | 0.0   | 0.0  | 0.0  | 0.0 |
| 21UR-131760 | 9.0   | 7.5  | 13.0  | 9.0  | 9.0  | 4.0 |
| 21UR-131770 | 0.0   | 0.0  | 0.0   | 0.0  | 0.0  | 0.0 |
| 21UR-131780 | 0.0   | 0.0  | 0.0   | 0.0  | 0.0  | 0.0 |
| 21UR-131790 | 1.0   | 0.0  | 4.0   | 1.0  | 0.0  | 0.0 |
| 21UR-13180  | 0.0   | 0.0  | 0.0   | 0.0  | 1.0  | 0.0 |
| 21UR-131800 | 0.0   | 0.0  | 0.0   | 0.0  | 0.0  | 0.0 |
| 21UR-131810 | 3.0   | 0.0  | 0.0   | 0.0  | 0.0  | 0.0 |
| 21UR-131820 | 22.0  | 1.0  | 20.0  | 3.0  | 0.0  | 1.0 |
| 21UR-131830 | 77.0  | 27.2 | 52.0  | 31.0 | 9.0  | 3.0 |
| 21UR-131840 | 0.0   | 0.0  | 1.0   | 0.0  | 0.0  | 0.0 |
| 21UR-131850 | 0.0   | 0.0  | 0.0   | 0.0  | 0.0  | 0.0 |
| 21UR-131860 | 0.0   | 0.0  | 0.0   | 0.0  | 0.0  | 0.0 |
| 21UR-131870 | 0.0   | 0.0  | 0.0   | 0.0  | 0.0  | 0.0 |
| 21UR-131880 | 0.0   | 0.0  | 0.0   | 0.0  | 0.0  | 0.0 |
| 21UR-131890 | 0.0   | 1.3  | 0.0   | 0.0  | 0.0  | 0.8 |
| 21UR-13190  | 0.0   | 0.0  | 0.0   | 0.0  | 0.0  | 0.0 |
| 21UR-131900 | 0.0   | 0.0  | 0.0   | 0.0  | 0.0  | 0.0 |
| 21UR-131910 | 0.0   | 0.0  | 0.0   | 0.0  | 0.0  | 0.0 |
| 21UR-131920 | 6.0   | 3.0  | 10.0  | 1.0  | 2.0  | 0.0 |
| 21UR-131930 | 1.0   | 0.0  | 0.0   | 1.0  | 0.0  | 0.0 |
| 21UR-131940 | 0.0   | 0.0  | 0.0   | 0.0  | 0.0  | 0.0 |
| 21UR-131950 | 16.0  | 0.0  | 10.0  | 1.0  | 1.0  | 0.0 |
| 21UR-131960 | 1.0   | 0.0  | 8.0   | 1.0  | 1.0  | 1.0 |



|             |       |       |       |      |      |      |
|-------------|-------|-------|-------|------|------|------|
| 21UR-131970 | 0.0   | 0.0   | 0.0   | 0.0  | 0.0  | 0.0  |
| 21UR-131980 | 0.0   | 0.0   | 0.0   | 0.0  | 0.0  | 0.0  |
| 21UR-131990 | 0.0   | 0.0   | 0.0   | 0.0  | 0.0  | 0.0  |
| 21UR-1320   | 0.5   | 0.0   | 0.0   | 0.0  | 0.0  | 0.0  |
| 21UR-13200  | 0.0   | 0.0   | 0.0   | 0.0  | 0.0  | 0.0  |
| 21UR-132000 | 14.0  | 0.0   | 1.0   | 4.0  | 0.0  | 0.0  |
| 21UR-132010 | 0.0   | 1.0   | 0.0   | 0.0  | 0.0  | 0.0  |
| 21UR-132020 | 9.0   | 0.0   | 6.0   | 2.0  | 0.0  | 0.0  |
| 21UR-132030 | 0.0   | 0.0   | 0.0   | 0.0  | 0.0  | 0.0  |
| 21UR-132040 | 17.0  | 16.0  | 43.8  | 10.0 | 18.0 | 2.0  |
| 21UR-132050 | 1.0   | 1.0   | 2.0   | 0.0  | 3.0  | 0.0  |
| 21UR-132060 | 0.0   | 0.0   | 0.0   | 0.0  | 0.0  | 0.0  |
| 21UR-132070 | 0.0   | 0.0   | 0.0   | 0.0  | 0.0  | 0.0  |
| 21UR-132080 | 0.0   | 0.0   | 0.0   | 0.0  | 0.0  | 0.0  |
| 21UR-132090 | 0.0   | 2.0   | 2.0   | 0.0  | 2.0  | 1.0  |
| 21UR-13210  | 0.0   | 1.0   | 0.0   | 1.0  | 1.0  | 0.0  |
| 21UR-132100 | 0.0   | 0.0   | 0.0   | 0.0  | 0.0  | 0.0  |
| 21UR-132110 | 0.0   | 0.0   | 1.0   | 0.0  | 0.0  | 0.0  |
| 21UR-132120 | 3.0   | 0.0   | 3.0   | 3.0  | 0.0  | 0.0  |
| 21UR-132130 | 0.0   | 0.0   | 0.0   | 0.0  | 0.0  | 0.0  |
| 21UR-132140 | 0.0   | 0.0   | 0.0   | 0.0  | 0.0  | 0.0  |
| 21UR-132150 | 0.0   | 1.0   | 0.0   | 3.0  | 41.0 | 10.0 |
| 21UR-132160 | 0.0   | 0.0   | 0.0   | 0.0  | 0.0  | 0.0  |
| 21UR-132170 | 0.0   | 0.0   | 0.0   | 0.0  | 0.0  | 0.0  |
| 21UR-132180 | 0.0   | 0.0   | 0.0   | 0.0  | 0.0  | 0.0  |
| 21UR-132190 | 0.0   | 0.0   | 0.0   | 0.0  | 0.0  | 0.0  |
| 21UR-13220  | 0.0   | 0.0   | 0.0   | 0.0  | 0.0  | 0.0  |
| 21UR-132200 | 0.0   | 0.0   | 0.0   | 0.0  | 0.0  | 0.0  |
| 21UR-132210 | 0.0   | 0.0   | 0.0   | 0.0  | 0.0  | 0.0  |
| 21UR-132220 | 0.0   | 0.0   | 0.0   | 0.0  | 0.0  | 0.0  |
| 21UR-132230 | 0.0   | 0.0   | 0.0   | 0.0  | 0.0  | 0.0  |
| 21UR-132240 | 13.0  | 0.0   | 7.0   | 3.0  | 0.0  | 1.0  |
| 21UR-132250 | 2.0   | 1.0   | 4.0   | 0.0  | 1.0  | 0.0  |
| 21UR-132260 | 0.0   | 0.0   | 0.0   | 0.0  | 0.0  | 0.0  |
| 21UR-132270 | 0.0   | 0.0   | 0.0   | 0.0  | 0.0  | 0.0  |
| 21UR-132280 | 4.0   | 1.0   | 6.0   | 1.0  | 4.0  | 1.0  |
| 21UR-132290 | 0.0   | 0.0   | 0.0   | 0.0  | 0.0  | 0.0  |
| 21UR-13230  | 0.0   | 0.0   | 0.0   | 0.0  | 0.0  | 0.0  |
| 21UR-132300 | 0.0   | 0.0   | 0.0   | 1.0  | 0.0  | 0.0  |
| 21UR-132310 | 0.0   | 0.0   | 0.0   | 0.0  | 0.0  | 0.0  |
| 21UR-132320 | 0.0   | 0.0   | 0.0   | 0.0  | 0.0  | 0.0  |
| 21UR-132330 | 20.0  | 20.0  | 18.0  | 5.0  | 20.0 | 5.0  |
| 21UR-132340 | 8.0   | 7.0   | 7.0   | 3.0  | 34.1 | 0.0  |
| 21UR-132350 | 0.0   | 0.0   | 0.0   | 0.0  | 0.0  | 0.0  |
| 21UR-132360 | 0.0   | 0.0   | 0.0   | 0.0  | 0.0  | 0.0  |
| 21UR-132370 | 0.0   | 0.0   | 0.0   | 0.0  | 0.0  | 0.0  |
| 21UR-132380 | 0.0   | 0.1   | 0.0   | 0.0  | 0.0  | 0.0  |
| 21UR-132390 | 0.0   | 0.2   | 0.0   | 0.0  | 0.1  | 0.0  |
| 21UR-13240  | 127.0 | 105.5 | 106.0 | 42.0 | 45.0 | 1.0  |
| 21UR-132400 | 0.0   | 0.0   | 0.0   | 0.0  | 0.0  | 0.0  |
| 21UR-132410 | 0.0   | 0.0   | 0.0   | 0.0  | 0.0  | 0.0  |

|             |       |       |       |      |      |      |
|-------------|-------|-------|-------|------|------|------|
| 21UR-132420 | 91.0  | 2.0   | 76.0  | 40.5 | 16.0 | 1.0  |
| 21UR-132430 | 0.0   | 1.1   | 6.0   | 1.0  | 0.0  | 0.0  |
| 21UR-132440 | 2.0   | 0.0   | 2.0   | 0.0  | 1.0  | 1.0  |
| 21UR-132450 | 0.0   | 0.0   | 0.0   | 0.0  | 0.0  | 0.0  |
| 21UR-132460 | 128.0 | 109.0 | 113.0 | 56.0 | 68.0 | 12.0 |
| 21UR-132470 | 0.0   | 0.0   | 0.0   | 0.0  | 0.0  | 0.0  |
| 21UR-132480 | 6.0   | 9.0   | 10.0  | 3.0  | 4.0  | 0.0  |
| 21UR-132490 | 1.0   | 0.0   | 0.0   | 0.0  | 0.0  | 0.0  |
| 21UR-13250  | 0.0   | 0.0   | 1.0   | 0.0  | 1.0  | 0.0  |
| 21UR-132500 | 0.0   | 0.0   | 0.0   | 0.0  | 0.0  | 0.0  |
| 21UR-132510 | 0.0   | 0.0   | 0.0   | 0.0  | 0.0  | 0.0  |
| 21UR-132520 | 1.0   | 1.1   | 3.0   | 0.0  | 6.0  | 1.0  |
| 21UR-132530 | 0.0   | 0.0   | 0.0   | 0.0  | 0.0  | 0.0  |
| 21UR-132540 | 0.0   | 0.0   | 1.0   | 0.0  | 0.0  | 0.0  |
| 21UR-132550 | 0.0   | 0.0   | 0.0   | 0.0  | 0.5  | 0.5  |
| 21UR-132560 | 2.0   | 0.0   | 2.0   | 0.0  | 3.0  | 0.0  |
| 21UR-132570 | 1.0   | 0.0   | 4.0   | 0.0  | 1.0  | 0.0  |
| 21UR-132580 | 0.0   | 0.0   | 0.0   | 0.0  | 0.0  | 0.0  |
| 21UR-132590 | 0.0   | 0.0   | 0.0   | 0.0  | 0.0  | 0.0  |
| 21UR-13260  | 14.0  | 3.0   | 0.0   | 2.0  | 0.0  | 0.0  |
| 21UR-132600 | 0.0   | 0.0   | 0.0   | 0.0  | 0.0  | 0.0  |
| 21UR-132610 | 0.0   | 0.0   | 2.0   | 0.0  | 0.0  | 0.0  |
| 21UR-132620 | 0.0   | 0.0   | 0.0   | 0.0  | 0.0  | 0.0  |
| 21UR-132630 | 28.0  | 3.0   | 12.0  | 8.0  | 3.0  | 0.0  |
| 21UR-132640 | 0.0   | 0.0   | 0.0   | 0.0  | 0.0  | 0.0  |
| 21UR-132650 | 4.0   | 1.0   | 6.0   | 3.0  | 6.0  | 0.0  |
| 21UR-132660 | 1.0   | 0.0   | 0.0   | 0.0  | 0.0  | 0.0  |
| 21UR-132670 | 0.0   | 0.0   | 0.0   | 0.0  | 0.0  | 0.0  |
| 21UR-132680 | 0.0   | 0.0   | 0.0   | 0.0  | 0.0  | 0.0  |
| 21UR-132690 | 0.0   | 0.0   | 0.0   | 0.0  | 0.0  | 0.0  |
| 21UR-13270  | 4.0   | 0.0   | 12.0  | 1.0  | 6.0  | 2.0  |
| 21UR-132700 | 0.0   | 0.0   | 0.0   | 0.0  | 0.0  | 0.0  |
| 21UR-132710 | 3.0   | 0.0   | 0.0   | 0.0  | 3.0  | 0.0  |
| 21UR-132720 | 52.0  | 2.0   | 44.0  | 11.0 | 2.1  | 0.0  |
| 21UR-132730 | 45.0  | 11.0  | 32.0  | 12.0 | 21.0 | 0.0  |
| 21UR-132740 | 0.0   | 6.9   | 0.0   | 0.0  | 0.0  | 1.7  |
| 21UR-132750 | 0.0   | 0.0   | 0.0   | 0.0  | 0.0  | 0.0  |
| 21UR-132760 | 0.0   | 1.0   | 1.0   | 0.0  | 3.0  | 0.0  |
| 21UR-132770 | 0.0   | 0.0   | 0.0   | 0.0  | 0.0  | 0.0  |
| 21UR-132780 | 0.0   | 0.1   | 0.0   | 0.0  | 1.0  | 0.1  |
| 21UR-132790 | 22.0  | 8.0   | 16.0  | 22.0 | 1.0  | 1.0  |
| 21UR-13280  | 0.0   | 0.0   | 1.0   | 0.0  | 0.0  | 0.0  |
| 21UR-132800 | 0.0   | 0.0   | 0.0   | 0.0  | 0.0  | 0.0  |
| 21UR-132810 | 1.0   | 0.0   | 0.0   | 0.0  | 0.0  | 0.0  |
| 21UR-132820 | 0.0   | 0.0   | 0.0   | 0.0  | 0.0  | 0.0  |
| 21UR-132830 | 11.0  | 1.2   | 9.0   | 1.0  | 1.0  | 0.0  |
| 21UR-132840 | 0.0   | 0.0   | 0.0   | 0.0  | 0.0  | 0.0  |
| 21UR-132850 | 0.0   | 0.0   | 0.0   | 0.0  | 0.0  | 0.0  |
| 21UR-132860 | 0.0   | 0.0   | 0.0   | 0.0  | 0.0  | 0.0  |
| 21UR-132870 | 0.0   | 0.0   | 0.0   | 0.0  | 0.0  | 0.0  |
| 21UR-132880 | 0.0   | 0.0   | 0.0   | 0.0  | 0.0  | 0.0  |

|             |      |      |      |      |      |     |
|-------------|------|------|------|------|------|-----|
| 21UR-132890 | 0.0  | 0.0  | 0.0  | 0.0  | 0.0  | 0.0 |
| 21UR-13290  | 0.0  | 0.0  | 0.0  | 0.0  | 0.0  | 0.0 |
| 21UR-132900 | 0.0  | 0.0  | 0.0  | 0.0  | 0.0  | 0.0 |
| 21UR-132910 | 0.0  | 0.0  | 0.0  | 0.0  | 0.0  | 0.0 |
| 21UR-132920 | 0.0  | 0.0  | 0.0  | 0.0  | 0.0  | 0.0 |
| 21UR-132940 | 0.0  | 0.0  | 0.0  | 0.0  | 0.0  | 0.0 |
| 21UR-132950 | 0.0  | 0.0  | 0.0  | 0.0  | 0.0  | 0.0 |
| 21UR-132960 | 0.0  | 2.0  | 0.0  | 0.0  | 0.0  | 0.0 |
| 21UR-132970 | 0.0  | 0.0  | 0.0  | 0.0  | 0.0  | 0.0 |
| 21UR-132980 | 0.0  | 0.0  | 0.0  | 0.0  | 0.0  | 0.0 |
| 21UR-132990 | 0.0  | 0.0  | 0.0  | 0.0  | 0.0  | 0.0 |
| 21UR-1330   | 0.0  | 0.0  | 0.0  | 0.0  | 0.0  | 0.0 |
| 21UR-13300  | 45.0 | 9.0  | 22.0 | 1.0  | 0.0  | 0.0 |
| 21UR-133000 | 0.0  | 0.0  | 0.0  | 0.0  | 0.0  | 0.0 |
| 21UR-133010 | 0.0  | 0.0  | 0.0  | 0.0  | 0.0  | 0.0 |
| 21UR-133020 | 0.0  | 0.0  | 0.0  | 0.0  | 0.0  | 0.0 |
| 21UR-133030 | 0.0  | 0.0  | 0.0  | 0.0  | 0.0  | 0.0 |
| 21UR-133040 | 1.0  | 0.0  | 1.0  | 0.0  | 0.0  | 0.0 |
| 21UR-133050 | 0.0  | 0.0  | 0.0  | 0.0  | 0.0  | 0.0 |
| 21UR-133060 | 0.0  | 0.0  | 0.0  | 0.0  | 0.0  | 0.0 |
| 21UR-133070 | 0.0  | 0.0  | 0.0  | 0.0  | 0.0  | 0.0 |
| 21UR-133080 | 0.0  | 0.0  | 1.0  | 0.0  | 0.0  | 0.0 |
| 21UR-133090 | 29.0 | 6.0  | 12.0 | 8.0  | 3.0  | 0.0 |
| 21UR-13310  | 0.0  | 0.0  | 0.0  | 0.0  | 1.0  | 0.0 |
| 21UR-133100 | 0.0  | 0.0  | 0.0  | 0.0  | 0.0  | 0.0 |
| 21UR-133110 | 16.0 | 57.0 | 31.0 | 9.0  | 53.0 | 5.0 |
| 21UR-133120 | 0.0  | 0.0  | 0.0  | 0.0  | 0.0  | 0.0 |
| 21UR-133130 | 0.0  | 0.0  | 0.0  | 0.0  | 0.0  | 0.0 |
| 21UR-133140 | 0.0  | 0.0  | 0.0  | 0.0  | 0.0  | 0.0 |
| 21UR-133150 | 0.0  | 0.0  | 0.0  | 0.0  | 0.0  | 0.0 |
| 21UR-133160 | 0.0  | 0.0  | 0.0  | 0.0  | 0.0  | 0.0 |
| 21UR-133170 | 0.0  | 0.0  | 0.0  | 0.0  | 0.0  | 0.0 |
| 21UR-133180 | 0.0  | 0.0  | 0.0  | 0.0  | 0.0  | 0.0 |
| 21UR-133190 | 0.0  | 0.0  | 0.0  | 0.0  | 0.0  | 0.0 |
| 21UR-13320  | 61.0 | 6.0  | 38.0 | 20.0 | 23.0 | 0.0 |
| 21UR-133200 | 0.0  | 0.0  | 0.0  | 0.0  | 0.0  | 0.0 |
| 21UR-133210 | 0.0  | 0.0  | 0.0  | 0.0  | 5.0  | 0.0 |
| 21UR-133220 | 12.0 | 14.0 | 7.0  | 3.0  | 7.0  | 2.0 |
| 21UR-133230 | 1.0  | 5.0  | 0.0  | 1.0  | 1.0  | 0.0 |
| 21UR-133240 | 0.0  | 0.0  | 0.0  | 0.0  | 0.0  | 0.0 |
| 21UR-133250 | 0.0  | 0.0  | 0.0  | 0.0  | 0.0  | 0.0 |
| 21UR-133260 | 0.0  | 0.0  | 0.0  | 0.0  | 0.0  | 0.0 |
| 21UR-133270 | 0.0  | 0.0  | 0.0  | 0.0  | 0.0  | 0.0 |
| 21UR-133280 | 0.0  | 1.0  | 0.0  | 0.0  | 1.0  | 0.0 |
| 21UR-133290 | 0.0  | 0.0  | 0.0  | 0.0  | 0.0  | 0.0 |
| 21UR-13330  | 0.0  | 8.0  | 0.0  | 0.0  | 0.0  | 1.0 |
| 21UR-133300 | 0.0  | 0.0  | 0.0  | 0.0  | 0.0  | 0.0 |
| 21UR-133310 | 0.0  | 1.0  | 1.0  | 0.0  | 0.0  | 0.0 |
| 21UR-133320 | 0.0  | 0.0  | 0.0  | 0.0  | 0.0  | 0.0 |
| 21UR-133330 | 0.0  | 0.0  | 0.0  | 0.0  | 0.0  | 0.0 |
| 21UR-133340 | 0.0  | 0.0  | 0.0  | 0.0  | 0.0  | 0.0 |

|             |       |      |       |       |      |     |
|-------------|-------|------|-------|-------|------|-----|
| 21UR-133350 | 0.0   | 0.0  | 0.0   | 1.0   | 0.0  | 0.0 |
| 21UR-133360 | 0.0   | 0.0  | 0.0   | 0.0   | 0.0  | 0.0 |
| 21UR-133370 | 36.0  | 24.0 | 39.0  | 16.0  | 19.0 | 6.0 |
| 21UR-133380 | 16.0  | 2.0  | 22.0  | 11.0  | 1.0  | 1.0 |
| 21UR-133390 | 2.0   | 0.0  | 0.0   | 0.0   | 0.0  | 0.0 |
| 21UR-13340  | 1.0   | 0.0  | 0.0   | 0.0   | 0.0  | 0.0 |
| 21UR-133400 | 15.0  | 5.0  | 5.0   | 0.0   | 2.0  | 0.0 |
| 21UR-133410 | 511.0 | 19.0 | 420.0 | 117.0 | 14.0 | 2.0 |
| 21UR-133430 | 0.0   | 0.0  | 0.0   | 0.0   | 0.0  | 0.0 |
| 21UR-133440 | 0.0   | 0.0  | 1.0   | 0.0   | 0.0  | 0.0 |
| 21UR-133450 | 7.0   | 2.0  | 5.0   | 1.0   | 2.0  | 0.0 |
| 21UR-133460 | 1.0   | 0.0  | 0.0   | 0.0   | 0.0  | 0.0 |
| 21UR-133470 | 11.0  | 5.0  | 7.0   | 5.0   | 4.0  | 0.0 |
| 21UR-133480 | 0.0   | 0.0  | 0.0   | 0.0   | 0.0  | 0.0 |
| 21UR-133490 | 0.0   | 0.0  | 0.0   | 0.0   | 0.0  | 0.0 |
| 21UR-13350  | 6.0   | 0.0  | 3.0   | 4.0   | 0.0  | 0.0 |
| 21UR-133500 | 0.0   | 0.0  | 0.0   | 0.0   | 1.0  | 0.0 |
| 21UR-133510 | 0.0   | 0.0  | 0.0   | 0.0   | 0.0  | 0.0 |
| 21UR-133520 | 0.0   | 0.0  | 1.0   | 0.0   | 0.0  | 0.0 |
| 21UR-133530 | 0.0   | 0.0  | 0.0   | 0.0   | 0.0  | 0.0 |
| 21UR-133540 | 0.0   | 0.1  | 0.0   | 0.0   | 0.0  | 0.0 |
| 21UR-133550 | 0.0   | 0.0  | 0.0   | 0.0   | 0.0  | 0.0 |
| 21UR-133560 | 0.0   | 0.0  | 0.0   | 0.0   | 0.0  | 0.0 |
| 21UR-133570 | 8.0   | 6.0  | 5.0   | 7.0   | 1.0  | 0.0 |
| 21UR-133580 | 5.0   | 1.0  | 2.0   | 0.0   | 3.0  | 0.0 |
| 21UR-133590 | 0.0   | 0.0  | 0.0   | 0.0   | 0.0  | 0.0 |
| 21UR-13360  | 2.0   | 0.0  | 6.0   | 0.0   | 0.0  | 0.0 |
| 21UR-133600 | 0.0   | 0.0  | 0.0   | 0.0   | 0.0  | 0.0 |
| 21UR-133610 | 56.0  | 19.0 | 46.0  | 21.0  | 23.0 | 3.0 |
| 21UR-133620 | 0.0   | 0.0  | 0.0   | 0.0   | 0.0  | 0.0 |
| 21UR-133630 | 0.0   | 0.0  | 0.0   | 0.0   | 1.0  | 0.0 |
| 21UR-133640 | 0.0   | 0.0  | 0.0   | 0.0   | 1.0  | 0.0 |
| 21UR-133650 | 19.0  | 0.2  | 19.0  | 4.0   | 0.0  | 1.2 |
| 21UR-133660 | 0.0   | 0.0  | 0.0   | 0.0   | 0.0  | 1.0 |
| 21UR-133670 | 5.0   | 9.0  | 7.0   | 5.0   | 1.0  | 0.0 |
| 21UR-133680 | 0.0   | 1.0  | 0.0   | 0.0   | 0.0  | 0.0 |
| 21UR-133690 | 0.0   | 0.0  | 0.0   | 0.0   | 0.0  | 0.0 |
| 21UR-13370  | 6.0   | 0.0  | 8.0   | 1.0   | 1.0  | 0.0 |
| 21UR-133700 | 0.0   | 0.0  | 0.0   | 0.0   | 0.0  | 0.0 |
| 21UR-133710 | 1.0   | 0.0  | 1.0   | 0.0   | 0.0  | 0.0 |
| 21UR-133720 | 0.0   | 0.0  | 0.0   | 0.0   | 0.0  | 0.0 |
| 21UR-133730 | 0.0   | 0.0  | 0.0   | 0.0   | 0.0  | 0.0 |
| 21UR-133740 | 4.0   | 2.0  | 1.0   | 0.0   | 0.0  | 0.0 |
| 21UR-133750 | 0.0   | 1.0  | 0.0   | 0.0   | 0.0  | 0.0 |
| 21UR-133760 | 1.0   | 0.0  | 0.0   | 0.0   | 0.0  | 0.0 |
| 21UR-133770 | 0.0   | 0.0  | 0.0   | 0.0   | 0.0  | 0.0 |
| 21UR-133780 | 0.0   | 0.0  | 0.0   | 0.0   | 0.0  | 0.0 |
| 21UR-133790 | 0.0   | 0.0  | 0.0   | 0.0   | 0.0  | 0.0 |
| 21UR-13380  | 0.0   | 0.0  | 0.0   | 0.0   | 0.0  | 0.0 |
| 21UR-133800 | 0.0   | 0.0  | 0.0   | 0.0   | 0.0  | 0.0 |
| 21UR-133810 | 0.0   | 0.0  | 0.0   | 0.0   | 0.0  | 0.0 |

|             |       |       |       |       |       |      |
|-------------|-------|-------|-------|-------|-------|------|
| 21UR-133820 | 0.0   | 0.0   | 0.0   | 0.0   | 0.0   | 0.0  |
| 21UR-133830 | 0.0   | 0.0   | 0.0   | 0.0   | 0.0   | 0.0  |
| 21UR-133840 | 0.0   | 0.0   | 0.0   | 0.0   | 0.0   | 0.0  |
| 21UR-133850 | 0.0   | 0.0   | 0.0   | 0.0   | 0.0   | 0.0  |
| 21UR-133860 | 0.0   | 0.0   | 0.0   | 0.0   | 0.0   | 0.0  |
| 21UR-133870 | 0.0   | 0.0   | 0.0   | 0.0   | 0.0   | 0.0  |
| 21UR-133880 | 10.0  | 7.0   | 6.0   | 2.0   | 0.0   | 2.0  |
| 21UR-13390  | 11.0  | 33.0  | 12.0  | 4.0   | 10.0  | 1.0  |
| 21UR-133900 | 0.0   | 0.0   | 0.0   | 0.0   | 0.0   | 0.0  |
| 21UR-133910 | 0.0   | 0.0   | 0.0   | 0.0   | 0.0   | 0.0  |
| 21UR-133920 | 6.0   | 1.0   | 4.0   | 4.0   | 2.0   | 4.0  |
| 21UR-133930 | 0.0   | 0.0   | 0.0   | 0.0   | 0.0   | 0.0  |
| 21UR-133940 | 0.0   | 0.0   | 0.0   | 0.0   | 0.0   | 0.0  |
| 21UR-133950 | 0.0   | 0.0   | 0.0   | 0.0   | 0.0   | 0.0  |
| 21UR-133960 | 0.0   | 0.0   | 0.0   | 0.0   | 0.0   | 0.0  |
| 21UR-133970 | 0.0   | 1.0   | 0.0   | 0.0   | 0.0   | 0.0  |
| 21UR-133980 | 0.0   | 0.0   | 0.0   | 0.0   | 0.0   | 0.0  |
| 21UR-133990 | 0.0   | 0.0   | 0.0   | 0.0   | 1.0   | 0.0  |
| 21UR-1340   | 7.0   | 0.0   | 0.0   | 1.0   | 0.0   | 0.0  |
| 21UR-13400  | 1.0   | 0.0   | 0.0   | 0.0   | 0.0   | 0.0  |
| 21UR-134000 | 0.0   | 0.0   | 0.0   | 0.0   | 0.0   | 0.5  |
| 21UR-134010 | 0.0   | 1.0   | 1.0   | 0.0   | 5.0   | 0.0  |
| 21UR-134020 | 1.0   | 0.0   | 0.0   | 0.0   | 0.0   | 0.0  |
| 21UR-134030 | 181.0 | 2.0   | 257.0 | 74.0  | 36.0  | 0.0  |
| 21UR-134040 | 0.0   | 0.0   | 0.0   | 0.0   | 0.0   | 0.0  |
| 21UR-134050 | 0.0   | 0.0   | 0.0   | 0.0   | 0.0   | 0.0  |
| 21UR-134060 | 0.0   | 0.0   | 0.0   | 0.0   | 0.0   | 0.0  |
| 21UR-134070 | 0.0   | 0.0   | 0.0   | 0.0   | 0.0   | 0.0  |
| 21UR-134080 | 0.0   | 0.0   | 2.0   | 0.0   | 0.0   | 0.0  |
| 21UR-134090 | 0.0   | 1.0   | 0.0   | 0.0   | 1.0   | 0.0  |
| 21UR-13410  | 1.0   | 0.0   | 1.0   | 0.0   | 0.0   | 1.0  |
| 21UR-134100 | 26.0  | 11.0  | 15.0  | 2.0   | 14.0  | 3.0  |
| 21UR-134110 | 0.0   | 0.0   | 0.0   | 0.0   | 0.0   | 0.0  |
| 21UR-134120 | 0.0   | 0.0   | 0.0   | 0.0   | 0.0   | 0.0  |
| 21UR-134130 | 0.0   | 0.0   | 0.0   | 0.0   | 0.0   | 0.0  |
| 21UR-134140 | 0.0   | 0.0   | 0.0   | 0.0   | 0.0   | 0.0  |
| 21UR-134150 | 1.0   | 0.0   | 5.0   | 0.0   | 0.0   | 0.0  |
| 21UR-134160 | 0.0   | 0.0   | 0.0   | 0.0   | 0.0   | 0.0  |
| 21UR-134170 | 0.0   | 0.0   | 0.0   | 0.0   | 0.0   | 0.0  |
| 21UR-134180 | 0.0   | 1.0   | 0.0   | 0.0   | 1.0   | 0.0  |
| 21UR-134190 | 459.7 | 100.0 | 328.5 | 235.0 | 261.5 | 18.0 |
| 21UR-13420  | 0.0   | 1.0   | 1.0   | 0.0   | 1.0   | 0.0  |
| 21UR-134200 | 2.0   | 1.0   | 3.0   | 2.0   | 0.0   | 0.0  |
| 21UR-134210 | 0.0   | 0.0   | 0.0   | 0.0   | 0.0   | 0.0  |
| 21UR-134220 | 0.0   | 0.0   | 0.0   | 0.0   | 0.0   | 0.0  |
| 21UR-134230 | 1.0   | 8.0   | 3.0   | 1.0   | 2.0   | 1.0  |
| 21UR-134240 | 0.0   | 0.0   | 0.0   | 0.0   | 0.0   | 0.0  |
| 21UR-134250 | 0.0   | 0.0   | 0.0   | 0.0   | 0.0   | 0.0  |
| 21UR-134260 | 0.0   | 1.0   | 0.0   | 0.0   | 0.0   | 0.0  |
| 21UR-134270 | 0.0   | 0.0   | 0.0   | 0.0   | 0.0   | 0.0  |
| 21UR-134280 | 0.0   | 0.0   | 0.0   | 0.0   | 0.0   | 0.0  |

|             |       |      |       |       |       |     |
|-------------|-------|------|-------|-------|-------|-----|
| 21UR-134290 | 0.0   | 0.0  | 0.0   | 0.0   | 0.0   | 0.0 |
| 21UR-13430  | 721.5 | 48.0 | 528.7 | 278.0 | 166.5 | 5.0 |
| 21UR-134300 | 0.0   | 0.0  | 0.0   | 1.0   | 0.0   | 0.0 |
| 21UR-134310 | 0.0   | 0.0  | 0.0   | 0.0   | 0.0   | 0.0 |
| 21UR-134320 | 0.0   | 0.0  | 0.0   | 0.0   | 0.0   | 0.0 |
| 21UR-134330 | 0.0   | 0.0  | 0.0   | 0.0   | 0.0   | 0.0 |
| 21UR-134340 | 0.0   | 0.1  | 0.0   | 0.0   | 0.0   | 0.0 |
| 21UR-134350 | 0.0   | 0.0  | 0.0   | 0.0   | 0.0   | 0.0 |
| 21UR-134360 | 0.0   | 0.0  | 0.0   | 0.0   | 0.0   | 0.0 |
| 21UR-134370 | 0.0   | 1.0  | 1.0   | 0.0   | 2.0   | 0.0 |
| 21UR-134380 | 0.0   | 0.0  | 0.0   | 0.0   | 0.0   | 0.0 |
| 21UR-134390 | 0.0   | 0.0  | 1.0   | 0.0   | 0.0   | 0.0 |
| 21UR-13440  | 3.5   | 0.0  | 6.0   | 1.0   | 6.1   | 0.0 |
| 21UR-134400 | 0.0   | 0.0  | 0.0   | 0.0   | 0.0   | 0.0 |
| 21UR-134410 | 0.0   | 0.0  | 0.0   | 0.0   | 0.0   | 0.0 |
| 21UR-134420 | 1.0   | 0.0  | 0.0   | 0.0   | 1.0   | 0.0 |
| 21UR-134430 | 0.0   | 0.0  | 0.0   | 0.0   | 0.0   | 0.0 |
| 21UR-134440 | 0.0   | 0.0  | 0.0   | 0.0   | 0.0   | 0.0 |
| 21UR-134450 | 0.0   | 0.0  | 0.0   | 0.0   | 0.0   | 0.0 |
| 21UR-134460 | 1.0   | 0.0  | 0.0   | 0.0   | 1.0   | 0.0 |
| 21UR-134470 | 0.0   | 0.0  | 0.0   | 0.0   | 0.0   | 0.0 |
| 21UR-134480 | 0.0   | 7.0  | 1.0   | 0.0   | 0.0   | 0.0 |
| 21UR-134490 | 0.0   | 0.0  | 0.0   | 0.0   | 0.0   | 0.0 |
| 21UR-13450  | 0.0   | 0.0  | 0.0   | 0.0   | 0.0   | 0.0 |
| 21UR-134500 | 0.0   | 1.0  | 0.0   | 0.0   | 1.0   | 0.0 |
| 21UR-134510 | 0.0   | 0.0  | 1.0   | 0.0   | 1.0   | 0.0 |
| 21UR-134520 | 0.0   | 0.0  | 0.0   | 0.0   | 0.0   | 0.0 |
| 21UR-134530 | 0.0   | 0.0  | 0.0   | 0.0   | 0.0   | 0.0 |
| 21UR-134540 | 0.0   | 0.0  | 0.0   | 0.0   | 0.0   | 0.0 |
| 21UR-134550 | 0.0   | 0.0  | 0.0   | 0.0   | 0.0   | 0.0 |
| 21UR-134560 | 0.0   | 0.0  | 0.0   | 0.0   | 0.0   | 0.0 |
| 21UR-134570 | 0.0   | 1.0  | 0.0   | 0.0   | 0.0   | 0.0 |
| 21UR-134580 | 0.0   | 0.0  | 0.0   | 0.0   | 0.1   | 0.0 |
| 21UR-134590 | 0.0   | 0.0  | 0.0   | 0.0   | 0.0   | 0.0 |
| 21UR-13460  | 0.0   | 2.0  | 0.0   | 1.0   | 0.0   | 1.0 |
| 21UR-134600 | 6.0   | 1.2  | 2.0   | 0.0   | 0.0   | 0.0 |
| 21UR-134610 | 0.0   | 0.0  | 0.0   | 0.0   | 0.0   | 0.0 |
| 21UR-134620 | 0.0   | 0.0  | 1.0   | 0.0   | 0.0   | 0.0 |
| 21UR-134630 | 0.0   | 0.0  | 0.0   | 0.0   | 0.0   | 0.0 |
| 21UR-134640 | 115.0 | 16.0 | 100.0 | 58.0  | 25.0  | 5.0 |
| 21UR-134650 | 0.0   | 0.0  | 0.0   | 0.0   | 0.0   | 0.0 |
| 21UR-134660 | 0.0   | 0.0  | 0.0   | 0.0   | 0.0   | 0.0 |
| 21UR-134670 | 0.0   | 0.0  | 0.0   | 0.0   | 0.0   | 1.0 |
| 21UR-134680 | 0.0   | 0.1  | 0.0   | 0.0   | 0.0   | 0.4 |
| 21UR-134690 | 0.0   | 0.0  | 0.0   | 0.0   | 0.0   | 0.0 |
| 21UR-13470  | 0.0   | 0.0  | 0.0   | 0.0   | 0.0   | 0.0 |
| 21UR-134700 | 0.0   | 0.0  | 0.0   | 0.0   | 0.0   | 0.0 |
| 21UR-134710 | 0.0   | 0.0  | 3.0   | 0.0   | 0.0   | 0.0 |
| 21UR-134720 | 0.0   | 0.0  | 1.0   | 0.0   | 0.0   | 0.0 |
| 21UR-134730 | 0.0   | 1.0  | 0.0   | 0.0   | 0.0   | 0.0 |
| 21UR-134740 | 0.0   | 0.0  | 0.0   | 0.0   | 0.0   | 0.0 |

|             |       |      |       |      |      |     |
|-------------|-------|------|-------|------|------|-----|
| 21UR-134750 | 0.0   | 0.0  | 0.0   | 0.0  | 0.0  | 0.0 |
| 21UR-134760 | 79.0  | 27.2 | 55.0  | 31.0 | 9.0  | 3.0 |
| 21UR-134770 | 0.0   | 0.0  | 0.0   | 0.0  | 1.0  | 0.0 |
| 21UR-134780 | 6.0   | 22.2 | 6.0   | 1.0  | 19.3 | 0.0 |
| 21UR-134790 | 0.0   | 0.0  | 1.0   | 1.0  | 1.0  | 0.0 |
| 21UR-13480  | 4.0   | 0.0  | 0.0   | 0.0  | 0.0  | 0.0 |
| 21UR-134800 | 0.0   | 0.0  | 0.0   | 0.0  | 0.0  | 0.0 |
| 21UR-134810 | 23.0  | 19.0 | 20.0  | 8.0  | 47.0 | 2.0 |
| 21UR-134830 | 0.0   | 0.0  | 0.0   | 0.0  | 0.0  | 0.0 |
| 21UR-134840 | 1.0   | 1.0  | 0.0   | 0.0  | 0.0  | 0.0 |
| 21UR-134850 | 1.0   | 1.0  | 0.0   | 0.0  | 2.0  | 0.0 |
| 21UR-134860 | 0.0   | 0.0  | 0.0   | 0.0  | 0.0  | 0.0 |
| 21UR-134870 | 1.0   | 0.0  | 0.0   | 0.0  | 2.0  | 0.0 |
| 21UR-134880 | 4.0   | 0.0  | 1.0   | 0.0  | 0.0  | 0.0 |
| 21UR-134890 | 0.0   | 0.0  | 0.0   | 0.0  | 0.0  | 0.0 |
| 21UR-13490  | 8.0   | 1.0  | 12.0  | 1.0  | 2.0  | 0.0 |
| 21UR-134900 | 5.0   | 8.0  | 3.0   | 0.0  | 6.0  | 0.0 |
| 21UR-134910 | 0.0   | 0.0  | 2.0   | 0.0  | 1.0  | 0.0 |
| 21UR-134920 | 0.0   | 0.0  | 0.0   | 1.0  | 0.0  | 0.0 |
| 21UR-134930 | 0.0   | 0.0  | 0.0   | 0.0  | 0.0  | 0.0 |
| 21UR-134940 | 12.0  | 22.1 | 10.0  | 6.0  | 25.0 | 2.0 |
| 21UR-134950 | 0.0   | 0.0  | 0.0   | 0.0  | 0.0  | 0.0 |
| 21UR-134970 | 1.0   | 8.0  | 0.0   | 0.0  | 12.0 | 0.0 |
| 21UR-134980 | 0.0   | 0.0  | 0.0   | 0.0  | 0.0  | 0.0 |
| 21UR-134990 | 0.0   | 1.0  | 0.0   | 0.0  | 0.0  | 0.0 |
| 21UR-1350   | 0.0   | 0.0  | 1.0   | 0.0  | 0.0  | 0.0 |
| 21UR-13500  | 0.0   | 0.0  | 1.0   | 0.0  | 0.0  | 0.0 |
| 21UR-135000 | 2.0   | 0.0  | 0.0   | 0.0  | 0.0  | 0.0 |
| 21UR-135010 | 159.0 | 44.0 | 156.0 | 99.0 | 82.0 | 4.0 |
| 21UR-135020 | 127.0 | 7.0  | 162.0 | 74.0 | 68.0 | 0.0 |
| 21UR-135030 | 0.0   | 0.0  | 0.0   | 0.0  | 1.0  | 0.0 |
| 21UR-135040 | 0.0   | 0.0  | 0.0   | 0.0  | 0.0  | 0.0 |
| 21UR-135050 | 0.0   | 0.0  | 0.0   | 0.0  | 0.0  | 0.0 |
| 21UR-135060 | 0.0   | 0.0  | 0.0   | 0.0  | 0.0  | 0.0 |
| 21UR-135070 | 0.0   | 0.0  | 0.0   | 0.0  | 0.0  | 0.0 |
| 21UR-135080 | 0.0   | 0.0  | 0.0   | 0.0  | 0.0  | 0.0 |
| 21UR-135090 | 0.0   | 0.0  | 0.0   | 0.0  | 0.0  | 0.0 |
| 21UR-13510  | 0.0   | 0.0  | 0.0   | 0.0  | 0.0  | 0.0 |
| 21UR-135100 | 0.0   | 0.0  | 0.0   | 0.0  | 0.0  | 0.0 |
| 21UR-135110 | 0.0   | 0.0  | 0.0   | 0.0  | 0.0  | 0.0 |
| 21UR-135120 | 0.0   | 0.0  | 0.0   | 0.0  | 0.0  | 0.0 |
| 21UR-135130 | 0.0   | 0.0  | 0.0   | 0.0  | 0.0  | 0.0 |
| 21UR-135140 | 0.0   | 0.0  | 0.0   | 0.0  | 0.0  | 0.0 |
| 21UR-135150 | 0.0   | 0.0  | 1.0   | 0.0  | 0.0  | 0.0 |
| 21UR-135160 | 0.0   | 0.0  | 0.0   | 0.0  | 0.0  | 0.0 |
| 21UR-135170 | 0.0   | 0.0  | 1.0   | 0.0  | 2.0  | 0.0 |
| 21UR-135180 | 0.0   | 0.0  | 1.0   | 1.0  | 0.0  | 0.0 |
| 21UR-135190 | 0.0   | 0.0  | 0.0   | 0.0  | 0.0  | 0.0 |
| 21UR-13520  | 158.0 | 14.0 | 90.0  | 35.0 | 13.0 | 4.0 |
| 21UR-135200 | 0.0   | 0.0  | 0.0   | 0.0  | 1.0  | 0.0 |
| 21UR-135210 | 0.0   | 0.0  | 0.0   | 0.0  | 0.0  | 0.0 |

|             |      |      |      |     |      |     |
|-------------|------|------|------|-----|------|-----|
| 21UR-135220 | 3.0  | 1.0  | 5.0  | 0.0 | 0.0  | 0.0 |
| 21UR-135230 | 0.0  | 0.0  | 0.0  | 0.0 | 0.0  | 0.0 |
| 21UR-135240 | 0.0  | 0.0  | 0.0  | 0.0 | 0.0  | 0.0 |
| 21UR-135250 | 0.0  | 0.0  | 0.0  | 0.0 | 0.0  | 0.0 |
| 21UR-135260 | 0.0  | 4.0  | 0.0  | 0.0 | 0.0  | 0.0 |
| 21UR-135270 | 1.0  | 0.0  | 1.0  | 0.0 | 0.0  | 0.0 |
| 21UR-135280 | 0.0  | 0.0  | 0.0  | 0.0 | 0.0  | 0.0 |
| 21UR-135290 | 3.0  | 0.0  | 1.0  | 0.0 | 0.0  | 0.0 |
| 21UR-13530  | 62.0 | 1.0  | 34.0 | 8.0 | 14.0 | 0.0 |
| 21UR-135300 | 0.0  | 0.0  | 0.0  | 0.0 | 0.0  | 0.0 |
| 21UR-135310 | 0.0  | 0.0  | 0.0  | 0.0 | 0.0  | 0.0 |
| 21UR-135320 | 0.0  | 2.0  | 0.0  | 0.0 | 0.0  | 1.0 |
| 21UR-135330 | 21.0 | 30.0 | 29.0 | 2.0 | 39.0 | 1.0 |
| 21UR-135340 | 0.0  | 0.0  | 0.0  | 0.0 | 0.0  | 0.0 |
| 21UR-135350 | 0.0  | 0.0  | 0.0  | 0.0 | 0.0  | 0.0 |
| 21UR-135360 | 0.0  | 0.0  | 0.0  | 0.0 | 0.0  | 0.0 |
| 21UR-135370 | 0.0  | 0.0  | 0.0  | 0.0 | 0.0  | 0.0 |
| 21UR-135380 | 0.0  | 0.0  | 0.0  | 0.0 | 0.0  | 0.0 |
| 21UR-135390 | 0.0  | 0.0  | 0.0  | 0.0 | 0.0  | 0.0 |
| 21UR-13540  | 1.0  | 1.0  | 1.0  | 0.0 | 0.0  | 0.0 |
| 21UR-135400 | 0.0  | 1.0  | 0.0  | 0.0 | 0.0  | 0.0 |
| 21UR-135410 | 0.0  | 0.0  | 0.0  | 0.0 | 0.0  | 0.0 |
| 21UR-135420 | 2.0  | 2.0  | 1.0  | 1.0 | 1.0  | 0.0 |
| 21UR-135430 | 7.0  | 0.0  | 8.0  | 2.0 | 0.0  | 0.0 |
| 21UR-135440 | 0.0  | 0.0  | 0.0  | 0.0 | 0.0  | 0.0 |
| 21UR-135460 | 0.0  | 0.0  | 0.0  | 0.0 | 0.0  | 0.0 |
| 21UR-135470 | 8.0  | 9.3  | 13.0 | 6.0 | 19.0 | 2.0 |
| 21UR-135480 | 0.0  | 0.0  | 0.0  | 0.0 | 0.0  | 0.0 |
| 21UR-135490 | 10.0 | 2.0  | 18.0 | 7.0 | 4.0  | 0.0 |
| 21UR-13550  | 27.0 | 2.0  | 16.0 | 6.0 | 9.0  | 0.0 |
| 21UR-135500 | 0.0  | 1.0  | 0.0  | 0.0 | 0.0  | 0.0 |
| 21UR-135510 | 0.0  | 0.0  | 0.0  | 0.0 | 0.0  | 0.0 |
| 21UR-135520 | 0.0  | 0.0  | 0.0  | 0.0 | 0.0  | 0.0 |
| 21UR-135530 | 0.0  | 0.0  | 0.0  | 0.0 | 0.0  | 0.0 |
| 21UR-135540 | 0.0  | 0.0  | 0.0  | 0.0 | 0.0  | 0.0 |
| 21UR-135550 | 0.0  | 0.0  | 0.0  | 0.0 | 0.0  | 0.0 |
| 21UR-135560 | 0.0  | 0.0  | 0.0  | 0.0 | 0.0  | 0.0 |
| 21UR-135570 | 0.0  | 0.0  | 0.0  | 0.0 | 0.0  | 0.0 |
| 21UR-135580 | 4.0  | 1.0  | 2.0  | 0.0 | 2.0  | 0.0 |
| 21UR-135590 | 0.0  | 0.0  | 0.0  | 0.0 | 0.0  | 0.0 |
| 21UR-13560  | 1.0  | 0.0  | 6.0  | 1.0 | 0.0  | 0.0 |
| 21UR-135600 | 0.0  | 0.0  | 0.0  | 0.0 | 0.0  | 0.0 |
| 21UR-135610 | 0.0  | 0.5  | 0.0  | 0.0 | 0.0  | 0.0 |
| 21UR-135620 | 0.0  | 0.0  | 0.0  | 0.0 | 0.0  | 0.0 |
| 21UR-135630 | 0.0  | 0.0  | 0.0  | 0.0 | 0.0  | 0.0 |
| 21UR-135640 | 0.0  | 0.0  | 0.0  | 0.0 | 0.0  | 0.0 |
| 21UR-135650 | 0.0  | 0.0  | 0.0  | 0.0 | 1.0  | 0.0 |
| 21UR-135660 | 7.0  | 4.3  | 7.0  | 2.0 | 18.0 | 0.0 |
| 21UR-135670 | 0.0  | 0.3  | 0.0  | 0.0 | 0.0  | 0.0 |
| 21UR-135680 | 0.0  | 0.0  | 0.0  | 0.0 | 0.0  | 0.0 |
| 21UR-135690 | 0.0  | 0.0  | 0.0  | 0.0 | 0.0  | 1.0 |



|             |        |       |        |        |       |      |
|-------------|--------|-------|--------|--------|-------|------|
| 21UR-13570  | 0.0    | 0.0   | 0.0    | 0.0    | 0.0   | 0.0  |
| 21UR-135700 | 0.0    | 0.0   | 0.0    | 0.0    | 0.0   | 0.0  |
| 21UR-135710 | 0.0    | 2.0   | 1.0    | 0.0    | 0.0   | 0.0  |
| 21UR-135720 | 2.0    | 1.0   | 5.0    | 0.0    | 1.0   | 0.0  |
| 21UR-135730 | 31.0   | 22.0  | 32.0   | 14.0   | 28.0  | 1.0  |
| 21UR-135740 | 0.0    | 0.0   | 0.0    | 0.0    | 0.0   | 0.0  |
| 21UR-135750 | 0.0    | 0.0   | 0.0    | 0.0    | 0.0   | 0.0  |
| 21UR-135760 | 0.0    | 0.0   | 0.0    | 0.0    | 0.0   | 0.0  |
| 21UR-135770 | 1.0    | 1.0   | 1.0    | 0.0    | 0.0   | 0.0  |
| 21UR-135780 | 0.0    | 0.0   | 0.0    | 0.0    | 0.0   | 0.0  |
| 21UR-135790 | 0.0    | 0.0   | 0.0    | 0.0    | 0.0   | 0.0  |
| 21UR-13580  | 23.5   | 1.0   | 11.0   | 1.0    | 0.0   | 1.0  |
| 21UR-135800 | 0.0    | 0.0   | 0.0    | 0.0    | 0.0   | 0.0  |
| 21UR-135810 | 0.0    | 0.0   | 0.0    | 0.0    | 0.0   | 0.0  |
| 21UR-135820 | 0.0    | 0.0   | 1.0    | 0.0    | 3.0   | 0.0  |
| 21UR-135830 | 0.0    | 0.0   | 0.0    | 0.0    | 0.0   | 0.0  |
| 21UR-135840 | 0.0    | 0.0   | 0.0    | 0.0    | 0.0   | 0.0  |
| 21UR-135850 | 0.0    | 1.0   | 0.0    | 0.0    | 1.0   | 0.0  |
| 21UR-135860 | 0.0    | 0.0   | 1.0    | 0.0    | 0.0   | 1.0  |
| 21UR-135870 | 0.0    | 0.0   | 0.0    | 0.0    | 0.0   | 0.0  |
| 21UR-135880 | 0.0    | 0.0   | 3.0    | 0.0    | 2.0   | 0.0  |
| 21UR-135890 | 1.0    | 0.0   | 1.0    | 0.0    | 0.0   | 1.0  |
| 21UR-13590  | 1.0    | 0.0   | 0.0    | 0.0    | 0.0   | 0.0  |
| 21UR-135900 | 1.0    | 0.0   | 0.0    | 0.0    | 0.0   | 0.0  |
| 21UR-135910 | 56.0   | 18.0  | 28.0   | 6.0    | 11.0  | 0.0  |
| 21UR-135920 | 0.0    | 0.0   | 0.0    | 0.0    | 0.0   | 0.0  |
| 21UR-135930 | 1.0    | 1.0   | 4.0    | 2.0    | 0.0   | 0.0  |
| 21UR-135940 | 0.0    | 0.0   | 0.0    | 0.0    | 0.0   | 0.0  |
| 21UR-135950 | 0.0    | 0.0   | 0.0    | 0.0    | 0.0   | 0.0  |
| 21UR-135960 | 0.0    | 0.0   | 0.0    | 0.0    | 0.0   | 0.0  |
| 21UR-135970 | 5.0    | 0.0   | 0.0    | 0.0    | 0.0   | 0.0  |
| 21UR-135980 | 0.0    | 0.0   | 0.0    | 0.0    | 0.0   | 0.0  |
| 21UR-135990 | 0.0    | 0.0   | 0.0    | 0.0    | 0.0   | 0.0  |
| 21UR-1360   | 21.0   | 3.0   | 30.0   | 0.0    | 12.0  | 1.0  |
| 21UR-13600  | 19.0   | 7.0   | 19.0   | 10.0   | 0.0   | 1.0  |
| 21UR-136000 | 0.0    | 0.0   | 0.0    | 0.0    | 0.0   | 1.0  |
| 21UR-136010 | 0.0    | 0.0   | 0.0    | 0.0    | 0.0   | 0.0  |
| 21UR-136020 | 0.0    | 0.0   | 0.0    | 0.0    | 0.0   | 0.0  |
| 21UR-136030 | 1966.5 | 333.5 | 1824.0 | 1210.5 | 503.0 | 55.0 |
| 21UR-136040 | 0.0    | 1.0   | 1.0    | 0.0    | 4.0   | 0.0  |
| 21UR-136050 | 19.0   | 3.0   | 26.0   | 4.0    | 9.0   | 0.0  |
| 21UR-136060 | 0.0    | 0.0   | 0.0    | 0.0    | 0.0   | 0.0  |
| 21UR-136070 | 0.0    | 0.0   | 0.0    | 0.0    | 0.0   | 0.0  |
| 21UR-136080 | 0.0    | 0.0   | 0.0    | 0.0    | 0.0   | 0.0  |
| 21UR-136090 | 1.0    | 3.0   | 3.0    | 1.0    | 3.0   | 0.0  |
| 21UR-13610  | 1.0    | 0.0   | 0.0    | 0.0    | 0.0   | 0.0  |
| 21UR-136100 | 0.0    | 1.0   | 2.0    | 0.0    | 1.0   | 1.0  |
| 21UR-136110 | 8.0    | 3.0   | 3.0    | 4.0    | 0.0   | 0.0  |
| 21UR-136120 | 0.0    | 1.0   | 0.0    | 0.0    | 0.0   | 0.0  |
| 21UR-136130 | 1.0    | 0.0   | 1.0    | 0.0    | 0.0   | 0.0  |
| 21UR-136140 | 0.0    | 0.0   | 0.0    | 0.0    | 0.0   | 0.0  |

|             |       |      |       |       |      |     |
|-------------|-------|------|-------|-------|------|-----|
| 21UR-136150 | 0.0   | 0.0  | 0.0   | 0.0   | 0.0  | 0.0 |
| 21UR-136160 | 0.0   | 0.0  | 0.0   | 0.0   | 0.0  | 0.0 |
| 21UR-136170 | 0.0   | 0.0  | 0.0   | 0.0   | 1.0  | 0.0 |
| 21UR-136180 | 0.0   | 0.0  | 0.0   | 0.0   | 0.0  | 0.0 |
| 21UR-136190 | 0.0   | 0.0  | 0.0   | 0.0   | 0.0  | 0.0 |
| 21UR-13620  | 8.0   | 0.0  | 8.0   | 1.0   | 1.0  | 0.0 |
| 21UR-136200 | 0.0   | 0.0  | 0.0   | 0.0   | 0.0  | 0.0 |
| 21UR-136210 | 0.0   | 0.2  | 0.0   | 0.0   | 1.0  | 0.3 |
| 21UR-136220 | 1.0   | 1.1  | 3.0   | 0.0   | 6.0  | 1.0 |
| 21UR-136230 | 46.0  | 26.5 | 44.0  | 6.0   | 21.0 | 1.0 |
| 21UR-136240 | 0.0   | 0.0  | 0.0   | 0.0   | 0.0  | 0.0 |
| 21UR-136250 | 537.0 | 37.0 | 341.0 | 122.0 | 10.0 | 2.1 |
| 21UR-136260 | 0.0   | 0.0  | 0.0   | 0.0   | 3.0  | 0.0 |
| 21UR-136270 | 0.0   | 0.0  | 1.0   | 0.0   | 5.0  | 0.0 |
| 21UR-136280 | 0.0   | 0.0  | 0.0   | 0.0   | 0.0  | 0.0 |
| 21UR-136290 | 0.0   | 0.0  | 0.0   | 0.0   | 0.0  | 0.0 |
| 21UR-13630  | 12.0  | 1.0  | 10.0  | 0.0   | 6.0  | 0.0 |
| 21UR-136300 | 0.0   | 0.0  | 0.0   | 0.0   | 0.0  | 0.0 |
| 21UR-136310 | 0.0   | 0.0  | 0.0   | 0.0   | 0.0  | 0.0 |
| 21UR-136320 | 0.0   | 0.0  | 0.0   | 0.0   | 0.0  | 0.0 |
| 21UR-136330 | 0.0   | 0.0  | 0.0   | 0.0   | 0.0  | 0.0 |
| 21UR-136340 | 0.0   | 0.0  | 0.0   | 0.0   | 1.0  | 0.0 |
| 21UR-136350 | 0.0   | 0.0  | 0.0   | 0.0   | 0.0  | 0.0 |
| 21UR-136360 | 0.0   | 0.0  | 0.0   | 0.0   | 0.0  | 0.0 |
| 21UR-136370 | 0.0   | 0.0  | 0.0   | 0.0   | 0.0  | 0.0 |
| 21UR-136380 | 0.0   | 0.0  | 0.0   | 0.0   | 0.0  | 0.0 |
| 21UR-136390 | 0.0   | 2.0  | 0.0   | 0.0   | 0.0  | 0.0 |
| 21UR-13640  | 0.0   | 0.0  | 0.0   | 0.0   | 0.0  | 0.0 |
| 21UR-136400 | 0.0   | 0.0  | 0.0   | 0.0   | 0.0  | 0.0 |
| 21UR-136410 | 0.0   | 0.0  | 0.0   | 0.0   | 0.0  | 0.0 |
| 21UR-136420 | 0.0   | 0.0  | 6.0   | 0.0   | 0.0  | 0.0 |
| 21UR-136430 | 0.0   | 0.0  | 0.0   | 0.0   | 0.0  | 0.0 |
| 21UR-136440 | 2.0   | 0.0  | 1.0   | 0.0   | 0.0  | 0.0 |
| 21UR-136450 | 0.0   | 0.0  | 0.0   | 0.0   | 0.0  | 0.0 |
| 21UR-136460 | 0.0   | 0.0  | 0.0   | 0.0   | 0.0  | 0.0 |
| 21UR-136470 | 0.0   | 0.0  | 0.0   | 0.0   | 0.0  | 0.0 |
| 21UR-136480 | 0.0   | 0.0  | 0.0   | 0.0   | 0.0  | 0.0 |
| 21UR-136490 | 0.0   | 0.0  | 0.0   | 0.0   | 0.0  | 0.0 |
| 21UR-13650  | 31.0  | 3.0  | 22.0  | 18.5  | 12.0 | 1.0 |
| 21UR-136500 | 0.0   | 0.0  | 0.0   | 0.0   | 0.0  | 0.0 |
| 21UR-136510 | 0.0   | 0.0  | 0.0   | 0.0   | 0.0  | 0.0 |
| 21UR-136520 | 1.0   | 0.0  | 0.0   | 0.0   | 0.0  | 0.0 |
| 21UR-136530 | 0.0   | 1.0  | 1.0   | 0.0   | 1.0  | 0.0 |
| 21UR-136540 | 0.0   | 0.0  | 0.0   | 0.0   | 0.0  | 0.0 |
| 21UR-136550 | 0.0   | 0.0  | 0.0   | 0.0   | 0.0  | 0.0 |
| 21UR-136560 | 0.0   | 0.0  | 0.0   | 0.0   | 0.0  | 0.0 |
| 21UR-136570 | 0.0   | 0.0  | 0.0   | 0.0   | 0.0  | 0.0 |
| 21UR-136580 | 0.0   | 0.0  | 0.0   | 4.0   | 0.0  | 0.0 |
| 21UR-136590 | 0.0   | 0.0  | 0.0   | 0.0   | 0.0  | 0.0 |
| 21UR-13660  | 1.0   | 0.0  | 0.0   | 0.0   | 8.0  | 0.0 |
| 21UR-136600 | 0.0   | 0.0  | 0.0   | 0.0   | 0.0  | 0.0 |

|             |       |       |       |      |       |      |
|-------------|-------|-------|-------|------|-------|------|
| 21UR-136610 | 4.0   | 0.0   | 6.0   | 0.0  | 4.0   | 0.0  |
| 21UR-136620 | 0.0   | 0.0   | 0.0   | 0.0  | 0.3   | 0.0  |
| 21UR-136630 | 1.0   | 0.0   | 0.0   | 0.0  | 0.0   | 0.0  |
| 21UR-136640 | 0.0   | 0.0   | 0.0   | 0.0  | 0.0   | 0.0  |
| 21UR-136650 | 0.0   | 0.0   | 0.0   | 0.0  | 0.0   | 0.0  |
| 21UR-136660 | 0.0   | 0.0   | 0.0   | 0.0  | 0.0   | 0.0  |
| 21UR-136680 | 0.0   | 0.0   | 1.0   | 0.0  | 0.0   | 0.0  |
| 21UR-136690 | 0.0   | 0.0   | 0.0   | 0.0  | 0.0   | 0.0  |
| 21UR-13670  | 38.0  | 10.0  | 36.0  | 7.0  | 8.0   | 1.0  |
| 21UR-136700 | 0.0   | 0.0   | 0.0   | 0.0  | 0.0   | 0.0  |
| 21UR-136710 | 0.0   | 0.0   | 0.0   | 0.0  | 0.0   | 0.0  |
| 21UR-136730 | 1.0   | 1.0   | 0.0   | 0.0  | 0.0   | 0.0  |
| 21UR-136740 | 0.0   | 0.0   | 0.0   | 0.0  | 0.0   | 0.0  |
| 21UR-136750 | 0.0   | 0.0   | 0.0   | 0.0  | 0.0   | 0.0  |
| 21UR-136760 | 0.0   | 0.0   | 0.0   | 0.0  | 0.0   | 0.0  |
| 21UR-136770 | 0.0   | 0.0   | 0.0   | 0.0  | 0.0   | 0.0  |
| 21UR-136780 | 0.0   | 0.0   | 0.0   | 0.0  | 1.0   | 0.0  |
| 21UR-136790 | 0.0   | 0.5   | 0.0   | 0.0  | 0.0   | 1.0  |
| 21UR-13680  | 0.0   | 0.0   | 0.0   | 0.0  | 0.0   | 0.0  |
| 21UR-136800 | 0.0   | 0.0   | 0.0   | 0.0  | 0.0   | 0.0  |
| 21UR-136810 | 0.0   | 1.0   | 4.0   | 1.0  | 10.0  | 1.0  |
| 21UR-136820 | 0.0   | 0.0   | 0.0   | 0.0  | 0.0   | 1.0  |
| 21UR-136830 | 233.0 | 9.0   | 184.7 | 70.0 | 16.0  | 0.0  |
| 21UR-136840 | 0.0   | 0.0   | 0.0   | 0.0  | 0.0   | 0.0  |
| 21UR-136850 | 0.0   | 0.0   | 0.0   | 0.0  | 1.0   | 0.0  |
| 21UR-136860 | 0.0   | 0.0   | 0.0   | 0.0  | 0.0   | 0.0  |
| 21UR-136870 | 0.0   | 0.1   | 0.0   | 0.0  | 0.0   | 0.0  |
| 21UR-136880 | 0.0   | 0.0   | 0.0   | 0.0  | 0.0   | 0.0  |
| 21UR-136890 | 0.0   | 0.0   | 0.0   | 0.0  | 0.0   | 0.0  |
| 21UR-13690  | 9.0   | 1.0   | 4.0   | 0.0  | 0.0   | 0.0  |
| 21UR-136900 | 0.0   | 0.0   | 0.0   | 1.0  | 1.0   | 0.0  |
| 21UR-136910 | 66.1  | 107.0 | 88.0  | 14.0 | 149.3 | 12.7 |
| 21UR-136920 | 0.0   | 0.0   | 0.0   | 0.0  | 0.0   | 0.0  |
| 21UR-136930 | 0.0   | 0.0   | 0.0   | 0.0  | 0.0   | 0.0  |
| 21UR-136940 | 7.0   | 0.0   | 8.0   | 2.0  | 0.0   | 0.0  |
| 21UR-136950 | 0.0   | 0.1   | 0.0   | 0.0  | 1.0   | 0.1  |
| 21UR-136960 | 0.0   | 0.0   | 0.0   | 0.0  | 0.0   | 0.0  |
| 21UR-136970 | 0.0   | 0.0   | 0.0   | 0.0  | 0.0   | 0.0  |
| 21UR-136980 | 0.0   | 0.0   | 0.0   | 0.0  | 0.0   | 0.0  |
| 21UR-136990 | 0.0   | 0.0   | 0.0   | 0.0  | 4.0   | 0.0  |
| 21UR-1370   | 0.0   | 0.0   | 1.0   | 0.0  | 0.0   | 1.0  |
| 21UR-13700  | 0.0   | 0.0   | 0.0   | 0.0  | 0.0   | 0.0  |
| 21UR-137000 | 1.0   | 0.0   | 1.0   | 1.0  | 0.0   | 0.0  |
| 21UR-137010 | 1.0   | 1.0   | 0.0   | 1.0  | 2.0   | 0.0  |
| 21UR-137020 | 4.0   | 5.0   | 1.0   | 1.0  | 4.0   | 3.0  |
| 21UR-137030 | 0.0   | 0.0   | 0.0   | 0.0  | 0.0   | 0.0  |
| 21UR-137040 | 0.0   | 0.0   | 0.0   | 0.0  | 0.0   | 0.0  |
| 21UR-137050 | 0.0   | 0.0   | 0.0   | 0.0  | 0.0   | 0.0  |
| 21UR-137070 | 0.0   | 0.0   | 1.0   | 0.0  | 0.0   | 0.0  |
| 21UR-137080 | 0.0   | 0.0   | 0.0   | 1.0  | 1.0   | 0.0  |
| 21UR-137090 | 0.0   | 0.0   | 0.0   | 0.0  | 0.0   | 0.0  |

|             |       |      |       |      |      |     |
|-------------|-------|------|-------|------|------|-----|
| 21UR-13710  | 0.0   | 1.0  | 1.0   | 1.0  | 1.0  | 0.0 |
| 21UR-137100 | 0.0   | 0.0  | 0.0   | 0.0  | 0.0  | 0.0 |
| 21UR-137110 | 0.0   | 0.0  | 0.0   | 0.0  | 0.0  | 0.0 |
| 21UR-137120 | 27.0  | 8.0  | 18.0  | 6.0  | 13.0 | 2.0 |
| 21UR-137130 | 0.0   | 0.0  | 0.0   | 0.0  | 0.0  | 0.0 |
| 21UR-137140 | 0.0   | 0.0  | 0.0   | 0.0  | 0.0  | 0.0 |
| 21UR-137150 | 47.0  | 49.7 | 32.0  | 11.0 | 10.0 | 0.0 |
| 21UR-137160 | 3.0   | 12.0 | 4.0   | 1.0  | 24.0 | 0.0 |
| 21UR-137170 | 0.0   | 0.0  | 0.0   | 0.0  | 0.0  | 0.0 |
| 21UR-137180 | 0.0   | 0.0  | 0.0   | 0.0  | 0.0  | 0.0 |
| 21UR-137190 | 0.0   | 0.0  | 0.0   | 0.0  | 0.0  | 0.0 |
| 21UR-13720  | 51.0  | 11.0 | 55.0  | 18.0 | 12.0 | 0.0 |
| 21UR-137200 | 0.0   | 0.0  | 0.0   | 0.0  | 1.0  | 0.0 |
| 21UR-137210 | 99.0  | 16.1 | 75.0  | 37.0 | 6.0  | 2.0 |
| 21UR-137220 | 0.0   | 0.0  | 0.0   | 0.0  | 1.0  | 0.0 |
| 21UR-137230 | 8.0   | 1.0  | 9.0   | 8.0  | 6.5  | 0.0 |
| 21UR-137240 | 0.0   | 0.0  | 0.0   | 0.0  | 0.0  | 0.0 |
| 21UR-137250 | 4.0   | 1.0  | 1.0   | 0.0  | 1.0  | 1.0 |
| 21UR-137260 | 0.0   | 0.0  | 0.0   | 0.0  | 0.0  | 0.0 |
| 21UR-137270 | 1.0   | 1.0  | 6.0   | 0.0  | 1.0  | 0.0 |
| 21UR-137280 | 0.0   | 0.0  | 0.0   | 0.0  | 0.0  | 0.0 |
| 21UR-137290 | 145.0 | 55.0 | 148.0 | 60.0 | 86.0 | 9.0 |
| 21UR-13730  | 0.0   | 3.0  | 1.0   | 3.5  | 0.0  | 0.0 |
| 21UR-137300 | 24.0  | 2.0  | 12.0  | 6.0  | 1.0  | 0.1 |
| 21UR-137310 | 0.0   | 0.0  | 0.0   | 0.0  | 0.0  | 0.0 |
| 21UR-137320 | 0.0   | 0.0  | 0.0   | 0.0  | 0.0  | 0.0 |
| 21UR-137330 | 0.0   | 0.0  | 0.0   | 0.0  | 0.0  | 0.0 |
| 21UR-137340 | 0.0   | 0.0  | 0.0   | 0.0  | 0.0  | 0.0 |
| 21UR-137350 | 0.0   | 0.0  | 0.0   | 0.0  | 0.0  | 0.0 |
| 21UR-137360 | 0.0   | 0.0  | 0.0   | 0.0  | 0.0  | 0.0 |
| 21UR-137370 | 0.0   | 0.0  | 0.0   | 0.0  | 0.0  | 0.0 |
| 21UR-137380 | 0.0   | 0.0  | 1.0   | 0.0  | 0.0  | 0.0 |
| 21UR-137390 | 0.0   | 0.0  | 0.0   | 0.0  | 0.0  | 0.0 |
| 21UR-13740  | 1.0   | 1.1  | 0.0   | 0.0  | 0.0  | 0.0 |
| 21UR-137400 | 5.0   | 1.0  | 2.0   | 1.0  | 1.0  | 0.0 |
| 21UR-137410 | 0.0   | 0.0  | 0.0   | 0.0  | 0.0  | 0.0 |
| 21UR-137420 | 0.0   | 0.0  | 0.0   | 0.0  | 0.0  | 0.0 |
| 21UR-137430 | 0.0   | 0.0  | 0.0   | 0.0  | 1.0  | 1.0 |
| 21UR-137440 | 0.0   | 0.0  | 0.0   | 0.0  | 0.0  | 0.0 |
| 21UR-137450 | 0.0   | 0.0  | 0.0   | 0.0  | 0.0  | 0.0 |
| 21UR-137460 | 4.0   | 2.0  | 3.0   | 0.0  | 8.0  | 1.0 |
| 21UR-137470 | 0.0   | 0.0  | 0.0   | 0.0  | 0.0  | 0.0 |
| 21UR-137480 | 0.0   | 0.0  | 0.0   | 0.0  | 0.0  | 0.0 |
| 21UR-137490 | 0.0   | 0.0  | 0.0   | 0.0  | 0.0  | 0.0 |
| 21UR-13750  | 71.0  | 31.5 | 62.0  | 9.0  | 25.0 | 1.0 |
| 21UR-137500 | 0.0   | 0.0  | 0.0   | 0.0  | 0.0  | 0.0 |
| 21UR-137510 | 0.0   | 0.0  | 1.0   | 0.0  | 1.0  | 0.0 |
| 21UR-137520 | 0.0   | 0.0  | 0.0   | 0.0  | 0.0  | 0.0 |
| 21UR-137530 | 0.0   | 0.0  | 0.0   | 0.0  | 0.0  | 0.0 |
| 21UR-137540 | 0.0   | 0.0  | 0.0   | 1.0  | 0.0  | 0.0 |
| 21UR-137550 | 27.0  | 10.0 | 16.0  | 8.0  | 9.0  | 0.0 |

|             |      |      |      |     |     |     |
|-------------|------|------|------|-----|-----|-----|
| 21UR-137560 | 0.0  | 1.0  | 1.0  | 0.0 | 0.0 | 0.0 |
| 21UR-137570 | 0.0  | 1.0  | 0.0  | 1.0 | 0.0 | 0.0 |
| 21UR-137580 | 0.0  | 0.0  | 0.0  | 0.0 | 0.0 | 0.0 |
| 21UR-137590 | 2.0  | 1.0  | 0.0  | 1.0 | 1.0 | 0.0 |
| 21UR-13760  | 0.0  | 0.0  | 0.0  | 0.0 | 0.0 | 0.0 |
| 21UR-137600 | 0.0  | 0.0  | 0.0  | 0.0 | 0.0 | 0.0 |
| 21UR-137610 | 0.0  | 0.0  | 0.0  | 0.0 | 0.0 | 1.0 |
| 21UR-137620 | 1.0  | 0.0  | 0.0  | 0.0 | 0.0 | 0.0 |
| 21UR-137630 | 0.0  | 0.0  | 0.0  | 0.0 | 0.0 | 0.0 |
| 21UR-137640 | 0.0  | 0.0  | 0.0  | 0.0 | 0.0 | 0.0 |
| 21UR-137650 | 0.0  | 0.0  | 0.0  | 0.0 | 0.0 | 0.0 |
| 21UR-137660 | 1.0  | 5.0  | 0.0  | 1.0 | 1.0 | 0.0 |
| 21UR-137670 | 0.0  | 0.0  | 0.0  | 0.0 | 0.0 | 0.0 |
| 21UR-137680 | 0.0  | 0.0  | 0.0  | 0.0 | 0.0 | 0.0 |
| 21UR-137690 | 0.0  | 0.0  | 0.0  | 0.0 | 0.0 | 0.0 |
| 21UR-13770  | 0.0  | 4.0  | 1.0  | 1.0 | 3.0 | 1.0 |
| 21UR-137700 | 0.0  | 0.0  | 0.0  | 0.0 | 0.0 | 0.0 |
| 21UR-137710 | 0.0  | 0.0  | 0.0  | 0.0 | 0.0 | 0.0 |
| 21UR-137720 | 0.0  | 0.0  | 0.0  | 0.0 | 0.0 | 0.0 |
| 21UR-137730 | 32.0 | 8.0  | 21.0 | 2.0 | 9.0 | 4.0 |
| 21UR-137740 | 0.0  | 0.0  | 0.0  | 0.0 | 0.0 | 0.0 |
| 21UR-137750 | 0.0  | 0.0  | 0.0  | 0.0 | 0.0 | 0.0 |
| 21UR-137760 | 0.0  | 6.0  | 0.0  | 0.0 | 3.5 | 0.0 |
| 21UR-137770 | 2.0  | 0.0  | 2.0  | 0.0 | 0.0 | 1.0 |
| 21UR-137780 | 4.0  | 0.0  | 1.0  | 0.0 | 0.0 | 0.0 |
| 21UR-137790 | 0.0  | 0.0  | 0.0  | 0.0 | 0.0 | 0.0 |
| 21UR-13780  | 1.0  | 13.2 | 1.0  | 0.0 | 1.0 | 0.0 |
| 21UR-137800 | 0.0  | 0.0  | 0.0  | 0.0 | 0.0 | 0.0 |
| 21UR-137810 | 0.0  | 0.0  | 0.0  | 0.0 | 0.0 | 0.0 |
| 21UR-137820 | 0.0  | 0.0  | 0.0  | 0.0 | 0.0 | 0.0 |
| 21UR-137830 | 0.0  | 1.0  | 0.0  | 0.0 | 0.0 | 0.0 |
| 21UR-137840 | 0.0  | 0.0  | 0.0  | 0.0 | 0.0 | 0.0 |
| 21UR-137850 | 0.0  | 0.0  | 0.0  | 0.0 | 0.0 | 0.0 |
| 21UR-137860 | 0.0  | 0.0  | 0.0  | 0.0 | 0.0 | 0.0 |
| 21UR-137870 | 0.0  | 0.0  | 0.0  | 0.0 | 0.0 | 0.0 |
| 21UR-137880 | 0.0  | 0.0  | 0.0  | 0.0 | 0.0 | 0.0 |
| 21UR-137890 | 0.0  | 0.0  | 0.0  | 0.0 | 0.0 | 0.0 |
| 21UR-13790  | 0.0  | 0.0  | 0.0  | 1.0 | 1.0 | 0.0 |
| 21UR-137900 | 0.0  | 0.0  | 0.0  | 0.0 | 0.0 | 0.0 |
| 21UR-137910 | 0.0  | 1.0  | 0.0  | 0.0 | 1.0 | 0.0 |
| 21UR-137920 | 0.0  | 0.0  | 0.0  | 0.0 | 0.0 | 0.0 |
| 21UR-137930 | 0.0  | 0.0  | 0.0  | 0.0 | 0.0 | 1.0 |
| 21UR-137940 | 0.0  | 0.0  | 0.0  | 0.0 | 0.0 | 0.0 |
| 21UR-137950 | 0.0  | 0.0  | 0.0  | 0.0 | 0.0 | 0.0 |
| 21UR-137960 | 3.5  | 1.0  | 0.0  | 0.0 | 0.0 | 0.0 |
| 21UR-137970 | 0.0  | 0.0  | 0.0  | 0.0 | 0.0 | 0.0 |
| 21UR-137980 | 0.0  | 0.0  | 0.0  | 0.0 | 0.0 | 0.0 |
| 21UR-137990 | 1.0  | 1.0  | 0.0  | 0.0 | 0.0 | 0.0 |
| 21UR-1380   | 20.0 | 4.0  | 16.0 | 6.0 | 3.0 | 0.0 |
| 21UR-13800  | 1.0  | 0.1  | 5.0  | 1.0 | 1.0 | 1.0 |
| 21UR-138000 | 0.0  | 0.0  | 0.0  | 0.0 | 0.0 | 0.0 |

|             |       |      |       |      |      |     |
|-------------|-------|------|-------|------|------|-----|
| 21UR-138010 | 0.0   | 0.0  | 0.0   | 0.0  | 0.0  | 0.0 |
| 21UR-138020 | 0.0   | 1.0  | 0.0   | 0.0  | 0.0  | 0.0 |
| 21UR-138030 | 0.0   | 0.0  | 0.0   | 0.0  | 0.0  | 0.0 |
| 21UR-138040 | 0.0   | 0.1  | 0.1   | 0.0  | 0.0  | 0.0 |
| 21UR-138050 | 2.0   | 0.0  | 3.0   | 2.0  | 4.0  | 0.0 |
| 21UR-138060 | 0.0   | 1.0  | 0.0   | 0.0  | 0.0  | 0.0 |
| 21UR-138070 | 0.0   | 0.0  | 0.0   | 0.0  | 0.0  | 0.0 |
| 21UR-138080 | 0.0   | 0.0  | 0.0   | 0.0  | 0.0  | 0.0 |
| 21UR-138090 | 0.0   | 0.0  | 0.0   | 0.0  | 0.0  | 0.0 |
| 21UR-13810  | 0.0   | 0.0  | 0.0   | 0.0  | 0.0  | 1.0 |
| 21UR-138100 | 0.0   | 0.0  | 0.0   | 0.0  | 1.0  | 0.0 |
| 21UR-138110 | 0.0   | 0.0  | 0.0   | 0.0  | 0.0  | 0.0 |
| 21UR-138120 | 0.0   | 0.0  | 0.0   | 0.0  | 0.0  | 0.0 |
| 21UR-138130 | 0.0   | 0.0  | 0.0   | 0.0  | 0.0  | 0.0 |
| 21UR-138140 | 1.0   | 0.0  | 0.0   | 0.0  | 1.0  | 1.0 |
| 21UR-138150 | 0.0   | 0.0  | 0.0   | 0.0  | 0.0  | 0.0 |
| 21UR-138160 | 0.0   | 0.0  | 0.0   | 0.0  | 0.0  | 0.0 |
| 21UR-138170 | 0.0   | 0.0  | 0.0   | 0.0  | 0.0  | 0.0 |
| 21UR-138180 | 0.0   | 0.0  | 0.0   | 0.0  | 0.0  | 0.0 |
| 21UR-138190 | 0.0   | 0.0  | 0.0   | 0.0  | 0.0  | 0.0 |
| 21UR-13820  | 0.0   | 0.0  | 0.0   | 0.0  | 0.0  | 0.0 |
| 21UR-138200 | 0.0   | 0.0  | 0.0   | 0.0  | 0.0  | 0.0 |
| 21UR-138210 | 120.5 | 24.2 | 165.5 | 47.0 | 13.0 | 2.0 |
| 21UR-138220 | 2.0   | 1.0  | 4.0   | 1.0  | 1.0  | 0.0 |
| 21UR-138230 | 0.0   | 0.0  | 0.0   | 0.0  | 0.0  | 0.0 |
| 21UR-138240 | 0.0   | 0.0  | 0.0   | 0.0  | 0.0  | 0.0 |
| 21UR-138250 | 0.0   | 0.0  | 0.0   | 0.0  | 0.0  | 0.0 |
| 21UR-138260 | 0.0   | 0.0  | 0.0   | 0.0  | 0.0  | 0.0 |
| 21UR-138270 | 0.0   | 0.0  | 0.0   | 0.0  | 0.0  | 0.0 |
| 21UR-138280 | 0.0   | 0.0  | 0.0   | 0.0  | 0.0  | 0.0 |
| 21UR-138290 | 0.0   | 0.0  | 0.0   | 0.0  | 0.0  | 0.0 |
| 21UR-13830  | 1.0   | 0.0  | 0.0   | 0.0  | 6.0  | 1.0 |
| 21UR-138300 | 0.0   | 0.0  | 0.0   | 0.0  | 0.0  | 0.0 |
| 21UR-138310 | 0.0   | 0.0  | 0.0   | 0.0  | 0.0  | 0.0 |
| 21UR-138320 | 0.0   | 0.0  | 0.0   | 0.0  | 0.0  | 0.0 |
| 21UR-138330 | 1.0   | 1.0  | 0.0   | 0.0  | 1.0  | 0.0 |
| 21UR-138340 | 0.0   | 0.0  | 0.0   | 0.0  | 0.0  | 0.0 |
| 21UR-138350 | 0.0   | 0.0  | 0.0   | 0.0  | 0.0  | 0.0 |
| 21UR-138360 | 0.0   | 0.0  | 0.0   | 0.0  | 0.0  | 0.0 |
| 21UR-138370 | 0.0   | 0.0  | 0.0   | 0.0  | 0.0  | 0.0 |
| 21UR-138380 | 0.0   | 0.0  | 0.0   | 0.0  | 2.0  | 0.0 |
| 21UR-138390 | 0.0   | 0.0  | 0.0   | 0.0  | 1.0  | 0.0 |
| 21UR-13840  | 8.0   | 0.0  | 1.0   | 1.0  | 0.0  | 0.0 |
| 21UR-138400 | 0.0   | 0.0  | 1.0   | 0.0  | 0.0  | 0.0 |
| 21UR-138410 | 0.0   | 1.0  | 1.0   | 0.0  | 0.0  | 0.0 |
| 21UR-138420 | 0.0   | 0.0  | 0.0   | 0.0  | 0.0  | 0.0 |
| 21UR-138430 | 0.0   | 0.0  | 0.0   | 0.0  | 1.0  | 0.0 |
| 21UR-138440 | 1.0   | 0.0  | 2.0   | 0.0  | 3.0  | 0.0 |
| 21UR-138450 | 0.0   | 0.0  | 0.0   | 0.0  | 0.0  | 0.0 |
| 21UR-138460 | 0.0   | 0.0  | 0.0   | 0.0  | 0.0  | 0.0 |
| 21UR-138470 | 0.0   | 0.0  | 0.0   | 0.0  | 0.0  | 0.0 |

|             |       |       |       |      |      |      |
|-------------|-------|-------|-------|------|------|------|
| 21UR-138480 | 0.0   | 0.0   | 0.0   | 0.0  | 0.0  | 0.0  |
| 21UR-138490 | 0.0   | 0.0   | 0.0   | 0.0  | 0.0  | 0.0  |
| 21UR-13850  | 1.0   | 0.0   | 0.0   | 0.0  | 0.0  | 0.0  |
| 21UR-138500 | 0.0   | 0.0   | 0.0   | 0.0  | 0.0  | 0.0  |
| 21UR-138510 | 0.0   | 0.0   | 0.0   | 0.0  | 0.0  | 0.0  |
| 21UR-138520 | 0.0   | 0.0   | 0.0   | 0.0  | 0.0  | 0.0  |
| 21UR-138530 | 0.0   | 1.0   | 0.0   | 0.0  | 0.0  | 0.0  |
| 21UR-138540 | 0.0   | 0.0   | 0.0   | 0.0  | 0.0  | 0.0  |
| 21UR-138550 | 0.0   | 0.0   | 0.0   | 0.0  | 0.0  | 0.0  |
| 21UR-138560 | 2.0   | 1.0   | 5.0   | 1.0  | 1.0  | 0.0  |
| 21UR-138570 | 0.0   | 0.0   | 0.0   | 0.0  | 0.0  | 0.0  |
| 21UR-138580 | 0.0   | 0.0   | 0.0   | 0.0  | 0.0  | 0.0  |
| 21UR-138590 | 0.0   | 0.0   | 0.0   | 0.0  | 0.0  | 0.0  |
| 21UR-138600 | 0.0   | 0.0   | 0.0   | 0.0  | 0.0  | 0.0  |
| 21UR-138610 | 0.0   | 0.0   | 0.0   | 0.0  | 1.0  | 0.0  |
| 21UR-138620 | 0.0   | 0.0   | 0.0   | 0.0  | 0.1  | 0.0  |
| 21UR-138630 | 0.0   | 0.0   | 0.0   | 0.0  | 0.0  | 0.0  |
| 21UR-138640 | 5.0   | 1.0   | 4.0   | 4.0  | 1.0  | 0.0  |
| 21UR-138650 | 8.5   | 0.0   | 10.5  | 1.3  | 6.0  | 2.0  |
| 21UR-138660 | 0.0   | 0.0   | 0.0   | 0.0  | 0.0  | 0.0  |
| 21UR-138670 | 0.0   | 1.0   | 0.0   | 0.0  | 0.0  | 0.0  |
| 21UR-138680 | 3.0   | 2.0   | 5.0   | 0.0  | 5.0  | 0.0  |
| 21UR-138690 | 0.0   | 0.0   | 0.0   | 0.0  | 0.0  | 0.0  |
| 21UR-13870  | 0.0   | 0.0   | 0.0   | 0.0  | 0.0  | 0.0  |
| 21UR-138700 | 0.0   | 0.0   | 0.0   | 0.0  | 0.0  | 0.0  |
| 21UR-138710 | 0.0   | 0.0   | 0.0   | 0.0  | 0.0  | 0.0  |
| 21UR-138720 | 0.0   | 0.0   | 0.0   | 0.0  | 0.0  | 0.0  |
| 21UR-138730 | 0.0   | 0.0   | 0.0   | 0.0  | 0.0  | 0.0  |
| 21UR-138740 | 0.0   | 0.0   | 0.0   | 0.0  | 0.0  | 0.0  |
| 21UR-138750 | 0.0   | 0.1   | 0.0   | 0.0  | 0.0  | 0.0  |
| 21UR-138760 | 0.0   | 0.0   | 0.0   | 0.0  | 0.0  | 0.0  |
| 21UR-138770 | 0.0   | 0.0   | 0.0   | 0.0  | 0.0  | 0.0  |
| 21UR-138780 | 0.0   | 0.0   | 0.0   | 0.0  | 0.0  | 0.0  |
| 21UR-138790 | 0.0   | 0.0   | 2.0   | 0.0  | 0.0  | 0.0  |
| 21UR-13880  | 269.0 | 125.0 | 138.0 | 66.0 | 51.3 | 13.0 |
| 21UR-138800 | 0.0   | 0.0   | 0.0   | 0.0  | 1.0  | 0.0  |
| 21UR-138810 | 0.0   | 0.0   | 0.0   | 0.0  | 0.0  | 0.0  |
| 21UR-138820 | 0.0   | 0.0   | 0.0   | 0.0  | 0.0  | 0.0  |
| 21UR-138830 | 0.0   | 0.0   | 0.0   | 0.0  | 0.0  | 0.0  |
| 21UR-138840 | 0.0   | 0.0   | 0.0   | 0.0  | 0.0  | 0.0  |
| 21UR-138850 | 0.0   | 0.0   | 0.0   | 0.0  | 0.0  | 0.0  |
| 21UR-138860 | 0.0   | 0.0   | 0.0   | 0.0  | 0.0  | 0.0  |
| 21UR-138870 | 0.0   | 0.0   | 0.0   | 0.0  | 1.0  | 0.0  |
| 21UR-138880 | 1.0   | 1.0   | 0.0   | 0.0  | 1.0  | 0.0  |
| 21UR-138890 | 0.0   | 0.0   | 0.0   | 0.0  | 0.0  | 0.0  |
| 21UR-13890  | 0.0   | 16.0  | 1.0   | 0.0  | 6.0  | 0.0  |
| 21UR-138900 | 0.0   | 0.0   | 0.0   | 0.0  | 0.0  | 0.0  |
| 21UR-138910 | 0.0   | 2.0   | 0.0   | 0.0  | 0.0  | 0.0  |
| 21UR-138920 | 1.0   | 0.0   | 0.0   | 0.0  | 1.0  | 0.0  |
| 21UR-138930 | 0.0   | 0.0   | 0.0   | 0.0  | 0.0  | 0.0  |
| 21UR-138940 | 0.0   | 0.0   | 0.0   | 0.0  | 0.0  | 0.0  |

|             |      |      |      |      |      |     |
|-------------|------|------|------|------|------|-----|
| 21UR-138950 | 3.0  | 2.0  | 2.0  | 0.0  | 11.0 | 0.0 |
| 21UR-138960 | 0.0  | 0.0  | 0.0  | 0.0  | 0.0  | 0.0 |
| 21UR-138970 | 2.0  | 0.0  | 1.0  | 0.0  | 0.0  | 0.0 |
| 21UR-138980 | 1.0  | 0.0  | 0.0  | 0.0  | 0.0  | 0.0 |
| 21UR-138990 | 0.0  | 0.0  | 0.0  | 0.0  | 1.0  | 0.0 |
| 21UR-13900  | 0.0  | 1.0  | 8.0  | 0.0  | 1.0  | 0.0 |
| 21UR-139000 | 0.0  | 0.0  | 0.0  | 0.0  | 0.0  | 0.0 |
| 21UR-139010 | 0.0  | 0.0  | 0.0  | 0.0  | 1.0  | 0.0 |
| 21UR-139020 | 0.0  | 0.0  | 0.0  | 0.0  | 0.0  | 0.0 |
| 21UR-139030 | 0.0  | 0.0  | 0.0  | 0.0  | 0.0  | 0.0 |
| 21UR-139040 | 0.0  | 0.0  | 0.0  | 0.0  | 0.0  | 0.0 |
| 21UR-139050 | 0.0  | 1.0  | 0.0  | 0.0  | 0.0  | 0.0 |
| 21UR-139060 | 0.0  | 0.0  | 0.0  | 0.0  | 0.0  | 0.0 |
| 21UR-139070 | 0.0  | 0.0  | 0.0  | 0.0  | 0.0  | 0.0 |
| 21UR-139080 | 0.0  | 0.0  | 0.0  | 0.0  | 0.0  | 0.0 |
| 21UR-139090 | 0.0  | 0.0  | 0.0  | 0.0  | 0.0  | 0.0 |
| 21UR-13910  | 41.0 | 15.3 | 26.0 | 12.0 | 4.0  | 3.0 |
| 21UR-139100 | 0.0  | 0.0  | 0.0  | 0.0  | 0.0  | 0.0 |
| 21UR-139110 | 0.0  | 0.0  | 0.0  | 0.0  | 0.0  | 0.0 |
| 21UR-139120 | 1.2  | 0.0  | 5.0  | 1.3  | 2.0  | 0.0 |
| 21UR-139130 | 0.0  | 0.0  | 0.0  | 0.0  | 0.0  | 0.0 |
| 21UR-139140 | 1.0  | 0.0  | 1.0  | 0.0  | 2.0  | 0.0 |
| 21UR-139150 | 1.0  | 0.0  | 1.0  | 0.0  | 0.0  | 0.0 |
| 21UR-139160 | 0.0  | 0.0  | 0.0  | 4.0  | 0.0  | 0.0 |
| 21UR-139170 | 0.0  | 0.0  | 0.0  | 0.0  | 0.0  | 0.0 |
| 21UR-139180 | 12.0 | 2.3  | 8.0  | 4.0  | 3.0  | 0.0 |
| 21UR-139190 | 0.0  | 0.0  | 0.0  | 0.0  | 0.0  | 0.0 |
| 21UR-13920  | 1.0  | 0.0  | 0.0  | 0.0  | 0.0  | 0.0 |
| 21UR-139200 | 0.0  | 0.0  | 0.0  | 0.0  | 0.0  | 0.0 |
| 21UR-139210 | 0.0  | 0.0  | 0.0  | 0.0  | 0.0  | 0.0 |
| 21UR-139220 | 0.0  | 0.0  | 0.0  | 0.0  | 0.0  | 0.0 |
| 21UR-139230 | 2.0  | 0.0  | 0.0  | 0.0  | 1.0  | 0.0 |
| 21UR-139240 | 1.0  | 1.0  | 0.0  | 1.0  | 0.0  | 0.0 |
| 21UR-139250 | 0.0  | 0.0  | 0.0  | 0.0  | 0.0  | 0.0 |
| 21UR-139260 | 0.0  | 0.0  | 0.0  | 0.0  | 2.0  | 0.0 |
| 21UR-139270 | 0.0  | 0.0  | 0.0  | 0.0  | 0.0  | 0.0 |
| 21UR-139280 | 1.0  | 24.0 | 0.0  | 0.0  | 1.0  | 1.0 |
| 21UR-139290 | 0.0  | 0.1  | 0.0  | 0.0  | 0.0  | 0.0 |
| 21UR-13930  | 1.0  | 0.0  | 0.0  | 0.0  | 0.0  | 0.0 |
| 21UR-139300 | 0.0  | 0.0  | 0.0  | 0.0  | 1.0  | 0.0 |
| 21UR-139310 | 1.0  | 0.0  | 0.0  | 0.0  | 1.0  | 0.0 |
| 21UR-139320 | 0.0  | 0.0  | 0.0  | 0.0  | 0.0  | 0.0 |
| 21UR-139330 | 0.0  | 0.0  | 0.0  | 0.0  | 0.0  | 0.0 |
| 21UR-139340 | 0.0  | 0.0  | 0.0  | 0.0  | 0.0  | 0.0 |
| 21UR-139350 | 1.0  | 0.0  | 1.0  | 0.0  | 0.0  | 0.0 |
| 21UR-139360 | 0.0  | 5.0  | 2.0  | 0.0  | 1.0  | 0.0 |
| 21UR-139370 | 0.0  | 0.0  | 0.0  | 0.0  | 0.0  | 0.0 |
| 21UR-139380 | 2.0  | 6.0  | 6.0  | 1.0  | 8.0  | 1.0 |
| 21UR-139390 | 0.0  | 0.0  | 0.0  | 0.0  | 0.0  | 0.0 |
| 21UR-13940  | 0.0  | 1.0  | 3.0  | 0.0  | 0.0  | 0.0 |
| 21UR-139400 | 2.0  | 2.0  | 2.0  | 0.0  | 0.0  | 0.0 |



|             |       |      |       |       |       |     |
|-------------|-------|------|-------|-------|-------|-----|
| 21UR-139410 | 0.0   | 0.0  | 0.0   | 0.0   | 0.0   | 0.0 |
| 21UR-139420 | 31.0  | 21.0 | 31.0  | 8.0   | 44.0  | 3.0 |
| 21UR-139430 | 381.5 | 49.0 | 251.0 | 185.0 | 114.5 | 3.0 |
| 21UR-139440 | 0.0   | 0.0  | 0.0   | 0.0   | 0.0   | 0.0 |
| 21UR-139450 | 0.0   | 0.0  | 0.0   | 0.0   | 0.0   | 0.0 |
| 21UR-139460 | 0.0   | 0.0  | 0.0   | 0.0   | 0.0   | 0.0 |
| 21UR-139470 | 0.0   | 0.0  | 0.0   | 0.0   | 0.0   | 0.0 |
| 21UR-139480 | 0.0   | 0.0  | 0.0   | 0.0   | 0.0   | 0.0 |
| 21UR-139490 | 0.0   | 0.0  | 1.0   | 0.0   | 0.0   | 0.0 |
| 21UR-13950  | 0.0   | 0.0  | 0.0   | 0.0   | 0.0   | 0.0 |
| 21UR-139500 | 2.0   | 0.0  | 4.0   | 0.0   | 1.0   | 0.0 |
| 21UR-139510 | 0.0   | 0.0  | 0.0   | 0.0   | 0.0   | 0.0 |
| 21UR-139520 | 0.0   | 0.0  | 0.0   | 0.0   | 1.0   | 0.0 |
| 21UR-139530 | 0.0   | 0.0  | 0.0   | 0.0   | 1.0   | 0.0 |
| 21UR-139540 | 0.0   | 0.0  | 0.0   | 0.0   | 0.0   | 0.0 |
| 21UR-139550 | 0.0   | 0.0  | 0.0   | 0.0   | 0.0   | 0.0 |
| 21UR-139560 | 0.0   | 0.0  | 0.0   | 0.0   | 0.0   | 0.0 |
| 21UR-139570 | 0.0   | 0.0  | 0.0   | 0.0   | 0.0   | 0.0 |
| 21UR-139580 | 0.0   | 0.0  | 0.0   | 0.0   | 0.0   | 0.0 |
| 21UR-139590 | 0.0   | 0.0  | 0.0   | 0.0   | 0.0   | 0.0 |
| 21UR-13960  | 0.0   | 4.0  | 4.0   | 0.0   | 1.0   | 1.0 |
| 21UR-139600 | 1.0   | 3.0  | 1.0   | 0.0   | 0.0   | 0.0 |
| 21UR-139610 | 0.0   | 0.0  | 0.0   | 0.0   | 0.0   | 0.0 |
| 21UR-139620 | 0.0   | 0.0  | 0.0   | 0.0   | 0.0   | 0.0 |
| 21UR-139630 | 3.5   | 1.0  | 1.0   | 1.0   | 1.0   | 0.0 |
| 21UR-139640 | 2.0   | 0.0  | 0.0   | 0.0   | 0.0   | 0.0 |
| 21UR-139650 | 0.0   | 1.0  | 0.0   | 0.0   | 0.0   | 0.0 |
| 21UR-139660 | 1.0   | 1.0  | 0.0   | 0.0   | 2.0   | 1.0 |
| 21UR-139670 | 4.0   | 1.0  | 1.0   | 1.0   | 1.0   | 0.0 |
| 21UR-139680 | 2.0   | 0.5  | 2.0   | 0.0   | 0.0   | 0.0 |
| 21UR-139690 | 4.0   | 2.0  | 11.0  | 2.0   | 9.0   | 0.0 |
| 21UR-13970  | 0.0   | 0.0  | 0.0   | 0.0   | 0.0   | 0.0 |
| 21UR-139700 | 0.0   | 0.0  | 0.0   | 0.0   | 0.0   | 0.0 |
| 21UR-139710 | 0.0   | 0.0  | 0.0   | 0.0   | 1.0   | 0.0 |
| 21UR-139720 | 0.0   | 2.0  | 0.0   | 0.0   | 2.0   | 0.0 |
| 21UR-139730 | 0.0   | 0.0  | 0.0   | 0.0   | 0.0   | 0.0 |
| 21UR-139740 | 0.0   | 0.0  | 0.0   | 0.0   | 0.0   | 0.0 |
| 21UR-139750 | 0.0   | 0.0  | 0.0   | 0.0   | 0.0   | 0.0 |
| 21UR-139760 | 0.0   | 0.0  | 0.0   | 0.0   | 0.0   | 0.0 |
| 21UR-139770 | 0.0   | 0.0  | 0.0   | 0.0   | 0.0   | 0.0 |
| 21UR-139780 | 0.0   | 0.0  | 0.0   | 0.0   | 0.0   | 0.0 |
| 21UR-139790 | 0.0   | 0.0  | 0.0   | 0.0   | 0.0   | 0.0 |
| 21UR-13980  | 0.0   | 0.0  | 3.0   | 1.0   | 1.0   | 0.0 |
| 21UR-139800 | 0.0   | 1.0  | 0.0   | 0.0   | 1.0   | 0.0 |
| 21UR-139810 | 0.0   | 0.0  | 0.0   | 0.0   | 0.0   | 0.0 |
| 21UR-139820 | 0.0   | 0.0  | 0.0   | 0.0   | 0.0   | 0.0 |
| 21UR-139830 | 0.0   | 0.0  | 0.0   | 0.0   | 0.0   | 0.0 |
| 21UR-139840 | 3.0   | 0.0  | 2.0   | 0.0   | 1.0   | 0.0 |
| 21UR-139850 | 0.0   | 0.0  | 0.0   | 0.0   | 0.0   | 0.0 |
| 21UR-139860 | 1.0   | 1.0  | 0.0   | 0.0   | 0.0   | 0.0 |
| 21UR-139870 | 2.0   | 2.0  | 0.0   | 0.0   | 0.0   | 0.0 |

|             |       |      |       |      |      |     |
|-------------|-------|------|-------|------|------|-----|
| 21UR-139880 | 0.0   | 0.0  | 0.0   | 0.0  | 0.0  | 0.0 |
| 21UR-139890 | 6.0   | 1.0  | 4.0   | 0.0  | 1.0  | 0.0 |
| 21UR-13990  | 1.0   | 1.0  | 1.0   | 0.0  | 4.0  | 0.0 |
| 21UR-139900 | 1.0   | 4.0  | 4.0   | 0.0  | 0.0  | 0.0 |
| 21UR-139910 | 12.0  | 4.0  | 5.0   | 3.0  | 7.0  | 0.0 |
| 21UR-139920 | 0.0   | 0.0  | 0.0   | 0.0  | 0.0  | 0.0 |
| 21UR-139930 | 0.0   | 0.0  | 0.0   | 0.0  | 0.0  | 0.0 |
| 21UR-139940 | 0.0   | 0.0  | 0.0   | 0.0  | 0.0  | 0.0 |
| 21UR-139950 | 231.0 | 4.0  | 211.0 | 28.0 | 9.0  | 2.0 |
| 21UR-139960 | 0.0   | 3.1  | 0.0   | 1.0  | 0.0  | 0.0 |
| 21UR-139970 | 0.0   | 0.0  | 0.0   | 0.0  | 0.0  | 0.0 |
| 21UR-139980 | 0.0   | 0.0  | 0.0   | 0.0  | 0.0  | 0.0 |
| 21UR-139990 | 0.0   | 0.0  | 0.0   | 0.0  | 0.0  | 0.0 |
| 21UR-140    | 1.0   | 0.0  | 1.0   | 0.0  | 2.0  | 1.0 |
| 21UR-1400   | 3.0   | 1.0  | 6.0   | 1.0  | 4.0  | 2.0 |
| 21UR-140000 | 0.0   | 0.0  | 0.0   | 0.0  | 0.0  | 0.0 |
| 21UR-140010 | 0.0   | 0.0  | 0.0   | 0.0  | 0.0  | 0.0 |
| 21UR-140020 | 0.0   | 0.0  | 0.0   | 0.0  | 0.0  | 0.0 |
| 21UR-140030 | 0.0   | 0.0  | 0.0   | 0.0  | 0.0  | 0.0 |
| 21UR-140040 | 4.0   | 0.0  | 5.0   | 1.0  | 1.0  | 0.0 |
| 21UR-140050 | 0.0   | 0.0  | 0.0   | 0.0  | 0.0  | 0.0 |
| 21UR-140060 | 0.0   | 0.0  | 0.0   | 0.0  | 0.0  | 0.0 |
| 21UR-140070 | 8.5   | 3.0  | 4.5   | 3.0  | 7.0  | 1.0 |
| 21UR-140080 | 0.0   | 0.0  | 0.0   | 0.0  | 1.0  | 0.0 |
| 21UR-140090 | 0.0   | 0.0  | 0.0   | 0.0  | 0.0  | 0.0 |
| 21UR-14010  | 0.0   | 0.0  | 0.0   | 0.0  | 0.0  | 0.0 |
| 21UR-140100 | 0.0   | 0.0  | 0.0   | 0.0  | 0.0  | 0.0 |
| 21UR-140110 | 0.0   | 0.0  | 0.0   | 0.0  | 0.0  | 0.0 |
| 21UR-140120 | 0.0   | 0.0  | 1.0   | 0.0  | 0.0  | 0.0 |
| 21UR-140130 | 0.0   | 0.0  | 0.0   | 1.0  | 0.0  | 0.0 |
| 21UR-140140 | 0.0   | 0.0  | 2.0   | 1.0  | 2.2  | 0.0 |
| 21UR-140150 | 0.0   | 0.0  | 0.0   | 1.0  | 0.0  | 1.0 |
| 21UR-140160 | 0.0   | 0.0  | 0.0   | 0.0  | 0.0  | 0.0 |
| 21UR-140170 | 0.0   | 0.0  | 0.0   | 0.0  | 0.0  | 0.0 |
| 21UR-140180 | 11.0  | 9.0  | 18.0  | 3.0  | 35.0 | 1.0 |
| 21UR-140190 | 0.0   | 3.0  | 0.0   | 0.0  | 0.0  | 0.0 |
| 21UR-14020  | 89.1  | 16.0 | 75.0  | 49.0 | 15.0 | 0.0 |
| 21UR-140200 | 0.0   | 0.0  | 0.0   | 0.0  | 0.0  | 0.0 |
| 21UR-140210 | 0.0   | 0.0  | 0.0   | 0.0  | 0.0  | 0.0 |
| 21UR-140220 | 0.0   | 0.0  | 0.0   | 0.0  | 0.0  | 0.0 |
| 21UR-140230 | 0.0   | 0.0  | 0.0   | 0.0  | 0.0  | 0.0 |
| 21UR-140240 | 0.0   | 0.0  | 0.0   | 0.0  | 0.0  | 0.0 |
| 21UR-140250 | 0.0   | 0.0  | 0.0   | 0.0  | 0.0  | 0.0 |
| 21UR-140260 | 0.0   | 0.0  | 0.0   | 0.0  | 0.0  | 0.0 |
| 21UR-140270 | 8.0   | 0.0  | 8.0   | 2.0  | 0.0  | 0.0 |
| 21UR-140280 | 0.0   | 0.0  | 0.0   | 0.0  | 0.0  | 0.0 |
| 21UR-140290 | 0.0   | 0.0  | 0.0   | 0.0  | 0.0  | 0.0 |
| 21UR-14030  | 0.0   | 0.0  | 0.0   | 0.0  | 0.0  | 0.0 |
| 21UR-140300 | 0.0   | 0.0  | 1.0   | 0.0  | 0.0  | 0.0 |
| 21UR-140310 | 0.0   | 0.0  | 0.0   | 0.0  | 0.0  | 0.0 |
| 21UR-140320 | 0.0   | 0.0  | 0.0   | 0.0  | 0.0  | 0.0 |

|             |       |       |       |       |       |      |
|-------------|-------|-------|-------|-------|-------|------|
| 21UR-140330 | 2.0   | 1.0   | 2.0   | 0.0   | 1.0   | 0.0  |
| 21UR-140340 | 1.0   | 3.0   | 1.0   | 1.0   | 5.0   | 1.0  |
| 21UR-140350 | 0.0   | 0.0   | 0.0   | 0.0   | 0.0   | 0.0  |
| 21UR-140360 | 4.0   | 0.0   | 1.0   | 1.0   | 0.0   | 0.0  |
| 21UR-140370 | 1.0   | 1.0   | 0.0   | 0.0   | 2.0   | 1.0  |
| 21UR-140380 | 4.0   | 0.0   | 8.0   | 0.0   | 0.0   | 0.0  |
| 21UR-140390 | 1.0   | 5.0   | 0.0   | 0.0   | 0.0   | 2.0  |
| 21UR-14040  | 505.0 | 146.0 | 372.5 | 292.0 | 101.5 | 10.0 |
| 21UR-140400 | 0.0   | 0.0   | 0.0   | 0.0   | 0.0   | 0.0  |
| 21UR-140410 | 0.0   | 0.0   | 0.0   | 0.0   | 0.0   | 0.0  |
| 21UR-140420 | 0.0   | 0.0   | 0.0   | 0.0   | 0.0   | 0.0  |
| 21UR-140430 | 0.0   | 0.0   | 0.0   | 0.0   | 0.0   | 0.0  |
| 21UR-140440 | 0.0   | 0.0   | 0.0   | 0.0   | 0.0   | 0.0  |
| 21UR-140450 | 0.0   | 0.0   | 0.0   | 0.0   | 0.0   | 0.0  |
| 21UR-140460 | 0.0   | 0.0   | 0.0   | 0.0   | 1.0   | 0.0  |
| 21UR-140470 | 7.0   | 5.0   | 11.0  | 4.0   | 1.0   | 2.0  |
| 21UR-140480 | 1.0   | 3.0   | 0.0   | 0.0   | 1.0   | 0.0  |
| 21UR-140490 | 4.0   | 0.0   | 3.0   | 1.0   | 2.0   | 0.0  |
| 21UR-14050  | 74.0  | 84.0  | 32.0  | 9.0   | 52.0  | 22.0 |
| 21UR-140500 | 0.0   | 0.0   | 0.0   | 0.0   | 0.0   | 0.0  |
| 21UR-140510 | 1.0   | 0.0   | 1.0   | 2.0   | 0.0   | 1.0  |
| 21UR-140520 | 0.0   | 0.0   | 0.0   | 0.0   | 0.0   | 0.0  |
| 21UR-140530 | 0.0   | 0.0   | 0.0   | 0.0   | 0.0   | 0.0  |
| 21UR-140540 | 0.0   | 0.0   | 0.0   | 0.0   | 0.0   | 0.0  |
| 21UR-140550 | 0.0   | 0.0   | 0.0   | 0.0   | 0.0   | 0.0  |
| 21UR-140560 | 0.0   | 0.0   | 0.0   | 0.0   | 0.0   | 0.0  |
| 21UR-140570 | 0.0   | 0.0   | 0.0   | 0.0   | 0.0   | 0.0  |
| 21UR-140580 | 0.0   | 0.0   | 0.0   | 0.0   | 0.0   | 0.0  |
| 21UR-140590 | 0.0   | 0.0   | 0.0   | 0.0   | 0.0   | 1.0  |
| 21UR-14060  | 1.0   | 1.0   | 0.0   | 0.0   | 1.0   | 0.0  |
| 21UR-140600 | 0.0   | 0.0   | 0.0   | 0.0   | 0.0   | 0.0  |
| 21UR-140610 | 0.0   | 0.0   | 0.0   | 0.0   | 0.0   | 0.0  |
| 21UR-140620 | 11.0  | 0.0   | 1.0   | 1.0   | 1.0   | 0.0  |
| 21UR-140630 | 0.0   | 0.0   | 0.0   | 0.0   | 0.0   | 0.0  |
| 21UR-140640 | 0.0   | 0.0   | 0.0   | 0.0   | 0.0   | 0.0  |
| 21UR-140650 | 0.0   | 1.0   | 0.0   | 0.0   | 0.0   | 0.0  |
| 21UR-140660 | 0.0   | 0.0   | 0.0   | 0.0   | 0.0   | 0.0  |
| 21UR-140670 | 0.0   | 0.0   | 0.0   | 1.0   | 0.0   | 0.0  |
| 21UR-140680 | 1.0   | 0.0   | 0.0   | 0.0   | 0.0   | 0.0  |
| 21UR-140690 | 0.0   | 0.0   | 0.0   | 0.0   | 0.0   | 0.0  |
| 21UR-140700 | 0.0   | 0.0   | 0.0   | 0.0   | 0.0   | 0.0  |
| 21UR-140710 | 0.0   | 0.0   | 0.0   | 1.0   | 0.0   | 0.0  |
| 21UR-140720 | 0.0   | 0.0   | 0.0   | 0.0   | 0.0   | 0.0  |
| 21UR-140730 | 14.0  | 25.0  | 14.0  | 3.0   | 9.0   | 2.0  |
| 21UR-140740 | 0.0   | 0.0   | 0.0   | 0.0   | 0.0   | 0.0  |
| 21UR-140750 | 0.0   | 0.0   | 0.0   | 0.0   | 0.0   | 0.0  |
| 21UR-140760 | 0.0   | 1.0   | 0.0   | 0.0   | 0.0   | 0.0  |
| 21UR-140770 | 1.0   | 0.0   | 0.0   | 0.0   | 0.0   | 0.0  |
| 21UR-140780 | 0.0   | 0.0   | 0.0   | 0.0   | 0.0   | 0.0  |
| 21UR-140790 | 0.0   | 0.0   | 0.0   | 0.0   | 0.0   | 0.0  |
| 21UR-14080  | 12.0  | 0.0   | 10.0  | 8.0   | 3.0   | 0.0  |

|             |      |      |      |      |      |     |
|-------------|------|------|------|------|------|-----|
| 21UR-140800 | 0.0  | 0.0  | 0.0  | 0.0  | 0.0  | 0.0 |
| 21UR-140810 | 0.0  | 0.0  | 0.0  | 0.0  | 0.0  | 0.0 |
| 21UR-140820 | 0.0  | 0.0  | 0.0  | 0.0  | 0.0  | 0.0 |
| 21UR-140830 | 0.0  | 0.0  | 0.0  | 0.0  | 0.0  | 0.0 |
| 21UR-140840 | 0.0  | 0.0  | 0.0  | 0.0  | 1.0  | 0.0 |
| 21UR-140850 | 0.0  | 0.0  | 0.0  | 0.0  | 0.0  | 0.0 |
| 21UR-140860 | 1.0  | 0.0  | 0.0  | 0.0  | 0.0  | 1.1 |
| 21UR-140870 | 0.0  | 1.0  | 0.0  | 0.0  | 0.0  | 0.0 |
| 21UR-140880 | 0.0  | 0.0  | 0.0  | 0.0  | 0.0  | 0.0 |
| 21UR-140890 | 0.0  | 0.0  | 0.0  | 0.0  | 0.0  | 0.0 |
| 21UR-14090  | 0.0  | 0.0  | 0.0  | 0.0  | 0.0  | 0.1 |
| 21UR-140900 | 2.0  | 0.0  | 4.0  | 4.0  | 4.0  | 0.0 |
| 21UR-140910 | 0.0  | 0.0  | 0.0  | 0.0  | 0.0  | 0.0 |
| 21UR-140920 | 0.0  | 0.0  | 1.0  | 0.0  | 0.0  | 0.0 |
| 21UR-140930 | 0.0  | 0.0  | 0.0  | 0.0  | 0.0  | 0.0 |
| 21UR-140940 | 0.0  | 0.0  | 0.0  | 0.0  | 0.0  | 0.0 |
| 21UR-140950 | 0.0  | 0.0  | 0.0  | 0.0  | 0.0  | 0.0 |
| 21UR-140960 | 2.0  | 1.0  | 2.0  | 1.0  | 0.0  | 0.0 |
| 21UR-140970 | 0.0  | 0.0  | 0.0  | 0.0  | 0.0  | 0.0 |
| 21UR-140980 | 0.0  | 0.0  | 0.0  | 0.0  | 4.0  | 0.0 |
| 21UR-140990 | 8.0  | 0.0  | 8.0  | 0.0  | 0.0  | 0.0 |
| 21UR-1410   | 1.0  | 0.0  | 4.0  | 0.0  | 0.0  | 0.0 |
| 21UR-14100  | 0.0  | 0.0  | 0.0  | 0.0  | 1.0  | 0.0 |
| 21UR-141000 | 0.0  | 0.0  | 0.0  | 0.0  | 0.0  | 0.0 |
| 21UR-141010 | 0.0  | 0.0  | 0.0  | 0.0  | 0.0  | 0.0 |
| 21UR-141020 | 2.0  | 0.0  | 6.0  | 0.0  | 0.0  | 0.0 |
| 21UR-141030 | 0.0  | 0.0  | 0.0  | 0.0  | 0.0  | 0.0 |
| 21UR-141040 | 3.0  | 36.0 | 5.0  | 2.0  | 29.0 | 1.0 |
| 21UR-141050 | 3.0  | 7.0  | 1.0  | 1.0  | 1.0  | 2.0 |
| 21UR-141060 | 0.0  | 0.0  | 0.0  | 0.0  | 0.0  | 0.0 |
| 21UR-141070 | 16.0 | 5.0  | 33.0 | 14.0 | 48.0 | 0.0 |
| 21UR-141080 | 0.0  | 1.0  | 0.0  | 0.0  | 0.0  | 0.0 |
| 21UR-141090 | 0.0  | 0.0  | 0.0  | 0.0  | 0.0  | 0.0 |
| 21UR-14110  | 0.0  | 0.0  | 0.0  | 0.0  | 0.0  | 0.0 |
| 21UR-141100 | 0.0  | 0.0  | 0.0  | 0.0  | 0.0  | 0.0 |
| 21UR-141110 | 3.0  | 1.3  | 2.0  | 1.0  | 0.0  | 0.0 |
| 21UR-141120 | 0.0  | 0.0  | 0.0  | 0.0  | 0.0  | 0.0 |
| 21UR-141130 | 0.0  | 0.0  | 0.0  | 0.0  | 0.0  | 0.0 |
| 21UR-141140 | 0.0  | 0.0  | 0.0  | 0.0  | 0.0  | 0.0 |
| 21UR-141150 | 0.0  | 0.0  | 1.0  | 0.0  | 0.0  | 0.0 |
| 21UR-141160 | 3.7  | 0.0  | 4.0  | 1.0  | 4.0  | 0.0 |
| 21UR-141170 | 51.0 | 3.0  | 37.0 | 13.0 | 13.0 | 0.0 |
| 21UR-141180 | 0.0  | 1.0  | 0.0  | 2.0  | 3.0  | 0.0 |
| 21UR-141190 | 0.0  | 0.0  | 0.0  | 0.0  | 0.0  | 0.0 |
| 21UR-14120  | 8.0  | 11.0 | 12.0 | 2.0  | 24.0 | 1.0 |
| 21UR-141200 | 0.0  | 0.0  | 1.0  | 0.0  | 1.0  | 0.0 |
| 21UR-141210 | 0.0  | 0.0  | 0.0  | 0.0  | 0.0  | 0.0 |
| 21UR-141220 | 1.0  | 0.0  | 1.0  | 0.0  | 2.0  | 0.0 |
| 21UR-141230 | 0.0  | 0.0  | 0.0  | 0.0  | 0.0  | 0.0 |
| 21UR-141240 | 0.0  | 0.0  | 0.0  | 0.0  | 0.0  | 0.0 |
| 21UR-141250 | 0.0  | 0.0  | 0.0  | 0.0  | 0.0  | 0.0 |

|             |       |      |       |      |       |      |
|-------------|-------|------|-------|------|-------|------|
| 21UR-141260 | 0.0   | 0.0  | 0.0   | 0.0  | 0.0   | 0.0  |
| 21UR-141270 | 0.0   | 0.0  | 0.0   | 0.0  | 0.0   | 0.0  |
| 21UR-141280 | 0.0   | 0.0  | 0.0   | 0.0  | 0.0   | 0.0  |
| 21UR-141290 | 0.0   | 0.0  | 0.0   | 0.0  | 0.0   | 0.0  |
| 21UR-14130  | 0.0   | 2.0  | 0.0   | 0.0  | 1.0   | 0.0  |
| 21UR-141300 | 0.0   | 0.0  | 0.0   | 0.0  | 0.0   | 0.0  |
| 21UR-141310 | 0.0   | 2.0  | 0.0   | 1.0  | 2.0   | 0.0  |
| 21UR-141320 | 0.0   | 0.0  | 0.0   | 0.0  | 0.0   | 0.0  |
| 21UR-141330 | 0.0   | 0.0  | 0.0   | 0.0  | 0.0   | 0.0  |
| 21UR-141340 | 0.0   | 0.0  | 0.0   | 0.0  | 0.0   | 0.0  |
| 21UR-141350 | 6.0   | 1.0  | 6.0   | 0.0  | 5.0   | 0.0  |
| 21UR-141360 | 0.0   | 0.0  | 0.0   | 0.0  | 0.0   | 0.0  |
| 21UR-141370 | 0.0   | 0.0  | 0.0   | 0.0  | 0.0   | 0.0  |
| 21UR-141380 | 0.0   | 0.0  | 0.0   | 1.0  | 0.0   | 0.0  |
| 21UR-141390 | 0.0   | 0.0  | 0.0   | 0.0  | 0.0   | 0.0  |
| 21UR-14140  | 0.0   | 0.0  | 1.0   | 0.0  | 0.0   | 0.0  |
| 21UR-141400 | 0.0   | 0.0  | 0.0   | 0.0  | 0.0   | 0.0  |
| 21UR-141410 | 279.0 | 39.0 | 184.1 | 60.0 | 106.3 | 14.0 |
| 21UR-141420 | 1.0   | 0.0  | 0.0   | 0.0  | 0.0   | 0.0  |
| 21UR-141430 | 18.5  | 1.0  | 10.0  | 2.0  | 2.0   | 0.0  |
| 21UR-141440 | 0.0   | 0.0  | 0.0   | 0.0  | 0.0   | 0.0  |
| 21UR-141450 | 54.0  | 13.0 | 63.0  | 29.0 | 57.0  | 2.0  |
| 21UR-141460 | 0.0   | 0.0  | 0.0   | 0.0  | 0.0   | 0.0  |
| 21UR-141470 | 0.0   | 0.0  | 0.0   | 0.0  | 0.0   | 0.0  |
| 21UR-141480 | 0.0   | 0.0  | 1.0   | 0.0  | 2.0   | 0.0  |
| 21UR-141490 | 17.5  | 7.0  | 19.0  | 7.0  | 10.0  | 1.0  |
| 21UR-14150  | 34.0  | 63.0 | 38.0  | 13.0 | 140.0 | 41.0 |
| 21UR-141500 | 0.0   | 0.0  | 0.0   | 0.0  | 0.0   | 0.0  |
| 21UR-141510 | 0.0   | 0.0  | 0.0   | 0.0  | 0.0   | 0.0  |
| 21UR-141520 | 0.0   | 0.0  | 0.0   | 0.0  | 0.0   | 0.0  |
| 21UR-141530 | 0.0   | 0.0  | 0.0   | 1.0  | 0.0   | 0.0  |
| 21UR-141540 | 0.0   | 0.0  | 1.0   | 0.0  | 0.0   | 0.0  |
| 21UR-141550 | 5.0   | 0.0  | 7.0   | 1.0  | 2.0   | 1.0  |
| 21UR-141560 | 24.0  | 3.0  | 42.0  | 9.0  | 6.0   | 1.0  |
| 21UR-141570 | 0.0   | 0.0  | 0.0   | 0.0  | 0.0   | 0.0  |
| 21UR-141580 | 2.0   | 0.0  | 1.0   | 0.0  | 0.0   | 0.0  |
| 21UR-141590 | 1.0   | 0.0  | 0.0   | 0.0  | 0.0   | 0.0  |
| 21UR-14160  | 0.0   | 6.0  | 6.0   | 0.0  | 4.0   | 0.0  |
| 21UR-141600 | 0.0   | 0.0  | 0.0   | 0.0  | 0.0   | 0.0  |
| 21UR-141610 | 0.0   | 0.0  | 0.0   | 0.0  | 0.0   | 0.0  |
| 21UR-141620 | 2.0   | 3.0  | 1.0   | 1.0  | 5.0   | 2.0  |
| 21UR-141630 | 0.0   | 0.0  | 0.0   | 0.0  | 0.0   | 0.0  |
| 21UR-141640 | 7.0   | 1.0  | 9.0   | 3.0  | 1.0   | 0.0  |
| 21UR-141650 | 0.0   | 0.0  | 0.0   | 0.0  | 0.0   | 0.0  |
| 21UR-141660 | 6.0   | 4.0  | 2.0   | 1.0  | 2.0   | 2.0  |
| 21UR-141670 | 0.0   | 0.0  | 0.0   | 0.0  | 0.0   | 0.0  |
| 21UR-141680 | 0.0   | 0.0  | 0.0   | 0.0  | 0.0   | 0.0  |
| 21UR-141690 | 0.0   | 0.0  | 0.0   | 1.0  | 0.0   | 0.0  |
| 21UR-14170  | 44.0  | 58.0 | 40.0  | 50.0 | 16.0  | 16.0 |
| 21UR-141700 | 0.0   | 2.0  | 0.0   | 0.0  | 0.0   | 0.0  |
| 21UR-141710 | 0.0   | 0.0  | 0.0   | 0.0  | 0.0   | 0.0  |

|             |       |      |       |      |      |      |
|-------------|-------|------|-------|------|------|------|
| 21UR-141720 | 0.0   | 2.0  | 0.0   | 0.0  | 0.0  | 0.0  |
| 21UR-141730 | 0.0   | 0.0  | 0.0   | 0.0  | 0.0  | 0.0  |
| 21UR-141740 | 0.0   | 0.0  | 0.0   | 0.0  | 0.0  | 0.0  |
| 21UR-141750 | 0.0   | 0.0  | 0.0   | 0.0  | 0.0  | 0.0  |
| 21UR-141760 | 0.0   | 0.0  | 0.0   | 0.0  | 0.0  | 0.0  |
| 21UR-141770 | 0.0   | 0.0  | 0.0   | 0.0  | 0.0  | 0.0  |
| 21UR-141780 | 0.0   | 0.0  | 0.0   | 0.0  | 0.0  | 0.0  |
| 21UR-141790 | 0.0   | 0.0  | 0.0   | 0.0  | 0.0  | 0.0  |
| 21UR-14180  | 0.0   | 1.0  | 0.0   | 0.0  | 0.0  | 0.0  |
| 21UR-141800 | 98.5  | 13.0 | 77.0  | 35.0 | 17.2 | 8.0  |
| 21UR-141810 | 0.0   | 0.0  | 0.0   | 0.0  | 0.0  | 0.0  |
| 21UR-141820 | 6.0   | 3.0  | 6.0   | 6.0  | 40.0 | 1.0  |
| 21UR-141830 | 2.0   | 0.0  | 0.0   | 0.0  | 0.0  | 0.0  |
| 21UR-141840 | 0.0   | 0.0  | 2.0   | 1.0  | 5.0  | 2.0  |
| 21UR-141850 | 9.0   | 3.0  | 14.0  | 1.0  | 1.0  | 1.0  |
| 21UR-141860 | 0.0   | 0.0  | 2.0   | 1.0  | 2.2  | 0.0  |
| 21UR-141870 | 0.0   | 0.0  | 1.0   | 0.0  | 0.0  | 0.0  |
| 21UR-141880 | 5.0   | 3.0  | 8.0   | 1.0  | 2.0  | 2.0  |
| 21UR-141890 | 9.0   | 7.0  | 16.8  | 9.0  | 4.0  | 1.0  |
| 21UR-14190  | 230.0 | 19.0 | 190.0 | 95.0 | 92.0 | 8.0  |
| 21UR-141900 | 0.0   | 0.0  | 0.0   | 0.0  | 0.0  | 0.0  |
| 21UR-141910 | 0.0   | 0.0  | 0.0   | 0.0  | 0.0  | 0.0  |
| 21UR-141920 | 0.0   | 0.0  | 1.0   | 0.0  | 1.0  | 0.0  |
| 21UR-141930 | 0.0   | 0.0  | 0.0   | 0.0  | 0.0  | 0.0  |
| 21UR-141940 | 1.0   | 0.0  | 0.0   | 0.0  | 0.0  | 0.0  |
| 21UR-141950 | 0.0   | 0.0  | 0.0   | 0.0  | 0.0  | 0.0  |
| 21UR-141960 | 18.0  | 0.0  | 12.0  | 3.0  | 4.0  | 0.0  |
| 21UR-141970 | 1.0   | 0.0  | 1.0   | 0.0  | 0.0  | 0.0  |
| 21UR-141980 | 0.0   | 0.0  | 0.0   | 0.0  | 0.0  | 0.0  |
| 21UR-141990 | 0.0   | 0.0  | 0.0   | 0.0  | 0.0  | 0.0  |
| 21UR-1420   | 2.0   | 0.0  | 4.0   | 2.0  | 4.0  | 0.0  |
| 21UR-14200  | 1.0   | 1.0  | 1.0   | 1.0  | 1.0  | 0.0  |
| 21UR-142000 | 0.0   | 0.0  | 0.0   | 0.0  | 0.0  | 0.0  |
| 21UR-142010 | 0.0   | 0.0  | 0.0   | 0.0  | 0.0  | 0.0  |
| 21UR-142020 | 0.0   | 0.0  | 0.0   | 0.0  | 0.0  | 0.0  |
| 21UR-142030 | 1.0   | 0.3  | 1.0   | 0.0  | 4.0  | 1.0  |
| 21UR-142040 | 2.0   | 2.0  | 2.0   | 0.0  | 1.0  | 1.0  |
| 21UR-142050 | 4.0   | 2.0  | 2.0   | 0.0  | 8.0  | 0.0  |
| 21UR-142060 | 0.0   | 1.0  | 1.0   | 0.0  | 1.0  | 1.0  |
| 21UR-142070 | 0.0   | 0.0  | 0.0   | 0.0  | 0.0  | 0.0  |
| 21UR-142080 | 0.0   | 0.0  | 0.0   | 0.0  | 0.0  | 0.0  |
| 21UR-142090 | 0.0   | 0.0  | 0.0   | 1.0  | 0.0  | 0.0  |
| 21UR-14210  | 0.0   | 0.0  | 0.0   | 0.0  | 0.0  | 0.0  |
| 21UR-142100 | 0.0   | 0.0  | 0.0   | 0.0  | 0.0  | 1.0  |
| 21UR-142110 | 0.0   | 0.0  | 0.0   | 0.0  | 0.0  | 0.0  |
| 21UR-142120 | 0.0   | 0.0  | 0.0   | 0.0  | 1.0  | 0.0  |
| 21UR-142130 | 1.0   | 0.0  | 1.0   | 0.0  | 1.0  | 0.0  |
| 21UR-142140 | 0.0   | 0.0  | 0.0   | 0.0  | 0.0  | 0.0  |
| 21UR-142150 | 196.0 | 34.0 | 135.0 | 89.0 | 60.0 | 15.0 |
| 21UR-142160 | 0.0   | 0.0  | 0.0   | 0.0  | 0.0  | 0.0  |
| 21UR-142170 | 6.0   | 4.0  | 6.0   | 1.0  | 2.0  | 0.0  |

|             |      |       |      |      |      |     |
|-------------|------|-------|------|------|------|-----|
| 21UR-142180 | 0.0  | 0.0   | 0.0  | 0.0  | 0.0  | 0.0 |
| 21UR-142190 | 49.0 | 17.0  | 49.0 | 24.0 | 26.0 | 6.0 |
| 21UR-14220  | 0.0  | 0.0   | 1.0  | 0.0  | 3.0  | 0.0 |
| 21UR-142200 | 0.0  | 0.0   | 0.0  | 0.0  | 0.0  | 0.0 |
| 21UR-142210 | 1.0  | 0.0   | 0.0  | 0.0  | 0.0  | 0.0 |
| 21UR-142220 | 0.0  | 0.0   | 2.0  | 0.0  | 0.0  | 0.0 |
| 21UR-142230 | 1.0  | 0.0   | 1.0  | 1.0  | 0.0  | 0.0 |
| 21UR-142240 | 1.0  | 2.0   | 2.0  | 0.0  | 1.0  | 0.0 |
| 21UR-142250 | 2.0  | 1.0   | 3.0  | 1.0  | 0.0  | 0.0 |
| 21UR-142260 | 0.0  | 0.0   | 0.0  | 0.0  | 0.0  | 1.0 |
| 21UR-142270 | 2.0  | 0.0   | 0.0  | 0.0  | 1.0  | 1.0 |
| 21UR-142280 | 0.0  | 0.0   | 0.0  | 0.0  | 0.0  | 0.0 |
| 21UR-142290 | 1.0  | 1.0   | 1.0  | 0.0  | 0.0  | 0.0 |
| 21UR-14230  | 0.0  | 0.0   | 0.0  | 0.0  | 0.0  | 0.0 |
| 21UR-142300 | 0.0  | 0.0   | 0.0  | 0.0  | 0.0  | 0.0 |
| 21UR-142310 | 0.0  | 0.0   | 0.0  | 0.0  | 0.0  | 0.0 |
| 21UR-142320 | 1.0  | 0.0   | 0.0  | 0.0  | 0.0  | 0.0 |
| 21UR-142330 | 0.0  | 0.0   | 0.0  | 0.0  | 0.0  | 0.0 |
| 21UR-142340 | 0.0  | 0.0   | 0.0  | 0.0  | 0.0  | 0.0 |
| 21UR-142350 | 0.0  | 0.0   | 0.0  | 0.0  | 0.0  | 0.0 |
| 21UR-142360 | 3.0  | 2.0   | 0.0  | 0.0  | 3.0  | 0.0 |
| 21UR-142370 | 0.0  | 0.0   | 0.0  | 0.0  | 0.0  | 0.0 |
| 21UR-142380 | 0.0  | 0.0   | 0.0  | 0.0  | 0.0  | 0.0 |
| 21UR-142390 | 7.0  | 4.0   | 11.0 | 0.0  | 2.0  | 0.0 |
| 21UR-14240  | 9.0  | 1.0   | 7.0  | 8.0  | 4.0  | 0.0 |
| 21UR-142400 | 66.0 | 103.0 | 71.0 | 29.0 | 84.5 | 8.0 |
| 21UR-142410 | 1.0  | 3.0   | 1.0  | 0.0  | 1.0  | 1.0 |
| 21UR-142420 | 0.0  | 0.0   | 0.0  | 0.0  | 0.0  | 0.0 |
| 21UR-142430 | 0.0  | 0.0   | 0.0  | 0.0  | 0.0  | 0.0 |
| 21UR-142440 | 9.0  | 115.0 | 1.0  | 3.0  | 77.5 | 7.0 |
| 21UR-142450 | 9.0  | 4.0   | 7.0  | 4.0  | 14.0 | 3.0 |
| 21UR-142460 | 0.0  | 1.0   | 0.0  | 0.0  | 2.0  | 0.0 |
| 21UR-142470 | 0.0  | 1.0   | 0.0  | 0.0  | 1.0  | 0.0 |
| 21UR-142480 | 1.0  | 0.0   | 0.0  | 0.0  | 0.0  | 0.0 |
| 21UR-142490 | 0.0  | 0.0   | 0.0  | 0.0  | 0.0  | 0.0 |
| 21UR-14250  | 0.0  | 1.0   | 0.0  | 0.0  | 0.0  | 0.0 |
| 21UR-142500 | 0.0  | 0.0   | 0.0  | 0.0  | 0.0  | 0.0 |
| 21UR-142510 | 1.0  | 0.0   | 0.0  | 0.0  | 0.0  | 0.0 |
| 21UR-142520 | 0.0  | 0.0   | 3.0  | 0.0  | 1.0  | 0.0 |
| 21UR-142530 | 1.0  | 1.0   | 1.0  | 1.0  | 1.0  | 0.0 |
| 21UR-142540 | 5.0  | 0.0   | 3.0  | 1.0  | 6.0  | 0.0 |
| 21UR-142550 | 0.0  | 0.0   | 0.0  | 0.0  | 0.0  | 0.0 |
| 21UR-142560 | 0.0  | 0.0   | 0.0  | 0.0  | 1.0  | 1.0 |
| 21UR-142570 | 1.0  | 0.0   | 0.0  | 0.0  | 2.0  | 0.0 |
| 21UR-142580 | 0.0  | 0.0   | 0.0  | 0.0  | 0.0  | 0.0 |
| 21UR-142590 | 0.0  | 0.0   | 0.0  | 0.0  | 0.0  | 0.0 |
| 21UR-14260  | 2.0  | 1.0   | 1.0  | 0.0  | 4.7  | 0.0 |
| 21UR-142600 | 0.0  | 0.0   | 0.0  | 0.0  | 0.0  | 0.0 |
| 21UR-142610 | 0.0  | 0.0   | 0.0  | 0.0  | 0.0  | 0.0 |
| 21UR-142620 | 0.0  | 0.0   | 0.0  | 0.0  | 0.0  | 0.0 |
| 21UR-142630 | 3.0  | 4.0   | 5.0  | 0.0  | 5.0  | 0.0 |

|             |       |      |       |      |      |      |
|-------------|-------|------|-------|------|------|------|
| 21UR-142640 | 0.0   | 0.0  | 0.0   | 0.0  | 0.0  | 0.0  |
| 21UR-142650 | 0.0   | 0.0  | 0.0   | 0.0  | 0.0  | 0.0  |
| 21UR-142660 | 0.0   | 0.0  | 0.0   | 0.0  | 1.0  | 0.0  |
| 21UR-142670 | 0.0   | 0.0  | 0.0   | 0.0  | 0.0  | 0.0  |
| 21UR-142680 | 0.0   | 2.0  | 0.0   | 0.0  | 0.0  | 0.0  |
| 21UR-142690 | 0.0   | 0.0  | 0.0   | 0.0  | 0.0  | 0.0  |
| 21UR-14270  | 0.0   | 0.0  | 0.0   | 0.0  | 1.0  | 0.0  |
| 21UR-142700 | 0.0   | 0.0  | 0.0   | 0.0  | 0.0  | 0.0  |
| 21UR-142710 | 0.0   | 0.0  | 0.0   | 0.0  | 0.0  | 0.0  |
| 21UR-142720 | 9.0   | 9.0  | 3.0   | 2.0  | 8.0  | 0.1  |
| 21UR-142730 | 0.0   | 0.0  | 0.0   | 0.0  | 0.0  | 0.0  |
| 21UR-142740 | 0.0   | 2.0  | 0.0   | 0.0  | 1.0  | 0.0  |
| 21UR-142750 | 52.0  | 9.0  | 50.0  | 25.0 | 9.0  | 1.0  |
| 21UR-142760 | 0.0   | 0.0  | 0.0   | 0.0  | 1.0  | 0.0  |
| 21UR-142770 | 2.0   | 0.0  | 2.0   | 0.0  | 0.0  | 0.0  |
| 21UR-142780 | 0.0   | 0.0  | 0.0   | 0.0  | 0.0  | 0.0  |
| 21UR-142790 | 4.0   | 0.0  | 0.0   | 0.0  | 0.0  | 0.0  |
| 21UR-14280  | 0.0   | 0.0  | 1.0   | 0.0  | 0.0  | 2.0  |
| 21UR-142800 | 0.0   | 0.2  | 0.0   | 0.0  | 0.0  | 0.1  |
| 21UR-142810 | 0.0   | 0.0  | 0.0   | 0.0  | 0.0  | 0.0  |
| 21UR-142820 | 0.0   | 0.0  | 0.0   | 0.0  | 0.0  | 0.0  |
| 21UR-142830 | 12.0  | 4.0  | 18.0  | 2.0  | 14.0 | 0.0  |
| 21UR-142840 | 180.0 | 39.0 | 147.2 | 71.5 | 44.0 | 3.0  |
| 21UR-142850 | 0.0   | 0.0  | 0.0   | 0.0  | 0.0  | 0.0  |
| 21UR-142860 | 0.0   | 0.0  | 0.0   | 0.0  | 0.0  | 0.0  |
| 21UR-142870 | 0.0   | 0.0  | 0.0   | 0.0  | 0.1  | 0.0  |
| 21UR-142880 | 0.0   | 0.0  | 0.0   | 0.0  | 0.0  | 0.0  |
| 21UR-142890 | 0.0   | 0.0  | 1.0   | 0.0  | 0.0  | 0.0  |
| 21UR-14290  | 4.0   | 2.0  | 2.0   | 0.0  | 13.0 | 0.0  |
| 21UR-142900 | 0.0   | 0.0  | 0.0   | 0.0  | 0.0  | 0.0  |
| 21UR-142910 | 0.0   | 0.0  | 0.0   | 0.0  | 0.0  | 0.0  |
| 21UR-142920 | 0.0   | 0.0  | 1.0   | 0.0  | 0.0  | 0.0  |
| 21UR-142930 | 0.0   | 0.0  | 0.0   | 0.0  | 0.0  | 0.0  |
| 21UR-142940 | 1.0   | 2.1  | 2.0   | 0.0  | 5.0  | 2.0  |
| 21UR-142950 | 0.0   | 0.0  | 0.0   | 0.0  | 0.2  | 0.0  |
| 21UR-142960 | 0.0   | 0.0  | 0.0   | 0.0  | 0.0  | 0.0  |
| 21UR-142970 | 10.0  | 0.0  | 12.0  | 1.0  | 3.0  | 0.0  |
| 21UR-142980 | 0.0   | 1.0  | 2.0   | 1.0  | 0.0  | 0.0  |
| 21UR-142990 | 123.0 | 82.5 | 155.0 | 31.0 | 44.5 | 14.0 |
| 21UR-1430   | 1.0   | 6.0  | 1.0   | 0.0  | 8.0  | 0.0  |
| 21UR-14300  | 0.0   | 0.0  | 0.0   | 0.0  | 0.0  | 0.0  |
| 21UR-143000 | 0.0   | 0.0  | 0.0   | 0.0  | 0.0  | 0.0  |
| 21UR-143010 | 0.0   | 1.0  | 0.0   | 0.0  | 0.0  | 0.0  |
| 21UR-143020 | 0.0   | 0.0  | 0.0   | 0.0  | 0.0  | 0.0  |
| 21UR-143030 | 0.0   | 0.0  | 0.0   | 0.0  | 0.0  | 0.0  |
| 21UR-143040 | 0.0   | 0.0  | 0.0   | 0.0  | 0.0  | 0.0  |
| 21UR-143050 | 0.0   | 0.0  | 0.0   | 0.0  | 0.0  | 0.0  |
| 21UR-143060 | 0.0   | 1.0  | 0.0   | 0.0  | 0.0  | 0.0  |
| 21UR-143070 | 1.0   | 0.0  | 1.0   | 1.0  | 0.0  | 0.0  |
| 21UR-143080 | 0.0   | 1.0  | 4.0   | 0.0  | 0.0  | 0.0  |
| 21UR-143090 | 1.0   | 0.0  | 1.0   | 0.0  | 0.0  | 0.0  |



|             |       |      |       |      |      |      |
|-------------|-------|------|-------|------|------|------|
| 21UR-14310  | 0.0   | 0.0  | 0.0   | 0.0  | 1.0  | 0.0  |
| 21UR-143100 | 0.0   | 0.0  | 0.0   | 0.0  | 0.0  | 0.0  |
| 21UR-143110 | 0.0   | 0.0  | 0.0   | 0.0  | 0.0  | 0.0  |
| 21UR-143120 | 1.0   | 0.0  | 0.0   | 0.0  | 2.0  | 0.0  |
| 21UR-143130 | 0.0   | 0.0  | 0.0   | 0.0  | 0.0  | 0.0  |
| 21UR-143140 | 0.0   | 0.0  | 0.0   | 0.0  | 0.0  | 0.0  |
| 21UR-143150 | 0.0   | 0.0  | 0.0   | 0.0  | 0.0  | 0.0  |
| 21UR-143160 | 0.0   | 0.0  | 0.0   | 0.0  | 0.0  | 0.0  |
| 21UR-143170 | 2.0   | 0.0  | 1.0   | 1.0  | 0.0  | 0.0  |
| 21UR-143180 | 11.5  | 2.0  | 8.0   | 4.0  | 3.0  | 0.0  |
| 21UR-143190 | 0.0   | 1.0  | 0.0   | 0.0  | 1.0  | 1.0  |
| 21UR-14320  | 16.0  | 8.0  | 15.0  | 9.0  | 0.0  | 0.3  |
| 21UR-143200 | 0.0   | 0.0  | 0.0   | 0.0  | 0.0  | 0.0  |
| 21UR-143210 | 718.3 | 43.0 | 530.0 | 62.0 | 33.0 | 22.0 |
| 21UR-143220 | 0.0   | 0.0  | 0.0   | 0.0  | 0.0  | 0.0  |
| 21UR-143230 | 11.0  | 2.0  | 8.0   | 3.0  | 5.0  | 0.0  |
| 21UR-143240 | 0.0   | 0.0  | 0.0   | 0.0  | 0.0  | 0.0  |
| 21UR-143250 | 0.0   | 0.0  | 0.0   | 0.0  | 0.0  | 0.0  |
| 21UR-143260 | 1.0   | 2.0  | 0.0   | 0.0  | 0.0  | 0.0  |
| 21UR-143270 | 5.0   | 2.0  | 2.0   | 2.0  | 0.0  | 2.0  |
| 21UR-143280 | 0.0   | 0.0  | 1.0   | 1.0  | 1.0  | 0.0  |
| 21UR-143290 | 16.0  | 3.0  | 25.0  | 8.0  | 9.0  | 1.0  |
| 21UR-14330  | 36.0  | 10.0 | 23.0  | 18.0 | 16.0 | 0.5  |
| 21UR-143300 | 0.0   | 0.0  | 0.0   | 0.0  | 0.0  | 0.0  |
| 21UR-143310 | 1.0   | 1.0  | 2.0   | 3.0  | 0.0  | 0.0  |
| 21UR-143320 | 0.0   | 0.0  | 0.0   | 0.0  | 0.0  | 0.0  |
| 21UR-143330 | 0.0   | 0.0  | 0.0   | 0.0  | 0.0  | 0.0  |
| 21UR-143340 | 1.0   | 0.0  | 0.0   | 0.0  | 2.0  | 1.0  |
| 21UR-143350 | 0.0   | 0.0  | 0.0   | 0.0  | 0.0  | 0.0  |
| 21UR-143360 | 3.0   | 0.0  | 0.0   | 0.0  | 1.0  | 0.0  |
| 21UR-143370 | 0.0   | 0.0  | 0.0   | 0.0  | 2.0  | 0.0  |
| 21UR-143380 | 0.0   | 0.0  | 0.0   | 0.0  | 2.0  | 0.0  |
| 21UR-143390 | 0.0   | 1.0  | 0.0   | 0.0  | 0.0  | 0.0  |
| 21UR-14340  | 1.0   | 0.0  | 0.0   | 0.0  | 2.0  | 0.0  |
| 21UR-143400 | 21.0  | 7.0  | 19.0  | 5.0  | 8.0  | 1.0  |
| 21UR-143410 | 0.0   | 0.0  | 0.0   | 0.0  | 0.0  | 0.0  |
| 21UR-143420 | 0.0   | 0.0  | 0.0   | 0.0  | 0.0  | 0.0  |
| 21UR-143430 | 0.0   | 0.0  | 0.0   | 0.0  | 0.0  | 0.0  |
| 21UR-143440 | 0.0   | 1.0  | 1.0   | 0.0  | 0.0  | 1.0  |
| 21UR-143450 | 0.0   | 0.0  | 1.0   | 0.0  | 0.0  | 0.0  |
| 21UR-143460 | 0.0   | 0.0  | 0.0   | 0.0  | 0.0  | 0.0  |
| 21UR-143470 | 179.0 | 93.0 | 182.0 | 58.0 | 61.0 | 6.0  |
| 21UR-143480 | 0.0   | 0.0  | 0.0   | 0.0  | 0.0  | 0.0  |
| 21UR-143490 | 4.0   | 0.0  | 8.0   | 0.0  | 0.0  | 0.0  |
| 21UR-14350  | 0.0   | 0.0  | 0.0   | 0.0  | 1.0  | 0.0  |
| 21UR-143500 | 0.0   | 4.0  | 0.0   | 1.0  | 0.0  | 0.0  |
| 21UR-143510 | 0.0   | 0.0  | 0.0   | 0.0  | 0.0  | 0.0  |
| 21UR-143520 | 0.0   | 0.0  | 0.0   | 0.0  | 0.0  | 0.0  |
| 21UR-143530 | 0.0   | 0.0  | 0.0   | 0.0  | 0.0  | 0.0  |
| 21UR-143540 | 0.0   | 0.0  | 0.0   | 0.0  | 0.0  | 0.0  |
| 21UR-143550 | 141.0 | 32.5 | 126.0 | 67.5 | 34.0 | 1.0  |

|             |       |      |       |      |      |     |
|-------------|-------|------|-------|------|------|-----|
| 21UR-143560 | 115.0 | 16.0 | 100.0 | 58.0 | 25.0 | 5.0 |
| 21UR-143570 | 1.0   | 0.0  | 1.0   | 0.0  | 0.0  | 0.0 |
| 21UR-143580 | 0.0   | 0.0  | 0.0   | 0.0  | 0.0  | 0.0 |
| 21UR-143590 | 0.0   | 0.0  | 0.0   | 0.0  | 0.0  | 0.0 |
| 21UR-14360  | 0.0   | 0.0  | 0.0   | 0.0  | 0.0  | 0.0 |
| 21UR-143600 | 0.0   | 0.0  | 0.0   | 0.0  | 0.0  | 0.0 |
| 21UR-143610 | 1.0   | 1.0  | 0.0   | 0.0  | 0.0  | 0.0 |
| 21UR-143620 | 0.0   | 0.0  | 0.0   | 0.0  | 0.0  | 0.0 |
| 21UR-143630 | 0.0   | 0.0  | 0.0   | 0.0  | 0.0  | 0.0 |
| 21UR-143640 | 0.0   | 0.0  | 1.0   | 0.0  | 1.0  | 0.0 |
| 21UR-143650 | 0.0   | 0.0  | 0.0   | 0.0  | 2.0  | 0.0 |
| 21UR-143660 | 1.0   | 5.0  | 0.0   | 0.0  | 5.0  | 1.0 |
| 21UR-143670 | 0.0   | 0.0  | 0.0   | 0.0  | 0.0  | 0.0 |
| 21UR-143680 | 1.0   | 0.0  | 1.0   | 1.0  | 1.0  | 0.0 |
| 21UR-143690 | 2.0   | 0.0  | 2.0   | 1.0  | 1.0  | 0.0 |
| 21UR-14370  | 9.0   | 15.0 | 8.0   | 0.0  | 57.5 | 0.0 |
| 21UR-143700 | 0.0   | 0.0  | 0.0   | 0.0  | 0.0  | 0.0 |
| 21UR-143710 | 0.0   | 0.0  | 0.0   | 0.0  | 0.0  | 0.0 |
| 21UR-143720 | 0.0   | 0.0  | 0.0   | 0.0  | 0.0  | 0.0 |
| 21UR-143730 | 0.0   | 0.0  | 0.0   | 0.0  | 0.0  | 0.0 |
| 21UR-143740 | 0.0   | 0.0  | 0.0   | 0.0  | 0.0  | 0.0 |
| 21UR-143750 | 0.0   | 0.0  | 0.0   | 0.0  | 0.0  | 0.0 |
| 21UR-143760 | 0.0   | 0.0  | 0.0   | 0.0  | 0.0  | 0.0 |
| 21UR-143770 | 0.0   | 0.0  | 0.0   | 0.0  | 0.0  | 0.0 |
| 21UR-143780 | 0.0   | 0.0  | 0.0   | 0.0  | 0.0  | 0.0 |
| 21UR-143790 | 24.0  | 4.0  | 15.0  | 8.0  | 10.0 | 1.0 |
| 21UR-14380  | 0.0   | 0.0  | 0.0   | 0.0  | 0.0  | 0.0 |
| 21UR-143800 | 0.0   | 0.0  | 0.0   | 0.0  | 0.0  | 0.0 |
| 21UR-143810 | 0.0   | 0.3  | 0.0   | 0.0  | 0.0  | 0.0 |
| 21UR-143820 | 0.0   | 1.0  | 0.0   | 0.0  | 0.0  | 0.0 |
| 21UR-143830 | 0.0   | 2.0  | 0.0   | 0.0  | 0.0  | 0.0 |
| 21UR-143840 | 1.0   | 3.0  | 0.0   | 0.0  | 5.0  | 1.0 |
| 21UR-143850 | 0.0   | 0.0  | 0.0   | 0.0  | 0.0  | 0.0 |
| 21UR-143860 | 0.0   | 0.0  | 0.0   | 0.0  | 0.0  | 0.0 |
| 21UR-143870 | 0.0   | 0.0  | 0.0   | 0.0  | 1.0  | 0.0 |
| 21UR-143880 | 0.0   | 0.0  | 0.0   | 0.0  | 0.0  | 0.0 |
| 21UR-143890 | 0.0   | 0.0  | 0.0   | 0.0  | 0.0  | 0.0 |
| 21UR-14390  | 0.0   | 0.1  | 0.0   | 0.0  | 0.0  | 0.0 |
| 21UR-143900 | 0.0   | 0.0  | 0.0   | 0.0  | 0.0  | 0.0 |
| 21UR-143910 | 3.0   | 1.0  | 3.0   | 0.0  | 0.0  | 0.0 |
| 21UR-143920 | 1.0   | 0.1  | 0.0   | 0.0  | 0.0  | 0.0 |
| 21UR-143930 | 0.0   | 7.0  | 0.0   | 0.0  | 1.0  | 0.1 |
| 21UR-143940 | 4.0   | 14.0 | 1.0   | 1.0  | 7.3  | 0.0 |
| 21UR-143950 | 13.0  | 5.0  | 5.0   | 0.0  | 1.0  | 2.0 |
| 21UR-143960 | 0.0   | 0.0  | 0.0   | 0.0  | 0.0  | 0.0 |
| 21UR-143970 | 11.0  | 5.0  | 11.0  | 0.0  | 9.0  | 3.0 |
| 21UR-143980 | 52.0  | 74.0 | 76.0  | 21.0 | 90.0 | 3.0 |
| 21UR-143990 | 0.0   | 1.0  | 0.0   | 0.0  | 0.0  | 0.0 |
| 21UR-1440   | 0.0   | 0.0  | 0.0   | 0.0  | 0.0  | 0.0 |
| 21UR-14400  | 4.0   | 6.0  | 13.0  | 0.0  | 3.0  | 0.0 |
| 21UR-144000 | 0.0   | 0.0  | 0.0   | 0.0  | 0.0  | 0.0 |

|             |      |      |      |      |       |     |
|-------------|------|------|------|------|-------|-----|
| 21UR-144010 | 0.0  | 0.0  | 0.0  | 0.0  | 0.0   | 0.0 |
| 21UR-144020 | 0.0  | 0.0  | 0.0  | 0.0  | 0.0   | 0.0 |
| 21UR-144030 | 0.0  | 0.0  | 1.0  | 0.0  | 0.0   | 0.0 |
| 21UR-144040 | 4.0  | 3.0  | 5.0  | 0.0  | 2.0   | 0.0 |
| 21UR-144050 | 0.0  | 0.0  | 0.0  | 0.0  | 0.0   | 0.0 |
| 21UR-144060 | 9.0  | 2.0  | 12.0 | 1.0  | 0.0   | 1.0 |
| 21UR-144070 | 0.0  | 0.0  | 0.0  | 0.0  | 0.0   | 0.0 |
| 21UR-144080 | 0.0  | 0.0  | 1.0  | 0.0  | 0.0   | 0.0 |
| 21UR-144090 | 72.0 | 45.0 | 68.0 | 24.0 | 162.0 | 2.0 |
| 21UR-14410  | 6.0  | 4.0  | 6.0  | 1.0  | 7.0   | 0.0 |
| 21UR-144100 | 4.0  | 1.0  | 0.0  | 0.0  | 0.0   | 0.0 |
| 21UR-144110 | 5.0  | 4.0  | 7.0  | 2.0  | 13.0  | 0.0 |
| 21UR-144120 | 0.0  | 0.0  | 0.0  | 0.0  | 0.0   | 0.0 |
| 21UR-144130 | 7.0  | 4.0  | 2.0  | 0.0  | 7.0   | 0.0 |
| 21UR-144140 | 1.0  | 0.0  | 1.0  | 1.0  | 0.0   | 0.0 |
| 21UR-144150 | 0.0  | 0.0  | 0.0  | 0.0  | 0.0   | 0.0 |
| 21UR-144160 | 0.0  | 0.0  | 0.0  | 0.0  | 0.0   | 0.0 |
| 21UR-144170 | 0.0  | 0.0  | 0.0  | 0.0  | 0.0   | 0.0 |
| 21UR-144180 | 0.0  | 1.0  | 0.0  | 0.0  | 0.0   | 0.0 |
| 21UR-144190 | 0.0  | 0.0  | 0.0  | 0.0  | 0.0   | 0.0 |
| 21UR-14420  | 79.0 | 37.0 | 59.0 | 43.0 | 87.0  | 4.0 |
| 21UR-144200 | 0.0  | 0.0  | 0.0  | 0.0  | 0.0   | 0.0 |
| 21UR-144210 | 4.0  | 7.0  | 7.0  | 4.0  | 2.0   | 1.0 |
| 21UR-144220 | 0.0  | 0.0  | 0.0  | 0.0  | 0.0   | 0.0 |
| 21UR-144230 | 0.0  | 2.0  | 0.0  | 0.0  | 2.0   | 0.0 |
| 21UR-144240 | 3.0  | 0.0  | 1.0  | 1.0  | 0.0   | 0.0 |
| 21UR-144250 | 0.0  | 0.0  | 0.0  | 0.0  | 0.0   | 0.1 |
| 21UR-144260 | 0.0  | 0.0  | 0.0  | 0.0  | 0.0   | 0.0 |
| 21UR-144270 | 0.0  | 3.0  | 3.0  | 0.0  | 0.0   | 0.0 |
| 21UR-144280 | 0.0  | 0.0  | 0.0  | 0.0  | 0.0   | 0.0 |
| 21UR-144290 | 19.5 | 2.0  | 6.0  | 1.0  | 2.0   | 1.0 |
| 21UR-14430  | 1.0  | 0.0  | 0.0  | 0.0  | 0.0   | 0.0 |
| 21UR-144300 | 0.0  | 0.0  | 1.0  | 0.0  | 0.0   | 0.0 |
| 21UR-144310 | 0.0  | 0.0  | 0.0  | 0.0  | 0.0   | 0.0 |
| 21UR-144320 | 2.0  | 1.0  | 0.0  | 0.0  | 2.0   | 0.0 |
| 21UR-144330 | 49.3 | 3.0  | 13.0 | 9.0  | 11.0  | 2.0 |
| 21UR-144340 | 0.0  | 0.0  | 0.0  | 0.0  | 0.0   | 0.0 |
| 21UR-144350 | 0.0  | 0.0  | 0.0  | 0.0  | 0.0   | 0.0 |
| 21UR-144360 | 0.0  | 1.0  | 1.0  | 0.0  | 2.0   | 0.0 |
| 21UR-144370 | 0.0  | 0.0  | 0.0  | 0.0  | 0.0   | 0.0 |
| 21UR-144380 | 0.0  | 0.0  | 0.0  | 0.0  | 0.0   | 0.0 |
| 21UR-144390 | 0.0  | 0.0  | 0.0  | 0.0  | 0.0   | 0.0 |
| 21UR-14440  | 11.0 | 0.0  | 6.0  | 1.0  | 2.0   | 0.0 |
| 21UR-144400 | 23.0 | 20.0 | 22.0 | 8.0  | 49.0  | 2.0 |
| 21UR-144410 | 0.0  | 0.0  | 1.0  | 0.0  | 0.0   | 0.0 |
| 21UR-144420 | 0.0  | 1.0  | 0.0  | 0.0  | 3.0   | 0.0 |
| 21UR-144430 | 72.0 | 9.0  | 62.0 | 13.0 | 10.0  | 1.0 |
| 21UR-144440 | 0.0  | 0.0  | 0.0  | 0.0  | 0.0   | 0.0 |
| 21UR-144450 | 1.0  | 1.0  | 0.0  | 0.0  | 0.0   | 0.0 |
| 21UR-144460 | 0.0  | 0.0  | 0.0  | 0.0  | 0.0   | 0.0 |
| 21UR-144470 | 0.0  | 0.0  | 0.0  | 0.0  | 0.0   | 0.0 |

|             |       |       |       |       |       |      |
|-------------|-------|-------|-------|-------|-------|------|
| 21UR-144480 | 0.0   | 0.0   | 0.0   | 0.0   | 0.0   | 0.0  |
| 21UR-144490 | 0.0   | 1.0   | 0.0   | 0.0   | 0.0   | 0.0  |
| 21UR-14450  | 1.0   | 3.0   | 3.0   | 1.0   | 0.0   | 0.0  |
| 21UR-144500 | 0.0   | 0.0   | 0.0   | 0.0   | 0.0   | 0.0  |
| 21UR-144510 | 0.0   | 0.0   | 0.0   | 0.0   | 0.0   | 0.0  |
| 21UR-144520 | 5.0   | 11.0  | 5.0   | 0.0   | 4.0   | 0.0  |
| 21UR-144530 | 0.0   | 0.0   | 0.0   | 0.0   | 0.0   | 0.0  |
| 21UR-144540 | 0.0   | 0.0   | 0.0   | 0.0   | 0.0   | 0.0  |
| 21UR-144550 | 9.0   | 3.0   | 6.0   | 1.0   | 4.0   | 0.0  |
| 21UR-144560 | 16.0  | 7.0   | 5.0   | 2.0   | 4.0   | 0.0  |
| 21UR-144570 | 0.0   | 0.0   | 0.0   | 0.0   | 0.0   | 0.0  |
| 21UR-144580 | 0.0   | 1.0   | 0.0   | 0.0   | 1.0   | 0.0  |
| 21UR-144590 | 0.0   | 0.0   | 0.0   | 0.0   | 2.0   | 0.0  |
| 21UR-14460  | 0.0   | 0.0   | 1.0   | 0.0   | 0.0   | 0.0  |
| 21UR-144600 | 0.0   | 1.0   | 0.0   | 0.0   | 0.0   | 0.0  |
| 21UR-144610 | 0.0   | 0.0   | 0.0   | 0.0   | 0.0   | 0.0  |
| 21UR-144620 | 0.0   | 3.1   | 0.0   | 1.0   | 0.0   | 0.0  |
| 21UR-144630 | 0.0   | 0.0   | 0.0   | 0.0   | 1.0   | 0.0  |
| 21UR-144640 | 3.0   | 0.0   | 1.0   | 0.0   | 0.0   | 0.0  |
| 21UR-144650 | 0.0   | 2.8   | 0.0   | 0.0   | 0.0   | 0.3  |
| 21UR-144660 | 0.0   | 0.0   | 1.0   | 0.0   | 0.0   | 0.0  |
| 21UR-144670 | 50.0  | 59.0  | 47.0  | 74.0  | 121.7 | 10.0 |
| 21UR-144680 | 2.0   | 1.0   | 5.0   | 6.0   | 2.0   | 0.0  |
| 21UR-144690 | 0.0   | 0.0   | 0.0   | 0.0   | 0.0   | 0.0  |
| 21UR-14470  | 439.0 | 49.0  | 287.5 | 220.0 | 139.5 | 3.0  |
| 21UR-144700 | 0.0   | 0.0   | 0.0   | 0.0   | 0.0   | 0.0  |
| 21UR-144710 | 5.0   | 0.0   | 3.0   | 1.0   | 6.0   | 0.0  |
| 21UR-144720 | 0.0   | 0.1   | 0.0   | 0.0   | 0.0   | 0.0  |
| 21UR-144730 | 4.0   | 1.0   | 5.0   | 2.0   | 0.0   | 0.0  |
| 21UR-144740 | 0.0   | 0.0   | 0.0   | 0.0   | 0.0   | 0.0  |
| 21UR-144750 | 16.0  | 2.0   | 18.0  | 1.0   | 2.0   | 0.0  |
| 21UR-144760 | 4.0   | 0.0   | 1.0   | 1.0   | 3.0   | 0.0  |
| 21UR-144770 | 1.0   | 1.0   | 0.0   | 0.0   | 0.0   | 0.0  |
| 21UR-144780 | 12.0  | 3.0   | 21.0  | 0.0   | 8.0   | 1.0  |
| 21UR-144790 | 1.0   | 0.0   | 1.0   | 0.0   | 0.0   | 0.0  |
| 21UR-14480  | 16.0  | 9.0   | 10.0  | 1.0   | 10.0  | 1.0  |
| 21UR-144800 | 0.0   | 0.0   | 0.0   | 0.0   | 0.0   | 0.0  |
| 21UR-144810 | 0.0   | 0.0   | 1.0   | 0.0   | 0.0   | 0.0  |
| 21UR-144820 | 7.0   | 12.0  | 4.0   | 5.0   | 7.0   | 2.0  |
| 21UR-144830 | 267.0 | 126.0 | 138.0 | 66.0  | 51.3  | 13.0 |
| 21UR-144840 | 0.0   | 0.0   | 0.0   | 0.0   | 0.0   | 0.0  |
| 21UR-144850 | 16.0  | 1.0   | 13.0  | 3.0   | 8.8   | 0.0  |
| 21UR-144860 | 0.0   | 0.0   | 0.0   | 0.0   | 0.0   | 0.0  |
| 21UR-144870 | 2.0   | 0.0   | 0.0   | 0.0   | 0.0   | 0.0  |
| 21UR-144880 | 0.0   | 0.0   | 0.0   | 0.0   | 0.0   | 0.0  |
| 21UR-144890 | 0.0   | 3.0   | 0.0   | 1.0   | 1.0   | 0.0  |
| 21UR-14490  | 1.0   | 10.0  | 1.0   | 2.0   | 6.0   | 0.0  |
| 21UR-144900 | 0.0   | 0.0   | 0.0   | 0.0   | 0.0   | 0.0  |
| 21UR-144910 | 2.0   | 0.0   | 2.0   | 2.0   | 1.0   | 0.0  |
| 21UR-144920 | 26.0  | 2.0   | 26.0  | 3.0   | 1.0   | 0.0  |
| 21UR-144930 | 7.0   | 12.3  | 16.0  | 5.0   | 17.0  | 2.0  |

|             |      |      |      |     |      |     |
|-------------|------|------|------|-----|------|-----|
| 21UR-144940 | 0.0  | 6.0  | 2.0  | 4.0 | 7.0  | 0.0 |
| 21UR-144950 | 3.0  | 1.1  | 1.0  | 2.0 | 1.0  | 0.0 |
| 21UR-144960 | 1.0  | 17.0 | 5.0  | 0.0 | 7.0  | 1.0 |
| 21UR-144970 | 4.0  | 2.0  | 7.0  | 0.0 | 3.0  | 0.0 |
| 21UR-144980 | 16.0 | 2.0  | 21.0 | 4.0 | 8.0  | 0.0 |
| 21UR-144990 | 2.0  | 2.0  | 5.0  | 3.0 | 6.3  | 2.0 |
| 21UR-1450   | 0.0  | 0.0  | 0.0  | 0.0 | 1.0  | 0.0 |
| 21UR-14500  | 8.0  | 0.0  | 9.0  | 2.0 | 1.0  | 0.0 |
| 21UR-145000 | 0.0  | 0.0  | 0.0  | 0.0 | 0.0  | 0.0 |
| 21UR-145010 | 2.0  | 0.0  | 0.0  | 0.0 | 0.0  | 0.0 |
| 21UR-145020 | 0.0  | 0.0  | 0.0  | 0.0 | 0.0  | 0.0 |
| 21UR-145030 | 0.0  | 0.0  | 0.0  | 0.0 | 0.0  | 0.0 |
| 21UR-145040 | 1.0  | 0.0  | 0.0  | 0.0 | 0.0  | 0.0 |
| 21UR-145050 | 0.0  | 0.1  | 0.0  | 0.0 | 0.0  | 0.0 |
| 21UR-145060 | 12.0 | 1.0  | 17.0 | 1.0 | 1.0  | 0.0 |
| 21UR-145070 | 1.0  | 1.0  | 1.0  | 1.0 | 1.3  | 0.0 |
| 21UR-145080 | 0.0  | 0.0  | 0.0  | 0.0 | 0.0  | 0.0 |
| 21UR-145090 | 1.0  | 0.0  | 0.0  | 0.0 | 3.0  | 1.0 |
| 21UR-14510  | 0.0  | 0.0  | 0.0  | 0.0 | 0.0  | 0.0 |
| 21UR-145100 | 0.0  | 0.0  | 0.0  | 0.0 | 0.0  | 0.0 |
| 21UR-145110 | 0.0  | 0.0  | 0.0  | 0.0 | 0.0  | 0.0 |
| 21UR-145120 | 1.0  | 0.0  | 0.0  | 0.0 | 0.0  | 0.0 |
| 21UR-145130 | 1.0  | 1.0  | 1.0  | 0.0 | 0.0  | 0.0 |
| 21UR-145140 | 15.0 | 59.0 | 19.0 | 3.0 | 29.5 | 1.0 |
| 21UR-145150 | 0.0  | 0.0  | 0.0  | 0.0 | 0.0  | 0.0 |
| 21UR-145160 | 0.0  | 0.0  | 0.0  | 0.0 | 0.0  | 0.0 |
| 21UR-145170 | 0.0  | 0.0  | 0.0  | 0.0 | 0.0  | 0.0 |
| 21UR-145180 | 0.0  | 0.0  | 0.0  | 0.0 | 0.0  | 0.0 |
| 21UR-145190 | 0.0  | 0.0  | 0.0  | 0.0 | 0.3  | 0.0 |
| 21UR-14520  | 8.0  | 0.0  | 0.0  | 0.0 | 1.0  | 0.0 |
| 21UR-145200 | 0.0  | 0.0  | 0.0  | 0.0 | 0.0  | 0.0 |
| 21UR-145210 | 0.0  | 1.0  | 1.0  | 0.0 | 0.0  | 0.0 |
| 21UR-145220 | 5.0  | 0.0  | 0.0  | 1.0 | 1.0  | 2.0 |
| 21UR-145230 | 5.0  | 2.0  | 9.0  | 2.0 | 5.0  | 0.0 |
| 21UR-145240 | 0.0  | 0.0  | 0.0  | 0.0 | 0.0  | 0.0 |
| 21UR-145250 | 0.0  | 0.0  | 0.0  | 0.0 | 0.0  | 0.0 |
| 21UR-145260 | 46.0 | 2.0  | 30.5 | 5.0 | 0.0  | 1.0 |
| 21UR-145270 | 0.0  | 0.0  | 0.0  | 0.0 | 0.0  | 0.0 |
| 21UR-145280 | 2.0  | 13.0 | 2.0  | 0.0 | 2.0  | 0.0 |
| 21UR-145290 | 0.0  | 0.0  | 0.0  | 0.0 | 0.0  | 0.0 |
| 21UR-14530  | 24.0 | 8.0  | 8.0  | 7.0 | 4.0  | 0.0 |
| 21UR-145300 | 9.0  | 0.0  | 7.0  | 3.0 | 1.0  | 1.0 |
| 21UR-145310 | 0.0  | 0.0  | 0.0  | 0.0 | 0.0  | 0.0 |
| 21UR-145320 | 0.0  | 0.0  | 0.0  | 0.0 | 0.0  | 0.0 |
| 21UR-145330 | 0.0  | 0.0  | 1.0  | 0.0 | 0.0  | 0.0 |
| 21UR-145340 | 0.0  | 0.0  | 0.0  | 0.0 | 0.0  | 0.0 |
| 21UR-145350 | 0.0  | 2.0  | 0.0  | 0.0 | 0.0  | 0.0 |
| 21UR-145360 | 0.0  | 0.0  | 0.0  | 1.0 | 0.0  | 0.0 |
| 21UR-145370 | 0.0  | 0.0  | 0.0  | 0.0 | 0.0  | 0.0 |
| 21UR-145380 | 1.0  | 1.0  | 1.0  | 1.0 | 1.0  | 0.0 |
| 21UR-145390 | 0.0  | 2.0  | 0.0  | 0.0 | 3.0  | 0.0 |

|             |      |       |      |      |       |      |
|-------------|------|-------|------|------|-------|------|
| 21UR-14540  | 4.0  | 1.0   | 1.0  | 0.0  | 6.0   | 0.0  |
| 21UR-145400 | 8.0  | 2.0   | 9.0  | 0.0  | 1.0   | 0.0  |
| 21UR-145410 | 17.0 | 14.0  | 20.0 | 4.0  | 9.0   | 2.1  |
| 21UR-145420 | 0.0  | 0.0   | 0.0  | 0.0  | 0.0   | 0.0  |
| 21UR-145430 | 35.0 | 29.0  | 43.0 | 11.0 | 4.0   | 0.0  |
| 21UR-145440 | 0.0  | 5.0   | 0.0  | 0.0  | 4.0   | 0.0  |
| 21UR-145450 | 1.0  | 1.0   | 1.5  | 1.0  | 0.0   | 0.0  |
| 21UR-145460 | 0.0  | 0.0   | 0.0  | 0.0  | 0.0   | 0.0  |
| 21UR-145470 | 0.0  | 0.0   | 0.0  | 0.0  | 0.0   | 0.0  |
| 21UR-145480 | 0.0  | 0.0   | 0.0  | 0.0  | 0.0   | 0.0  |
| 21UR-145490 | 0.0  | 0.0   | 1.0  | 1.0  | 1.0   | 0.0  |
| 21UR-14550  | 0.0  | 0.0   | 0.0  | 0.0  | 0.0   | 0.0  |
| 21UR-145500 | 0.0  | 0.0   | 0.0  | 0.0  | 0.0   | 0.0  |
| 21UR-145510 | 0.0  | 0.0   | 0.0  | 0.0  | 0.0   | 0.0  |
| 21UR-145520 | 0.0  | 0.0   | 0.0  | 0.0  | 0.0   | 0.0  |
| 21UR-145530 | 0.0  | 0.0   | 1.0  | 0.0  | 0.0   | 0.0  |
| 21UR-145540 | 0.0  | 0.0   | 0.0  | 0.0  | 0.0   | 0.0  |
| 21UR-145550 | 1.0  | 8.0   | 2.0  | 1.0  | 14.0  | 2.0  |
| 21UR-145560 | 5.0  | 3.0   | 9.0  | 2.0  | 11.0  | 1.0  |
| 21UR-145570 | 0.0  | 0.0   | 1.0  | 0.0  | 0.0   | 0.0  |
| 21UR-145580 | 0.0  | 0.0   | 0.0  | 0.0  | 0.0   | 0.0  |
| 21UR-145590 | 21.0 | 2.0   | 14.0 | 9.0  | 2.0   | 2.0  |
| 21UR-14560  | 1.0  | 2.0   | 0.0  | 0.0  | 2.0   | 0.0  |
| 21UR-145600 | 0.0  | 1.0   | 0.0  | 0.0  | 0.0   | 0.0  |
| 21UR-145610 | 0.0  | 0.0   | 0.0  | 0.0  | 0.0   | 0.0  |
| 21UR-145620 | 8.0  | 11.0  | 4.0  | 0.0  | 7.0   | 0.0  |
| 21UR-145630 | 0.0  | 4.0   | 1.0  | 0.0  | 7.0   | 0.0  |
| 21UR-145640 | 3.0  | 0.0   | 4.0  | 0.0  | 0.0   | 0.0  |
| 21UR-145650 | 5.0  | 8.0   | 4.0  | 0.0  | 1.0   | 0.0  |
| 21UR-145660 | 3.0  | 0.0   | 1.0  | 2.0  | 1.0   | 0.0  |
| 21UR-145670 | 0.0  | 0.0   | 2.0  | 1.0  | 1.0   | 0.0  |
| 21UR-145680 | 1.0  | 0.0   | 0.0  | 0.0  | 0.0   | 0.0  |
| 21UR-145690 | 11.0 | 2.0   | 10.0 | 2.0  | 7.0   | 2.0  |
| 21UR-145700 | 0.0  | 0.0   | 0.0  | 0.0  | 0.0   | 0.0  |
| 21UR-145710 | 49.5 | 285.0 | 43.0 | 22.0 | 225.7 | 32.0 |
| 21UR-145720 | 1.0  | 0.0   | 0.0  | 0.0  | 1.0   | 0.0  |
| 21UR-145730 | 0.0  | 0.0   | 0.0  | 0.0  | 0.0   | 0.0  |
| 21UR-145740 | 0.0  | 0.0   | 0.0  | 0.0  | 0.0   | 0.0  |
| 21UR-145750 | 0.0  | 1.0   | 1.0  | 0.0  | 1.0   | 0.0  |
| 21UR-145760 | 0.0  | 0.0   | 0.0  | 0.0  | 0.0   | 0.0  |
| 21UR-145770 | 33.0 | 62.0  | 29.0 | 7.0  | 117.0 | 38.0 |
| 21UR-145780 | 0.0  | 0.0   | 0.0  | 0.0  | 1.0   | 0.0  |
| 21UR-145790 | 0.0  | 0.0   | 0.0  | 0.0  | 0.0   | 0.0  |
| 21UR-14580  | 0.0  | 0.0   | 0.0  | 0.0  | 0.0   | 0.0  |
| 21UR-145800 | 0.0  | 0.0   | 0.0  | 0.0  | 1.0   | 0.0  |
| 21UR-145810 | 22.0 | 7.0   | 18.0 | 4.0  | 7.0   | 4.0  |
| 21UR-145820 | 0.0  | 0.0   | 0.0  | 0.0  | 0.0   | 0.0  |
| 21UR-145830 | 0.0  | 0.0   | 2.0  | 0.0  | 3.0   | 1.0  |
| 21UR-145840 | 25.0 | 4.0   | 19.0 | 7.0  | 16.0  | 1.0  |
| 21UR-145850 | 0.0  | 1.0   | 0.0  | 0.0  | 0.0   | 0.0  |
| 21UR-145860 | 0.0  | 0.0   | 0.0  | 0.0  | 0.0   | 0.0  |

|             |      |      |      |     |      |     |
|-------------|------|------|------|-----|------|-----|
| 21UR-145870 | 0.0  | 0.0  | 0.0  | 0.0 | 0.0  | 0.0 |
| 21UR-145880 | 0.0  | 2.0  | 0.0  | 0.0 | 0.0  | 0.0 |
| 21UR-145890 | 1.0  | 0.0  | 0.0  | 0.0 | 0.0  | 0.0 |
| 21UR-14590  | 0.0  | 1.0  | 0.0  | 0.0 | 0.0  | 0.0 |
| 21UR-145900 | 0.0  | 0.0  | 0.0  | 0.0 | 0.0  | 0.0 |
| 21UR-145910 | 0.0  | 0.0  | 0.0  | 0.0 | 1.0  | 0.0 |
| 21UR-145920 | 4.0  | 2.0  | 4.0  | 2.0 | 0.0  | 0.0 |
| 21UR-145930 | 0.0  | 0.0  | 0.0  | 0.0 | 0.0  | 0.0 |
| 21UR-145940 | 0.0  | 0.0  | 0.0  | 0.0 | 0.0  | 0.0 |
| 21UR-145950 | 0.0  | 0.0  | 0.0  | 0.0 | 0.0  | 0.0 |
| 21UR-145960 | 0.0  | 0.0  | 0.0  | 0.0 | 0.0  | 0.0 |
| 21UR-145970 | 4.0  | 1.0  | 8.5  | 1.0 | 0.0  | 0.0 |
| 21UR-145980 | 0.0  | 0.0  | 0.0  | 0.0 | 0.0  | 0.0 |
| 21UR-145990 | 0.0  | 0.0  | 0.0  | 0.0 | 0.0  | 0.0 |
| 21UR-1460   | 0.0  | 0.0  | 0.0  | 0.0 | 0.0  | 0.0 |
| 21UR-14600  | 4.0  | 0.0  | 0.0  | 0.0 | 0.0  | 0.0 |
| 21UR-146000 | 7.0  | 3.0  | 6.0  | 0.0 | 1.0  | 0.0 |
| 21UR-146010 | 0.0  | 0.0  | 0.0  | 0.0 | 0.0  | 0.0 |
| 21UR-146020 | 0.0  | 1.0  | 0.0  | 0.0 | 1.0  | 0.0 |
| 21UR-146030 | 0.0  | 1.0  | 0.0  | 0.0 | 0.0  | 0.0 |
| 21UR-146040 | 0.0  | 0.0  | 0.0  | 0.0 | 0.0  | 0.0 |
| 21UR-146050 | 0.0  | 0.0  | 0.0  | 0.0 | 0.0  | 0.0 |
| 21UR-146060 | 0.0  | 0.0  | 0.0  | 0.0 | 0.0  | 0.0 |
| 21UR-146070 | 0.0  | 0.0  | 0.0  | 0.0 | 0.0  | 0.0 |
| 21UR-146080 | 0.0  | 0.0  | 0.0  | 0.0 | 0.0  | 0.0 |
| 21UR-146090 | 0.0  | 0.0  | 0.0  | 0.0 | 0.0  | 0.0 |
| 21UR-14610  | 6.0  | 3.5  | 6.0  | 0.0 | 10.0 | 0.0 |
| 21UR-146100 | 1.0  | 0.0  | 1.0  | 0.0 | 0.0  | 0.0 |
| 21UR-146110 | 18.0 | 3.0  | 17.0 | 5.0 | 7.0  | 3.0 |
| 21UR-146120 | 0.0  | 0.0  | 0.0  | 0.0 | 0.0  | 0.0 |
| 21UR-146130 | 0.0  | 0.0  | 4.0  | 1.0 | 1.0  | 1.0 |
| 21UR-146140 | 1.0  | 0.0  | 3.0  | 1.0 | 0.0  | 0.0 |
| 21UR-146150 | 0.0  | 1.0  | 0.0  | 0.0 | 0.0  | 0.0 |
| 21UR-146160 | 0.0  | 0.0  | 0.0  | 1.0 | 0.0  | 0.0 |
| 21UR-146170 | 0.0  | 0.0  | 1.0  | 0.0 | 0.0  | 0.0 |
| 21UR-146180 | 28.0 | 10.0 | 7.0  | 8.0 | 14.0 | 3.0 |
| 21UR-146190 | 20.0 | 3.0  | 12.0 | 7.0 | 4.0  | 0.0 |
| 21UR-14620  | 1.0  | 4.0  | 1.0  | 0.0 | 1.0  | 0.0 |
| 21UR-146200 | 0.0  | 0.0  | 0.0  | 0.0 | 1.0  | 0.0 |
| 21UR-146210 | 0.0  | 0.0  | 0.0  | 0.0 | 1.0  | 0.0 |
| 21UR-146220 | 2.0  | 2.0  | 2.0  | 1.0 | 1.0  | 2.0 |
| 21UR-146230 | 0.0  | 0.0  | 0.0  | 0.0 | 0.0  | 0.0 |
| 21UR-146240 | 0.0  | 0.0  | 0.0  | 0.0 | 0.0  | 0.0 |
| 21UR-146250 | 0.0  | 0.0  | 0.0  | 0.0 | 0.0  | 0.0 |
| 21UR-146260 | 24.0 | 4.0  | 15.0 | 0.0 | 1.0  | 1.0 |
| 21UR-146270 | 0.0  | 0.0  | 0.0  | 0.0 | 0.0  | 0.0 |
| 21UR-146280 | 0.0  | 0.0  | 0.0  | 0.0 | 0.0  | 0.0 |
| 21UR-146290 | 0.0  | 0.0  | 0.0  | 0.0 | 0.0  | 0.0 |
| 21UR-14630  | 4.0  | 4.0  | 0.0  | 0.0 | 1.0  | 2.0 |
| 21UR-146300 | 0.0  | 0.0  | 0.0  | 0.0 | 0.0  | 0.0 |
| 21UR-146310 | 0.0  | 1.0  | 0.0  | 0.0 | 3.0  | 0.0 |

|             |       |      |       |      |      |     |
|-------------|-------|------|-------|------|------|-----|
| 21UR-146320 | 0.0   | 0.0  | 0.0   | 0.0  | 0.0  | 0.0 |
| 21UR-146330 | 0.0   | 0.0  | 0.0   | 0.0  | 1.0  | 0.0 |
| 21UR-146340 | 21.0  | 5.0  | 15.0  | 4.0  | 11.3 | 1.0 |
| 21UR-146350 | 1.0   | 1.0  | 1.0   | 0.0  | 4.0  | 1.0 |
| 21UR-146360 | 0.0   | 0.0  | 0.0   | 0.0  | 0.0  | 0.0 |
| 21UR-146370 | 0.0   | 0.0  | 0.0   | 0.0  | 0.0  | 0.0 |
| 21UR-146380 | 0.0   | 0.0  | 0.0   | 0.0  | 0.0  | 0.0 |
| 21UR-146390 | 0.0   | 0.0  | 0.0   | 0.0  | 0.0  | 0.0 |
| 21UR-14640  | 91.0  | 21.0 | 62.0  | 49.0 | 28.0 | 4.0 |
| 21UR-146400 | 0.0   | 0.0  | 0.0   | 0.0  | 0.0  | 0.0 |
| 21UR-146410 | 0.0   | 0.0  | 0.0   | 0.0  | 0.0  | 0.0 |
| 21UR-146420 | 0.0   | 0.0  | 0.0   | 0.0  | 0.0  | 0.0 |
| 21UR-146430 | 0.0   | 0.0  | 0.0   | 0.0  | 0.0  | 0.0 |
| 21UR-146440 | 1.0   | 0.0  | 0.0   | 0.0  | 0.0  | 0.0 |
| 21UR-146450 | 0.0   | 2.5  | 0.0   | 0.0  | 0.0  | 0.1 |
| 21UR-146460 | 0.0   | 0.0  | 0.0   | 0.0  | 0.0  | 0.0 |
| 21UR-146470 | 0.0   | 0.0  | 0.0   | 0.0  | 0.0  | 0.0 |
| 21UR-146480 | 0.0   | 0.0  | 0.0   | 0.0  | 0.0  | 0.0 |
| 21UR-146490 | 0.0   | 0.0  | 0.0   | 0.0  | 1.0  | 0.0 |
| 21UR-14650  | 0.0   | 0.0  | 0.0   | 0.0  | 0.0  | 0.0 |
| 21UR-146500 | 0.0   | 0.0  | 0.0   | 0.0  | 0.0  | 0.0 |
| 21UR-146510 | 0.0   | 0.0  | 0.0   | 0.0  | 0.0  | 0.0 |
| 21UR-146520 | 0.0   | 0.0  | 0.0   | 0.0  | 0.0  | 0.0 |
| 21UR-146530 | 0.0   | 0.0  | 0.0   | 0.0  | 0.0  | 0.0 |
| 21UR-146540 | 38.0  | 5.0  | 33.0  | 6.0  | 16.0 | 0.0 |
| 21UR-146550 | 130.5 | 17.0 | 81.0  | 45.0 | 31.0 | 4.0 |
| 21UR-146560 | 0.0   | 1.0  | 0.0   | 0.0  | 0.0  | 0.0 |
| 21UR-146570 | 0.0   | 0.0  | 0.0   | 0.0  | 0.0  | 0.0 |
| 21UR-146580 | 0.0   | 0.0  | 0.0   | 0.0  | 0.0  | 0.0 |
| 21UR-146590 | 0.0   | 0.0  | 0.0   | 0.0  | 0.0  | 0.0 |
| 21UR-14660  | 1.0   | 1.0  | 4.0   | 0.0  | 5.0  | 0.0 |
| 21UR-146600 | 171.5 | 79.0 | 155.0 | 44.0 | 69.0 | 4.0 |
| 21UR-146610 | 5.0   | 3.0  | 5.0   | 2.0  | 0.0  | 1.0 |
| 21UR-146620 | 0.0   | 0.0  | 0.0   | 0.0  | 0.0  | 0.0 |
| 21UR-146630 | 0.0   | 0.0  | 0.0   | 0.0  | 0.0  | 0.0 |
| 21UR-146640 | 0.0   | 0.0  | 0.0   | 0.0  | 0.0  | 0.0 |
| 21UR-146650 | 0.0   | 0.0  | 0.0   | 0.0  | 0.0  | 0.0 |
| 21UR-146660 | 0.0   | 0.0  | 0.0   | 0.0  | 0.0  | 0.0 |
| 21UR-146670 | 0.0   | 0.0  | 0.0   | 0.0  | 0.0  | 0.0 |
| 21UR-146680 | 2.0   | 3.0  | 3.0   | 0.0  | 1.0  | 0.0 |
| 21UR-146690 | 0.0   | 0.0  | 0.0   | 0.0  | 0.0  | 0.0 |
| 21UR-14670  | 0.0   | 0.0  | 0.0   | 0.0  | 0.0  | 0.0 |
| 21UR-146700 | 0.0   | 0.0  | 0.0   | 0.0  | 0.0  | 0.0 |
| 21UR-146710 | 0.0   | 0.0  | 0.0   | 0.0  | 0.0  | 0.0 |
| 21UR-146720 | 6.0   | 1.0  | 6.0   | 0.0  | 5.0  | 0.0 |
| 21UR-146730 | 0.0   | 0.0  | 0.0   | 0.0  | 0.0  | 0.0 |
| 21UR-146740 | 0.0   | 1.0  | 1.0   | 0.0  | 1.0  | 1.0 |
| 21UR-146750 | 0.0   | 3.0  | 0.0   | 0.0  | 1.0  | 0.0 |
| 21UR-146760 | 0.0   | 0.0  | 0.0   | 0.0  | 0.0  | 0.0 |
| 21UR-146770 | 5.0   | 0.0  | 4.0   | 1.0  | 2.0  | 0.0 |
| 21UR-146780 | 0.0   | 0.0  | 0.0   | 0.0  | 0.0  | 0.0 |



|             |      |      |      |      |      |     |
|-------------|------|------|------|------|------|-----|
| 21UR-146790 | 1.0  | 0.0  | 1.0  | 0.0  | 0.0  | 0.0 |
| 21UR-14680  | 3.0  | 14.0 | 5.0  | 2.0  | 25.0 | 2.0 |
| 21UR-146800 | 4.0  | 1.0  | 6.0  | 3.0  | 6.0  | 0.0 |
| 21UR-146810 | 0.0  | 0.0  | 1.0  | 0.0  | 2.0  | 0.0 |
| 21UR-146820 | 0.0  | 0.0  | 0.0  | 0.0  | 0.0  | 0.0 |
| 21UR-146830 | 0.0  | 0.0  | 0.0  | 0.0  | 0.0  | 0.0 |
| 21UR-146840 | 0.0  | 0.0  | 0.0  | 0.0  | 0.0  | 0.0 |
| 21UR-146850 | 0.0  | 0.0  | 0.0  | 0.0  | 0.0  | 0.0 |
| 21UR-146860 | 0.0  | 0.0  | 0.0  | 0.0  | 0.0  | 0.0 |
| 21UR-146870 | 0.0  | 0.0  | 0.0  | 0.0  | 0.0  | 0.0 |
| 21UR-146880 | 1.0  | 0.0  | 0.0  | 0.0  | 0.0  | 0.0 |
| 21UR-146890 | 17.0 | 1.1  | 8.0  | 6.0  | 0.0  | 1.0 |
| 21UR-14690  | 35.0 | 4.0  | 13.0 | 0.0  | 1.0  | 0.0 |
| 21UR-146900 | 0.0  | 0.0  | 0.0  | 0.0  | 0.0  | 0.0 |
| 21UR-146910 | 0.0  | 1.0  | 1.0  | 0.0  | 0.0  | 0.0 |
| 21UR-146920 | 17.0 | 16.0 | 43.8 | 10.0 | 18.0 | 2.0 |
| 21UR-146930 | 0.0  | 0.0  | 0.0  | 0.0  | 0.0  | 0.0 |
| 21UR-146940 | 0.0  | 0.0  | 0.0  | 0.0  | 0.0  | 0.0 |
| 21UR-146950 | 0.0  | 0.0  | 0.0  | 0.0  | 0.0  | 0.0 |
| 21UR-146960 | 0.0  | 0.0  | 0.0  | 0.0  | 0.0  | 0.0 |
| 21UR-146970 | 5.0  | 0.0  | 4.0  | 0.0  | 0.0  | 1.0 |
| 21UR-146980 | 0.0  | 0.0  | 0.0  | 0.0  | 0.0  | 0.0 |
| 21UR-146990 | 1.0  | 0.0  | 1.0  | 1.0  | 1.0  | 0.0 |
| 21UR-1470   | 0.0  | 1.0  | 0.0  | 0.0  | 0.0  | 0.0 |
| 21UR-14700  | 0.0  | 0.0  | 0.0  | 0.0  | 0.0  | 0.0 |
| 21UR-147000 | 0.0  | 0.0  | 0.0  | 0.0  | 0.0  | 0.0 |
| 21UR-147010 | 0.0  | 0.0  | 0.0  | 0.0  | 0.0  | 0.0 |
| 21UR-147020 | 0.0  | 0.0  | 1.0  | 0.0  | 0.0  | 0.0 |
| 21UR-147030 | 0.0  | 0.0  | 0.0  | 0.0  | 0.0  | 0.0 |
| 21UR-147040 | 0.0  | 1.1  | 0.0  | 0.0  | 2.0  | 0.0 |
| 21UR-147050 | 0.0  | 0.0  | 0.0  | 0.0  | 0.0  | 0.0 |
| 21UR-147060 | 0.0  | 0.0  | 1.0  | 0.0  | 0.0  | 0.0 |
| 21UR-147070 | 0.0  | 0.0  | 0.0  | 0.0  | 0.0  | 0.0 |
| 21UR-147080 | 0.0  | 0.0  | 0.0  | 0.0  | 0.0  | 0.0 |
| 21UR-147090 | 0.0  | 0.0  | 0.0  | 0.0  | 0.0  | 0.0 |
| 21UR-14710  | 0.0  | 8.0  | 0.0  | 2.0  | 6.0  | 1.0 |
| 21UR-147100 | 0.0  | 0.0  | 0.0  | 0.0  | 0.0  | 0.0 |
| 21UR-147110 | 3.0  | 2.0  | 2.0  | 0.0  | 0.0  | 0.0 |
| 21UR-147120 | 1.0  | 7.3  | 0.0  | 0.0  | 0.0  | 0.6 |
| 21UR-147130 | 0.0  | 0.0  | 0.0  | 0.0  | 0.0  | 0.0 |
| 21UR-147140 | 8.0  | 0.0  | 8.0  | 6.0  | 1.0  | 0.0 |
| 21UR-147150 | 0.0  | 0.0  | 0.0  | 0.0  | 0.0  | 0.0 |
| 21UR-147160 | 0.0  | 0.0  | 0.0  | 0.0  | 0.0  | 0.0 |
| 21UR-147170 | 0.0  | 0.0  | 0.0  | 0.0  | 0.0  | 0.0 |
| 21UR-147180 | 3.0  | 1.0  | 5.0  | 1.0  | 1.0  | 0.0 |
| 21UR-147190 | 0.0  | 0.0  | 0.0  | 0.0  | 0.0  | 0.0 |
| 21UR-14720  | 4.0  | 10.0 | 0.0  | 1.0  | 8.0  | 0.0 |
| 21UR-147200 | 0.0  | 0.0  | 0.0  | 0.0  | 0.0  | 0.0 |
| 21UR-147210 | 0.0  | 0.0  | 0.0  | 0.0  | 0.0  | 0.0 |
| 21UR-147220 | 0.0  | 0.0  | 0.0  | 0.0  | 0.0  | 0.0 |
| 21UR-147230 | 0.0  | 0.0  | 0.0  | 0.0  | 0.0  | 0.0 |

|             |      |      |       |      |       |      |
|-------------|------|------|-------|------|-------|------|
| 21UR-147240 | 0.0  | 0.0  | 0.0   | 0.0  | 0.0   | 0.0  |
| 21UR-147250 | 0.0  | 0.0  | 0.0   | 0.0  | 0.0   | 0.0  |
| 21UR-147260 | 0.0  | 0.0  | 0.0   | 0.0  | 0.0   | 0.0  |
| 21UR-147270 | 12.0 | 7.0  | 4.0   | 4.0  | 6.0   | 2.0  |
| 21UR-147280 | 13.0 | 5.2  | 13.0  | 7.0  | 3.0   | 0.0  |
| 21UR-147290 | 0.0  | 0.0  | 0.0   | 0.0  | 0.0   | 0.0  |
| 21UR-14730  | 0.0  | 0.0  | 0.0   | 0.0  | 0.0   | 0.0  |
| 21UR-147300 | 0.0  | 0.0  | 0.0   | 0.0  | 0.0   | 0.0  |
| 21UR-147310 | 0.0  | 0.0  | 0.0   | 0.0  | 0.0   | 0.0  |
| 21UR-147320 | 0.0  | 0.0  | 0.0   | 0.0  | 0.0   | 0.0  |
| 21UR-147330 | 0.0  | 0.0  | 0.0   | 0.0  | 0.0   | 0.0  |
| 21UR-147340 | 98.0 | 86.0 | 104.0 | 31.0 | 144.0 | 11.0 |
| 21UR-147350 | 0.0  | 0.0  | 2.0   | 1.0  | 0.0   | 0.0  |
| 21UR-147360 | 0.0  | 0.0  | 0.0   | 0.0  | 0.0   | 0.0  |
| 21UR-147370 | 0.0  | 0.0  | 0.0   | 0.0  | 0.0   | 0.0  |
| 21UR-147380 | 0.0  | 0.0  | 0.0   | 0.0  | 0.0   | 0.0  |
| 21UR-147390 | 0.0  | 0.0  | 0.0   | 0.0  | 0.0   | 0.0  |
| 21UR-14740  | 1.0  | 1.0  | 6.0   | 0.0  | 0.0   | 0.0  |
| 21UR-147400 | 0.0  | 0.0  | 0.0   | 0.0  | 0.0   | 0.0  |
| 21UR-147410 | 1.0  | 0.0  | 0.0   | 0.0  | 0.0   | 1.0  |
| 21UR-147420 | 0.0  | 0.0  | 0.0   | 0.0  | 0.0   | 0.0  |
| 21UR-147430 | 0.0  | 0.0  | 0.0   | 0.0  | 0.0   | 0.0  |
| 21UR-147440 | 0.0  | 0.0  | 0.0   | 0.0  | 0.0   | 0.0  |
| 21UR-147450 | 0.0  | 0.0  | 0.0   | 0.0  | 0.0   | 0.0  |
| 21UR-147460 | 0.0  | 0.0  | 0.0   | 0.0  | 0.0   | 0.0  |
| 21UR-147470 | 0.0  | 0.0  | 0.0   | 0.0  | 0.0   | 0.0  |
| 21UR-147480 | 0.0  | 0.0  | 0.0   | 0.0  | 0.0   | 0.0  |
| 21UR-147490 | 1.0  | 0.0  | 0.0   | 0.0  | 0.0   | 0.0  |
| 21UR-14750  | 69.0 | 66.6 | 66.5  | 60.5 | 39.7  | 11.0 |
| 21UR-147500 | 0.0  | 0.0  | 0.0   | 0.0  | 0.0   | 0.0  |
| 21UR-147510 | 45.0 | 7.1  | 29.0  | 3.0  | 23.0  | 2.0  |
| 21UR-147520 | 0.0  | 0.0  | 0.0   | 0.0  | 0.0   | 0.0  |
| 21UR-147530 | 0.0  | 0.0  | 0.0   | 0.0  | 0.0   | 0.0  |
| 21UR-147540 | 0.0  | 0.0  | 0.0   | 0.0  | 0.0   | 0.0  |
| 21UR-147550 | 0.0  | 0.0  | 0.0   | 0.0  | 0.0   | 0.0  |
| 21UR-147560 | 0.0  | 0.0  | 0.0   | 0.0  | 0.0   | 0.0  |
| 21UR-147570 | 0.0  | 0.0  | 0.0   | 0.0  | 0.0   | 0.0  |
| 21UR-147580 | 0.0  | 0.0  | 0.0   | 0.0  | 0.0   | 0.0  |
| 21UR-147590 | 0.0  | 0.0  | 0.0   | 0.0  | 0.0   | 0.0  |
| 21UR-14760  | 30.0 | 4.0  | 41.0  | 13.0 | 3.0   | 1.0  |
| 21UR-147600 | 1.0  | 0.0  | 0.0   | 1.0  | 1.0   | 0.0  |
| 21UR-147610 | 0.0  | 1.0  | 1.0   | 0.0  | 0.0   | 0.0  |
| 21UR-147620 | 0.0  | 0.0  | 0.0   | 0.0  | 0.0   | 0.0  |
| 21UR-147630 | 0.0  | 0.0  | 0.0   | 0.0  | 0.0   | 0.0  |
| 21UR-147640 | 0.0  | 0.0  | 0.0   | 0.0  | 0.0   | 0.0  |
| 21UR-147650 | 0.0  | 0.0  | 0.0   | 0.0  | 0.0   | 0.0  |
| 21UR-147660 | 0.0  | 0.0  | 0.0   | 0.0  | 0.0   | 0.0  |
| 21UR-147670 | 0.0  | 0.0  | 0.0   | 0.0  | 0.0   | 0.0  |
| 21UR-147680 | 0.0  | 0.0  | 0.0   | 0.0  | 0.0   | 0.0  |
| 21UR-147690 | 0.0  | 0.0  | 0.0   | 0.0  | 0.0   | 0.0  |
| 21UR-14770  | 3.0  | 0.0  | 3.0   | 0.0  | 0.0   | 0.0  |

|             |      |      |      |      |      |     |
|-------------|------|------|------|------|------|-----|
| 21UR-147700 | 0.0  | 0.0  | 0.0  | 0.0  | 0.0  | 0.0 |
| 21UR-147710 | 15.0 | 27.0 | 16.0 | 16.0 | 50.0 | 3.0 |
| 21UR-147720 | 0.0  | 0.0  | 0.0  | 0.0  | 0.0  | 0.0 |
| 21UR-147730 | 0.0  | 0.0  | 0.0  | 0.0  | 0.0  | 0.0 |
| 21UR-147740 | 2.0  | 1.0  | 5.0  | 6.0  | 2.0  | 0.0 |
| 21UR-147750 | 0.0  | 0.0  | 0.0  | 0.0  | 0.0  | 0.0 |
| 21UR-147760 | 0.0  | 0.0  | 1.0  | 0.0  | 0.0  | 0.0 |
| 21UR-147770 | 0.0  | 0.1  | 0.0  | 0.0  | 0.2  | 0.1 |
| 21UR-147780 | 22.0 | 5.1  | 11.0 | 5.0  | 4.0  | 0.1 |
| 21UR-147790 | 0.0  | 0.0  | 1.0  | 0.0  | 0.0  | 0.0 |
| 21UR-14780  | 0.0  | 6.0  | 0.0  | 0.0  | 1.0  | 4.0 |
| 21UR-147800 | 0.0  | 0.0  | 0.0  | 0.0  | 0.0  | 0.0 |
| 21UR-147810 | 0.0  | 0.0  | 0.0  | 0.0  | 0.0  | 0.0 |
| 21UR-147820 | 0.0  | 0.0  | 0.0  | 0.0  | 0.0  | 0.0 |
| 21UR-147830 | 8.0  | 1.0  | 7.0  | 2.0  | 1.0  | 0.0 |
| 21UR-147840 | 0.0  | 0.0  | 0.0  | 0.0  | 0.0  | 0.0 |
| 21UR-147850 | 0.0  | 0.0  | 0.0  | 0.0  | 0.0  | 0.0 |
| 21UR-147860 | 0.0  | 0.0  | 0.0  | 0.0  | 0.0  | 0.0 |
| 21UR-147870 | 0.0  | 0.0  | 0.0  | 0.0  | 0.0  | 0.0 |
| 21UR-147880 | 0.0  | 0.0  | 0.0  | 0.0  | 0.0  | 1.0 |
| 21UR-147890 | 0.0  | 0.0  | 0.0  | 0.0  | 0.0  | 0.0 |
| 21UR-14790  | 0.0  | 2.0  | 4.0  | 0.0  | 3.0  | 0.0 |
| 21UR-147900 | 0.0  | 0.0  | 0.0  | 0.0  | 0.0  | 0.0 |
| 21UR-147910 | 0.0  | 0.0  | 0.0  | 0.0  | 0.0  | 0.0 |
| 21UR-147920 | 0.0  | 0.0  | 0.0  | 0.0  | 0.0  | 0.0 |
| 21UR-147930 | 0.0  | 0.0  | 0.0  | 1.0  | 4.0  | 0.0 |
| 21UR-147940 | 0.0  | 0.0  | 0.0  | 0.0  | 0.0  | 0.0 |
| 21UR-147950 | 1.0  | 0.0  | 0.0  | 0.0  | 0.0  | 1.0 |
| 21UR-147960 | 0.0  | 0.0  | 0.0  | 0.0  | 0.0  | 0.0 |
| 21UR-147970 | 0.0  | 0.0  | 0.0  | 0.0  | 0.0  | 0.0 |
| 21UR-147980 | 1.0  | 1.0  | 0.0  | 0.0  | 0.0  | 0.0 |
| 21UR-147990 | 1.0  | 0.0  | 0.0  | 0.0  | 0.0  | 0.0 |
| 21UR-1480   | 1.0  | 4.0  | 16.0 | 4.0  | 0.0  | 0.0 |
| 21UR-14800  | 1.0  | 8.0  | 3.5  | 0.0  | 4.0  | 0.0 |
| 21UR-148000 | 4.0  | 1.0  | 2.0  | 0.0  | 1.0  | 0.0 |
| 21UR-148010 | 2.0  | 0.0  | 0.0  | 1.0  | 1.0  | 0.0 |
| 21UR-148020 | 3.0  | 4.0  | 7.0  | 2.0  | 4.0  | 1.0 |
| 21UR-148030 | 0.0  | 0.0  | 0.0  | 0.0  | 0.0  | 1.0 |
| 21UR-148040 | 33.0 | 6.0  | 35.0 | 11.0 | 5.0  | 0.0 |
| 21UR-148050 | 0.0  | 0.0  | 0.0  | 0.0  | 0.0  | 0.0 |
| 21UR-148060 | 3.0  | 1.0  | 0.0  | 2.0  | 2.0  | 0.0 |
| 21UR-148070 | 0.0  | 0.0  | 0.0  | 0.0  | 0.0  | 0.0 |
| 21UR-148080 | 0.0  | 0.1  | 0.0  | 0.0  | 0.0  | 0.2 |
| 21UR-148090 | 0.0  | 0.0  | 0.0  | 0.0  | 0.0  | 0.0 |
| 21UR-14810  | 0.0  | 0.0  | 0.0  | 0.0  | 0.0  | 0.0 |
| 21UR-148100 | 0.0  | 0.0  | 0.0  | 0.0  | 0.0  | 0.0 |
| 21UR-148110 | 0.0  | 0.0  | 0.0  | 0.0  | 0.0  | 0.0 |
| 21UR-148120 | 0.0  | 0.0  | 0.0  | 0.0  | 0.0  | 0.0 |
| 21UR-148130 | 0.0  | 0.0  | 0.0  | 0.0  | 0.0  | 0.0 |
| 21UR-148140 | 0.0  | 0.0  | 0.0  | 0.0  | 0.0  | 0.0 |
| 21UR-148150 | 0.0  | 0.0  | 0.0  | 0.0  | 0.0  | 0.0 |

|             |       |       |       |       |       |      |
|-------------|-------|-------|-------|-------|-------|------|
| 21UR-148160 | 0.0   | 1.1   | 0.0   | 0.0   | 0.0   | 0.0  |
| 21UR-148170 | 0.0   | 0.0   | 0.0   | 0.0   | 0.0   | 0.0  |
| 21UR-148180 | 4.0   | 1.0   | 9.0   | 4.0   | 0.0   | 0.0  |
| 21UR-148190 | 0.0   | 0.0   | 0.0   | 0.0   | 0.0   | 0.0  |
| 21UR-14820  | 0.0   | 0.0   | 0.0   | 0.0   | 0.0   | 0.0  |
| 21UR-148200 | 0.0   | 0.0   | 0.0   | 0.0   | 0.0   | 0.0  |
| 21UR-148210 | 0.0   | 0.0   | 0.0   | 0.0   | 0.0   | 0.0  |
| 21UR-148220 | 0.0   | 0.0   | 0.0   | 0.0   | 0.0   | 0.0  |
| 21UR-148230 | 0.0   | 0.0   | 0.0   | 0.0   | 0.0   | 0.0  |
| 21UR-148240 | 0.0   | 0.0   | 0.0   | 0.0   | 0.0   | 0.0  |
| 21UR-148250 | 0.0   | 0.0   | 0.0   | 0.0   | 0.0   | 0.0  |
| 21UR-148260 | 0.0   | 0.0   | 0.0   | 0.0   | 0.0   | 0.0  |
| 21UR-148270 | 0.0   | 0.2   | 0.0   | 0.0   | 0.0   | 0.0  |
| 21UR-148280 | 0.0   | 0.0   | 0.0   | 0.0   | 0.0   | 0.0  |
| 21UR-148290 | 0.0   | 0.0   | 0.0   | 0.0   | 0.0   | 0.0  |
| 21UR-14830  | 31.0  | 30.0  | 26.0  | 23.0  | 19.0  | 2.0  |
| 21UR-148300 | 1.0   | 0.0   | 0.0   | 0.0   | 0.0   | 0.0  |
| 21UR-148310 | 0.0   | 0.0   | 0.0   | 0.0   | 0.0   | 0.0  |
| 21UR-148320 | 0.0   | 0.0   | 0.0   | 0.0   | 0.0   | 0.0  |
| 21UR-148330 | 1.0   | 0.0   | 0.0   | 0.0   | 0.0   | 0.0  |
| 21UR-148340 | 0.0   | 0.0   | 0.0   | 0.0   | 0.0   | 0.0  |
| 21UR-148350 | 0.0   | 0.0   | 0.0   | 0.0   | 0.0   | 0.0  |
| 21UR-148360 | 0.0   | 0.0   | 0.0   | 0.0   | 0.0   | 0.0  |
| 21UR-148370 | 0.0   | 0.0   | 1.0   | 0.0   | 0.0   | 0.0  |
| 21UR-148380 | 0.0   | 0.0   | 0.0   | 0.0   | 0.0   | 0.0  |
| 21UR-148390 | 0.0   | 0.0   | 0.0   | 0.0   | 0.0   | 0.0  |
| 21UR-14840  | 1.0   | 3.0   | 1.0   | 1.0   | 8.0   | 0.0  |
| 21UR-148400 | 10.0  | 2.0   | 5.5   | 0.0   | 2.0   | 0.0  |
| 21UR-148410 | 9.0   | 0.0   | 5.0   | 4.0   | 0.0   | 0.0  |
| 21UR-148420 | 0.0   | 0.0   | 0.0   | 0.0   | 0.0   | 0.0  |
| 21UR-148430 | 0.0   | 0.0   | 0.0   | 0.0   | 0.0   | 0.0  |
| 21UR-148440 | 9.0   | 0.0   | 6.0   | 4.0   | 1.0   | 1.0  |
| 21UR-148450 | 1.0   | 0.0   | 0.0   | 0.0   | 0.0   | 0.0  |
| 21UR-148460 | 0.0   | 0.0   | 0.0   | 0.0   | 0.0   | 0.0  |
| 21UR-148470 | 0.0   | 0.0   | 0.0   | 0.0   | 0.0   | 0.0  |
| 21UR-148480 | 0.0   | 1.0   | 0.0   | 0.0   | 0.0   | 0.0  |
| 21UR-148490 | 0.0   | 1.5   | 0.0   | 0.0   | 0.0   | 0.0  |
| 21UR-14850  | 0.0   | 1.5   | 2.0   | 0.0   | 1.0   | 0.0  |
| 21UR-148500 | 0.0   | 0.0   | 0.0   | 0.0   | 0.0   | 0.0  |
| 21UR-148510 | 0.0   | 0.0   | 0.0   | 0.0   | 0.0   | 1.0  |
| 21UR-148520 | 529.5 | 102.0 | 660.5 | 335.0 | 126.0 | 12.0 |
| 21UR-148530 | 0.0   | 0.0   | 0.0   | 0.0   | 0.0   | 0.0  |
| 21UR-148540 | 0.0   | 0.1   | 0.0   | 0.0   | 0.0   | 0.0  |
| 21UR-148550 | 53.0  | 29.0  | 35.0  | 25.0  | 30.0  | 3.0  |
| 21UR-148560 | 0.0   | 0.0   | 0.0   | 0.0   | 0.0   | 0.0  |
| 21UR-148570 | 0.0   | 0.0   | 0.0   | 0.0   | 0.0   | 0.0  |
| 21UR-148580 | 0.0   | 0.0   | 0.0   | 0.0   | 0.0   | 0.0  |
| 21UR-148590 | 0.0   | 0.0   | 0.0   | 0.0   | 0.0   | 0.0  |
| 21UR-14860  | 165.0 | 114.0 | 88.0  | 39.0  | 113.0 | 10.2 |
| 21UR-148600 | 0.0   | 0.0   | 0.0   | 0.0   | 0.0   | 0.0  |
| 21UR-148610 | 0.0   | 0.0   | 0.0   | 0.0   | 0.0   | 0.0  |

|             |      |      |      |      |      |     |
|-------------|------|------|------|------|------|-----|
| 21UR-148620 | 10.0 | 2.0  | 7.0  | 2.0  | 4.0  | 1.0 |
| 21UR-148630 | 0.0  | 0.0  | 0.0  | 0.0  | 0.0  | 0.0 |
| 21UR-148640 | 0.0  | 0.0  | 3.0  | 0.0  | 1.0  | 0.0 |
| 21UR-148650 | 5.0  | 12.0 | 4.0  | 1.0  | 12.0 | 5.0 |
| 21UR-148660 | 0.0  | 0.0  | 0.0  | 0.0  | 0.0  | 0.0 |
| 21UR-148670 | 27.0 | 41.0 | 22.0 | 8.0  | 8.0  | 6.0 |
| 21UR-148680 | 0.0  | 0.1  | 0.0  | 0.0  | 0.0  | 0.0 |
| 21UR-148690 | 1.0  | 0.0  | 2.0  | 0.0  | 0.0  | 0.0 |
| 21UR-14870  | 4.0  | 6.0  | 4.0  | 1.0  | 23.0 | 1.0 |
| 21UR-148700 | 1.0  | 2.1  | 2.0  | 4.0  | 0.0  | 1.3 |
| 21UR-148710 | 0.0  | 0.0  | 0.0  | 0.0  | 0.0  | 0.0 |
| 21UR-148720 | 0.0  | 0.0  | 0.0  | 0.0  | 0.0  | 0.0 |
| 21UR-148730 | 0.0  | 0.0  | 0.0  | 0.0  | 0.0  | 0.0 |
| 21UR-148740 | 0.0  | 0.0  | 0.0  | 0.0  | 0.0  | 0.0 |
| 21UR-148750 | 0.0  | 0.0  | 0.0  | 0.0  | 0.0  | 0.0 |
| 21UR-148760 | 52.0 | 72.0 | 76.0 | 21.0 | 88.0 | 3.0 |
| 21UR-148770 | 0.0  | 0.0  | 0.0  | 0.0  | 0.0  | 0.0 |
| 21UR-148780 | 0.0  | 0.0  | 0.0  | 0.0  | 0.0  | 0.0 |
| 21UR-148790 | 0.0  | 0.0  | 0.0  | 0.0  | 0.0  | 0.0 |
| 21UR-14880  | 63.0 | 40.2 | 52.0 | 19.3 | 83.0 | 2.0 |
| 21UR-148800 | 2.0  | 0.0  | 0.0  | 0.0  | 0.0  | 0.0 |
| 21UR-148810 | 0.0  | 0.0  | 0.0  | 0.0  | 0.0  | 0.0 |
| 21UR-148820 | 0.0  | 0.0  | 0.0  | 0.0  | 0.0  | 0.0 |
| 21UR-148830 | 0.0  | 0.0  | 0.0  | 0.0  | 0.0  | 0.0 |
| 21UR-148840 | 0.0  | 0.0  | 0.0  | 0.0  | 0.0  | 0.0 |
| 21UR-148850 | 0.0  | 0.0  | 0.0  | 0.0  | 0.0  | 0.0 |
| 21UR-148860 | 5.0  | 0.0  | 1.0  | 2.0  | 0.5  | 0.0 |
| 21UR-148870 | 6.0  | 0.0  | 10.0 | 3.0  | 0.0  | 0.0 |
| 21UR-148880 | 0.0  | 0.0  | 0.0  | 0.0  | 0.0  | 0.0 |
| 21UR-148890 | 0.0  | 0.0  | 0.0  | 0.0  | 0.0  | 0.0 |
| 21UR-14890  | 4.0  | 1.0  | 6.0  | 0.0  | 1.0  | 1.0 |
| 21UR-148900 | 1.0  | 0.0  | 0.0  | 0.0  | 1.0  | 0.0 |
| 21UR-148910 | 0.0  | 0.0  | 0.0  | 0.0  | 0.0  | 0.0 |
| 21UR-148920 | 0.0  | 0.0  | 2.0  | 0.0  | 0.0  | 0.0 |
| 21UR-148930 | 0.0  | 0.0  | 0.0  | 0.0  | 0.0  | 0.0 |
| 21UR-148940 | 0.0  | 0.0  | 0.0  | 0.0  | 0.0  | 0.0 |
| 21UR-148950 | 4.0  | 3.0  | 6.0  | 0.0  | 1.0  | 0.0 |
| 21UR-148960 | 1.0  | 0.0  | 0.0  | 0.0  | 0.0  | 0.0 |
| 21UR-148970 | 0.0  | 0.0  | 0.0  | 0.0  | 0.0  | 0.0 |
| 21UR-148980 | 0.0  | 0.0  | 0.0  | 0.0  | 0.0  | 0.0 |
| 21UR-148990 | 0.0  | 0.0  | 0.0  | 0.0  | 0.0  | 0.0 |
| 21UR-1490   | 0.0  | 0.0  | 0.0  | 0.0  | 0.0  | 0.0 |
| 21UR-14900  | 53.0 | 16.0 | 30.0 | 16.0 | 4.0  | 1.0 |
| 21UR-149000 | 0.0  | 0.0  | 0.0  | 0.0  | 0.0  | 0.0 |
| 21UR-149010 | 0.0  | 0.0  | 0.0  | 0.0  | 0.0  | 0.0 |
| 21UR-149020 | 0.0  | 0.0  | 0.0  | 0.0  | 0.0  | 0.0 |
| 21UR-149030 | 0.0  | 0.0  | 0.0  | 0.0  | 0.0  | 0.0 |
| 21UR-149040 | 4.0  | 0.0  | 1.0  | 1.0  | 1.0  | 0.0 |
| 21UR-149050 | 0.0  | 0.0  | 0.0  | 0.0  | 0.0  | 0.0 |
| 21UR-149060 | 0.0  | 0.0  | 0.0  | 0.0  | 0.0  | 0.0 |
| 21UR-149070 | 24.0 | 2.0  | 12.0 | 6.0  | 1.0  | 0.1 |

|             |      |     |      |     |      |     |
|-------------|------|-----|------|-----|------|-----|
| 21UR-149080 | 0.0  | 0.0 | 0.0  | 0.0 | 0.0  | 0.0 |
| 21UR-149090 | 0.0  | 0.0 | 0.0  | 0.0 | 0.0  | 0.0 |
| 21UR-14910  | 1.0  | 5.0 | 2.0  | 0.0 | 4.0  | 0.0 |
| 21UR-149100 | 0.0  | 0.0 | 0.0  | 0.0 | 0.0  | 0.0 |
| 21UR-149110 | 0.0  | 0.0 | 0.0  | 0.0 | 0.0  | 0.0 |
| 21UR-149120 | 0.0  | 0.0 | 0.0  | 0.0 | 0.0  | 0.0 |
| 21UR-149130 | 0.0  | 0.0 | 0.0  | 0.0 | 0.0  | 0.0 |
| 21UR-149140 | 0.0  | 0.0 | 0.0  | 0.0 | 0.0  | 0.0 |
| 21UR-149150 | 0.0  | 2.0 | 0.0  | 0.0 | 0.0  | 0.3 |
| 21UR-149160 | 0.0  | 0.0 | 0.0  | 0.0 | 0.0  | 0.0 |
| 21UR-149170 | 0.0  | 0.0 | 0.0  | 0.0 | 0.0  | 1.0 |
| 21UR-149180 | 0.0  | 0.0 | 0.0  | 0.0 | 0.0  | 0.0 |
| 21UR-149190 | 0.0  | 0.0 | 0.0  | 0.0 | 0.0  | 0.0 |
| 21UR-14920  | 0.0  | 0.0 | 6.0  | 0.0 | 1.0  | 0.0 |
| 21UR-149200 | 0.0  | 0.0 | 0.0  | 0.0 | 0.0  | 0.0 |
| 21UR-149210 | 0.0  | 0.0 | 0.0  | 0.0 | 0.0  | 0.0 |
| 21UR-149220 | 0.0  | 0.0 | 0.0  | 0.0 | 0.0  | 0.0 |
| 21UR-149230 | 0.0  | 0.0 | 0.0  | 0.0 | 0.0  | 0.0 |
| 21UR-149240 | 0.0  | 0.0 | 0.0  | 0.0 | 0.0  | 0.0 |
| 21UR-149250 | 0.0  | 0.0 | 0.0  | 0.0 | 0.0  | 0.0 |
| 21UR-149260 | 0.0  | 0.2 | 0.0  | 0.0 | 0.0  | 0.1 |
| 21UR-149270 | 0.0  | 0.0 | 0.0  | 0.0 | 0.0  | 0.0 |
| 21UR-149280 | 0.0  | 0.0 | 0.0  | 0.0 | 0.0  | 0.0 |
| 21UR-149290 | 0.0  | 0.0 | 0.0  | 0.0 | 0.0  | 0.0 |
| 21UR-14930  | 42.0 | 0.0 | 24.0 | 9.3 | 25.2 | 0.0 |
| 21UR-149300 | 0.0  | 1.0 | 1.0  | 0.0 | 0.0  | 0.0 |
| 21UR-149310 | 6.0  | 1.3 | 4.0  | 1.0 | 0.0  | 0.0 |
| 21UR-149320 | 0.0  | 0.0 | 0.0  | 0.0 | 0.0  | 0.0 |
| 21UR-149330 | 2.0  | 0.0 | 2.0  | 0.0 | 0.0  | 0.0 |
| 21UR-149340 | 0.0  | 0.0 | 0.0  | 0.0 | 0.0  | 0.0 |
| 21UR-149350 | 0.0  | 0.0 | 0.0  | 0.0 | 0.0  | 0.0 |
| 21UR-149360 | 0.0  | 0.0 | 0.0  | 0.0 | 0.0  | 0.0 |
| 21UR-149370 | 0.0  | 0.0 | 0.0  | 0.0 | 0.0  | 0.0 |
| 21UR-149380 | 8.0  | 5.0 | 6.0  | 3.0 | 7.0  | 1.0 |
| 21UR-149390 | 0.0  | 2.0 | 0.0  | 0.0 | 0.0  | 0.0 |
| 21UR-14940  | 0.0  | 2.0 | 0.0  | 0.0 | 0.0  | 0.0 |
| 21UR-149400 | 0.0  | 0.0 | 0.0  | 0.0 | 0.0  | 0.0 |
| 21UR-149410 | 0.0  | 0.0 | 0.0  | 0.0 | 0.0  | 0.0 |
| 21UR-149420 | 0.0  | 0.0 | 0.0  | 0.0 | 0.0  | 0.0 |
| 21UR-149430 | 0.0  | 1.0 | 0.0  | 0.0 | 0.0  | 0.0 |
| 21UR-149440 | 0.0  | 0.0 | 0.0  | 0.0 | 0.0  | 0.0 |
| 21UR-149450 | 0.0  | 0.0 | 0.0  | 0.0 | 0.0  | 0.0 |
| 21UR-149460 | 0.0  | 1.0 | 0.0  | 0.0 | 0.0  | 0.0 |
| 21UR-149470 | 0.0  | 0.0 | 0.0  | 0.0 | 0.0  | 0.0 |
| 21UR-149480 | 0.0  | 0.0 | 0.0  | 0.0 | 0.0  | 0.0 |
| 21UR-149490 | 1.0  | 0.0 | 0.0  | 0.0 | 0.0  | 0.0 |
| 21UR-14950  | 1.0  | 0.0 | 0.0  | 0.0 | 0.0  | 0.0 |
| 21UR-149500 | 0.0  | 0.0 | 0.0  | 0.0 | 0.0  | 0.0 |
| 21UR-149510 | 0.0  | 0.0 | 0.0  | 0.0 | 0.0  | 0.0 |
| 21UR-149520 | 0.0  | 0.0 | 0.0  | 0.0 | 0.0  | 0.0 |
| 21UR-149530 | 0.0  | 0.0 | 1.0  | 0.0 | 0.0  | 0.0 |

|             |      |      |      |      |      |      |
|-------------|------|------|------|------|------|------|
| 21UR-149540 | 0.0  | 0.0  | 0.0  | 0.0  | 0.0  | 0.0  |
| 21UR-149550 | 0.0  | 0.0  | 0.0  | 0.0  | 0.0  | 0.0  |
| 21UR-149560 | 0.0  | 0.0  | 0.0  | 1.0  | 0.0  | 0.0  |
| 21UR-149570 | 0.0  | 0.0  | 0.0  | 0.0  | 0.0  | 0.0  |
| 21UR-149580 | 0.0  | 0.0  | 0.0  | 0.0  | 0.0  | 0.0  |
| 21UR-149590 | 0.0  | 0.0  | 4.0  | 0.0  | 0.0  | 0.0  |
| 21UR-14960  | 41.0 | 14.0 | 39.0 | 27.0 | 0.0  | 0.0  |
| 21UR-149600 | 0.0  | 0.0  | 0.0  | 0.0  | 0.0  | 0.0  |
| 21UR-149610 | 0.0  | 0.0  | 0.0  | 0.0  | 0.0  | 0.0  |
| 21UR-149620 | 2.0  | 0.0  | 0.0  | 0.0  | 1.0  | 0.0  |
| 21UR-149630 | 78.0 | 44.0 | 76.0 | 21.0 | 14.0 | 4.0  |
| 21UR-149640 | 4.0  | 0.0  | 4.0  | 1.0  | 3.0  | 0.0  |
| 21UR-149650 | 0.0  | 0.0  | 0.0  | 1.0  | 0.0  | 0.0  |
| 21UR-149660 | 99.0 | 16.1 | 77.0 | 37.0 | 6.0  | 2.0  |
| 21UR-149670 | 36.0 | 13.0 | 19.0 | 12.0 | 40.0 | 3.0  |
| 21UR-149680 | 0.0  | 0.0  | 0.0  | 0.0  | 0.0  | 0.0  |
| 21UR-149690 | 0.0  | 0.0  | 0.0  | 0.0  | 0.0  | 0.0  |
| 21UR-14970  | 44.0 | 87.0 | 34.0 | 8.0  | 46.7 | 15.0 |
| 21UR-149700 | 0.0  | 0.0  | 0.0  | 0.0  | 0.0  | 0.0  |
| 21UR-149710 | 0.0  | 0.0  | 0.0  | 0.0  | 0.0  | 0.0  |
| 21UR-149720 | 0.0  | 0.0  | 0.0  | 0.0  | 0.0  | 0.0  |
| 21UR-149730 | 0.0  | 0.0  | 0.0  | 0.0  | 0.0  | 0.0  |
| 21UR-149740 | 0.0  | 0.0  | 0.0  | 0.0  | 0.0  | 0.0  |
| 21UR-149750 | 0.0  | 0.0  | 0.0  | 0.0  | 0.0  | 0.0  |
| 21UR-149760 | 0.0  | 0.0  | 0.0  | 0.0  | 0.1  | 0.0  |
| 21UR-149770 | 0.0  | 0.0  | 0.0  | 0.0  | 0.0  | 0.0  |
| 21UR-149780 | 0.0  | 0.0  | 0.0  | 0.0  | 0.0  | 0.0  |
| 21UR-149790 | 2.0  | 2.0  | 2.0  | 0.0  | 0.0  | 0.0  |
| 21UR-14980  | 2.0  | 1.0  | 1.0  | 0.0  | 1.0  | 0.0  |
| 21UR-149800 | 0.0  | 0.0  | 1.0  | 0.0  | 0.0  | 0.0  |
| 21UR-149810 | 0.0  | 0.0  | 0.0  | 0.0  | 0.0  | 0.0  |
| 21UR-149820 | 1.0  | 0.0  | 1.0  | 0.0  | 0.0  | 0.0  |
| 21UR-149830 | 1.0  | 1.0  | 2.0  | 2.0  | 0.0  | 0.0  |
| 21UR-149840 | 0.0  | 0.0  | 0.0  | 0.0  | 0.0  | 0.0  |
| 21UR-149850 | 0.0  | 0.0  | 0.0  | 0.0  | 0.0  | 0.0  |
| 21UR-149860 | 0.0  | 0.0  | 0.0  | 0.0  | 0.0  | 0.0  |
| 21UR-149870 | 0.0  | 0.0  | 0.0  | 0.0  | 0.0  | 0.0  |
| 21UR-149880 | 0.0  | 0.0  | 0.0  | 0.0  | 0.0  | 0.0  |
| 21UR-149890 | 0.0  | 0.0  | 0.0  | 0.0  | 0.0  | 0.0  |
| 21UR-14990  | 6.0  | 3.0  | 8.0  | 0.0  | 0.0  | 0.0  |
| 21UR-149900 | 0.0  | 0.0  | 0.0  | 0.0  | 0.0  | 0.0  |
| 21UR-149910 | 0.0  | 0.0  | 0.0  | 0.0  | 0.0  | 0.0  |
| 21UR-149920 | 0.0  | 0.0  | 0.0  | 1.0  | 0.0  | 0.0  |
| 21UR-149930 | 11.0 | 1.0  | 12.0 | 4.0  | 2.0  | 0.0  |
| 21UR-149940 | 0.0  | 0.0  | 0.0  | 0.0  | 0.0  | 0.0  |
| 21UR-149950 | 0.0  | 0.0  | 0.0  | 0.0  | 0.0  | 0.0  |
| 21UR-149960 | 0.0  | 0.0  | 0.0  | 0.0  | 0.0  | 0.0  |
| 21UR-149970 | 0.0  | 8.0  | 1.0  | 0.0  | 6.0  | 1.0  |
| 21UR-149980 | 4.0  | 2.5  | 2.0  | 1.0  | 0.0  | 1.0  |
| 21UR-149990 | 0.0  | 0.0  | 0.0  | 0.0  | 0.0  | 0.0  |
| 21UR-150    | 1.0  | 1.0  | 0.0  | 0.0  | 0.1  | 1.0  |

|             |      |      |      |      |      |      |
|-------------|------|------|------|------|------|------|
| 21UR-1500   | 1.0  | 1.0  | 0.0  | 0.0  | 0.0  | 0.0  |
| 21UR-15000  | 8.0  | 4.0  | 25.0 | 1.0  | 8.0  | 0.0  |
| 21UR-150000 | 0.0  | 0.0  | 0.0  | 0.0  | 0.0  | 0.0  |
| 21UR-150010 | 0.0  | 0.0  | 0.0  | 0.0  | 0.0  | 0.0  |
| 21UR-150020 | 0.0  | 0.0  | 1.0  | 0.0  | 1.0  | 0.0  |
| 21UR-150030 | 0.0  | 0.0  | 0.0  | 0.0  | 0.0  | 0.0  |
| 21UR-150040 | 0.0  | 0.0  | 0.0  | 0.0  | 0.0  | 0.0  |
| 21UR-150050 | 0.0  | 0.0  | 0.0  | 0.0  | 0.0  | 0.0  |
| 21UR-150060 | 0.0  | 0.0  | 0.0  | 0.0  | 0.0  | 0.0  |
| 21UR-150070 | 0.0  | 3.0  | 1.0  | 0.0  | 2.0  | 0.0  |
| 21UR-150080 | 0.0  | 0.0  | 0.0  | 0.0  | 0.0  | 0.0  |
| 21UR-150090 | 0.0  | 0.0  | 0.0  | 0.0  | 0.0  | 0.0  |
| 21UR-15010  | 0.0  | 0.0  | 0.0  | 0.0  | 0.0  | 0.0  |
| 21UR-150100 | 0.0  | 0.0  | 0.0  | 0.0  | 0.0  | 0.0  |
| 21UR-150110 | 0.0  | 0.0  | 0.0  | 0.0  | 0.0  | 0.0  |
| 21UR-150120 | 0.0  | 0.0  | 0.0  | 1.0  | 0.0  | 0.0  |
| 21UR-150130 | 0.0  | 0.0  | 1.0  | 0.0  | 0.0  | 0.0  |
| 21UR-150140 | 0.0  | 0.0  | 0.0  | 0.0  | 0.0  | 0.0  |
| 21UR-150150 | 10.0 | 5.0  | 13.0 | 8.0  | 2.0  | 0.0  |
| 21UR-150160 | 0.0  | 0.0  | 0.0  | 0.0  | 0.0  | 0.0  |
| 21UR-150170 | 0.0  | 0.0  | 0.0  | 0.0  | 0.0  | 0.0  |
| 21UR-150180 | 15.0 | 5.0  | 5.0  | 0.0  | 2.0  | 0.0  |
| 21UR-150190 | 0.0  | 1.0  | 0.0  | 0.0  | 0.0  | 0.0  |
| 21UR-15020  | 20.0 | 4.0  | 18.0 | 1.0  | 8.0  | 0.0  |
| 21UR-150200 | 0.0  | 0.0  | 0.0  | 0.0  | 0.0  | 0.0  |
| 21UR-150210 | 1.0  | 0.0  | 0.0  | 1.0  | 0.0  | 0.0  |
| 21UR-150220 | 0.0  | 0.0  | 0.0  | 0.0  | 0.0  | 0.0  |
| 21UR-150230 | 0.0  | 0.0  | 0.0  | 0.0  | 0.0  | 0.0  |
| 21UR-150240 | 0.0  | 0.0  | 0.0  | 0.0  | 0.0  | 0.0  |
| 21UR-150250 | 2.0  | 2.0  | 5.0  | 0.0  | 0.0  | 0.0  |
| 21UR-150260 | 0.0  | 0.0  | 0.0  | 0.0  | 0.0  | 0.0  |
| 21UR-150270 | 0.0  | 0.0  | 0.0  | 0.0  | 0.0  | 0.0  |
| 21UR-150280 | 0.0  | 0.0  | 0.0  | 0.0  | 1.0  | 0.0  |
| 21UR-150290 | 42.0 | 24.0 | 59.0 | 12.0 | 21.0 | 1.0  |
| 21UR-150300 | 0.0  | 0.0  | 0.0  | 0.0  | 0.0  | 0.0  |
| 21UR-150310 | 0.0  | 0.0  | 0.0  | 0.0  | 0.0  | 0.0  |
| 21UR-150320 | 0.0  | 0.0  | 0.0  | 0.0  | 0.0  | 0.0  |
| 21UR-150330 | 0.0  | 0.0  | 0.0  | 0.0  | 0.0  | 0.0  |
| 21UR-150340 | 0.0  | 0.0  | 0.0  | 0.0  | 0.0  | 0.0  |
| 21UR-150350 | 0.0  | 0.0  | 0.0  | 0.0  | 0.0  | 0.0  |
| 21UR-150360 | 0.0  | 0.0  | 0.0  | 0.0  | 0.0  | 0.0  |
| 21UR-150370 | 0.0  | 0.0  | 0.0  | 0.0  | 0.0  | 0.0  |
| 21UR-150380 | 0.0  | 0.0  | 0.0  | 0.0  | 0.0  | 0.0  |
| 21UR-150390 | 0.0  | 0.0  | 1.0  | 0.0  | 0.0  | 1.0  |
| 21UR-15040  | 1.0  | 0.0  | 0.0  | 0.0  | 0.0  | 0.0  |
| 21UR-150400 | 0.0  | 2.0  | 0.0  | 0.0  | 2.0  | 0.0  |
| 21UR-150410 | 2.0  | 4.0  | 1.0  | 0.0  | 8.0  | 1.0  |
| 21UR-150420 | 0.0  | 0.0  | 0.0  | 0.0  | 0.0  | 0.0  |
| 21UR-150430 | 28.0 | 35.0 | 43.0 | 12.0 | 47.0 | 11.0 |
| 21UR-150440 | 2.0  | 3.0  | 0.0  | 2.0  | 1.0  | 1.0  |
| 21UR-150450 | 0.0  | 1.0  | 0.0  | 0.0  | 1.0  | 0.0  |



|             |      |      |      |      |      |     |
|-------------|------|------|------|------|------|-----|
| 21UR-150460 | 0.0  | 0.0  | 0.0  | 0.0  | 0.0  | 0.0 |
| 21UR-150470 | 0.0  | 0.0  | 0.0  | 0.0  | 0.0  | 0.0 |
| 21UR-150480 | 0.0  | 0.0  | 0.0  | 0.0  | 0.0  | 0.0 |
| 21UR-150490 | 0.0  | 0.0  | 0.0  | 0.0  | 0.0  | 0.0 |
| 21UR-15050  | 0.0  | 4.0  | 0.0  | 0.0  | 2.0  | 0.0 |
| 21UR-150500 | 0.0  | 0.0  | 0.0  | 0.0  | 0.0  | 0.0 |
| 21UR-150510 | 0.0  | 0.0  | 0.0  | 0.0  | 0.0  | 0.0 |
| 21UR-150520 | 0.0  | 0.0  | 0.0  | 0.0  | 0.0  | 0.0 |
| 21UR-150530 | 0.0  | 1.0  | 0.0  | 0.0  | 7.0  | 1.0 |
| 21UR-150540 | 0.0  | 0.0  | 0.0  | 0.0  | 0.0  | 0.0 |
| 21UR-150550 | 0.0  | 0.0  | 0.0  | 0.0  | 0.0  | 0.0 |
| 21UR-150560 | 0.0  | 0.0  | 1.0  | 0.0  | 0.0  | 0.0 |
| 21UR-150570 | 0.0  | 0.0  | 0.0  | 0.0  | 1.0  | 0.0 |
| 21UR-150580 | 0.0  | 0.0  | 0.0  | 0.0  | 0.0  | 0.0 |
| 21UR-150590 | 0.0  | 0.0  | 0.0  | 0.0  | 0.0  | 0.0 |
| 21UR-15060  | 0.0  | 0.0  | 0.0  | 0.0  | 1.0  | 0.0 |
| 21UR-150600 | 0.0  | 0.0  | 0.0  | 0.0  | 0.0  | 0.0 |
| 21UR-150610 | 0.0  | 0.0  | 0.0  | 0.0  | 0.0  | 0.0 |
| 21UR-150620 | 0.0  | 0.0  | 0.0  | 0.0  | 0.0  | 0.0 |
| 21UR-150630 | 0.0  | 0.0  | 0.0  | 0.0  | 0.0  | 0.0 |
| 21UR-150640 | 0.0  | 0.0  | 0.0  | 1.0  | 0.0  | 0.0 |
| 21UR-150650 | 0.0  | 0.0  | 0.0  | 0.0  | 0.0  | 0.0 |
| 21UR-150660 | 0.0  | 0.0  | 0.0  | 0.0  | 0.0  | 0.0 |
| 21UR-150670 | 0.0  | 0.0  | 0.0  | 0.0  | 0.0  | 1.0 |
| 21UR-150680 | 0.0  | 0.0  | 0.0  | 0.0  | 0.0  | 0.0 |
| 21UR-150690 | 0.0  | 0.0  | 0.0  | 0.0  | 0.0  | 0.0 |
| 21UR-15070  | 1.0  | 1.0  | 0.0  | 1.0  | 1.0  | 0.0 |
| 21UR-150700 | 0.0  | 0.0  | 0.0  | 0.0  | 0.0  | 0.0 |
| 21UR-150710 | 0.0  | 0.0  | 0.0  | 0.0  | 0.0  | 0.0 |
| 21UR-150720 | 0.0  | 7.5  | 1.0  | 0.0  | 0.0  | 0.0 |
| 21UR-150730 | 0.0  | 0.0  | 0.0  | 0.0  | 0.0  | 0.0 |
| 21UR-150740 | 0.0  | 0.0  | 0.0  | 0.0  | 0.0  | 0.0 |
| 21UR-150750 | 17.0 | 0.0  | 10.0 | 3.0  | 0.0  | 0.0 |
| 21UR-150760 | 0.0  | 0.0  | 0.0  | 0.0  | 0.0  | 0.0 |
| 21UR-150770 | 13.0 | 41.0 | 12.0 | 11.0 | 43.0 | 2.0 |
| 21UR-150780 | 0.0  | 0.0  | 0.0  | 0.0  | 0.0  | 0.0 |
| 21UR-150790 | 0.0  | 0.0  | 0.0  | 0.0  | 0.0  | 0.0 |
| 21UR-15080  | 0.0  | 0.0  | 0.0  | 0.0  | 1.0  | 0.0 |
| 21UR-150800 | 0.0  | 0.0  | 0.0  | 0.0  | 0.0  | 0.0 |
| 21UR-150810 | 0.0  | 0.0  | 0.0  | 0.0  | 0.0  | 0.0 |
| 21UR-150820 | 0.0  | 0.0  | 0.0  | 0.0  | 0.0  | 0.0 |
| 21UR-150830 | 15.0 | 2.0  | 9.0  | 4.0  | 0.0  | 0.0 |
| 21UR-150840 | 0.0  | 0.0  | 0.0  | 0.0  | 0.0  | 0.0 |
| 21UR-150850 | 0.0  | 0.0  | 1.0  | 0.0  | 0.0  | 0.0 |
| 21UR-150860 | 2.0  | 0.0  | 8.0  | 0.0  | 2.0  | 0.0 |
| 21UR-150870 | 0.0  | 0.0  | 0.0  | 0.0  | 0.0  | 0.0 |
| 21UR-150880 | 0.0  | 0.0  | 0.0  | 0.0  | 0.0  | 0.0 |
| 21UR-150890 | 0.0  | 0.0  | 0.0  | 0.0  | 0.0  | 0.2 |
| 21UR-15090  | 0.0  | 0.0  | 0.0  | 0.0  | 0.0  | 0.0 |
| 21UR-150900 | 0.0  | 0.0  | 0.0  | 0.0  | 0.0  | 0.0 |
| 21UR-150910 | 9.0  | 6.0  | 7.0  | 1.0  | 12.0 | 2.0 |

|             |        |        |        |        |        |       |
|-------------|--------|--------|--------|--------|--------|-------|
| 21UR-150920 | 0.0    | 0.0    | 0.0    | 0.0    | 0.0    | 0.0   |
| 21UR-150930 | 0.0    | 0.0    | 1.0    | 0.0    | 0.0    | 0.0   |
| 21UR-150940 | 1040.0 | 76.3   | 758.5  | 430.5  | 166.0  | 10.0  |
| 21UR-150950 | 0.0    | 0.0    | 0.0    | 0.0    | 0.0    | 0.0   |
| 21UR-150960 | 5950.8 | 2556.0 | 4834.5 | 2057.6 | 1713.6 | 263.0 |
| 21UR-150970 | 0.0    | 0.0    | 0.0    | 0.0    | 0.0    | 0.0   |
| 21UR-150980 | 0.0    | 0.0    | 0.0    | 0.0    | 0.0    | 0.0   |
| 21UR-150990 | 0.0    | 0.0    | 0.0    | 0.0    | 0.0    | 0.0   |
| 21UR-1510   | 91.0   | 342.0  | 79.0   | 33.0   | 294.3  | 43.0  |
| 21UR-15100  | 4.0    | 0.0    | 0.0    | 0.0    | 0.0    | 0.0   |
| 21UR-151000 | 3.0    | 2.4    | 3.0    | 0.0    | 1.0    | 0.0   |
| 21UR-151010 | 0.0    | 0.0    | 0.0    | 0.0    | 0.0    | 0.0   |
| 21UR-151020 | 0.0    | 0.0    | 0.0    | 0.0    | 0.0    | 0.0   |
| 21UR-151030 | 0.0    | 0.0    | 0.0    | 0.0    | 0.0    | 0.0   |
| 21UR-151040 | 0.0    | 0.0    | 0.0    | 0.0    | 0.0    | 0.0   |
| 21UR-151050 | 5.0    | 4.0    | 7.0    | 2.0    | 13.0   | 0.0   |
| 21UR-151060 | 0.0    | 0.0    | 0.0    | 0.0    | 0.1    | 0.0   |
| 21UR-151070 | 0.0    | 0.0    | 0.0    | 0.0    | 0.0    | 0.0   |
| 21UR-151080 | 0.0    | 0.0    | 0.0    | 0.0    | 0.0    | 0.0   |
| 21UR-151090 | 0.0    | 0.0    | 0.0    | 0.0    | 0.0    | 0.0   |
| 21UR-151100 | 0.0    | 0.0    | 0.0    | 0.0    | 0.0    | 0.0   |
| 21UR-151110 | 0.0    | 0.0    | 0.0    | 0.0    | 0.0    | 0.0   |
| 21UR-151120 | 19.0   | 22.0   | 13.0   | 12.0   | 14.0   | 2.0   |
| 21UR-151130 | 0.0    | 1.0    | 0.0    | 1.0    | 0.0    | 0.0   |
| 21UR-151140 | 37.0   | 49.7   | 23.0   | 8.0    | 10.0   | 0.0   |
| 21UR-151150 | 0.0    | 0.0    | 0.0    | 0.0    | 0.0    | 0.0   |
| 21UR-151160 | 0.0    | 0.0    | 0.0    | 0.0    | 0.0    | 0.0   |
| 21UR-151170 | 0.0    | 6.0    | 1.0    | 0.0    | 3.0    | 0.0   |
| 21UR-151180 | 0.0    | 0.0    | 0.0    | 0.0    | 0.0    | 0.0   |
| 21UR-151190 | 1.0    | 0.0    | 0.0    | 0.0    | 1.0    | 0.0   |
| 21UR-15120  | 0.0    | 0.0    | 0.0    | 0.0    | 0.0    | 1.0   |
| 21UR-151200 | 0.0    | 0.0    | 0.0    | 0.0    | 0.0    | 0.0   |
| 21UR-151210 | 0.0    | 0.0    | 1.0    | 0.0    | 0.0    | 0.0   |
| 21UR-151220 | 0.0    | 0.0    | 0.0    | 0.0    | 0.0    | 0.0   |
| 21UR-151230 | 0.0    | 0.0    | 0.0    | 0.0    | 0.0    | 0.0   |
| 21UR-151240 | 23.0   | 3.0    | 12.0   | 7.0    | 8.0    | 1.0   |
| 21UR-151250 | 20.0   | 1.3    | 10.0   | 10.0   | 0.0    | 0.0   |
| 21UR-151260 | 0.0    | 0.0    | 0.0    | 0.0    | 0.0    | 0.0   |
| 21UR-151270 | 0.0    | 0.0    | 0.0    | 0.0    | 0.0    | 0.0   |
| 21UR-151280 | 1.0    | 0.0    | 1.0    | 0.0    | 2.0    | 0.0   |
| 21UR-151290 | 0.0    | 0.0    | 0.0    | 0.0    | 0.0    | 0.0   |
| 21UR-15130  | 0.0    | 0.0    | 0.0    | 0.0    | 1.0    | 0.0   |
| 21UR-151300 | 4.0    | 4.0    | 1.0    | 0.0    | 12.0   | 1.0   |
| 21UR-151310 | 6.0    | 0.0    | 5.0    | 2.0    | 2.0    | 0.0   |
| 21UR-151320 | 0.0    | 0.0    | 4.0    | 0.0    | 1.0    | 0.0   |
| 21UR-151330 | 0.0    | 0.0    | 0.0    | 0.0    | 0.0    | 0.0   |
| 21UR-151340 | 6.0    | 2.0    | 3.0    | 1.0    | 6.0    | 1.0   |
| 21UR-151350 | 1164.8 | 91.0   | 951.5  | 316.2  | 196.7  | 9.0   |
| 21UR-151360 | 0.0    | 0.0    | 0.0    | 0.0    | 0.0    | 0.0   |
| 21UR-151370 | 43.0   | 75.0   | 28.0   | 5.0    | 21.0   | 5.0   |
| 21UR-151380 | 0.0    | 0.0    | 0.0    | 0.0    | 0.0    | 0.0   |

|             |       |      |       |       |       |     |
|-------------|-------|------|-------|-------|-------|-----|
| 21UR-151390 | 0.0   | 0.0  | 0.0   | 0.0   | 0.0   | 0.0 |
| 21UR-15140  | 7.0   | 4.0  | 11.0  | 0.0   | 7.0   | 1.0 |
| 21UR-151400 | 0.0   | 0.0  | 0.0   | 0.0   | 0.0   | 0.0 |
| 21UR-151410 | 12.0  | 1.0  | 3.0   | 6.0   | 1.0   | 0.0 |
| 21UR-151420 | 14.0  | 21.0 | 23.0  | 6.0   | 35.5  | 2.0 |
| 21UR-151430 | 0.0   | 0.0  | 0.0   | 0.0   | 0.0   | 0.0 |
| 21UR-151440 | 0.0   | 1.0  | 0.0   | 0.0   | 0.0   | 0.0 |
| 21UR-151450 | 0.0   | 0.0  | 0.0   | 0.0   | 0.0   | 0.0 |
| 21UR-151460 | 0.0   | 0.0  | 0.0   | 0.0   | 0.0   | 0.0 |
| 21UR-151470 | 2.5   | 1.5  | 2.5   | 0.5   | 4.7   | 0.5 |
| 21UR-151480 | 0.0   | 0.0  | 0.0   | 0.0   | 0.0   | 0.0 |
| 21UR-151490 | 0.0   | 0.0  | 0.0   | 0.0   | 0.0   | 0.0 |
| 21UR-15150  | 1.0   | 1.0  | 1.0   | 1.0   | 2.7   | 0.0 |
| 21UR-151500 | 0.0   | 0.0  | 0.0   | 0.0   | 0.0   | 0.0 |
| 21UR-151510 | 0.0   | 0.0  | 0.0   | 0.0   | 0.0   | 0.0 |
| 21UR-151520 | 0.0   | 0.0  | 0.0   | 0.0   | 0.0   | 1.0 |
| 21UR-151530 | 0.0   | 0.0  | 0.0   | 0.0   | 0.0   | 0.0 |
| 21UR-151540 | 0.0   | 0.0  | 0.0   | 0.0   | 0.0   | 0.0 |
| 21UR-151550 | 0.0   | 0.0  | 0.0   | 0.0   | 0.0   | 0.0 |
| 21UR-151560 | 0.0   | 0.0  | 0.0   | 0.0   | 0.0   | 0.0 |
| 21UR-151570 | 37.0  | 7.0  | 24.0  | 7.0   | 9.0   | 0.0 |
| 21UR-151580 | 0.0   | 0.0  | 0.0   | 0.0   | 2.0   | 0.0 |
| 21UR-151590 | 0.0   | 0.0  | 0.0   | 0.0   | 0.1   | 0.0 |
| 21UR-15160  | 0.0   | 0.0  | 0.0   | 0.0   | 0.0   | 0.0 |
| 21UR-151600 | 0.0   | 0.0  | 0.0   | 0.0   | 0.0   | 0.0 |
| 21UR-151610 | 0.0   | 0.0  | 0.0   | 0.0   | 0.0   | 0.0 |
| 21UR-151620 | 0.0   | 0.0  | 0.0   | 0.0   | 0.0   | 0.0 |
| 21UR-151630 | 1.0   | 0.0  | 0.0   | 0.0   | 0.0   | 0.0 |
| 21UR-151640 | 0.0   | 0.0  | 0.0   | 0.0   | 0.0   | 0.0 |
| 21UR-151650 | 1.0   | 0.0  | 0.0   | 0.0   | 4.0   | 0.0 |
| 21UR-151660 | 2.0   | 2.0  | 0.0   | 0.0   | 2.0   | 0.0 |
| 21UR-151670 | 0.0   | 0.0  | 0.0   | 0.0   | 0.0   | 0.0 |
| 21UR-151680 | 0.0   | 0.0  | 0.0   | 0.0   | 1.0   | 0.0 |
| 21UR-151690 | 0.0   | 0.0  | 0.0   | 0.0   | 0.0   | 0.0 |
| 21UR-15170  | 456.5 | 24.0 | 322.0 | 178.5 | 208.3 | 2.0 |
| 21UR-151700 | 0.0   | 0.0  | 0.0   | 0.0   | 0.0   | 0.0 |
| 21UR-151710 | 20.0  | 1.0  | 17.0  | 4.0   | 2.0   | 0.0 |
| 21UR-151720 | 7.0   | 2.0  | 2.0   | 2.0   | 4.0   | 1.0 |
| 21UR-151730 | 0.0   | 0.0  | 0.0   | 0.0   | 0.0   | 0.0 |
| 21UR-151740 | 0.0   | 0.0  | 0.0   | 0.0   | 0.0   | 0.0 |
| 21UR-151750 | 1.0   | 5.0  | 1.0   | 1.5   | 0.0   | 0.0 |
| 21UR-151760 | 0.0   | 0.0  | 0.0   | 0.0   | 0.0   | 0.0 |
| 21UR-151770 | 4.3   | 4.0  | 6.0   | 1.0   | 3.0   | 0.0 |
| 21UR-151780 | 0.0   | 0.0  | 1.0   | 0.0   | 0.0   | 0.0 |
| 21UR-151790 | 0.0   | 0.0  | 2.0   | 0.0   | 0.0   | 0.0 |
| 21UR-15180  | 0.0   | 0.0  | 0.0   | 0.0   | 1.0   | 0.0 |
| 21UR-151800 | 0.0   | 0.0  | 0.0   | 0.0   | 0.0   | 0.0 |
| 21UR-151810 | 0.0   | 0.0  | 0.0   | 0.0   | 0.0   | 0.0 |
| 21UR-151820 | 0.0   | 0.0  | 0.0   | 0.0   | 0.0   | 0.0 |
| 21UR-151830 | 1.0   | 0.0  | 0.0   | 0.0   | 0.0   | 0.0 |
| 21UR-151840 | 0.0   | 0.0  | 0.0   | 0.0   | 0.0   | 0.0 |

|             |       |      |       |       |       |     |
|-------------|-------|------|-------|-------|-------|-----|
| 21UR-151850 | 0.0   | 0.0  | 0.0   | 0.0   | 0.0   | 0.0 |
| 21UR-151860 | 4.0   | 5.0  | 7.0   | 6.0   | 2.0   | 0.0 |
| 21UR-151870 | 0.0   | 0.0  | 0.0   | 0.0   | 0.0   | 0.0 |
| 21UR-151880 | 0.0   | 0.0  | 0.0   | 0.0   | 0.0   | 0.0 |
| 21UR-151890 | 0.0   | 1.0  | 0.0   | 0.0   | 2.0   | 0.0 |
| 21UR-15190  | 3.0   | 12.0 | 5.7   | 7.0   | 41.0  | 1.1 |
| 21UR-151900 | 0.0   | 0.0  | 0.0   | 0.0   | 1.0   | 0.0 |
| 21UR-151910 | 27.0  | 18.0 | 8.0   | 4.0   | 8.0   | 2.0 |
| 21UR-151920 | 0.0   | 0.0  | 0.0   | 0.0   | 0.0   | 0.0 |
| 21UR-151930 | 0.0   | 1.0  | 0.0   | 0.0   | 4.0   | 0.0 |
| 21UR-151940 | 0.0   | 0.0  | 0.0   | 0.0   | 0.0   | 0.0 |
| 21UR-151950 | 0.0   | 0.0  | 0.0   | 0.0   | 0.0   | 0.0 |
| 21UR-151960 | 1.0   | 0.0  | 0.0   | 0.0   | 0.0   | 0.0 |
| 21UR-151970 | 0.0   | 1.0  | 3.0   | 0.0   | 0.0   | 0.0 |
| 21UR-151980 | 0.0   | 0.0  | 0.0   | 0.0   | 0.0   | 0.0 |
| 21UR-151990 | 0.0   | 0.0  | 0.0   | 0.0   | 0.0   | 0.0 |
| 21UR-1520   | 1.0   | 0.0  | 1.0   | 0.0   | 1.0   | 0.0 |
| 21UR-15200  | 1.0   | 0.0  | 0.0   | 0.0   | 0.0   | 0.0 |
| 21UR-152000 | 0.0   | 0.0  | 0.0   | 0.0   | 0.0   | 1.0 |
| 21UR-152010 | 0.0   | 0.0  | 1.0   | 0.0   | 0.0   | 0.0 |
| 21UR-152020 | 0.0   | 0.0  | 0.0   | 0.0   | 0.0   | 0.1 |
| 21UR-152030 | 0.0   | 0.0  | 0.0   | 0.0   | 0.0   | 0.0 |
| 21UR-152040 | 21.0  | 9.0  | 5.0   | 2.0   | 4.0   | 0.0 |
| 21UR-152050 | 6.0   | 9.0  | 4.0   | 2.0   | 6.0   | 3.0 |
| 21UR-152060 | 0.0   | 1.0  | 1.0   | 0.0   | 0.0   | 0.0 |
| 21UR-152070 | 0.0   | 0.0  | 1.0   | 0.0   | 0.0   | 0.0 |
| 21UR-152080 | 0.0   | 0.0  | 0.0   | 0.0   | 0.0   | 0.0 |
| 21UR-152090 | 0.0   | 0.0  | 0.0   | 0.0   | 0.0   | 0.0 |
| 21UR-15210  | 0.0   | 0.0  | 0.0   | 0.0   | 0.0   | 0.0 |
| 21UR-152100 | 26.0  | 2.0  | 26.0  | 3.0   | 1.0   | 0.0 |
| 21UR-152110 | 1.0   | 3.0  | 3.0   | 1.0   | 0.0   | 0.0 |
| 21UR-152120 | 9.0   | 1.0  | 5.0   | 1.0   | 5.1   | 0.0 |
| 21UR-152130 | 0.0   | 0.0  | 0.0   | 0.0   | 0.0   | 0.0 |
| 21UR-152140 | 3.0   | 11.0 | 1.0   | 2.0   | 2.0   | 0.0 |
| 21UR-152150 | 204.4 | 50.0 | 195.0 | 117.0 | 118.0 | 3.0 |
| 21UR-152160 | 0.0   | 0.0  | 0.0   | 0.0   | 0.3   | 0.0 |
| 21UR-152170 | 28.8  | 5.0  | 12.0  | 2.0   | 1.0   | 2.0 |
| 21UR-152180 | 0.0   | 0.0  | 0.0   | 0.0   | 0.0   | 0.0 |
| 21UR-152190 | 0.0   | 2.0  | 0.0   | 0.0   | 3.0   | 0.0 |
| 21UR-15220  | 0.0   | 2.0  | 1.0   | 0.0   | 3.0   | 1.0 |
| 21UR-152200 | 2.0   | 0.0  | 2.0   | 0.0   | 1.0   | 0.0 |
| 21UR-152210 | 6.0   | 28.0 | 13.0  | 3.0   | 34.1  | 5.0 |
| 21UR-152220 | 2.0   | 0.0  | 0.0   | 0.0   | 0.0   | 0.0 |
| 21UR-152230 | 3.0   | 1.0  | 1.0   | 0.0   | 0.0   | 1.0 |
| 21UR-152240 | 32.0  | 14.0 | 49.0  | 8.0   | 27.0  | 0.0 |
| 21UR-152250 | 0.0   | 0.0  | 0.0   | 0.0   | 0.0   | 0.0 |
| 21UR-152260 | 0.0   | 0.0  | 0.0   | 0.0   | 1.0   | 0.0 |
| 21UR-152270 | 0.0   | 0.1  | 0.0   | 0.0   | 0.0   | 0.0 |
| 21UR-152280 | 4.0   | 11.0 | 8.0   | 0.0   | 8.0   | 2.0 |
| 21UR-152290 | 0.0   | 0.0  | 0.0   | 0.0   | 0.0   | 0.0 |
| 21UR-15230  | 0.0   | 0.0  | 0.0   | 0.0   | 0.0   | 0.0 |

|             |       |      |       |      |      |     |
|-------------|-------|------|-------|------|------|-----|
| 21UR-152300 | 0.0   | 0.0  | 0.0   | 0.0  | 0.0  | 0.0 |
| 21UR-152310 | 0.0   | 0.0  | 0.0   | 0.0  | 0.0  | 0.0 |
| 21UR-152320 | 0.0   | 0.0  | 0.0   | 0.0  | 0.0  | 0.0 |
| 21UR-152330 | 7.0   | 1.0  | 3.0   | 1.0  | 0.0  | 0.0 |
| 21UR-152340 | 2.0   | 0.0  | 0.0   | 0.0  | 0.0  | 1.0 |
| 21UR-152350 | 8.0   | 0.0  | 4.0   | 3.0  | 1.0  | 2.0 |
| 21UR-152360 | 0.0   | 0.0  | 0.0   | 0.0  | 0.0  | 0.0 |
| 21UR-152370 | 20.0  | 3.0  | 12.0  | 7.0  | 4.0  | 0.0 |
| 21UR-152380 | 0.0   | 0.0  | 0.0   | 0.0  | 0.0  | 0.0 |
| 21UR-152390 | 2.0   | 2.0  | 2.0   | 0.0  | 6.0  | 0.0 |
| 21UR-15240  | 1.0   | 0.0  | 0.0   | 0.0  | 0.0  | 0.0 |
| 21UR-152400 | 1.0   | 1.0  | 1.0   | 0.0  | 4.0  | 1.0 |
| 21UR-152410 | 0.0   | 0.6  | 2.0   | 0.0  | 1.0  | 0.0 |
| 21UR-152420 | 0.0   | 0.0  | 0.0   | 0.0  | 0.0  | 0.0 |
| 21UR-152430 | 0.0   | 0.0  | 0.0   | 0.0  | 0.0  | 0.0 |
| 21UR-152440 | 0.0   | 0.0  | 0.0   | 0.0  | 0.0  | 0.0 |
| 21UR-152450 | 0.0   | 0.0  | 0.0   | 0.0  | 1.0  | 0.0 |
| 21UR-152460 | 0.0   | 0.0  | 0.0   | 0.0  | 0.0  | 0.0 |
| 21UR-152470 | 0.0   | 0.0  | 0.0   | 0.0  | 0.0  | 0.0 |
| 21UR-152480 | 0.0   | 0.0  | 0.0   | 0.0  | 0.0  | 0.0 |
| 21UR-152490 | 0.0   | 0.0  | 0.0   | 0.0  | 0.0  | 0.0 |
| 21UR-15250  | 0.0   | 0.0  | 0.0   | 0.0  | 0.5  | 0.0 |
| 21UR-152500 | 0.0   | 1.0  | 0.0   | 0.0  | 3.0  | 0.0 |
| 21UR-152510 | 0.0   | 0.0  | 0.0   | 0.0  | 0.0  | 0.0 |
| 21UR-152520 | 0.0   | 0.0  | 0.0   | 0.0  | 0.0  | 0.0 |
| 21UR-152530 | 0.0   | 0.0  | 0.0   | 0.0  | 0.0  | 0.0 |
| 21UR-152540 | 1.0   | 1.0  | 0.0   | 0.0  | 0.0  | 0.0 |
| 21UR-152550 | 162.0 | 15.0 | 104.0 | 64.0 | 44.0 | 2.0 |
| 21UR-152560 | 0.0   | 0.0  | 0.0   | 0.0  | 0.0  | 0.0 |
| 21UR-152570 | 0.0   | 0.0  | 0.0   | 0.0  | 0.4  | 0.0 |
| 21UR-152580 | 0.0   | 0.0  | 0.0   | 0.0  | 0.0  | 0.0 |
| 21UR-152590 | 0.0   | 0.0  | 0.0   | 0.0  | 0.0  | 0.0 |
| 21UR-15260  | 4.0   | 0.0  | 0.0   | 0.0  | 0.0  | 0.0 |
| 21UR-152600 | 0.0   | 0.0  | 0.0   | 0.0  | 0.0  | 0.0 |
| 21UR-152610 | 0.0   | 0.0  | 0.0   | 0.0  | 0.0  | 0.0 |
| 21UR-152620 | 0.0   | 0.0  | 0.0   | 0.0  | 0.0  | 0.0 |
| 21UR-152630 | 0.0   | 0.0  | 0.0   | 0.0  | 0.0  | 0.0 |
| 21UR-152640 | 0.0   | 0.0  | 0.0   | 0.0  | 0.0  | 0.0 |
| 21UR-152650 | 0.0   | 0.0  | 0.0   | 0.0  | 0.0  | 0.0 |
| 21UR-152660 | 0.0   | 0.3  | 0.0   | 0.0  | 0.0  | 0.4 |
| 21UR-152670 | 0.0   | 0.0  | 0.0   | 0.0  | 0.0  | 0.0 |
| 21UR-152680 | 0.0   | 0.0  | 0.0   | 0.0  | 0.0  | 0.0 |
| 21UR-152690 | 0.0   | 0.0  | 0.0   | 0.0  | 0.0  | 0.0 |
| 21UR-15270  | 1.0   | 0.0  | 0.0   | 1.0  | 0.0  | 0.0 |
| 21UR-152700 | 0.0   | 0.0  | 0.0   | 0.0  | 0.0  | 0.0 |
| 21UR-152710 | 0.0   | 0.0  | 0.0   | 0.0  | 0.0  | 0.0 |
| 21UR-152720 | 0.0   | 0.0  | 0.0   | 0.0  | 0.0  | 0.0 |
| 21UR-152730 | 0.0   | 0.0  | 0.0   | 0.0  | 1.0  | 0.0 |
| 21UR-152740 | 0.0   | 0.0  | 0.0   | 0.0  | 0.0  | 0.0 |
| 21UR-152750 | 0.0   | 0.0  | 0.0   | 0.0  | 0.0  | 0.0 |
| 21UR-152760 | 0.0   | 0.0  | 0.0   | 0.0  | 0.0  | 0.0 |

|             |      |     |      |     |      |     |
|-------------|------|-----|------|-----|------|-----|
| 21UR-152770 | 0.0  | 1.0 | 2.0  | 1.0 | 1.0  | 0.0 |
| 21UR-152780 | 0.0  | 0.0 | 1.0  | 0.0 | 3.0  | 0.0 |
| 21UR-152790 | 0.0  | 0.0 | 0.0  | 0.0 | 0.0  | 0.0 |
| 21UR-15280  | 6.0  | 0.0 | 2.0  | 0.0 | 8.0  | 0.0 |
| 21UR-152800 | 0.0  | 0.0 | 4.0  | 0.0 | 0.0  | 0.0 |
| 21UR-152810 | 0.0  | 0.0 | 0.0  | 0.0 | 0.0  | 0.0 |
| 21UR-152820 | 0.0  | 0.0 | 0.0  | 0.0 | 0.0  | 0.0 |
| 21UR-152830 | 0.0  | 0.0 | 0.0  | 0.0 | 0.0  | 0.0 |
| 21UR-152840 | 0.0  | 0.0 | 0.0  | 0.0 | 0.0  | 0.0 |
| 21UR-152850 | 0.0  | 0.0 | 0.0  | 0.0 | 0.0  | 0.0 |
| 21UR-152860 | 1.0  | 0.0 | 0.0  | 0.0 | 0.0  | 0.0 |
| 21UR-152870 | 0.0  | 0.0 | 0.0  | 1.0 | 0.0  | 0.0 |
| 21UR-152880 | 0.0  | 0.0 | 0.0  | 0.0 | 0.0  | 0.0 |
| 21UR-152890 | 79.0 | 6.0 | 62.5 | 9.0 | 7.5  | 1.0 |
| 21UR-15290  | 4.0  | 0.0 | 4.0  | 0.0 | 1.0  | 0.0 |
| 21UR-152900 | 0.0  | 0.0 | 0.0  | 0.0 | 0.0  | 0.0 |
| 21UR-152910 | 0.0  | 0.0 | 0.0  | 0.0 | 0.0  | 0.0 |
| 21UR-152920 | 0.0  | 0.0 | 0.0  | 0.0 | 0.0  | 0.0 |
| 21UR-152930 | 0.0  | 0.0 | 0.0  | 0.0 | 0.0  | 0.0 |
| 21UR-152940 | 0.0  | 0.0 | 0.0  | 0.0 | 1.0  | 1.0 |
| 21UR-152950 | 0.0  | 0.0 | 0.0  | 0.0 | 0.0  | 0.0 |
| 21UR-152960 | 0.0  | 1.0 | 0.0  | 0.0 | 0.0  | 0.0 |
| 21UR-152970 | 0.0  | 0.0 | 0.0  | 0.0 | 0.0  | 0.0 |
| 21UR-152980 | 0.0  | 0.0 | 0.0  | 0.0 | 0.0  | 0.0 |
| 21UR-152990 | 1.0  | 1.1 | 5.0  | 1.0 | 0.0  | 0.0 |
| 21UR-1530   | 6.0  | 1.0 | 6.0  | 0.0 | 4.0  | 0.0 |
| 21UR-15300  | 4.0  | 0.0 | 2.0  | 0.0 | 1.0  | 0.0 |
| 21UR-153000 | 12.0 | 2.0 | 5.0  | 2.0 | 4.0  | 1.0 |
| 21UR-153010 | 0.0  | 0.0 | 0.0  | 0.0 | 0.0  | 0.0 |
| 21UR-153020 | 0.0  | 0.0 | 0.0  | 0.0 | 0.0  | 0.0 |
| 21UR-153030 | 8.0  | 9.0 | 9.0  | 0.0 | 31.5 | 2.0 |
| 21UR-153040 | 0.0  | 2.0 | 0.0  | 0.0 | 0.0  | 0.0 |
| 21UR-153050 | 1.0  | 1.0 | 0.0  | 0.0 | 2.0  | 0.0 |
| 21UR-153060 | 7.0  | 3.0 | 5.0  | 0.0 | 6.0  | 1.0 |
| 21UR-153070 | 22.5 | 0.0 | 19.0 | 5.0 | 2.0  | 0.0 |
| 21UR-153080 | 0.0  | 0.0 | 0.0  | 0.0 | 4.0  | 0.0 |
| 21UR-153090 | 0.0  | 1.0 | 0.0  | 0.0 | 0.0  | 0.0 |
| 21UR-15310  | 0.0  | 0.0 | 0.0  | 0.0 | 0.0  | 0.0 |
| 21UR-153100 | 0.0  | 0.0 | 0.0  | 0.0 | 0.0  | 0.0 |
| 21UR-153110 | 2.0  | 1.0 | 1.0  | 0.0 | 3.0  | 0.0 |
| 21UR-153120 | 0.0  | 0.0 | 0.0  | 0.0 | 0.0  | 0.0 |
| 21UR-153130 | 0.0  | 0.0 | 0.0  | 0.0 | 0.0  | 0.0 |
| 21UR-153140 | 0.0  | 0.0 | 0.0  | 0.0 | 1.0  | 0.0 |
| 21UR-153150 | 0.0  | 0.0 | 0.0  | 0.0 | 0.0  | 0.0 |
| 21UR-153160 | 0.0  | 0.0 | 0.0  | 0.0 | 0.0  | 0.0 |
| 21UR-153170 | 0.0  | 0.0 | 0.0  | 0.0 | 0.0  | 0.0 |
| 21UR-153180 | 1.0  | 0.0 | 1.0  | 0.0 | 0.0  | 0.0 |
| 21UR-153190 | 0.0  | 0.0 | 0.0  | 0.0 | 0.0  | 0.0 |
| 21UR-15320  | 1.0  | 1.0 | 4.0  | 3.0 | 0.0  | 0.0 |
| 21UR-153200 | 0.0  | 0.0 | 0.0  | 0.0 | 0.0  | 0.0 |
| 21UR-153210 | 0.0  | 0.0 | 0.0  | 0.0 | 0.0  | 0.0 |

|             |       |      |       |       |       |     |
|-------------|-------|------|-------|-------|-------|-----|
| 21UR-153220 | 1.0   | 0.0  | 0.0   | 0.0   | 0.0   | 0.0 |
| 21UR-153230 | 0.0   | 0.0  | 0.0   | 0.0   | 0.0   | 0.0 |
| 21UR-153240 | 0.0   | 0.0  | 0.0   | 0.0   | 0.0   | 0.0 |
| 21UR-153250 | 18.0  | 4.0  | 16.0  | 8.0   | 5.0   | 0.0 |
| 21UR-153260 | 0.0   | 0.0  | 0.0   | 0.0   | 0.0   | 0.0 |
| 21UR-153270 | 0.0   | 0.0  | 0.0   | 0.0   | 0.0   | 0.0 |
| 21UR-153280 | 0.0   | 0.0  | 0.0   | 0.0   | 0.0   | 0.0 |
| 21UR-153290 | 1.0   | 0.0  | 0.0   | 0.0   | 0.0   | 0.0 |
| 21UR-15330  | 4.0   | 0.0  | 2.0   | 1.0   | 1.0   | 0.0 |
| 21UR-153300 | 0.0   | 0.0  | 0.0   | 0.0   | 0.0   | 0.0 |
| 21UR-153310 | 18.0  | 6.0  | 11.0  | 10.0  | 12.0  | 0.0 |
| 21UR-153320 | 0.0   | 0.0  | 0.0   | 0.0   | 0.0   | 0.0 |
| 21UR-153330 | 0.0   | 0.0  | 0.0   | 0.0   | 0.0   | 0.0 |
| 21UR-153340 | 230.0 | 8.0  | 225.0 | 115.0 | 12.0  | 0.0 |
| 21UR-153350 | 0.0   | 0.0  | 0.0   | 0.0   | 1.0   | 0.0 |
| 21UR-153360 | 0.0   | 0.0  | 0.0   | 0.0   | 0.0   | 0.0 |
| 21UR-153370 | 0.0   | 0.0  | 0.0   | 0.0   | 0.0   | 0.0 |
| 21UR-153380 | 7.0   | 10.0 | 7.0   | 3.0   | 19.0  | 1.0 |
| 21UR-153390 | 0.0   | 0.0  | 0.0   | 0.0   | 0.0   | 0.0 |
| 21UR-15340  | 0.0   | 0.0  | 0.0   | 0.0   | 1.0   | 0.0 |
| 21UR-153400 | 0.0   | 0.0  | 0.0   | 0.0   | 0.0   | 0.0 |
| 21UR-153410 | 8.0   | 0.0  | 7.0   | 4.0   | 3.0   | 0.0 |
| 21UR-153420 | 0.0   | 0.0  | 0.0   | 0.0   | 0.0   | 0.0 |
| 21UR-153430 | 0.0   | 0.0  | 0.0   | 0.0   | 0.0   | 0.0 |
| 21UR-153440 | 0.0   | 0.0  | 0.0   | 0.0   | 0.0   | 0.0 |
| 21UR-153450 | 0.0   | 0.0  | 0.0   | 0.0   | 0.0   | 0.0 |
| 21UR-153460 | 0.0   | 0.0  | 0.0   | 0.0   | 0.0   | 0.0 |
| 21UR-153470 | 0.0   | 0.0  | 0.0   | 0.0   | 0.0   | 0.0 |
| 21UR-153480 | 8.0   | 1.0  | 3.0   | 2.0   | 2.0   | 0.0 |
| 21UR-153490 | 0.0   | 1.0  | 0.0   | 0.0   | 0.0   | 0.0 |
| 21UR-15350  | 1.0   | 10.0 | 2.0   | 4.0   | 4.0   | 0.0 |
| 21UR-153500 | 0.0   | 0.0  | 0.0   | 0.0   | 0.0   | 0.0 |
| 21UR-153510 | 1.0   | 0.0  | 4.0   | 1.0   | 4.0   | 0.1 |
| 21UR-153520 | 0.0   | 0.0  | 0.0   | 0.0   | 0.0   | 0.0 |
| 21UR-153530 | 11.0  | 1.0  | 16.0  | 6.0   | 0.0   | 0.1 |
| 21UR-153540 | 0.0   | 0.0  | 0.0   | 0.0   | 0.0   | 0.0 |
| 21UR-153550 | 0.0   | 0.0  | 0.0   | 0.0   | 0.0   | 0.0 |
| 21UR-153560 | 3.0   | 3.0  | 7.0   | 0.0   | 2.0   | 0.0 |
| 21UR-153570 | 1.0   | 0.0  | 0.0   | 0.0   | 0.0   | 0.0 |
| 21UR-153580 | 4.0   | 1.0  | 5.0   | 1.0   | 0.0   | 0.0 |
| 21UR-153590 | 0.0   | 0.0  | 1.0   | 0.0   | 0.0   | 0.0 |
| 21UR-15360  | 0.0   | 4.0  | 0.0   | 0.0   | 1.0   | 0.0 |
| 21UR-153600 | 29.0  | 23.0 | 22.0  | 11.0  | 28.5  | 4.0 |
| 21UR-153610 | 0.0   | 0.0  | 0.0   | 0.0   | 0.0   | 0.0 |
| 21UR-153620 | 0.0   | 0.0  | 0.0   | 0.0   | 0.0   | 0.0 |
| 21UR-153630 | 0.0   | 0.0  | 0.0   | 0.0   | 0.0   | 0.0 |
| 21UR-153640 | 0.0   | 0.0  | 0.0   | 0.0   | 0.0   | 0.0 |
| 21UR-153650 | 0.0   | 0.0  | 0.0   | 0.0   | 0.0   | 0.0 |
| 21UR-153660 | 584.5 | 76.6 | 519.0 | 291.3 | 123.8 | 7.4 |
| 21UR-153670 | 0.0   | 0.0  | 1.0   | 0.0   | 6.0   | 1.0 |
| 21UR-153680 | 0.0   | 0.0  | 0.0   | 0.0   | 0.0   | 0.0 |

|             |      |     |      |      |      |     |
|-------------|------|-----|------|------|------|-----|
| 21UR-153690 | 0.0  | 0.0 | 0.0  | 0.0  | 0.0  | 0.0 |
| 21UR-15370  | 0.0  | 3.0 | 1.0  | 1.0  | 4.0  | 0.0 |
| 21UR-153700 | 0.0  | 0.0 | 0.0  | 0.0  | 0.0  | 0.0 |
| 21UR-153710 | 0.0  | 3.0 | 0.0  | 1.0  | 0.0  | 0.0 |
| 21UR-153720 | 0.0  | 0.0 | 0.0  | 0.0  | 0.0  | 0.0 |
| 21UR-153730 | 0.0  | 0.0 | 0.0  | 0.0  | 0.0  | 0.0 |
| 21UR-153740 | 0.0  | 0.0 | 2.0  | 0.0  | 0.0  | 1.0 |
| 21UR-153750 | 0.0  | 0.0 | 1.0  | 0.0  | 0.0  | 0.0 |
| 21UR-153760 | 0.0  | 0.0 | 1.0  | 0.0  | 0.0  | 0.0 |
| 21UR-153770 | 0.0  | 0.0 | 0.0  | 0.0  | 0.0  | 0.0 |
| 21UR-153780 | 69.0 | 9.0 | 63.0 | 11.0 | 14.5 | 2.0 |
| 21UR-153790 | 0.0  | 0.0 | 0.0  | 0.0  | 0.0  | 0.0 |
| 21UR-153800 | 0.0  | 0.0 | 0.0  | 0.0  | 0.0  | 0.0 |
| 21UR-153810 | 0.0  | 0.0 | 0.0  | 0.0  | 0.0  | 0.0 |
| 21UR-153820 | 1.0  | 1.0 | 1.0  | 0.0  | 0.0  | 0.0 |
| 21UR-153830 | 0.0  | 0.0 | 0.0  | 0.0  | 0.0  | 0.0 |
| 21UR-153840 | 1.0  | 0.0 | 0.0  | 0.0  | 0.0  | 0.0 |
| 21UR-153850 | 0.0  | 0.0 | 0.0  | 0.0  | 0.0  | 0.0 |
| 21UR-153860 | 0.0  | 0.0 | 0.0  | 0.0  | 0.0  | 0.0 |
| 21UR-153870 | 0.0  | 0.0 | 0.0  | 0.0  | 0.0  | 0.0 |
| 21UR-153880 | 0.0  | 0.0 | 0.0  | 0.0  | 0.0  | 0.0 |
| 21UR-153890 | 0.0  | 0.0 | 0.0  | 0.0  | 0.0  | 0.0 |
| 21UR-15390  | 0.0  | 2.0 | 0.0  | 0.0  | 0.0  | 0.0 |
| 21UR-153900 | 0.0  | 1.0 | 1.0  | 0.0  | 3.0  | 1.0 |
| 21UR-153910 | 1.5  | 0.5 | 10.0 | 1.0  | 0.0  | 0.0 |
| 21UR-153920 | 0.0  | 0.0 | 0.0  | 0.0  | 1.0  | 0.0 |
| 21UR-153930 | 0.0  | 0.0 | 0.0  | 0.0  | 2.0  | 0.0 |
| 21UR-153940 | 1.0  | 0.0 | 0.0  | 0.0  | 0.0  | 0.0 |
| 21UR-153950 | 0.0  | 0.0 | 0.0  | 0.0  | 0.0  | 0.0 |
| 21UR-153960 | 0.0  | 0.0 | 0.0  | 0.0  | 0.0  | 0.0 |
| 21UR-153970 | 0.0  | 0.0 | 0.0  | 0.0  | 0.0  | 0.0 |
| 21UR-153980 | 0.0  | 0.0 | 0.0  | 0.0  | 0.0  | 0.0 |
| 21UR-153990 | 1.0  | 0.0 | 0.0  | 0.0  | 1.0  | 0.0 |
| 21UR-1540   | 0.0  | 0.0 | 1.0  | 0.0  | 0.0  | 0.0 |
| 21UR-15400  | 0.0  | 0.0 | 0.0  | 0.0  | 0.0  | 0.0 |
| 21UR-154000 | 0.0  | 0.0 | 0.0  | 0.0  | 0.0  | 0.0 |
| 21UR-154010 | 27.0 | 1.0 | 15.0 | 6.0  | 1.0  | 0.0 |
| 21UR-154020 | 0.0  | 0.0 | 0.0  | 0.0  | 0.0  | 0.0 |
| 21UR-154030 | 1.0  | 0.0 | 0.0  | 0.0  | 0.0  | 0.0 |
| 21UR-154040 | 0.0  | 0.0 | 0.0  | 0.0  | 1.0  | 0.0 |
| 21UR-154050 | 0.0  | 0.0 | 0.0  | 0.0  | 0.0  | 0.0 |
| 21UR-154060 | 5.0  | 0.0 | 0.0  | 0.0  | 1.0  | 0.0 |
| 21UR-154070 | 7.0  | 3.0 | 5.0  | 0.0  | 6.0  | 1.0 |
| 21UR-154080 | 0.0  | 0.0 | 0.0  | 0.0  | 0.0  | 0.0 |
| 21UR-154090 | 1.0  | 3.0 | 2.0  | 1.0  | 1.0  | 1.0 |
| 21UR-15410  | 0.0  | 0.0 | 0.0  | 0.0  | 0.0  | 0.0 |
| 21UR-154100 | 0.0  | 0.0 | 0.0  | 0.0  | 0.0  | 0.0 |
| 21UR-154110 | 0.0  | 0.0 | 0.0  | 0.0  | 0.0  | 0.0 |
| 21UR-154120 | 0.0  | 0.0 | 0.0  | 0.0  | 0.0  | 0.0 |
| 21UR-154130 | 0.0  | 0.0 | 0.0  | 0.0  | 0.0  | 0.0 |
| 21UR-154140 | 1.0  | 0.0 | 0.0  | 0.0  | 0.0  | 0.0 |



|             |       |      |       |      |      |     |
|-------------|-------|------|-------|------|------|-----|
| 21UR-154150 | 0.0   | 0.0  | 0.0   | 0.0  | 0.0  | 0.0 |
| 21UR-154160 | 11.0  | 4.0  | 11.0  | 3.0  | 0.0  | 0.0 |
| 21UR-154170 | 0.0   | 0.0  | 0.0   | 0.0  | 0.0  | 0.0 |
| 21UR-154180 | 0.0   | 0.0  | 0.0   | 0.0  | 0.1  | 0.0 |
| 21UR-154190 | 0.0   | 4.0  | 0.0   | 0.0  | 2.0  | 0.0 |
| 21UR-15420  | 0.0   | 0.0  | 0.0   | 0.0  | 0.0  | 0.0 |
| 21UR-154200 | 0.0   | 0.0  | 0.0   | 0.0  | 0.0  | 0.0 |
| 21UR-154210 | 164.0 | 17.0 | 102.0 | 64.0 | 46.0 | 2.0 |
| 21UR-154220 | 0.0   | 0.0  | 0.0   | 1.0  | 2.0  | 0.0 |
| 21UR-154230 | 0.0   | 0.0  | 0.0   | 0.0  | 0.0  | 0.0 |
| 21UR-154240 | 0.0   | 0.0  | 0.0   | 0.0  | 0.0  | 0.0 |
| 21UR-154250 | 0.0   | 0.0  | 0.0   | 0.0  | 0.0  | 0.0 |
| 21UR-154260 | 0.0   | 0.0  | 0.0   | 0.0  | 0.0  | 0.0 |
| 21UR-154270 | 0.0   | 1.0  | 1.0   | 0.0  | 0.0  | 0.0 |
| 21UR-154280 | 0.0   | 0.0  | 0.0   | 0.0  | 0.0  | 0.0 |
| 21UR-154290 | 0.0   | 0.0  | 0.0   | 0.0  | 0.0  | 0.0 |
| 21UR-15430  | 0.0   | 0.0  | 0.0   | 0.0  | 0.0  | 0.0 |
| 21UR-154300 | 0.0   | 0.0  | 0.0   | 0.0  | 0.0  | 0.0 |
| 21UR-154310 | 0.0   | 0.0  | 0.0   | 0.0  | 0.0  | 0.0 |
| 21UR-154320 | 0.0   | 0.0  | 0.0   | 0.0  | 0.0  | 0.0 |
| 21UR-154330 | 0.0   | 0.0  | 0.0   | 0.0  | 0.0  | 0.0 |
| 21UR-154340 | 0.0   | 0.0  | 0.0   | 0.0  | 1.0  | 0.0 |
| 21UR-154350 | 0.0   | 0.0  | 0.0   | 0.0  | 0.0  | 0.0 |
| 21UR-154360 | 0.0   | 1.0  | 0.0   | 0.0  | 0.0  | 0.0 |
| 21UR-154370 | 0.0   | 1.0  | 0.0   | 0.0  | 2.0  | 0.0 |
| 21UR-154380 | 1.0   | 0.0  | 0.0   | 0.0  | 0.0  | 0.0 |
| 21UR-154390 | 3.5   | 0.0  | 0.0   | 0.0  | 0.0  | 0.0 |
| 21UR-154400 | 1.0   | 0.0  | 0.0   | 1.0  | 1.0  | 0.0 |
| 21UR-154410 | 0.0   | 0.0  | 0.0   | 0.0  | 0.0  | 0.0 |
| 21UR-154420 | 0.0   | 0.0  | 0.0   | 0.0  | 0.0  | 0.0 |
| 21UR-154430 | 0.0   | 0.0  | 0.0   | 0.0  | 1.0  | 0.0 |
| 21UR-154440 | 0.0   | 1.0  | 1.0   | 0.0  | 2.0  | 0.0 |
| 21UR-154450 | 1.0   | 0.0  | 0.0   | 0.0  | 0.0  | 0.0 |
| 21UR-154460 | 0.0   | 0.0  | 0.0   | 0.0  | 0.0  | 0.0 |
| 21UR-154470 | 0.0   | 0.0  | 0.0   | 0.0  | 0.0  | 0.0 |
| 21UR-154480 | 0.0   | 0.0  | 0.0   | 0.0  | 0.0  | 0.0 |
| 21UR-154490 | 0.0   | 0.0  | 0.0   | 0.0  | 0.0  | 0.0 |
| 21UR-154500 | 0.0   | 0.0  | 0.0   | 0.0  | 0.0  | 0.0 |
| 21UR-154510 | 0.0   | 0.0  | 0.0   | 0.0  | 1.0  | 0.0 |
| 21UR-154520 | 52.0  | 5.0  | 42.0  | 7.0  | 13.0 | 1.0 |
| 21UR-154530 | 4.0   | 1.0  | 3.0   | 0.0  | 0.0  | 0.2 |
| 21UR-154540 | 0.0   | 0.0  | 0.0   | 0.0  | 0.0  | 0.0 |
| 21UR-154550 | 0.0   | 0.0  | 0.0   | 0.0  | 0.0  | 0.0 |
| 21UR-154560 | 0.0   | 1.0  | 0.0   | 0.0  | 0.0  | 0.0 |
| 21UR-154570 | 0.0   | 0.0  | 0.0   | 0.0  | 0.0  | 0.0 |
| 21UR-154580 | 1.0   | 0.0  | 1.0   | 0.0  | 0.0  | 0.0 |
| 21UR-154590 | 207.3 | 20.0 | 196.8 | 80.0 | 16.0 | 7.0 |
| 21UR-15460  | 0.0   | 0.0  | 0.0   | 0.0  | 0.0  | 0.0 |
| 21UR-154600 | 0.0   | 0.0  | 1.0   | 0.0  | 0.0  | 0.0 |
| 21UR-154610 | 1.0   | 0.0  | 1.0   | 0.0  | 0.0  | 0.0 |
| 21UR-154620 | 0.0   | 0.0  | 0.0   | 0.0  | 0.0  | 0.0 |

|             |       |      |      |      |      |     |
|-------------|-------|------|------|------|------|-----|
| 21UR-154630 | 0.0   | 0.0  | 0.0  | 0.0  | 0.0  | 0.0 |
| 21UR-154640 | 0.0   | 1.0  | 0.0  | 1.0  | 0.0  | 1.0 |
| 21UR-154650 | 0.0   | 0.0  | 0.0  | 0.0  | 1.0  | 0.0 |
| 21UR-154660 | 3.0   | 1.0  | 4.0  | 1.0  | 4.0  | 2.0 |
| 21UR-154670 | 0.0   | 0.0  | 0.0  | 0.0  | 0.0  | 0.0 |
| 21UR-154680 | 106.0 | 29.0 | 57.0 | 35.0 | 29.0 | 1.0 |
| 21UR-154690 | 92.0  | 4.0  | 56.0 | 19.0 | 11.0 | 2.0 |
| 21UR-15470  | 26.0  | 8.0  | 53.0 | 21.0 | 41.5 | 1.0 |
| 21UR-154700 | 49.3  | 3.0  | 13.0 | 7.0  | 11.0 | 2.0 |
| 21UR-154710 | 0.0   | 0.0  | 0.0  | 0.0  | 0.0  | 0.0 |
| 21UR-154720 | 0.0   | 1.0  | 0.0  | 0.0  | 0.0  | 0.0 |
| 21UR-154730 | 0.0   | 0.0  | 0.0  | 0.0  | 0.0  | 0.0 |
| 21UR-154740 | 0.0   | 0.0  | 2.0  | 0.0  | 0.0  | 0.0 |
| 21UR-154750 | 0.0   | 0.0  | 0.0  | 0.0  | 0.0  | 0.0 |
| 21UR-154760 | 0.0   | 0.3  | 0.0  | 0.0  | 0.0  | 0.0 |
| 21UR-154770 | 0.0   | 1.0  | 1.0  | 0.0  | 1.0  | 0.0 |
| 21UR-154780 | 0.0   | 0.0  | 0.0  | 0.0  | 0.0  | 0.0 |
| 21UR-154790 | 0.0   | 0.0  | 0.0  | 0.0  | 0.0  | 0.0 |
| 21UR-15480  | 0.0   | 0.0  | 0.0  | 0.0  | 0.0  | 0.0 |
| 21UR-154800 | 7.0   | 3.0  | 9.0  | 1.0  | 2.0  | 0.0 |
| 21UR-154810 | 0.0   | 1.0  | 1.0  | 0.0  | 0.0  | 0.0 |
| 21UR-154820 | 0.0   | 0.0  | 0.0  | 0.0  | 0.0  | 0.0 |
| 21UR-154830 | 0.0   | 0.0  | 0.0  | 0.0  | 0.0  | 0.0 |
| 21UR-154840 | 1.0   | 0.0  | 4.0  | 0.0  | 0.0  | 0.0 |
| 21UR-154850 | 0.0   | 0.0  | 8.0  | 0.0  | 0.0  | 0.0 |
| 21UR-154860 | 0.0   | 0.3  | 0.0  | 0.0  | 0.0  | 0.0 |
| 21UR-154870 | 0.0   | 0.0  | 0.0  | 0.0  | 0.0  | 0.0 |
| 21UR-154880 | 0.0   | 0.0  | 0.0  | 0.0  | 0.0  | 0.0 |
| 21UR-154890 | 38.0  | 3.0  | 37.0 | 13.0 | 12.0 | 0.0 |
| 21UR-15490  | 1.0   | 1.0  | 0.0  | 0.0  | 0.0  | 0.0 |
| 21UR-154900 | 9.0   | 2.0  | 6.0  | 2.0  | 0.0  | 1.0 |
| 21UR-154910 | 0.0   | 0.0  | 0.0  | 0.0  | 0.0  | 0.0 |
| 21UR-154920 | 0.0   | 0.0  | 0.0  | 0.0  | 2.0  | 0.0 |
| 21UR-154930 | 0.0   | 0.0  | 0.0  | 0.0  | 0.0  | 0.0 |
| 21UR-154940 | 0.0   | 0.0  | 0.0  | 0.0  | 0.0  | 0.0 |
| 21UR-154950 | 0.0   | 0.0  | 0.0  | 0.0  | 1.0  | 0.0 |
| 21UR-154960 | 0.0   | 0.0  | 0.0  | 0.0  | 0.0  | 0.0 |
| 21UR-154970 | 0.0   | 0.0  | 0.0  | 0.0  | 0.0  | 0.0 |
| 21UR-154980 | 0.0   | 1.2  | 0.0  | 0.0  | 0.0  | 1.0 |
| 21UR-154990 | 0.0   | 0.0  | 0.0  | 0.0  | 0.0  | 0.0 |
| 21UR-1550   | 12.0  | 0.0  | 22.0 | 6.0  | 12.0 | 1.0 |
| 21UR-15500  | 1.0   | 2.0  | 0.0  | 0.0  | 4.0  | 0.0 |
| 21UR-155000 | 0.0   | 0.0  | 0.0  | 0.0  | 0.0  | 0.0 |
| 21UR-155010 | 0.0   | 0.0  | 0.0  | 0.0  | 0.0  | 0.0 |
| 21UR-155020 | 0.0   | 0.0  | 0.0  | 0.0  | 0.0  | 0.0 |
| 21UR-155030 | 0.0   | 1.0  | 0.0  | 0.0  | 0.0  | 0.0 |
| 21UR-155040 | 0.0   | 0.0  | 0.0  | 0.0  | 0.0  | 0.0 |
| 21UR-155050 | 0.0   | 0.0  | 0.0  | 0.0  | 0.0  | 0.0 |
| 21UR-155060 | 0.0   | 3.0  | 0.0  | 0.0  | 0.0  | 0.0 |
| 21UR-155070 | 0.0   | 0.0  | 0.0  | 0.0  | 0.0  | 0.0 |
| 21UR-155080 | 0.0   | 0.0  | 0.0  | 0.0  | 0.0  | 0.0 |

|             |     |     |     |     |     |     |
|-------------|-----|-----|-----|-----|-----|-----|
| 21UR-155090 | 0.0 | 0.0 | 0.0 | 0.0 | 0.0 | 0.0 |
| 21UR-15510  | 1.0 | 1.0 | 1.0 | 4.0 | 2.0 | 0.0 |
| 21UR-155100 | 0.0 | 0.0 | 0.0 | 0.0 | 0.0 | 0.0 |
| 21UR-155110 | 0.0 | 0.1 | 0.0 | 0.0 | 0.0 | 0.0 |
| 21UR-155120 | 3.0 | 1.0 | 2.0 | 0.0 | 0.0 | 0.0 |
| 21UR-155130 | 0.0 | 0.0 | 0.0 | 0.0 | 0.0 | 0.0 |
| 21UR-155140 | 0.0 | 0.0 | 0.0 | 0.0 | 0.0 | 0.0 |
| 21UR-155150 | 0.0 | 0.0 | 0.0 | 0.0 | 0.0 | 0.0 |
| 21UR-155160 | 0.0 | 0.0 | 0.0 | 0.0 | 0.0 | 0.0 |
| 21UR-155170 | 0.0 | 0.0 | 0.0 | 0.0 | 0.0 | 0.0 |
| 21UR-155180 | 1.0 | 0.0 | 0.0 | 0.0 | 0.0 | 0.0 |
| 21UR-155190 | 0.0 | 0.0 | 0.0 | 0.0 | 0.0 | 0.0 |
| 21UR-15520  | 0.0 | 0.0 | 0.0 | 0.0 | 0.0 | 0.0 |
| 21UR-155200 | 0.0 | 0.0 | 0.0 | 0.0 | 0.0 | 0.0 |
| 21UR-155210 | 0.0 | 0.0 | 0.0 | 0.0 | 0.0 | 0.0 |
| 21UR-155220 | 1.0 | 0.0 | 0.0 | 0.0 | 1.0 | 0.0 |
| 21UR-155230 | 0.0 | 0.0 | 1.0 | 0.0 | 0.0 | 0.0 |
| 21UR-155240 | 0.0 | 0.0 | 0.0 | 0.0 | 0.0 | 0.0 |
| 21UR-155250 | 0.0 | 0.0 | 0.0 | 0.0 | 0.0 | 0.0 |
| 21UR-155260 | 0.0 | 0.0 | 0.0 | 0.0 | 0.0 | 0.0 |
| 21UR-155270 | 0.0 | 0.0 | 0.0 | 0.0 | 0.0 | 0.0 |
| 21UR-155280 | 0.0 | 0.0 | 0.0 | 0.0 | 0.0 | 0.0 |
| 21UR-155290 | 0.0 | 0.0 | 0.0 | 0.0 | 0.0 | 0.0 |
| 21UR-15530  | 0.0 | 0.0 | 0.0 | 0.0 | 0.0 | 0.0 |
| 21UR-155300 | 0.0 | 0.0 | 0.0 | 0.0 | 0.0 | 0.0 |
| 21UR-155310 | 0.0 | 0.0 | 0.0 | 0.0 | 0.0 | 0.0 |
| 21UR-155320 | 0.0 | 0.1 | 0.0 | 0.0 | 0.0 | 0.0 |
| 21UR-155330 | 0.0 | 0.0 | 0.0 | 0.0 | 0.0 | 0.0 |
| 21UR-155340 | 0.0 | 0.0 | 0.0 | 0.0 | 0.0 | 0.0 |
| 21UR-155350 | 0.0 | 0.0 | 0.0 | 0.0 | 0.0 | 0.0 |
| 21UR-155360 | 0.0 | 0.0 | 0.0 | 0.0 | 0.0 | 0.0 |
| 21UR-155370 | 0.0 | 0.0 | 0.0 | 0.0 | 0.0 | 0.0 |
| 21UR-155380 | 0.0 | 0.0 | 0.0 | 0.0 | 0.0 | 0.0 |
| 21UR-155390 | 0.0 | 0.0 | 0.0 | 0.0 | 0.0 | 0.0 |
| 21UR-15540  | 0.0 | 0.0 | 0.0 | 0.0 | 1.0 | 0.0 |
| 21UR-155400 | 0.0 | 0.0 | 0.0 | 0.0 | 0.0 | 0.0 |
| 21UR-155410 | 0.0 | 0.0 | 0.0 | 0.0 | 0.0 | 0.0 |
| 21UR-155420 | 0.0 | 0.0 | 0.0 | 0.0 | 0.0 | 0.0 |
| 21UR-155430 | 0.0 | 0.0 | 0.0 | 0.0 | 0.0 | 0.0 |
| 21UR-155440 | 0.0 | 0.0 | 0.0 | 0.0 | 0.0 | 0.0 |
| 21UR-155450 | 0.0 | 0.0 | 0.0 | 0.0 | 0.0 | 0.0 |
| 21UR-155460 | 0.0 | 0.0 | 0.0 | 0.0 | 0.0 | 0.0 |
| 21UR-155470 | 1.0 | 3.0 | 0.0 | 1.0 | 0.0 | 0.0 |
| 21UR-155480 | 0.0 | 0.0 | 0.0 | 0.0 | 0.0 | 0.0 |
| 21UR-155490 | 1.0 | 0.0 | 0.0 | 0.0 | 0.0 | 0.0 |
| 21UR-15550  | 0.0 | 4.0 | 0.0 | 1.0 | 0.0 | 3.0 |
| 21UR-155500 | 0.0 | 1.0 | 0.0 | 0.0 | 0.0 | 1.0 |
| 21UR-155510 | 0.0 | 0.0 | 0.0 | 0.0 | 0.0 | 0.0 |
| 21UR-155520 | 0.0 | 0.0 | 0.0 | 0.0 | 0.0 | 0.0 |
| 21UR-155530 | 0.0 | 0.0 | 0.0 | 0.0 | 0.0 | 0.0 |
| 21UR-155540 | 3.0 | 0.0 | 0.0 | 0.0 | 0.0 | 0.0 |

|             |       |       |       |       |      |      |
|-------------|-------|-------|-------|-------|------|------|
| 21UR-155550 | 0.0   | 0.0   | 0.0   | 0.0   | 0.0  | 1.0  |
| 21UR-155560 | 0.0   | 0.0   | 0.0   | 0.0   | 0.1  | 0.0  |
| 21UR-155570 | 0.0   | 0.0   | 0.0   | 0.0   | 0.0  | 0.0  |
| 21UR-155580 | 0.0   | 0.0   | 0.0   | 0.0   | 0.0  | 0.0  |
| 21UR-155590 | 0.0   | 0.0   | 0.0   | 0.0   | 0.0  | 0.0  |
| 21UR-15560  | 281.0 | 42.0  | 214.0 | 88.0  | 85.0 | 7.0  |
| 21UR-155600 | 0.0   | 0.0   | 0.0   | 0.0   | 0.0  | 0.0  |
| 21UR-155610 | 0.0   | 0.0   | 0.0   | 0.0   | 0.0  | 0.0  |
| 21UR-155620 | 0.0   | 0.0   | 0.0   | 0.0   | 0.0  | 0.0  |
| 21UR-155630 | 0.0   | 0.0   | 0.0   | 0.0   | 0.0  | 0.0  |
| 21UR-155640 | 0.0   | 1.0   | 0.0   | 0.0   | 0.0  | 0.0  |
| 21UR-155650 | 0.0   | 1.0   | 1.0   | 0.0   | 0.0  | 3.0  |
| 21UR-155660 | 0.0   | 0.0   | 0.0   | 0.0   | 0.0  | 0.0  |
| 21UR-155670 | 0.0   | 0.0   | 0.0   | 0.0   | 0.0  | 0.0  |
| 21UR-155680 | 2.0   | 2.5   | 0.0   | 0.0   | 1.0  | 2.0  |
| 21UR-155690 | 1.0   | 1.0   | 0.0   | 0.0   | 0.0  | 0.0  |
| 21UR-15570  | 0.0   | 1.0   | 1.0   | 0.0   | 0.0  | 0.0  |
| 21UR-155700 | 0.0   | 0.0   | 0.0   | 0.0   | 0.0  | 0.0  |
| 21UR-155710 | 7.0   | 12.3  | 14.0  | 3.0   | 14.0 | 2.0  |
| 21UR-155720 | 0.0   | 0.0   | 0.0   | 0.0   | 0.0  | 0.0  |
| 21UR-155730 | 0.0   | 0.0   | 0.0   | 0.0   | 0.0  | 0.0  |
| 21UR-155740 | 0.0   | 0.0   | 0.0   | 0.0   | 0.0  | 0.0  |
| 21UR-155750 | 0.0   | 0.0   | 0.0   | 0.0   | 0.0  | 0.0  |
| 21UR-155760 | 0.0   | 0.0   | 0.0   | 0.0   | 0.0  | 0.0  |
| 21UR-155770 | 52.0  | 50.6  | 57.0  | 45.0  | 32.0 | 8.0  |
| 21UR-155780 | 0.0   | 0.0   | 0.0   | 0.0   | 0.0  | 0.0  |
| 21UR-155790 | 0.0   | 0.0   | 0.0   | 0.0   | 0.0  | 0.0  |
| 21UR-15580  | 0.0   | 0.0   | 0.0   | 0.0   | 0.0  | 0.0  |
| 21UR-155800 | 0.0   | 0.0   | 0.0   | 1.0   | 0.0  | 0.0  |
| 21UR-155810 | 384.3 | 193.0 | 314.0 | 122.0 | 83.0 | 25.0 |
| 21UR-155820 | 0.0   | 0.0   | 0.0   | 0.0   | 2.7  | 0.0  |
| 21UR-155830 | 0.0   | 0.0   | 0.0   | 0.0   | 0.0  | 0.0  |
| 21UR-155840 | 4.0   | 3.0   | 17.0  | 4.0   | 1.0  | 0.0  |
| 21UR-155850 | 0.0   | 0.0   | 0.0   | 0.0   | 0.0  | 0.0  |
| 21UR-155860 | 0.0   | 0.0   | 1.0   | 0.0   | 0.0  | 0.0  |
| 21UR-155870 | 1.0   | 1.0   | 0.0   | 0.0   | 0.0  | 0.0  |
| 21UR-155880 | 4.0   | 0.0   | 5.0   | 0.0   | 0.0  | 0.0  |
| 21UR-155890 | 0.0   | 0.0   | 0.0   | 0.0   | 0.0  | 0.0  |
| 21UR-15590  | 42.0  | 8.0   | 28.0  | 14.0  | 14.0 | 1.0  |
| 21UR-155900 | 0.0   | 0.0   | 0.0   | 0.0   | 0.0  | 0.0  |
| 21UR-155910 | 0.0   | 0.0   | 0.0   | 0.0   | 0.0  | 0.0  |
| 21UR-155920 | 0.0   | 0.0   | 0.0   | 0.0   | 0.0  | 0.2  |
| 21UR-155930 | 0.0   | 0.0   | 0.0   | 0.0   | 0.0  | 0.0  |
| 21UR-155940 | 0.0   | 0.0   | 0.0   | 0.0   | 0.0  | 0.0  |
| 21UR-155950 | 0.0   | 0.0   | 0.0   | 0.0   | 0.0  | 0.0  |
| 21UR-155960 | 0.0   | 0.0   | 0.0   | 0.0   | 0.0  | 0.0  |
| 21UR-155970 | 0.0   | 0.0   | 0.0   | 0.0   | 0.0  | 0.0  |
| 21UR-155980 | 0.0   | 0.0   | 0.0   | 0.0   | 0.0  | 0.0  |
| 21UR-155990 | 0.0   | 0.0   | 0.0   | 0.0   | 0.0  | 0.0  |
| 21UR-1560   | 70.0  | 16.0  | 56.0  | 13.0  | 4.0  | 0.0  |
| 21UR-15600  | 3.0   | 2.0   | 4.0   | 0.0   | 6.0  | 1.0  |

|             |       |       |       |      |      |     |
|-------------|-------|-------|-------|------|------|-----|
| 21UR-156000 | 0.0   | 0.0   | 0.0   | 0.0  | 0.0  | 0.0 |
| 21UR-156010 | 0.0   | 0.0   | 0.0   | 0.0  | 0.0  | 0.0 |
| 21UR-156020 | 5.0   | 4.0   | 5.0   | 2.0  | 7.0  | 1.0 |
| 21UR-156030 | 0.0   | 0.0   | 0.0   | 0.0  | 0.0  | 0.0 |
| 21UR-156040 | 0.0   | 8.0   | 4.0   | 0.0  | 5.0  | 1.0 |
| 21UR-156050 | 0.0   | 0.0   | 0.0   | 0.0  | 0.0  | 0.0 |
| 21UR-156060 | 0.0   | 0.0   | 0.0   | 0.0  | 0.0  | 0.0 |
| 21UR-156070 | 2.0   | 4.0   | 4.0   | 0.0  | 13.0 | 0.0 |
| 21UR-156080 | 0.0   | 0.3   | 0.0   | 0.0  | 0.0  | 0.0 |
| 21UR-156090 | 25.0  | 4.0   | 35.0  | 9.0  | 3.0  | 0.0 |
| 21UR-15610  | 4.0   | 2.0   | 1.0   | 0.0  | 2.0  | 0.0 |
| 21UR-156100 | 0.0   | 0.0   | 0.0   | 0.0  | 0.0  | 0.0 |
| 21UR-156110 | 4.0   | 0.0   | 0.0   | 1.0  | 0.0  | 0.0 |
| 21UR-156120 | 11.0  | 0.0   | 6.0   | 1.0  | 2.0  | 0.0 |
| 21UR-156130 | 0.0   | 0.0   | 0.0   | 0.0  | 0.0  | 0.0 |
| 21UR-156140 | 0.0   | 0.0   | 0.0   | 0.0  | 0.0  | 0.0 |
| 21UR-156150 | 0.0   | 0.0   | 0.0   | 0.0  | 0.0  | 0.0 |
| 21UR-156160 | 9.0   | 115.0 | 1.0   | 3.0  | 79.5 | 7.0 |
| 21UR-156170 | 0.0   | 0.0   | 0.0   | 0.0  | 0.0  | 0.0 |
| 21UR-156180 | 0.0   | 0.0   | 0.0   | 0.0  | 0.0  | 0.0 |
| 21UR-156190 | 0.0   | 0.0   | 0.0   | 0.0  | 0.0  | 0.0 |
| 21UR-15620  | 0.0   | 1.0   | 4.0   | 0.0  | 14.0 | 0.0 |
| 21UR-156200 | 0.0   | 0.0   | 0.0   | 0.0  | 0.0  | 0.0 |
| 21UR-156210 | 23.0  | 1.0   | 19.0  | 6.0  | 1.0  | 0.0 |
| 21UR-156220 | 0.0   | 0.0   | 0.0   | 0.0  | 0.0  | 0.0 |
| 21UR-156230 | 1.0   | 1.0   | 2.0   | 0.0  | 2.0  | 0.0 |
| 21UR-156240 | 0.0   | 0.0   | 0.0   | 0.0  | 0.0  | 0.0 |
| 21UR-156250 | 0.0   | 0.0   | 0.0   | 0.0  | 0.0  | 0.0 |
| 21UR-156260 | 159.0 | 44.0  | 156.0 | 99.0 | 82.0 | 4.0 |
| 21UR-156270 | 0.0   | 0.0   | 0.0   | 0.0  | 0.0  | 0.0 |
| 21UR-156280 | 0.0   | 0.0   | 0.0   | 0.0  | 0.0  | 0.0 |
| 21UR-156290 | 1.0   | 0.0   | 0.0   | 0.0  | 0.0  | 0.0 |
| 21UR-15630  | 0.0   | 3.0   | 0.0   | 0.0  | 0.0  | 1.0 |
| 21UR-156300 | 0.0   | 0.0   | 0.0   | 0.0  | 0.0  | 0.0 |
| 21UR-156310 | 0.0   | 0.0   | 0.0   | 0.0  | 0.0  | 0.0 |
| 21UR-156320 | 1.0   | 0.0   | 0.0   | 0.0  | 0.0  | 0.0 |
| 21UR-156330 | 10.0  | 4.0   | 7.0   | 6.0  | 9.0  | 1.0 |
| 21UR-156340 | 0.0   | 0.0   | 0.0   | 0.0  | 0.0  | 0.0 |
| 21UR-156350 | 0.0   | 0.0   | 0.0   | 0.0  | 1.0  | 0.0 |
| 21UR-156360 | 0.0   | 0.0   | 0.0   | 0.0  | 0.0  | 0.0 |
| 21UR-156370 | 9.0   | 1.0   | 3.0   | 5.0  | 2.0  | 1.0 |
| 21UR-156380 | 0.0   | 0.0   | 0.0   | 0.0  | 0.0  | 0.0 |
| 21UR-156390 | 0.0   | 0.0   | 0.0   | 0.0  | 0.0  | 0.0 |
| 21UR-15640  | 0.0   | 0.0   | 0.0   | 0.0  | 0.0  | 0.0 |
| 21UR-156400 | 0.0   | 0.0   | 0.0   | 0.0  | 0.0  | 0.0 |
| 21UR-156410 | 0.0   | 0.0   | 0.0   | 0.0  | 0.0  | 0.0 |
| 21UR-156420 | 0.0   | 0.0   | 0.0   | 0.0  | 0.0  | 0.0 |
| 21UR-156430 | 0.0   | 0.0   | 0.0   | 0.0  | 0.0  | 0.0 |
| 21UR-156440 | 0.0   | 0.0   | 0.0   | 0.0  | 0.0  | 0.0 |
| 21UR-156450 | 13.0  | 4.0   | 6.0   | 4.0  | 2.0  | 1.0 |
| 21UR-156460 | 59.0  | 8.0   | 59.0  | 19.0 | 26.0 | 1.0 |

|             |        |      |       |       |       |      |
|-------------|--------|------|-------|-------|-------|------|
| 21UR-156470 | 0.0    | 0.0  | 1.0   | 0.0   | 0.0   | 0.0  |
| 21UR-156480 | 0.0    | 0.0  | 0.0   | 0.0   | 0.0   | 0.0  |
| 21UR-156490 | 0.0    | 0.0  | 0.0   | 0.0   | 1.0   | 0.0  |
| 21UR-15650  | 1.0    | 0.0  | 4.0   | 0.0   | 0.0   | 1.0  |
| 21UR-156500 | 680.7  | 69.0 | 522.0 | 208.0 | 76.0  | 7.0  |
| 21UR-156510 | 15.0   | 1.0  | 14.0  | 0.0   | 5.0   | 0.0  |
| 21UR-156520 | 5.0    | 1.0  | 2.0   | 2.0   | 3.0   | 1.0  |
| 21UR-156530 | 0.0    | 0.0  | 0.0   | 0.0   | 0.0   | 0.0  |
| 21UR-156540 | 0.0    | 0.0  | 0.0   | 0.0   | 0.0   | 0.0  |
| 21UR-156550 | 0.0    | 0.0  | 0.0   | 0.0   | 0.0   | 0.0  |
| 21UR-156560 | 1006.0 | 76.4 | 742.0 | 426.5 | 164.5 | 10.0 |
| 21UR-156570 | 24.0   | 24.0 | 22.0  | 22.0  | 21.0  | 6.0  |
| 21UR-156580 | 15.0   | 2.0  | 6.0   | 2.0   | 0.0   | 0.0  |
| 21UR-156590 | 0.0    | 0.0  | 0.0   | 0.0   | 0.0   | 0.0  |
| 21UR-15660  | 13.0   | 6.0  | 11.0  | 1.0   | 2.0   | 1.0  |
| 21UR-156600 | 44.0   | 3.0  | 17.0  | 7.0   | 7.0   | 8.0  |
| 21UR-156610 | 1.0    | 0.0  | 0.0   | 0.0   | 0.0   | 0.0  |
| 21UR-156620 | 0.0    | 2.0  | 1.0   | 0.0   | 1.0   | 0.0  |
| 21UR-156630 | 0.0    | 0.0  | 0.0   | 0.0   | 0.0   | 0.0  |
| 21UR-156640 | 2.0    | 32.0 | 1.0   | 3.0   | 96.5  | 3.0  |
| 21UR-156650 | 0.0    | 0.0  | 0.0   | 0.0   | 0.0   | 0.0  |
| 21UR-156660 | 1.0    | 3.0  | 1.0   | 0.0   | 0.0   | 1.0  |
| 21UR-156670 | 8.0    | 12.0 | 1.0   | 0.0   | 12.0  | 1.0  |
| 21UR-156680 | 0.0    | 0.0  | 0.0   | 0.0   | 0.0   | 0.0  |
| 21UR-156690 | 1.0    | 1.0  | 1.0   | 0.0   | 0.0   | 0.0  |
| 21UR-15670  | 4.0    | 6.0  | 6.0   | 0.0   | 1.0   | 0.0  |
| 21UR-156700 | 0.0    | 0.0  | 0.0   | 0.0   | 0.0   | 0.0  |
| 21UR-156710 | 0.0    | 0.0  | 0.0   | 0.0   | 1.0   | 0.0  |
| 21UR-156720 | 0.0    | 0.0  | 0.0   | 0.0   | 0.0   | 0.0  |
| 21UR-156730 | 0.0    | 0.0  | 0.0   | 0.0   | 0.0   | 0.0  |
| 21UR-156740 | 53.0   | 7.0  | 46.0  | 24.0  | 16.0  | 0.0  |
| 21UR-156750 | 61.0   | 4.0  | 39.0  | 14.0  | 6.0   | 0.0  |
| 21UR-156760 | 344.0  | 40.0 | 262.0 | 50.0  | 18.0  | 7.0  |
| 21UR-156770 | 1.0    | 1.0  | 1.0   | 1.0   | 4.0   | 0.0  |
| 21UR-156780 | 28.0   | 1.0  | 17.0  | 6.0   | 1.0   | 0.0  |
| 21UR-156790 | 1.0    | 2.0  | 0.0   | 3.0   | 8.0   | 1.0  |
| 21UR-15680  | 0.0    | 0.0  | 0.0   | 0.0   | 0.0   | 0.0  |
| 21UR-156800 | 0.0    | 0.0  | 0.0   | 0.0   | 0.0   | 0.0  |
| 21UR-156810 | 7.0    | 5.0  | 16.0  | 5.0   | 11.0  | 2.0  |
| 21UR-156820 | 29.0   | 10.0 | 48.0  | 15.0  | 23.0  | 4.0  |
| 21UR-156830 | 9.0    | 2.0  | 12.0  | 1.0   | 0.0   | 1.0  |
| 21UR-156840 | 1.0    | 1.0  | 0.0   | 3.0   | 0.0   | 0.0  |
| 21UR-156850 | 21.0   | 23.0 | 27.0  | 4.0   | 19.0  | 17.0 |
| 21UR-156860 | 8.0    | 3.0  | 3.0   | 4.0   | 0.0   | 0.0  |
| 21UR-156870 | 0.0    | 0.0  | 0.0   | 0.0   | 0.0   | 0.0  |
| 21UR-156880 | 4.0    | 25.0 | 6.0   | 1.0   | 45.0  | 1.0  |
| 21UR-156890 | 2.0    | 0.0  | 3.0   | 3.0   | 0.0   | 0.0  |
| 21UR-15690  | 18.0   | 9.0  | 21.0  | 13.0  | 4.0   | 0.0  |
| 21UR-156900 | 0.0    | 0.0  | 0.0   | 0.0   | 0.0   | 0.0  |
| 21UR-156910 | 1.0    | 0.0  | 0.0   | 1.0   | 0.0   | 0.0  |
| 21UR-156920 | 0.0    | 0.0  | 1.0   | 0.0   | 0.0   | 0.0  |

|             |       |       |       |       |       |      |
|-------------|-------|-------|-------|-------|-------|------|
| 21UR-156930 | 0.0   | 0.0   | 0.0   | 0.0   | 0.0   | 0.0  |
| 21UR-156940 | 0.0   | 0.0   | 0.0   | 0.0   | 0.0   | 0.0  |
| 21UR-156950 | 20.0  | 41.0  | 18.0  | 13.0  | 48.0  | 0.0  |
| 21UR-156960 | 0.0   | 0.0   | 0.0   | 0.0   | 0.0   | 0.0  |
| 21UR-156970 | 0.0   | 0.0   | 0.0   | 0.0   | 0.0   | 0.0  |
| 21UR-156980 | 0.0   | 0.0   | 0.0   | 0.0   | 0.0   | 0.0  |
| 21UR-156990 | 0.0   | 0.1   | 0.0   | 0.0   | 0.0   | 0.0  |
| 21UR-1570   | 4.0   | 0.0   | 10.0  | 0.0   | 5.0   | 1.0  |
| 21UR-15700  | 0.0   | 26.0  | 0.0   | 0.0   | 2.0   | 3.0  |
| 21UR-157000 | 0.0   | 0.0   | 0.0   | 0.0   | 0.0   | 0.0  |
| 21UR-157010 | 0.0   | 0.0   | 0.0   | 0.0   | 0.0   | 0.0  |
| 21UR-157020 | 0.0   | 0.0   | 0.0   | 0.0   | 0.0   | 0.0  |
| 21UR-15710  | 0.0   | 1.0   | 0.0   | 0.0   | 0.0   | 0.0  |
| 21UR-15720  | 1.0   | 1.0   | 0.0   | 0.0   | 1.0   | 0.0  |
| 21UR-15730  | 5.0   | 3.0   | 5.0   | 1.0   | 0.0   | 0.0  |
| 21UR-15740  | 0.0   | 0.0   | 0.0   | 0.0   | 0.0   | 0.0  |
| 21UR-15750  | 226.0 | 61.0  | 213.0 | 83.0  | 108.0 | 12.0 |
| 21UR-15760  | 0.0   | 0.0   | 0.0   | 0.0   | 0.0   | 0.0  |
| 21UR-15770  | 0.0   | 8.0   | 0.0   | 0.0   | 4.0   | 1.0  |
| 21UR-15780  | 6.0   | 0.0   | 1.0   | 1.0   | 1.0   | 0.0  |
| 21UR-15790  | 0.0   | 6.0   | 0.0   | 0.0   | 4.0   | 0.0  |
| 21UR-1580   | 0.0   | 0.0   | 0.0   | 0.0   | 0.0   | 0.0  |
| 21UR-15800  | 0.0   | 0.0   | 0.0   | 0.0   | 0.0   | 0.0  |
| 21UR-15810  | 299.0 | 23.0  | 308.0 | 84.0  | 65.0  | 3.0  |
| 21UR-15820  | 15.0  | 0.0   | 14.0  | 6.0   | 1.0   | 1.0  |
| 21UR-15830  | 0.0   | 0.0   | 1.0   | 0.0   | 0.0   | 0.0  |
| 21UR-15840  | 0.0   | 0.0   | 1.0   | 0.0   | 0.0   | 0.0  |
| 21UR-15850  | 451.0 | 4.0   | 434.5 | 101.0 | 8.0   | 4.0  |
| 21UR-15860  | 0.0   | 1.0   | 0.0   | 0.0   | 0.0   | 0.0  |
| 21UR-15870  | 1.0   | 0.0   | 4.0   | 0.0   | 4.0   | 0.0  |
| 21UR-15880  | 14.0  | 5.0   | 21.0  | 2.0   | 7.0   | 4.0  |
| 21UR-15890  | 24.0  | 13.0  | 30.0  | 10.0  | 9.0   | 0.0  |
| 21UR-15900  | 0.0   | 1.0   | 0.0   | 0.0   | 0.0   | 0.0  |
| 21UR-15910  | 37.0  | 37.0  | 45.0  | 4.0   | 56.0  | 1.0  |
| 21UR-15920  | 0.0   | 0.0   | 0.0   | 0.0   | 0.0   | 0.0  |
| 21UR-15930  | 1.0   | 1.0   | 0.0   | 0.0   | 0.0   | 0.0  |
| 21UR-15950  | 7.0   | 1.0   | 10.0  | 0.0   | 1.0   | 0.0  |
| 21UR-15960  | 0.0   | 0.0   | 0.0   | 0.0   | 2.0   | 0.0  |
| 21UR-15970  | 0.0   | 0.0   | 0.0   | 1.0   | 0.0   | 0.0  |
| 21UR-15980  | 197.0 | 7.0   | 158.0 | 52.0  | 12.0  | 0.0  |
| 21UR-160    | 648.0 | 119.8 | 624.5 | 455.0 | 195.0 | 17.0 |
| 21UR-1600   | 12.0  | 1.0   | 4.0   | 0.0   | 0.0   | 0.0  |
| 21UR-16000  | 0.0   | 0.0   | 1.0   | 0.0   | 0.0   | 0.0  |
| 21UR-16010  | 1.0   | 1.0   | 2.0   | 0.0   | 1.0   | 0.0  |
| 21UR-16020  | 1.0   | 1.0   | 1.0   | 0.0   | 0.0   | 0.0  |
| 21UR-16030  | 0.0   | 0.0   | 0.0   | 0.0   | 0.0   | 0.0  |
| 21UR-16040  | 10.0  | 13.0  | 2.0   | 5.0   | 17.0  | 4.0  |
| 21UR-16050  | 8.0   | 0.0   | 8.0   | 1.0   | 6.0   | 0.0  |
| 21UR-16060  | 2.0   | 0.0   | 0.0   | 0.0   | 4.0   | 1.0  |
| 21UR-16070  | 1.0   | 0.0   | 0.0   | 0.0   | 4.0   | 1.0  |
| 21UR-16080  | 0.0   | 1.0   | 0.0   | 0.0   | 4.0   | 0.0  |

|            |       |       |       |       |       |      |
|------------|-------|-------|-------|-------|-------|------|
| 21UR-16090 | 0.0   | 1.0   | 0.0   | 0.0   | 0.0   | 0.0  |
| 21UR-1610  | 6.0   | 26.8  | 7.0   | 5.0   | 19.0  | 9.0  |
| 21UR-16100 | 0.0   | 1.0   | 0.0   | 0.0   | 0.0   | 1.0  |
| 21UR-16110 | 103.2 | 33.3  | 16.0  | 55.0  | 28.0  | 6.0  |
| 21UR-16120 | 15.0  | 18.0  | 7.0   | 6.0   | 17.0  | 3.0  |
| 21UR-16140 | 4.0   | 0.0   | 0.0   | 0.0   | 0.0   | 0.0  |
| 21UR-16150 | 12.0  | 6.0   | 28.0  | 11.0  | 4.0   | 0.0  |
| 21UR-16160 | 0.0   | 1.0   | 0.0   | 1.0   | 3.0   | 0.0  |
| 21UR-16170 | 1.0   | 0.0   | 0.0   | 0.0   | 1.0   | 0.0  |
| 21UR-16180 | 402.0 | 72.0  | 332.0 | 164.0 | 26.5  | 6.0  |
| 21UR-16190 | 0.0   | 3.0   | 1.0   | 0.0   | 4.0   | 0.0  |
| 21UR-1620  | 0.0   | 0.0   | 1.0   | 0.0   | 0.0   | 0.0  |
| 21UR-16200 | 0.0   | 0.0   | 0.0   | 0.0   | 0.0   | 0.0  |
| 21UR-16210 | 0.0   | 0.0   | 1.0   | 0.0   | 0.0   | 0.0  |
| 21UR-16220 | 0.0   | 0.0   | 0.0   | 0.0   | 0.0   | 0.0  |
| 21UR-16230 | 479.0 | 57.0  | 420.0 | 373.0 | 359.0 | 11.0 |
| 21UR-16240 | 86.0  | 14.0  | 78.0  | 23.0  | 9.0   | 0.0  |
| 21UR-16250 | 0.0   | 0.0   | 0.0   | 0.0   | 0.0   | 0.1  |
| 21UR-16260 | 8.0   | 16.0  | 1.0   | 1.0   | 20.0  | 1.0  |
| 21UR-16270 | 0.0   | 0.0   | 0.0   | 0.0   | 0.0   | 0.0  |
| 21UR-16280 | 0.0   | 0.0   | 0.0   | 0.0   | 0.0   | 0.0  |
| 21UR-16290 | 18.0  | 10.0  | 20.0  | 9.0   | 21.0  | 0.0  |
| 21UR-1630  | 251.9 | 133.7 | 273.0 | 153.0 | 241.5 | 58.0 |
| 21UR-16300 | 8.0   | 9.0   | 8.0   | 4.0   | 5.5   | 1.0  |
| 21UR-16310 | 0.0   | 0.0   | 0.0   | 0.0   | 0.0   | 0.0  |
| 21UR-16320 | 31.5  | 21.0  | 24.0  | 7.0   | 8.0   | 0.0  |
| 21UR-16330 | 0.0   | 0.0   | 0.0   | 0.0   | 0.0   | 0.0  |
| 21UR-16340 | 30.0  | 2.1   | 34.0  | 1.0   | 3.0   | 1.1  |
| 21UR-16350 | 0.0   | 0.0   | 10.0  | 1.0   | 6.0   | 0.0  |
| 21UR-16360 | 0.0   | 1.0   | 0.0   | 0.0   | 0.0   | 0.0  |
| 21UR-16370 | 24.5  | 9.0   | 30.0  | 9.0   | 15.0  | 1.0  |
| 21UR-16380 | 0.0   | 0.0   | 6.0   | 0.0   | 0.0   | 0.0  |
| 21UR-16390 | 14.0  | 1.0   | 18.0  | 6.0   | 1.0   | 0.0  |
| 21UR-1640  | 6.0   | 0.0   | 9.0   | 0.0   | 0.0   | 0.0  |
| 21UR-16400 | 1.0   | 0.0   | 2.0   | 0.0   | 1.0   | 0.0  |
| 21UR-16410 | 6.0   | 0.0   | 4.0   | 2.0   | 5.0   | 0.0  |
| 21UR-16420 | 23.0  | 6.0   | 23.0  | 17.0  | 19.0  | 0.0  |
| 21UR-16430 | 6.0   | 3.0   | 7.5   | 0.0   | 1.0   | 0.0  |
| 21UR-16440 | 4.0   | 0.0   | 4.0   | 0.0   | 0.0   | 0.0  |
| 21UR-16450 | 3.0   | 2.0   | 4.0   | 6.0   | 4.0   | 0.0  |
| 21UR-16460 | 0.0   | 0.0   | 0.0   | 0.0   | 0.0   | 0.0  |
| 21UR-16470 | 67.0  | 13.0  | 34.0  | 19.0  | 4.0   | 4.0  |
| 21UR-16480 | 0.0   | 0.0   | 0.0   | 0.0   | 0.0   | 1.0  |
| 21UR-16490 | 14.0  | 1.0   | 13.0  | 1.0   | 2.0   | 0.0  |
| 21UR-1650  | 0.0   | 0.0   | 0.0   | 0.0   | 0.0   | 0.0  |
| 21UR-16500 | 0.0   | 2.0   | 0.0   | 0.0   | 0.0   | 0.0  |
| 21UR-16510 | 2.0   | 13.0  | 2.0   | 0.0   | 2.0   | 0.0  |
| 21UR-16530 | 0.0   | 4.0   | 1.0   | 1.0   | 0.0   | 0.0  |
| 21UR-16540 | 1.0   | 0.0   | 0.0   | 0.0   | 0.0   | 0.0  |
| 21UR-16550 | 0.0   | 0.0   | 0.0   | 0.0   | 0.0   | 0.0  |
| 21UR-16560 | 0.0   | 2.0   | 0.0   | 1.0   | 0.0   | 0.0  |



|            |       |       |       |       |       |      |
|------------|-------|-------|-------|-------|-------|------|
| 21UR-16570 | 0.0   | 0.0   | 0.0   | 0.0   | 0.0   | 0.0  |
| 21UR-16580 | 4.0   | 2.0   | 2.0   | 1.0   | 1.0   | 0.0  |
| 21UR-16590 | 130.0 | 40.1  | 129.0 | 60.0  | 51.0  | 3.0  |
| 21UR-1660  | 9.0   | 0.0   | 12.0  | 0.0   | 1.1   | 0.0  |
| 21UR-16600 | 18.0  | 1.0   | 24.0  | 1.0   | 1.0   | 0.0  |
| 21UR-16610 | 0.0   | 0.0   | 0.0   | 0.0   | 0.0   | 0.0  |
| 21UR-16620 | 4.0   | 1.0   | 4.0   | 1.0   | 4.0   | 1.0  |
| 21UR-16630 | 1.0   | 0.0   | 7.0   | 4.0   | 6.0   | 0.0  |
| 21UR-16640 | 0.0   | 0.0   | 0.0   | 0.0   | 0.0   | 0.0  |
| 21UR-16650 | 4.0   | 0.0   | 1.0   | 1.0   | 0.0   | 0.0  |
| 21UR-16660 | 0.0   | 0.0   | 0.0   | 0.0   | 1.0   | 1.0  |
| 21UR-16670 | 7.7   | 0.0   | 11.0  | 1.0   | 2.0   | 0.0  |
| 21UR-16680 | 4.0   | 6.0   | 12.0  | 4.0   | 23.0  | 1.0  |
| 21UR-16690 | 0.0   | 1.0   | 0.0   | 0.0   | 4.0   | 0.0  |
| 21UR-1670  | 6.0   | 0.0   | 8.0   | 6.0   | 10.0  | 0.0  |
| 21UR-16700 | 14.0  | 16.0  | 28.0  | 1.0   | 11.0  | 1.0  |
| 21UR-16710 | 6.0   | 17.0  | 0.0   | 0.0   | 18.0  | 4.0  |
| 21UR-16720 | 0.0   | 0.0   | 0.0   | 0.0   | 0.0   | 0.0  |
| 21UR-16730 | 0.0   | 1.0   | 5.0   | 1.0   | 0.0   | 1.0  |
| 21UR-16740 | 3.0   | 0.0   | 4.0   | 0.0   | 6.0   | 0.0  |
| 21UR-16750 | 0.0   | 12.0  | 1.0   | 0.0   | 5.0   | 0.0  |
| 21UR-16760 | 482.3 | 183.0 | 348.0 | 233.0 | 297.0 | 30.0 |
| 21UR-16770 | 1.0   | 0.0   | 1.0   | 0.0   | 1.0   | 0.0  |
| 21UR-16780 | 158.0 | 6.0   | 73.0  | 26.0  | 8.0   | 1.0  |
| 21UR-16790 | 0.0   | 0.0   | 0.0   | 0.0   | 0.0   | 0.0  |
| 21UR-1680  | 1.0   | 0.0   | 0.0   | 0.0   | 0.0   | 0.0  |
| 21UR-16800 | 0.0   | 1.0   | 1.0   | 0.0   | 3.0   | 0.0  |
| 21UR-16810 | 3.0   | 2.0   | 9.0   | 0.5   | 0.0   | 0.0  |
| 21UR-16820 | 0.0   | 0.0   | 0.0   | 0.0   | 0.0   | 0.0  |
| 21UR-16830 | 0.0   | 1.0   | 0.0   | 1.0   | 0.0   | 0.0  |
| 21UR-16840 | 126.0 | 90.7  | 91.0  | 55.0  | 53.0  | 8.0  |
| 21UR-16850 | 0.0   | 0.0   | 0.0   | 0.0   | 4.0   | 0.0  |
| 21UR-16860 | 13.0  | 8.0   | 10.0  | 6.0   | 10.0  | 2.0  |
| 21UR-16870 | 12.0  | 15.0  | 4.0   | 1.0   | 8.0   | 0.0  |
| 21UR-16880 | 1.0   | 1.0   | 0.0   | 0.0   | 5.0   | 0.0  |
| 21UR-16890 | 0.0   | 1.0   | 1.0   | 0.0   | 0.0   | 0.0  |
| 21UR-1690  | 0.0   | 7.0   | 0.0   | 0.0   | 0.0   | 0.0  |
| 21UR-16900 | 14.0  | 0.0   | 16.0  | 6.0   | 4.0   | 0.0  |
| 21UR-16910 | 64.0  | 32.0  | 66.0  | 22.0  | 7.0   | 0.0  |
| 21UR-16920 | 0.0   | 0.0   | 0.0   | 0.0   | 2.0   | 0.0  |
| 21UR-16930 | 0.0   | 0.0   | 0.0   | 0.0   | 0.0   | 0.0  |
| 21UR-16940 | 4.0   | 0.0   | 1.0   | 1.0   | 0.0   | 0.0  |
| 21UR-16950 | 0.0   | 0.0   | 0.0   | 0.0   | 0.0   | 0.0  |
| 21UR-16960 | 4.0   | 1.0   | 0.0   | 0.0   | 1.0   | 0.0  |
| 21UR-16970 | 36.0  | 15.0  | 19.0  | 4.0   | 24.0  | 6.0  |
| 21UR-16980 | 0.0   | 0.0   | 0.0   | 0.0   | 2.0   | 0.0  |
| 21UR-16990 | 1.0   | 0.0   | 1.0   | 0.0   | 0.0   | 0.0  |
| 21UR-170   | 1.0   | 0.0   | 6.0   | 4.0   | 0.0   | 0.0  |
| 21UR-1700  | 0.0   | 0.0   | 0.0   | 0.0   | 0.0   | 0.0  |
| 21UR-17000 | 1.0   | 0.0   | 4.0   | 0.0   | 0.0   | 0.0  |
| 21UR-17010 | 0.0   | 0.0   | 0.0   | 0.0   | 0.0   | 0.0  |

|            |       |       |       |       |       |      |
|------------|-------|-------|-------|-------|-------|------|
| 21UR-17020 | 8.0   | 2.0   | 10.0  | 0.0   | 1.0   | 0.0  |
| 21UR-17030 | 0.0   | 2.0   | 0.0   | 0.0   | 0.0   | 0.0  |
| 21UR-17040 | 0.0   | 0.0   | 0.0   | 0.0   | 0.0   | 0.0  |
| 21UR-17050 | 3.0   | 0.0   | 0.0   | 1.0   | 0.0   | 0.0  |
| 21UR-17060 | 22.0  | 3.0   | 32.0  | 12.0  | 15.0  | 1.0  |
| 21UR-17070 | 0.0   | 1.0   | 0.0   | 0.0   | 1.0   | 0.0  |
| 21UR-17080 | 3.0   | 0.0   | 1.0   | 6.0   | 6.0   | 0.0  |
| 21UR-17090 | 0.0   | 0.0   | 0.0   | 0.0   | 0.0   | 0.0  |
| 21UR-1710  | 122.0 | 16.0  | 120.0 | 43.0  | 52.0  | 2.0  |
| 21UR-17100 | 54.0  | 27.0  | 46.0  | 13.0  | 56.0  | 3.0  |
| 21UR-17110 | 1.0   | 3.0   | 1.0   | 0.0   | 3.0   | 0.0  |
| 21UR-17130 | 0.0   | 2.0   | 0.0   | 1.0   | 3.0   | 1.0  |
| 21UR-17140 | 16.0  | 4.5   | 6.0   | 0.0   | 1.0   | 0.0  |
| 21UR-17150 | 3.0   | 3.2   | 3.0   | 2.0   | 0.0   | 0.0  |
| 21UR-17160 | 0.0   | 0.1   | 0.0   | 0.0   | 0.0   | 0.0  |
| 21UR-17170 | 0.0   | 1.0   | 0.0   | 0.0   | 0.0   | 0.0  |
| 21UR-17180 | 8.0   | 0.0   | 3.0   | 1.0   | 1.0   | 0.0  |
| 21UR-17190 | 17.0  | 27.0  | 8.0   | 1.0   | 23.0  | 0.0  |
| 21UR-1720  | 396.0 | 243.0 | 294.0 | 164.0 | 112.0 | 10.0 |
| 21UR-17200 | 0.0   | 0.0   | 0.0   | 0.0   | 0.0   | 0.0  |
| 21UR-17210 | 0.0   | 0.0   | 0.0   | 0.0   | 0.0   | 0.0  |
| 21UR-17220 | 0.0   | 0.0   | 0.0   | 0.0   | 0.0   | 0.0  |
| 21UR-17230 | 13.0  | 4.0   | 14.0  | 7.0   | 0.0   | 1.0  |
| 21UR-17240 | 0.0   | 0.0   | 0.0   | 0.0   | 0.0   | 0.0  |
| 21UR-17250 | 0.0   | 1.0   | 0.0   | 0.0   | 4.0   | 0.0  |
| 21UR-17260 | 4.0   | 0.0   | 0.0   | 0.0   | 0.0   | 0.0  |
| 21UR-17270 | 6.0   | 0.0   | 1.0   | 1.0   | 0.0   | 0.0  |
| 21UR-17280 | 6.0   | 4.0   | 4.0   | 0.0   | 1.0   | 1.0  |
| 21UR-17290 | 0.0   | 0.1   | 0.0   | 0.0   | 0.0   | 0.0  |
| 21UR-1730  | 8.0   | 1.0   | 11.0  | 1.0   | 1.0   | 1.0  |
| 21UR-17300 | 11.0  | 3.0   | 2.0   | 5.0   | 10.0  | 0.0  |
| 21UR-17310 | 205.0 | 144.5 | 159.0 | 90.0  | 75.0  | 5.0  |
| 21UR-17320 | 0.0   | 1.0   | 0.0   | 0.0   | 0.0   | 0.0  |
| 21UR-17330 | 0.0   | 4.0   | 0.0   | 0.0   | 0.0   | 0.0  |
| 21UR-17340 | 16.0  | 7.0   | 25.0  | 1.0   | 17.0  | 2.0  |
| 21UR-17350 | 0.0   | 0.0   | 0.0   | 0.0   | 0.0   | 0.0  |
| 21UR-17360 | 0.0   | 1.0   | 6.0   | 1.0   | 10.0  | 1.0  |
| 21UR-17370 | 0.0   | 0.0   | 0.0   | 0.0   | 1.0   | 1.0  |
| 21UR-17380 | 6.0   | 0.0   | 1.0   | 0.0   | 1.0   | 0.0  |
| 21UR-17390 | 8.0   | 1.0   | 1.0   | 0.0   | 1.0   | 1.0  |
| 21UR-1740  | 2.0   | 4.0   | 6.0   | 0.0   | 4.0   | 0.0  |
| 21UR-17400 | 12.0  | 14.0  | 17.0  | 4.0   | 6.0   | 0.0  |
| 21UR-17410 | 0.0   | 0.0   | 1.0   | 0.0   | 2.0   | 0.0  |
| 21UR-17420 | 0.0   | 0.0   | 0.0   | 0.0   | 0.0   | 0.0  |
| 21UR-17430 | 0.0   | 0.0   | 0.0   | 0.0   | 0.0   | 0.0  |
| 21UR-17440 | 0.0   | 0.0   | 0.0   | 0.0   | 0.0   | 0.0  |
| 21UR-17450 | 0.0   | 9.0   | 1.0   | 0.0   | 2.0   | 0.0  |
| 21UR-17460 | 69.0  | 3.0   | 25.0  | 11.0  | 11.0  | 11.0 |
| 21UR-17470 | 36.0  | 13.0  | 31.0  | 7.0   | 6.0   | 4.0  |
| 21UR-17480 | 0.0   | 0.0   | 0.0   | 0.0   | 0.0   | 0.0  |
| 21UR-17490 | 29.7  | 1.0   | 32.0  | 4.0   | 4.0   | 1.0  |

|            |        |       |        |       |      |      |
|------------|--------|-------|--------|-------|------|------|
| 21UR-1750  | 10.0   | 1.0   | 19.0   | 10.0  | 0.0  | 0.0  |
| 21UR-17500 | 2.0    | 1.0   | 0.0    | 0.0   | 2.0  | 1.0  |
| 21UR-17510 | 1.0    | 0.0   | 1.0    | 0.0   | 0.0  | 0.0  |
| 21UR-17520 | 0.0    | 0.0   | 0.0    | 0.0   | 0.0  | 0.0  |
| 21UR-17530 | 0.0    | 0.0   | 0.0    | 0.0   | 0.0  | 0.0  |
| 21UR-17540 | 0.0    | 0.0   | 0.0    | 0.0   | 0.0  | 0.0  |
| 21UR-17560 | 0.0    | 0.0   | 0.0    | 0.0   | 0.0  | 0.0  |
| 21UR-17570 | 4.0    | 0.0   | 1.0    | 0.0   | 0.0  | 0.0  |
| 21UR-17580 | 33.0   | 25.0  | 30.0   | 6.0   | 33.0 | 5.0  |
| 21UR-17590 | 0.0    | 1.0   | 0.0    | 0.0   | 1.0  | 0.0  |
| 21UR-1760  | 0.0    | 0.0   | 0.0    | 0.0   | 0.0  | 0.0  |
| 21UR-17600 | 4.0    | 1.0   | 4.0    | 0.0   | 0.0  | 2.0  |
| 21UR-17610 | 2.0    | 1.0   | 5.0    | 7.0   | 7.0  | 0.0  |
| 21UR-17620 | 33.0   | 15.0  | 21.0   | 18.0  | 23.0 | 6.0  |
| 21UR-17630 | 0.0    | 0.0   | 1.0    | 0.0   | 0.0  | 0.0  |
| 21UR-17640 | 4.0    | 0.0   | 0.0    | 0.0   | 0.0  | 0.0  |
| 21UR-17670 | 0.0    | 0.0   | 0.0    | 0.0   | 0.0  | 0.0  |
| 21UR-17680 | 0.0    | 0.0   | 0.0    | 0.0   | 0.0  | 0.0  |
| 21UR-17690 | 0.0    | 0.0   | 1.0    | 0.0   | 0.0  | 0.0  |
| 21UR-1770  | 0.0    | 0.0   | 0.0    | 0.0   | 0.0  | 0.0  |
| 21UR-17700 | 4.0    | 81.0  | 1.0    | 8.0   | 64.0 | 8.0  |
| 21UR-17710 | 1.0    | 0.0   | 1.0    | 0.0   | 0.0  | 0.0  |
| 21UR-17720 | 0.0    | 1.0   | 2.0    | 0.0   | 4.0  | 0.0  |
| 21UR-17730 | 0.0    | 1.0   | 0.0    | 0.0   | 1.0  | 0.0  |
| 21UR-17740 | 0.0    | 0.0   | 0.0    | 0.0   | 4.0  | 0.0  |
| 21UR-17750 | 0.0    | 0.0   | 0.0    | 0.0   | 0.0  | 0.0  |
| 21UR-17760 | 3.0    | 4.0   | 7.0    | 8.0   | 2.0  | 0.0  |
| 21UR-17770 | 0.0    | 1.0   | 0.0    | 0.0   | 0.0  | 0.0  |
| 21UR-17780 | 0.0    | 0.0   | 0.0    | 0.0   | 0.0  | 0.0  |
| 21UR-17790 | 6.0    | 1.0   | 4.0    | 0.0   | 1.0  | 0.0  |
| 21UR-1780  | 14.0   | 1.0   | 2.0    | 0.0   | 4.0  | 0.0  |
| 21UR-17800 | 75.0   | 7.0   | 45.0   | 15.0  | 19.0 | 1.0  |
| 21UR-17820 | 0.0    | 0.0   | 0.0    | 1.0   | 1.0  | 0.0  |
| 21UR-17830 | 0.0    | 4.0   | 0.0    | 0.0   | 0.0  | 0.0  |
| 21UR-17840 | 78.0   | 34.0  | 51.0   | 31.0  | 38.0 | 3.0  |
| 21UR-17850 | 0.0    | 0.0   | 0.0    | 0.0   | 0.0  | 0.0  |
| 21UR-17860 | 0.0    | 0.0   | 0.0    | 0.0   | 0.0  | 0.0  |
| 21UR-17870 | 34.0   | 10.0  | 29.0   | 6.0   | 17.0 | 4.0  |
| 21UR-17880 | 1.0    | 0.0   | 1.0    | 0.0   | 0.0  | 0.0  |
| 21UR-17890 | 1.0    | 0.0   | 0.0    | 0.0   | 1.0  | 0.0  |
| 21UR-1790  | 0.0    | 4.0   | 0.0    | 0.0   | 0.0  | 0.0  |
| 21UR-17900 | 1325.1 | 186.0 | 1313.0 | 548.0 | 73.0 | 20.0 |
| 21UR-17910 | 0.0    | 0.0   | 0.0    | 1.0   | 2.0  | 1.0  |
| 21UR-17920 | 0.0    | 0.0   | 0.0    | 0.0   | 1.0  | 0.0  |
| 21UR-17930 | 42.0   | 96.0  | 20.0   | 6.0   | 11.0 | 5.0  |
| 21UR-17940 | 0.0    | 0.0   | 2.0    | 0.0   | 0.0  | 0.0  |
| 21UR-17950 | 0.0    | 0.0   | 0.0    | 0.0   | 1.0  | 0.0  |
| 21UR-17960 | 106.0  | 10.0  | 102.0  | 50.0  | 23.0 | 10.0 |
| 21UR-17970 | 4.0    | 1.0   | 9.0    | 4.0   | 1.0  | 0.0  |
| 21UR-17980 | 0.0    | 0.0   | 0.0    | 0.0   | 0.0  | 0.0  |
| 21UR-17990 | 0.0    | 1.0   | 0.0    | 0.0   | 0.0  | 0.0  |

|            |        |       |        |        |        |       |
|------------|--------|-------|--------|--------|--------|-------|
| 21UR-180   | 4.0    | 4.0   | 0.0    | 0.0    | 1.0    | 1.0   |
| 21UR-1800  | 6.0    | 1.0   | 6.0    | 0.0    | 4.0    | 1.0   |
| 21UR-18000 | 101.0  | 12.0  | 99.0   | 105.0  | 30.1   | 6.0   |
| 21UR-18010 | 0.0    | 0.0   | 0.0    | 0.0    | 0.0    | 1.0   |
| 21UR-18020 | 0.0    | 0.0   | 1.0    | 0.0    | 0.0    | 0.0   |
| 21UR-18030 | 0.0    | 0.0   | 0.0    | 0.0    | 0.0    | 0.0   |
| 21UR-18040 | 1.0    | 0.0   | 4.0    | 1.0    | 0.0    | 0.0   |
| 21UR-18050 | 0.0    | 0.0   | 0.0    | 0.0    | 0.0    | 0.0   |
| 21UR-18060 | 0.0    | 0.0   | 0.0    | 0.0    | 0.0    | 0.0   |
| 21UR-18070 | 1.0    | 1.0   | 4.0    | 0.0    | 0.0    | 0.0   |
| 21UR-18080 | 6.0    | 5.0   | 0.0    | 0.0    | 8.0    | 1.0   |
| 21UR-18090 | 6.0    | 0.0   | 6.0    | 1.0    | 6.0    | 1.0   |
| 21UR-1810  | 0.0    | 0.0   | 0.0    | 0.0    | 0.0    | 0.0   |
| 21UR-18100 | 0.0    | 0.0   | 0.0    | 0.0    | 0.0    | 0.0   |
| 21UR-18110 | 0.0    | 0.0   | 0.0    | 0.0    | 0.0    | 0.0   |
| 21UR-18120 | 2.0    | 0.0   | 1.0    | 0.0    | 1.0    | 0.0   |
| 21UR-18130 | 0.0    | 0.0   | 0.0    | 0.0    | 0.0    | 0.0   |
| 21UR-18140 | 0.0    | 1.0   | 0.0    | 0.0    | 1.0    | 0.0   |
| 21UR-18150 | 0.0    | 0.0   | 0.0    | 0.0    | 4.0    | 0.0   |
| 21UR-18160 | 13.0   | 7.0   | 8.0    | 0.0    | 29.0   | 0.0   |
| 21UR-18170 | 0.0    | 0.0   | 0.0    | 0.0    | 0.0    | 0.0   |
| 21UR-18180 | 1.0    | 0.0   | 0.0    | 0.0    | 1.0    | 0.0   |
| 21UR-18190 | 0.0    | 0.0   | 0.0    | 0.0    | 0.0    | 0.0   |
| 21UR-1820  | 38.0   | 4.0   | 34.0   | 15.0   | 23.0   | 0.0   |
| 21UR-18200 | 0.0    | 1.0   | 6.0    | 0.0    | 2.0    | 0.0   |
| 21UR-18210 | 103.0  | 19.0  | 69.5   | 36.0   | 24.0   | 6.0   |
| 21UR-18220 | 72.0   | 20.0  | 98.5   | 18.0   | 17.0   | 4.0   |
| 21UR-18240 | 21.5   | 3.7   | 15.5   | 8.0    | 3.0    | 0.0   |
| 21UR-18250 | 1551.7 | 78.1  | 1420.5 | 1548.0 | 263.0  | 16.0  |
| 21UR-18260 | 0.0    | 0.0   | 0.0    | 0.0    | 0.0    | 0.0   |
| 21UR-18270 | 0.0    | 1.0   | 1.0    | 0.0    | 0.0    | 0.0   |
| 21UR-18280 | 1.0    | 1.0   | 0.0    | 1.0    | 0.0    | 0.0   |
| 21UR-18290 | 0.0    | 0.0   | 0.0    | 0.0    | 0.0    | 0.0   |
| 21UR-1830  | 734.5  | 52.0  | 548.0  | 156.0  | 87.0   | 1.0   |
| 21UR-18300 | 0.0    | 0.0   | 0.0    | 0.0    | 0.0    | 0.0   |
| 21UR-18310 | 4.0    | 0.0   | 1.0    | 1.0    | 0.0    | 0.0   |
| 21UR-18320 | 180.0  | 29.0  | 156.0  | 49.0   | 104.3  | 1.0   |
| 21UR-18330 | 226.0  | 27.0  | 186.0  | 53.0   | 20.0   | 2.0   |
| 21UR-18340 | 0.0    | 0.0   | 1.0    | 0.0    | 0.0    | 0.0   |
| 21UR-18350 | 0.0    | 0.0   | 0.0    | 0.0    | 0.0    | 0.0   |
| 21UR-18360 | 1.0    | 0.0   | 4.0    | 4.0    | 3.0    | 0.0   |
| 21UR-18370 | 1.0    | 1.0   | 4.0    | 0.0    | 4.0    | 0.0   |
| 21UR-18380 | 1269.5 | 972.2 | 843.2  | 455.0  | 1692.8 | 158.0 |
| 21UR-18390 | 0.0    | 0.0   | 0.0    | 0.0    | 0.0    | 0.0   |
| 21UR-1840  | 0.0    | 0.0   | 0.0    | 0.0    | 0.0    | 0.0   |
| 21UR-18400 | 0.0    | 0.0   | 0.0    | 0.0    | 0.0    | 0.0   |
| 21UR-18410 | 0.0    | 0.0   | 6.0    | 0.0    | 0.0    | 0.0   |
| 21UR-18420 | 1.0    | 0.0   | 0.0    | 1.0    | 0.0    | 0.0   |
| 21UR-18430 | 0.0    | 0.0   | 0.0    | 0.0    | 0.0    | 0.0   |
| 21UR-18440 | 1.0    | 0.5   | 0.0    | 0.0    | 4.0    | 0.0   |
| 21UR-18450 | 2.0    | 1.0   | 3.0    | 4.0    | 5.0    | 0.0   |

|            |        |       |       |       |       |      |
|------------|--------|-------|-------|-------|-------|------|
| 21UR-18460 | 13.0   | 0.0   | 1.0   | 1.0   | 0.0   | 1.0  |
| 21UR-18470 | 2.0    | 45.0  | 1.0   | 2.0   | 47.2  | 4.0  |
| 21UR-18480 | 1211.0 | 170.0 | 802.0 | 589.0 | 781.8 | 22.0 |
| 21UR-18490 | 0.0    | 1.0   | 0.0   | 0.0   | 4.0   | 0.0  |
| 21UR-1850  | 0.0    | 4.0   | 0.0   | 0.0   | 0.0   | 0.0  |
| 21UR-18500 | 132.0  | 8.0   | 90.0  | 34.0  | 3.0   | 4.0  |
| 21UR-18510 | 1.0    | 0.0   | 0.0   | 0.0   | 0.0   | 0.0  |
| 21UR-18520 | 1.0    | 7.0   | 4.0   | 0.0   | 0.0   | 3.0  |
| 21UR-18530 | 0.0    | 0.0   | 0.0   | 0.0   | 0.0   | 0.0  |
| 21UR-18550 | 3.0    | 1.0   | 1.0   | 0.0   | 3.3   | 0.1  |
| 21UR-18560 | 1.0    | 0.0   | 0.0   | 0.0   | 0.0   | 0.0  |
| 21UR-18570 | 8.0    | 0.0   | 4.0   | 0.0   | 1.0   | 0.0  |
| 21UR-18580 | 0.0    | 0.0   | 0.0   | 0.0   | 0.0   | 0.0  |
| 21UR-18590 | 0.0    | 4.0   | 0.0   | 0.0   | 1.0   | 3.0  |
| 21UR-1860  | 0.0    | 0.0   | 0.0   | 0.0   | 0.0   | 0.0  |
| 21UR-18600 | 1.0    | 0.0   | 1.0   | 0.0   | 0.0   | 0.0  |
| 21UR-18610 | 245.0  | 1.6   | 126.0 | 67.0  | 1.0   | 1.0  |
| 21UR-18620 | 4.0    | 1.0   | 4.0   | 1.0   | 4.0   | 0.0  |
| 21UR-18630 | 5.0    | 22.0  | 14.0  | 0.0   | 13.0  | 1.0  |
| 21UR-18640 | 0.0    | 0.0   | 0.0   | 0.0   | 0.0   | 1.0  |
| 21UR-18650 | 6.0    | 10.0  | 8.0   | 4.0   | 43.0  | 4.0  |
| 21UR-18660 | 0.0    | 0.0   | 0.0   | 0.0   | 1.0   | 0.0  |
| 21UR-18670 | 0.0    | 0.0   | 0.0   | 0.0   | 0.0   | 0.0  |
| 21UR-18680 | 44.0   | 1.0   | 17.0  | 8.0   | 0.0   | 0.0  |
| 21UR-18690 | 0.0    | 0.0   | 0.0   | 0.0   | 2.0   | 0.0  |
| 21UR-1870  | 0.0    | 0.0   | 0.0   | 0.0   | 0.0   | 1.0  |
| 21UR-18700 | 0.0    | 0.0   | 0.0   | 0.0   | 0.0   | 0.0  |
| 21UR-18710 | 25.0   | 26.0  | 20.0  | 5.0   | 9.0   | 2.0  |
| 21UR-18720 | 4.0    | 1.0   | 0.0   | 0.0   | 0.0   | 0.0  |
| 21UR-18730 | 0.0    | 1.0   | 0.0   | 0.0   | 0.0   | 0.0  |
| 21UR-18740 | 148.0  | 98.1  | 167.0 | 43.0  | 208.0 | 11.0 |
| 21UR-18750 | 4.0    | 1.0   | 0.0   | 0.0   | 2.0   | 0.0  |
| 21UR-18760 | 745.3  | 191.2 | 515.0 | 436.0 | 173.5 | 38.5 |
| 21UR-18770 | 0.0    | 0.0   | 1.0   | 1.0   | 0.0   | 1.0  |
| 21UR-18780 | 0.0    | 0.0   | 0.0   | 0.0   | 1.0   | 0.0  |
| 21UR-18790 | 0.0    | 0.0   | 0.0   | 0.0   | 0.0   | 0.0  |
| 21UR-1880  | 0.0    | 0.0   | 6.0   | 0.0   | 1.0   | 0.0  |
| 21UR-18800 | 0.0    | 0.0   | 0.0   | 0.0   | 0.0   | 0.0  |
| 21UR-18810 | 1.0    | 1.0   | 1.0   | 0.0   | 0.0   | 0.0  |
| 21UR-18820 | 18.0   | 1.0   | 9.0   | 12.0  | 36.0  | 0.0  |
| 21UR-18830 | 0.0    | 0.0   | 1.0   | 0.0   | 0.0   | 1.0  |
| 21UR-18840 | 27.0   | 0.0   | 26.0  | 13.0  | 4.0   | 0.0  |
| 21UR-18850 | 0.0    | 2.0   | 0.0   | 0.0   | 0.0   | 0.0  |
| 21UR-18860 | 0.0    | 2.0   | 0.0   | 0.0   | 6.0   | 0.0  |
| 21UR-18870 | 0.0    | 0.0   | 0.0   | 0.0   | 1.1   | 0.0  |
| 21UR-18880 | 14.0   | 0.0   | 10.0  | 0.0   | 1.0   | 1.0  |
| 21UR-18890 | 0.0    | 8.0   | 2.0   | 0.0   | 2.0   | 0.0  |
| 21UR-1890  | 14.0   | 15.0  | 4.0   | 8.0   | 7.0   | 4.0  |
| 21UR-18900 | 0.0    | 0.0   | 0.0   | 0.0   | 0.0   | 0.0  |
| 21UR-18910 | 0.0    | 0.0   | 0.0   | 0.0   | 0.0   | 0.0  |
| 21UR-18920 | 11.0   | 7.0   | 6.0   | 4.0   | 2.0   | 0.0  |

|            |       |       |       |       |       |      |
|------------|-------|-------|-------|-------|-------|------|
| 21UR-18930 | 13.0  | 5.0   | 3.0   | 6.0   | 15.0  | 4.0  |
| 21UR-18940 | 0.0   | 0.1   | 0.0   | 1.0   | 4.0   | 0.0  |
| 21UR-18950 | 1.0   | 0.0   | 1.0   | 0.0   | 0.0   | 0.0  |
| 21UR-18960 | 16.0  | 16.0  | 6.0   | 0.0   | 10.0  | 0.0  |
| 21UR-18980 | 0.0   | 0.0   | 0.0   | 0.0   | 0.0   | 0.0  |
| 21UR-18990 | 0.0   | 0.0   | 0.0   | 0.0   | 0.0   | 0.0  |
| 21UR-1900  | 1.0   | 2.0   | 2.0   | 0.0   | 1.0   | 0.0  |
| 21UR-19000 | 0.0   | 0.0   | 0.0   | 0.0   | 0.0   | 0.0  |
| 21UR-19010 | 0.0   | 0.0   | 0.0   | 1.0   | 0.0   | 0.0  |
| 21UR-19020 | 16.0  | 6.0   | 3.0   | 4.0   | 0.0   | 0.0  |
| 21UR-19030 | 0.0   | 1.0   | 4.0   | 0.0   | 4.0   | 1.0  |
| 21UR-19040 | 6.0   | 0.0   | 1.0   | 0.0   | 6.3   | 0.0  |
| 21UR-19050 | 0.0   | 0.0   | 0.0   | 0.0   | 0.0   | 1.0  |
| 21UR-19060 | 0.0   | 1.0   | 1.0   | 0.0   | 4.0   | 0.0  |
| 21UR-19070 | 4.0   | 0.0   | 5.0   | 0.0   | 0.0   | 0.0  |
| 21UR-19080 | 0.0   | 0.0   | 0.0   | 0.0   | 0.0   | 0.0  |
| 21UR-19090 | 22.0  | 11.0  | 22.0  | 14.3  | 27.1  | 0.0  |
| 21UR-1910  | 0.0   | 0.0   | 0.0   | 0.0   | 0.0   | 0.0  |
| 21UR-19100 | 0.0   | 0.0   | 1.0   | 0.0   | 1.0   | 0.0  |
| 21UR-19110 | 58.0  | 3.0   | 57.0  | 26.0  | 12.0  | 0.0  |
| 21UR-19120 | 38.0  | 3.0   | 33.0  | 3.0   | 10.0  | 1.0  |
| 21UR-19130 | 1.0   | 0.0   | 1.0   | 0.0   | 2.0   | 0.0  |
| 21UR-19140 | 4.0   | 0.0   | 1.0   | 1.0   | 1.0   | 0.0  |
| 21UR-19150 | 0.0   | 0.0   | 0.0   | 0.0   | 1.0   | 1.0  |
| 21UR-19160 | 0.0   | 0.0   | 0.0   | 0.0   | 0.0   | 0.0  |
| 21UR-19170 | 0.0   | 1.0   | 0.0   | 0.0   | 0.0   | 0.0  |
| 21UR-19180 | 1.0   | 5.4   | 1.0   | 0.0   | 4.0   | 0.0  |
| 21UR-19190 | 517.0 | 134.0 | 468.0 | 319.7 | 189.7 | 18.0 |
| 21UR-1920  | 11.0  | 6.0   | 14.0  | 1.0   | 4.0   | 1.0  |
| 21UR-19200 | 1.0   | 0.0   | 0.0   | 0.0   | 4.0   | 0.0  |
| 21UR-19210 | 0.0   | 0.0   | 3.0   | 0.0   | 4.0   | 1.0  |
| 21UR-19220 | 0.0   | 0.0   | 0.0   | 0.0   | 0.0   | 0.0  |
| 21UR-19230 | 0.0   | 2.0   | 1.0   | 1.0   | 0.0   | 1.0  |
| 21UR-19240 | 4.0   | 6.0   | 11.0  | 1.0   | 8.0   | 1.0  |
| 21UR-19250 | 4.0   | 0.0   | 2.0   | 0.0   | 0.0   | 0.0  |
| 21UR-19260 | 0.0   | 0.0   | 0.0   | 0.0   | 0.0   | 0.0  |
| 21UR-19270 | 1.0   | 0.0   | 0.0   | 0.0   | 0.0   | 0.0  |
| 21UR-19280 | 0.0   | 0.0   | 0.0   | 0.0   | 0.0   | 1.0  |
| 21UR-19290 | 10.0  | 16.0  | 24.0  | 1.0   | 88.0  | 1.0  |
| 21UR-1930  | 0.0   | 0.0   | 0.0   | 0.0   | 0.0   | 0.0  |
| 21UR-19300 | 12.0  | 3.0   | 22.0  | 1.0   | 4.0   | 0.0  |
| 21UR-19310 | 0.0   | 0.0   | 0.0   | 0.0   | 0.0   | 0.0  |
| 21UR-19320 | 17.0  | 8.0   | 11.0  | 9.0   | 4.0   | 2.0  |
| 21UR-19330 | 0.0   | 0.0   | 0.0   | 0.0   | 1.0   | 0.0  |
| 21UR-19340 | 10.0  | 5.0   | 6.0   | 4.0   | 10.0  | 1.0  |
| 21UR-19350 | 0.0   | 0.0   | 0.0   | 0.0   | 0.0   | 0.0  |
| 21UR-19360 | 0.0   | 0.0   | 0.0   | 0.0   | 0.0   | 0.0  |
| 21UR-19370 | 0.0   | 0.0   | 0.0   | 0.0   | 0.0   | 0.0  |
| 21UR-19380 | 0.0   | 0.0   | 0.0   | 0.0   | 0.0   | 0.0  |
| 21UR-19390 | 27.0  | 13.0  | 44.0  | 9.0   | 29.0  | 0.0  |
| 21UR-1940  | 402.5 | 100.0 | 306.5 | 82.0  | 40.0  | 8.4  |

|            |       |       |       |       |       |      |
|------------|-------|-------|-------|-------|-------|------|
| 21UR-19400 | 0.0   | 1.0   | 6.0   | 6.0   | 30.0  | 1.0  |
| 21UR-19410 | 0.0   | 0.0   | 0.0   | 0.0   | 0.0   | 0.0  |
| 21UR-19420 | 1.0   | 0.0   | 6.0   | 0.0   | 1.1   | 0.0  |
| 21UR-19430 | 624.0 | 29.0  | 319.0 | 125.0 | 67.0  | 9.0  |
| 21UR-19440 | 45.0  | 8.0   | 30.0  | 12.0  | 19.0  | 4.0  |
| 21UR-19450 | 4.0   | 1.0   | 8.0   | 1.0   | 1.0   | 0.0  |
| 21UR-19460 | 276.0 | 51.0  | 219.0 | 158.0 | 117.7 | 5.0  |
| 21UR-19470 | 4.0   | 6.0   | 12.0  | 1.0   | 0.0   | 0.0  |
| 21UR-19480 | 0.0   | 0.0   | 0.0   | 0.0   | 0.0   | 0.0  |
| 21UR-19490 | 690.5 | 359.0 | 684.0 | 409.0 | 383.5 | 38.0 |
| 21UR-1950  | 0.0   | 0.0   | 0.0   | 0.0   | 0.0   | 0.0  |
| 21UR-19500 | 0.0   | 4.0   | 0.0   | 0.0   | 2.0   | 0.0  |
| 21UR-19510 | 131.5 | 40.5  | 87.0  | 55.0  | 33.5  | 5.0  |
| 21UR-19520 | 1.0   | 7.0   | 4.0   | 0.0   | 9.0   | 8.0  |
| 21UR-19530 | 4.0   | 0.0   | 3.0   | 0.0   | 0.0   | 0.0  |
| 21UR-19540 | 12.0  | 4.0   | 1.0   | 4.0   | 1.0   | 0.0  |
| 21UR-19550 | 1.0   | 4.0   | 1.0   | 0.0   | 4.0   | 0.0  |
| 21UR-19560 | 47.0  | 16.0  | 49.0  | 11.0  | 8.0   | 4.0  |
| 21UR-19570 | 1.0   | 0.0   | 0.0   | 0.0   | 2.0   | 0.0  |
| 21UR-19580 | 0.0   | 0.0   | 1.0   | 0.0   | 4.0   | 0.0  |
| 21UR-1960  | 0.0   | 1.0   | 1.0   | 0.0   | 0.0   | 0.0  |
| 21UR-19600 | 12.0  | 34.0  | 16.0  | 8.0   | 29.0  | 7.0  |
| 21UR-19610 | 49.0  | 39.0  | 66.0  | 20.0  | 57.0  | 17.0 |
| 21UR-19620 | 12.0  | 7.0   | 8.0   | 4.0   | 8.0   | 0.0  |
| 21UR-19630 | 0.0   | 0.0   | 0.0   | 0.0   | 0.0   | 0.0  |
| 21UR-19640 | 0.0   | 8.0   | 3.0   | 0.0   | 0.0   | 0.0  |
| 21UR-19650 | 0.0   | 0.0   | 0.0   | 0.0   | 0.0   | 0.0  |
| 21UR-19660 | 2.0   | 1.0   | 1.0   | 1.0   | 13.0  | 0.0  |
| 21UR-19670 | 0.0   | 0.0   | 1.0   | 0.0   | 1.0   | 0.0  |
| 21UR-19680 | 0.0   | 0.0   | 0.0   | 0.0   | 1.0   | 0.0  |
| 21UR-19690 | 8.0   | 3.0   | 8.0   | 6.0   | 0.0   | 0.0  |
| 21UR-1970  | 8.0   | 2.0   | 1.0   | 1.0   | 8.0   | 0.0  |
| 21UR-19700 | 1.0   | 0.0   | 0.0   | 0.0   | 0.0   | 0.0  |
| 21UR-19710 | 4.0   | 0.0   | 1.0   | 0.0   | 0.0   | 0.0  |
| 21UR-19720 | 14.0  | 23.5  | 14.0  | 3.0   | 27.0  | 1.0  |
| 21UR-19730 | 0.0   | 1.0   | 5.0   | 0.0   | 1.0   | 1.0  |
| 21UR-19740 | 3.0   | 1.0   | 10.0  | 0.0   | 6.0   | 4.0  |
| 21UR-19750 | 1.0   | 0.0   | 0.0   | 0.0   | 0.0   | 0.0  |
| 21UR-19760 | 0.0   | 0.0   | 0.0   | 0.0   | 0.0   | 0.0  |
| 21UR-19770 | 0.0   | 0.0   | 0.0   | 0.0   | 1.0   | 0.0  |
| 21UR-19780 | 0.0   | 0.0   | 0.0   | 0.0   | 0.0   | 0.0  |
| 21UR-19790 | 4.0   | 17.0  | 4.0   | 4.0   | 13.0  | 0.0  |
| 21UR-1980  | 0.0   | 0.0   | 0.0   | 0.0   | 1.0   | 0.0  |
| 21UR-19800 | 0.0   | 0.0   | 0.0   | 0.0   | 0.0   | 0.0  |
| 21UR-19810 | 0.0   | 8.0   | 0.0   | 0.0   | 1.0   | 1.0  |
| 21UR-19820 | 0.0   | 0.0   | 0.0   | 0.0   | 0.0   | 0.0  |
| 21UR-19830 | 41.0  | 22.0  | 30.0  | 10.0  | 60.0  | 4.0  |
| 21UR-19840 | 8.0   | 8.0   | 6.0   | 1.0   | 16.0  | 0.0  |
| 21UR-19860 | 6.0   | 1.0   | 6.0   | 0.0   | 10.0  | 1.0  |
| 21UR-19870 | 11.0  | 1.0   | 10.0  | 0.0   | 1.0   | 3.0  |
| 21UR-19880 | 0.0   | 0.0   | 0.0   | 1.0   | 0.0   | 0.0  |

|            |       |      |       |      |      |     |
|------------|-------|------|-------|------|------|-----|
| 21UR-19890 | 0.0   | 0.0  | 0.0   | 0.0  | 0.0  | 0.0 |
| 21UR-1990  | 4.0   | 0.0  | 0.0   | 0.0  | 0.0  | 0.0 |
| 21UR-19900 | 0.0   | 0.0  | 0.0   | 0.0  | 0.0  | 0.0 |
| 21UR-19910 | 0.0   | 0.0  | 0.0   | 0.0  | 0.0  | 0.0 |
| 21UR-19920 | 18.0  | 1.0  | 9.0   | 4.0  | 1.0  | 6.0 |
| 21UR-19930 | 0.0   | 0.0  | 0.0   | 0.0  | 0.0  | 0.0 |
| 21UR-19940 | 0.0   | 0.0  | 0.0   | 0.0  | 0.0  | 0.0 |
| 21UR-19950 | 0.0   | 5.0  | 10.0  | 0.0  | 1.0  | 0.0 |
| 21UR-19960 | 0.0   | 0.0  | 0.0   | 0.0  | 0.0  | 0.0 |
| 21UR-19970 | 11.0  | 8.0  | 6.0   | 0.0  | 6.0  | 0.0 |
| 21UR-19980 | 0.0   | 1.0  | 0.0   | 0.0  | 0.0  | 0.0 |
| 21UR-19990 | 0.0   | 0.0  | 0.0   | 0.0  | 1.0  | 0.0 |
| 21UR-20    | 1.0   | 1.0  | 0.0   | 0.0  | 0.0  | 0.0 |
| 21UR-200   | 0.0   | 1.0  | 1.0   | 4.0  | 0.0  | 0.0 |
| 21UR-2000  | 0.0   | 0.0  | 0.0   | 0.0  | 0.0  | 0.0 |
| 21UR-20000 | 74.0  | 18.0 | 76.0  | 43.0 | 8.0  | 4.0 |
| 21UR-20010 | 0.0   | 1.0  | 0.0   | 0.0  | 0.0  | 0.0 |
| 21UR-20020 | 3.0   | 6.0  | 6.0   | 0.0  | 0.0  | 1.0 |
| 21UR-20030 | 0.0   | 0.0  | 0.0   | 0.0  | 0.0  | 0.0 |
| 21UR-20040 | 0.0   | 2.0  | 0.0   | 0.0  | 0.0  | 0.0 |
| 21UR-20050 | 4.0   | 4.0  | 4.0   | 2.0  | 0.0  | 0.0 |
| 21UR-20060 | 32.0  | 5.0  | 15.0  | 2.0  | 8.0  | 0.0 |
| 21UR-20070 | 2.0   | 2.0  | 1.0   | 0.0  | 1.0  | 0.0 |
| 21UR-20080 | 4.0   | 0.0  | 1.0   | 0.0  | 0.0  | 0.0 |
| 21UR-20090 | 0.0   | 0.0  | 0.0   | 0.0  | 0.0  | 0.0 |
| 21UR-2010  | 1.0   | 0.0  | 4.0   | 0.0  | 1.0  | 0.0 |
| 21UR-20100 | 0.0   | 0.0  | 0.0   | 0.0  | 0.0  | 0.0 |
| 21UR-20110 | 0.0   | 0.0  | 0.0   | 0.0  | 0.0  | 0.0 |
| 21UR-20120 | 0.0   | 0.0  | 0.0   | 0.0  | 0.3  | 0.0 |
| 21UR-20130 | 1.0   | 10.0 | 0.0   | 0.0  | 2.0  | 0.0 |
| 21UR-20140 | 181.0 | 5.0  | 141.0 | 58.0 | 1.0  | 1.0 |
| 21UR-20150 | 1.0   | 4.0  | 1.0   | 0.0  | 1.0  | 0.0 |
| 21UR-20160 | 42.0  | 24.0 | 46.0  | 29.0 | 39.0 | 2.0 |
| 21UR-20170 | 0.0   | 0.0  | 0.0   | 0.0  | 0.0  | 0.0 |
| 21UR-20180 | 0.0   | 0.0  | 0.0   | 0.0  | 0.0  | 0.0 |
| 21UR-20190 | 0.0   | 0.0  | 0.0   | 0.0  | 0.0  | 0.0 |
| 21UR-2020  | 0.0   | 0.0  | 0.0   | 0.0  | 1.0  | 0.0 |
| 21UR-20200 | 0.0   | 0.0  | 1.0   | 0.0  | 0.0  | 0.0 |
| 21UR-20210 | 0.0   | 0.0  | 0.0   | 0.0  | 3.0  | 0.0 |
| 21UR-20220 | 0.0   | 0.0  | 0.0   | 0.0  | 0.0  | 0.0 |
| 21UR-20230 | 0.0   | 0.0  | 0.0   | 0.0  | 0.0  | 0.0 |
| 21UR-20240 | 1.0   | 6.0  | 1.0   | 0.0  | 1.0  | 2.0 |
| 21UR-20250 | 1.0   | 0.0  | 1.0   | 0.0  | 0.0  | 0.0 |
| 21UR-20260 | 50.0  | 13.0 | 34.0  | 12.0 | 26.0 | 0.0 |
| 21UR-20270 | 0.0   | 0.0  | 0.0   | 0.0  | 0.0  | 0.0 |
| 21UR-20280 | 1.0   | 0.0  | 3.0   | 0.0  | 0.0  | 0.0 |
| 21UR-20290 | 0.0   | 0.0  | 0.0   | 0.0  | 0.0  | 0.0 |
| 21UR-20300 | 22.0  | 9.2  | 8.0   | 14.0 | 5.0  | 1.0 |
| 21UR-20310 | 1.0   | 0.0  | 0.0   | 0.0  | 0.0  | 0.0 |
| 21UR-20320 | 7.0   | 31.0 | 5.0   | 9.0  | 42.0 | 3.0 |
| 21UR-20330 | 0.0   | 0.0  | 0.0   | 0.0  | 0.0  | 0.0 |



|            |       |      |       |       |      |      |
|------------|-------|------|-------|-------|------|------|
| 21UR-20340 | 4.0   | 4.0  | 4.0   | 0.0   | 1.0  | 1.0  |
| 21UR-20350 | 1.0   | 1.0  | 1.0   | 0.0   | 7.0  | 1.0  |
| 21UR-20360 | 0.0   | 0.0  | 0.0   | 0.0   | 1.0  | 0.0  |
| 21UR-20370 | 58.0  | 20.0 | 46.0  | 29.0  | 13.0 | 10.0 |
| 21UR-20380 | 7.0   | 4.0  | 1.0   | 3.0   | 0.0  | 0.0  |
| 21UR-20390 | 0.0   | 10.0 | 0.0   | 4.0   | 8.0  | 1.0  |
| 21UR-2040  | 0.0   | 0.0  | 0.0   | 0.0   | 0.0  | 0.0  |
| 21UR-20400 | 4.0   | 0.0  | 0.0   | 1.0   | 1.0  | 0.0  |
| 21UR-20410 | 0.0   | 1.0  | 6.0   | 1.0   | 1.0  | 0.0  |
| 21UR-20420 | 29.0  | 38.0 | 39.0  | 18.0  | 29.7 | 10.0 |
| 21UR-20430 | 0.0   | 0.0  | 0.0   | 0.0   | 2.0  | 0.0  |
| 21UR-20440 | 0.0   | 0.0  | 0.0   | 0.0   | 0.0  | 0.0  |
| 21UR-20450 | 0.0   | 1.0  | 0.0   | 0.0   | 1.0  | 0.0  |
| 21UR-20460 | 0.0   | 0.0  | 0.0   | 0.0   | 0.0  | 0.0  |
| 21UR-20470 | 1.0   | 1.0  | 0.0   | 0.0   | 1.0  | 0.0  |
| 21UR-20480 | 0.0   | 0.0  | 0.0   | 0.0   | 0.0  | 0.0  |
| 21UR-20490 | 0.0   | 6.0  | 3.0   | 0.0   | 3.0  | 0.0  |
| 21UR-2050  | 0.0   | 3.3  | 0.0   | 0.0   | 0.0  | 0.0  |
| 21UR-20500 | 0.0   | 2.0  | 1.0   | 0.0   | 1.0  | 0.0  |
| 21UR-20510 | 0.0   | 0.0  | 0.0   | 0.0   | 0.0  | 0.0  |
| 21UR-20520 | 0.0   | 0.0  | 0.0   | 0.0   | 0.0  | 0.0  |
| 21UR-20530 | 6.0   | 1.0  | 0.0   | 0.0   | 0.0  | 1.0  |
| 21UR-20540 | 0.0   | 0.0  | 0.0   | 0.0   | 0.0  | 0.0  |
| 21UR-20550 | 75.0  | 18.0 | 78.0  | 19.0  | 22.0 | 2.0  |
| 21UR-20560 | 41.0  | 2.0  | 21.0  | 13.0  | 6.0  | 0.0  |
| 21UR-20570 | 2.0   | 2.5  | 0.0   | 0.0   | 1.0  | 2.0  |
| 21UR-20580 | 52.3  | 2.0  | 50.0  | 28.0  | 17.8 | 1.0  |
| 21UR-20590 | 59.0  | 11.1 | 36.0  | 17.0  | 6.0  | 0.0  |
| 21UR-2060  | 0.0   | 0.0  | 0.0   | 0.0   | 0.0  | 0.0  |
| 21UR-20600 | 0.0   | 0.0  | 0.0   | 0.0   | 0.0  | 0.0  |
| 21UR-20610 | 74.0  | 42.0 | 58.0  | 49.0  | 45.0 | 7.0  |
| 21UR-20620 | 87.0  | 23.0 | 72.0  | 26.0  | 26.0 | 5.0  |
| 21UR-20630 | 3.0   | 1.0  | 6.0   | 1.0   | 4.0  | 2.0  |
| 21UR-20640 | 1.0   | 0.0  | 2.0   | 0.0   | 0.0  | 0.0  |
| 21UR-20650 | 0.0   | 0.0  | 0.0   | 0.0   | 0.0  | 0.0  |
| 21UR-20660 | 0.0   | 0.0  | 0.0   | 0.0   | 0.0  | 0.0  |
| 21UR-20670 | 0.0   | 0.0  | 0.0   | 0.0   | 0.0  | 0.0  |
| 21UR-20680 | 0.0   | 0.0  | 0.0   | 0.0   | 0.0  | 0.0  |
| 21UR-20690 | 0.0   | 0.0  | 0.0   | 0.0   | 0.0  | 0.0  |
| 21UR-2070  | 1.0   | 3.0  | 6.0   | 0.0   | 0.0  | 0.0  |
| 21UR-20700 | 63.0  | 14.0 | 43.0  | 0.0   | 7.0  | 1.0  |
| 21UR-20710 | 0.0   | 1.0  | 0.0   | 0.0   | 1.0  | 0.0  |
| 21UR-20720 | 0.0   | 0.0  | 0.0   | 0.0   | 1.0  | 0.0  |
| 21UR-20730 | 339.3 | 16.1 | 296.0 | 102.0 | 99.0 | 5.0  |
| 21UR-20740 | 12.0  | 1.0  | 6.0   | 4.0   | 4.0  | 1.0  |
| 21UR-20750 | 0.0   | 1.0  | 1.0   | 0.0   | 0.0  | 0.0  |
| 21UR-20760 | 1.0   | 3.5  | 4.0   | 0.0   | 3.0  | 1.0  |
| 21UR-20770 | 0.0   | 8.0  | 0.0   | 0.0   | 4.0  | 0.0  |
| 21UR-20780 | 8.0   | 0.0  | 3.0   | 1.0   | 6.0  | 0.0  |
| 21UR-20790 | 0.0   | 7.0  | 4.0   | 1.0   | 4.0  | 0.0  |
| 21UR-2080  | 9.0   | 57.0 | 0.0   | 4.0   | 19.0 | 11.0 |

|            |      |       |      |      |      |      |
|------------|------|-------|------|------|------|------|
| 21UR-20800 | 0.0  | 0.0   | 0.0  | 0.0  | 0.0  | 0.0  |
| 21UR-20810 | 0.0  | 0.0   | 0.0  | 0.0  | 1.0  | 0.0  |
| 21UR-20820 | 0.0  | 0.0   | 0.0  | 0.0  | 0.0  | 0.0  |
| 21UR-20830 | 0.0  | 0.0   | 0.0  | 0.0  | 0.0  | 1.0  |
| 21UR-20840 | 0.0  | 1.0   | 0.0  | 0.0  | 0.0  | 0.0  |
| 21UR-20850 | 0.0  | 0.0   | 0.0  | 0.0  | 0.0  | 0.0  |
| 21UR-20860 | 20.0 | 9.0   | 23.0 | 2.0  | 11.0 | 1.0  |
| 21UR-20870 | 11.0 | 0.0   | 1.0  | 4.0  | 0.0  | 0.0  |
| 21UR-20880 | 0.0  | 4.0   | 1.0  | 0.0  | 1.0  | 0.0  |
| 21UR-20890 | 0.0  | 0.0   | 0.0  | 0.0  | 0.0  | 0.0  |
| 21UR-2090  | 8.0  | 0.0   | 12.0 | 4.0  | 0.0  | 0.0  |
| 21UR-20900 | 5.0  | 2.0   | 3.0  | 1.0  | 1.0  | 1.0  |
| 21UR-20910 | 20.5 | 6.0   | 17.0 | 16.0 | 17.0 | 1.0  |
| 21UR-20920 | 0.0  | 0.0   | 0.0  | 0.0  | 0.0  | 0.0  |
| 21UR-20930 | 0.0  | 0.0   | 0.0  | 0.0  | 0.0  | 0.0  |
| 21UR-20940 | 0.0  | 0.0   | 0.0  | 0.0  | 1.0  | 0.0  |
| 21UR-20950 | 0.0  | 1.0   | 1.0  | 0.0  | 0.0  | 0.0  |
| 21UR-20960 | 0.0  | 2.8   | 0.0  | 0.0  | 0.0  | 0.3  |
| 21UR-20970 | 0.0  | 0.0   | 0.0  | 0.0  | 0.0  | 0.0  |
| 21UR-20980 | 0.0  | 0.0   | 0.0  | 0.0  | 0.0  | 0.0  |
| 21UR-20990 | 0.0  | 10.0  | 4.0  | 0.0  | 1.0  | 5.1  |
| 21UR-210   | 0.0  | 0.0   | 0.0  | 0.0  | 0.0  | 0.0  |
| 21UR-2100  | 0.0  | 0.0   | 0.0  | 0.0  | 0.0  | 0.0  |
| 21UR-21000 | 13.0 | 1.0   | 8.0  | 5.0  | 2.0  | 1.0  |
| 21UR-21010 | 2.0  | 4.0   | 2.0  | 1.0  | 7.0  | 5.0  |
| 21UR-21030 | 0.0  | 0.0   | 0.0  | 0.0  | 0.0  | 0.0  |
| 21UR-21040 | 0.0  | 0.0   | 0.0  | 0.0  | 0.0  | 1.0  |
| 21UR-21050 | 1.0  | 0.0   | 0.0  | 0.0  | 0.0  | 0.0  |
| 21UR-21060 | 58.3 | 45.0  | 38.0 | 9.0  | 33.0 | 8.0  |
| 21UR-21070 | 0.0  | 1.0   | 0.0  | 0.0  | 0.0  | 0.0  |
| 21UR-21090 | 0.0  | 0.0   | 0.0  | 0.0  | 0.0  | 0.0  |
| 21UR-2110  | 18.0 | 144.0 | 1.0  | 3.0  | 93.0 | 10.0 |
| 21UR-21100 | 0.0  | 11.0  | 1.0  | 0.0  | 33.0 | 4.0  |
| 21UR-21110 | 1.0  | 0.0   | 0.0  | 0.0  | 0.0  | 0.0  |
| 21UR-21120 | 51.0 | 0.0   | 85.0 | 16.0 | 10.0 | 0.0  |
| 21UR-21130 | 1.0  | 0.0   | 0.0  | 0.0  | 0.0  | 0.0  |
| 21UR-21140 | 4.0  | 0.0   | 4.0  | 0.0  | 0.0  | 0.0  |
| 21UR-21150 | 0.0  | 0.0   | 0.0  | 0.0  | 0.0  | 0.0  |
| 21UR-21160 | 0.0  | 0.0   | 0.0  | 0.0  | 0.0  | 0.0  |
| 21UR-21170 | 0.0  | 0.0   | 0.0  | 0.0  | 0.0  | 0.0  |
| 21UR-21180 | 12.0 | 2.0   | 10.0 | 4.0  | 3.0  | 4.0  |
| 21UR-21190 | 0.0  | 1.0   | 0.0  | 0.0  | 0.0  | 0.0  |
| 21UR-2120  | 0.0  | 4.0   | 1.0  | 0.0  | 6.0  | 0.0  |
| 21UR-21200 | 0.0  | 0.0   | 0.0  | 0.0  | 0.0  | 0.0  |
| 21UR-21210 | 1.0  | 0.0   | 0.0  | 0.0  | 4.0  | 1.0  |
| 21UR-21220 | 0.0  | 7.0   | 2.0  | 0.0  | 3.0  | 0.0  |
| 21UR-21230 | 38.0 | 1.0   | 37.0 | 6.0  | 0.0  | 1.0  |
| 21UR-21240 | 4.0  | 11.0  | 7.0  | 10.0 | 0.0  | 0.0  |
| 21UR-21250 | 0.0  | 2.0   | 0.0  | 1.0  | 1.0  | 1.0  |
| 21UR-21260 | 11.0 | 2.0   | 4.0  | 4.0  | 0.0  | 0.0  |
| 21UR-21270 | 34.0 | 6.5   | 31.0 | 12.0 | 18.0 | 4.0  |

|            |        |       |        |       |       |      |
|------------|--------|-------|--------|-------|-------|------|
| 21UR-21280 | 0.0    | 0.0   | 0.0    | 0.0   | 0.0   | 0.0  |
| 21UR-21290 | 28.0   | 40.0  | 18.0   | 11.0  | 57.0  | 0.0  |
| 21UR-2130  | 60.0   | 2.0   | 47.0   | 21.0  | 2.0   | 3.0  |
| 21UR-21310 | 5.0    | 1.0   | 0.0    | 4.0   | 11.0  | 5.0  |
| 21UR-21320 | 0.0    | 0.0   | 1.0    | 0.0   | 1.0   | 0.0  |
| 21UR-21330 | 0.0    | 0.0   | 0.0    | 0.0   | 0.0   | 0.0  |
| 21UR-21340 | 32.0   | 0.0   | 21.0   | 6.0   | 8.0   | 0.0  |
| 21UR-21350 | 0.0    | 1.0   | 0.0    | 0.0   | 0.0   | 0.0  |
| 21UR-21360 | 0.0    | 0.0   | 0.0    | 0.0   | 0.0   | 0.0  |
| 21UR-21370 | 0.0    | 0.0   | 0.0    | 0.0   | 0.0   | 0.0  |
| 21UR-21380 | 0.0    | 0.0   | 0.0    | 0.0   | 0.0   | 0.0  |
| 21UR-21390 | 12.0   | 18.0  | 9.0    | 8.0   | 25.0  | 4.0  |
| 21UR-2140  | 28.0   | 3.0   | 16.0   | 13.0  | 4.0   | 0.0  |
| 21UR-21400 | 0.0    | 0.0   | 0.0    | 0.0   | 0.0   | 0.0  |
| 21UR-21410 | 25.0   | 6.0   | 27.0   | 7.0   | 11.0  | 0.0  |
| 21UR-21420 | 4.0    | 1.0   | 1.0    | 0.0   | 1.0   | 0.0  |
| 21UR-21430 | 0.0    | 0.0   | 0.0    | 0.0   | 0.0   | 0.0  |
| 21UR-21440 | 1.0    | 0.0   | 0.0    | 0.0   | 6.0   | 0.0  |
| 21UR-21450 | 21.0   | 7.0   | 14.0   | 0.0   | 18.0  | 3.0  |
| 21UR-21460 | 1.0    | 0.0   | 0.0    | 0.0   | 0.0   | 0.0  |
| 21UR-21470 | 28.0   | 26.0  | 19.0   | 1.0   | 5.0   | 3.0  |
| 21UR-21480 | 0.0    | 0.0   | 0.0    | 0.0   | 0.0   | 0.0  |
| 21UR-21490 | 108.0  | 22.0  | 101.7  | 47.0  | 23.0  | 1.0  |
| 21UR-2150  | 22.0   | 0.0   | 10.0   | 8.0   | 7.0   | 1.0  |
| 21UR-21500 | 0.0    | 0.0   | 0.0    | 0.0   | 0.0   | 0.0  |
| 21UR-21510 | 0.0    | 12.0  | 1.0    | 0.0   | 0.0   | 0.0  |
| 21UR-21520 | 1.0    | 0.0   | 1.0    | 0.0   | 0.0   | 0.1  |
| 21UR-21530 | 0.0    | 0.0   | 0.0    | 0.0   | 0.0   | 0.0  |
| 21UR-21540 | 0.0    | 1.0   | 0.0    | 0.0   | 0.0   | 0.0  |
| 21UR-21550 | 88.0   | 17.0  | 102.0  | 26.0  | 12.0  | 3.0  |
| 21UR-21560 | 0.0    | 1.0   | 1.0    | 0.0   | 0.0   | 0.0  |
| 21UR-21570 | 33.0   | 35.5  | 30.0   | 24.5  | 49.5  | 5.0  |
| 21UR-21580 | 0.0    | 0.0   | 0.0    | 0.0   | 0.0   | 0.0  |
| 21UR-21590 | 4.0    | 1.0   | 0.0    | 0.0   | 0.0   | 0.0  |
| 21UR-2160  | 0.0    | 2.0   | 6.0    | 0.0   | 8.0   | 1.0  |
| 21UR-21600 | 0.0    | 2.0   | 0.0    | 0.0   | 0.0   | 0.0  |
| 21UR-21610 | 6.7    | 1.0   | 16.7   | 1.0   | 0.0   | 1.0  |
| 21UR-21620 | 4.0    | 1.0   | 0.0    | 0.0   | 1.0   | 0.0  |
| 21UR-21630 | 0.0    | 0.0   | 0.0    | 0.0   | 1.0   | 0.0  |
| 21UR-21640 | 2177.7 | 227.0 | 1619.0 | 742.0 | 680.3 | 35.0 |
| 21UR-21650 | 0.0    | 0.0   | 0.0    | 0.0   | 1.0   | 0.0  |
| 21UR-21660 | 0.0    | 1.0   | 0.0    | 0.0   | 0.0   | 0.0  |
| 21UR-21670 | 0.0    | 3.0   | 0.0    | 0.0   | 0.0   | 1.0  |
| 21UR-21680 | 1.0    | 22.0  | 2.0    | 1.0   | 18.0  | 5.0  |
| 21UR-21690 | 0.0    | 0.0   | 1.0    | 0.0   | 0.0   | 0.0  |
| 21UR-2170  | 1.0    | 3.0   | 2.0    | 1.0   | 3.0   | 0.0  |
| 21UR-21700 | 0.0    | 0.0   | 0.0    | 0.0   | 1.0   | 0.0  |
| 21UR-21710 | 1.0    | 6.0   | 0.0    | 0.0   | 0.0   | 1.0  |
| 21UR-21720 | 37.0   | 1.0   | 27.0   | 0.0   | 6.0   | 0.0  |
| 21UR-21730 | 12.0   | 4.0   | 4.0    | 9.0   | 9.0   | 0.0  |
| 21UR-21740 | 6.0    | 0.0   | 2.0    | 0.0   | 0.0   | 0.0  |

|            |       |       |       |      |       |      |
|------------|-------|-------|-------|------|-------|------|
| 21UR-21750 | 0.0   | 0.0   | 0.0   | 0.0  | 0.0   | 0.0  |
| 21UR-21760 | 4.0   | 0.0   | 3.0   | 0.0  | 1.0   | 0.0  |
| 21UR-21770 | 0.0   | 1.0   | 0.0   | 1.0  | 1.0   | 0.0  |
| 21UR-21790 | 145.0 | 16.0  | 69.0  | 19.0 | 16.0  | 1.0  |
| 21UR-2180  | 0.0   | 0.0   | 0.0   | 0.0  | 0.0   | 0.0  |
| 21UR-21800 | 8.0   | 1.0   | 5.0   | 6.0  | 2.0   | 0.0  |
| 21UR-21810 | 0.0   | 0.0   | 0.0   | 0.0  | 0.0   | 0.0  |
| 21UR-21820 | 6.0   | 0.0   | 8.0   | 4.0  | 4.0   | 1.0  |
| 21UR-21830 | 0.0   | 0.0   | 0.0   | 0.0  | 0.0   | 0.0  |
| 21UR-21840 | 0.0   | 0.0   | 0.0   | 0.0  | 0.0   | 0.0  |
| 21UR-21850 | 0.0   | 0.0   | 1.0   | 0.0  | 0.0   | 0.0  |
| 21UR-21860 | 0.0   | 2.0   | 0.0   | 0.0  | 4.0   | 0.0  |
| 21UR-21870 | 143.0 | 6.0   | 103.0 | 29.0 | 55.3  | 9.0  |
| 21UR-21880 | 76.0  | 5.0   | 43.0  | 12.0 | 28.5  | 0.0  |
| 21UR-21890 | 0.0   | 0.0   | 0.0   | 0.0  | 1.0   | 0.0  |
| 21UR-2190  | 12.0  | 4.0   | 10.0  | 1.0  | 4.0   | 0.0  |
| 21UR-21900 | 1.0   | 1.0   | 0.0   | 0.0  | 0.0   | 0.0  |
| 21UR-21910 | 0.0   | 15.0  | 5.0   | 1.0  | 13.0  | 5.0  |
| 21UR-21920 | 5.0   | 26.0  | 7.0   | 1.0  | 12.0  | 0.0  |
| 21UR-21930 | 11.0  | 18.0  | 5.7   | 4.0  | 28.7  | 1.0  |
| 21UR-21940 | 14.0  | 1.0   | 4.0   | 1.0  | 0.0   | 0.0  |
| 21UR-21950 | 0.0   | 6.0   | 6.0   | 0.0  | 0.0   | 0.0  |
| 21UR-21960 | 0.0   | 0.0   | 0.0   | 0.0  | 1.0   | 0.0  |
| 21UR-21970 | 1.0   | 0.0   | 0.0   | 0.0  | 0.0   | 0.0  |
| 21UR-21980 | 74.0  | 54.6  | 90.0  | 58.5 | 45.7  | 10.0 |
| 21UR-21990 | 8.0   | 1.0   | 4.0   | 1.0  | 3.0   | 0.0  |
| 21UR-220   | 0.0   | 1.1   | 0.0   | 0.0  | 0.0   | 0.0  |
| 21UR-2200  | 0.0   | 0.0   | 4.0   | 1.0  | 0.0   | 0.0  |
| 21UR-22000 | 214.5 | 189.0 | 235.0 | 65.0 | 369.7 | 1.0  |
| 21UR-22010 | 0.0   | 0.0   | 0.0   | 0.0  | 0.0   | 0.0  |
| 21UR-22020 | 6.0   | 1.0   | 4.0   | 0.0  | 0.0   | 0.0  |
| 21UR-22030 | 0.0   | 0.0   | 0.0   | 0.0  | 1.0   | 0.0  |
| 21UR-22040 | 0.0   | 1.0   | 2.0   | 0.0  | 1.0   | 1.0  |
| 21UR-22050 | 0.0   | 0.0   | 0.0   | 0.0  | 6.0   | 1.0  |
| 21UR-22060 | 0.0   | 0.0   | 0.0   | 0.0  | 0.0   | 0.0  |
| 21UR-22070 | 101.0 | 18.0  | 122.0 | 50.0 | 70.0  | 2.0  |
| 21UR-22080 | 0.0   | 0.0   | 0.0   | 0.0  | 0.0   | 0.0  |
| 21UR-22090 | 54.5  | 3.0   | 49.0  | 11.0 | 7.0   | 0.0  |
| 21UR-2210  | 0.0   | 0.0   | 1.0   | 1.0  | 0.0   | 0.0  |
| 21UR-22100 | 39.0  | 7.0   | 25.0  | 18.0 | 22.0  | 4.0  |
| 21UR-22110 | 0.0   | 0.0   | 0.0   | 1.0  | 0.0   | 0.0  |
| 21UR-22120 | 0.0   | 0.0   | 0.0   | 0.0  | 1.0   | 0.0  |
| 21UR-22130 | 0.0   | 0.0   | 0.0   | 1.0  | 0.0   | 0.0  |
| 21UR-22140 | 21.5  | 14.0  | 10.0  | 0.0  | 58.5  | 2.0  |
| 21UR-22150 | 0.0   | 3.0   | 1.0   | 1.0  | 2.0   | 0.0  |
| 21UR-22160 | 0.0   | 1.0   | 0.0   | 0.0  | 1.0   | 0.0  |
| 21UR-22170 | 9.0   | 1.0   | 0.0   | 0.0  | 0.0   | 1.0  |
| 21UR-22180 | 0.0   | 0.0   | 0.0   | 0.0  | 0.0   | 0.0  |
| 21UR-22190 | 0.0   | 1.3   | 0.0   | 0.0  | 0.0   | 0.0  |
| 21UR-2220  | 16.0  | 19.0  | 18.0  | 1.0  | 34.0  | 4.0  |
| 21UR-22200 | 6.0   | 1.0   | 1.0   | 0.0  | 1.0   | 0.0  |

|            |         |       |        |        |       |      |
|------------|---------|-------|--------|--------|-------|------|
| 21UR-22210 | 0.0     | 0.0   | 1.0    | 0.0    | 0.0   | 0.0  |
| 21UR-22220 | 6.0     | 0.0   | 0.0    | 0.0    | 0.0   | 0.0  |
| 21UR-22230 | 0.0     | 0.0   | 0.0    | 0.0    | 0.0   | 0.0  |
| 21UR-22240 | 14.0    | 15.0  | 7.0    | 4.0    | 12.0  | 0.0  |
| 21UR-22250 | 0.0     | 0.0   | 1.0    | 1.0    | 0.0   | 0.0  |
| 21UR-22260 | 1.0     | 1.0   | 0.0    | 0.0    | 0.0   | 0.0  |
| 21UR-22270 | 1.0     | 1.0   | 1.0    | 1.0    | 0.0   | 0.0  |
| 21UR-22280 | 0.0     | 0.0   | 0.0    | 0.0    | 0.0   | 0.0  |
| 21UR-22290 | 0.0     | 4.2   | 5.0    | 2.0    | 12.0  | 0.0  |
| 21UR-2230  | 0.0     | 0.0   | 0.0    | 0.0    | 0.0   | 0.0  |
| 21UR-22300 | 16.0    | 1.3   | 15.0   | 1.0    | 1.0   | 0.0  |
| 21UR-22310 | 1.0     | 2.0   | 9.0    | 0.0    | 0.0   | 0.0  |
| 21UR-22320 | 0.0     | 4.0   | 0.0    | 3.0    | 5.0   | 0.0  |
| 21UR-22330 | 26.0    | 11.0  | 39.0   | 10.0   | 7.0   | 2.0  |
| 21UR-22340 | 0.0     | 0.0   | 0.0    | 0.0    | 1.0   | 1.0  |
| 21UR-22350 | 13055.2 | 869.0 | 8172.8 | 3526.0 | 768.0 | 57.0 |
| 21UR-22360 | 14.0    | 8.0   | 16.0   | 12.0   | 22.0  | 2.0  |
| 21UR-22370 | 2.0     | 5.0   | 5.0    | 2.0    | 8.0   | 0.0  |
| 21UR-22380 | 4.0     | 0.0   | 1.0    | 0.0    | 0.0   | 0.0  |
| 21UR-22390 | 0.0     | 1.0   | 0.0    | 0.0    | 0.0   | 0.0  |
| 21UR-2240  | 0.0     | 0.0   | 0.0    | 0.0    | 0.0   | 0.0  |
| 21UR-22400 | 1.0     | 4.0   | 2.0    | 0.0    | 1.0   | 0.0  |
| 21UR-22410 | 0.0     | 0.0   | 0.0    | 0.0    | 0.0   | 0.0  |
| 21UR-22420 | 1.0     | 8.0   | 1.0    | 1.0    | 8.0   | 0.0  |
| 21UR-22430 | 155.0   | 6.0   | 93.0   | 41.0   | 19.0  | 2.0  |
| 21UR-22440 | 4.0     | 2.0   | 4.0    | 0.0    | 11.0  | 3.0  |
| 21UR-22450 | 6.0     | 10.0  | 6.0    | 4.0    | 7.0   | 0.0  |
| 21UR-22460 | 0.0     | 0.0   | 2.0    | 1.0    | 0.0   | 0.0  |
| 21UR-22470 | 0.0     | 0.0   | 0.0    | 0.0    | 0.0   | 0.0  |
| 21UR-22480 | 4.0     | 0.1   | 1.0    | 0.0    | 0.0   | 0.0  |
| 21UR-2250  | 381.0   | 90.0  | 399.0  | 98.0   | 197.0 | 18.0 |
| 21UR-22500 | 3.0     | 10.0  | 1.0    | 0.0    | 2.0   | 1.0  |
| 21UR-22510 | 0.0     | 8.0   | 0.0    | 0.0    | 1.0   | 1.0  |
| 21UR-22520 | 0.0     | 1.0   | 0.0    | 0.0    | 0.0   | 0.0  |
| 21UR-22530 | 1.0     | 1.0   | 1.0    | 0.0    | 4.0   | 0.0  |
| 21UR-22550 | 8.0     | 1.0   | 19.0   | 12.0   | 6.0   | 0.0  |
| 21UR-22560 | 0.0     | 0.0   | 0.0    | 0.0    | 0.0   | 0.0  |
| 21UR-22570 | 0.0     | 1.0   | 0.0    | 0.0    | 0.0   | 2.0  |
| 21UR-22580 | 0.0     | 0.0   | 0.0    | 0.0    | 4.0   | 0.0  |
| 21UR-22590 | 0.0     | 0.0   | 0.0    | 0.0    | 1.0   | 0.0  |
| 21UR-2260  | 19.0    | 15.0  | 10.0   | 1.0    | 2.0   | 0.0  |
| 21UR-22600 | 0.0     | 0.0   | 0.0    | 0.0    | 0.0   | 0.0  |
| 21UR-22610 | 6.0     | 3.0   | 3.0    | 2.0    | 11.0  | 0.0  |
| 21UR-22620 | 1.0     | 0.0   | 0.0    | 0.0    | 0.0   | 0.0  |
| 21UR-22630 | 0.0     | 9.0   | 4.0    | 1.0    | 0.0   | 1.0  |
| 21UR-22640 | 0.0     | 1.0   | 1.0    | 1.0    | 2.0   | 0.0  |
| 21UR-22650 | 0.0     | 0.0   | 1.0    | 0.0    | 0.0   | 0.0  |
| 21UR-22660 | 18.0    | 6.0   | 2.0    | 1.0    | 1.0   | 0.0  |
| 21UR-22670 | 4.0     | 1.0   | 2.0    | 4.0    | 0.0   | 0.0  |
| 21UR-22680 | 815.5   | 44.0  | 528.0  | 156.0  | 12.0  | 4.1  |
| 21UR-22690 | 0.0     | 1.0   | 0.0    | 0.0    | 0.0   | 0.0  |

|            |        |        |        |        |        |       |
|------------|--------|--------|--------|--------|--------|-------|
| 21UR-2270  | 1.0    | 0.0    | 0.0    | 0.0    | 1.0    | 0.0   |
| 21UR-22700 | 20.0   | 17.0   | 14.0   | 14.0   | 11.0   | 3.0   |
| 21UR-22710 | 4.0    | 0.0    | 2.0    | 0.0    | 6.0    | 0.0   |
| 21UR-22720 | 0.0    | 0.0    | 0.0    | 0.0    | 0.0    | 0.0   |
| 21UR-22730 | 12.0   | 14.0   | 2.0    | 0.0    | 46.0   | 1.0   |
| 21UR-22750 | 36.0   | 13.0   | 19.0   | 8.0    | 6.0    | 1.0   |
| 21UR-22760 | 20.0   | 16.0   | 21.0   | 10.0   | 20.0   | 4.0   |
| 21UR-22770 | 0.0    | 0.0    | 1.0    | 0.0    | 0.0    | 0.0   |
| 21UR-22780 | 0.0    | 0.0    | 0.0    | 0.0    | 0.0    | 0.0   |
| 21UR-2280  | 40.0   | 0.0    | 42.0   | 14.0   | 6.0    | 0.0   |
| 21UR-22800 | 1.0    | 1.0    | 6.0    | 0.0    | 4.0    | 0.0   |
| 21UR-22810 | 0.0    | 0.0    | 0.0    | 0.0    | 0.0    | 0.0   |
| 21UR-22820 | 0.0    | 0.0    | 0.0    | 0.0    | 0.0    | 0.0   |
| 21UR-22830 | 1.0    | 7.0    | 2.0    | 0.0    | 5.0    | 4.0   |
| 21UR-22840 | 44.0   | 11.0   | 52.0   | 31.0   | 9.0    | 5.0   |
| 21UR-22850 | 0.0    | 0.0    | 0.0    | 0.0    | 0.0    | 0.0   |
| 21UR-22860 | 33.0   | 27.1   | 25.0   | 6.0    | 14.0   | 1.0   |
| 21UR-22870 | 18.0   | 3.0    | 24.0   | 1.0    | 25.0   | 1.0   |
| 21UR-22880 | 0.0    | 1.0    | 1.0    | 0.0    | 0.0    | 0.0   |
| 21UR-22890 | 9.0    | 1.0    | 6.0    | 4.0    | 1.0    | 0.0   |
| 21UR-2290  | 4.0    | 2.0    | 4.0    | 0.0    | 2.0    | 1.0   |
| 21UR-22900 | 0.0    | 0.0    | 0.0    | 0.0    | 0.0    | 0.0   |
| 21UR-22910 | 7.7    | 2.0    | 1.0    | 1.0    | 0.0    | 0.0   |
| 21UR-22920 | 8.0    | 0.0    | 7.0    | 0.0    | 4.0    | 0.0   |
| 21UR-22930 | 0.0    | 0.0    | 0.0    | 0.0    | 1.0    | 0.0   |
| 21UR-22940 | 0.0    | 0.0    | 0.0    | 0.0    | 0.0    | 0.0   |
| 21UR-22950 | 0.0    | 0.0    | 1.0    | 1.0    | 4.0    | 0.0   |
| 21UR-22960 | 0.0    | 0.0    | 0.0    | 0.0    | 0.0    | 0.0   |
| 21UR-22970 | 1.0    | 7.0    | 4.0    | 4.0    | 0.0    | 1.0   |
| 21UR-22980 | 0.0    | 0.0    | 0.0    | 1.0    | 0.0    | 0.0   |
| 21UR-22990 | 0.0    | 1.0    | 0.0    | 0.0    | 0.0    | 0.0   |
| 21UR-230   | 1.0    | 1.0    | 1.0    | 0.0    | 0.0    | 0.0   |
| 21UR-2300  | 1.0    | 0.0    | 1.0    | 0.0    | 0.0    | 0.0   |
| 21UR-23000 | 80.0   | 24.0   | 54.5   | 20.0   | 15.0   | 0.0   |
| 21UR-23010 | 0.0    | 0.0    | 0.0    | 0.0    | 0.0    | 0.0   |
| 21UR-23020 | 1.0    | 1.0    | 0.0    | 0.0    | 2.0    | 0.0   |
| 21UR-23030 | 1.0    | 0.0    | 0.0    | 0.0    | 0.0    | 0.0   |
| 21UR-23040 | 0.0    | 0.0    | 0.0    | 0.0    | 0.0    | 0.0   |
| 21UR-23050 | 1030.0 | 174.0  | 715.0  | 616.0  | 295.0  | 41.0  |
| 21UR-23060 | 4.0    | 2.0    | 3.0    | 1.0    | 1.0    | 1.0   |
| 21UR-23070 | 5.0    | 10.0   | 12.0   | 4.0    | 15.0   | 1.0   |
| 21UR-23080 | 733.5  | 119.0  | 485.5  | 331.5  | 346.5  | 27.0  |
| 21UR-23090 | 0.0    | 4.0    | 1.0    | 0.0    | 0.0    | 0.0   |
| 21UR-2310  | 0.0    | 0.0    | 1.0    | 0.0    | 0.0    | 0.0   |
| 21UR-23100 | 1.0    | 0.0    | 0.0    | 0.0    | 0.0    | 0.0   |
| 21UR-23110 | 5881.5 | 2567.5 | 4684.8 | 2050.5 | 1712.1 | 263.0 |
| 21UR-23120 | 0.0    | 1.0    | 0.0    | 0.0    | 4.0    | 0.0   |
| 21UR-23130 | 1.0    | 0.0    | 0.0    | 0.0    | 1.0    | 0.0   |
| 21UR-23140 | 1.0    | 0.0    | 0.0    | 0.0    | 0.0    | 0.0   |
| 21UR-23160 | 27.0   | 6.0    | 12.0   | 1.0    | 2.0    | 0.0   |
| 21UR-23170 | 0.0    | 0.0    | 0.0    | 0.0    | 0.0    | 0.0   |

|            |        |       |        |       |       |      |
|------------|--------|-------|--------|-------|-------|------|
| 21UR-23180 | 4.0    | 0.3   | 8.0    | 1.0   | 2.0   | 0.2  |
| 21UR-23190 | 0.0    | 0.0   | 0.0    | 0.0   | 4.0   | 0.0  |
| 21UR-2320  | 44.0   | 18.0  | 13.0   | 6.0   | 10.0  | 2.0  |
| 21UR-23200 | 22.0   | 1.0   | 14.0   | 4.0   | 0.0   | 0.0  |
| 21UR-23210 | 0.0    | 1.0   | 0.0    | 0.0   | 0.0   | 2.0  |
| 21UR-23220 | 68.0   | 7.1   | 49.0   | 6.0   | 30.0  | 4.0  |
| 21UR-23230 | 0.0    | 0.0   | 0.0    | 0.0   | 1.0   | 0.0  |
| 21UR-23240 | 97.0   | 15.0  | 97.0   | 49.0  | 13.0  | 1.0  |
| 21UR-23250 | 228.5  | 45.0  | 227.5  | 79.0  | 14.8  | 20.0 |
| 21UR-23260 | 0.0    | 0.0   | 0.0    | 0.0   | 0.9   | 0.0  |
| 21UR-23270 | 4.0    | 1.0   | 2.0    | 0.0   | 0.0   | 0.0  |
| 21UR-23280 | 8.0    | 3.0   | 10.0   | 4.0   | 0.0   | 1.0  |
| 21UR-23290 | 10.0   | 21.0  | 4.0    | 4.0   | 6.0   | 5.0  |
| 21UR-2330  | 4.0    | 1.0   | 1.0    | 1.0   | 1.0   | 0.0  |
| 21UR-23300 | 1.0    | 0.0   | 0.0    | 0.0   | 0.0   | 0.0  |
| 21UR-23310 | 0.0    | 0.0   | 1.0    | 0.0   | 4.0   | 0.0  |
| 21UR-23320 | 0.0    | 0.0   | 0.0    | 0.0   | 0.0   | 0.0  |
| 21UR-23330 | 0.0    | 0.0   | 0.0    | 0.0   | 0.0   | 0.0  |
| 21UR-23340 | 0.0    | 0.0   | 0.0    | 0.0   | 0.0   | 0.0  |
| 21UR-23350 | 10.0   | 4.0   | 4.0    | 0.0   | 6.0   | 0.0  |
| 21UR-23360 | 12.0   | 3.0   | 11.0   | 0.0   | 1.0   | 0.0  |
| 21UR-23370 | 1.0    | 2.0   | 2.0    | 0.0   | 2.0   | 1.0  |
| 21UR-23390 | 0.0    | 2.0   | 0.0    | 0.0   | 0.0   | 0.0  |
| 21UR-2340  | 8.0    | 1.0   | 1.0    | 0.0   | 4.0   | 0.0  |
| 21UR-23400 | 0.0    | 0.0   | 0.0    | 0.0   | 0.0   | 0.0  |
| 21UR-23410 | 0.0    | 10.0  | 1.0    | 2.0   | 2.0   | 0.0  |
| 21UR-23420 | 0.0    | 0.0   | 0.0    | 0.0   | 0.0   | 0.0  |
| 21UR-23430 | 0.0    | 1.0   | 0.0    | 0.0   | 1.0   | 0.0  |
| 21UR-23440 | 6.0    | 1.0   | 1.0    | 1.0   | 2.0   | 1.0  |
| 21UR-23450 | 0.0    | 1.0   | 0.0    | 0.0   | 0.0   | 0.0  |
| 21UR-23460 | 17.0   | 1.0   | 22.0   | 0.0   | 1.0   | 1.0  |
| 21UR-23470 | 0.0    | 0.0   | 0.0    | 0.0   | 0.0   | 0.0  |
| 21UR-23480 | 0.0    | 2.0   | 0.0    | 4.0   | 16.5  | 1.0  |
| 21UR-23490 | 0.0    | 0.0   | 0.0    | 0.0   | 6.0   | 0.0  |
| 21UR-2350  | 9.0    | 18.0  | 12.0   | 6.0   | 22.0  | 8.0  |
| 21UR-23510 | 11.0   | 10.1  | 8.0    | 4.0   | 4.0   | 0.0  |
| 21UR-23520 | 2.0    | 6.0   | 0.0    | 0.0   | 9.0   | 0.0  |
| 21UR-23530 | 1.0    | 3.0   | 3.0    | 0.0   | 0.0   | 0.0  |
| 21UR-23540 | 14.0   | 4.0   | 8.0    | 0.0   | 3.0   | 0.0  |
| 21UR-23550 | 1.0    | 1.0   | 0.0    | 0.0   | 0.0   | 1.0  |
| 21UR-23560 | 1.0    | 1.0   | 1.0    | 0.0   | 1.0   | 0.0  |
| 21UR-23580 | 0.0    | 0.0   | 0.0    | 0.0   | 4.0   | 0.0  |
| 21UR-23590 | 1.0    | 0.0   | 0.0    | 0.0   | 1.0   | 1.0  |
| 21UR-2360  | 28.0   | 23.0  | 12.0   | 10.0  | 17.0  | 6.0  |
| 21UR-23600 | 1282.0 | 183.0 | 1106.0 | 622.0 | 230.0 | 35.0 |
| 21UR-23610 | 5.0    | 4.0   | 7.0    | 3.0   | 7.0   | 0.0  |
| 21UR-23630 | 12.0   | 5.0   | 10.0   | 6.0   | 14.0  | 1.0  |
| 21UR-23640 | 0.0    | 7.3   | 0.0    | 0.0   | 0.0   | 1.0  |
| 21UR-23650 | 28.0   | 6.0   | 24.0   | 6.0   | 56.0  | 0.0  |
| 21UR-23660 | 4.0    | 1.0   | 14.0   | 0.0   | 0.0   | 1.0  |
| 21UR-23670 | 12.0   | 3.0   | 6.0    | 3.0   | 1.0   | 0.0  |

|            |       |       |       |       |       |      |
|------------|-------|-------|-------|-------|-------|------|
| 21UR-23680 | 13.0  | 1.0   | 0.0   | 3.0   | 13.0  | 0.0  |
| 21UR-23690 | 1.0   | 0.0   | 0.0   | 0.0   | 0.0   | 0.0  |
| 21UR-2370  | 1.0   | 0.0   | 0.0   | 0.0   | 1.0   | 0.0  |
| 21UR-23700 | 0.0   | 0.0   | 0.0   | 0.0   | 0.0   | 0.0  |
| 21UR-23710 | 0.0   | 0.0   | 0.0   | 0.0   | 0.0   | 0.0  |
| 21UR-23720 | 24.0  | 9.0   | 8.0   | 8.0   | 9.0   | 2.0  |
| 21UR-23730 | 0.0   | 1.0   | 1.0   | 0.0   | 4.0   | 0.0  |
| 21UR-23740 | 6.0   | 1.0   | 3.0   | 1.0   | 2.0   | 0.0  |
| 21UR-23750 | 10.0  | 1.0   | 18.0  | 9.0   | 6.0   | 0.0  |
| 21UR-23760 | 4.0   | 2.0   | 0.0   | 0.0   | 1.0   | 1.0  |
| 21UR-23770 | 0.0   | 3.3   | 1.0   | 0.0   | 0.0   | 0.0  |
| 21UR-23780 | 428.0 | 28.0  | 307.0 | 183.0 | 44.0  | 2.0  |
| 21UR-23790 | 1.0   | 6.0   | 1.0   | 0.0   | 0.0   | 1.0  |
| 21UR-2380  | 8.0   | 5.0   | 6.0   | 4.0   | 16.0  | 0.0  |
| 21UR-23800 | 0.0   | 5.0   | 4.0   | 0.0   | 2.0   | 0.0  |
| 21UR-23810 | 1.0   | 1.0   | 6.0   | 0.0   | 0.0   | 0.0  |
| 21UR-23820 | 0.0   | 0.0   | 1.0   | 1.0   | 0.0   | 0.0  |
| 21UR-23830 | 66.0  | 8.0   | 68.0  | 27.0  | 38.5  | 0.0  |
| 21UR-23840 | 18.0  | 2.1   | 4.0   | 0.0   | 4.0   | 1.0  |
| 21UR-23850 | 1.0   | 1.0   | 0.0   | 0.0   | 1.0   | 0.0  |
| 21UR-23860 | 0.0   | 2.0   | 0.0   | 0.0   | 0.0   | 0.0  |
| 21UR-23870 | 0.0   | 0.0   | 0.0   | 0.0   | 1.0   | 0.0  |
| 21UR-23880 | 81.0  | 30.0  | 60.0  | 17.0  | 59.0  | 6.0  |
| 21UR-23890 | 0.0   | 5.0   | 0.0   | 1.0   | 4.0   | 0.0  |
| 21UR-2390  | 0.0   | 0.0   | 0.0   | 0.0   | 0.0   | 0.0  |
| 21UR-23900 | 0.0   | 0.0   | 0.0   | 0.0   | 0.0   | 0.0  |
| 21UR-23910 | 116.0 | 558.0 | 207.0 | 59.0  | 804.0 | 75.0 |
| 21UR-23920 | 48.0  | 6.0   | 52.7  | 10.0  | 3.0   | 0.0  |
| 21UR-23930 | 49.0  | 12.0  | 31.0  | 16.0  | 6.0   | 3.0  |
| 21UR-23940 | 0.0   | 0.1   | 0.0   | 0.0   | 0.0   | 0.0  |
| 21UR-23950 | 4.0   | 0.0   | 4.0   | 1.0   | 0.0   | 0.0  |
| 21UR-23960 | 0.0   | 0.0   | 0.0   | 0.0   | 0.0   | 0.0  |
| 21UR-23970 | 0.0   | 0.0   | 0.0   | 0.0   | 0.0   | 0.0  |
| 21UR-23980 | 0.0   | 0.0   | 0.0   | 0.0   | 0.0   | 0.0  |
| 21UR-23990 | 1.0   | 5.0   | 0.0   | 0.0   | 0.0   | 1.0  |
| 21UR-240   | 30.0  | 2.0   | 26.0  | 10.0  | 6.0   | 2.0  |
| 21UR-24000 | 3.0   | 0.0   | 5.0   | 6.0   | 0.0   | 0.0  |
| 21UR-24020 | 0.0   | 0.0   | 1.0   | 1.0   | 1.0   | 0.0  |
| 21UR-24030 | 0.0   | 0.0   | 0.0   | 0.0   | 1.0   | 0.0  |
| 21UR-24040 | 11.0  | 1.0   | 1.0   | 0.0   | 12.0  | 0.0  |
| 21UR-24050 | 3.0   | 0.0   | 4.0   | 3.0   | 0.0   | 0.0  |
| 21UR-24060 | 0.0   | 0.0   | 0.0   | 0.0   | 0.0   | 0.0  |
| 21UR-24070 | 44.0  | 5.0   | 44.0  | 8.0   | 72.6  | 4.0  |
| 21UR-24080 | 0.0   | 4.0   | 0.0   | 0.0   | 1.0   | 0.0  |
| 21UR-24090 | 193.0 | 26.0  | 155.0 | 41.0  | 12.0  | 6.0  |
| 21UR-2410  | 6.0   | 8.0   | 15.0  | 2.0   | 18.0  | 1.0  |
| 21UR-24100 | 0.0   | 0.0   | 0.0   | 1.0   | 0.0   | 0.0  |
| 21UR-24110 | 0.0   | 0.0   | 0.0   | 0.0   | 0.0   | 0.0  |
| 21UR-24120 | 1.0   | 16.0  | 6.0   | 0.5   | 10.0  | 6.0  |
| 21UR-24130 | 6.0   | 0.0   | 1.0   | 0.0   | 0.0   | 0.0  |
| 21UR-24140 | 6.0   | 0.0   | 0.0   | 0.0   | 0.0   | 1.0  |



|            |       |       |       |      |       |      |
|------------|-------|-------|-------|------|-------|------|
| 21UR-24150 | 0.0   | 0.0   | 0.0   | 0.0  | 0.0   | 0.0  |
| 21UR-24160 | 1.0   | 1.0   | 2.0   | 0.0  | 4.0   | 0.0  |
| 21UR-24170 | 0.0   | 0.0   | 0.0   | 0.0  | 0.0   | 0.0  |
| 21UR-24180 | 8.0   | 0.0   | 8.0   | 1.0  | 4.0   | 1.0  |
| 21UR-2420  | 0.0   | 1.0   | 4.0   | 0.0  | 1.0   | 1.0  |
| 21UR-24200 | 1.0   | 0.0   | 6.0   | 1.0  | 0.0   | 1.0  |
| 21UR-24210 | 0.0   | 1.0   | 0.0   | 0.0  | 0.0   | 0.0  |
| 21UR-24220 | 149.0 | 6.0   | 82.0  | 26.0 | 17.0  | 4.0  |
| 21UR-24230 | 0.0   | 0.0   | 1.0   | 2.0  | 4.0   | 0.0  |
| 21UR-24240 | 0.0   | 1.0   | 0.0   | 0.0  | 0.0   | 0.0  |
| 21UR-24250 | 0.0   | 0.0   | 1.0   | 0.0  | 0.0   | 0.0  |
| 21UR-24260 | 0.0   | 0.0   | 0.0   | 0.0  | 0.0   | 0.0  |
| 21UR-24270 | 0.0   | 0.0   | 0.0   | 0.0  | 0.0   | 0.0  |
| 21UR-24280 | 1.0   | 22.0  | 4.0   | 1.0  | 6.0   | 1.0  |
| 21UR-24290 | 0.0   | 0.0   | 0.0   | 0.0  | 0.0   | 1.0  |
| 21UR-2430  | 99.5  | 193.0 | 146.0 | 68.0 | 119.0 | 24.0 |
| 21UR-24300 | 0.0   | 0.0   | 0.0   | 0.0  | 0.0   | 0.0  |
| 21UR-24310 | 5.0   | 1.0   | 0.0   | 0.0  | 6.0   | 0.0  |
| 21UR-24320 | 1.0   | 0.0   | 4.0   | 1.0  | 0.0   | 0.0  |
| 21UR-24330 | 19.0  | 6.0   | 32.5  | 3.0  | 5.0   | 4.0  |
| 21UR-24340 | 0.0   | 1.0   | 0.0   | 0.0  | 0.0   | 0.0  |
| 21UR-24350 | 55.3  | 97.0  | 58.0  | 31.0 | 47.5  | 17.0 |
| 21UR-24360 | 12.0  | 15.0  | 4.0   | 4.0  | 12.0  | 3.0  |
| 21UR-24370 | 0.0   | 1.0   | 1.0   | 0.0  | 0.0   | 0.0  |
| 21UR-24380 | 18.0  | 7.0   | 16.0  | 4.0  | 8.0   | 0.0  |
| 21UR-24390 | 27.0  | 14.0  | 24.0  | 9.0  | 10.0  | 1.0  |
| 21UR-2440  | 0.0   | 1.0   | 1.0   | 0.0  | 1.0   | 0.0  |
| 21UR-24410 | 0.0   | 0.0   | 0.0   | 0.0  | 4.0   | 0.0  |
| 21UR-24420 | 0.0   | 1.0   | 6.0   | 1.0  | 1.0   | 0.0  |
| 21UR-24430 | 27.0  | 15.0  | 23.0  | 9.0  | 36.0  | 0.0  |
| 21UR-24440 | 10.0  | 0.0   | 17.0  | 6.0  | 8.0   | 0.0  |
| 21UR-24450 | 0.0   | 3.0   | 0.0   | 1.0  | 0.0   | 0.0  |
| 21UR-24460 | 0.0   | 1.0   | 7.0   | 4.0  | 2.0   | 0.0  |
| 21UR-24470 | 0.0   | 4.0   | 0.0   | 0.0  | 0.0   | 0.0  |
| 21UR-24480 | 0.0   | 0.0   | 0.0   | 0.0  | 0.0   | 0.0  |
| 21UR-24490 | 0.0   | 0.0   | 0.0   | 1.0  | 0.0   | 0.0  |
| 21UR-2450  | 6.0   | 0.0   | 1.0   | 0.0  | 0.0   | 0.0  |
| 21UR-24500 | 0.0   | 0.0   | 0.0   | 0.0  | 0.0   | 0.0  |
| 21UR-24510 | 0.0   | 0.0   | 0.0   | 0.0  | 0.0   | 0.0  |
| 21UR-24520 | 0.0   | 2.0   | 1.0   | 0.0  | 0.0   | 0.0  |
| 21UR-24530 | 2.0   | 0.0   | 0.0   | 0.0  | 0.0   | 0.0  |
| 21UR-24550 | 0.0   | 0.0   | 1.0   | 1.0  | 1.0   | 0.0  |
| 21UR-24560 | 0.0   | 0.0   | 0.0   | 0.0  | 1.0   | 0.0  |
| 21UR-24570 | 0.0   | 0.0   | 0.0   | 0.0  | 0.0   | 0.0  |
| 21UR-24580 | 0.0   | 0.0   | 0.0   | 0.0  | 0.0   | 1.0  |
| 21UR-24590 | 1.0   | 20.5  | 10.0  | 2.0  | 8.0   | 2.0  |
| 21UR-2460  | 0.0   | 0.0   | 1.0   | 4.0  | 0.0   | 0.0  |
| 21UR-24600 | 4.0   | 3.0   | 0.0   | 0.0  | 9.0   | 1.0  |
| 21UR-24610 | 10.0  | 0.0   | 8.0   | 0.0  | 0.0   | 0.0  |
| 21UR-24620 | 6.0   | 0.0   | 8.0   | 0.0  | 4.0   | 0.0  |
| 21UR-24630 | 1.0   | 0.0   | 3.0   | 1.0  | 3.0   | 1.0  |

|            |         |        |         |        |       |      |
|------------|---------|--------|---------|--------|-------|------|
| 21UR-24640 | 0.0     | 1.0    | 0.0     | 0.0    | 0.0   | 0.0  |
| 21UR-24650 | 1.0     | 0.0    | 0.0     | 4.0    | 1.0   | 0.0  |
| 21UR-24670 | 2.0     | 0.0    | 4.0     | 0.0    | 0.0   | 0.0  |
| 21UR-24680 | 0.0     | 1.0    | 0.0     | 0.0    | 4.0   | 0.0  |
| 21UR-24690 | 0.0     | 0.0    | 0.0     | 0.0    | 0.0   | 0.0  |
| 21UR-2470  | 72.0    | 31.0   | 78.0    | 17.0   | 26.0  | 1.0  |
| 21UR-24700 | 0.0     | 0.0    | 0.0     | 0.0    | 2.0   | 0.0  |
| 21UR-24710 | 12.0    | 6.0    | 1.0     | 1.0    | 9.0   | 0.0  |
| 21UR-24720 | 0.0     | 4.0    | 0.0     | 0.0    | 4.0   | 0.0  |
| 21UR-24730 | 12.0    | 5.0    | 10.0    | 4.0    | 2.0   | 0.0  |
| 21UR-24740 | 0.0     | 10.0   | 0.0     | 0.0    | 11.0  | 1.0  |
| 21UR-24750 | 361.0   | 75.0   | 267.0   | 152.0  | 97.0  | 6.0  |
| 21UR-24760 | 1.0     | 0.0    | 0.0     | 0.0    | 6.0   | 1.1  |
| 21UR-24770 | 9.0     | 1.0    | 6.0     | 7.0    | 28.0  | 0.0  |
| 21UR-24780 | 0.0     | 1.0    | 4.0     | 0.0    | 6.0   | 0.0  |
| 21UR-24790 | 0.0     | 7.0    | 1.0     | 5.0    | 10.2  | 0.0  |
| 21UR-2480  | 0.0     | 0.0    | 0.0     | 0.0    | 0.0   | 0.0  |
| 21UR-24800 | 0.0     | 0.0    | 0.0     | 0.0    | 0.0   | 0.0  |
| 21UR-24810 | 0.0     | 0.0    | 1.0     | 0.0    | 1.0   | 0.0  |
| 21UR-24820 | 0.0     | 0.0    | 0.0     | 0.0    | 0.0   | 0.0  |
| 21UR-24830 | 1.0     | 1.0    | 1.0     | 0.0    | 0.0   | 0.0  |
| 21UR-24840 | 0.0     | 0.0    | 0.0     | 0.0    | 0.0   | 0.0  |
| 21UR-24850 | 4.0     | 0.0    | 3.0     | 0.0    | 0.0   | 0.0  |
| 21UR-24860 | 0.0     | 1.0    | 0.0     | 0.0    | 0.0   | 0.0  |
| 21UR-24870 | 0.0     | 0.0    | 0.0     | 0.0    | 0.0   | 0.0  |
| 21UR-24880 | 4.0     | 2.0    | 2.0     | 4.0    | 0.0   | 0.0  |
| 21UR-2490  | 0.0     | 0.0    | 0.0     | 0.0    | 0.0   | 0.0  |
| 21UR-24900 | 1.0     | 6.0    | 2.0     | 0.0    | 0.0   | 0.0  |
| 21UR-24910 | 8.0     | 4.0    | 4.0     | 0.0    | 0.0   | 0.0  |
| 21UR-24920 | 1.0     | 0.0    | 1.0     | 0.0    | 0.0   | 0.0  |
| 21UR-24930 | 2.0     | 3.0    | 4.0     | 0.0    | 1.0   | 0.0  |
| 21UR-24940 | 0.0     | 1.0    | 1.0     | 2.0    | 2.0   | 0.0  |
| 21UR-24950 | 1.0     | 0.0    | 0.0     | 0.0    | 0.0   | 0.0  |
| 21UR-24960 | 0.0     | 0.0    | 4.0     | 0.0    | 0.0   | 0.0  |
| 21UR-24970 | 0.0     | 1.0    | 0.0     | 0.0    | 0.0   | 0.0  |
| 21UR-24980 | 442.0   | 102.0  | 273.0   | 246.0  | 94.0  | 7.0  |
| 21UR-24990 | 1.0     | 0.0    | 1.0     | 0.0    | 0.0   | 1.0  |
| 21UR-250   | 1.0     | 4.0    | 0.0     | 0.0    | 2.0   | 1.0  |
| 21UR-2500  | 0.0     | 0.1    | 0.0     | 0.0    | 0.0   | 0.0  |
| 21UR-25000 | 0.0     | 1.0    | 0.0     | 0.0    | 0.0   | 0.0  |
| 21UR-25010 | 0.0     | 0.0    | 0.0     | 0.0    | 0.0   | 0.0  |
| 21UR-25020 | 27318.9 | 1555.4 | 14706.6 | 6264.0 | 961.0 | 85.5 |
| 21UR-25030 | 1.0     | 0.0    | 1.0     | 0.0    | 0.0   | 0.0  |
| 21UR-25050 | 0.0     | 4.0    | 0.0     | 0.0    | 8.0   | 1.0  |
| 21UR-25060 | 0.0     | 0.0    | 0.0     | 0.0    | 0.0   | 0.0  |
| 21UR-25070 | 0.0     | 0.0    | 0.0     | 0.0    | 0.0   | 0.0  |
| 21UR-25080 | 0.0     | 0.0    | 2.0     | 0.0    | 0.0   | 0.0  |
| 21UR-2510  | 5.0     | 5.0    | 6.0     | 1.0    | 1.0   | 0.0  |
| 21UR-25100 | 6.0     | 1.0    | 5.0     | 0.0    | 1.0   | 0.0  |
| 21UR-25110 | 1.0     | 0.0    | 0.0     | 0.0    | 0.0   | 0.0  |
| 21UR-25130 | 4.0     | 4.0    | 6.0     | 0.0    | 1.0   | 2.0  |

|            |        |       |        |       |       |      |
|------------|--------|-------|--------|-------|-------|------|
| 21UR-25140 | 29.0   | 18.0  | 58.7   | 17.0  | 23.0  | 4.0  |
| 21UR-25150 | 1.0    | 0.0   | 0.0    | 0.0   | 0.0   | 0.0  |
| 21UR-25160 | 0.0    | 4.1   | 1.0    | 0.0   | 0.0   | 0.0  |
| 21UR-25170 | 4.0    | 0.0   | 11.0   | 0.0   | 2.0   | 0.0  |
| 21UR-25180 | 6.0    | 1.0   | 1.0    | 0.0   | 2.0   | 0.0  |
| 21UR-25190 | 10.0   | 4.0   | 6.0    | 0.0   | 8.0   | 0.0  |
| 21UR-2520  | 0.0    | 0.0   | 0.0    | 0.0   | 0.0   | 0.0  |
| 21UR-25200 | 6.0    | 8.0   | 10.0   | 2.0   | 5.0   | 1.0  |
| 21UR-25210 | 0.0    | 0.0   | 0.0    | 0.0   | 0.0   | 1.0  |
| 21UR-25220 | 0.0    | 0.0   | 0.0    | 0.0   | 0.0   | 0.0  |
| 21UR-25230 | 38.0   | 31.0  | 32.0   | 38.0  | 28.0  | 6.0  |
| 21UR-25250 | 14.0   | 6.0   | 24.0   | 6.0   | 45.0  | 4.0  |
| 21UR-25260 | 19.0   | 109.5 | 11.0   | 0.0   | 1.0   | 1.0  |
| 21UR-25270 | 14.0   | 0.0   | 15.0   | 5.0   | 9.0   | 0.0  |
| 21UR-25280 | 1.0    | 4.0   | 1.0    | 0.0   | 8.0   | 0.0  |
| 21UR-25290 | 5.0    | 2.0   | 10.0   | 1.0   | 0.0   | 0.0  |
| 21UR-2530  | 4.0    | 1.0   | 8.0    | 0.0   | 1.0   | 0.0  |
| 21UR-25300 | 1.0    | 2.0   | 6.0    | 2.0   | 0.0   | 0.0  |
| 21UR-25310 | 4.0    | 0.0   | 10.0   | 0.0   | 0.5   | 0.1  |
| 21UR-25320 | 293.0  | 106.0 | 235.0  | 66.0  | 98.0  | 6.0  |
| 21UR-25330 | 1.0    | 0.0   | 1.0    | 0.0   | 0.0   | 0.0  |
| 21UR-25340 | 0.0    | 0.0   | 0.0    | 0.0   | 0.0   | 0.0  |
| 21UR-25350 | 0.0    | 14.0  | 4.0    | 4.0   | 12.0  | 3.0  |
| 21UR-25360 | 6.0    | 4.0   | 1.0    | 0.0   | 1.0   | 0.0  |
| 21UR-25370 | 85.0   | 6.0   | 86.0   | 37.0  | 18.0  | 0.0  |
| 21UR-25380 | 1.0    | 4.0   | 0.0    | 0.0   | 1.0   | 4.0  |
| 21UR-25390 | 6.0    | 8.0   | 12.0   | 0.0   | 0.0   | 1.0  |
| 21UR-2540  | 3.0    | 4.0   | 8.0    | 0.0   | 11.5  | 6.0  |
| 21UR-25400 | 5.0    | 2.0   | 1.0    | 0.0   | 1.0   | 1.0  |
| 21UR-25410 | 0.0    | 0.0   | 1.0    | 0.0   | 4.0   | 0.0  |
| 21UR-25420 | 0.0    | 2.0   | 0.0    | 0.0   | 0.0   | 0.0  |
| 21UR-25430 | 1837.0 | 289.0 | 1618.5 | 605.5 | 521.0 | 35.0 |
| 21UR-25440 | 2.0    | 2.0   | 2.0    | 1.0   | 0.0   | 0.0  |
| 21UR-25450 | 68.0   | 20.0  | 60.0   | 16.0  | 18.0  | 1.0  |
| 21UR-25460 | 0.0    | 0.0   | 0.0    | 0.0   | 0.0   | 0.0  |
| 21UR-25470 | 2.0    | 3.0   | 4.0    | 1.0   | 9.0   | 0.0  |
| 21UR-25480 | 9.0    | 2.0   | 4.0    | 1.0   | 1.0   | 0.0  |
| 21UR-25490 | 31.0   | 14.0  | 21.0   | 6.0   | 32.0  | 0.0  |
| 21UR-2550  | 1.0    | 0.0   | 0.0    | 0.0   | 0.0   | 0.0  |
| 21UR-25500 | 0.0    | 0.0   | 0.0    | 0.0   | 1.0   | 0.0  |
| 21UR-25510 | 1.0    | 1.0   | 0.0    | 0.0   | 0.0   | 0.0  |
| 21UR-25530 | 15.0   | 0.0   | 16.0   | 0.0   | 0.0   | 0.0  |
| 21UR-25540 | 1.0    | 7.0   | 0.0    | 0.0   | 7.0   | 1.0  |
| 21UR-25550 | 6.0    | 1.0   | 4.0    | 0.0   | 0.0   | 0.0  |
| 21UR-25560 | 3.0    | 1.0   | 6.0    | 0.0   | 4.0   | 0.0  |
| 21UR-25570 | 35.0   | 6.0   | 27.0   | 8.0   | 10.7  | 0.0  |
| 21UR-25580 | 8.0    | 6.0   | 16.0   | 0.0   | 6.0   | 0.0  |
| 21UR-25590 | 4.0    | 0.0   | 1.0    | 0.0   | 1.0   | 0.0  |
| 21UR-2560  | 0.0    | 1.0   | 0.0    | 0.0   | 1.0   | 0.0  |
| 21UR-25600 | 26.0   | 4.0   | 10.0   | 8.0   | 4.0   | 1.0  |
| 21UR-25620 | 0.0    | 9.0   | 1.0    | 0.0   | 0.0   | 0.0  |

|            |       |       |       |       |       |      |
|------------|-------|-------|-------|-------|-------|------|
| 21UR-25630 | 35.0  | 8.0   | 42.0  | 12.0  | 8.0   | 0.0  |
| 21UR-25640 | 0.0   | 1.0   | 0.0   | 0.0   | 0.0   | 0.0  |
| 21UR-25650 | 0.0   | 1.0   | 0.0   | 0.0   | 1.0   | 0.0  |
| 21UR-25660 | 0.0   | 1.0   | 0.0   | 0.0   | 0.0   | 0.0  |
| 21UR-25670 | 1.0   | 1.0   | 1.0   | 1.0   | 6.0   | 1.0  |
| 21UR-25680 | 14.0  | 8.0   | 4.0   | 0.0   | 20.0  | 1.0  |
| 21UR-25690 | 324.0 | 114.5 | 319.0 | 97.0  | 81.0  | 9.0  |
| 21UR-2570  | 6.0   | 1.0   | 0.0   | 0.0   | 0.0   | 1.0  |
| 21UR-25700 | 0.0   | 0.0   | 0.0   | 0.0   | 0.0   | 0.0  |
| 21UR-25710 | 1.0   | 0.0   | 0.0   | 0.0   | 0.0   | 0.0  |
| 21UR-25720 | 141.7 | 22.0  | 145.0 | 35.0  | 31.0  | 6.0  |
| 21UR-25730 | 1.0   | 4.0   | 1.0   | 0.0   | 10.0  | 1.0  |
| 21UR-25740 | 0.0   | 0.0   | 0.0   | 0.0   | 0.0   | 0.0  |
| 21UR-25750 | 0.0   | 0.0   | 0.0   | 0.0   | 1.0   | 2.0  |
| 21UR-25760 | 8.0   | 2.0   | 1.0   | 0.0   | 8.0   | 0.0  |
| 21UR-25770 | 0.0   | 0.0   | 0.0   | 0.0   | 0.0   | 0.0  |
| 21UR-25780 | 0.0   | 1.0   | 0.0   | 0.0   | 1.0   | 0.0  |
| 21UR-25790 | 0.0   | 0.0   | 1.0   | 1.0   | 0.0   | 0.0  |
| 21UR-2580  | 130.0 | 4.0   | 78.0  | 35.0  | 10.0  | 0.0  |
| 21UR-25800 | 0.0   | 0.0   | 0.0   | 0.0   | 0.0   | 0.0  |
| 21UR-25810 | 0.0   | 0.0   | 0.0   | 0.0   | 0.0   | 0.0  |
| 21UR-25820 | 92.0  | 88.0  | 118.0 | 63.0  | 124.7 | 16.0 |
| 21UR-25830 | 7.0   | 2.0   | 2.0   | 3.0   | 1.0   | 1.0  |
| 21UR-25840 | 17.0  | 2.0   | 23.0  | 10.0  | 20.0  | 0.0  |
| 21UR-25850 | 0.0   | 1.0   | 1.0   | 1.0   | 9.0   | 0.0  |
| 21UR-25860 | 10.0  | 2.0   | 11.0  | 4.0   | 7.0   | 0.0  |
| 21UR-25870 | 0.0   | 0.0   | 0.0   | 0.0   | 0.0   | 0.0  |
| 21UR-25880 | 0.0   | 1.0   | 0.0   | 0.0   | 0.0   | 0.0  |
| 21UR-25890 | 360.8 | 31.0  | 282.0 | 107.0 | 17.0  | 6.0  |
| 21UR-2590  | 4.0   | 6.0   | 0.0   | 4.0   | 1.0   | 1.0  |
| 21UR-25900 | 4.0   | 2.0   | 0.0   | 0.0   | 4.0   | 0.0  |
| 21UR-25910 | 0.0   | 0.0   | 0.0   | 0.0   | 0.0   | 1.0  |
| 21UR-25920 | 8.0   | 1.0   | 4.0   | 1.0   | 0.0   | 0.0  |
| 21UR-25930 | 0.0   | 0.0   | 0.0   | 0.0   | 0.0   | 0.0  |
| 21UR-25940 | 0.0   | 0.0   | 0.0   | 0.0   | 4.0   | 0.0  |
| 21UR-25950 | 0.0   | 0.0   | 0.0   | 0.0   | 0.0   | 0.0  |
| 21UR-25960 | 22.0  | 6.0   | 36.0  | 4.0   | 4.0   | 0.0  |
| 21UR-25970 | 19.0  | 0.0   | 10.0  | 1.0   | 0.0   | 0.0  |
| 21UR-25980 | 1.0   | 0.1   | 0.0   | 0.0   | 0.0   | 0.0  |
| 21UR-25990 | 0.0   | 1.0   | 0.0   | 0.0   | 0.0   | 0.0  |
| 21UR-260   | 0.0   | 0.0   | 0.0   | 0.0   | 0.0   | 0.0  |
| 21UR-2600  | 8.0   | 0.0   | 0.0   | 0.0   | 1.0   | 0.0  |
| 21UR-26000 | 0.0   | 0.0   | 0.0   | 0.0   | 0.0   | 0.0  |
| 21UR-26010 | 0.0   | 0.0   | 0.0   | 0.0   | 0.0   | 0.0  |
| 21UR-26020 | 14.0  | 6.0   | 12.0  | 1.0   | 10.0  | 1.0  |
| 21UR-26030 | 0.0   | 0.0   | 0.0   | 0.0   | 0.0   | 0.0  |
| 21UR-26040 | 1.0   | 0.0   | 0.0   | 0.0   | 0.0   | 1.0  |
| 21UR-26050 | 0.0   | 0.0   | 0.0   | 0.0   | 0.0   | 0.0  |
| 21UR-26060 | 1.0   | 0.0   | 0.0   | 0.0   | 0.0   | 0.0  |
| 21UR-26070 | 0.0   | 0.0   | 0.0   | 0.0   | 0.0   | 0.0  |
| 21UR-26080 | 157.0 | 34.0  | 75.0  | 42.0  | 38.0  | 1.0  |

|            |       |      |       |       |      |     |
|------------|-------|------|-------|-------|------|-----|
| 21UR-26090 | 0.0   | 3.0  | 1.0   | 0.0   | 3.0  | 0.0 |
| 21UR-2610  | 0.0   | 0.0  | 0.0   | 0.0   | 0.0  | 0.0 |
| 21UR-26100 | 0.0   | 0.0  | 0.0   | 0.0   | 0.0  | 0.0 |
| 21UR-26110 | 0.0   | 0.0  | 0.0   | 0.0   | 0.0  | 0.0 |
| 21UR-26120 | 0.0   | 0.0  | 0.0   | 0.0   | 3.0  | 0.0 |
| 21UR-26130 | 0.0   | 0.0  | 0.0   | 0.0   | 0.0  | 0.0 |
| 21UR-26140 | 0.0   | 0.0  | 0.0   | 0.0   | 0.0  | 0.0 |
| 21UR-26150 | 0.0   | 0.0  | 0.0   | 0.0   | 0.0  | 0.0 |
| 21UR-26160 | 0.0   | 3.0  | 0.0   | 0.0   | 4.0  | 0.0 |
| 21UR-26170 | 1.0   | 0.0  | 0.0   | 0.0   | 1.0  | 0.0 |
| 21UR-26180 | 4.0   | 0.0  | 1.0   | 0.0   | 2.0  | 1.0 |
| 21UR-26190 | 0.0   | 2.0  | 0.0   | 0.0   | 1.0  | 0.0 |
| 21UR-2620  | 4.0   | 2.0  | 1.0   | 0.0   | 0.0  | 0.0 |
| 21UR-26200 | 0.0   | 0.0  | 0.0   | 0.0   | 1.0  | 0.0 |
| 21UR-26210 | 82.0  | 17.0 | 76.0  | 50.0  | 16.0 | 0.0 |
| 21UR-26220 | 0.0   | 0.0  | 0.0   | 0.0   | 0.0  | 0.0 |
| 21UR-26230 | 9.0   | 0.0  | 17.0  | 3.0   | 0.0  | 1.0 |
| 21UR-26240 | 0.0   | 0.0  | 0.0   | 0.0   | 0.0  | 0.0 |
| 21UR-26250 | 1.0   | 3.0  | 4.0   | 0.0   | 9.0  | 1.0 |
| 21UR-26260 | 1.0   | 0.0  | 0.0   | 0.0   | 0.0  | 0.0 |
| 21UR-26270 | 0.0   | 0.0  | 0.0   | 0.0   | 1.0  | 1.0 |
| 21UR-26280 | 8.0   | 3.0  | 1.0   | 0.0   | 0.0  | 0.0 |
| 21UR-26290 | 11.0  | 23.0 | 15.0  | 8.0   | 22.0 | 1.0 |
| 21UR-2630  | 0.0   | 0.0  | 0.0   | 0.0   | 0.0  | 0.0 |
| 21UR-26300 | 0.0   | 2.0  | 0.0   | 0.0   | 4.0  | 1.0 |
| 21UR-26310 | 0.0   | 0.0  | 0.0   | 0.0   | 0.0  | 0.0 |
| 21UR-26320 | 0.0   | 1.0  | 0.0   | 0.0   | 0.0  | 0.0 |
| 21UR-26330 | 1.0   | 0.0  | 0.0   | 0.0   | 0.0  | 0.0 |
| 21UR-26340 | 5.0   | 2.0  | 12.0  | 1.0   | 8.0  | 1.0 |
| 21UR-26350 | 1.0   | 1.0  | 1.0   | 0.0   | 0.0  | 0.0 |
| 21UR-26360 | 0.0   | 2.0  | 0.0   | 0.0   | 0.0  | 0.0 |
| 21UR-26370 | 9.0   | 25.0 | 1.0   | 4.0   | 34.5 | 2.0 |
| 21UR-26380 | 0.0   | 0.0  | 0.0   | 0.0   | 1.0  | 0.0 |
| 21UR-26390 | 12.0  | 35.3 | 12.0  | 1.0   | 24.7 | 0.0 |
| 21UR-2640  | 0.0   | 0.0  | 0.0   | 0.0   | 0.0  | 0.0 |
| 21UR-26400 | 0.0   | 0.0  | 0.0   | 1.0   | 0.0  | 0.0 |
| 21UR-26410 | 1.0   | 4.0  | 0.0   | 0.0   | 4.0  | 0.0 |
| 21UR-26420 | 4.0   | 0.0  | 0.0   | 0.0   | 0.0  | 0.0 |
| 21UR-26430 | 1.0   | 5.0  | 1.0   | 0.0   | 15.0 | 0.0 |
| 21UR-26440 | 209.5 | 31.0 | 171.0 | 122.0 | 49.5 | 4.0 |
| 21UR-26450 | 0.0   | 1.0  | 0.0   | 0.0   | 0.0  | 0.0 |
| 21UR-26460 | 0.0   | 3.0  | 0.0   | 0.0   | 0.0  | 0.0 |
| 21UR-26470 | 6.0   | 1.0  | 5.0   | 2.0   | 0.0  | 0.0 |
| 21UR-26480 | 1.0   | 0.0  | 0.0   | 0.0   | 4.0  | 0.0 |
| 21UR-26490 | 2.0   | 1.0  | 3.0   | 0.0   | 0.0  | 0.0 |
| 21UR-2650  | 14.0  | 1.0  | 21.0  | 12.0  | 17.0 | 1.0 |
| 21UR-26500 | 5.0   | 8.0  | 13.0  | 1.0   | 11.0 | 0.0 |
| 21UR-26510 | 1.0   | 0.0  | 1.0   | 0.0   | 0.0  | 0.0 |
| 21UR-26520 | 0.0   | 0.0  | 0.0   | 0.0   | 0.0  | 0.0 |
| 21UR-26530 | 0.0   | 0.0  | 0.0   | 0.0   | 0.0  | 0.0 |
| 21UR-26540 | 3.0   | 0.0  | 4.0   | 0.0   | 4.0  | 0.0 |

|            |       |       |       |       |       |      |
|------------|-------|-------|-------|-------|-------|------|
| 21UR-26550 | 0.0   | 0.0   | 0.0   | 1.0   | 0.0   | 0.0  |
| 21UR-26560 | 10.0  | 2.0   | 20.0  | 1.0   | 4.0   | 0.0  |
| 21UR-26570 | 92.0  | 18.0  | 104.0 | 28.0  | 24.0  | 4.0  |
| 21UR-26580 | 0.0   | 0.0   | 0.0   | 0.0   | 0.0   | 0.0  |
| 21UR-26590 | 1.0   | 0.0   | 6.0   | 0.0   | 4.0   | 0.0  |
| 21UR-2660  | 9.0   | 3.0   | 16.0  | 1.0   | 1.0   | 1.0  |
| 21UR-26600 | 1.0   | 4.0   | 23.0  | 9.0   | 11.0  | 0.0  |
| 21UR-26610 | 0.0   | 0.0   | 4.0   | 0.0   | 6.0   | 0.0  |
| 21UR-26620 | 6.0   | 4.0   | 12.0  | 4.0   | 3.5   | 0.0  |
| 21UR-26640 | 4.0   | 0.0   | 2.0   | 0.0   | 1.0   | 0.0  |
| 21UR-26650 | 0.0   | 0.0   | 0.0   | 0.0   | 0.0   | 0.0  |
| 21UR-26660 | 1.0   | 0.0   | 0.0   | 1.0   | 1.0   | 1.0  |
| 21UR-26670 | 1.0   | 0.0   | 0.0   | 0.0   | 0.0   | 0.0  |
| 21UR-26680 | 0.0   | 0.0   | 0.0   | 0.0   | 0.0   | 0.0  |
| 21UR-26690 | 16.0  | 0.0   | 6.0   | 8.0   | 12.0  | 4.0  |
| 21UR-2670  | 1.0   | 0.0   | 0.0   | 0.0   | 1.1   | 0.0  |
| 21UR-26700 | 1.0   | 0.0   | 4.0   | 0.0   | 1.0   | 0.0  |
| 21UR-26710 | 1.0   | 0.1   | 1.0   | 0.0   | 0.0   | 0.0  |
| 21UR-26720 | 16.0  | 5.0   | 33.0  | 14.0  | 48.0  | 0.0  |
| 21UR-26730 | 0.0   | 0.0   | 1.0   | 0.0   | 0.0   | 0.0  |
| 21UR-26740 | 27.0  | 4.0   | 28.0  | 4.0   | 1.0   | 1.0  |
| 21UR-26750 | 8.0   | 15.0  | 6.0   | 1.0   | 21.5  | 3.0  |
| 21UR-26760 | 4.0   | 0.0   | 0.0   | 0.0   | 1.0   | 0.0  |
| 21UR-26770 | 0.0   | 2.0   | 0.0   | 0.0   | 1.0   | 0.0  |
| 21UR-26780 | 10.0  | 0.0   | 12.0  | 4.0   | 5.0   | 0.0  |
| 21UR-26790 | 0.0   | 0.0   | 4.0   | 1.0   | 4.0   | 0.0  |
| 21UR-2680  | 1.0   | 0.0   | 0.0   | 0.0   | 1.0   | 0.0  |
| 21UR-26800 | 0.0   | 0.0   | 4.0   | 0.0   | 1.0   | 0.0  |
| 21UR-26810 | 22.0  | 4.5   | 14.0  | 4.0   | 4.0   | 0.0  |
| 21UR-26820 | 10.0  | 4.0   | 20.0  | 10.0  | 14.0  | 1.0  |
| 21UR-26830 | 367.0 | 57.0  | 290.0 | 101.0 | 70.0  | 5.0  |
| 21UR-26840 | 11.0  | 6.0   | 9.0   | 7.5   | 10.0  | 1.0  |
| 21UR-26850 | 4.0   | 6.0   | 0.0   | 0.0   | 16.0  | 2.0  |
| 21UR-26860 | 690.2 | 304.0 | 579.5 | 221.5 | 115.5 | 40.0 |
| 21UR-26870 | 1.0   | 0.0   | 0.0   | 0.0   | 0.0   | 0.0  |
| 21UR-26880 | 6.0   | 0.0   | 1.0   | 1.0   | 1.0   | 0.0  |
| 21UR-26890 | 13.5  | 26.0  | 20.0  | 13.0  | 12.5  | 6.5  |
| 21UR-2690  | 6.0   | 0.0   | 6.0   | 0.0   | 9.0   | 0.0  |
| 21UR-26900 | 0.0   | 2.0   | 0.0   | 0.0   | 1.0   | 1.0  |
| 21UR-26910 | 0.0   | 1.8   | 0.0   | 0.0   | 0.0   | 0.4  |
| 21UR-26920 | 0.0   | 0.0   | 0.0   | 0.0   | 0.0   | 0.0  |
| 21UR-26930 | 0.0   | 1.0   | 0.0   | 0.0   | 4.0   | 0.0  |
| 21UR-26940 | 0.0   | 2.0   | 0.0   | 0.0   | 1.0   | 0.0  |
| 21UR-26950 | 0.0   | 3.0   | 9.0   | 4.0   | 10.0  | 0.0  |
| 21UR-26970 | 0.0   | 0.0   | 0.0   | 0.0   | 0.0   | 0.0  |
| 21UR-26980 | 10.0  | 13.0  | 6.0   | 0.0   | 9.0   | 0.0  |
| 21UR-26990 | 0.0   | 4.0   | 0.0   | 0.0   | 1.0   | 0.0  |
| 21UR-270   | 5.0   | 0.0   | 1.0   | 0.0   | 0.0   | 0.0  |
| 21UR-2700  | 0.0   | 0.0   | 0.0   | 0.0   | 1.0   | 0.0  |
| 21UR-27000 | 0.0   | 0.0   | 0.0   | 0.0   | 1.0   | 0.0  |
| 21UR-27020 | 0.0   | 1.0   | 0.0   | 1.0   | 0.0   | 0.0  |

|            |        |       |        |        |       |      |
|------------|--------|-------|--------|--------|-------|------|
| 21UR-27030 | 0.0    | 0.0   | 0.0    | 0.0    | 1.0   | 0.0  |
| 21UR-27040 | 0.0    | 1.0   | 0.0    | 0.0    | 0.0   | 0.0  |
| 21UR-27050 | 0.0    | 0.0   | 0.0    | 0.0    | 0.0   | 0.0  |
| 21UR-27060 | 38.0   | 42.0  | 58.0   | 19.5   | 52.0  | 0.0  |
| 21UR-27070 | 0.0    | 0.0   | 0.0    | 0.0    | 0.0   | 0.0  |
| 21UR-27080 | 31.0   | 4.0   | 41.0   | 7.0    | 6.0   | 0.0  |
| 21UR-27090 | 0.0    | 1.0   | 0.0    | 0.0    | 1.0   | 0.0  |
| 21UR-2710  | 0.0    | 0.0   | 0.0    | 0.0    | 1.0   | 0.0  |
| 21UR-27100 | 910.7  | 282.0 | 986.3  | 431.0  | 207.7 | 27.0 |
| 21UR-27110 | 0.0    | 0.0   | 1.0    | 0.0    | 1.0   | 0.0  |
| 21UR-27120 | 0.0    | 0.0   | 0.0    | 0.0    | 0.0   | 0.0  |
| 21UR-27130 | 1.0    | 0.0   | 2.0    | 0.0    | 0.0   | 0.0  |
| 21UR-27140 | 178.0  | 31.0  | 121.0  | 89.0   | 59.0  | 5.0  |
| 21UR-27150 | 1.0    | 3.0   | 4.0    | 0.0    | 5.0   | 1.0  |
| 21UR-27160 | 23.0   | 48.0  | 23.0   | 17.0   | 54.0  | 2.0  |
| 21UR-27170 | 1.0    | 1.0   | 0.0    | 0.0    | 0.0   | 0.0  |
| 21UR-27180 | 8.0    | 11.0  | 7.0    | 3.0    | 14.0  | 5.0  |
| 21UR-27190 | 15.0   | 2.0   | 10.0   | 4.0    | 8.0   | 0.0  |
| 21UR-2720  | 0.0    | 0.0   | 1.0    | 0.0    | 1.0   | 0.0  |
| 21UR-27200 | 8.0    | 53.0  | 10.0   | 1.0    | 29.0  | 15.0 |
| 21UR-27210 | 7369.3 | 653.7 | 5520.2 | 3559.4 | 578.8 | 78.0 |
| 21UR-27220 | 0.0    | 1.0   | 0.0    | 0.0    | 0.0   | 0.0  |
| 21UR-27230 | 1.0    | 7.0   | 2.0    | 0.0    | 3.0   | 0.0  |
| 21UR-27240 | 1.0    | 0.0   | 1.0    | 4.0    | 1.0   | 0.0  |
| 21UR-27250 | 23.0   | 4.0   | 12.0   | 2.0    | 0.0   | 0.0  |
| 21UR-27260 | 0.0    | 0.0   | 0.0    | 0.0    | 1.0   | 0.0  |
| 21UR-27270 | 0.0    | 0.0   | 0.0    | 0.0    | 0.0   | 0.0  |
| 21UR-27280 | 23.0   | 3.0   | 16.0   | 9.0    | 4.0   | 1.0  |
| 21UR-27290 | 10.0   | 1.0   | 1.0    | 2.0    | 0.0   | 0.0  |
| 21UR-2730  | 0.0    | 0.0   | 0.0    | 0.0    | 0.0   | 0.1  |
| 21UR-27300 | 0.0    | 0.0   | 0.0    | 0.0    | 0.0   | 0.0  |
| 21UR-27310 | 0.0    | 0.0   | 0.0    | 1.0    | 0.0   | 0.0  |
| 21UR-27320 | 4.0    | 1.0   | 3.0    | 0.0    | 4.0   | 0.0  |
| 21UR-27330 | 0.0    | 0.0   | 0.0    | 0.0    | 0.0   | 0.0  |
| 21UR-27340 | 0.0    | 6.0   | 4.0    | 1.0    | 8.0   | 2.0  |
| 21UR-27350 | 0.0    | 0.0   | 0.0    | 0.0    | 0.0   | 0.0  |
| 21UR-27360 | 1.0    | 4.0   | 6.0    | 4.0    | 2.0   | 0.0  |
| 21UR-27370 | 0.0    | 0.0   | 0.0    | 0.0    | 0.0   | 0.0  |
| 21UR-27380 | 0.0    | 0.0   | 0.0    | 0.0    | 1.0   | 0.0  |
| 21UR-27390 | 1.0    | 0.0   | 0.0    | 0.0    | 0.0   | 0.0  |
| 21UR-2740  | 0.0    | 0.0   | 6.0    | 0.0    | 0.0   | 0.0  |
| 21UR-27400 | 13.0   | 26.0  | 8.0    | 1.0    | 10.0  | 0.0  |
| 21UR-27410 | 0.0    | 2.0   | 0.0    | 0.0    | 1.0   | 0.0  |
| 21UR-27420 | 374.0  | 50.0  | 216.0  | 72.0   | 57.5  | 6.0  |
| 21UR-27430 | 68.5   | 7.0   | 27.0   | 19.0   | 10.0  | 1.0  |
| 21UR-27440 | 6.0    | 0.0   | 0.0    | 1.0    | 0.0   | 0.0  |
| 21UR-27450 | 0.0    | 0.0   | 1.0    | 0.0    | 0.0   | 0.0  |
| 21UR-27460 | 0.0    | 0.0   | 2.0    | 1.0    | 4.2   | 0.0  |
| 21UR-27470 | 0.0    | 0.0   | 2.0    | 0.0    | 1.0   | 0.0  |
| 21UR-27480 | 2.0    | 6.0   | 0.0    | 0.0    | 7.5   | 0.0  |
| 21UR-27490 | 46.0   | 1.0   | 26.0   | 11.0   | 7.0   | 1.0  |

|            |       |       |       |       |       |      |
|------------|-------|-------|-------|-------|-------|------|
| 21UR-2750  | 10.0  | 7.0   | 4.0   | 2.0   | 2.0   | 0.0  |
| 21UR-27500 | 0.0   | 0.0   | 0.0   | 0.0   | 0.0   | 0.0  |
| 21UR-27510 | 0.0   | 0.0   | 1.0   | 0.0   | 1.0   | 0.0  |
| 21UR-27520 | 17.0  | 9.0   | 16.0  | 7.5   | 13.0  | 1.0  |
| 21UR-27530 | 0.0   | 4.0   | 1.0   | 1.0   | 0.0   | 1.0  |
| 21UR-27540 | 6.0   | 1.0   | 8.0   | 1.0   | 8.0   | 1.0  |
| 21UR-27550 | 1.0   | 0.0   | 1.0   | 0.0   | 1.0   | 0.0  |
| 21UR-27560 | 0.0   | 0.0   | 0.0   | 0.0   | 0.0   | 0.0  |
| 21UR-27570 | 0.0   | 0.2   | 1.0   | 0.0   | 1.0   | 0.1  |
| 21UR-27580 | 11.0  | 6.1   | 4.0   | 1.0   | 4.0   | 1.0  |
| 21UR-27590 | 1.0   | 5.0   | 0.0   | 0.0   | 4.0   | 0.0  |
| 21UR-2760  | 3.0   | 0.0   | 4.0   | 0.0   | 0.0   | 0.0  |
| 21UR-27600 | 2.0   | 0.0   | 0.0   | 0.0   | 1.0   | 0.0  |
| 21UR-27610 | 138.0 | 142.0 | 177.0 | 74.0  | 203.5 | 16.0 |
| 21UR-27620 | 4.0   | 0.0   | 0.0   | 0.0   | 0.0   | 0.0  |
| 21UR-27630 | 0.0   | 0.0   | 0.0   | 0.0   | 0.0   | 0.0  |
| 21UR-27640 | 0.0   | 0.0   | 0.0   | 1.0   | 1.0   | 0.0  |
| 21UR-27650 | 1.0   | 0.0   | 6.0   | 0.0   | 0.0   | 0.0  |
| 21UR-27660 | 0.0   | 0.0   | 0.0   | 0.0   | 1.0   | 0.0  |
| 21UR-27670 | 6.0   | 4.0   | 2.0   | 0.0   | 1.0   | 0.0  |
| 21UR-27690 | 0.0   | 8.0   | 0.0   | 0.0   | 4.0   | 1.0  |
| 21UR-2770  | 0.0   | 0.0   | 0.0   | 0.0   | 0.0   | 0.0  |
| 21UR-27700 | 0.0   | 1.0   | 0.0   | 0.0   | 0.0   | 0.0  |
| 21UR-27710 | 0.0   | 1.0   | 0.0   | 0.0   | 0.0   | 0.0  |
| 21UR-27720 | 0.0   | 1.0   | 8.0   | 0.0   | 0.0   | 0.0  |
| 21UR-27730 | 2.0   | 1.0   | 0.0   | 0.0   | 3.0   | 0.0  |
| 21UR-27740 | 22.0  | 12.0  | 16.0  | 11.0  | 14.0  | 1.0  |
| 21UR-27750 | 0.0   | 0.0   | 0.0   | 0.0   | 0.0   | 0.0  |
| 21UR-27760 | 0.0   | 4.0   | 0.0   | 0.0   | 0.0   | 0.0  |
| 21UR-27770 | 3.0   | 0.0   | 4.0   | 0.0   | 7.0   | 0.0  |
| 21UR-27780 | 1.0   | 0.0   | 0.0   | 0.0   | 0.0   | 0.0  |
| 21UR-27790 | 12.0  | 34.0  | 19.0  | 3.0   | 39.3  | 9.0  |
| 21UR-2780  | 0.0   | 0.0   | 0.0   | 0.0   | 0.0   | 0.0  |
| 21UR-27800 | 11.7  | 14.0  | 10.0  | 1.0   | 7.0   | 4.0  |
| 21UR-27810 | 10.0  | 0.0   | 8.0   | 0.0   | 1.0   | 0.0  |
| 21UR-27820 | 0.0   | 0.0   | 0.0   | 0.0   | 0.0   | 0.0  |
| 21UR-27840 | 0.0   | 0.0   | 3.0   | 0.0   | 0.0   | 0.0  |
| 21UR-27850 | 0.0   | 1.0   | 4.0   | 0.0   | 2.0   | 0.0  |
| 21UR-27860 | 4.0   | 1.0   | 1.0   | 0.0   | 3.0   | 0.0  |
| 21UR-27870 | 0.0   | 0.0   | 0.0   | 0.0   | 0.0   | 0.0  |
| 21UR-27890 | 311.0 | 16.0  | 273.0 | 126.0 | 38.0  | 2.0  |
| 21UR-2790  | 64.0  | 18.5  | 43.0  | 22.3  | 11.0  | 1.0  |
| 21UR-27900 | 27.0  | 11.0  | 32.0  | 4.0   | 9.0   | 2.0  |
| 21UR-27910 | 0.0   | 0.0   | 0.0   | 0.0   | 0.0   | 0.0  |
| 21UR-27920 | 0.0   | 1.0   | 0.0   | 0.0   | 0.0   | 0.0  |
| 21UR-27930 | 1.0   | 0.0   | 4.0   | 0.0   | 0.0   | 0.0  |
| 21UR-27940 | 1.0   | 0.0   | 1.0   | 0.0   | 0.0   | 0.0  |
| 21UR-27950 | 0.0   | 1.0   | 0.0   | 0.0   | 0.5   | 0.0  |
| 21UR-27960 | 5.0   | 6.0   | 0.0   | 0.0   | 5.0   | 0.0  |
| 21UR-27970 | 0.0   | 1.0   | 0.0   | 1.0   | 1.0   | 0.0  |
| 21UR-27980 | 4.0   | 0.0   | 0.0   | 1.0   | 1.0   | 0.0  |



|            |        |       |       |       |       |      |
|------------|--------|-------|-------|-------|-------|------|
| 21UR-27990 | 328.8  | 81.0  | 287.0 | 164.0 | 62.0  | 17.0 |
| 21UR-280   | 1.0    | 6.0   | 0.0   | 0.0   | 3.0   | 0.0  |
| 21UR-2800  | 0.0    | 0.0   | 0.0   | 0.0   | 0.0   | 0.0  |
| 21UR-28000 | 0.0    | 1.0   | 0.0   | 1.0   | 0.0   | 0.0  |
| 21UR-28010 | 0.0    | 0.0   | 0.0   | 0.0   | 0.0   | 0.0  |
| 21UR-28020 | 0.0    | 0.0   | 0.0   | 0.0   | 0.0   | 0.0  |
| 21UR-28030 | 0.0    | 1.0   | 0.0   | 0.0   | 0.0   | 0.0  |
| 21UR-28040 | 6.0    | 0.0   | 1.0   | 0.0   | 0.0   | 0.0  |
| 21UR-28050 | 0.0    | 1.0   | 0.0   | 0.0   | 1.0   | 0.0  |
| 21UR-28060 | 5.0    | 0.0   | 2.0   | 0.0   | 2.0   | 0.0  |
| 21UR-28070 | 0.0    | 0.0   | 0.0   | 0.0   | 0.0   | 0.0  |
| 21UR-28080 | 0.0    | 0.0   | 1.0   | 0.0   | 0.0   | 0.1  |
| 21UR-28090 | 4.0    | 18.0  | 7.0   | 0.0   | 0.0   | 6.0  |
| 21UR-2810  | 0.0    | 0.0   | 0.0   | 0.0   | 0.0   | 0.0  |
| 21UR-28100 | 3.0    | 0.0   | 1.0   | 0.0   | 5.0   | 1.0  |
| 21UR-28110 | 0.0    | 0.0   | 0.0   | 0.0   | 0.0   | 0.0  |
| 21UR-28120 | 0.0    | 1.0   | 4.0   | 1.0   | 1.0   | 1.0  |
| 21UR-28130 | 4.0    | 0.0   | 1.0   | 0.0   | 0.0   | 0.0  |
| 21UR-28140 | 0.0    | 5.0   | 0.0   | 0.0   | 4.0   | 1.0  |
| 21UR-28150 | 0.0    | 0.0   | 0.0   | 0.0   | 0.0   | 0.0  |
| 21UR-28160 | 1080.0 | 365.1 | 683.0 | 667.0 | 409.0 | 91.0 |
| 21UR-28170 | 0.0    | 0.0   | 0.0   | 0.0   | 0.0   | 0.0  |
| 21UR-28180 | 34.0   | 10.3  | 18.0  | 8.0   | 4.0   | 0.0  |
| 21UR-28190 | 21.0   | 5.0   | 18.0  | 8.0   | 29.2  | 0.0  |
| 21UR-2820  | 0.0    | 1.0   | 1.0   | 0.0   | 0.0   | 0.0  |
| 21UR-28200 | 0.0    | 0.0   | 0.0   | 0.0   | 0.0   | 0.0  |
| 21UR-28220 | 40.0   | 2.0   | 21.0  | 9.0   | 1.0   | 0.1  |
| 21UR-28230 | 12.0   | 0.0   | 11.0  | 5.0   | 5.0   | 0.0  |
| 21UR-28240 | 1.0    | 0.0   | 1.0   | 1.0   | 0.0   | 1.0  |
| 21UR-28250 | 0.0    | 0.0   | 0.0   | 0.0   | 1.0   | 0.0  |
| 21UR-28260 | 5.0    | 35.0  | 8.0   | 10.0  | 49.0  | 3.0  |
| 21UR-28270 | 22.0   | 68.0  | 33.0  | 6.0   | 41.0  | 1.0  |
| 21UR-28280 | 1.0    | 0.0   | 1.0   | 0.0   | 1.0   | 0.0  |
| 21UR-28290 | 62.0   | 7.0   | 68.0  | 12.0  | 14.5  | 0.0  |
| 21UR-2830  | 0.0    | 0.0   | 0.0   | 0.0   | 1.0   | 4.0  |
| 21UR-28300 | 8.0    | 0.0   | 4.0   | 6.0   | 3.0   | 0.0  |
| 21UR-28310 | 14.0   | 0.0   | 8.0   | 3.0   | 4.0   | 0.0  |
| 21UR-28320 | 0.0    | 0.1   | 0.0   | 0.0   | 0.0   | 0.0  |
| 21UR-28330 | 0.0    | 0.0   | 0.0   | 0.0   | 0.0   | 0.0  |
| 21UR-28340 | 642.0  | 151.0 | 563.7 | 448.0 | 118.0 | 19.0 |
| 21UR-28350 | 1.0    | 0.0   | 1.0   | 0.0   | 0.0   | 0.0  |
| 21UR-28360 | 0.0    | 0.0   | 0.0   | 0.0   | 0.0   | 0.0  |
| 21UR-28370 | 0.0    | 4.0   | 0.0   | 0.0   | 0.0   | 0.0  |
| 21UR-28380 | 1.0    | 1.0   | 1.0   | 0.0   | 1.0   | 0.0  |
| 21UR-28390 | 0.0    | 0.0   | 0.0   | 0.0   | 0.0   | 0.0  |
| 21UR-2840  | 0.0    | 0.0   | 0.0   | 0.0   | 1.0   | 0.0  |
| 21UR-28400 | 0.0    | 0.0   | 0.0   | 0.0   | 0.0   | 0.0  |
| 21UR-28410 | 0.0    | 0.0   | 0.0   | 0.0   | 0.0   | 0.0  |
| 21UR-28420 | 0.0    | 0.0   | 0.0   | 0.0   | 0.0   | 0.0  |
| 21UR-28430 | 20.0   | 13.0  | 22.0  | 17.0  | 10.0  | 0.0  |
| 21UR-28450 | 50.0   | 8.0   | 18.0  | 10.0  | 17.0  | 0.0  |

|            |       |       |       |       |       |      |
|------------|-------|-------|-------|-------|-------|------|
| 21UR-28460 | 0.0   | 1.0   | 0.0   | 0.0   | 1.0   | 0.0  |
| 21UR-28470 | 0.0   | 0.0   | 0.0   | 0.0   | 0.0   | 0.0  |
| 21UR-28480 | 2.0   | 3.0   | 1.0   | 0.0   | 1.0   | 0.0  |
| 21UR-28490 | 0.0   | 13.0  | 0.0   | 0.0   | 6.5   | 2.0  |
| 21UR-2850  | 35.0  | 13.0  | 26.0  | 16.0  | 1.0   | 0.0  |
| 21UR-28500 | 0.0   | 0.0   | 0.0   | 1.0   | 0.0   | 0.0  |
| 21UR-28510 | 0.0   | 0.0   | 0.0   | 0.0   | 0.0   | 0.0  |
| 21UR-28520 | 0.0   | 0.0   | 0.0   | 0.0   | 0.0   | 0.0  |
| 21UR-28530 | 22.0  | 11.2  | 11.0  | 7.0   | 15.0  | 0.0  |
| 21UR-28540 | 40.0  | 16.0  | 39.0  | 9.0   | 16.0  | 2.0  |
| 21UR-28550 | 0.0   | 0.0   | 1.0   | 0.0   | 0.0   | 0.0  |
| 21UR-28560 | 14.0  | 1.0   | 16.0  | 7.0   | 8.0   | 1.0  |
| 21UR-28570 | 0.0   | 0.0   | 0.0   | 0.0   | 1.0   | 1.0  |
| 21UR-28580 | 0.0   | 0.0   | 0.0   | 0.0   | 1.0   | 0.0  |
| 21UR-28590 | 0.0   | 0.0   | 0.0   | 0.0   | 0.0   | 0.0  |
| 21UR-2860  | 1.0   | 1.0   | 0.0   | 0.0   | 4.0   | 0.0  |
| 21UR-28600 | 0.0   | 0.0   | 0.0   | 0.0   | 0.0   | 0.1  |
| 21UR-28610 | 53.0  | 12.0  | 57.0  | 15.0  | 14.0  | 0.0  |
| 21UR-28620 | 0.0   | 17.0  | 0.0   | 0.0   | 8.5   | 1.0  |
| 21UR-28630 | 25.0  | 0.0   | 8.0   | 4.0   | 0.0   | 0.0  |
| 21UR-28640 | 0.0   | 0.1   | 0.0   | 0.0   | 0.0   | 0.0  |
| 21UR-28650 | 27.5  | 69.0  | 46.0  | 11.0  | 66.0  | 8.0  |
| 21UR-28660 | 19.0  | 2.0   | 13.0  | 4.0   | 6.0   | 1.0  |
| 21UR-28670 | 4.0   | 11.0  | 19.0  | 4.0   | 24.0  | 2.0  |
| 21UR-28680 | 286.5 | 151.0 | 214.0 | 100.0 | 167.0 | 19.0 |
| 21UR-28690 | 0.0   | 0.0   | 0.0   | 0.0   | 0.0   | 0.0  |
| 21UR-2870  | 0.0   | 0.0   | 0.0   | 0.0   | 0.0   | 0.0  |
| 21UR-28700 | 19.0  | 7.0   | 9.0   | 4.0   | 5.0   | 0.0  |
| 21UR-28720 | 464.0 | 112.0 | 421.5 | 259.0 | 100.0 | 15.0 |
| 21UR-28730 | 0.0   | 1.0   | 1.0   | 0.0   | 0.0   | 1.0  |
| 21UR-28740 | 1.0   | 2.0   | 1.0   | 1.0   | 6.0   | 0.0  |
| 21UR-28750 | 221.0 | 125.0 | 180.0 | 82.7  | 88.0  | 17.0 |
| 21UR-28760 | 0.0   | 5.0   | 0.0   | 0.0   | 0.0   | 0.0  |
| 21UR-28770 | 0.0   | 1.0   | 1.0   | 0.0   | 0.0   | 0.0  |
| 21UR-28780 | 15.0  | 1.0   | 5.0   | 8.0   | 1.0   | 0.0  |
| 21UR-28790 | 0.0   | 0.0   | 0.0   | 0.0   | 0.0   | 0.0  |
| 21UR-2880  | 0.0   | 4.0   | 0.0   | 0.0   | 4.0   | 1.0  |
| 21UR-28800 | 14.0  | 1.0   | 2.0   | 1.0   | 1.0   | 0.0  |
| 21UR-28810 | 0.0   | 0.0   | 0.0   | 0.0   | 4.0   | 0.0  |
| 21UR-28820 | 0.0   | 0.0   | 0.0   | 0.0   | 0.0   | 0.0  |
| 21UR-28830 | 0.0   | 16.0  | 0.0   | 2.0   | 4.0   | 0.0  |
| 21UR-28840 | 45.0  | 1.0   | 34.0  | 10.0  | 3.0   | 1.0  |
| 21UR-28850 | 16.0  | 4.0   | 5.0   | 0.0   | 10.0  | 1.0  |
| 21UR-28860 | 0.0   | 0.0   | 0.0   | 0.0   | 0.0   | 0.0  |
| 21UR-28870 | 0.0   | 16.0  | 1.0   | 0.0   | 9.0   | 0.0  |
| 21UR-28880 | 20.0  | 1.0   | 24.0  | 6.0   | 8.0   | 0.0  |
| 21UR-28890 | 27.0  | 0.0   | 20.0  | 11.0  | 15.0  | 0.0  |
| 21UR-2890  | 0.0   | 0.0   | 0.0   | 0.0   | 0.0   | 0.0  |
| 21UR-28900 | 0.0   | 1.0   | 0.0   | 0.0   | 0.0   | 0.0  |
| 21UR-28910 | 5.0   | 1.0   | 6.0   | 3.0   | 1.0   | 0.0  |
| 21UR-28920 | 100.0 | 17.0  | 100.0 | 83.0  | 93.0  | 1.0  |

|            |        |       |        |       |       |      |
|------------|--------|-------|--------|-------|-------|------|
| 21UR-28930 | 47.0   | 2.0   | 27.0   | 0.0   | 3.0   | 4.0  |
| 21UR-28940 | 1.0    | 0.0   | 0.0    | 4.0   | 3.0   | 1.0  |
| 21UR-28950 | 1.0    | 0.0   | 1.0    | 0.0   | 0.0   | 1.0  |
| 21UR-28960 | 10.0   | 0.0   | 1.0    | 1.0   | 8.0   | 0.0  |
| 21UR-28970 | 0.0    | 0.0   | 0.0    | 0.0   | 0.0   | 0.0  |
| 21UR-28980 | 1.0    | 6.0   | 0.0    | 0.0   | 6.0   | 0.0  |
| 21UR-28990 | 0.0    | 0.0   | 0.0    | 0.0   | 2.0   | 0.0  |
| 21UR-290   | 0.0    | 0.0   | 0.0    | 0.0   | 0.0   | 0.0  |
| 21UR-2900  | 3.0    | 0.0   | 1.0    | 0.0   | 0.0   | 0.0  |
| 21UR-29000 | 38.0   | 0.0   | 49.0   | 6.0   | 2.0   | 0.0  |
| 21UR-29010 | 17.0   | 2.0   | 5.0    | 6.0   | 0.0   | 0.0  |
| 21UR-29020 | 10.0   | 4.0   | 23.0   | 1.0   | 0.0   | 1.0  |
| 21UR-29030 | 32.0   | 64.5  | 38.0   | 8.0   | 80.0  | 8.0  |
| 21UR-29040 | 13.0   | 0.0   | 1.0    | 1.0   | 2.0   | 0.0  |
| 21UR-29050 | 0.0    | 0.0   | 0.0    | 0.0   | 0.0   | 0.0  |
| 21UR-29060 | 138.0  | 82.7  | 104.0  | 66.0  | 92.0  | 9.5  |
| 21UR-29070 | 16.0   | 9.0   | 18.0   | 4.0   | 5.0   | 0.0  |
| 21UR-29080 | 84.0   | 18.0  | 73.0   | 40.0  | 40.0  | 0.0  |
| 21UR-29090 | 1585.0 | 27.0  | 1119.0 | 381.0 | 41.0  | 4.0  |
| 21UR-2910  | 4.0    | 1.0   | 5.0    | 1.0   | 2.0   | 0.0  |
| 21UR-29100 | 6.0    | 0.0   | 2.0    | 6.0   | 1.0   | 1.0  |
| 21UR-29110 | 26.0   | 8.0   | 9.0    | 0.0   | 1.0   | 4.0  |
| 21UR-29120 | 0.0    | 0.0   | 0.0    | 0.0   | 0.0   | 0.0  |
| 21UR-29130 | 1.0    | 0.0   | 0.0    | 0.0   | 0.0   | 0.0  |
| 21UR-29140 | 0.0    | 0.0   | 0.0    | 0.0   | 0.0   | 0.0  |
| 21UR-29150 | 0.0    | 0.0   | 0.0    | 0.0   | 0.0   | 0.0  |
| 21UR-29160 | 4.0    | 1.0   | 6.0    | 0.0   | 4.0   | 0.0  |
| 21UR-29170 | 1028.0 | 200.0 | 1304.0 | 665.0 | 235.7 | 24.0 |
| 21UR-29180 | 4.0    | 1.0   | 6.0    | 0.0   | 4.0   | 0.0  |
| 21UR-29190 | 120.0  | 23.0  | 77.0   | 56.0  | 50.0  | 6.0  |
| 21UR-29200 | 0.0    | 0.0   | 0.0    | 0.0   | 0.0   | 0.0  |
| 21UR-29210 | 0.0    | 0.0   | 0.0    | 0.0   | 5.0   | 0.0  |
| 21UR-29220 | 0.0    | 0.0   | 1.0    | 0.0   | 3.0   | 0.0  |
| 21UR-29230 | 0.0    | 0.0   | 0.0    | 0.0   | 0.0   | 0.0  |
| 21UR-29240 | 0.0    | 0.0   | 0.0    | 0.0   | 0.0   | 0.2  |
| 21UR-29250 | 5.0    | 0.0   | 5.0    | 0.0   | 0.0   | 0.0  |
| 21UR-29260 | 1.0    | 3.0   | 8.0    | 1.0   | 3.0   | 0.0  |
| 21UR-29270 | 0.0    | 0.0   | 0.0    | 0.0   | 0.0   | 0.0  |
| 21UR-29280 | 0.0    | 0.0   | 0.0    | 0.0   | 0.0   | 0.0  |
| 21UR-29290 | 72.0   | 11.0  | 60.0   | 25.0  | 12.0  | 0.0  |
| 21UR-2930  | 0.0    | 0.0   | 0.0    | 0.0   | 0.0   | 0.0  |
| 21UR-29300 | 0.0    | 0.0   | 0.0    | 0.0   | 0.0   | 0.0  |
| 21UR-29310 | 0.0    | 0.0   | 0.0    | 0.0   | 1.0   | 0.0  |
| 21UR-29320 | 8.0    | 1.0   | 0.0    | 1.0   | 6.0   | 0.0  |
| 21UR-29330 | 8.0    | 7.0   | 1.0    | 1.0   | 8.0   | 5.0  |
| 21UR-29340 | 9.0    | 7.0   | 8.0    | 1.0   | 18.0  | 0.0  |
| 21UR-29350 | 1.0    | 0.0   | 1.0    | 0.0   | 9.0   | 0.0  |
| 21UR-29360 | 1.0    | 0.0   | 0.0    | 0.0   | 1.0   | 0.0  |
| 21UR-29370 | 237.0  | 37.0  | 132.0  | 74.0  | 9.0   | 1.0  |
| 21UR-29380 | 1.0    | 0.0   | 1.0    | 0.0   | 1.0   | 0.0  |
| 21UR-29390 | 18.0   | 3.0   | 8.0    | 4.0   | 7.0   | 0.0  |

|            |        |       |        |        |       |      |
|------------|--------|-------|--------|--------|-------|------|
| 21UR-2940  | 3385.0 | 398.0 | 2231.5 | 1337.3 | 326.3 | 46.0 |
| 21UR-29400 | 110.0  | 13.0  | 72.0   | 30.0   | 19.0  | 0.0  |
| 21UR-29410 | 1.0    | 0.0   | 0.0    | 0.0    | 0.0   | 0.0  |
| 21UR-29420 | 12.0   | 13.0  | 13.0   | 1.0    | 9.0   | 0.0  |
| 21UR-29430 | 471.0  | 62.0  | 449.0  | 135.0  | 146.0 | 16.0 |
| 21UR-29440 | 4.0    | 16.5  | 4.0    | 0.0    | 4.0   | 0.0  |
| 21UR-29450 | 0.0    | 0.0   | 0.0    | 0.0    | 0.0   | 0.0  |
| 21UR-29460 | 0.0    | 0.0   | 0.0    | 0.0    | 0.0   | 0.0  |
| 21UR-29470 | 0.0    | 0.0   | 0.0    | 0.0    | 0.0   | 0.0  |
| 21UR-29480 | 1.0    | 0.0   | 8.0    | 1.0    | 1.0   | 0.0  |
| 21UR-29490 | 1135.0 | 183.0 | 1018.0 | 637.0  | 433.0 | 29.0 |
| 21UR-2950  | 4.0    | 5.0   | 3.0    | 1.0    | 19.2  | 0.0  |
| 21UR-29500 | 0.0    | 0.0   | 0.0    | 0.0    | 0.0   | 0.0  |
| 21UR-29510 | 1.0    | 1.0   | 0.0    | 0.0    | 0.0   | 0.0  |
| 21UR-29520 | 99.0   | 9.0   | 56.0   | 27.0   | 5.0   | 2.0  |
| 21UR-29530 | 0.0    | 1.0   | 0.0    | 0.0    | 0.0   | 1.0  |
| 21UR-29540 | 136.0  | 79.0  | 153.0  | 39.0   | 113.0 | 6.0  |
| 21UR-29550 | 0.0    | 0.0   | 0.0    | 0.0    | 1.0   | 0.0  |
| 21UR-29560 | 14.0   | 1.0   | 8.0    | 1.0    | 1.0   | 0.0  |
| 21UR-29570 | 10.0   | 13.0  | 10.0   | 3.0    | 3.0   | 4.0  |
| 21UR-29580 | 1.0    | 1.0   | 0.0    | 0.0    | 6.0   | 0.0  |
| 21UR-29590 | 1.0    | 9.0   | 8.0    | 0.0    | 3.0   | 0.0  |
| 21UR-2960  | 395.0  | 37.0  | 221.0  | 58.0   | 174.1 | 13.0 |
| 21UR-29600 | 0.0    | 0.0   | 6.0    | 1.0    | 0.0   | 0.0  |
| 21UR-29610 | 0.0    | 0.0   | 0.0    | 0.0    | 0.0   | 0.0  |
| 21UR-29620 | 10.0   | 0.0   | 17.0   | 4.0    | 3.0   | 1.0  |
| 21UR-29630 | 0.0    | 1.0   | 0.0    | 0.0    | 0.0   | 0.0  |
| 21UR-29640 | 4.0    | 0.0   | 10.0   | 0.0    | 0.0   | 0.0  |
| 21UR-29650 | 1.0    | 0.0   | 0.0    | 0.0    | 0.0   | 0.0  |
| 21UR-29660 | 12.0   | 18.0  | 15.0   | 3.0    | 18.3  | 0.0  |
| 21UR-29670 | 0.0    | 0.0   | 0.0    | 0.0    | 1.0   | 0.0  |
| 21UR-29680 | 0.0    | 0.0   | 1.0    | 0.0    | 0.0   | 0.0  |
| 21UR-29690 | 0.0    | 0.0   | 1.0    | 0.0    | 0.0   | 0.0  |
| 21UR-2970  | 0.0    | 0.0   | 0.0    | 0.0    | 0.0   | 0.0  |
| 21UR-29700 | 1.0    | 0.0   | 0.0    | 0.0    | 0.0   | 0.0  |
| 21UR-29710 | 16.0   | 8.0   | 10.0   | 10.0   | 31.0  | 0.0  |
| 21UR-29720 | 0.0    | 0.0   | 0.0    | 0.0    | 0.0   | 0.0  |
| 21UR-29740 | 176.5  | 10.2  | 124.0  | 65.0   | 20.0  | 0.0  |
| 21UR-29750 | 0.0    | 0.0   | 0.0    | 0.0    | 0.0   | 0.0  |
| 21UR-29760 | 0.0    | 0.1   | 0.0    | 1.0    | 0.0   | 0.0  |
| 21UR-29770 | 16.0   | 0.0   | 6.0    | 1.0    | 1.0   | 0.0  |
| 21UR-29780 | 7.0    | 0.0   | 1.0    | 1.0    | 1.0   | 0.0  |
| 21UR-29790 | 0.0    | 1.0   | 0.0    | 0.0    | 4.0   | 0.0  |
| 21UR-2980  | 1.0    | 0.0   | 0.0    | 0.0    | 0.0   | 0.0  |
| 21UR-29800 | 0.0    | 0.0   | 0.0    | 0.0    | 0.0   | 0.0  |
| 21UR-29810 | 0.0    | 0.0   | 0.0    | 0.0    | 0.0   | 1.0  |
| 21UR-29820 | 0.0    | 0.0   | 0.0    | 0.0    | 0.0   | 0.0  |
| 21UR-29830 | 4.0    | 11.0  | 0.0    | 0.0    | 4.0   | 0.0  |
| 21UR-29840 | 0.0    | 0.0   | 0.0    | 0.0    | 0.0   | 0.0  |
| 21UR-29850 | 12.0   | 0.0   | 5.0    | 1.0    | 8.0   | 0.0  |
| 21UR-29860 | 4.0    | 0.0   | 6.0    | 0.0    | 1.0   | 0.0  |

|            |       |       |       |       |       |      |
|------------|-------|-------|-------|-------|-------|------|
| 21UR-29870 | 0.0   | 0.0   | 0.0   | 0.0   | 0.0   | 0.0  |
| 21UR-29880 | 0.0   | 0.0   | 0.0   | 0.0   | 0.0   | 0.0  |
| 21UR-29890 | 37.0  | 1.0   | 40.0  | 18.0  | 3.0   | 0.0  |
| 21UR-2990  | 0.0   | 0.0   | 0.0   | 0.0   | 0.0   | 0.0  |
| 21UR-29900 | 0.0   | 0.0   | 8.0   | 0.0   | 1.0   | 0.0  |
| 21UR-29910 | 4.0   | 2.0   | 1.0   | 4.0   | 0.0   | 0.0  |
| 21UR-29920 | 0.0   | 0.0   | 0.0   | 0.0   | 0.0   | 0.0  |
| 21UR-29930 | 0.0   | 0.0   | 1.0   | 0.0   | 0.0   | 0.0  |
| 21UR-29940 | 21.0  | 7.0   | 14.0  | 10.0  | 8.0   | 0.0  |
| 21UR-29950 | 0.0   | 0.0   | 4.0   | 0.0   | 0.0   | 0.0  |
| 21UR-29960 | 0.0   | 0.0   | 0.0   | 0.0   | 0.0   | 0.0  |
| 21UR-29970 | 1.0   | 0.0   | 5.0   | 1.0   | 6.0   | 1.0  |
| 21UR-29980 | 14.0  | 1.0   | 12.0  | 0.0   | 3.0   | 0.0  |
| 21UR-29990 | 4.0   | 0.0   | 1.0   | 0.0   | 0.0   | 0.0  |
| 21UR-30    | 4.0   | 4.0   | 1.0   | 0.0   | 1.0   | 0.0  |
| 21UR-300   | 76.0  | 75.0  | 71.2  | 13.0  | 109.0 | 15.0 |
| 21UR-3000  | 0.0   | 0.0   | 0.0   | 0.0   | 0.0   | 1.0  |
| 21UR-30000 | 0.0   | 4.0   | 1.0   | 0.0   | 0.0   | 0.0  |
| 21UR-30010 | 1.0   | 0.0   | 1.0   | 0.0   | 1.0   | 0.0  |
| 21UR-30020 | 1.0   | 0.0   | 4.0   | 0.0   | 4.0   | 0.0  |
| 21UR-30030 | 4.0   | 1.0   | 4.0   | 1.0   | 1.0   | 0.0  |
| 21UR-30040 | 1.0   | 1.0   | 1.0   | 0.0   | 0.0   | 0.0  |
| 21UR-30060 | 47.0  | 58.0  | 42.0  | 11.0  | 45.0  | 6.0  |
| 21UR-30070 | 0.0   | 0.0   | 0.0   | 0.0   | 0.0   | 0.0  |
| 21UR-30080 | 32.0  | 18.0  | 23.0  | 6.0   | 10.0  | 13.0 |
| 21UR-30090 | 1.0   | 0.0   | 1.0   | 0.0   | 2.0   | 0.0  |
| 21UR-3010  | 1.0   | 1.0   | 6.0   | 0.0   | 8.0   | 1.0  |
| 21UR-30100 | 54.0  | 36.0  | 60.0  | 30.5  | 15.0  | 0.0  |
| 21UR-30110 | 0.0   | 0.0   | 0.0   | 0.0   | 0.0   | 0.0  |
| 21UR-30120 | 0.0   | 0.0   | 0.0   | 0.0   | 0.0   | 0.0  |
| 21UR-30130 | 0.0   | 3.0   | 0.0   | 0.0   | 0.0   | 0.0  |
| 21UR-30140 | 27.0  | 4.0   | 29.0  | 22.0  | 6.0   | 1.0  |
| 21UR-30150 | 0.0   | 1.0   | 0.0   | 0.0   | 10.0  | 1.0  |
| 21UR-30160 | 466.0 | 217.0 | 373.0 | 113.0 | 236.0 | 10.0 |
| 21UR-30170 | 7.0   | 4.0   | 13.0  | 1.0   | 9.0   | 1.0  |
| 21UR-30180 | 0.0   | 17.0  | 1.0   | 0.0   | 5.0   | 4.0  |
| 21UR-30190 | 17.0  | 1.0   | 21.0  | 4.0   | 1.0   | 0.0  |
| 21UR-3020  | 0.0   | 0.0   | 0.0   | 0.0   | 0.0   | 0.0  |
| 21UR-30200 | 3.0   | 6.0   | 8.0   | 0.0   | 7.0   | 0.0  |
| 21UR-30210 | 0.0   | 0.0   | 0.0   | 0.0   | 0.0   | 0.0  |
| 21UR-30220 | 1.0   | 2.0   | 1.0   | 0.0   | 0.0   | 0.0  |
| 21UR-30230 | 10.0  | 22.0  | 2.0   | 1.0   | 10.3  | 0.0  |
| 21UR-30240 | 41.0  | 34.0  | 63.0  | 12.0  | 36.0  | 1.0  |
| 21UR-30250 | 1.0   | 0.0   | 0.0   | 0.0   | 1.0   | 0.0  |
| 21UR-30260 | 0.0   | 1.0   | 4.0   | 0.0   | 0.0   | 1.0  |
| 21UR-30270 | 13.0  | 11.0  | 14.0  | 4.0   | 12.0  | 0.0  |
| 21UR-30280 | 0.0   | 0.0   | 0.0   | 0.0   | 0.0   | 0.0  |
| 21UR-30290 | 28.0  | 10.0  | 27.0  | 6.0   | 10.0  | 2.0  |
| 21UR-3030  | 15.0  | 0.0   | 17.0  | 8.0   | 2.0   | 0.0  |
| 21UR-30300 | 226.0 | 17.0  | 131.0 | 84.0  | 52.0  | 2.0  |
| 21UR-30310 | 6.0   | 0.0   | 1.0   | 0.0   | 0.0   | 0.0  |

|            |       |       |       |       |       |      |
|------------|-------|-------|-------|-------|-------|------|
| 21UR-30320 | 10.0  | 4.5   | 14.5  | 0.0   | 10.0  | 1.0  |
| 21UR-30330 | 0.0   | 0.0   | 1.0   | 0.0   | 0.0   | 0.0  |
| 21UR-30340 | 0.0   | 0.0   | 0.0   | 0.0   | 0.0   | 0.0  |
| 21UR-30350 | 0.0   | 0.0   | 0.0   | 1.0   | 0.0   | 0.0  |
| 21UR-30360 | 73.0  | 13.0  | 29.5  | 12.0  | 4.0   | 1.0  |
| 21UR-30370 | 6.0   | 0.0   | 1.0   | 0.0   | 0.0   | 0.0  |
| 21UR-30380 | 6.0   | 3.0   | 8.0   | 6.0   | 1.0   | 0.0  |
| 21UR-30390 | 12.0  | 75.1  | 12.7  | 8.0   | 11.0  | 6.3  |
| 21UR-3040  | 4.0   | 8.0   | 0.0   | 0.0   | 6.0   | 0.0  |
| 21UR-30400 | 1.0   | 0.0   | 0.0   | 0.0   | 0.0   | 0.0  |
| 21UR-30410 | 2.0   | 0.0   | 0.0   | 0.0   | 1.0   | 0.0  |
| 21UR-30420 | 1.0   | 0.0   | 1.0   | 0.0   | 0.0   | 0.0  |
| 21UR-30430 | 4.0   | 0.0   | 12.0  | 8.0   | 0.0   | 0.0  |
| 21UR-30440 | 0.0   | 0.0   | 0.0   | 0.0   | 0.0   | 0.0  |
| 21UR-30450 | 1.0   | 0.0   | 0.0   | 0.0   | 0.0   | 0.0  |
| 21UR-30460 | 0.0   | 0.0   | 1.0   | 0.0   | 0.0   | 0.0  |
| 21UR-30470 | 0.0   | 0.0   | 0.0   | 0.0   | 0.0   | 0.0  |
| 21UR-30480 | 11.0  | 8.0   | 3.0   | 0.0   | 4.0   | 4.0  |
| 21UR-30490 | 0.0   | 0.0   | 0.0   | 0.0   | 0.0   | 0.0  |
| 21UR-3050  | 0.0   | 0.0   | 0.0   | 0.0   | 0.0   | 0.0  |
| 21UR-30500 | 5.0   | 1.0   | 1.0   | 0.0   | 1.0   | 0.0  |
| 21UR-30510 | 52.0  | 62.0  | 54.0  | 20.0  | 45.0  | 14.0 |
| 21UR-30520 | 193.0 | 33.0  | 110.0 | 33.0  | 91.5  | 15.0 |
| 21UR-30530 | 0.0   | 0.0   | 0.0   | 0.0   | 0.0   | 0.0  |
| 21UR-30540 | 30.0  | 51.0  | 37.0  | 17.0  | 56.0  | 3.0  |
| 21UR-30550 | 6.0   | 0.0   | 6.0   | 0.0   | 0.0   | 0.0  |
| 21UR-30560 | 0.0   | 2.0   | 6.0   | 8.0   | 8.0   | 1.0  |
| 21UR-30570 | 1.0   | 2.0   | 3.0   | 0.0   | 1.0   | 1.0  |
| 21UR-30580 | 0.0   | 0.0   | 0.0   | 0.0   | 0.0   | 0.0  |
| 21UR-30590 | 5.0   | 9.0   | 1.0   | 0.0   | 2.0   | 1.0  |
| 21UR-30600 | 1.0   | 9.0   | 6.0   | 0.0   | 4.0   | 0.0  |
| 21UR-30610 | 0.0   | 0.0   | 4.0   | 1.0   | 1.0   | 0.0  |
| 21UR-30620 | 0.0   | 0.0   | 0.0   | 0.0   | 0.0   | 0.0  |
| 21UR-30630 | 4.0   | 2.0   | 4.0   | 1.0   | 4.0   | 1.0  |
| 21UR-30640 | 1.0   | 0.0   | 0.0   | 0.0   | 0.0   | 0.0  |
| 21UR-30650 | 0.0   | 0.0   | 0.0   | 0.0   | 0.0   | 0.0  |
| 21UR-30660 | 0.0   | 0.0   | 0.0   | 0.0   | 0.0   | 4.0  |
| 21UR-30670 | 0.0   | 2.0   | 0.0   | 0.0   | 0.0   | 0.0  |
| 21UR-30680 | 0.0   | 0.0   | 0.0   | 0.0   | 0.0   | 0.0  |
| 21UR-30690 | 1.0   | 3.0   | 1.0   | 0.0   | 0.0   | 0.0  |
| 21UR-3070  | 6.0   | 2.0   | 4.0   | 0.0   | 4.3   | 1.0  |
| 21UR-30700 | 2.0   | 0.0   | 0.0   | 0.0   | 0.0   | 0.0  |
| 21UR-30720 | 4.0   | 6.0   | 1.0   | 4.0   | 10.0  | 1.0  |
| 21UR-30730 | 0.0   | 0.0   | 0.0   | 0.0   | 0.0   | 0.0  |
| 21UR-30740 | 269.8 | 106.3 | 250.5 | 116.5 | 82.5  | 2.0  |
| 21UR-30750 | 6.0   | 0.0   | 0.0   | 0.0   | 0.0   | 0.0  |
| 21UR-30760 | 1.0   | 0.0   | 0.0   | 0.0   | 0.0   | 0.0  |
| 21UR-30770 | 4.0   | 1.0   | 4.0   | 0.0   | 9.0   | 1.0  |
| 21UR-30780 | 371.0 | 14.0  | 221.0 | 141.0 | 117.5 | 3.0  |
| 21UR-30790 | 0.0   | 0.0   | 0.0   | 0.0   | 0.0   | 0.0  |
| 21UR-3080  | 0.0   | 0.0   | 0.0   | 0.0   | 0.0   | 0.0  |

|            |        |       |        |       |       |      |
|------------|--------|-------|--------|-------|-------|------|
| 21UR-30800 | 0.0    | 0.0   | 1.0    | 0.0   | 0.0   | 0.0  |
| 21UR-30810 | 26.0   | 12.0  | 26.0   | 6.0   | 15.0  | 0.0  |
| 21UR-30820 | 6.0    | 4.0   | 0.0    | 1.0   | 8.0   | 0.0  |
| 21UR-30830 | 1.0    | 3.0   | 8.0    | 0.5   | 5.0   | 2.0  |
| 21UR-30840 | 74.0   | 2.0   | 39.0   | 1.0   | 1.0   | 0.0  |
| 21UR-30850 | 358.0  | 88.0  | 313.0  | 157.5 | 80.0  | 1.0  |
| 21UR-30860 | 6.0    | 1.0   | 0.0    | 0.0   | 2.0   | 0.0  |
| 21UR-30870 | 17.0   | 4.0   | 17.0   | 4.0   | 10.0  | 4.0  |
| 21UR-30880 | 2.0    | 3.0   | 8.0    | 0.0   | 1.0   | 0.0  |
| 21UR-30890 | 0.0    | 1.0   | 1.0    | 0.0   | 0.0   | 0.0  |
| 21UR-3090  | 0.0    | 0.0   | 0.0    | 0.0   | 6.0   | 0.0  |
| 21UR-30900 | 0.0    | 0.0   | 0.0    | 0.0   | 0.0   | 0.0  |
| 21UR-30910 | 0.0    | 0.0   | 0.0    | 0.0   | 0.0   | 0.0  |
| 21UR-30920 | 498.0  | 19.0  | 373.0  | 147.0 | 114.0 | 4.0  |
| 21UR-30930 | 0.0    | 6.0   | 0.0    | 0.0   | 0.0   | 0.0  |
| 21UR-30940 | 0.0    | 0.0   | 0.0    | 0.0   | 0.0   | 0.0  |
| 21UR-30950 | 14.7   | 7.0   | 8.0    | 3.0   | 12.0  | 2.0  |
| 21UR-30960 | 6.0    | 1.1   | 1.0    | 4.0   | 1.0   | 0.0  |
| 21UR-30970 | 17.0   | 16.0  | 9.0    | 9.0   | 21.0  | 0.0  |
| 21UR-30980 | 47.0   | 0.0   | 18.0   | 9.0   | 0.0   | 0.0  |
| 21UR-30990 | 1.0    | 0.0   | 1.0    | 0.0   | 0.0   | 0.0  |
| 21UR-310   | 11.0   | 22.0  | 17.0   | 0.0   | 35.0  | 1.0  |
| 21UR-3100  | 32.0   | 1.0   | 54.0   | 12.0  | 1.0   | 0.0  |
| 21UR-31000 | 38.0   | 28.0  | 49.0   | 8.0   | 26.0  | 24.0 |
| 21UR-31010 | 0.0    | 0.0   | 0.0    | 0.0   | 0.0   | 0.0  |
| 21UR-31020 | 4.0    | 1.0   | 0.0    | 0.0   | 0.0   | 0.0  |
| 21UR-31030 | 79.0   | 44.0  | 82.0   | 21.0  | 14.0  | 4.0  |
| 21UR-31040 | 0.0    | 4.0   | 0.0    | 0.0   | 2.0   | 0.0  |
| 21UR-31050 | 1.0    | 3.0   | 0.0    | 0.0   | 0.0   | 0.0  |
| 21UR-31060 | 1732.3 | 143.0 | 1343.0 | 853.0 | 224.0 | 14.0 |
| 21UR-31070 | 1.0    | 0.0   | 1.0    | 4.0   | 6.0   | 0.0  |
| 21UR-31080 | 1.0    | 0.0   | 6.0    | 0.0   | 2.0   | 0.0  |
| 21UR-31090 | 6.0    | 1.0   | 4.0    | 0.0   | 0.0   | 0.0  |
| 21UR-3110  | 0.0    | 0.0   | 1.0    | 4.0   | 0.0   | 0.0  |
| 21UR-31100 | 17.0   | 0.0   | 6.0    | 8.0   | 2.0   | 0.0  |
| 21UR-31110 | 0.0    | 4.0   | 4.0    | 0.0   | 0.0   | 0.0  |
| 21UR-31120 | 0.0    | 11.0  | 4.0    | 1.0   | 6.0   | 0.0  |
| 21UR-31130 | 0.0    | 0.0   | 0.0    | 0.0   | 0.0   | 0.0  |
| 21UR-31140 | 218.0  | 124.0 | 179.0  | 99.0  | 305.6 | 28.0 |
| 21UR-31150 | 0.0    | 0.0   | 0.0    | 0.0   | 1.0   | 0.0  |
| 21UR-31160 | 0.0    | 0.0   | 0.0    | 0.0   | 0.0   | 0.0  |
| 21UR-31170 | 14.0   | 0.0   | 8.0    | 8.0   | 1.0   | 1.0  |
| 21UR-31180 | 15.0   | 3.0   | 18.0   | 8.0   | 7.0   | 1.0  |
| 21UR-31190 | 5.0    | 6.0   | 1.0    | 0.0   | 6.0   | 1.0  |
| 21UR-31200 | 23.0   | 6.0   | 27.0   | 24.0  | 20.0  | 4.0  |
| 21UR-31210 | 0.0    | 0.0   | 1.0    | 0.0   | 0.0   | 1.0  |
| 21UR-31230 | 0.0    | 0.0   | 0.0    | 0.0   | 0.0   | 0.0  |
| 21UR-31240 | 120.0  | 50.0  | 111.0  | 37.0  | 209.0 | 2.0  |
| 21UR-31250 | 4.0    | 4.0   | 4.0    | 0.0   | 1.0   | 0.0  |
| 21UR-31270 | 0.0    | 0.0   | 0.0    | 0.0   | 0.0   | 0.0  |
| 21UR-31280 | 15.0   | 22.0  | 28.0   | 6.0   | 23.5  | 0.0  |

|            |        |       |        |        |       |      |
|------------|--------|-------|--------|--------|-------|------|
| 21UR-31290 | 7373.5 | 533.0 | 4552.5 | 1665.0 | 806.5 | 48.0 |
| 21UR-3130  | 160.0  | 18.0  | 148.0  | 56.0   | 19.0  | 1.0  |
| 21UR-31300 | 0.0    | 0.0   | 0.0    | 0.0    | 0.0   | 0.0  |
| 21UR-31310 | 6.0    | 20.0  | 1.0    | 0.0    | 6.0   | 11.0 |
| 21UR-31320 | 1.0    | 0.0   | 1.0    | 1.0    | 4.0   | 0.0  |
| 21UR-31330 | 0.0    | 0.0   | 0.0    | 0.0    | 0.0   | 0.0  |
| 21UR-31340 | 0.0    | 0.0   | 0.0    | 0.0    | 0.0   | 0.0  |
| 21UR-31350 | 1.0    | 0.0   | 4.0    | 4.0    | 20.0  | 0.0  |
| 21UR-31360 | 1.0    | 10.0  | 1.0    | 0.0    | 2.0   | 2.0  |
| 21UR-31370 | 0.0    | 0.0   | 0.0    | 0.0    | 0.0   | 0.0  |
| 21UR-31380 | 55.0   | 3.5   | 34.0   | 20.0   | 1.0   | 0.0  |
| 21UR-31390 | 0.0    | 0.0   | 0.0    | 0.0    | 0.0   | 0.0  |
| 21UR-3140  | 0.0    | 0.0   | 0.0    | 0.0    | 0.0   | 0.0  |
| 21UR-31400 | 0.0    | 0.0   | 0.0    | 0.0    | 0.0   | 0.0  |
| 21UR-31410 | 0.0    | 0.0   | 0.0    | 0.0    | 0.0   | 0.0  |
| 21UR-31420 | 6.0    | 1.0   | 1.0    | 1.0    | 0.0   | 1.0  |
| 21UR-31430 | 0.0    | 0.0   | 1.0    | 0.0    | 1.0   | 1.0  |
| 21UR-31440 | 0.0    | 1.0   | 0.0    | 0.0    | 0.0   | 0.0  |
| 21UR-31450 | 1.0    | 0.0   | 1.0    | 0.0    | 0.0   | 0.0  |
| 21UR-31460 | 1.0    | 0.0   | 0.0    | 0.0    | 0.0   | 0.0  |
| 21UR-31470 | 0.0    | 0.0   | 0.0    | 0.0    | 0.0   | 0.0  |
| 21UR-31480 | 0.0    | 0.0   | 0.0    | 1.0    | 0.0   | 0.0  |
| 21UR-31490 | 40.0   | 17.0  | 17.0   | 7.5    | 20.0  | 0.0  |
| 21UR-3150  | 0.0    | 0.0   | 0.0    | 0.0    | 0.0   | 0.0  |
| 21UR-31500 | 6.0    | 3.0   | 7.0    | 1.0    | 2.0   | 1.0  |
| 21UR-31510 | 1.0    | 1.0   | 0.0    | 0.0    | 1.0   | 0.0  |
| 21UR-31520 | 4.0    | 6.0   | 0.0    | 0.0    | 2.0   | 0.0  |
| 21UR-31530 | 20.0   | 8.0   | 33.0   | 13.0   | 9.0   | 1.0  |
| 21UR-31540 | 0.0    | 0.0   | 0.0    | 0.0    | 0.0   | 0.0  |
| 21UR-31550 | 4.0    | 4.0   | 8.0    | 1.0    | 0.0   | 0.0  |
| 21UR-31560 | 0.0    | 4.2   | 0.0    | 0.0    | 4.0   | 1.0  |
| 21UR-31570 | 31.0   | 26.0  | 35.0   | 8.0    | 13.0  | 4.1  |
| 21UR-31580 | 1247.0 | 121.0 | 1008.0 | 491.5  | 245.0 | 4.0  |
| 21UR-31590 | 0.0    | 0.0   | 0.0    | 0.0    | 0.0   | 0.0  |
| 21UR-3160  | 0.0    | 3.0   | 0.0    | 0.0    | 1.0   | 0.0  |
| 21UR-31600 | 0.0    | 1.0   | 4.0    | 1.0    | 7.0   | 0.0  |
| 21UR-31610 | 20.0   | 4.0   | 14.0   | 2.0    | 8.0   | 1.0  |
| 21UR-31620 | 0.0    | 1.0   | 0.0    | 0.0    | 0.0   | 0.0  |
| 21UR-31630 | 0.0    | 0.0   | 1.0    | 1.0    | 0.0   | 0.0  |
| 21UR-31640 | 0.0    | 0.0   | 0.0    | 0.0    | 0.0   | 0.0  |
| 21UR-31650 | 0.0    | 0.0   | 0.0    | 0.0    | 0.0   | 0.0  |
| 21UR-31660 | 4.0    | 4.0   | 10.0   | 1.0    | 6.0   | 0.0  |
| 21UR-31670 | 3.0    | 4.0   | 7.5    | 1.0    | 0.0   | 0.0  |
| 21UR-31680 | 59.0   | 6.1   | 40.0   | 11.0   | 32.0  | 0.1  |
| 21UR-31690 | 0.0    | 1.0   | 0.0    | 0.0    | 0.0   | 0.0  |
| 21UR-3170  | 12.0   | 32.0  | 14.0   | 4.0    | 22.0  | 0.0  |
| 21UR-31700 | 15.0   | 10.0  | 9.0    | 4.0    | 11.0  | 1.0  |
| 21UR-31710 | 37.0   | 11.0  | 21.0   | 11.0   | 16.0  | 0.0  |
| 21UR-31720 | 0.0    | 0.0   | 0.0    | 0.0    | 1.0   | 0.0  |
| 21UR-31730 | 2.0    | 1.0   | 4.0    | 0.0    | 8.0   | 0.0  |
| 21UR-31740 | 2.0    | 0.0   | 4.0    | 6.0    | 1.0   | 0.0  |



|            |        |       |       |       |       |      |
|------------|--------|-------|-------|-------|-------|------|
| 21UR-31750 | 0.0    | 0.0   | 0.0   | 0.0   | 0.0   | 0.0  |
| 21UR-31760 | 12.0   | 0.0   | 0.0   | 1.0   | 3.0   | 0.0  |
| 21UR-31770 | 0.0    | 0.0   | 0.0   | 0.0   | 0.0   | 0.0  |
| 21UR-31780 | 0.0    | 0.0   | 0.0   | 0.0   | 0.0   | 0.0  |
| 21UR-31790 | 29.0   | 4.3   | 9.0   | 5.0   | 11.0  | 1.0  |
| 21UR-3180  | 1.0    | 0.0   | 6.0   | 0.0   | 1.0   | 0.0  |
| 21UR-31800 | 80.0   | 16.0  | 49.0  | 28.0  | 20.0  | 1.0  |
| 21UR-31810 | 9.0    | 6.5   | 15.0  | 3.0   | 13.0  | 0.0  |
| 21UR-31820 | 0.0    | 0.0   | 0.0   | 0.0   | 0.0   | 0.0  |
| 21UR-31830 | 45.0   | 8.0   | 42.0  | 3.0   | 2.0   | 0.0  |
| 21UR-31840 | 1206.0 | 77.0  | 780.0 | 414.5 | 80.3  | 15.0 |
| 21UR-31850 | 0.0    | 0.0   | 0.0   | 0.0   | 0.0   | 0.0  |
| 21UR-31860 | 1.0    | 1.0   | 1.0   | 0.0   | 0.0   | 0.0  |
| 21UR-31870 | 1.0    | 2.0   | 4.0   | 0.0   | 16.5  | 1.0  |
| 21UR-31880 | 0.0    | 0.0   | 0.0   | 0.0   | 0.0   | 0.0  |
| 21UR-31890 | 351.0  | 12.0  | 323.0 | 162.0 | 18.0  | 0.0  |
| 21UR-3190  | 0.0    | 0.0   | 1.0   | 0.0   | 4.0   | 0.0  |
| 21UR-31910 | 142.0  | 14.0  | 96.0  | 41.0  | 1.0   | 1.0  |
| 21UR-31920 | 0.0    | 0.0   | 0.0   | 0.0   | 0.0   | 0.0  |
| 21UR-31930 | 0.0    | 0.0   | 0.0   | 0.0   | 0.0   | 0.0  |
| 21UR-31940 | 1.0    | 0.0   | 0.0   | 0.0   | 0.0   | 0.0  |
| 21UR-31950 | 0.0    | 0.0   | 0.0   | 0.0   | 0.0   | 0.0  |
| 21UR-31960 | 12.0   | 4.0   | 4.0   | 6.0   | 1.0   | 1.0  |
| 21UR-31970 | 11.0   | 4.0   | 11.0  | 8.0   | 12.0  | 1.0  |
| 21UR-31980 | 1.0    | 0.0   | 4.0   | 1.0   | 8.0   | 0.0  |
| 21UR-31990 | 762.0  | 25.0  | 592.0 | 161.0 | 19.0  | 4.0  |
| 21UR-320   | 7.0    | 3.0   | 1.0   | 4.0   | 7.0   | 0.0  |
| 21UR-3200  | 4.0    | 4.0   | 0.0   | 0.0   | 0.0   | 0.0  |
| 21UR-32000 | 10.0   | 4.0   | 7.0   | 1.0   | 10.0  | 1.0  |
| 21UR-32010 | 14.0   | 1.3   | 1.0   | 1.0   | 2.0   | 1.0  |
| 21UR-32020 | 1.0    | 0.1   | 0.0   | 0.0   | 0.0   | 0.0  |
| 21UR-32030 | 38.0   | 29.0  | 41.0  | 14.0  | 8.0   | 1.0  |
| 21UR-32040 | 0.0    | 0.0   | 0.0   | 0.0   | 0.0   | 0.0  |
| 21UR-32050 | 4.0    | 1.0   | 0.0   | 0.0   | 0.0   | 2.0  |
| 21UR-32060 | 0.0    | 0.0   | 1.0   | 0.0   | 0.0   | 0.0  |
| 21UR-32070 | 0.0    | 0.0   | 0.0   | 0.0   | 0.0   | 0.0  |
| 21UR-32080 | 5.0    | 0.0   | 0.0   | 0.0   | 0.0   | 0.0  |
| 21UR-32090 | 0.0    | 0.0   | 0.0   | 0.0   | 0.0   | 0.0  |
| 21UR-3210  | 1.0    | 0.0   | 0.0   | 0.0   | 0.0   | 0.0  |
| 21UR-32100 | 0.0    | 0.0   | 1.0   | 0.0   | 0.0   | 0.0  |
| 21UR-32110 | 0.0    | 0.0   | 0.0   | 0.0   | 0.0   | 0.0  |
| 21UR-32120 | 4.0    | 0.0   | 1.0   | 0.0   | 0.0   | 1.0  |
| 21UR-32130 | 197.0  | 37.0  | 214.0 | 63.0  | 37.0  | 4.0  |
| 21UR-32140 | 1.0    | 0.0   | 6.0   | 0.0   | 0.0   | 0.0  |
| 21UR-32150 | 18.0   | 8.0   | 2.0   | 4.0   | 1.0   | 1.0  |
| 21UR-32160 | 2.0    | 1.0   | 1.0   | 1.0   | 0.0   | 0.0  |
| 21UR-32170 | 0.0    | 0.0   | 0.0   | 0.0   | 0.0   | 0.0  |
| 21UR-32180 | 0.0    | 1.0   | 0.0   | 0.0   | 0.0   | 0.0  |
| 21UR-32190 | 801.7  | 109.5 | 595.0 | 339.0 | 390.0 | 4.0  |
| 21UR-3220  | 0.0    | 1.0   | 2.0   | 0.0   | 0.0   | 0.0  |
| 21UR-32200 | 10.0   | 0.0   | 13.0  | 2.0   | 8.0   | 3.0  |

|            |        |       |        |        |       |      |
|------------|--------|-------|--------|--------|-------|------|
| 21UR-32210 | 1.0    | 1.0   | 4.0    | 1.0    | 0.0   | 0.0  |
| 21UR-32220 | 0.0    | 0.0   | 0.0    | 0.0    | 0.1   | 0.0  |
| 21UR-32240 | 3017.7 | 136.0 | 2171.5 | 1041.0 | 278.2 | 9.0  |
| 21UR-32250 | 0.0    | 0.0   | 0.0    | 0.0    | 7.0   | 0.0  |
| 21UR-32260 | 0.0    | 1.0   | 1.0    | 0.0    | 4.0   | 1.0  |
| 21UR-32270 | 0.0    | 0.0   | 0.0    | 0.0    | 0.0   | 0.0  |
| 21UR-32280 | 1.0    | 0.0   | 4.0    | 4.0    | 0.0   | 1.0  |
| 21UR-32290 | 1.0    | 2.0   | 0.0    | 0.0    | 0.0   | 0.0  |
| 21UR-3230  | 4.0    | 14.0  | 9.0    | 4.0    | 10.0  | 0.0  |
| 21UR-32300 | 1.0    | 1.0   | 0.0    | 0.0    | 0.0   | 0.0  |
| 21UR-32310 | 0.0    | 0.0   | 0.0    | 0.0    | 0.0   | 0.0  |
| 21UR-32320 | 1.0    | 1.0   | 1.0    | 0.0    | 1.0   | 0.0  |
| 21UR-32330 | 1.0    | 3.0   | 0.0    | 0.0    | 1.0   | 0.0  |
| 21UR-32340 | 0.0    | 0.0   | 4.0    | 0.0    | 0.0   | 0.0  |
| 21UR-32350 | 0.0    | 1.0   | 0.0    | 0.0    | 0.0   | 0.0  |
| 21UR-32360 | 6.0    | 2.7   | 3.0    | 0.0    | 1.0   | 0.0  |
| 21UR-32370 | 0.0    | 0.0   | 0.0    | 0.0    | 0.0   | 0.0  |
| 21UR-32380 | 8.0    | 5.0   | 31.0   | 8.0    | 1.0   | 0.0  |
| 21UR-32390 | 4.0    | 25.0  | 0.0    | 1.0    | 2.0   | 0.0  |
| 21UR-3240  | 6.0    | 0.0   | 6.0    | 0.0    | 0.0   | 0.0  |
| 21UR-32400 | 0.0    | 0.0   | 0.0    | 0.0    | 0.0   | 0.0  |
| 21UR-32410 | 0.0    | 0.0   | 0.0    | 0.0    | 0.0   | 0.0  |
| 21UR-32420 | 5.0    | 5.0   | 9.0    | 6.0    | 18.0  | 2.0  |
| 21UR-32430 | 0.0    | 0.0   | 0.0    | 0.0    | 0.0   | 0.0  |
| 21UR-32440 | 0.0    | 0.0   | 0.0    | 1.0    | 1.0   | 0.0  |
| 21UR-32450 | 0.0    | 0.0   | 0.0    | 0.0    | 0.0   | 0.0  |
| 21UR-32460 | 224.0  | 18.0  | 202.3  | 78.0   | 34.0  | 3.0  |
| 21UR-32470 | 0.0    | 0.0   | 0.0    | 0.0    | 0.0   | 0.0  |
| 21UR-32480 | 1.0    | 19.0  | 8.0    | 0.0    | 12.0  | 1.0  |
| 21UR-32490 | 0.0    | 0.0   | 0.0    | 0.0    | 0.0   | 0.0  |
| 21UR-3250  | 0.0    | 0.0   | 0.0    | 0.0    | 0.0   | 0.0  |
| 21UR-32500 | 1.0    | 0.0   | 1.0    | 1.0    | 1.0   | 0.0  |
| 21UR-32510 | 1.0    | 1.0   | 0.0    | 0.0    | 0.0   | 0.0  |
| 21UR-32520 | 2.0    | 0.0   | 0.0    | 0.0    | 2.0   | 0.0  |
| 21UR-32530 | 0.0    | 1.0   | 0.0    | 0.0    | 0.0   | 1.0  |
| 21UR-32540 | 4.0    | 28.0  | 0.0    | 0.0    | 29.0  | 0.0  |
| 21UR-32550 | 0.0    | 1.0   | 1.0    | 0.0    | 0.0   | 0.0  |
| 21UR-32560 | 0.0    | 0.0   | 0.0    | 0.0    | 0.0   | 0.0  |
| 21UR-32570 | 0.0    | 1.0   | 1.0    | 0.0    | 0.0   | 0.0  |
| 21UR-32580 | 0.0    | 0.0   | 1.0    | 0.0    | 0.0   | 0.0  |
| 21UR-32590 | 0.0    | 0.0   | 1.0    | 0.0    | 4.0   | 0.0  |
| 21UR-3260  | 111.0  | 38.0  | 74.0   | 33.0   | 24.0  | 12.0 |
| 21UR-32600 | 367.3  | 191.5 | 358.8  | 113.0  | 208.3 | 25.0 |
| 21UR-32610 | 0.0    | 0.0   | 1.0    | 0.0    | 1.0   | 0.0  |
| 21UR-32620 | 10.0   | 10.0  | 12.0   | 0.0    | 21.0  | 0.0  |
| 21UR-32630 | 62.0   | 5.0   | 40.0   | 11.0   | 16.0  | 3.0  |
| 21UR-32640 | 0.0    | 0.0   | 0.0    | 0.0    | 0.0   | 0.0  |
| 21UR-32650 | 0.0    | 0.0   | 0.0    | 0.0    | 0.0   | 0.0  |
| 21UR-32660 | 0.0    | 2.0   | 0.0    | 0.0    | 0.0   | 0.0  |
| 21UR-32670 | 1.0    | 0.0   | 8.0    | 1.0    | 6.0   | 0.0  |
| 21UR-32680 | 3.7    | 0.0   | 2.0    | 0.0    | 0.0   | 1.0  |

|            |        |       |       |       |       |      |
|------------|--------|-------|-------|-------|-------|------|
| 21UR-32690 | 22.0   | 5.0   | 4.0   | 1.0   | 9.0   | 5.0  |
| 21UR-3270  | 1.0    | 0.0   | 0.0   | 0.0   | 0.0   | 0.0  |
| 21UR-32700 | 10.0   | 1.0   | 0.0   | 4.0   | 2.0   | 0.0  |
| 21UR-32710 | 0.0    | 0.0   | 0.0   | 0.0   | 3.0   | 4.0  |
| 21UR-32720 | 1019.8 | 77.0  | 762.0 | 443.5 | 116.0 | 13.0 |
| 21UR-32730 | 1.0    | 1.0   | 0.0   | 0.0   | 0.0   | 1.0  |
| 21UR-32740 | 0.0    | 2.0   | 0.0   | 0.0   | 10.0  | 2.0  |
| 21UR-32750 | 0.0    | 0.0   | 0.0   | 0.0   | 0.0   | 0.0  |
| 21UR-32760 | 28.0   | 0.0   | 17.0  | 6.0   | 1.0   | 0.0  |
| 21UR-32770 | 97.0   | 24.0  | 67.0  | 35.5  | 21.0  | 1.0  |
| 21UR-32780 | 0.0    | 0.0   | 1.0   | 0.0   | 0.0   | 1.0  |
| 21UR-32790 | 0.0    | 1.0   | 1.0   | 0.0   | 4.0   | 0.0  |
| 21UR-3280  | 0.0    | 0.0   | 0.0   | 0.0   | 0.0   | 0.0  |
| 21UR-32800 | 0.0    | 4.0   | 0.0   | 0.0   | 0.0   | 0.0  |
| 21UR-32810 | 0.0    | 0.0   | 0.0   | 0.0   | 6.0   | 0.0  |
| 21UR-32820 | 55.0   | 5.0   | 45.0  | 28.0  | 8.0   | 6.0  |
| 21UR-32840 | 0.0    | 0.0   | 0.0   | 0.0   | 0.0   | 0.0  |
| 21UR-32850 | 0.0    | 5.0   | 0.0   | 0.0   | 0.0   | 0.0  |
| 21UR-32860 | 0.0    | 0.0   | 0.0   | 0.0   | 0.0   | 0.0  |
| 21UR-32870 | 0.0    | 0.0   | 0.0   | 0.0   | 0.0   | 0.0  |
| 21UR-32880 | 0.0    | 6.0   | 0.0   | 0.0   | 9.0   | 1.0  |
| 21UR-32890 | 4.0    | 0.0   | 0.0   | 0.0   | 0.0   | 0.0  |
| 21UR-3290  | 0.0    | 0.0   | 1.0   | 0.0   | 1.3   | 0.0  |
| 21UR-32900 | 0.0    | 0.0   | 0.0   | 0.0   | 1.0   | 0.0  |
| 21UR-32910 | 1.0    | 0.0   | 1.0   | 0.0   | 1.0   | 0.0  |
| 21UR-32920 | 183.0  | 28.0  | 165.0 | 101.0 | 30.0  | 4.0  |
| 21UR-32930 | 0.0    | 0.0   | 0.0   | 0.0   | 1.0   | 0.0  |
| 21UR-32940 | 1.0    | 0.0   | 0.0   | 0.0   | 1.0   | 0.0  |
| 21UR-32950 | 0.0    | 1.0   | 4.0   | 0.0   | 0.0   | 0.0  |
| 21UR-32960 | 6.0    | 1.0   | 0.0   | 1.0   | 1.0   | 1.0  |
| 21UR-32970 | 0.0    | 0.0   | 0.0   | 0.0   | 0.0   | 0.0  |
| 21UR-32980 | 0.0    | 1.0   | 0.0   | 0.0   | 1.0   | 0.0  |
| 21UR-32990 | 24.0   | 12.0  | 24.0  | 10.0  | 20.0  | 0.0  |
| 21UR-330   | 0.0    | 0.0   | 0.0   | 0.0   | 0.0   | 0.0  |
| 21UR-3300  | 112.0  | 11.0  | 88.0  | 65.0  | 38.0  | 6.0  |
| 21UR-33000 | 8.0    | 1.0   | 5.0   | 4.0   | 2.0   | 0.0  |
| 21UR-33010 | 0.0    | 0.0   | 0.0   | 0.0   | 0.0   | 0.0  |
| 21UR-33020 | 59.0   | 5.1   | 32.0  | 7.0   | 3.0   | 1.5  |
| 21UR-33030 | 0.0    | 0.0   | 0.0   | 0.0   | 0.0   | 0.0  |
| 21UR-33040 | 6.0    | 1.0   | 4.0   | 0.0   | 0.0   | 0.0  |
| 21UR-33050 | 11.0   | 6.0   | 10.0  | 7.0   | 8.0   | 0.0  |
| 21UR-33060 | 0.0    | 1.0   | 2.0   | 0.0   | 0.0   | 0.0  |
| 21UR-33070 | 0.0    | 0.0   | 0.0   | 0.0   | 0.0   | 0.0  |
| 21UR-33080 | 6.0    | 6.0   | 6.0   | 0.0   | 0.0   | 1.0  |
| 21UR-33090 | 0.0    | 1.0   | 1.0   | 0.0   | 9.0   | 0.0  |
| 21UR-3310  | 0.0    | 0.0   | 4.0   | 0.0   | 1.0   | 0.0  |
| 21UR-33100 | 0.0    | 7.1   | 15.0  | 1.0   | 3.0   | 1.0  |
| 21UR-33110 | 116.0  | 20.0  | 126.0 | 88.3  | 96.0  | 6.0  |
| 21UR-33120 | 958.5  | 104.9 | 886.0 | 476.7 | 164.7 | 12.4 |
| 21UR-33130 | 0.0    | 0.0   | 0.0   | 0.0   | 0.0   | 0.0  |
| 21UR-33140 | 0.0    | 0.0   | 0.0   | 0.0   | 0.0   | 0.0  |

|            |       |       |       |       |       |      |
|------------|-------|-------|-------|-------|-------|------|
| 21UR-33150 | 0.0   | 0.0   | 0.0   | 0.0   | 0.0   | 0.0  |
| 21UR-33160 | 4.0   | 49.0  | 8.0   | 0.0   | 55.0  | 0.0  |
| 21UR-33170 | 92.0  | 17.0  | 85.0  | 35.0  | 36.0  | 4.0  |
| 21UR-33180 | 0.0   | 0.0   | 0.0   | 0.0   | 0.0   | 0.0  |
| 21UR-33190 | 8.0   | 1.0   | 10.0  | 1.0   | 6.0   | 4.0  |
| 21UR-3320  | 0.0   | 10.0  | 6.0   | 0.0   | 7.0   | 1.0  |
| 21UR-33200 | 9.0   | 6.0   | 16.0  | 2.0   | 16.0  | 1.0  |
| 21UR-33210 | 8.0   | 4.0   | 20.0  | 4.0   | 16.0  | 0.0  |
| 21UR-33220 | 1.0   | 5.0   | 1.0   | 0.0   | 1.0   | 1.0  |
| 21UR-33230 | 36.0  | 5.0   | 13.0  | 5.5   | 10.0  | 0.0  |
| 21UR-33240 | 67.0  | 12.0  | 44.5  | 16.0  | 10.0  | 5.0  |
| 21UR-33250 | 0.0   | 1.0   | 0.0   | 0.0   | 3.0   | 0.0  |
| 21UR-33260 | 2.0   | 0.0   | 1.0   | 0.0   | 0.0   | 0.0  |
| 21UR-33270 | 1.0   | 14.0  | 7.0   | 0.0   | 15.0  | 0.0  |
| 21UR-33290 | 1.0   | 0.0   | 3.0   | 0.0   | 3.5   | 0.0  |
| 21UR-3330  | 1.0   | 0.0   | 0.0   | 0.0   | 0.0   | 0.0  |
| 21UR-33300 | 81.0  | 35.0  | 70.0  | 8.0   | 22.0  | 4.0  |
| 21UR-33310 | 0.0   | 0.0   | 0.0   | 0.0   | 0.0   | 0.0  |
| 21UR-33320 | 0.0   | 0.0   | 0.0   | 0.0   | 0.0   | 0.0  |
| 21UR-33330 | 0.0   | 0.0   | 0.0   | 0.0   | 0.0   | 1.0  |
| 21UR-33340 | 0.0   | 0.0   | 0.0   | 0.0   | 1.0   | 0.0  |
| 21UR-33350 | 1.0   | 3.0   | 0.0   | 1.0   | 8.0   | 1.0  |
| 21UR-33360 | 338.0 | 102.0 | 311.0 | 174.0 | 408.3 | 10.0 |
| 21UR-33370 | 0.0   | 1.0   | 0.0   | 0.0   | 1.0   | 0.0  |
| 21UR-33380 | 0.0   | 0.0   | 0.0   | 0.0   | 0.0   | 0.0  |
| 21UR-33390 | 999.5 | 36.0  | 735.0 | 142.0 | 47.0  | 3.0  |
| 21UR-3340  | 4.0   | 0.0   | 4.0   | 1.0   | 4.0   | 1.0  |
| 21UR-33400 | 1.0   | 0.0   | 0.0   | 0.0   | 0.0   | 0.0  |
| 21UR-33410 | 1.0   | 0.0   | 1.0   | 1.0   | 1.0   | 0.0  |
| 21UR-33420 | 0.0   | 4.0   | 1.0   | 0.0   | 1.0   | 0.0  |
| 21UR-33430 | 2.0   | 3.0   | 0.0   | 1.0   | 5.0   | 4.0  |
| 21UR-33440 | 0.0   | 0.0   | 4.0   | 0.0   | 0.0   | 0.0  |
| 21UR-33450 | 79.0  | 33.0  | 91.3  | 32.0  | 74.0  | 5.0  |
| 21UR-33460 | 0.0   | 0.0   | 0.0   | 0.0   | 0.0   | 0.0  |
| 21UR-33470 | 0.0   | 4.0   | 0.0   | 0.0   | 0.0   | 0.0  |
| 21UR-33480 | 1.0   | 0.0   | 8.0   | 0.0   | 1.0   | 4.0  |
| 21UR-33490 | 0.0   | 0.0   | 1.0   | 0.0   | 0.0   | 0.0  |
| 21UR-3350  | 1.0   | 3.0   | 2.0   | 0.0   | 1.0   | 0.0  |
| 21UR-33500 | 6.0   | 0.0   | 1.0   | 0.0   | 0.0   | 0.0  |
| 21UR-33510 | 10.0  | 0.0   | 1.0   | 1.0   | 0.0   | 0.0  |
| 21UR-33520 | 6.0   | 2.0   | 0.0   | 0.0   | 3.0   | 0.0  |
| 21UR-33530 | 0.0   | 1.0   | 0.0   | 0.0   | 0.0   | 0.0  |
| 21UR-33540 | 0.0   | 0.0   | 0.0   | 0.0   | 0.0   | 0.0  |
| 21UR-33550 | 0.0   | 0.0   | 0.0   | 0.0   | 0.0   | 0.0  |
| 21UR-33560 | 0.0   | 0.0   | 0.0   | 0.0   | 0.0   | 0.0  |
| 21UR-33570 | 4.0   | 4.0   | 13.0  | 1.0   | 4.0   | 0.0  |
| 21UR-33580 | 0.0   | 7.0   | 1.0   | 0.0   | 0.0   | 1.0  |
| 21UR-33590 | 1.0   | 0.0   | 0.0   | 0.0   | 3.0   | 0.0  |
| 21UR-3360  | 1.0   | 0.0   | 0.0   | 0.0   | 0.0   | 0.0  |
| 21UR-33600 | 27.0  | 56.0  | 36.0  | 8.0   | 208.0 | 5.0  |
| 21UR-33610 | 0.0   | 0.0   | 0.0   | 0.0   | 0.0   | 0.0  |

|            |       |       |       |       |       |      |
|------------|-------|-------|-------|-------|-------|------|
| 21UR-33620 | 0.0   | 0.0   | 0.0   | 0.0   | 0.0   | 0.0  |
| 21UR-33630 | 127.0 | 29.2  | 80.0  | 46.0  | 14.0  | 3.0  |
| 21UR-33640 | 0.0   | 0.0   | 0.0   | 0.0   | 0.0   | 0.0  |
| 21UR-33650 | 0.0   | 2.0   | 0.0   | 0.0   | 1.0   | 0.0  |
| 21UR-33660 | 10.0  | 5.0   | 11.0  | 9.0   | 11.0  | 0.0  |
| 21UR-33670 | 0.0   | 2.0   | 0.0   | 0.0   | 1.0   | 0.0  |
| 21UR-33680 | 0.0   | 1.0   | 0.0   | 0.0   | 0.0   | 0.0  |
| 21UR-33690 | 0.0   | 0.0   | 0.0   | 0.0   | 0.0   | 0.0  |
| 21UR-3370  | 10.0  | 0.0   | 1.0   | 0.0   | 0.0   | 0.0  |
| 21UR-33700 | 1.0   | 2.0   | 0.0   | 0.0   | 0.0   | 0.0  |
| 21UR-33710 | 9.0   | 9.0   | 9.0   | 0.0   | 8.0   | 3.0  |
| 21UR-33720 | 0.0   | 0.0   | 2.0   | 0.0   | 0.0   | 0.0  |
| 21UR-33730 | 0.0   | 0.0   | 0.0   | 0.0   | 0.0   | 0.0  |
| 21UR-33740 | 1.0   | 0.0   | 0.0   | 0.0   | 1.0   | 0.0  |
| 21UR-33750 | 189.0 | 242.0 | 244.0 | 134.0 | 166.0 | 31.0 |
| 21UR-33760 | 5.0   | 3.0   | 6.0   | 0.0   | 6.0   | 0.0  |
| 21UR-33770 | 0.0   | 0.0   | 0.0   | 0.0   | 0.0   | 0.0  |
| 21UR-33780 | 12.0  | 1.0   | 10.0  | 1.0   | 5.0   | 1.0  |
| 21UR-33790 | 8.0   | 2.0   | 1.0   | 0.0   | 0.0   | 0.0  |
| 21UR-3380  | 0.0   | 0.0   | 1.0   | 0.0   | 0.0   | 0.0  |
| 21UR-33800 | 6.0   | 8.0   | 5.0   | 0.0   | 4.0   | 0.0  |
| 21UR-33810 | 131.0 | 53.0  | 123.0 | 34.0  | 18.5  | 6.0  |
| 21UR-33820 | 0.0   | 0.0   | 1.0   | 0.0   | 4.0   | 1.0  |
| 21UR-33830 | 0.0   | 0.0   | 0.0   | 0.0   | 0.0   | 0.0  |
| 21UR-33840 | 1.0   | 0.0   | 0.0   | 0.0   | 0.0   | 0.0  |
| 21UR-33850 | 0.0   | 0.0   | 0.0   | 0.0   | 0.0   | 0.0  |
| 21UR-33860 | 0.0   | 0.0   | 0.0   | 0.0   | 0.0   | 0.0  |
| 21UR-33870 | 184.0 | 46.0  | 219.0 | 45.0  | 27.5  | 4.0  |
| 21UR-33880 | 51.0  | 20.0  | 29.0  | 13.0  | 18.0  | 0.0  |
| 21UR-33890 | 0.0   | 0.0   | 0.0   | 0.0   | 0.0   | 0.0  |
| 21UR-3390  | 1.0   | 0.0   | 1.0   | 0.0   | 1.0   | 0.0  |
| 21UR-33900 | 0.0   | 0.0   | 0.0   | 0.0   | 0.0   | 0.0  |
| 21UR-33910 | 1.0   | 0.0   | 4.0   | 0.0   | 6.0   | 0.0  |
| 21UR-33920 | 14.0  | 0.0   | 15.0  | 5.0   | 9.0   | 0.0  |
| 21UR-33930 | 0.0   | 10.0  | 0.0   | 0.0   | 4.0   | 0.0  |
| 21UR-33940 | 6.0   | 1.0   | 4.0   | 0.0   | 4.0   | 0.0  |
| 21UR-33950 | 16.0  | 12.0  | 10.0  | 6.0   | 49.1  | 0.0  |
| 21UR-33960 | 0.0   | 0.0   | 0.0   | 0.0   | 0.0   | 0.0  |
| 21UR-33970 | 0.0   | 0.0   | 0.0   | 0.0   | 0.0   | 0.0  |
| 21UR-33980 | 0.0   | 0.0   | 0.0   | 0.0   | 0.0   | 0.0  |
| 21UR-33990 | 132.0 | 8.0   | 136.0 | 45.0  | 22.0  | 0.0  |
| 21UR-340   | 213.0 | 15.0  | 110.0 | 65.0  | 16.0  | 1.0  |
| 21UR-3400  | 0.0   | 0.0   | 0.0   | 0.0   | 0.0   | 0.0  |
| 21UR-34000 | 0.0   | 0.0   | 0.0   | 0.0   | 0.0   | 0.0  |
| 21UR-34010 | 1.0   | 2.0   | 0.0   | 0.0   | 0.0   | 0.3  |
| 21UR-34020 | 8.0   | 19.0  | 10.0  | 4.0   | 15.0  | 0.0  |
| 21UR-34030 | 0.0   | 0.0   | 0.0   | 0.0   | 0.0   | 0.0  |
| 21UR-34040 | 0.0   | 1.0   | 0.0   | 0.0   | 0.0   | 0.0  |
| 21UR-34050 | 68.0  | 16.0  | 21.0  | 6.0   | 8.0   | 2.0  |
| 21UR-34060 | 0.0   | 0.0   | 1.0   | 0.0   | 0.0   | 0.0  |
| 21UR-34070 | 2.0   | 4.0   | 11.0  | 9.0   | 8.0   | 0.0  |

|            |       |      |       |      |      |     |
|------------|-------|------|-------|------|------|-----|
| 21UR-34080 | 0.0   | 0.0  | 0.0   | 0.0  | 0.0  | 0.0 |
| 21UR-34090 | 0.0   | 0.0  | 0.0   | 0.0  | 0.0  | 0.0 |
| 21UR-3410  | 1.0   | 16.0 | 0.0   | 0.0  | 9.0  | 0.0 |
| 21UR-34100 | 0.0   | 0.3  | 0.0   | 0.0  | 0.0  | 0.0 |
| 21UR-34110 | 38.0  | 7.0  | 26.0  | 14.0 | 16.0 | 1.0 |
| 21UR-34120 | 26.0  | 10.0 | 12.0  | 4.0  | 8.0  | 1.0 |
| 21UR-34130 | 1.0   | 0.0  | 1.0   | 0.0  | 1.0  | 0.0 |
| 21UR-34140 | 5.0   | 2.0  | 0.0   | 0.0  | 4.0  | 0.0 |
| 21UR-34150 | 6.0   | 1.0  | 0.0   | 0.0  | 0.0  | 1.0 |
| 21UR-34160 | 1.0   | 0.0  | 0.0   | 0.0  | 0.0  | 0.0 |
| 21UR-34170 | 8.0   | 6.0  | 7.0   | 7.0  | 12.0 | 0.0 |
| 21UR-34180 | 4.0   | 2.0  | 1.0   | 1.0  | 0.0  | 6.0 |
| 21UR-34190 | 0.0   | 0.0  | 0.0   | 0.0  | 0.0  | 0.0 |
| 21UR-34200 | 0.0   | 0.0  | 0.0   | 0.0  | 0.0  | 0.0 |
| 21UR-34210 | 9.0   | 10.0 | 9.0   | 8.0  | 1.0  | 0.0 |
| 21UR-34220 | 4.0   | 1.0  | 2.0   | 0.0  | 2.0  | 1.0 |
| 21UR-34230 | 1.0   | 1.0  | 0.0   | 0.0  | 1.0  | 0.0 |
| 21UR-34240 | 9.0   | 7.0  | 19.0  | 4.0  | 4.0  | 6.0 |
| 21UR-34250 | 0.0   | 1.0  | 0.0   | 0.0  | 1.0  | 0.5 |
| 21UR-34260 | 0.0   | 0.0  | 0.0   | 0.0  | 0.0  | 0.0 |
| 21UR-34270 | 7.0   | 0.0  | 4.0   | 0.0  | 0.0  | 0.0 |
| 21UR-34280 | 0.0   | 0.0  | 0.0   | 0.0  | 0.0  | 0.0 |
| 21UR-34290 | 1.0   | 5.0  | 3.0   | 0.0  | 1.0  | 2.0 |
| 21UR-3430  | 1.0   | 1.0  | 0.0   | 0.0  | 1.0  | 0.0 |
| 21UR-34300 | 150.0 | 25.0 | 113.0 | 40.0 | 13.0 | 4.0 |
| 21UR-34310 | 3.5   | 17.0 | 4.0   | 0.0  | 5.0  | 4.0 |
| 21UR-34320 | 0.0   | 0.0  | 1.0   | 0.0  | 1.0  | 0.0 |
| 21UR-34330 | 0.0   | 0.0  | 0.0   | 0.0  | 0.0  | 0.3 |
| 21UR-34340 | 4.0   | 0.0  | 2.0   | 0.0  | 7.0  | 0.0 |
| 21UR-34350 | 0.0   | 0.0  | 0.0   | 0.0  | 0.0  | 0.0 |
| 21UR-34360 | 5.0   | 3.0  | 0.0   | 0.0  | 1.0  | 0.0 |
| 21UR-34370 | 8.0   | 0.0  | 4.0   | 0.0  | 0.0  | 0.0 |
| 21UR-34380 | 20.0  | 2.0  | 8.0   | 6.0  | 20.0 | 0.0 |
| 21UR-34390 | 13.0  | 39.8 | 11.0  | 6.0  | 1.0  | 0.0 |
| 21UR-3440  | 0.0   | 7.0  | 0.0   | 0.0  | 1.0  | 4.0 |
| 21UR-34400 | 26.0  | 3.0  | 14.0  | 7.0  | 8.0  | 1.0 |
| 21UR-34410 | 0.0   | 0.0  | 0.0   | 0.0  | 0.0  | 0.0 |
| 21UR-34420 | 84.0  | 56.0 | 74.0  | 28.0 | 36.0 | 2.0 |
| 21UR-34430 | 0.0   | 0.0  | 0.0   | 0.0  | 1.0  | 0.0 |
| 21UR-34440 | 0.0   | 0.0  | 0.0   | 0.0  | 0.0  | 0.0 |
| 21UR-34450 | 0.0   | 0.0  | 0.0   | 0.0  | 0.0  | 0.0 |
| 21UR-34460 | 16.0  | 2.0  | 14.0  | 0.0  | 1.0  | 0.0 |
| 21UR-34470 | 0.0   | 0.0  | 0.0   | 1.0  | 0.0  | 0.0 |
| 21UR-34480 | 20.0  | 10.0 | 21.0  | 3.0  | 0.0  | 2.0 |
| 21UR-34490 | 0.0   | 6.0  | 0.0   | 0.0  | 6.0  | 0.0 |
| 21UR-3450  | 1.0   | 1.0  | 0.0   | 0.0  | 0.0  | 0.0 |
| 21UR-34500 | 0.0   | 0.0  | 0.0   | 0.0  | 0.0  | 0.2 |
| 21UR-34510 | 10.0  | 3.0  | 13.0  | 8.0  | 3.0  | 0.0 |
| 21UR-34520 | 0.0   | 0.0  | 1.0   | 0.0  | 0.0  | 0.0 |
| 21UR-34530 | 3.0   | 0.0  | 6.0   | 1.0  | 0.0  | 0.0 |
| 21UR-34540 | 2.0   | 0.0  | 0.0   | 0.0  | 1.0  | 0.0 |

|            |        |       |       |       |       |      |
|------------|--------|-------|-------|-------|-------|------|
| 21UR-34550 | 1.0    | 0.0   | 3.0   | 0.0   | 1.0   | 0.0  |
| 21UR-34560 | 0.0    | 0.0   | 0.0   | 0.0   | 0.0   | 1.0  |
| 21UR-34570 | 1.0    | 0.0   | 0.0   | 0.0   | 0.0   | 0.0  |
| 21UR-34580 | 0.0    | 1.0   | 4.0   | 1.0   | 10.0  | 1.0  |
| 21UR-34590 | 1.0    | 3.0   | 1.0   | 1.0   | 8.0   | 1.0  |
| 21UR-3460  | 0.0    | 0.0   | 1.0   | 0.0   | 0.0   | 0.0  |
| 21UR-34600 | 0.0    | 4.0   | 0.0   | 0.0   | 1.0   | 0.0  |
| 21UR-34610 | 0.0    | 2.0   | 0.0   | 0.0   | 0.0   | 0.0  |
| 21UR-34620 | 8.0    | 0.0   | 10.0  | 1.0   | 3.0   | 0.0  |
| 21UR-34630 | 11.0   | 6.0   | 4.0   | 1.0   | 48.5  | 6.0  |
| 21UR-34640 | 1.0    | 0.0   | 1.0   | 0.0   | 0.0   | 0.0  |
| 21UR-34650 | 1.0    | 0.0   | 1.0   | 0.0   | 0.0   | 0.0  |
| 21UR-34660 | 5.0    | 1.0   | 1.0   | 3.0   | 3.0   | 0.0  |
| 21UR-34670 | 1.0    | 0.0   | 0.0   | 0.0   | 0.0   | 0.0  |
| 21UR-34680 | 105.0  | 26.0  | 61.0  | 21.0  | 63.0  | 4.0  |
| 21UR-34690 | 6.0    | 9.0   | 3.0   | 6.0   | 14.0  | 0.0  |
| 21UR-3470  | 0.0    | 0.0   | 0.0   | 0.0   | 0.0   | 0.0  |
| 21UR-34700 | 1142.5 | 115.5 | 889.0 | 500.0 | 192.0 | 12.0 |
| 21UR-34710 | 243.5  | 47.0  | 204.5 | 96.0  | 12.0  | 7.0  |
| 21UR-34720 | 0.0    | 0.0   | 0.0   | 0.0   | 0.0   | 0.0  |
| 21UR-34730 | 1.0    | 3.0   | 2.0   | 0.0   | 11.5  | 1.0  |
| 21UR-34740 | 0.0    | 0.0   | 0.0   | 0.0   | 0.0   | 1.0  |
| 21UR-34750 | 0.0    | 0.0   | 0.0   | 0.0   | 0.0   | 0.0  |
| 21UR-34760 | 0.0    | 0.0   | 0.0   | 0.0   | 0.0   | 0.0  |
| 21UR-34770 | 0.0    | 0.0   | 0.0   | 0.0   | 0.0   | 0.0  |
| 21UR-34780 | 0.0    | 1.0   | 0.0   | 0.0   | 0.0   | 0.0  |
| 21UR-34790 | 1.0    | 0.0   | 0.0   | 0.0   | 0.0   | 0.0  |
| 21UR-3480  | 25.0   | 1.0   | 10.0  | 6.0   | 1.0   | 1.0  |
| 21UR-34800 | 1.0    | 0.0   | 1.0   | 0.0   | 0.0   | 0.0  |
| 21UR-34810 | 0.0    | 1.0   | 0.0   | 0.0   | 0.0   | 0.0  |
| 21UR-34820 | 0.0    | 0.0   | 0.0   | 0.0   | 0.0   | 0.0  |
| 21UR-34830 | 30.0   | 8.2   | 15.0  | 4.0   | 7.0   | 0.0  |
| 21UR-34840 | 0.0    | 2.0   | 0.0   | 0.0   | 0.0   | 0.0  |
| 21UR-34850 | 0.0    | 0.0   | 0.0   | 0.0   | 4.0   | 0.0  |
| 21UR-34860 | 0.0    | 0.0   | 0.0   | 0.0   | 0.0   | 0.0  |
| 21UR-34870 | 7.0    | 11.0  | 8.0   | 0.0   | 1.0   | 0.0  |
| 21UR-34880 | 0.0    | 0.0   | 0.0   | 0.0   | 0.0   | 0.0  |
| 21UR-34890 | 4.0    | 0.0   | 0.0   | 1.0   | 1.0   | 0.0  |
| 21UR-3490  | 0.0    | 0.0   | 0.0   | 0.0   | 0.0   | 0.0  |
| 21UR-34900 | 0.0    | 0.0   | 1.0   | 0.0   | 0.0   | 0.0  |
| 21UR-34920 | 4.0    | 1.0   | 1.0   | 0.0   | 4.0   | 3.0  |
| 21UR-34930 | 0.0    | 0.0   | 1.0   | 0.0   | 0.0   | 0.0  |
| 21UR-34940 | 0.0    | 0.0   | 0.0   | 0.0   | 2.0   | 0.0  |
| 21UR-34950 | 0.0    | 6.0   | 0.0   | 0.0   | 0.0   | 0.0  |
| 21UR-34960 | 0.0    | 0.0   | 0.0   | 0.0   | 0.0   | 0.0  |
| 21UR-34970 | 35.0   | 7.0   | 32.0  | 9.0   | 38.0  | 4.0  |
| 21UR-34980 | 6.0    | 2.0   | 1.0   | 0.0   | 0.0   | 0.0  |
| 21UR-34990 | 1.0    | 0.0   | 0.0   | 0.0   | 0.0   | 0.0  |
| 21UR-350   | 25.0   | 17.0  | 23.0  | 12.0  | 7.0   | 0.0  |
| 21UR-3500  | 0.0    | 0.0   | 0.0   | 0.0   | 0.0   | 0.0  |
| 21UR-35000 | 0.0    | 0.0   | 0.0   | 0.0   | 0.0   | 4.0  |

|            |       |      |       |      |       |      |
|------------|-------|------|-------|------|-------|------|
| 21UR-35010 | 69.0  | 9.0  | 46.0  | 18.0 | 5.0   | 3.0  |
| 21UR-35020 | 409.0 | 46.0 | 253.3 | 71.0 | 128.6 | 14.0 |
| 21UR-35030 | 1.0   | 8.0  | 4.0   | 0.0  | 0.0   | 1.0  |
| 21UR-35040 | 0.0   | 0.0  | 0.0   | 0.0  | 0.0   | 0.0  |
| 21UR-35050 | 12.0  | 4.0  | 16.0  | 1.0  | 10.0  | 0.0  |
| 21UR-35060 | 0.0   | 2.1  | 0.0   | 0.0  | 0.0   | 0.0  |
| 21UR-35070 | 1.0   | 0.0  | 0.0   | 0.0  | 0.0   | 0.0  |
| 21UR-35080 | 0.0   | 0.0  | 0.0   | 0.0  | 1.0   | 0.0  |
| 21UR-35090 | 33.0  | 2.3  | 17.0  | 18.0 | 0.0   | 0.0  |
| 21UR-3510  | 0.0   | 0.0  | 0.0   | 0.0  | 0.0   | 0.0  |
| 21UR-35100 | 0.0   | 0.0  | 0.0   | 0.0  | 0.0   | 0.0  |
| 21UR-35110 | 28.0  | 19.0 | 35.0  | 7.0  | 34.0  | 3.0  |
| 21UR-35120 | 0.0   | 0.0  | 0.0   | 0.0  | 0.0   | 0.0  |
| 21UR-35130 | 1.0   | 0.0  | 6.0   | 1.0  | 2.0   | 0.0  |
| 21UR-35140 | 5.0   | 7.0  | 9.0   | 0.0  | 29.5  | 0.0  |
| 21UR-35150 | 0.0   | 1.0  | 6.0   | 0.0  | 0.0   | 1.0  |
| 21UR-35160 | 0.0   | 0.0  | 0.0   | 0.0  | 0.0   | 0.1  |
| 21UR-35170 | 0.0   | 0.0  | 0.0   | 0.0  | 0.0   | 0.0  |
| 21UR-35180 | 0.0   | 1.0  | 0.0   | 0.0  | 1.0   | 0.0  |
| 21UR-35190 | 0.0   | 0.0  | 0.0   | 0.0  | 0.0   | 0.0  |
| 21UR-35200 | 7.0   | 0.0  | 1.0   | 1.0  | 0.0   | 0.0  |
| 21UR-35210 | 6.0   | 4.0  | 2.0   | 0.0  | 0.0   | 0.0  |
| 21UR-35220 | 233.0 | 35.0 | 173.5 | 54.0 | 20.0  | 4.0  |
| 21UR-35230 | 5.0   | 19.0 | 3.0   | 6.0  | 37.0  | 8.0  |
| 21UR-35240 | 0.0   | 0.0  | 0.0   | 0.0  | 0.0   | 0.0  |
| 21UR-35250 | 0.0   | 1.0  | 0.0   | 0.0  | 1.0   | 1.0  |
| 21UR-35260 | 4.0   | 0.0  | 1.0   | 0.0  | 0.0   | 0.0  |
| 21UR-35270 | 45.0  | 9.0  | 30.0  | 19.0 | 2.0   | 0.0  |
| 21UR-35280 | 0.0   | 0.0  | 0.0   | 0.0  | 0.0   | 0.0  |
| 21UR-35290 | 0.0   | 0.0  | 0.0   | 0.0  | 0.0   | 0.0  |
| 21UR-3530  | 5.0   | 0.0  | 8.0   | 0.0  | 4.0   | 0.0  |
| 21UR-35300 | 183.0 | 56.0 | 173.0 | 43.0 | 113.7 | 7.0  |
| 21UR-35310 | 5.0   | 2.0  | 0.0   | 0.0  | 1.0   | 0.0  |
| 21UR-35320 | 32.0  | 9.0  | 37.0  | 12.0 | 1.0   | 4.0  |
| 21UR-35330 | 3.0   | 2.0  | 5.0   | 1.0  | 1.0   | 1.0  |
| 21UR-35340 | 4.0   | 1.0  | 6.0   | 4.0  | 0.0   | 0.0  |
| 21UR-35350 | 0.0   | 0.0  | 0.0   | 0.0  | 0.0   | 0.0  |
| 21UR-35360 | 5.0   | 0.0  | 3.0   | 8.0  | 0.0   | 0.0  |
| 21UR-35370 | 4.0   | 1.0  | 3.0   | 4.0  | 2.0   | 0.0  |
| 21UR-35380 | 12.0  | 1.0  | 1.0   | 4.0  | 1.0   | 0.0  |
| 21UR-35390 | 24.0  | 29.1 | 17.0  | 8.0  | 31.0  | 4.0  |
| 21UR-35400 | 12.0  | 25.0 | 4.0   | 8.0  | 36.0  | 3.0  |
| 21UR-35410 | 18.0  | 0.0  | 17.0  | 0.0  | 0.0   | 0.0  |
| 21UR-35420 | 39.0  | 4.1  | 20.0  | 14.0 | 1.0   | 0.0  |
| 21UR-35430 | 0.0   | 0.0  | 0.0   | 0.0  | 0.0   | 0.0  |
| 21UR-35440 | 0.0   | 0.0  | 1.0   | 0.0  | 1.0   | 0.0  |
| 21UR-35450 | 1.0   | 0.0  | 0.0   | 0.0  | 4.0   | 0.0  |
| 21UR-35460 | 0.0   | 0.0  | 0.0   | 0.0  | 0.0   | 0.0  |
| 21UR-35470 | 25.0  | 7.7  | 22.0  | 6.0  | 4.0   | 0.0  |
| 21UR-35480 | 4.0   | 0.0  | 2.0   | 0.0  | 0.0   | 0.0  |
| 21UR-3550  | 0.0   | 0.0  | 6.0   | 1.0  | 1.0   | 0.0  |



|            |         |       |        |        |       |      |
|------------|---------|-------|--------|--------|-------|------|
| 21UR-35500 | 6.0     | 1.0   | 9.0    | 1.0    | 0.0   | 0.0  |
| 21UR-35510 | 4.0     | 6.0   | 9.0    | 8.0    | 12.0  | 0.0  |
| 21UR-35520 | 13.0    | 0.3   | 2.0    | 0.0    | 1.0   | 0.0  |
| 21UR-35530 | 4.0     | 10.0  | 12.5   | 0.0    | 6.0   | 0.0  |
| 21UR-35540 | 8.0     | 1.0   | 4.0    | 0.0    | 0.0   | 0.0  |
| 21UR-35550 | 47.0    | 94.0  | 42.0   | 34.0   | 47.0  | 8.0  |
| 21UR-35560 | 0.0     | 0.0   | 0.0    | 0.0    | 0.0   | 0.0  |
| 21UR-35570 | 9.0     | 1.0   | 7.0    | 12.0   | 3.5   | 0.0  |
| 21UR-35580 | 0.0     | 0.0   | 0.0    | 0.0    | 0.0   | 0.0  |
| 21UR-35590 | 6.0     | 0.0   | 7.0    | 4.0    | 1.0   | 1.0  |
| 21UR-3560  | 0.0     | 0.0   | 0.0    | 0.0    | 0.0   | 0.0  |
| 21UR-35600 | 17.0    | 3.0   | 20.0   | 13.0   | 10.0  | 1.0  |
| 21UR-35610 | 0.0     | 1.0   | 0.0    | 0.0    | 0.0   | 0.0  |
| 21UR-35620 | 1.0     | 1.0   | 1.0    | 1.0    | 1.0   | 0.0  |
| 21UR-35630 | 0.0     | 0.0   | 0.0    | 0.0    | 0.0   | 0.0  |
| 21UR-35640 | 3.0     | 4.0   | 0.0    | 0.0    | 6.0   | 0.0  |
| 21UR-35650 | 99.0    | 4.0   | 57.0   | 21.0   | 6.0   | 0.0  |
| 21UR-35660 | 0.0     | 0.0   | 0.0    | 0.0    | 0.0   | 0.0  |
| 21UR-35670 | 1.0     | 0.0   | 0.0    | 0.0    | 0.0   | 0.0  |
| 21UR-35680 | 0.0     | 0.0   | 0.0    | 0.0    | 0.0   | 0.0  |
| 21UR-35690 | 8.0     | 3.0   | 1.0    | 1.0    | 4.0   | 1.0  |
| 21UR-3570  | 0.0     | 0.0   | 0.0    | 0.0    | 0.0   | 0.0  |
| 21UR-35700 | 4.0     | 1.0   | 4.0    | 0.0    | 1.0   | 0.0  |
| 21UR-35710 | 7.0     | 6.0   | 1.0    | 1.0    | 14.0  | 0.0  |
| 21UR-35720 | 1.0     | 0.0   | 0.0    | 0.0    | 0.0   | 0.0  |
| 21UR-35730 | 12.0    | 15.0  | 18.0   | 6.0    | 8.0   | 0.0  |
| 21UR-35740 | 1.0     | 1.0   | 1.0    | 0.0    | 4.0   | 0.0  |
| 21UR-35750 | 0.0     | 0.0   | 0.0    | 0.0    | 0.0   | 0.0  |
| 21UR-35760 | 85.0    | 72.0  | 76.7   | 23.0   | 83.0  | 23.0 |
| 21UR-35770 | 0.0     | 0.0   | 0.0    | 0.0    | 0.0   | 0.0  |
| 21UR-35780 | 0.0     | 0.0   | 0.0    | 0.0    | 0.0   | 0.0  |
| 21UR-35790 | 0.0     | 1.0   | 0.0    | 0.0    | 0.0   | 0.0  |
| 21UR-3580  | 4.0     | 0.0   | 1.0    | 1.0    | 1.0   | 0.0  |
| 21UR-35800 | 0.0     | 0.0   | 0.0    | 0.0    | 0.0   | 0.0  |
| 21UR-35810 | 10.0    | 0.0   | 10.0   | 12.0   | 12.0  | 1.0  |
| 21UR-35820 | 29.0    | 4.0   | 22.0   | 10.0   | 3.0   | 4.0  |
| 21UR-35830 | 8.0     | 2.0   | 6.0    | 0.0    | 7.0   | 0.0  |
| 21UR-35840 | 0.0     | 7.5   | 0.0    | 0.0    | 9.0   | 4.0  |
| 21UR-35850 | 0.0     | 0.0   | 0.0    | 0.0    | 0.0   | 0.0  |
| 21UR-35860 | 0.0     | 0.5   | 0.0    | 0.0    | 0.0   | 0.0  |
| 21UR-35870 | 0.0     | 1.0   | 0.0    | 1.0    | 0.0   | 0.0  |
| 21UR-35880 | 14596.7 | 881.5 | 9903.8 | 3429.3 | 797.0 | 96.0 |
| 21UR-35890 | 52.0    | 8.0   | 31.0   | 23.0   | 20.0  | 1.0  |
| 21UR-3590  | 0.0     | 0.0   | 0.0    | 0.0    | 0.0   | 0.0  |
| 21UR-35900 | 32.0    | 2.0   | 41.0   | 25.0   | 22.0  | 4.0  |
| 21UR-35910 | 5.0     | 5.0   | 9.0    | 1.0    | 8.0   | 0.0  |
| 21UR-35920 | 1.0     | 1.0   | 2.0    | 0.0    | 3.0   | 0.0  |
| 21UR-35930 | 0.0     | 1.0   | 3.0    | 0.0    | 2.0   | 1.0  |
| 21UR-35940 | 0.0     | 0.0   | 6.0    | 0.0    | 6.0   | 0.0  |
| 21UR-35950 | 1.0     | 0.0   | 1.0    | 4.0    | 0.0   | 0.0  |
| 21UR-35960 | 0.0     | 0.0   | 0.0    | 0.0    | 0.0   | 0.0  |

|            |        |       |        |       |       |      |
|------------|--------|-------|--------|-------|-------|------|
| 21UR-35970 | 4.0    | 1.0   | 2.0    | 0.0   | 2.0   | 0.0  |
| 21UR-35980 | 0.0    | 1.0   | 0.0    | 0.0   | 0.0   | 0.0  |
| 21UR-35990 | 0.0    | 0.0   | 0.0    | 0.0   | 0.0   | 0.0  |
| 21UR-360   | 18.0   | 16.0  | 32.0   | 18.0  | 4.0   | 8.0  |
| 21UR-3600  | 0.0    | 0.0   | 0.0    | 0.0   | 0.0   | 0.0  |
| 21UR-36000 | 1.0    | 0.0   | 0.0    | 0.0   | 0.0   | 0.0  |
| 21UR-36010 | 167.0  | 16.0  | 170.5  | 92.0  | 27.0  | 0.0  |
| 21UR-36020 | 4.0    | 1.0   | 1.0    | 1.0   | 2.0   | 0.0  |
| 21UR-36030 | 0.0    | 0.0   | 0.0    | 0.0   | 0.0   | 0.0  |
| 21UR-36040 | 740.0  | 21.0  | 781.0  | 245.0 | 134.0 | 2.0  |
| 21UR-36050 | 0.0    | 0.0   | 0.0    | 0.0   | 0.0   | 0.0  |
| 21UR-36060 | 0.0    | 0.0   | 0.0    | 0.0   | 0.0   | 0.0  |
| 21UR-36070 | 0.0    | 0.0   | 0.0    | 0.0   | 4.0   | 0.0  |
| 21UR-36080 | 0.0    | 0.0   | 0.0    | 0.0   | 0.0   | 0.0  |
| 21UR-36090 | 11.0   | 1.0   | 16.0   | 4.0   | 16.0  | 0.0  |
| 21UR-3610  | 67.0   | 32.0  | 50.0   | 25.0  | 60.0  | 13.0 |
| 21UR-36100 | 1.0    | 0.0   | 0.0    | 0.0   | 0.0   | 1.0  |
| 21UR-36110 | 0.0    | 0.0   | 0.0    | 0.0   | 0.0   | 0.0  |
| 21UR-36120 | 1.0    | 0.0   | 1.0    | 0.0   | 0.0   | 0.0  |
| 21UR-36130 | 226.0  | 50.2  | 110.0  | 36.0  | 158.3 | 11.0 |
| 21UR-36140 | 38.0   | 1.0   | 24.0   | 10.0  | 0.0   | 0.0  |
| 21UR-36150 | 40.0   | 20.0  | 40.0   | 16.0  | 10.0  | 0.0  |
| 21UR-36160 | 0.0    | 0.0   | 0.0    | 0.0   | 0.0   | 0.0  |
| 21UR-36170 | 0.0    | 0.0   | 0.0    | 0.0   | 0.0   | 0.0  |
| 21UR-36180 | 0.0    | 0.0   | 0.0    | 0.0   | 1.0   | 0.0  |
| 21UR-36190 | 0.0    | 0.0   | 1.0    | 0.0   | 0.0   | 0.0  |
| 21UR-3620  | 10.0   | 4.0   | 6.0    | 0.0   | 6.0   | 1.0  |
| 21UR-36200 | 3.0    | 4.0   | 9.0    | 1.0   | 14.0  | 1.0  |
| 21UR-36210 | 4.0    | 1.0   | 1.0    | 0.0   | 0.0   | 0.0  |
| 21UR-36220 | 0.0    | 0.0   | 0.0    | 0.0   | 0.0   | 0.0  |
| 21UR-36230 | 1.0    | 0.0   | 0.0    | 1.0   | 0.0   | 0.0  |
| 21UR-36240 | 1.0    | 0.0   | 4.0    | 0.0   | 2.0   | 0.0  |
| 21UR-36250 | 13.0   | 59.0  | 16.0   | 4.0   | 24.0  | 11.0 |
| 21UR-36260 | 0.0    | 0.0   | 0.0    | 0.0   | 0.0   | 0.0  |
| 21UR-36280 | 0.0    | 3.3   | 0.0    | 0.0   | 0.0   | 0.0  |
| 21UR-36290 | 0.0    | 0.0   | 0.0    | 0.0   | 0.0   | 0.0  |
| 21UR-3630  | 0.0    | 2.0   | 0.0    | 0.0   | 3.0   | 0.0  |
| 21UR-36310 | 0.0    | 0.0   | 0.0    | 0.0   | 0.0   | 1.0  |
| 21UR-36320 | 0.0    | 2.0   | 6.0    | 0.0   | 2.0   | 0.0  |
| 21UR-36330 | 0.0    | 0.0   | 0.0    | 0.0   | 1.0   | 0.0  |
| 21UR-36340 | 1.0    | 0.0   | 0.5    | 1.0   | 1.0   | 0.0  |
| 21UR-36350 | 0.0    | 0.0   | 0.0    | 0.0   | 1.0   | 0.0  |
| 21UR-36360 | 65.0   | 10.0  | 68.0   | 9.0   | 9.0   | 4.0  |
| 21UR-36370 | 1.0    | 1.0   | 1.0    | 0.0   | 3.0   | 0.0  |
| 21UR-36380 | 0.0    | 0.0   | 0.0    | 0.0   | 0.0   | 0.0  |
| 21UR-36390 | 10.0   | 6.0   | 13.0   | 10.0  | 8.0   | 1.0  |
| 21UR-3640  | 0.0    | 0.0   | 0.0    | 0.0   | 0.0   | 0.0  |
| 21UR-36400 | 0.0    | 0.0   | 0.0    | 0.0   | 2.0   | 1.0  |
| 21UR-36410 | 0.0    | 0.0   | 0.0    | 0.0   | 0.0   | 0.0  |
| 21UR-36420 | 1485.9 | 200.8 | 1226.0 | 801.3 | 491.3 | 27.0 |
| 21UR-36430 | 0.0    | 8.0   | 0.0    | 0.0   | 13.0  | 0.0  |

|            |        |       |       |       |       |      |
|------------|--------|-------|-------|-------|-------|------|
| 21UR-36440 | 22.0   | 1.0   | 16.0  | 1.0   | 3.0   | 1.0  |
| 21UR-36450 | 2.0    | 0.5   | 1.0   | 0.0   | 1.0   | 0.0  |
| 21UR-36460 | 9.0    | 23.0  | 1.0   | 2.0   | 24.5  | 4.0  |
| 21UR-36470 | 0.0    | 1.0   | 1.0   | 0.0   | 0.0   | 0.0  |
| 21UR-36480 | 1.0    | 0.0   | 0.0   | 0.0   | 0.0   | 0.0  |
| 21UR-36490 | 1.0    | 7.0   | 0.0   | 0.0   | 7.0   | 2.0  |
| 21UR-3650  | 1.0    | 3.0   | 1.0   | 0.0   | 0.0   | 0.0  |
| 21UR-36500 | 77.0   | 17.0  | 70.0  | 29.0  | 34.0  | 6.0  |
| 21UR-36510 | 545.5  | 186.5 | 503.0 | 281.0 | 389.0 | 27.0 |
| 21UR-36520 | 1.0    | 1.0   | 0.0   | 0.0   | 0.0   | 0.0  |
| 21UR-36530 | 1.0    | 0.0   | 1.0   | 0.0   | 0.0   | 0.0  |
| 21UR-36540 | 0.0    | 0.0   | 0.0   | 0.0   | 1.0   | 0.0  |
| 21UR-36550 | 0.0    | 0.0   | 0.0   | 0.0   | 6.0   | 0.0  |
| 21UR-36560 | 0.0    | 0.0   | 0.0   | 0.0   | 0.0   | 0.0  |
| 21UR-36570 | 0.0    | 0.0   | 0.0   | 0.0   | 0.0   | 0.0  |
| 21UR-36580 | 12.0   | 8.0   | 6.0   | 5.0   | 15.5  | 0.0  |
| 21UR-36590 | 5.0    | 12.0  | 4.0   | 1.0   | 12.0  | 5.0  |
| 21UR-3660  | 0.0    | 1.0   | 4.0   | 0.0   | 2.0   | 0.0  |
| 21UR-36600 | 12.0   | 0.0   | 12.0  | 6.0   | 1.0   | 1.0  |
| 21UR-36610 | 0.0    | 0.0   | 0.0   | 1.0   | 2.0   | 1.0  |
| 21UR-36620 | 1.0    | 0.0   | 7.0   | 1.0   | 1.0   | 1.0  |
| 21UR-36630 | 0.0    | 0.0   | 0.0   | 0.0   | 0.0   | 0.0  |
| 21UR-36640 | 0.0    | 1.0   | 1.0   | 0.0   | 1.0   | 0.0  |
| 21UR-36650 | 26.0   | 0.0   | 30.0  | 8.0   | 7.0   | 0.0  |
| 21UR-36660 | 0.0    | 0.0   | 0.0   | 0.0   | 0.0   | 0.0  |
| 21UR-36670 | 6.0    | 0.0   | 12.0  | 0.0   | 0.0   | 1.0  |
| 21UR-36680 | 1.0    | 1.0   | 0.0   | 0.0   | 6.0   | 0.0  |
| 21UR-36690 | 14.0   | 14.0  | 21.0  | 7.0   | 14.0  | 2.0  |
| 21UR-3670  | 1.0    | 8.0   | 4.0   | 1.0   | 1.0   | 1.0  |
| 21UR-36700 | 57.0   | 3.0   | 20.0  | 10.0  | 26.0  | 6.0  |
| 21UR-36710 | 0.0    | 4.0   | 0.0   | 0.0   | 1.0   | 0.0  |
| 21UR-36720 | 17.0   | 8.3   | 19.0  | 2.0   | 11.0  | 1.0  |
| 21UR-36730 | 12.0   | 0.0   | 1.0   | 4.0   | 0.0   | 0.0  |
| 21UR-36740 | 1.0    | 0.0   | 0.0   | 0.0   | 0.0   | 0.0  |
| 21UR-36750 | 8.0    | 33.0  | 12.0  | 1.0   | 55.0  | 1.0  |
| 21UR-36760 | 10.0   | 1.0   | 13.0  | 12.0  | 2.0   | 0.0  |
| 21UR-36770 | 0.0    | 0.0   | 0.0   | 0.0   | 0.0   | 0.0  |
| 21UR-36780 | 0.0    | 0.0   | 0.0   | 0.0   | 4.0   | 0.0  |
| 21UR-36790 | 6.0    | 14.0  | 6.0   | 1.0   | 14.0  | 0.0  |
| 21UR-3680  | 0.0    | 2.0   | 0.0   | 0.0   | 1.0   | 1.0  |
| 21UR-36800 | 1.0    | 0.0   | 1.0   | 0.0   | 1.0   | 0.0  |
| 21UR-36810 | 151.0  | 7.0   | 128.0 | 16.0  | 36.0  | 0.0  |
| 21UR-36820 | 0.0    | 0.0   | 0.0   | 0.0   | 0.0   | 0.0  |
| 21UR-36830 | 1.0    | 1.0   | 0.0   | 0.0   | 1.0   | 0.0  |
| 21UR-36840 | 1040.3 | 77.0  | 762.0 | 293.0 | 87.0  | 7.0  |
| 21UR-36850 | 0.0    | 0.0   | 1.0   | 0.0   | 0.0   | 0.0  |
| 21UR-36860 | 0.0    | 2.0   | 0.0   | 0.0   | 0.0   | 0.0  |
| 21UR-36870 | 0.0    | 1.0   | 0.0   | 1.0   | 1.0   | 0.0  |
| 21UR-36880 | 20.0   | 1.0   | 13.0  | 14.0  | 0.0   | 0.0  |
| 21UR-36890 | 0.0    | 0.0   | 0.0   | 0.0   | 0.0   | 0.0  |
| 21UR-36900 | 14.0   | 3.0   | 20.0  | 3.0   | 9.0   | 0.0  |

|            |        |       |        |        |       |      |
|------------|--------|-------|--------|--------|-------|------|
| 21UR-36910 | 0.0    | 0.0   | 0.0    | 0.0    | 0.0   | 0.0  |
| 21UR-36920 | 146.0  | 24.0  | 76.0   | 46.0   | 42.0  | 4.0  |
| 21UR-36930 | 5.0    | 3.0   | 7.0    | 3.0    | 3.0   | 0.0  |
| 21UR-36940 | 0.0    | 0.0   | 0.0    | 0.0    | 0.0   | 0.0  |
| 21UR-36950 | 22.8   | 21.3  | 24.0   | 3.0    | 51.0  | 1.0  |
| 21UR-36960 | 0.0    | 0.0   | 0.0    | 0.0    | 0.0   | 0.0  |
| 21UR-36970 | 0.0    | 0.0   | 0.0    | 0.0    | 0.0   | 0.0  |
| 21UR-36980 | 2.0    | 0.0   | 1.0    | 0.0    | 0.0   | 1.0  |
| 21UR-36990 | 0.0    | 0.0   | 1.0    | 0.0    | 6.0   | 0.0  |
| 21UR-370   | 0.0    | 0.0   | 0.0    | 0.0    | 0.0   | 0.0  |
| 21UR-3700  | 0.0    | 0.0   | 0.0    | 0.0    | 0.0   | 0.0  |
| 21UR-37010 | 1.0    | 2.0   | 0.0    | 0.0    | 0.0   | 1.0  |
| 21UR-37020 | 0.0    | 0.0   | 0.0    | 0.0    | 0.0   | 0.0  |
| 21UR-37030 | 3.0    | 0.0   | 0.0    | 0.0    | 0.0   | 0.0  |
| 21UR-37040 | 9.0    | 0.0   | 6.0    | 5.0    | 0.0   | 0.0  |
| 21UR-37050 | 0.0    | 0.0   | 1.0    | 0.0    | 0.0   | 0.0  |
| 21UR-37060 | 1.0    | 0.5   | 0.0    | 0.0    | 0.0   | 0.0  |
| 21UR-37070 | 0.0    | 0.0   | 0.0    | 0.0    | 0.0   | 0.0  |
| 21UR-37080 | 12.0   | 18.2  | 10.0   | 5.0    | 61.0  | 4.0  |
| 21UR-37090 | 0.0    | 1.0   | 1.0    | 0.0    | 1.0   | 1.0  |
| 21UR-37100 | 1.0    | 0.0   | 0.0    | 0.0    | 0.0   | 0.0  |
| 21UR-37110 | 0.0    | 0.0   | 0.0    | 0.0    | 0.0   | 0.0  |
| 21UR-37120 | 0.0    | 0.0   | 1.0    | 0.0    | 1.0   | 0.0  |
| 21UR-37130 | 2.0    | 0.0   | 3.0    | 0.0    | 0.0   | 0.0  |
| 21UR-37140 | 0.0    | 0.0   | 0.0    | 0.0    | 0.0   | 0.0  |
| 21UR-37150 | 3.0    | 0.0   | 0.0    | 0.0    | 4.0   | 0.0  |
| 21UR-37160 | 10.0   | 0.3   | 10.0   | 4.0    | 1.0   | 0.0  |
| 21UR-37170 | 2.0    | 0.0   | 0.0    | 0.0    | 2.0   | 0.0  |
| 21UR-37180 | 1.0    | 0.0   | 3.0    | 0.0    | 1.0   | 1.0  |
| 21UR-37190 | 0.0    | 0.0   | 0.0    | 0.0    | 4.0   | 0.0  |
| 21UR-3720  | 4.0    | 9.0   | 8.0    | 2.0    | 14.0  | 1.0  |
| 21UR-37200 | 267.0  | 125.0 | 138.0  | 66.0   | 51.3  | 13.0 |
| 21UR-37210 | 24.0   | 27.0  | 27.7   | 11.0   | 81.0  | 1.0  |
| 21UR-37220 | 0.0    | 0.0   | 0.0    | 0.0    | 0.0   | 0.0  |
| 21UR-37230 | 0.0    | 0.0   | 0.0    | 0.0    | 0.0   | 0.0  |
| 21UR-37240 | 0.0    | 0.0   | 0.0    | 0.0    | 0.0   | 0.0  |
| 21UR-37250 | 1.0    | 0.0   | 6.0    | 1.0    | 3.0   | 0.0  |
| 21UR-37260 | 8.0    | 6.0   | 4.0    | 0.0    | 8.0   | 1.1  |
| 21UR-37270 | 0.0    | 0.0   | 1.0    | 0.0    | 0.0   | 0.0  |
| 21UR-37280 | 0.0    | 1.0   | 1.0    | 0.0    | 0.0   | 0.0  |
| 21UR-37290 | 0.0    | 0.0   | 0.0    | 0.0    | 1.0   | 0.0  |
| 21UR-3730  | 0.0    | 0.0   | 0.0    | 0.0    | 1.0   | 1.0  |
| 21UR-37300 | 308.5  | 279.0 | 293.5  | 117.0  | 178.0 | 39.0 |
| 21UR-37310 | 4.0    | 0.3   | 1.0    | 0.0    | 1.0   | 1.0  |
| 21UR-37320 | 1.0    | 2.0   | 0.0    | 0.0    | 1.0   | 2.0  |
| 21UR-37330 | 9.0    | 6.0   | 11.0   | 1.0    | 9.0   | 0.0  |
| 21UR-37340 | 1.0    | 0.0   | 1.0    | 1.0    | 0.0   | 0.0  |
| 21UR-37350 | 0.0    | 0.0   | 0.0    | 0.0    | 0.0   | 0.0  |
| 21UR-37360 | 2392.0 | 128.0 | 1883.0 | 1004.0 | 200.0 | 24.1 |
| 21UR-37370 | 8.0    | 0.0   | 8.0    | 0.0    | 7.0   | 0.0  |
| 21UR-37380 | 0.0    | 0.0   | 0.0    | 0.0    | 0.0   | 0.0  |

|            |        |       |       |       |       |      |
|------------|--------|-------|-------|-------|-------|------|
| 21UR-37390 | 0.0    | 4.0   | 0.0   | 0.0   | 2.0   | 0.0  |
| 21UR-3740  | 0.0    | 0.0   | 0.0   | 0.0   | 1.0   | 0.0  |
| 21UR-37400 | 23.0   | 11.0  | 20.0  | 15.0  | 8.0   | 0.0  |
| 21UR-37410 | 0.0    | 0.0   | 0.0   | 0.0   | 0.0   | 0.0  |
| 21UR-37420 | 77.0   | 1.0   | 46.0  | 13.0  | 4.0   | 0.0  |
| 21UR-37430 | 18.0   | 3.2   | 4.0   | 1.0   | 0.0   | 0.1  |
| 21UR-37440 | 0.0    | 0.0   | 0.0   | 0.0   | 0.0   | 0.0  |
| 21UR-37450 | 0.0    | 0.0   | 0.0   | 0.0   | 0.0   | 0.0  |
| 21UR-37460 | 2.0    | 0.0   | 0.0   | 0.0   | 8.0   | 0.0  |
| 21UR-37470 | 0.0    | 0.0   | 0.0   | 0.0   | 0.0   | 0.0  |
| 21UR-37480 | 6.0    | 1.0   | 1.0   | 0.0   | 11.0  | 0.0  |
| 21UR-37490 | 0.0    | 6.1   | 0.0   | 1.0   | 7.0   | 2.0  |
| 21UR-3750  | 0.0    | 0.0   | 0.0   | 0.0   | 0.0   | 0.0  |
| 21UR-37500 | 8.0    | 9.0   | 1.0   | 1.0   | 0.0   | 0.0  |
| 21UR-37510 | 0.0    | 0.0   | 4.0   | 0.0   | 0.0   | 0.0  |
| 21UR-37520 | 1.0    | 1.0   | 0.0   | 0.0   | 0.0   | 0.0  |
| 21UR-37530 | 24.0   | 4.0   | 16.0  | 0.0   | 4.0   | 0.0  |
| 21UR-37540 | 0.0    | 0.0   | 0.0   | 0.0   | 0.0   | 0.0  |
| 21UR-37550 | 9.1    | 5.0   | 11.0  | 0.0   | 9.0   | 3.0  |
| 21UR-37560 | 0.0    | 0.0   | 0.0   | 0.0   | 6.0   | 0.0  |
| 21UR-37570 | 0.0    | 0.0   | 0.0   | 0.0   | 0.0   | 0.0  |
| 21UR-37580 | 0.0    | 0.0   | 0.0   | 4.0   | 0.0   | 0.0  |
| 21UR-37590 | 1.0    | 1.0   | 0.0   | 0.0   | 2.0   | 2.0  |
| 21UR-3760  | 0.0    | 0.0   | 0.0   | 0.0   | 0.0   | 0.0  |
| 21UR-37600 | 1.0    | 1.0   | 1.0   | 0.0   | 10.0  | 1.0  |
| 21UR-37610 | 81.5   | 4.0   | 70.0  | 20.0  | 4.1   | 0.0  |
| 21UR-37620 | 0.0    | 0.0   | 0.0   | 1.0   | 7.0   | 0.0  |
| 21UR-37630 | 1.0    | 1.0   | 0.0   | 0.0   | 0.0   | 0.0  |
| 21UR-37650 | 0.0    | 0.0   | 0.0   | 0.0   | 0.0   | 0.0  |
| 21UR-37660 | 151.0  | 2.0   | 113.0 | 53.0  | 19.0  | 1.0  |
| 21UR-37670 | 0.0    | 0.0   | 0.0   | 0.0   | 0.0   | 0.0  |
| 21UR-37680 | 9.0    | 12.0  | 14.0  | 8.0   | 21.4  | 6.0  |
| 21UR-37690 | 0.0    | 2.0   | 0.0   | 0.0   | 1.0   | 0.0  |
| 21UR-3770  | 0.0    | 0.0   | 0.0   | 0.0   | 1.0   | 0.0  |
| 21UR-37700 | 1.0    | 1.0   | 0.0   | 0.0   | 0.0   | 0.0  |
| 21UR-37710 | 4.0    | 0.0   | 4.0   | 0.0   | 1.0   | 0.0  |
| 21UR-37720 | 0.0    | 0.0   | 0.0   | 0.0   | 1.0   | 0.0  |
| 21UR-37730 | 0.0    | 3.0   | 1.0   | 0.0   | 1.0   | 0.0  |
| 21UR-37740 | 0.0    | 0.0   | 0.0   | 0.0   | 0.0   | 0.0  |
| 21UR-37750 | 682.5  | 77.0  | 725.0 | 436.0 | 194.0 | 13.0 |
| 21UR-37760 | 0.0    | 0.0   | 0.0   | 0.0   | 0.0   | 0.0  |
| 21UR-37770 | 0.0    | 0.0   | 1.0   | 0.0   | 0.0   | 0.0  |
| 21UR-37780 | 0.0    | 0.0   | 0.0   | 0.0   | 0.0   | 0.0  |
| 21UR-37790 | 1170.0 | 292.5 | 925.9 | 298.0 | 331.0 | 16.0 |
| 21UR-3780  | 1.0    | 0.0   | 3.0   | 1.0   | 0.0   | 0.0  |
| 21UR-37800 | 0.0    | 0.0   | 4.0   | 0.0   | 3.0   | 1.0  |
| 21UR-37810 | 6.0    | 0.0   | 6.0   | 0.0   | 0.0   | 0.0  |
| 21UR-37820 | 0.0    | 15.0  | 1.0   | 0.0   | 1.0   | 0.0  |
| 21UR-37830 | 0.0    | 0.0   | 0.0   | 0.0   | 0.0   | 0.0  |
| 21UR-37840 | 79.4   | 123.3 | 129.0 | 20.0  | 168.5 | 14.0 |
| 21UR-37850 | 1.0    | 0.0   | 0.0   | 1.0   | 0.0   | 0.0  |

|            |        |       |        |        |       |      |
|------------|--------|-------|--------|--------|-------|------|
| 21UR-37870 | 3.0    | 8.0   | 5.0    | 1.0    | 20.0  | 0.0  |
| 21UR-37880 | 15.0   | 53.5  | 14.0   | 4.0    | 40.0  | 2.0  |
| 21UR-37890 | 0.0    | 0.0   | 0.0    | 0.0    | 0.0   | 1.0  |
| 21UR-3790  | 299.5  | 36.0  | 198.0  | 130.5  | 82.0  | 7.0  |
| 21UR-37900 | 4.0    | 0.0   | 0.0    | 0.0    | 0.0   | 0.0  |
| 21UR-37910 | 7.0    | 3.0   | 10.0   | 0.0    | 0.0   | 2.0  |
| 21UR-37920 | 1.0    | 1.0   | 4.0    | 1.0    | 0.0   | 0.0  |
| 21UR-37940 | 0.0    | 0.0   | 1.0    | 0.0    | 0.0   | 0.0  |
| 21UR-37960 | 0.0    | 0.0   | 0.0    | 0.0    | 0.0   | 0.0  |
| 21UR-37970 | 0.0    | 0.0   | 0.0    | 0.0    | 0.0   | 0.0  |
| 21UR-37980 | 2.0    | 2.1   | 0.0    | 0.0    | 6.0   | 0.0  |
| 21UR-37990 | 0.0    | 0.0   | 0.0    | 0.0    | 0.0   | 0.0  |
| 21UR-380   | 28.0   | 29.5  | 30.0   | 4.0    | 80.0  | 2.0  |
| 21UR-3800  | 0.0    | 0.0   | 0.0    | 0.0    | 1.0   | 0.0  |
| 21UR-38010 | 19.0   | 35.0  | 15.0   | 6.0    | 4.0   | 3.0  |
| 21UR-38020 | 2525.2 | 170.0 | 1949.0 | 1098.0 | 107.0 | 7.0  |
| 21UR-38030 | 1.0    | 1.0   | 0.0    | 0.0    | 0.0   | 1.0  |
| 21UR-38050 | 148.0  | 77.3  | 134.0  | 37.0   | 232.0 | 12.0 |
| 21UR-38060 | 1.0    | 1.0   | 0.0    | 0.0    | 1.0   | 0.0  |
| 21UR-38070 | 0.0    | 0.0   | 0.0    | 0.0    | 0.0   | 0.0  |
| 21UR-38080 | 5.0    | 0.0   | 13.0   | 0.0    | 1.1   | 1.0  |
| 21UR-38090 | 19.0   | 10.0  | 19.0   | 11.0   | 7.0   | 1.0  |
| 21UR-3810  | 0.0    | 0.0   | 4.0    | 0.0    | 0.0   | 0.0  |
| 21UR-38100 | 0.0    | 2.0   | 0.0    | 0.0    | 2.0   | 0.0  |
| 21UR-38110 | 3.0    | 4.0   | 6.0    | 0.0    | 0.0   | 1.0  |
| 21UR-38120 | 1.0    | 0.0   | 0.0    | 0.0    | 0.0   | 0.0  |
| 21UR-38130 | 0.0    | 0.0   | 0.0    | 0.0    | 0.0   | 0.0  |
| 21UR-38140 | 0.0    | 1.0   | 0.0    | 0.0    | 0.0   | 0.0  |
| 21UR-38150 | 0.0    | 0.0   | 0.0    | 0.0    | 0.0   | 0.0  |
| 21UR-38160 | 0.0    | 2.0   | 1.0    | 0.0    | 4.0   | 1.0  |
| 21UR-38170 | 0.0    | 0.0   | 0.0    | 0.0    | 0.0   | 0.0  |
| 21UR-38180 | 1.0    | 1.0   | 0.0    | 0.0    | 3.0   | 0.0  |
| 21UR-38190 | 167.0  | 19.2  | 115.0  | 47.0   | 6.0   | 2.0  |
| 21UR-3820  | 1.0    | 0.0   | 0.0    | 0.0    | 2.0   | 0.0  |
| 21UR-38200 | 0.0    | 0.0   | 0.0    | 0.0    | 2.0   | 0.0  |
| 21UR-38210 | 74.0   | 1.0   | 35.0   | 25.0   | 14.0  | 0.0  |
| 21UR-38220 | 15.0   | 4.0   | 12.0   | 4.0    | 13.0  | 1.0  |
| 21UR-38230 | 1.0    | 4.0   | 2.0    | 0.0    | 1.5   | 0.0  |
| 21UR-38240 | 0.0    | 1.0   | 0.0    | 0.0    | 2.0   | 1.0  |
| 21UR-38250 | 1.0    | 0.0   | 0.0    | 0.0    | 0.0   | 1.0  |
| 21UR-38260 | 8.0    | 1.0   | 14.0   | 8.0    | 0.0   | 0.0  |
| 21UR-38270 | 8.0    | 1.0   | 11.0   | 2.0    | 3.0   | 0.0  |
| 21UR-38280 | 0.0    | 0.0   | 0.0    | 0.0    | 0.0   | 0.0  |
| 21UR-38290 | 0.0    | 0.0   | 0.0    | 0.0    | 0.0   | 0.0  |
| 21UR-3830  | 1.0    | 1.0   | 0.0    | 1.0    | 0.0   | 0.0  |
| 21UR-38300 | 0.0    | 0.0   | 0.0    | 0.0    | 0.0   | 0.0  |
| 21UR-38310 | 0.0    | 0.0   | 0.0    | 0.0    | 0.0   | 0.0  |
| 21UR-38330 | 0.0    | 0.0   | 0.0    | 0.0    | 0.0   | 0.0  |
| 21UR-38340 | 0.0    | 0.0   | 0.0    | 0.0    | 1.0   | 0.0  |
| 21UR-38350 | 0.0    | 1.0   | 0.0    | 1.0    | 0.0   | 0.0  |
| 21UR-38360 | 0.0    | 0.0   | 0.0    | 0.0    | 1.0   | 0.0  |

|            |       |       |       |       |       |      |
|------------|-------|-------|-------|-------|-------|------|
| 21UR-38370 | 13.0  | 1.0   | 10.0  | 1.0   | 4.0   | 1.0  |
| 21UR-38380 | 0.0   | 1.0   | 0.0   | 0.0   | 0.0   | 0.0  |
| 21UR-38390 | 6.0   | 4.0   | 8.0   | 6.0   | 1.0   | 0.0  |
| 21UR-3840  | 348.0 | 21.0  | 271.0 | 82.0  | 50.0  | 0.0  |
| 21UR-38400 | 1.0   | 4.0   | 6.0   | 0.0   | 4.0   | 1.0  |
| 21UR-38410 | 1.0   | 1.0   | 0.0   | 0.0   | 0.0   | 0.0  |
| 21UR-38420 | 95.0  | 8.2   | 43.0  | 24.7  | 4.0   | 0.0  |
| 21UR-38430 | 25.0  | 5.0   | 21.0  | 9.0   | 3.0   | 1.0  |
| 21UR-38440 | 0.0   | 0.0   | 0.0   | 0.0   | 4.0   | 1.0  |
| 21UR-38450 | 0.0   | 0.0   | 0.0   | 0.0   | 2.0   | 0.0  |
| 21UR-38460 | 30.0  | 9.0   | 32.0  | 10.0  | 22.0  | 1.0  |
| 21UR-38470 | 0.0   | 0.0   | 4.0   | 0.0   | 0.0   | 0.0  |
| 21UR-38480 | 1.0   | 0.0   | 0.0   | 0.0   | 12.0  | 1.0  |
| 21UR-38490 | 0.0   | 8.0   | 1.0   | 1.0   | 4.0   | 1.0  |
| 21UR-3850  | 1.0   | 3.0   | 1.0   | 0.0   | 0.0   | 0.0  |
| 21UR-38500 | 4.0   | 24.0  | 6.0   | 1.0   | 0.0   | 0.0  |
| 21UR-38510 | 0.0   | 0.0   | 0.0   | 0.0   | 0.0   | 0.0  |
| 21UR-38520 | 104.0 | 69.0  | 81.0  | 21.0  | 102.0 | 18.0 |
| 21UR-38530 | 0.0   | 0.0   | 0.0   | 0.0   | 0.0   | 0.0  |
| 21UR-38540 | 0.0   | 4.0   | 0.0   | 0.0   | 6.0   | 0.0  |
| 21UR-38550 | 1.0   | 0.0   | 1.0   | 0.0   | 0.0   | 0.0  |
| 21UR-38560 | 10.0  | 0.0   | 6.0   | 0.0   | 1.0   | 0.0  |
| 21UR-38570 | 0.0   | 0.0   | 0.0   | 1.0   | 0.0   | 0.0  |
| 21UR-38580 | 0.0   | 0.0   | 0.0   | 0.0   | 0.0   | 0.0  |
| 21UR-38590 | 0.0   | 0.0   | 0.0   | 0.0   | 1.0   | 1.0  |
| 21UR-3860  | 0.0   | 0.0   | 0.0   | 0.0   | 0.0   | 0.0  |
| 21UR-38600 | 0.0   | 1.0   | 0.0   | 0.0   | 0.0   | 0.0  |
| 21UR-38610 | 0.0   | 0.0   | 6.0   | 0.0   | 0.0   | 0.0  |
| 21UR-38620 | 4.0   | 0.0   | 0.0   | 0.0   | 1.0   | 0.0  |
| 21UR-38630 | 363.0 | 185.0 | 285.0 | 153.0 | 60.0  | 22.0 |
| 21UR-38640 | 1.0   | 0.0   | 0.0   | 0.0   | 4.0   | 0.0  |
| 21UR-38650 | 27.0  | 3.0   | 26.0  | 8.0   | 8.0   | 0.0  |
| 21UR-38660 | 4.0   | 4.0   | 0.0   | 1.0   | 3.0   | 0.0  |
| 21UR-38670 | 0.0   | 1.0   | 0.0   | 0.0   | 0.0   | 0.0  |
| 21UR-38680 | 0.0   | 0.0   | 0.0   | 0.0   | 0.0   | 0.0  |
| 21UR-38690 | 4.0   | 1.0   | 6.0   | 0.0   | 8.0   | 0.0  |
| 21UR-3870  | 14.0  | 4.0   | 24.0  | 8.0   | 15.0  | 0.0  |
| 21UR-38700 | 0.0   | 0.0   | 0.0   | 0.0   | 0.0   | 0.0  |
| 21UR-38710 | 15.0  | 17.0  | 7.0   | 5.0   | 12.0  | 3.0  |
| 21UR-38720 | 3.0   | 0.0   | 1.0   | 0.0   | 6.0   | 1.0  |
| 21UR-38730 | 0.0   | 1.0   | 0.0   | 0.0   | 4.0   | 0.0  |
| 21UR-38740 | 0.0   | 0.0   | 0.0   | 0.0   | 0.0   | 0.0  |
| 21UR-38750 | 17.0  | 5.0   | 15.0  | 12.0  | 15.0  | 1.0  |
| 21UR-38760 | 3.0   | 11.0  | 13.0  | 1.0   | 21.0  | 2.0  |
| 21UR-38770 | 6.0   | 6.0   | 4.0   | 2.0   | 22.0  | 0.0  |
| 21UR-38780 | 0.0   | 0.2   | 1.0   | 0.0   | 0.0   | 1.0  |
| 21UR-38790 | 0.0   | 1.0   | 0.0   | 0.0   | 0.0   | 0.0  |
| 21UR-3880  | 49.0  | 23.0  | 32.0  | 27.0  | 37.0  | 0.0  |
| 21UR-38800 | 0.0   | 0.0   | 0.0   | 0.0   | 0.0   | 0.0  |
| 21UR-38810 | 4.0   | 0.0   | 0.0   | 0.0   | 0.0   | 0.0  |
| 21UR-38820 | 0.0   | 0.0   | 0.0   | 0.0   | 0.0   | 0.0  |

|            |       |      |       |       |       |     |
|------------|-------|------|-------|-------|-------|-----|
| 21UR-38830 | 4.0   | 4.0  | 10.0  | 0.0   | 8.0   | 1.0 |
| 21UR-38840 | 1.0   | 0.0  | 0.0   | 1.0   | 0.0   | 0.0 |
| 21UR-38850 | 4.0   | 4.0  | 1.0   | 1.0   | 1.0   | 0.0 |
| 21UR-38860 | 56.0  | 3.0  | 38.0  | 18.0  | 31.0  | 0.0 |
| 21UR-38870 | 0.0   | 1.0  | 0.0   | 0.0   | 5.0   | 0.0 |
| 21UR-38880 | 0.0   | 0.0  | 0.0   | 0.0   | 0.0   | 0.0 |
| 21UR-38890 | 0.0   | 0.0  | 0.0   | 0.0   | 0.0   | 0.0 |
| 21UR-3890  | 0.0   | 0.0  | 0.0   | 0.0   | 0.0   | 0.0 |
| 21UR-38900 | 0.0   | 0.0  | 0.0   | 0.0   | 0.0   | 0.0 |
| 21UR-38910 | 0.0   | 0.0  | 0.0   | 0.0   | 0.0   | 0.0 |
| 21UR-38920 | 1.0   | 0.0  | 1.0   | 0.0   | 1.0   | 0.0 |
| 21UR-38930 | 1.0   | 0.0  | 1.0   | 0.0   | 0.0   | 0.0 |
| 21UR-38940 | 18.0  | 0.0  | 20.0  | 2.0   | 0.0   | 0.0 |
| 21UR-38950 | 0.0   | 0.0  | 0.0   | 0.0   | 1.0   | 0.0 |
| 21UR-38960 | 4.0   | 0.0  | 0.0   | 0.0   | 1.0   | 1.0 |
| 21UR-38970 | 29.0  | 33.0 | 32.0  | 8.0   | 38.7  | 4.0 |
| 21UR-38980 | 105.0 | 1.0  | 68.0  | 18.0  | 7.3   | 4.0 |
| 21UR-38990 | 0.0   | 0.0  | 0.0   | 0.0   | 0.0   | 0.0 |
| 21UR-390   | 0.0   | 0.0  | 0.0   | 0.0   | 0.0   | 0.0 |
| 21UR-3900  | 0.0   | 0.0  | 0.0   | 0.0   | 0.0   | 0.0 |
| 21UR-39000 | 2.8   | 0.0  | 2.0   | 0.0   | 1.0   | 0.0 |
| 21UR-39010 | 328.3 | 41.0 | 300.0 | 140.3 | 128.0 | 1.0 |
| 21UR-39020 | 8.0   | 10.0 | 14.0  | 7.0   | 4.0   | 1.0 |
| 21UR-39030 | 1.0   | 1.0  | 1.0   | 0.0   | 0.0   | 0.0 |
| 21UR-39040 | 34.0  | 32.0 | 35.0  | 4.0   | 63.3  | 4.0 |
| 21UR-39050 | 1.0   | 2.0  | 0.0   | 0.0   | 4.0   | 0.0 |
| 21UR-39060 | 1.0   | 0.0  | 1.0   | 4.0   | 1.0   | 0.0 |
| 21UR-39070 | 0.0   | 0.0  | 0.0   | 0.0   | 0.0   | 0.0 |
| 21UR-39080 | 0.0   | 1.0  | 1.0   | 0.0   | 0.0   | 0.0 |
| 21UR-39090 | 4.0   | 0.0  | 6.0   | 0.0   | 1.0   | 0.0 |
| 21UR-3910  | 8.0   | 4.0  | 8.0   | 4.0   | 6.0   | 0.0 |
| 21UR-39100 | 9.0   | 1.0  | 1.0   | 0.0   | 4.0   | 0.0 |
| 21UR-39110 | 0.0   | 0.3  | 1.0   | 0.0   | 0.0   | 0.0 |
| 21UR-39120 | 0.0   | 0.0  | 0.0   | 0.0   | 0.0   | 0.0 |
| 21UR-39130 | 0.0   | 0.0  | 0.0   | 0.0   | 0.0   | 0.0 |
| 21UR-39140 | 0.0   | 0.0  | 0.0   | 0.0   | 0.0   | 0.0 |
| 21UR-39150 | 0.0   | 2.0  | 1.0   | 0.0   | 1.0   | 0.0 |
| 21UR-39160 | 0.0   | 3.0  | 0.0   | 0.0   | 1.0   | 0.0 |
| 21UR-39170 | 0.0   | 0.0  | 0.0   | 0.0   | 0.0   | 0.0 |
| 21UR-39180 | 0.0   | 0.0  | 0.0   | 0.0   | 0.0   | 0.0 |
| 21UR-39190 | 8.0   | 2.5  | 3.5   | 1.0   | 0.0   | 1.0 |
| 21UR-3920  | 4.0   | 0.0  | 4.0   | 1.0   | 2.0   | 0.0 |
| 21UR-39200 | 1.0   | 19.0 | 8.0   | 6.0   | 9.0   | 4.0 |
| 21UR-39210 | 0.0   | 0.0  | 0.0   | 0.0   | 0.0   | 0.0 |
| 21UR-39220 | 17.0  | 6.0  | 14.0  | 8.0   | 20.0  | 3.0 |
| 21UR-39230 | 0.0   | 0.0  | 0.0   | 0.0   | 0.5   | 0.0 |
| 21UR-39240 | 0.0   | 0.0  | 0.0   | 0.0   | 0.0   | 0.0 |
| 21UR-39250 | 15.0  | 7.0  | 20.0  | 6.0   | 29.0  | 1.0 |
| 21UR-39260 | 89.0  | 38.0 | 79.0  | 34.0  | 116.5 | 4.0 |
| 21UR-39270 | 0.0   | 0.0  | 0.0   | 0.0   | 4.0   | 0.0 |
| 21UR-39290 | 593.0 | 29.1 | 452.0 | 305.2 | 67.5  | 0.0 |



|            |        |      |       |       |       |      |
|------------|--------|------|-------|-------|-------|------|
| 21UR-39300 | 0.0    | 0.0  | 0.0   | 0.0   | 0.0   | 0.0  |
| 21UR-39310 | 0.0    | 0.0  | 0.0   | 0.0   | 0.0   | 0.0  |
| 21UR-39320 | 0.0    | 0.0  | 0.0   | 0.0   | 0.0   | 0.0  |
| 21UR-39330 | 0.0    | 0.0  | 0.0   | 0.0   | 0.0   | 0.0  |
| 21UR-39340 | 4.0    | 5.0  | 6.0   | 0.0   | 6.0   | 0.0  |
| 21UR-39350 | 260.5  | 47.5 | 197.0 | 62.0  | 44.0  | 5.0  |
| 21UR-39360 | 65.0   | 12.0 | 59.0  | 14.0  | 7.0   | 1.0  |
| 21UR-39370 | 28.0   | 1.0  | 14.0  | 8.0   | 1.0   | 1.0  |
| 21UR-39380 | 0.0    | 2.0  | 0.0   | 0.0   | 0.0   | 0.0  |
| 21UR-39390 | 1.0    | 5.0  | 1.0   | 0.0   | 9.0   | 2.0  |
| 21UR-3940  | 0.0    | 0.0  | 0.0   | 0.0   | 0.0   | 0.0  |
| 21UR-39400 | 65.0   | 18.0 | 77.0  | 29.0  | 33.0  | 4.0  |
| 21UR-39410 | 0.0    | 0.0  | 0.0   | 0.0   | 0.0   | 0.0  |
| 21UR-39420 | 25.0   | 7.0  | 15.0  | 4.0   | 1.0   | 1.0  |
| 21UR-39430 | 1.0    | 0.0  | 0.0   | 0.0   | 0.0   | 0.0  |
| 21UR-39440 | 0.0    | 0.0  | 0.0   | 0.0   | 0.0   | 0.0  |
| 21UR-39450 | 1.0    | 0.0  | 4.0   | 1.0   | 0.0   | 0.0  |
| 21UR-39460 | 0.0    | 0.0  | 4.0   | 0.0   | 0.0   | 0.0  |
| 21UR-39470 | 1.0    | 6.0  | 4.0   | 0.0   | 14.0  | 0.0  |
| 21UR-39480 | 0.0    | 0.0  | 0.0   | 0.0   | 0.0   | 0.0  |
| 21UR-39490 | 4.0    | 4.0  | 4.0   | 0.0   | 4.0   | 0.0  |
| 21UR-3950  | 0.0    | 6.0  | 0.0   | 0.0   | 0.0   | 0.0  |
| 21UR-39500 | 0.0    | 0.0  | 1.0   | 0.0   | 0.0   | 0.0  |
| 21UR-39510 | 0.0    | 0.0  | 0.0   | 0.0   | 0.0   | 1.0  |
| 21UR-39520 | 1.0    | 0.0  | 0.0   | 0.0   | 6.0   | 0.0  |
| 21UR-39530 | 0.0    | 0.0  | 0.0   | 0.0   | 0.0   | 0.0  |
| 21UR-39540 | 1.0    | 0.0  | 1.0   | 1.0   | 0.0   | 0.0  |
| 21UR-39550 | 4.0    | 5.0  | 1.0   | 1.0   | 0.0   | 0.0  |
| 21UR-39560 | 0.0    | 13.0 | 1.0   | 0.0   | 4.0   | 0.0  |
| 21UR-39570 | 277.5  | 60.0 | 287.7 | 137.0 | 106.0 | 6.0  |
| 21UR-39580 | 0.0    | 0.0  | 0.0   | 0.0   | 0.0   | 0.0  |
| 21UR-39590 | 0.0    | 1.1  | 1.0   | 0.0   | 0.0   | 0.0  |
| 21UR-3960  | 0.0    | 0.0  | 0.0   | 0.0   | 0.0   | 0.0  |
| 21UR-39600 | 8.0    | 4.0  | 1.0   | 0.0   | 19.0  | 1.0  |
| 21UR-39610 | 3.0    | 12.0 | 0.0   | 0.0   | 9.0   | 0.0  |
| 21UR-39620 | 0.0    | 0.0  | 0.0   | 0.0   | 0.0   | 1.0  |
| 21UR-39630 | 14.0   | 1.0  | 9.0   | 6.0   | 10.3  | 0.0  |
| 21UR-39640 | 73.0   | 15.0 | 47.0  | 18.0  | 25.0  | 0.0  |
| 21UR-39650 | 37.0   | 8.0  | 24.0  | 6.0   | 7.0   | 0.0  |
| 21UR-39660 | 1.0    | 0.0  | 4.0   | 0.0   | 0.0   | 0.0  |
| 21UR-39670 | 70.0   | 72.0 | 52.1  | 8.0   | 84.0  | 0.0  |
| 21UR-39680 | 0.0    | 3.0  | 0.0   | 4.0   | 4.0   | 0.0  |
| 21UR-39690 | 12.0   | 12.0 | 13.0  | 0.0   | 44.0  | 4.0  |
| 21UR-3970  | 53.0   | 27.0 | 67.0  | 28.0  | 47.0  | 6.0  |
| 21UR-39700 | 30.0   | 4.0  | 33.0  | 5.0   | 8.0   | 1.0  |
| 21UR-39710 | 24.0   | 0.0  | 19.0  | 1.0   | 0.0   | 0.0  |
| 21UR-39720 | 1089.0 | 94.0 | 732.0 | 341.0 | 197.5 | 17.0 |
| 21UR-39730 | 0.0    | 0.0  | 0.0   | 1.0   | 0.0   | 0.0  |
| 21UR-39740 | 0.0    | 0.0  | 0.0   | 1.0   | 0.0   | 0.0  |
| 21UR-39750 | 1.0    | 2.0  | 1.0   | 0.0   | 0.0   | 0.0  |
| 21UR-39760 | 0.0    | 3.0  | 6.0   | 0.0   | 8.0   | 0.0  |

|            |       |      |       |       |       |      |
|------------|-------|------|-------|-------|-------|------|
| 21UR-39770 | 11.0  | 1.0  | 4.0   | 1.0   | 9.0   | 0.0  |
| 21UR-39780 | 0.0   | 0.0  | 0.0   | 0.0   | 0.0   | 0.0  |
| 21UR-39790 | 49.0  | 1.0  | 27.0  | 7.0   | 4.0   | 0.0  |
| 21UR-3980  | 4.0   | 0.0  | 4.0   | 1.0   | 6.0   | 0.0  |
| 21UR-39800 | 0.0   | 0.0  | 0.0   | 0.0   | 0.0   | 0.0  |
| 21UR-39810 | 22.0  | 22.0 | 17.0  | 2.0   | 10.0  | 12.0 |
| 21UR-39820 | 0.0   | 0.0  | 1.0   | 0.0   | 0.0   | 0.0  |
| 21UR-39830 | 1.0   | 0.0  | 4.0   | 0.0   | 3.0   | 0.0  |
| 21UR-39840 | 0.0   | 0.0  | 0.0   | 0.0   | 0.0   | 0.0  |
| 21UR-39850 | 6.0   | 4.0  | 8.0   | 4.0   | 0.0   | 0.0  |
| 21UR-39860 | 1.0   | 0.0  | 1.0   | 0.0   | 0.0   | 1.0  |
| 21UR-39870 | 34.0  | 36.0 | 33.0  | 7.0   | 42.5  | 7.0  |
| 21UR-39880 | 10.0  | 4.0  | 10.0  | 4.0   | 7.0   | 0.0  |
| 21UR-39890 | 37.0  | 9.0  | 13.0  | 1.0   | 2.0   | 0.0  |
| 21UR-3990  | 60.0  | 2.0  | 39.0  | 16.0  | 6.0   | 0.0  |
| 21UR-39900 | 21.0  | 1.0  | 19.0  | 18.0  | 15.0  | 0.0  |
| 21UR-39910 | 4.0   | 4.0  | 1.0   | 1.0   | 4.0   | 0.0  |
| 21UR-39920 | 4.0   | 4.0  | 4.0   | 4.0   | 2.0   | 0.0  |
| 21UR-39930 | 0.0   | 1.0  | 1.0   | 0.0   | 0.0   | 0.0  |
| 21UR-39940 | 0.0   | 2.0  | 1.0   | 0.0   | 0.0   | 0.0  |
| 21UR-39950 | 0.0   | 1.0  | 0.0   | 0.0   | 2.0   | 1.0  |
| 21UR-39960 | 1.2   | 0.0  | 0.0   | 0.0   | 0.0   | 0.0  |
| 21UR-39970 | 0.0   | 0.0  | 0.0   | 0.0   | 0.0   | 0.0  |
| 21UR-39980 | 0.0   | 0.0  | 0.0   | 0.0   | 0.0   | 0.0  |
| 21UR-39990 | 0.0   | 0.0  | 0.0   | 1.0   | 1.0   | 0.0  |
| 21UR-40    | 0.0   | 0.0  | 0.0   | 0.0   | 0.0   | 0.0  |
| 21UR-400   | 2.0   | 1.0  | 5.0   | 6.0   | 2.0   | 0.0  |
| 21UR-4000  | 455.0 | 60.0 | 337.8 | 287.5 | 246.0 | 10.0 |
| 21UR-40000 | 20.0  | 3.0  | 11.0  | 1.0   | 1.0   | 0.0  |
| 21UR-40010 | 0.0   | 0.0  | 0.0   | 0.0   | 0.0   | 0.0  |
| 21UR-40020 | 0.0   | 0.0  | 0.0   | 0.0   | 0.0   | 0.0  |
| 21UR-40030 | 0.0   | 0.0  | 0.0   | 0.0   | 1.0   | 0.0  |
| 21UR-40040 | 768.0 | 43.0 | 543.0 | 137.0 | 50.0  | 6.0  |
| 21UR-40050 | 3.0   | 1.0  | 1.0   | 0.0   | 2.0   | 1.0  |
| 21UR-40060 | 0.0   | 0.0  | 0.0   | 0.0   | 0.0   | 0.0  |
| 21UR-40070 | 4.0   | 0.0  | 1.0   | 0.0   | 1.0   | 0.0  |
| 21UR-40080 | 1.0   | 1.0  | 0.0   | 0.0   | 0.0   | 0.0  |
| 21UR-40090 | 177.0 | 5.0  | 153.0 | 12.0  | 13.0  | 4.0  |
| 21UR-4010  | 1.0   | 0.0  | 1.0   | 0.0   | 0.0   | 0.0  |
| 21UR-40100 | 0.0   | 0.0  | 0.0   | 0.0   | 0.0   | 0.0  |
| 21UR-40110 | 23.0  | 1.0  | 37.0  | 9.0   | 1.0   | 0.0  |
| 21UR-40120 | 0.0   | 1.0  | 0.0   | 0.0   | 1.0   | 0.0  |
| 21UR-40130 | 0.0   | 0.0  | 0.0   | 0.0   | 0.0   | 0.0  |
| 21UR-40140 | 58.0  | 30.0 | 54.5  | 31.0  | 42.5  | 0.0  |
| 21UR-40150 | 0.0   | 0.0  | 0.0   | 0.0   | 0.0   | 0.0  |
| 21UR-40160 | 4.0   | 0.0  | 6.0   | 0.0   | 4.0   | 0.0  |
| 21UR-40170 | 0.0   | 1.0  | 0.0   | 0.0   | 0.0   | 0.0  |
| 21UR-40180 | 0.0   | 1.0  | 0.0   | 1.0   | 1.0   | 0.0  |
| 21UR-40190 | 0.0   | 0.0  | 0.0   | 0.0   | 1.0   | 0.0  |
| 21UR-4020  | 4.0   | 0.0  | 3.5   | 0.0   | 1.0   | 0.0  |
| 21UR-40200 | 0.0   | 0.0  | 0.0   | 0.0   | 0.0   | 0.0  |

|            |       |       |       |       |      |      |
|------------|-------|-------|-------|-------|------|------|
| 21UR-40210 | 26.0  | 8.0   | 17.0  | 13.0  | 11.0 | 0.0  |
| 21UR-40220 | 0.0   | 3.0   | 1.0   | 0.0   | 8.0  | 6.0  |
| 21UR-40230 | 0.0   | 1.0   | 1.0   | 1.0   | 0.0  | 0.0  |
| 21UR-40240 | 0.0   | 0.0   | 0.0   | 0.0   | 0.0  | 0.0  |
| 21UR-40250 | 0.0   | 1.0   | 1.0   | 0.0   | 2.0  | 0.0  |
| 21UR-40260 | 4.0   | 0.0   | 6.0   | 1.0   | 0.0  | 1.0  |
| 21UR-40270 | 199.0 | 28.0  | 175.0 | 40.0  | 48.0 | 7.0  |
| 21UR-40280 | 0.0   | 4.0   | 10.0  | 1.0   | 1.0  | 1.0  |
| 21UR-40290 | 0.0   | 10.0  | 1.0   | 0.0   | 12.0 | 1.0  |
| 21UR-4030  | 1.0   | 0.0   | 0.0   | 0.0   | 0.0  | 1.0  |
| 21UR-40300 | 0.0   | 0.0   | 0.0   | 1.0   | 0.0  | 0.0  |
| 21UR-40310 | 484.0 | 100.0 | 519.0 | 80.0  | 58.8 | 24.0 |
| 21UR-40320 | 9.0   | 6.0   | 8.0   | 5.0   | 4.0  | 2.0  |
| 21UR-40330 | 0.0   | 0.0   | 0.0   | 0.0   | 0.0  | 0.0  |
| 21UR-40340 | 1.0   | 0.0   | 0.0   | 0.0   | 4.0  | 0.0  |
| 21UR-40350 | 4.0   | 0.0   | 6.0   | 0.0   | 0.0  | 1.0  |
| 21UR-40360 | 0.0   | 0.0   | 0.0   | 0.0   | 0.0  | 0.0  |
| 21UR-40370 | 21.0  | 1.0   | 16.0  | 6.0   | 1.0  | 1.0  |
| 21UR-40380 | 8.0   | 1.0   | 16.0  | 5.0   | 17.0 | 3.0  |
| 21UR-40390 | 6.0   | 0.0   | 3.0   | 0.0   | 1.0  | 0.0  |
| 21UR-4040  | 101.0 | 1.0   | 77.0  | 28.0  | 3.0  | 1.0  |
| 21UR-40400 | 0.0   | 0.0   | 0.0   | 0.0   | 0.0  | 0.0  |
| 21UR-40410 | 20.0  | 16.0  | 12.0  | 4.0   | 35.0 | 1.0  |
| 21UR-40420 | 1.0   | 0.0   | 1.0   | 0.0   | 6.0  | 0.0  |
| 21UR-40430 | 0.0   | 0.0   | 0.0   | 0.0   | 0.0  | 0.0  |
| 21UR-40440 | 14.0  | 0.0   | 6.0   | 0.0   | 0.0  | 0.0  |
| 21UR-40450 | 18.0  | 6.0   | 10.0  | 0.0   | 6.0  | 0.0  |
| 21UR-40460 | 0.0   | 0.0   | 0.0   | 0.0   | 0.0  | 0.0  |
| 21UR-40470 | 0.0   | 0.0   | 0.0   | 0.0   | 0.0  | 0.0  |
| 21UR-40480 | 0.0   | 0.0   | 0.0   | 1.0   | 0.0  | 0.0  |
| 21UR-40490 | 1.0   | 6.0   | 6.0   | 1.0   | 5.0  | 0.0  |
| 21UR-4050  | 14.0  | 8.0   | 6.0   | 1.0   | 11.0 | 3.0  |
| 21UR-40500 | 3.0   | 0.0   | 1.0   | 0.0   | 0.0  | 0.0  |
| 21UR-40510 | 0.0   | 0.0   | 0.0   | 0.0   | 0.0  | 0.0  |
| 21UR-40520 | 4.0   | 0.0   | 4.0   | 1.0   | 1.0  | 0.0  |
| 21UR-40530 | 0.0   | 0.0   | 0.0   | 0.0   | 0.0  | 0.0  |
| 21UR-40540 | 0.0   | 0.0   | 0.0   | 0.0   | 0.3  | 0.0  |
| 21UR-40550 | 0.0   | 2.0   | 0.0   | 0.0   | 5.0  | 0.0  |
| 21UR-40560 | 1.0   | 0.0   | 0.0   | 0.0   | 0.0  | 1.0  |
| 21UR-40580 | 83.0  | 84.0  | 62.0  | 22.0  | 15.5 | 4.0  |
| 21UR-40590 | 0.0   | 4.0   | 1.0   | 1.0   | 3.0  | 0.0  |
| 21UR-4060  | 0.0   | 0.0   | 1.0   | 0.0   | 0.0  | 0.0  |
| 21UR-40600 | 0.0   | 0.0   | 0.0   | 0.0   | 0.0  | 0.0  |
| 21UR-40610 | 4.0   | 9.0   | 0.0   | 0.0   | 8.0  | 0.0  |
| 21UR-40620 | 39.0  | 5.0   | 66.0  | 10.0  | 20.0 | 0.0  |
| 21UR-40630 | 356.0 | 14.0  | 313.0 | 128.0 | 36.0 | 5.0  |
| 21UR-40640 | 24.0  | 4.0   | 34.0  | 6.0   | 10.0 | 0.0  |
| 21UR-40650 | 12.0  | 3.0   | 20.0  | 1.0   | 1.0  | 1.0  |
| 21UR-40660 | 1.0   | 1.0   | 0.0   | 0.0   | 4.0  | 1.0  |
| 21UR-40670 | 44.0  | 26.0  | 60.0  | 22.0  | 51.0 | 8.0  |
| 21UR-40680 | 0.0   | 0.0   | 1.0   | 0.0   | 0.0  | 0.0  |

|            |       |      |       |       |       |      |
|------------|-------|------|-------|-------|-------|------|
| 21UR-40690 | 0.0   | 1.0  | 0.0   | 0.0   | 0.0   | 0.0  |
| 21UR-4070  | 4.0   | 1.0  | 4.0   | 4.0   | 6.0   | 0.0  |
| 21UR-40700 | 0.0   | 1.0  | 0.0   | 0.0   | 0.0   | 0.0  |
| 21UR-40710 | 15.0  | 2.0  | 12.0  | 4.0   | 0.0   | 1.0  |
| 21UR-40720 | 0.0   | 0.0  | 0.0   | 0.0   | 0.0   | 0.0  |
| 21UR-40730 | 69.0  | 14.0 | 76.0  | 25.0  | 3.0   | 0.0  |
| 21UR-40740 | 0.0   | 0.0  | 0.0   | 0.0   | 1.0   | 0.0  |
| 21UR-40750 | 0.0   | 0.0  | 0.0   | 0.0   | 0.0   | 0.0  |
| 21UR-40760 | 0.0   | 0.0  | 0.0   | 0.0   | 0.0   | 0.0  |
| 21UR-40770 | 0.0   | 1.0  | 0.0   | 0.0   | 4.0   | 0.0  |
| 21UR-40780 | 41.0  | 32.0 | 17.0  | 6.0   | 43.0  | 7.0  |
| 21UR-40790 | 10.0  | 25.0 | 10.0  | 6.0   | 92.0  | 6.0  |
| 21UR-4080  | 0.0   | 0.0  | 0.0   | 0.0   | 0.0   | 0.0  |
| 21UR-40800 | 0.0   | 4.0  | 4.0   | 0.0   | 6.0   | 1.0  |
| 21UR-40810 | 0.0   | 0.0  | 0.0   | 0.0   | 1.0   | 0.0  |
| 21UR-40820 | 0.0   | 0.0  | 0.0   | 0.0   | 0.0   | 0.0  |
| 21UR-40830 | 0.0   | 0.0  | 0.0   | 0.0   | 0.0   | 0.0  |
| 21UR-40840 | 1.0   | 0.0  | 0.0   | 1.0   | 0.0   | 0.0  |
| 21UR-40850 | 104.0 | 82.0 | 150.0 | 64.0  | 249.0 | 13.0 |
| 21UR-40860 | 9.0   | 2.0  | 19.0  | 3.0   | 22.0  | 1.0  |
| 21UR-40870 | 0.0   | 0.5  | 0.0   | 0.0   | 0.0   | 0.0  |
| 21UR-40880 | 0.0   | 1.0  | 1.0   | 0.0   | 6.0   | 0.0  |
| 21UR-4090  | 0.0   | 0.0  | 0.0   | 1.0   | 0.0   | 0.0  |
| 21UR-40900 | 0.0   | 0.0  | 0.0   | 0.0   | 0.0   | 0.0  |
| 21UR-40910 | 14.0  | 6.0  | 7.0   | 10.0  | 1.0   | 0.0  |
| 21UR-40920 | 0.0   | 0.0  | 0.0   | 0.0   | 0.0   | 0.0  |
| 21UR-40930 | 8.0   | 10.0 | 1.0   | 2.0   | 15.0  | 3.0  |
| 21UR-40940 | 0.0   | 0.0  | 1.0   | 1.0   | 0.0   | 0.0  |
| 21UR-40950 | 0.0   | 0.0  | 0.0   | 0.0   | 1.0   | 0.0  |
| 21UR-40960 | 4.0   | 0.0  | 1.0   | 1.0   | 0.0   | 0.0  |
| 21UR-40970 | 20.0  | 39.0 | 12.0  | 4.0   | 73.3  | 3.0  |
| 21UR-40980 | 1.0   | 0.0  | 0.0   | 0.0   | 0.0   | 0.0  |
| 21UR-40990 | 0.0   | 0.0  | 1.0   | 0.0   | 1.0   | 0.0  |
| 21UR-410   | 0.0   | 0.0  | 0.0   | 0.0   | 1.0   | 0.0  |
| 21UR-4100  | 0.0   | 0.0  | 0.0   | 0.0   | 0.0   | 0.0  |
| 21UR-41000 | 0.0   | 0.0  | 0.0   | 0.0   | 0.0   | 0.0  |
| 21UR-41010 | 2.0   | 0.0  | 0.0   | 0.0   | 4.0   | 0.0  |
| 21UR-41020 | 8.0   | 1.0  | 20.0  | 2.0   | 5.0   | 0.0  |
| 21UR-41030 | 18.0  | 0.0  | 3.0   | 1.0   | 0.0   | 0.0  |
| 21UR-41040 | 0.0   | 0.0  | 0.0   | 0.0   | 0.0   | 0.0  |
| 21UR-41050 | 1.0   | 0.0  | 3.0   | 0.0   | 0.0   | 0.0  |
| 21UR-41060 | 4.0   | 0.0  | 1.0   | 0.0   | 1.0   | 0.0  |
| 21UR-41070 | 14.0  | 10.0 | 10.0  | 3.0   | 9.0   | 0.0  |
| 21UR-41080 | 18.5  | 27.0 | 23.0  | 11.0  | 11.5  | 4.0  |
| 21UR-41090 | 0.0   | 0.0  | 0.0   | 0.0   | 0.0   | 0.0  |
| 21UR-4110  | 0.0   | 0.0  | 0.0   | 0.0   | 0.0   | 0.0  |
| 21UR-41100 | 379.0 | 74.0 | 436.0 | 237.0 | 102.5 | 16.0 |
| 21UR-41110 | 0.0   | 1.0  | 1.0   | 0.0   | 0.0   | 0.0  |
| 21UR-41120 | 0.0   | 0.0  | 0.0   | 0.0   | 0.0   | 0.0  |
| 21UR-41130 | 0.0   | 0.0  | 0.0   | 0.0   | 0.0   | 0.0  |
| 21UR-41140 | 0.0   | 0.0  | 0.0   | 0.0   | 0.0   | 0.0  |

|            |        |        |        |        |        |       |
|------------|--------|--------|--------|--------|--------|-------|
| 21UR-41150 | 0.0    | 0.0    | 4.0    | 0.0    | 7.0    | 0.0   |
| 21UR-41160 | 1.0    | 0.0    | 0.0    | 0.0    | 1.0    | 0.0   |
| 21UR-41170 | 0.0    | 0.0    | 1.0    | 0.0    | 1.0    | 0.0   |
| 21UR-41180 | 1.0    | 6.0    | 2.0    | 1.0    | 10.0   | 1.0   |
| 21UR-41190 | 2.0    | 1.0    | 1.0    | 4.0    | 1.0    | 0.0   |
| 21UR-4120  | 0.0    | 0.0    | 0.0    | 1.0    | 0.0    | 0.0   |
| 21UR-41200 | 0.0    | 1.0    | 0.0    | 0.0    | 1.0    | 0.0   |
| 21UR-41210 | 0.0    | 0.0    | 0.0    | 0.0    | 1.0    | 0.0   |
| 21UR-41220 | 1.0    | 4.0    | 0.0    | 0.0    | 0.0    | 0.0   |
| 21UR-41230 | 0.0    | 0.0    | 0.0    | 0.0    | 0.0    | 0.0   |
| 21UR-41250 | 4.0    | 1.0    | 1.0    | 4.0    | 0.0    | 0.0   |
| 21UR-41260 | 17.0   | 0.0    | 11.0   | 3.0    | 2.0    | 0.0   |
| 21UR-41270 | 0.0    | 0.0    | 0.0    | 0.0    | 0.0    | 0.0   |
| 21UR-41280 | 0.0    | 0.0    | 0.0    | 0.0    | 0.0    | 0.0   |
| 21UR-41290 | 6.0    | 0.0    | 8.0    | 1.0    | 1.0    | 0.0   |
| 21UR-4130  | 0.0    | 4.0    | 1.0    | 0.0    | 0.0    | 0.0   |
| 21UR-41300 | 1.0    | 0.0    | 0.0    | 0.0    | 0.0    | 0.0   |
| 21UR-41310 | 0.0    | 1.0    | 0.0    | 0.0    | 0.0    | 0.0   |
| 21UR-41320 | 0.0    | 0.0    | 0.0    | 1.0    | 0.0    | 0.0   |
| 21UR-41330 | 13.0   | 2.0    | 3.0    | 1.0    | 0.0    | 0.0   |
| 21UR-41340 | 0.0    | 4.0    | 2.0    | 0.0    | 4.0    | 0.0   |
| 21UR-41350 | 0.0    | 0.0    | 0.0    | 0.0    | 0.0    | 0.0   |
| 21UR-41360 | 12.0   | 7.0    | 2.0    | 1.0    | 4.0    | 4.0   |
| 21UR-41370 | 71.0   | 7.0    | 67.0   | 23.0   | 10.0   | 0.0   |
| 21UR-41380 | 5.0    | 4.0    | 2.0    | 4.0    | 4.0    | 0.0   |
| 21UR-41390 | 0.0    | 1.0    | 0.0    | 0.0    | 0.0    | 0.0   |
| 21UR-4140  | 0.0    | 0.0    | 0.0    | 0.0    | 0.0    | 0.0   |
| 21UR-41400 | 2.0    | 0.0    | 1.0    | 0.0    | 0.0    | 0.0   |
| 21UR-41410 | 18.0   | 1.0    | 20.0   | 4.0    | 1.0    | 1.0   |
| 21UR-41420 | 0.0    | 0.0    | 0.0    | 0.0    | 0.0    | 0.0   |
| 21UR-41430 | 1.0    | 0.0    | 1.0    | 0.0    | 0.0    | 0.0   |
| 21UR-41440 | 6.0    | 1.0    | 8.0    | 0.0    | 0.0    | 0.0   |
| 21UR-41450 | 6.0    | 0.0    | 18.0   | 6.0    | 1.0    | 0.0   |
| 21UR-41460 | 25.0   | 18.0   | 20.0   | 6.0    | 37.0   | 14.0  |
| 21UR-41470 | 14.0   | 2.0    | 12.0   | 4.0    | 0.0    | 1.0   |
| 21UR-41480 | 12.0   | 1.0    | 10.0   | 8.0    | 7.0    | 0.0   |
| 21UR-41490 | 0.0    | 3.0    | 4.0    | 0.0    | 4.0    | 0.0   |
| 21UR-41500 | 0.0    | 0.0    | 0.0    | 0.0    | 1.1    | 0.0   |
| 21UR-41510 | 0.0    | 0.0    | 0.0    | 0.0    | 0.0    | 0.0   |
| 21UR-41520 | 29.0   | 1.0    | 24.0   | 4.0    | 0.0    | 0.0   |
| 21UR-41530 | 1.0    | 0.0    | 0.0    | 0.0    | 0.0    | 0.0   |
| 21UR-41540 | 0.0    | 0.0    | 0.0    | 0.0    | 1.0    | 0.0   |
| 21UR-41550 | 0.0    | 0.0    | 0.0    | 0.0    | 1.0    | 1.0   |
| 21UR-41560 | 0.0    | 0.0    | 0.0    | 0.0    | 0.0    | 0.0   |
| 21UR-41570 | 46.0   | 51.0   | 66.0   | 22.0   | 20.0   | 1.0   |
| 21UR-41580 | 0.0    | 0.0    | 0.0    | 0.0    | 0.0    | 0.0   |
| 21UR-41590 | 6.0    | 3.0    | 0.0    | 0.0    | 10.0   | 2.0   |
| 21UR-4160  | 0.0    | 4.0    | 0.0    | 0.0    | 4.0    | 1.0   |
| 21UR-41600 | 0.0    | 0.0    | 0.0    | 0.0    | 0.0    | 0.0   |
| 21UR-41610 | 0.0    | 0.0    | 0.0    | 0.0    | 0.0    | 0.0   |
| 21UR-41620 | 8651.8 | 2884.0 | 6134.3 | 2616.0 | 2130.5 | 313.0 |

|            |       |       |       |      |      |      |
|------------|-------|-------|-------|------|------|------|
| 21UR-41630 | 12.0  | 10.0  | 10.0  | 2.0  | 11.0 | 1.0  |
| 21UR-41640 | 0.0   | 0.0   | 0.0   | 0.0  | 0.0  | 1.0  |
| 21UR-41650 | 0.0   | 1.0   | 1.0   | 0.0  | 0.0  | 0.0  |
| 21UR-41660 | 4.0   | 5.0   | 0.0   | 2.0  | 6.0  | 0.0  |
| 21UR-41670 | 0.0   | 1.0   | 0.0   | 0.0  | 0.0  | 0.0  |
| 21UR-41680 | 4.0   | 0.0   | 0.0   | 0.0  | 0.0  | 0.0  |
| 21UR-41690 | 0.0   | 0.0   | 0.0   | 0.0  | 0.0  | 0.0  |
| 21UR-4170  | 10.0  | 3.0   | 16.0  | 1.0  | 2.0  | 4.0  |
| 21UR-41700 | 2.0   | 1.0   | 8.0   | 0.0  | 1.0  | 0.0  |
| 21UR-41710 | 0.0   | 0.0   | 0.0   | 0.0  | 0.0  | 0.0  |
| 21UR-41720 | 0.0   | 0.0   | 0.0   | 0.0  | 0.0  | 0.0  |
| 21UR-41730 | 9.0   | 7.0   | 10.0  | 0.0  | 13.0 | 4.0  |
| 21UR-41740 | 0.0   | 0.0   | 0.0   | 0.0  | 0.0  | 0.0  |
| 21UR-41750 | 34.0  | 4.0   | 52.0  | 6.0  | 12.0 | 3.0  |
| 21UR-41760 | 0.0   | 0.0   | 0.0   | 0.0  | 1.0  | 0.0  |
| 21UR-41770 | 0.0   | 0.0   | 0.0   | 0.0  | 0.0  | 0.0  |
| 21UR-41780 | 4.0   | 1.0   | 2.0   | 1.0  | 3.0  | 0.0  |
| 21UR-41790 | 0.0   | 0.0   | 0.0   | 0.0  | 0.0  | 0.0  |
| 21UR-4180  | 9.0   | 11.0  | 4.0   | 4.0  | 9.0  | 3.0  |
| 21UR-41800 | 40.0  | 3.0   | 19.0  | 14.0 | 1.0  | 0.0  |
| 21UR-41810 | 28.0  | 14.3  | 29.0  | 9.0  | 60.7 | 0.0  |
| 21UR-41820 | 0.0   | 0.0   | 0.0   | 0.0  | 0.0  | 0.0  |
| 21UR-41830 | 4.0   | 4.0   | 0.0   | 0.0  | 0.0  | 1.0  |
| 21UR-41840 | 0.0   | 0.0   | 4.0   | 1.0  | 1.0  | 0.0  |
| 21UR-41850 | 117.0 | 127.3 | 96.0  | 27.0 | 95.5 | 22.0 |
| 21UR-41860 | 33.0  | 16.0  | 47.0  | 9.0  | 23.0 | 2.0  |
| 21UR-41870 | 12.0  | 1.0   | 8.0   | 0.0  | 1.0  | 0.0  |
| 21UR-41880 | 10.0  | 5.0   | 4.0   | 4.0  | 9.0  | 0.0  |
| 21UR-41890 | 0.0   | 0.0   | 0.0   | 0.0  | 0.0  | 0.0  |
| 21UR-4190  | 25.0  | 0.0   | 12.0  | 10.0 | 0.0  | 0.0  |
| 21UR-41900 | 0.0   | 0.0   | 0.0   | 0.0  | 0.0  | 0.0  |
| 21UR-41910 | 48.0  | 10.0  | 29.0  | 8.0  | 3.0  | 0.0  |
| 21UR-41920 | 0.0   | 6.0   | 4.0   | 0.0  | 7.0  | 0.0  |
| 21UR-41930 | 0.0   | 1.0   | 1.0   | 0.0  | 0.0  | 0.0  |
| 21UR-41940 | 4.0   | 2.0   | 4.0   | 1.0  | 1.0  | 4.0  |
| 21UR-41950 | 0.0   | 0.0   | 1.0   | 0.0  | 0.0  | 0.0  |
| 21UR-41960 | 43.0  | 17.0  | 50.0  | 32.0 | 38.0 | 1.0  |
| 21UR-41970 | 52.0  | 11.0  | 44.5  | 43.0 | 13.0 | 1.0  |
| 21UR-41980 | 15.0  | 5.0   | 8.0   | 6.0  | 36.0 | 0.0  |
| 21UR-41990 | 77.0  | 16.0  | 54.0  | 15.0 | 28.0 | 4.0  |
| 21UR-420   | 0.0   | 0.0   | 0.0   | 0.0  | 0.0  | 0.0  |
| 21UR-4200  | 0.0   | 4.0   | 0.0   | 0.0  | 0.0  | 0.0  |
| 21UR-42000 | 1.0   | 0.0   | 0.0   | 0.0  | 0.0  | 0.0  |
| 21UR-42010 | 1.0   | 1.0   | 1.0   | 0.0  | 0.0  | 0.0  |
| 21UR-42020 | 0.0   | 0.0   | 0.0   | 0.0  | 0.0  | 1.0  |
| 21UR-42030 | 0.0   | 0.0   | 0.0   | 0.0  | 0.0  | 0.0  |
| 21UR-42040 | 196.0 | 22.0  | 172.0 | 69.7 | 47.7 | 3.0  |
| 21UR-42050 | 0.0   | 0.0   | 0.0   | 0.0  | 0.0  | 0.0  |
| 21UR-42060 | 0.0   | 0.0   | 0.0   | 0.0  | 0.0  | 0.0  |
| 21UR-42070 | 0.0   | 1.0   | 0.0   | 0.0  | 0.0  | 1.0  |
| 21UR-42080 | 10.0  | 0.0   | 6.0   | 0.0  | 1.0  | 1.0  |

|            |       |      |       |       |      |      |
|------------|-------|------|-------|-------|------|------|
| 21UR-42090 | 0.0   | 0.0  | 0.0   | 0.0   | 0.0  | 0.0  |
| 21UR-4210  | 480.0 | 58.0 | 354.0 | 118.0 | 38.0 | 11.0 |
| 21UR-42100 | 0.0   | 0.0  | 0.0   | 0.0   | 1.0  | 0.0  |
| 21UR-42110 | 0.0   | 0.0  | 0.0   | 0.0   | 0.0  | 0.0  |
| 21UR-42120 | 0.0   | 0.0  | 0.0   | 0.0   | 0.0  | 0.0  |
| 21UR-42130 | 0.0   | 0.0  | 0.0   | 0.0   | 0.0  | 0.0  |
| 21UR-42140 | 0.0   | 2.0  | 0.0   | 0.0   | 1.0  | 1.0  |
| 21UR-42150 | 1.0   | 0.0  | 0.0   | 0.0   | 1.0  | 1.0  |
| 21UR-42160 | 8.0   | 4.0  | 9.0   | 4.0   | 5.0  | 0.0  |
| 21UR-42170 | 0.0   | 0.0  | 0.0   | 0.0   | 1.0  | 0.0  |
| 21UR-42180 | 9.0   | 6.0  | 5.0   | 4.0   | 10.0 | 2.0  |
| 21UR-42190 | 43.0  | 13.0 | 36.0  | 18.0  | 4.0  | 2.0  |
| 21UR-4220  | 4.0   | 0.0  | 0.0   | 0.0   | 0.0  | 0.0  |
| 21UR-42200 | 0.0   | 0.0  | 0.0   | 0.0   | 0.0  | 0.0  |
| 21UR-42210 | 18.0  | 9.0  | 27.0  | 1.0   | 10.0 | 1.0  |
| 21UR-42220 | 88.0  | 23.0 | 51.0  | 40.0  | 39.0 | 4.0  |
| 21UR-42230 | 1.0   | 0.0  | 0.0   | 0.0   | 0.0  | 0.0  |
| 21UR-42240 | 0.0   | 2.0  | 0.0   | 0.0   | 0.0  | 0.0  |
| 21UR-42250 | 32.0  | 16.0 | 37.0  | 12.0  | 22.0 | 1.0  |
| 21UR-42260 | 0.0   | 0.0  | 0.0   | 0.0   | 0.0  | 0.0  |
| 21UR-42270 | 0.0   | 0.0  | 0.0   | 0.0   | 0.0  | 0.0  |
| 21UR-42280 | 4.0   | 22.0 | 10.0  | 1.0   | 19.0 | 4.0  |
| 21UR-42290 | 1.0   | 6.0  | 1.0   | 1.0   | 0.0  | 0.0  |
| 21UR-4230  | 6.0   | 4.0  | 6.0   | 5.0   | 2.0  | 4.0  |
| 21UR-42300 | 48.0  | 12.0 | 73.0  | 21.0  | 31.0 | 4.0  |
| 21UR-42310 | 6.0   | 0.0  | 1.0   | 1.0   | 3.0  | 0.0  |
| 21UR-42320 | 0.0   | 0.0  | 0.0   | 0.0   | 0.0  | 0.0  |
| 21UR-42330 | 70.0  | 4.0  | 70.0  | 17.0  | 16.0 | 0.0  |
| 21UR-42340 | 0.0   | 0.0  | 0.0   | 1.0   | 1.0  | 0.0  |
| 21UR-42350 | 0.0   | 3.0  | 1.0   | 0.0   | 0.0  | 1.0  |
| 21UR-42360 | 0.0   | 0.0  | 0.0   | 1.0   | 0.0  | 0.0  |
| 21UR-42370 | 0.0   | 0.0  | 1.0   | 1.0   | 1.0  | 0.0  |
| 21UR-42380 | 18.0  | 7.0  | 29.0  | 14.0  | 40.0 | 3.0  |
| 21UR-42390 | 0.0   | 0.0  | 0.0   | 0.0   | 0.0  | 0.0  |
| 21UR-4240  | 4.0   | 0.0  | 1.0   | 0.0   | 0.0  | 0.0  |
| 21UR-42400 | 0.0   | 0.0  | 0.0   | 0.0   | 8.0  | 0.0  |
| 21UR-42410 | 0.0   | 1.0  | 0.0   | 0.0   | 0.0  | 0.0  |
| 21UR-42420 | 0.0   | 0.0  | 0.0   | 0.0   | 0.0  | 0.0  |
| 21UR-42430 | 0.0   | 0.0  | 0.0   | 0.0   | 0.0  | 0.0  |
| 21UR-42440 | 1.0   | 1.0  | 0.0   | 0.0   | 0.0  | 1.0  |
| 21UR-42450 | 0.0   | 0.0  | 0.0   | 0.0   | 0.0  | 0.0  |
| 21UR-42460 | 1.0   | 1.0  | 4.0   | 1.0   | 0.0  | 0.0  |
| 21UR-42470 | 0.0   | 0.0  | 0.0   | 0.0   | 0.0  | 0.0  |
| 21UR-42480 | 27.0  | 13.0 | 28.0  | 13.0  | 12.0 | 1.0  |
| 21UR-42490 | 0.0   | 0.0  | 0.0   | 0.0   | 0.0  | 0.0  |
| 21UR-4250  | 0.0   | 1.0  | 1.0   | 0.0   | 1.0  | 0.0  |
| 21UR-42500 | 8.0   | 0.0  | 9.0   | 0.0   | 0.0  | 0.0  |
| 21UR-42510 | 1.0   | 3.0  | 4.0   | 0.0   | 2.0  | 0.0  |
| 21UR-42520 | 8.0   | 8.0  | 2.0   | 1.0   | 1.0  | 0.0  |
| 21UR-42530 | 32.0  | 1.0  | 41.0  | 15.0  | 4.0  | 0.0  |
| 21UR-42540 | 3.0   | 1.0  | 1.0   | 0.0   | 0.0  | 1.0  |

|            |       |       |       |       |       |      |
|------------|-------|-------|-------|-------|-------|------|
| 21UR-42550 | 1.0   | 0.0   | 1.0   | 1.0   | 0.0   | 0.0  |
| 21UR-42570 | 1.0   | 0.0   | 4.0   | 0.0   | 0.0   | 0.0  |
| 21UR-42580 | 10.0  | 1.0   | 3.0   | 0.0   | 4.0   | 0.0  |
| 21UR-42590 | 0.0   | 0.0   | 1.0   | 0.0   | 1.0   | 0.0  |
| 21UR-4260  | 12.0  | 4.0   | 15.0  | 8.0   | 9.0   | 0.0  |
| 21UR-42600 | 0.0   | 0.0   | 0.0   | 0.0   | 0.0   | 0.0  |
| 21UR-42610 | 1.0   | 3.0   | 5.0   | 0.5   | 3.0   | 2.0  |
| 21UR-42620 | 142.0 | 38.0  | 119.0 | 38.0  | 114.3 | 6.0  |
| 21UR-42630 | 0.0   | 0.0   | 0.0   | 0.0   | 0.0   | 0.0  |
| 21UR-42640 | 471.0 | 77.0  | 449.0 | 177.5 | 99.0  | 11.0 |
| 21UR-42650 | 0.0   | 1.0   | 1.0   | 0.0   | 0.0   | 0.0  |
| 21UR-42660 | 0.0   | 0.0   | 0.0   | 0.0   | 0.0   | 0.0  |
| 21UR-42670 | 0.0   | 0.0   | 1.0   | 0.0   | 0.0   | 0.0  |
| 21UR-42680 | 0.0   | 0.0   | 0.0   | 0.0   | 0.0   | 0.0  |
| 21UR-42690 | 0.0   | 0.0   | 0.0   | 0.0   | 0.0   | 0.0  |
| 21UR-4270  | 0.0   | 1.0   | 1.0   | 0.0   | 4.0   | 0.0  |
| 21UR-42700 | 0.0   | 0.0   | 0.0   | 0.0   | 0.0   | 0.0  |
| 21UR-42710 | 0.0   | 0.0   | 0.0   | 0.0   | 0.0   | 0.0  |
| 21UR-42720 | 0.0   | 3.0   | 0.0   | 1.0   | 0.0   | 0.0  |
| 21UR-42730 | 85.0  | 6.0   | 86.0  | 37.0  | 18.0  | 0.0  |
| 21UR-42740 | 14.0  | 2.1   | 17.0  | 6.0   | 4.0   | 0.0  |
| 21UR-42750 | 0.0   | 0.0   | 0.0   | 0.0   | 0.0   | 1.0  |
| 21UR-42760 | 0.0   | 0.0   | 0.0   | 0.0   | 0.0   | 0.0  |
| 21UR-42770 | 1.0   | 0.0   | 1.0   | 1.0   | 1.0   | 0.0  |
| 21UR-42790 | 653.5 | 58.0  | 567.0 | 217.0 | 126.5 | 6.0  |
| 21UR-4280  | 0.0   | 0.0   | 0.0   | 0.0   | 0.0   | 0.0  |
| 21UR-42800 | 7.0   | 0.0   | 1.0   | 1.0   | 4.0   | 0.0  |
| 21UR-42810 | 0.0   | 0.0   | 1.0   | 0.0   | 5.0   | 0.0  |
| 21UR-42820 | 0.0   | 1.0   | 1.0   | 0.0   | 0.0   | 0.0  |
| 21UR-42830 | 12.0  | 1.0   | 11.0  | 1.0   | 7.0   | 2.0  |
| 21UR-42840 | 2.0   | 5.0   | 0.0   | 2.0   | 5.0   | 0.0  |
| 21UR-42850 | 0.0   | 0.0   | 0.0   | 0.0   | 0.0   | 0.0  |
| 21UR-42860 | 49.0  | 45.0  | 43.0  | 18.0  | 23.0  | 2.0  |
| 21UR-42870 | 1.0   | 0.0   | 0.0   | 2.0   | 1.0   | 0.0  |
| 21UR-42880 | 0.0   | 1.0   | 0.0   | 0.0   | 3.0   | 0.0  |
| 21UR-42890 | 26.0  | 1.0   | 29.0  | 8.0   | 7.0   | 0.0  |
| 21UR-4290  | 4.0   | 1.0   | 1.0   | 0.0   | 3.0   | 0.0  |
| 21UR-42900 | 48.0  | 83.0  | 54.5  | 22.0  | 47.0  | 21.0 |
| 21UR-42910 | 4.0   | 1.0   | 7.0   | 1.0   | 0.0   | 0.0  |
| 21UR-42920 | 362.0 | 296.0 | 378.0 | 225.0 | 297.0 | 29.0 |
| 21UR-42930 | 0.0   | 0.0   | 0.0   | 0.0   | 1.0   | 0.0  |
| 21UR-42940 | 20.0  | 8.0   | 12.0  | 12.0  | 16.0  | 1.0  |
| 21UR-42950 | 0.0   | 0.0   | 0.0   | 0.0   | 0.0   | 0.0  |
| 21UR-42960 | 7.0   | 12.0  | 1.0   | 4.0   | 26.0  | 3.0  |
| 21UR-42970 | 0.0   | 1.0   | 0.0   | 0.0   | 0.0   | 0.0  |
| 21UR-42980 | 27.0  | 6.0   | 17.0  | 4.0   | 4.0   | 0.0  |
| 21UR-42990 | 1.0   | 0.0   | 1.0   | 1.0   | 0.0   | 0.0  |
| 21UR-430   | 1.0   | 3.0   | 1.0   | 0.0   | 1.0   | 0.0  |
| 21UR-4300  | 0.0   | 6.0   | 1.0   | 0.0   | 3.0   | 0.0  |
| 21UR-43000 | 8.0   | 3.0   | 31.0  | 16.0  | 8.0   | 1.0  |
| 21UR-43010 | 0.0   | 0.0   | 0.0   | 0.0   | 0.0   | 0.0  |



|            |       |       |       |       |       |      |
|------------|-------|-------|-------|-------|-------|------|
| 21UR-43020 | 1.0   | 0.0   | 0.0   | 0.0   | 0.0   | 1.0  |
| 21UR-43030 | 0.0   | 0.0   | 0.0   | 0.0   | 0.0   | 0.0  |
| 21UR-43040 | 55.0  | 5.0   | 23.0  | 8.0   | 1.0   | 0.0  |
| 21UR-43050 | 1.0   | 1.7   | 2.0   | 0.0   | 2.0   | 1.0  |
| 21UR-43060 | 0.0   | 4.0   | 2.0   | 1.0   | 2.0   | 0.0  |
| 21UR-43070 | 69.0  | 13.0  | 51.0  | 37.0  | 15.0  | 0.0  |
| 21UR-43080 | 14.0  | 0.0   | 3.0   | 0.0   | 6.0   | 1.0  |
| 21UR-43090 | 3.0   | 1.0   | 0.0   | 0.0   | 4.0   | 0.0  |
| 21UR-43100 | 0.0   | 0.0   | 0.0   | 1.0   | 1.0   | 0.0  |
| 21UR-43110 | 0.0   | 0.2   | 0.0   | 0.0   | 1.0   | 0.3  |
| 21UR-43120 | 0.0   | 2.0   | 0.0   | 1.0   | 0.0   | 1.0  |
| 21UR-43130 | 0.0   | 0.0   | 0.0   | 0.0   | 0.0   | 0.0  |
| 21UR-43140 | 4.0   | 14.0  | 4.0   | 1.0   | 0.0   | 4.0  |
| 21UR-43150 | 0.0   | 0.0   | 0.0   | 0.0   | 0.0   | 0.0  |
| 21UR-43160 | 0.0   | 0.2   | 0.0   | 0.0   | 0.0   | 0.0  |
| 21UR-43170 | 0.0   | 0.0   | 0.0   | 0.0   | 0.0   | 0.0  |
| 21UR-43180 | 0.0   | 0.0   | 0.0   | 0.0   | 0.0   | 0.0  |
| 21UR-43190 | 5.0   | 1.0   | 5.0   | 8.0   | 4.0   | 0.0  |
| 21UR-4320  | 0.0   | 0.0   | 0.0   | 0.0   | 0.0   | 0.0  |
| 21UR-43200 | 42.0  | 112.0 | 70.0  | 19.0  | 205.0 | 19.0 |
| 21UR-43210 | 0.0   | 0.0   | 1.0   | 0.0   | 1.0   | 0.0  |
| 21UR-43230 | 12.0  | 8.0   | 12.0  | 0.0   | 16.0  | 0.0  |
| 21UR-43240 | 20.0  | 1.0   | 14.0  | 4.0   | 4.0   | 0.0  |
| 21UR-43250 | 1.0   | 0.0   | 0.0   | 0.0   | 0.0   | 0.0  |
| 21UR-43260 | 0.0   | 0.0   | 0.0   | 0.0   | 0.0   | 0.0  |
| 21UR-43270 | 0.0   | 0.0   | 2.0   | 2.0   | 0.0   | 0.0  |
| 21UR-43280 | 0.0   | 0.1   | 0.0   | 0.0   | 6.0   | 0.0  |
| 21UR-43290 | 194.0 | 28.0  | 127.0 | 102.0 | 68.0  | 8.0  |
| 21UR-4330  | 19.0  | 2.0   | 23.0  | 12.0  | 6.0   | 0.0  |
| 21UR-43300 | 0.0   | 0.0   | 3.0   | 0.0   | 0.0   | 0.0  |
| 21UR-43310 | 0.0   | 0.0   | 0.0   | 0.0   | 0.0   | 0.0  |
| 21UR-43320 | 0.0   | 0.0   | 0.0   | 0.0   | 0.0   | 0.0  |
| 21UR-43330 | 223.0 | 29.0  | 166.0 | 70.0  | 16.0  | 4.0  |
| 21UR-43340 | 4.0   | 7.0   | 0.0   | 2.0   | 19.0  | 0.0  |
| 21UR-43350 | 0.0   | 0.0   | 0.0   | 0.0   | 0.0   | 0.0  |
| 21UR-43360 | 0.0   | 0.0   | 1.0   | 0.0   | 0.0   | 0.0  |
| 21UR-43370 | 0.0   | 0.0   | 3.0   | 1.0   | 0.0   | 0.0  |
| 21UR-43380 | 6.0   | 3.0   | 7.0   | 1.0   | 0.0   | 0.0  |
| 21UR-43390 | 0.0   | 0.0   | 0.0   | 0.0   | 0.0   | 0.0  |
| 21UR-4340  | 10.0  | 13.0  | 8.0   | 1.0   | 16.0  | 1.0  |
| 21UR-43400 | 16.0  | 1.0   | 6.0   | 13.0  | 0.0   | 1.0  |
| 21UR-43410 | 4.0   | 1.0   | 6.0   | 6.0   | 1.0   | 1.0  |
| 21UR-43430 | 5.0   | 0.0   | 9.0   | 3.0   | 0.0   | 1.0  |
| 21UR-43440 | 17.0  | 10.0  | 26.0  | 15.0  | 7.0   | 2.0  |
| 21UR-43450 | 0.0   | 0.0   | 0.0   | 0.0   | 0.0   | 1.0  |
| 21UR-43460 | 0.0   | 0.0   | 1.0   | 0.0   | 0.0   | 0.0  |
| 21UR-43470 | 0.0   | 2.0   | 3.0   | 0.0   | 7.0   | 0.0  |
| 21UR-43480 | 0.0   | 0.0   | 0.0   | 0.0   | 1.0   | 0.0  |
| 21UR-43490 | 126.0 | 3.0   | 104.0 | 23.0  | 14.0  | 0.0  |
| 21UR-4350  | 0.0   | 0.0   | 0.0   | 0.0   | 0.0   | 0.0  |
| 21UR-43500 | 1.0   | 6.0   | 1.0   | 0.0   | 16.0  | 0.0  |

|            |       |      |       |      |      |     |
|------------|-------|------|-------|------|------|-----|
| 21UR-43510 | 0.0   | 0.0  | 0.0   | 0.0  | 0.0  | 1.0 |
| 21UR-43520 | 7.0   | 1.0  | 2.0   | 0.0  | 2.0  | 0.0 |
| 21UR-43530 | 0.0   | 0.0  | 0.0   | 0.0  | 1.0  | 0.0 |
| 21UR-43540 | 0.0   | 0.0  | 0.0   | 0.0  | 0.0  | 0.0 |
| 21UR-43550 | 4.0   | 1.0  | 4.0   | 0.0  | 3.0  | 0.0 |
| 21UR-43560 | 12.0  | 2.6  | 9.0   | 2.0  | 1.0  | 0.0 |
| 21UR-43570 | 0.0   | 0.0  | 0.0   | 0.0  | 0.0  | 0.0 |
| 21UR-43580 | 4.0   | 8.0  | 12.0  | 6.0  | 4.0  | 0.0 |
| 21UR-43590 | 0.0   | 4.0  | 0.0   | 0.0  | 1.0  | 0.0 |
| 21UR-4360  | 44.0  | 11.0 | 65.0  | 15.0 | 18.0 | 0.0 |
| 21UR-43600 | 0.0   | 1.0  | 0.0   | 0.0  | 0.0  | 0.0 |
| 21UR-43610 | 1.0   | 2.1  | 2.0   | 0.0  | 8.0  | 4.0 |
| 21UR-43620 | 1.0   | 18.0 | 12.0  | 1.0  | 14.0 | 1.0 |
| 21UR-43630 | 0.0   | 0.0  | 0.0   | 0.0  | 0.0  | 0.0 |
| 21UR-43640 | 0.0   | 0.0  | 0.0   | 0.0  | 0.0  | 0.0 |
| 21UR-43650 | 4.0   | 0.0  | 4.0   | 0.0  | 0.0  | 0.0 |
| 21UR-43660 | 0.0   | 0.0  | 0.0   | 0.0  | 1.0  | 0.0 |
| 21UR-43670 | 6.0   | 0.0  | 0.0   | 0.0  | 1.1  | 0.0 |
| 21UR-43680 | 0.0   | 0.1  | 0.0   | 0.0  | 0.0  | 0.0 |
| 21UR-43690 | 29.0  | 27.0 | 33.0  | 7.0  | 52.2 | 2.0 |
| 21UR-4370  | 1.0   | 4.0  | 6.0   | 0.0  | 0.0  | 0.0 |
| 21UR-43700 | 6.0   | 0.0  | 6.0   | 2.0  | 14.0 | 0.0 |
| 21UR-43710 | 33.0  | 10.0 | 11.0  | 11.0 | 19.0 | 3.0 |
| 21UR-43720 | 1.0   | 1.0  | 4.0   | 4.0  | 9.0  | 1.0 |
| 21UR-43730 | 12.0  | 1.0  | 17.0  | 1.0  | 1.0  | 0.0 |
| 21UR-43740 | 8.0   | 1.0  | 4.0   | 4.0  | 3.0  | 1.0 |
| 21UR-43750 | 3.0   | 7.0  | 4.0   | 1.0  | 0.0  | 1.0 |
| 21UR-43760 | 0.0   | 0.0  | 0.0   | 0.0  | 0.0  | 0.0 |
| 21UR-43770 | 1.0   | 0.0  | 8.0   | 0.0  | 8.0  | 0.0 |
| 21UR-43780 | 0.0   | 0.0  | 0.0   | 0.0  | 2.0  | 1.0 |
| 21UR-43790 | 0.0   | 4.0  | 0.0   | 0.0  | 0.0  | 0.0 |
| 21UR-4380  | 0.0   | 1.0  | 0.0   | 0.0  | 4.0  | 0.0 |
| 21UR-43800 | 33.0  | 23.0 | 19.0  | 8.0  | 59.5 | 5.0 |
| 21UR-43810 | 0.0   | 0.0  | 0.0   | 0.0  | 0.0  | 0.0 |
| 21UR-43820 | 126.0 | 14.0 | 106.0 | 43.0 | 17.0 | 4.3 |
| 21UR-43830 | 0.0   | 0.0  | 0.0   | 0.0  | 0.0  | 0.0 |
| 21UR-43840 | 0.0   | 1.0  | 0.0   | 0.0  | 0.0  | 0.0 |
| 21UR-43850 | 135.0 | 28.0 | 106.0 | 39.0 | 21.0 | 1.0 |
| 21UR-43860 | 34.0  | 1.0  | 26.0  | 6.0  | 4.0  | 1.0 |
| 21UR-43870 | 1.0   | 2.0  | 0.0   | 1.0  | 1.0  | 0.0 |
| 21UR-43880 | 1.0   | 1.0  | 1.0   | 0.0  | 0.0  | 1.0 |
| 21UR-43890 | 84.0  | 14.0 | 59.0  | 19.0 | 17.0 | 0.0 |
| 21UR-4390  | 0.0   | 1.0  | 0.0   | 0.0  | 0.0  | 0.0 |
| 21UR-43910 | 0.0   | 0.0  | 0.0   | 0.0  | 0.0  | 0.0 |
| 21UR-43920 | 9.0   | 13.0 | 17.0  | 0.0  | 36.5 | 0.0 |
| 21UR-43930 | 2.0   | 0.0  | 1.0   | 1.0  | 8.0  | 0.0 |
| 21UR-43940 | 0.0   | 0.0  | 0.0   | 0.0  | 0.0  | 0.0 |
| 21UR-43950 | 0.0   | 0.0  | 0.0   | 0.0  | 0.0  | 0.0 |
| 21UR-43960 | 0.0   | 1.0  | 0.0   | 0.0  | 0.0  | 0.0 |
| 21UR-43970 | 1.0   | 2.0  | 0.0   | 0.0  | 2.0  | 1.0 |
| 21UR-43980 | 1.0   | 6.0  | 1.0   | 0.0  | 8.0  | 1.0 |

|            |       |       |       |      |       |      |
|------------|-------|-------|-------|------|-------|------|
| 21UR-43990 | 0.0   | 0.0   | 2.0   | 0.0  | 1.0   | 0.0  |
| 21UR-440   | 7.0   | 1.0   | 4.0   | 6.0  | 0.0   | 1.0  |
| 21UR-4400  | 0.0   | 1.0   | 0.0   | 1.0  | 0.0   | 0.0  |
| 21UR-44000 | 4.0   | 3.0   | 8.0   | 0.0  | 1.0   | 0.0  |
| 21UR-44010 | 10.0  | 5.0   | 0.0   | 0.0  | 0.0   | 0.0  |
| 21UR-44020 | 1.0   | 2.0   | 0.0   | 0.0  | 0.0   | 0.0  |
| 21UR-44030 | 0.0   | 1.0   | 0.0   | 1.0  | 10.0  | 0.0  |
| 21UR-44040 | 0.0   | 0.0   | 0.0   | 0.0  | 0.0   | 0.0  |
| 21UR-44050 | 44.0  | 4.0   | 15.0  | 11.0 | 6.0   | 0.0  |
| 21UR-44060 | 1.0   | 1.0   | 1.0   | 0.0  | 5.0   | 0.0  |
| 21UR-44070 | 12.0  | 0.0   | 2.0   | 6.0  | 0.0   | 0.0  |
| 21UR-44080 | 7.0   | 0.0   | 1.0   | 1.0  | 1.0   | 0.0  |
| 21UR-44090 | 0.0   | 1.0   | 0.0   | 0.0  | 0.0   | 0.0  |
| 21UR-4410  | 10.0  | 0.0   | 6.0   | 1.0  | 4.0   | 0.0  |
| 21UR-44100 | 0.0   | 1.0   | 0.0   | 0.0  | 0.0   | 0.0  |
| 21UR-44110 | 0.0   | 21.0  | 1.0   | 0.0  | 1.0   | 0.0  |
| 21UR-44120 | 0.0   | 0.0   | 0.0   | 0.0  | 0.0   | 0.0  |
| 21UR-44130 | 0.0   | 0.0   | 0.0   | 0.0  | 0.0   | 0.0  |
| 21UR-44140 | 0.0   | 0.0   | 0.0   | 0.0  | 0.0   | 0.0  |
| 21UR-44150 | 34.0  | 6.0   | 57.0  | 28.0 | 7.0   | 1.0  |
| 21UR-44160 | 0.0   | 0.0   | 0.0   | 0.0  | 0.0   | 0.0  |
| 21UR-44170 | 1.0   | 0.0   | 0.0   | 0.0  | 0.0   | 0.0  |
| 21UR-44180 | 48.0  | 23.7  | 51.0  | 20.0 | 17.0  | 8.0  |
| 21UR-44190 | 1.0   | 0.0   | 0.0   | 1.0  | 0.0   | 0.0  |
| 21UR-4420  | 0.0   | 0.0   | 0.0   | 0.0  | 0.0   | 0.0  |
| 21UR-44200 | 1.0   | 0.0   | 0.0   | 0.0  | 0.0   | 0.0  |
| 21UR-44210 | 5.0   | 0.0   | 3.0   | 1.0  | 10.0  | 0.0  |
| 21UR-44220 | 0.0   | 0.0   | 0.0   | 0.0  | 1.0   | 0.0  |
| 21UR-44230 | 2.0   | 0.0   | 4.0   | 0.0  | 1.0   | 1.0  |
| 21UR-44240 | 1.0   | 2.0   | 0.0   | 0.0  | 0.0   | 0.0  |
| 21UR-44250 | 19.5  | 2.0   | 14.0  | 10.0 | 0.0   | 4.0  |
| 21UR-44260 | 12.0  | 6.0   | 12.0  | 10.0 | 52.0  | 1.0  |
| 21UR-44270 | 0.0   | 1.0   | 0.0   | 0.0  | 0.0   | 0.0  |
| 21UR-44280 | 1.0   | 0.0   | 1.0   | 0.0  | 1.0   | 1.0  |
| 21UR-44290 | 23.0  | 35.0  | 8.0   | 10.0 | 26.0  | 3.0  |
| 21UR-4430  | 0.0   | 0.0   | 0.0   | 0.0  | 0.0   | 0.0  |
| 21UR-44300 | 0.0   | 1.0   | 0.0   | 0.0  | 1.0   | 0.0  |
| 21UR-44310 | 13.0  | 0.0   | 10.0  | 1.0  | 1.0   | 0.0  |
| 21UR-44320 | 0.0   | 0.0   | 0.0   | 0.0  | 0.0   | 0.0  |
| 21UR-44330 | 213.0 | 126.0 | 181.0 | 91.0 | 203.3 | 26.0 |
| 21UR-44340 | 0.0   | 0.0   | 0.0   | 0.0  | 0.0   | 0.0  |
| 21UR-44350 | 33.0  | 27.0  | 41.3  | 11.0 | 100.0 | 1.0  |
| 21UR-44370 | 94.0  | 44.0  | 74.0  | 52.0 | 31.0  | 6.0  |
| 21UR-44380 | 4.0   | 0.0   | 0.0   | 0.0  | 0.0   | 0.0  |
| 21UR-44390 | 0.0   | 7.0   | 1.0   | 0.0  | 6.3   | 0.0  |
| 21UR-4440  | 2.0   | 1.0   | 0.0   | 0.0  | 4.0   | 0.0  |
| 21UR-44400 | 7.0   | 12.0  | 4.0   | 5.0  | 7.0   | 2.0  |
| 21UR-44420 | 1.0   | 0.0   | 1.0   | 0.0  | 0.0   | 0.0  |
| 21UR-44430 | 0.0   | 0.0   | 0.0   | 0.0  | 0.0   | 0.0  |
| 21UR-44440 | 0.0   | 0.0   | 0.0   | 0.0  | 0.0   | 0.0  |
| 21UR-44450 | 0.0   | 0.0   | 0.0   | 0.0  | 0.0   | 0.0  |

|            |       |       |       |       |       |      |
|------------|-------|-------|-------|-------|-------|------|
| 21UR-44470 | 2.0   | 0.0   | 1.0   | 0.0   | 4.0   | 0.0  |
| 21UR-44480 | 1.0   | 0.0   | 0.0   | 0.0   | 0.0   | 0.0  |
| 21UR-44490 | 10.0  | 4.0   | 4.0   | 0.0   | 10.0  | 0.0  |
| 21UR-4450  | 4.0   | 0.0   | 1.0   | 1.0   | 0.0   | 0.0  |
| 21UR-44500 | 1.0   | 1.0   | 0.0   | 1.0   | 0.0   | 0.0  |
| 21UR-44510 | 0.0   | 0.0   | 0.0   | 0.0   | 0.0   | 0.0  |
| 21UR-44520 | 1.0   | 0.0   | 1.0   | 0.0   | 0.0   | 0.0  |
| 21UR-44530 | 0.0   | 0.0   | 0.0   | 0.0   | 0.0   | 1.0  |
| 21UR-44540 | 0.0   | 0.5   | 0.0   | 1.0   | 0.0   | 0.0  |
| 21UR-44550 | 0.0   | 0.0   | 0.0   | 0.0   | 0.0   | 0.0  |
| 21UR-44560 | 10.0  | 9.0   | 23.0  | 4.0   | 14.0  | 0.0  |
| 21UR-44570 | 2.0   | 1.0   | 1.0   | 1.0   | 3.0   | 0.0  |
| 21UR-44580 | 0.0   | 2.0   | 0.0   | 0.0   | 0.0   | 0.0  |
| 21UR-44590 | 698.0 | 247.2 | 820.0 | 499.0 | 350.5 | 22.0 |
| 21UR-4460  | 15.5  | 8.0   | 10.0  | 3.0   | 6.0   | 0.0  |
| 21UR-44600 | 0.0   | 0.0   | 0.0   | 0.0   | 0.0   | 0.0  |
| 21UR-44610 | 12.0  | 0.0   | 6.0   | 1.0   | 0.0   | 0.0  |
| 21UR-44620 | 1.0   | 2.0   | 0.0   | 0.0   | 2.0   | 0.0  |
| 21UR-44630 | 0.0   | 0.0   | 0.0   | 0.0   | 2.0   | 0.0  |
| 21UR-44640 | 0.0   | 11.0  | 0.0   | 0.0   | 1.0   | 0.0  |
| 21UR-44650 | 18.0  | 11.5  | 10.0  | 2.0   | 6.0   | 0.0  |
| 21UR-44660 | 43.0  | 4.0   | 32.0  | 11.0  | 12.3  | 0.0  |
| 21UR-44670 | 60.0  | 7.0   | 61.0  | 17.0  | 16.0  | 0.0  |
| 21UR-44680 | 1.0   | 0.0   | 0.0   | 0.0   | 1.0   | 0.0  |
| 21UR-44690 | 14.0  | 4.0   | 3.0   | 3.0   | 5.0   | 0.0  |
| 21UR-4470  | 0.0   | 4.0   | 6.0   | 0.0   | 8.0   | 1.0  |
| 21UR-44700 | 0.0   | 0.0   | 0.0   | 0.0   | 0.0   | 0.0  |
| 21UR-44730 | 0.0   | 0.0   | 0.0   | 0.0   | 0.0   | 0.0  |
| 21UR-44740 | 38.0  | 43.0  | 49.0  | 7.0   | 23.0  | 4.0  |
| 21UR-44750 | 18.0  | 9.0   | 29.0  | 9.0   | 3.0   | 1.0  |
| 21UR-44760 | 78.7  | 3.0   | 19.0  | 10.0  | 14.0  | 4.0  |
| 21UR-44770 | 1.0   | 1.0   | 0.0   | 0.0   | 0.0   | 0.0  |
| 21UR-44780 | 0.0   | 0.0   | 0.0   | 0.0   | 0.0   | 0.0  |
| 21UR-44790 | 0.0   | 0.0   | 0.0   | 0.0   | 0.0   | 0.0  |
| 21UR-4480  | 0.0   | 1.0   | 0.0   | 0.0   | 1.0   | 0.0  |
| 21UR-44800 | 0.0   | 0.0   | 1.0   | 0.0   | 0.0   | 0.0  |
| 21UR-44810 | 0.0   | 0.0   | 1.0   | 0.0   | 1.0   | 0.0  |
| 21UR-44820 | 0.0   | 0.0   | 0.0   | 0.0   | 0.0   | 0.0  |
| 21UR-44830 | 15.0  | 2.0   | 10.0  | 3.0   | 5.0   | 0.0  |
| 21UR-44840 | 4.0   | 37.0  | 6.0   | 2.0   | 0.0   | 0.0  |
| 21UR-44850 | 144.0 | 175.0 | 154.0 | 52.0  | 130.1 | 35.0 |
| 21UR-44860 | 0.0   | 0.0   | 0.0   | 0.0   | 0.0   | 0.0  |
| 21UR-44870 | 0.0   | 0.0   | 0.0   | 0.0   | 0.0   | 0.0  |
| 21UR-44890 | 8.0   | 3.0   | 1.0   | 0.0   | 2.0   | 1.0  |
| 21UR-4490  | 1.0   | 0.0   | 1.0   | 0.0   | 0.0   | 0.0  |
| 21UR-44900 | 0.0   | 0.0   | 0.0   | 0.0   | 0.0   | 0.0  |
| 21UR-44910 | 0.0   | 0.0   | 4.0   | 0.0   | 0.0   | 0.0  |
| 21UR-44920 | 0.0   | 0.0   | 0.0   | 0.0   | 0.0   | 0.0  |
| 21UR-44930 | 0.0   | 0.0   | 0.0   | 0.0   | 0.0   | 0.0  |
| 21UR-44940 | 2.0   | 0.0   | 0.0   | 0.0   | 1.0   | 0.0  |
| 21UR-44950 | 0.0   | 0.0   | 0.0   | 0.0   | 0.0   | 0.0  |

|            |        |       |        |        |       |      |
|------------|--------|-------|--------|--------|-------|------|
| 21UR-44960 | 26.0   | 1.0   | 22.0   | 10.0   | 0.0   | 0.0  |
| 21UR-44970 | 8.0    | 0.0   | 0.0    | 1.0    | 0.0   | 0.0  |
| 21UR-44980 | 0.0    | 0.0   | 0.0    | 0.0    | 0.0   | 0.0  |
| 21UR-44990 | 0.0    | 0.0   | 0.0    | 0.0    | 0.0   | 0.0  |
| 21UR-450   | 1.0    | 4.0   | 1.0    | 2.0    | 21.0  | 0.0  |
| 21UR-4500  | 1.0    | 0.0   | 0.0    | 0.0    | 0.0   | 0.0  |
| 21UR-45000 | 0.0    | 0.0   | 1.0    | 0.0    | 2.0   | 2.0  |
| 21UR-45010 | 0.0    | 0.0   | 0.0    | 0.0    | 0.0   | 0.0  |
| 21UR-45020 | 65.0   | 6.0   | 34.0   | 35.0   | 26.0  | 0.0  |
| 21UR-45030 | 0.0    | 1.0   | 1.0    | 1.0    | 6.0   | 0.0  |
| 21UR-45040 | 0.0    | 0.0   | 0.0    | 0.0    | 0.0   | 0.0  |
| 21UR-45050 | 0.0    | 0.0   | 0.0    | 0.0    | 0.0   | 0.0  |
| 21UR-45070 | 0.0    | 0.0   | 0.0    | 0.0    | 0.0   | 0.0  |
| 21UR-45080 | 0.0    | 0.0   | 0.0    | 0.0    | 0.0   | 0.0  |
| 21UR-45090 | 1256.0 | 94.0  | 1227.0 | 563.0  | 132.7 | 33.0 |
| 21UR-4510  | 0.0    | 0.0   | 0.0    | 0.0    | 0.0   | 0.0  |
| 21UR-45100 | 3757.0 | 472.0 | 2765.0 | 1697.0 | 650.0 | 60.0 |
| 21UR-45110 | 13.0   | 10.0  | 12.0   | 2.0    | 5.0   | 1.0  |
| 21UR-45120 | 0.0    | 0.0   | 0.0    | 0.0    | 1.0   | 0.0  |
| 21UR-45130 | 1.0    | 1.0   | 4.0    | 0.0    | 5.0   | 0.0  |
| 21UR-45140 | 4.0    | 4.0   | 13.0   | 0.0    | 12.0  | 0.0  |
| 21UR-45150 | 1.0    | 4.0   | 0.0    | 0.0    | 7.0   | 0.0  |
| 21UR-45160 | 6.0    | 0.0   | 1.0    | 0.0    | 0.0   | 0.0  |
| 21UR-45170 | 1.0    | 4.0   | 3.0    | 0.0    | 22.0  | 1.0  |
| 21UR-45180 | 0.0    | 0.1   | 0.0    | 0.0    | 0.0   | 0.0  |
| 21UR-45190 | 19.0   | 0.0   | 4.0    | 1.0    | 0.0   | 0.0  |
| 21UR-4520  | 0.0    | 0.0   | 0.0    | 0.0    | 0.0   | 0.0  |
| 21UR-45200 | 0.0    | 0.0   | 0.0    | 0.0    | 1.0   | 0.0  |
| 21UR-45210 | 0.0    | 0.0   | 0.0    | 0.0    | 0.0   | 0.0  |
| 21UR-45220 | 0.0    | 0.0   | 0.0    | 0.0    | 0.0   | 0.0  |
| 21UR-45230 | 0.0    | 6.0   | 6.0    | 0.0    | 6.0   | 0.0  |
| 21UR-45240 | 0.0    | 0.0   | 0.0    | 0.0    | 0.0   | 0.0  |
| 21UR-45250 | 0.0    | 0.0   | 0.0    | 0.0    | 0.0   | 0.0  |
| 21UR-45260 | 0.0    | 1.0   | 0.0    | 0.0    | 0.0   | 0.0  |
| 21UR-45270 | 14.0   | 0.0   | 15.0   | 10.0   | 1.0   | 0.0  |
| 21UR-45280 | 0.0    | 0.0   | 0.0    | 1.0    | 1.0   | 0.0  |
| 21UR-4530  | 1571.0 | 277.8 | 1855.8 | 451.0  | 215.0 | 34.0 |
| 21UR-45300 | 0.0    | 0.0   | 0.0    | 0.0    | 0.0   | 0.0  |
| 21UR-45310 | 0.0    | 0.0   | 4.0    | 4.0    | 1.0   | 0.0  |
| 21UR-45320 | 16.0   | 10.1  | 12.0   | 3.0    | 4.0   | 0.0  |
| 21UR-45330 | 332.0  | 143.0 | 288.0  | 83.0   | 151.0 | 6.0  |
| 21UR-45340 | 0.0    | 0.0   | 0.0    | 0.0    | 1.0   | 0.0  |
| 21UR-45350 | 2.0    | 2.0   | 3.0    | 0.0    | 1.0   | 2.0  |
| 21UR-45360 | 1.0    | 0.0   | 1.0    | 4.0    | 0.0   | 0.0  |
| 21UR-45370 | 176.0  | 38.0  | 128.0  | 88.0   | 121.7 | 6.0  |
| 21UR-45380 | 0.0    | 0.0   | 0.0    | 0.0    | 0.0   | 0.1  |
| 21UR-45390 | 6.0    | 4.0   | 1.0    | 0.0    | 1.0   | 0.0  |
| 21UR-4540  | 0.0    | 0.0   | 0.0    | 0.0    | 1.0   | 0.0  |
| 21UR-45400 | 0.0    | 4.0   | 0.0    | 0.0    | 0.0   | 0.0  |
| 21UR-45410 | 0.0    | 0.0   | 0.0    | 0.0    | 0.0   | 0.0  |
| 21UR-45420 | 0.0    | 0.0   | 0.0    | 0.0    | 0.0   | 0.0  |

|            |       |       |       |       |       |      |
|------------|-------|-------|-------|-------|-------|------|
| 21UR-45430 | 14.0  | 1.0   | 14.0  | 4.0   | 1.0   | 0.0  |
| 21UR-45440 | 0.0   | 4.0   | 1.0   | 0.0   | 0.0   | 0.0  |
| 21UR-45450 | 20.0  | 0.0   | 22.0  | 10.0  | 7.0   | 0.0  |
| 21UR-45460 | 0.0   | 0.0   | 0.0   | 0.0   | 0.0   | 0.0  |
| 21UR-45470 | 0.0   | 0.0   | 0.0   | 0.0   | 0.0   | 0.0  |
| 21UR-45480 | 2.0   | 0.0   | 0.0   | 0.0   | 0.0   | 0.0  |
| 21UR-45490 | 0.0   | 0.0   | 0.0   | 0.0   | 0.0   | 0.0  |
| 21UR-4550  | 4.0   | 7.0   | 0.0   | 4.0   | 8.0   | 0.0  |
| 21UR-45500 | 0.0   | 0.0   | 0.0   | 0.0   | 0.0   | 0.0  |
| 21UR-45510 | 1.0   | 2.0   | 5.0   | 5.0   | 2.0   | 1.0  |
| 21UR-45520 | 0.0   | 0.0   | 0.0   | 0.0   | 0.0   | 0.0  |
| 21UR-45530 | 0.0   | 0.0   | 0.0   | 0.0   | 0.0   | 0.0  |
| 21UR-45540 | 1.0   | 4.0   | 1.0   | 0.0   | 4.0   | 0.0  |
| 21UR-45550 | 8.0   | 1.0   | 1.0   | 6.0   | 5.5   | 0.0  |
| 21UR-45560 | 38.5  | 35.1  | 34.0  | 13.7  | 69.0  | 2.0  |
| 21UR-45570 | 215.7 | 44.0  | 220.0 | 192.0 | 93.0  | 10.0 |
| 21UR-45580 | 0.0   | 0.0   | 8.0   | 0.0   | 1.0   | 0.0  |
| 21UR-45590 | 16.0  | 1.0   | 22.0  | 7.0   | 2.0   | 0.0  |
| 21UR-4560  | 0.0   | 0.0   | 0.0   | 0.0   | 0.0   | 0.0  |
| 21UR-45600 | 393.0 | 26.0  | 307.0 | 243.3 | 52.0  | 0.0  |
| 21UR-45620 | 0.0   | 3.0   | 6.0   | 0.0   | 0.0   | 0.0  |
| 21UR-45630 | 0.0   | 0.0   | 0.0   | 0.0   | 0.0   | 0.0  |
| 21UR-45640 | 1.0   | 2.0   | 0.0   | 0.0   | 1.0   | 1.0  |
| 21UR-45650 | 8.5   | 11.0  | 6.0   | 4.0   | 35.0  | 0.0  |
| 21UR-45660 | 6.0   | 0.0   | 1.0   | 1.0   | 0.0   | 0.0  |
| 21UR-45670 | 28.7  | 5.0   | 27.0  | 4.0   | 14.7  | 1.0  |
| 21UR-45680 | 11.0  | 8.0   | 11.0  | 0.0   | 9.0   | 0.0  |
| 21UR-45690 | 1.0   | 0.0   | 4.0   | 0.0   | 1.0   | 1.0  |
| 21UR-4570  | 1.0   | 7.0   | 0.0   | 0.0   | 0.0   | 2.0  |
| 21UR-45700 | 1.0   | 15.0  | 6.0   | 0.0   | 29.0  | 1.0  |
| 21UR-45710 | 20.0  | 0.0   | 8.0   | 8.0   | 4.0   | 0.0  |
| 21UR-45720 | 873.7 | 151.0 | 934.7 | 425.0 | 295.0 | 12.0 |
| 21UR-45730 | 14.0  | 48.0  | 6.0   | 12.0  | 40.0  | 6.0  |
| 21UR-45740 | 0.0   | 0.0   | 0.0   | 0.0   | 0.0   | 0.0  |
| 21UR-45750 | 0.0   | 0.0   | 0.0   | 0.0   | 0.0   | 0.0  |
| 21UR-45760 | 4.0   | 3.0   | 1.0   | 1.0   | 0.0   | 0.0  |
| 21UR-45770 | 0.0   | 0.0   | 1.0   | 0.0   | 0.0   | 0.0  |
| 21UR-45780 | 4.0   | 3.0   | 4.0   | 3.0   | 4.0   | 0.0  |
| 21UR-45790 | 1.0   | 0.0   | 0.0   | 0.0   | 0.0   | 0.0  |
| 21UR-4580  | 0.0   | 0.0   | 1.0   | 0.0   | 0.0   | 0.0  |
| 21UR-45800 | 1.0   | 0.0   | 1.0   | 0.0   | 0.0   | 0.0  |
| 21UR-45810 | 0.0   | 0.0   | 1.0   | 0.0   | 0.0   | 0.0  |
| 21UR-45820 | 1.0   | 1.0   | 0.0   | 0.0   | 0.0   | 0.0  |
| 21UR-45830 | 1.0   | 0.0   | 0.0   | 0.0   | 1.0   | 0.0  |
| 21UR-45840 | 1.0   | 0.0   | 4.0   | 1.0   | 4.0   | 0.0  |
| 21UR-45850 | 31.0  | 3.0   | 42.0  | 7.0   | 13.0  | 0.0  |
| 21UR-45860 | 1.0   | 0.0   | 0.0   | 0.0   | 1.0   | 0.0  |
| 21UR-45870 | 2.0   | 0.0   | 0.0   | 0.0   | 1.0   | 0.0  |
| 21UR-45880 | 0.0   | 0.0   | 1.0   | 0.0   | 1.0   | 0.0  |
| 21UR-45890 | 62.0  | 79.0  | 23.0  | 4.0   | 127.0 | 6.0  |
| 21UR-45910 | 8.0   | 24.0  | 16.0  | 1.0   | 9.0   | 1.0  |

|            |       |      |       |       |      |      |
|------------|-------|------|-------|-------|------|------|
| 21UR-45920 | 1.0   | 0.0  | 4.0   | 0.0   | 0.0  | 1.0  |
| 21UR-45930 | 0.0   | 0.0  | 0.0   | 0.0   | 0.0  | 0.0  |
| 21UR-45940 | 0.0   | 0.0  | 0.0   | 0.0   | 0.0  | 0.0  |
| 21UR-45950 | 0.0   | 1.0  | 0.0   | 0.0   | 0.0  | 0.0  |
| 21UR-45960 | 1.0   | 6.0  | 1.0   | 0.0   | 6.0  | 0.0  |
| 21UR-45970 | 0.0   | 0.0  | 0.0   | 0.0   | 0.0  | 0.0  |
| 21UR-45980 | 0.0   | 0.0  | 0.0   | 0.0   | 4.0  | 0.0  |
| 21UR-45990 | 0.0   | 0.0  | 0.0   | 1.0   | 0.0  | 0.0  |
| 21UR-460   | 0.0   | 0.0  | 0.0   | 0.0   | 6.0  | 0.0  |
| 21UR-4600  | 0.0   | 0.0  | 0.0   | 0.0   | 0.0  | 0.0  |
| 21UR-46000 | 25.0  | 19.0 | 20.7  | 24.0  | 12.0 | 2.0  |
| 21UR-46010 | 1.0   | 0.0  | 0.0   | 1.0   | 1.0  | 0.0  |
| 21UR-46020 | 6.0   | 0.0  | 0.0   | 0.0   | 8.0  | 0.0  |
| 21UR-46030 | 0.0   | 1.0  | 0.0   | 0.0   | 1.0  | 0.0  |
| 21UR-46040 | 0.0   | 4.0  | 0.0   | 0.0   | 0.0  | 1.0  |
| 21UR-46050 | 311.0 | 26.0 | 200.7 | 73.0  | 69.7 | 6.0  |
| 21UR-46060 | 0.0   | 9.0  | 4.0   | 0.0   | 6.0  | 0.0  |
| 21UR-46070 | 0.0   | 0.0  | 0.0   | 0.0   | 0.0  | 0.0  |
| 21UR-46080 | 0.0   | 0.0  | 0.0   | 0.0   | 0.0  | 0.0  |
| 21UR-46090 | 1.0   | 10.0 | 0.0   | 0.0   | 6.0  | 0.0  |
| 21UR-4610  | 1.0   | 2.0  | 0.0   | 0.0   | 1.0  | 1.0  |
| 21UR-46100 | 0.0   | 0.0  | 0.0   | 0.0   | 0.0  | 0.0  |
| 21UR-46110 | 15.7  | 14.0 | 21.0  | 1.0   | 3.0  | 0.0  |
| 21UR-46120 | 0.0   | 1.0  | 0.0   | 0.0   | 0.0  | 0.0  |
| 21UR-46130 | 0.0   | 0.0  | 0.0   | 0.0   | 1.1  | 0.0  |
| 21UR-46140 | 32.0  | 9.0  | 27.0  | 14.0  | 0.0  | 0.0  |
| 21UR-46150 | 23.0  | 0.0  | 21.0  | 0.0   | 4.0  | 0.0  |
| 21UR-46160 | 4.0   | 0.0  | 1.0   | 0.0   | 3.0  | 0.0  |
| 21UR-46170 | 1.0   | 0.0  | 0.0   | 0.0   | 0.0  | 0.0  |
| 21UR-46180 | 6.0   | 0.0  | 1.0   | 0.0   | 2.0  | 0.0  |
| 21UR-46190 | 7.0   | 0.0  | 12.0  | 1.0   | 1.0  | 0.0  |
| 21UR-4620  | 12.0  | 0.0  | 9.0   | 4.0   | 10.0 | 0.0  |
| 21UR-46200 | 0.0   | 0.0  | 0.0   | 0.0   | 0.0  | 0.0  |
| 21UR-46210 | 742.5 | 23.0 | 461.0 | 136.0 | 3.0  | 12.7 |
| 21UR-46220 | 1.0   | 0.0  | 1.0   | 0.0   | 0.0  | 0.0  |
| 21UR-46240 | 10.0  | 3.0  | 14.0  | 0.0   | 9.0  | 0.0  |
| 21UR-46250 | 104.0 | 44.0 | 44.0  | 42.0  | 96.0 | 20.0 |
| 21UR-46260 | 3.0   | 0.0  | 3.0   | 0.0   | 1.0  | 0.0  |
| 21UR-46270 | 4.0   | 0.0  | 14.0  | 1.0   | 0.0  | 0.0  |
| 21UR-46280 | 2.0   | 0.0  | 1.0   | 1.0   | 1.0  | 0.0  |
| 21UR-46290 | 0.0   | 0.0  | 0.0   | 0.0   | 0.0  | 0.0  |
| 21UR-4630  | 6.0   | 1.0  | 4.0   | 1.0   | 4.0  | 0.0  |
| 21UR-46300 | 6.0   | 2.0  | 13.0  | 1.0   | 0.0  | 1.0  |
| 21UR-46310 | 0.0   | 0.0  | 0.0   | 0.0   | 1.0  | 0.0  |
| 21UR-46320 | 41.0  | 11.0 | 46.0  | 11.0  | 11.0 | 0.0  |
| 21UR-46330 | 0.0   | 0.0  | 4.0   | 1.0   | 0.0  | 0.0  |
| 21UR-46340 | 0.0   | 0.0  | 0.0   | 0.0   | 0.0  | 0.0  |
| 21UR-46350 | 0.0   | 3.0  | 0.0   | 1.0   | 1.0  | 0.0  |
| 21UR-46360 | 0.0   | 4.0  | 0.0   | 0.0   | 2.0  | 0.0  |
| 21UR-46370 | 0.0   | 1.0  | 0.0   | 0.0   | 0.0  | 0.0  |
| 21UR-46380 | 105.0 | 8.0  | 113.0 | 42.0  | 18.0 | 0.0  |

|            |        |       |        |        |       |      |
|------------|--------|-------|--------|--------|-------|------|
| 21UR-46390 | 0.0    | 2.0   | 0.0    | 0.0    | 6.0   | 1.0  |
| 21UR-4640  | 0.0    | 0.0   | 0.0    | 0.0    | 0.0   | 0.0  |
| 21UR-46400 | 12.0   | 4.0   | 6.0    | 1.0    | 46.1  | 1.0  |
| 21UR-46410 | 1.0    | 2.0   | 1.0    | 0.0    | 6.0   | 0.0  |
| 21UR-46420 | 1.0    | 0.5   | 0.0    | 0.0    | 0.0   | 0.0  |
| 21UR-46430 | 0.0    | 0.0   | 0.0    | 0.0    | 0.0   | 0.0  |
| 21UR-46440 | 4.0    | 8.0   | 1.0    | 0.0    | 13.0  | 1.0  |
| 21UR-46450 | 21.5   | 3.0   | 8.0    | 4.0    | 3.0   | 4.0  |
| 21UR-46460 | 6.0    | 0.0   | 4.0    | 1.0    | 1.0   | 0.0  |
| 21UR-46470 | 93.0   | 1.0   | 68.0   | 11.0   | 1.0   | 1.0  |
| 21UR-46480 | 2.0    | 0.0   | 4.0    | 0.0    | 0.0   | 0.0  |
| 21UR-46490 | 34.3   | 4.0   | 27.0   | 6.0    | 13.0  | 0.0  |
| 21UR-4650  | 11.2   | 4.0   | 20.0   | 10.0   | 4.0   | 0.0  |
| 21UR-46500 | 0.0    | 0.0   | 1.0    | 0.0    | 4.0   | 0.0  |
| 21UR-46510 | 0.0    | 0.0   | 0.0    | 0.0    | 0.0   | 0.0  |
| 21UR-46520 | 0.0    | 0.0   | 0.0    | 0.0    | 0.0   | 0.0  |
| 21UR-46540 | 0.0    | 1.0   | 0.0    | 1.0    | 0.0   | 0.0  |
| 21UR-46550 | 123.0  | 143.0 | 130.0  | 51.0   | 127.0 | 16.0 |
| 21UR-46560 | 0.0    | 2.0   | 0.0    | 1.0    | 10.0  | 0.0  |
| 21UR-46570 | 0.0    | 11.0  | 0.0    | 0.0    | 1.0   | 0.0  |
| 21UR-46580 | 24.0   | 5.1   | 27.0   | 13.0   | 30.0  | 0.0  |
| 21UR-46590 | 2828.0 | 378.5 | 2307.5 | 1473.0 | 652.5 | 67.0 |
| 21UR-4660  | 1.0    | 5.0   | 14.0   | 0.0    | 10.0  | 0.0  |
| 21UR-46600 | 0.0    | 0.0   | 0.0    | 0.0    | 0.0   | 0.0  |
| 21UR-46610 | 0.0    | 0.0   | 0.0    | 0.0    | 4.0   | 0.0  |
| 21UR-46620 | 0.0    | 0.0   | 1.0    | 1.0    | 0.0   | 1.0  |
| 21UR-46640 | 0.0    | 0.0   | 0.0    | 0.0    | 0.0   | 0.0  |
| 21UR-46650 | 0.0    | 0.0   | 0.0    | 0.0    | 0.0   | 0.0  |
| 21UR-46660 | 0.0    | 0.0   | 1.0    | 0.0    | 0.0   | 1.0  |
| 21UR-46670 | 44.0   | 25.0  | 41.0   | 17.0   | 41.0  | 4.0  |
| 21UR-46680 | 114.0  | 12.0  | 96.0   | 45.0   | 24.0  | 1.0  |
| 21UR-46690 | 1.0    | 0.0   | 0.0    | 0.0    | 0.0   | 0.0  |
| 21UR-4670  | 10.0   | 25.0  | 5.0    | 5.0    | 63.0  | 7.0  |
| 21UR-46700 | 10.0   | 0.0   | 6.0    | 10.0   | 4.0   | 0.0  |
| 21UR-46710 | 4.0    | 3.0   | 12.0   | 0.0    | 1.0   | 0.0  |
| 21UR-46720 | 2.0    | 4.0   | 6.0    | 5.0    | 11.0  | 1.0  |
| 21UR-46730 | 0.0    | 0.0   | 0.0    | 0.0    | 0.0   | 0.0  |
| 21UR-46740 | 0.0    | 0.0   | 0.0    | 0.0    | 0.0   | 0.0  |
| 21UR-46750 | 1.0    | 0.0   | 0.0    | 0.0    | 0.0   | 0.0  |
| 21UR-46760 | 0.0    | 0.0   | 0.0    | 0.0    | 0.0   | 0.0  |
| 21UR-46770 | 0.0    | 0.0   | 0.0    | 0.0    | 1.0   | 0.0  |
| 21UR-46780 | 18.0   | 4.0   | 11.0   | 4.0    | 4.0   | 2.0  |
| 21UR-46790 | 0.0    | 1.0   | 1.0    | 0.0    | 4.0   | 0.0  |
| 21UR-4680  | 5.0    | 2.0   | 6.0    | 0.0    | 6.0   | 0.0  |
| 21UR-46800 | 0.0    | 0.0   | 2.0    | 0.0    | 0.0   | 0.0  |
| 21UR-46810 | 0.0    | 0.0   | 0.0    | 0.0    | 0.0   | 0.0  |
| 21UR-46820 | 45.0   | 8.0   | 34.0   | 16.0   | 6.0   | 1.0  |
| 21UR-46830 | 2.0    | 4.0   | 6.0    | 1.0    | 0.0   | 0.0  |
| 21UR-46840 | 0.0    | 0.0   | 0.0    | 0.0    | 0.0   | 0.0  |
| 21UR-46850 | 0.0    | 1.0   | 1.0    | 0.0    | 0.0   | 0.0  |
| 21UR-46870 | 0.0    | 5.0   | 1.0    | 0.0    | 4.0   | 0.0  |



|            |       |      |       |       |       |      |
|------------|-------|------|-------|-------|-------|------|
| 21UR-46880 | 1.0   | 0.0  | 2.0   | 1.0   | 0.0   | 0.0  |
| 21UR-46890 | 4.0   | 2.0  | 0.0   | 0.0   | 1.0   | 0.0  |
| 21UR-4690  | 1.0   | 7.0  | 6.0   | 0.0   | 2.0   | 0.0  |
| 21UR-46900 | 19.0  | 17.0 | 15.0  | 8.0   | 31.0  | 0.0  |
| 21UR-46910 | 0.0   | 8.0  | 3.0   | 0.0   | 4.0   | 1.0  |
| 21UR-46920 | 3.0   | 1.0  | 6.0   | 0.0   | 0.0   | 0.0  |
| 21UR-46930 | 342.0 | 8.0  | 395.5 | 79.0  | 7.0   | 2.0  |
| 21UR-46940 | 1.0   | 0.0  | 0.0   | 0.0   | 0.0   | 0.0  |
| 21UR-46950 | 8.0   | 0.0  | 4.0   | 0.0   | 1.0   | 0.0  |
| 21UR-46960 | 1.0   | 1.0  | 3.0   | 0.0   | 3.0   | 0.0  |
| 21UR-46970 | 0.0   | 1.0  | 0.0   | 1.0   | 0.0   | 0.0  |
| 21UR-46980 | 9.0   | 40.0 | 14.5  | 11.0  | 12.0  | 11.5 |
| 21UR-470   | 38.0  | 27.1 | 29.0  | 14.0  | 23.0  | 1.0  |
| 21UR-4700  | 0.0   | 0.0  | 1.0   | 0.0   | 2.0   | 1.0  |
| 21UR-47000 | 6.0   | 1.0  | 4.0   | 0.0   | 0.0   | 0.0  |
| 21UR-47010 | 1.0   | 0.0  | 2.0   | 0.0   | 1.0   | 0.0  |
| 21UR-47020 | 0.0   | 1.0  | 0.0   | 0.0   | 1.0   | 0.0  |
| 21UR-47030 | 81.0  | 28.0 | 88.0  | 31.0  | 30.0  | 1.0  |
| 21UR-47040 | 0.0   | 0.0  | 0.0   | 0.0   | 0.0   | 0.0  |
| 21UR-47050 | 0.0   | 0.0  | 0.0   | 0.0   | 0.0   | 1.0  |
| 21UR-47060 | 9.0   | 1.0  | 6.0   | 4.0   | 0.0   | 0.0  |
| 21UR-47070 | 4.0   | 1.0  | 0.0   | 1.0   | 4.0   | 0.0  |
| 21UR-47080 | 0.0   | 0.0  | 0.0   | 0.0   | 4.0   | 0.0  |
| 21UR-47090 | 30.0  | 3.0  | 24.0  | 7.0   | 10.0  | 3.0  |
| 21UR-4710  | 0.0   | 0.0  | 0.0   | 0.0   | 0.0   | 0.0  |
| 21UR-47100 | 0.0   | 0.0  | 0.0   | 0.0   | 0.0   | 0.0  |
| 21UR-47110 | 265.0 | 10.0 | 233.0 | 44.0  | 3.0   | 2.0  |
| 21UR-47120 | 4.0   | 5.0  | 0.0   | 0.0   | 1.0   | 0.0  |
| 21UR-47130 | 0.0   | 0.0  | 1.0   | 0.0   | 0.0   | 0.0  |
| 21UR-47140 | 0.0   | 0.0  | 1.0   | 0.0   | 0.0   | 0.0  |
| 21UR-47150 | 0.0   | 2.0  | 4.0   | 0.0   | 7.0   | 0.0  |
| 21UR-47160 | 0.0   | 0.0  | 0.0   | 0.0   | 0.0   | 0.0  |
| 21UR-47170 | 0.0   | 0.0  | 0.0   | 0.0   | 0.5   | 0.0  |
| 21UR-47180 | 43.5  | 1.0  | 24.0  | 10.0  | 1.0   | 0.0  |
| 21UR-47190 | 0.0   | 0.0  | 0.0   | 0.0   | 0.0   | 0.0  |
| 21UR-4720  | 14.0  | 18.0 | 10.0  | 8.0   | 24.0  | 1.0  |
| 21UR-47200 | 0.0   | 0.0  | 0.0   | 0.0   | 0.0   | 0.0  |
| 21UR-47210 | 7.0   | 2.0  | 18.0  | 2.0   | 4.0   | 1.0  |
| 21UR-47220 | 0.0   | 0.0  | 0.0   | 0.0   | 0.0   | 1.0  |
| 21UR-47230 | 26.0  | 16.0 | 20.0  | 9.0   | 12.0  | 4.0  |
| 21UR-47240 | 1.0   | 2.2  | 8.0   | 1.0   | 0.0   | 0.0  |
| 21UR-47250 | 0.0   | 0.0  | 0.0   | 0.0   | 0.0   | 1.0  |
| 21UR-47260 | 0.0   | 0.0  | 0.0   | 0.0   | 0.0   | 0.0  |
| 21UR-47270 | 1.0   | 1.0  | 4.0   | 0.0   | 1.0   | 1.0  |
| 21UR-47280 | 17.0  | 7.0  | 18.8  | 9.0   | 7.0   | 1.0  |
| 21UR-47290 | 1.0   | 4.0  | 1.0   | 0.0   | 7.0   | 3.0  |
| 21UR-4730  | 0.0   | 0.0  | 0.0   | 0.0   | 0.0   | 0.0  |
| 21UR-47300 | 751.0 | 66.0 | 694.0 | 293.0 | 114.0 | 9.0  |
| 21UR-47310 | 1.0   | 0.0  | 4.0   | 0.0   | 3.0   | 0.0  |
| 21UR-47320 | 3.0   | 6.0  | 4.0   | 1.0   | 8.0   | 0.0  |
| 21UR-47330 | 1.0   | 1.0  | 0.0   | 0.0   | 0.0   | 0.0  |

|            |        |        |        |        |       |       |
|------------|--------|--------|--------|--------|-------|-------|
| 21UR-47340 | 8.0    | 0.0    | 10.0   | 4.0    | 1.0   | 0.0   |
| 21UR-47350 | 6.0    | 7.0    | 4.0    | 1.0    | 6.0   | 0.0   |
| 21UR-47360 | 6.0    | 0.0    | 4.0    | 0.0    | 4.0   | 0.0   |
| 21UR-47370 | 32.0   | 30.0   | 56.0   | 21.0   | 37.0  | 1.0   |
| 21UR-47380 | 0.0    | 0.0    | 0.0    | 0.0    | 0.0   | 0.0   |
| 21UR-47390 | 0.0    | 2.0    | 0.0    | 0.0    | 6.0   | 0.0   |
| 21UR-4740  | 0.0    | 0.0    | 0.0    | 0.0    | 0.0   | 0.0   |
| 21UR-47400 | 0.0    | 0.0    | 0.0    | 0.0    | 0.0   | 0.0   |
| 21UR-47410 | 0.0    | 0.0    | 0.0    | 0.0    | 0.0   | 0.0   |
| 21UR-47420 | 0.0    | 1.0    | 0.0    | 0.0    | 0.0   | 0.0   |
| 21UR-47430 | 4.0    | 0.0    | 1.0    | 4.0    | 1.0   | 1.0   |
| 21UR-47440 | 335.0  | 209.0  | 379.0  | 223.0  | 201.0 | 40.0  |
| 21UR-47450 | 0.0    | 1.0    | 0.0    | 0.0    | 0.0   | 0.0   |
| 21UR-47460 | 0.0    | 0.0    | 0.0    | 0.0    | 0.0   | 0.0   |
| 21UR-47470 | 25.0   | 16.0   | 33.0   | 12.0   | 16.0  | 0.0   |
| 21UR-47480 | 7005.0 | 2222.5 | 6152.0 | 2616.0 | 657.0 | 249.0 |
| 21UR-47490 | 1.0    | 0.0    | 1.0    | 1.0    | 0.0   | 0.0   |
| 21UR-4750  | 0.0    | 0.0    | 0.0    | 0.0    | 0.0   | 0.0   |
| 21UR-47500 | 4.0    | 5.0    | 0.0    | 4.0    | 4.0   | 0.0   |
| 21UR-47510 | 0.0    | 0.0    | 1.0    | 0.0    | 0.0   | 0.0   |
| 21UR-47520 | 71.0   | 17.1   | 70.0   | 26.0   | 25.0  | 5.0   |
| 21UR-47530 | 1.0    | 0.5    | 0.0    | 6.0    | 0.0   | 0.0   |
| 21UR-47540 | 0.0    | 0.0    | 0.0    | 0.0    | 0.0   | 0.0   |
| 21UR-47550 | 163.0  | 21.0   | 147.0  | 104.0  | 102.0 | 1.0   |
| 21UR-47560 | 0.0    | 1.0    | 0.0    | 0.0    | 0.0   | 0.0   |
| 21UR-47570 | 1.0    | 0.0    | 0.0    | 0.0    | 0.0   | 0.0   |
| 21UR-47580 | 10.0   | 0.0    | 13.0   | 1.0    | 4.0   | 1.0   |
| 21UR-47590 | 0.0    | 0.7    | 0.0    | 0.0    | 0.0   | 0.6   |
| 21UR-47600 | 0.0    | 0.0    | 0.0    | 0.0    | 0.0   | 0.0   |
| 21UR-47610 | 0.0    | 0.0    | 0.0    | 0.0    | 0.0   | 0.0   |
| 21UR-47620 | 0.0    | 0.0    | 2.0    | 0.0    | 1.0   | 0.0   |
| 21UR-47630 | 6.0    | 13.0   | 7.0    | 2.0    | 23.0  | 2.0   |
| 21UR-47640 | 1.0    | 0.0    | 0.0    | 0.0    | 1.5   | 0.0   |
| 21UR-47650 | 74.0   | 26.0   | 83.0   | 55.0   | 50.0  | 1.0   |
| 21UR-47660 | 0.0    | 0.0    | 0.0    | 1.0    | 0.0   | 0.0   |
| 21UR-47670 | 0.0    | 0.0    | 0.0    | 0.0    | 0.0   | 0.0   |
| 21UR-47680 | 0.0    | 0.0    | 0.0    | 0.0    | 0.0   | 0.0   |
| 21UR-47690 | 18.0   | 76.0   | 25.0   | 8.0    | 45.0  | 4.0   |
| 21UR-4770  | 40.0   | 47.0   | 38.0   | 9.0    | 13.0  | 10.0  |
| 21UR-47700 | 0.0    | 0.0    | 0.0    | 1.0    | 0.0   | 0.0   |
| 21UR-47710 | 0.0    | 0.0    | 0.0    | 0.0    | 0.0   | 0.0   |
| 21UR-47720 | 4.0    | 1.0    | 2.0    | 0.0    | 4.0   | 0.0   |
| 21UR-47730 | 184.0  | 24.0   | 172.0  | 38.0   | 11.0  | 7.0   |
| 21UR-47740 | 2.0    | 0.0    | 6.0    | 1.0    | 4.1   | 0.0   |
| 21UR-47750 | 0.0    | 0.0    | 0.0    | 0.0    | 0.0   | 0.0   |
| 21UR-47760 | 5.0    | 6.0    | 7.0    | 4.0    | 4.0   | 0.0   |
| 21UR-47770 | 0.0    | 1.0    | 0.0    | 0.0    | 0.0   | 0.0   |
| 21UR-47780 | 18.0   | 6.0    | 25.0   | 6.0    | 8.0   | 1.0   |
| 21UR-47790 | 0.0    | 0.0    | 0.0    | 0.0    | 0.0   | 0.0   |
| 21UR-4780  | 0.0    | 0.0    | 0.0    | 0.0    | 0.0   | 0.0   |
| 21UR-47800 | 4.0    | 28.0   | 1.0    | 0.0    | 33.0  | 8.0   |

|            |       |      |       |       |       |      |
|------------|-------|------|-------|-------|-------|------|
| 21UR-47810 | 0.0   | 1.0  | 1.0   | 0.0   | 4.0   | 0.0  |
| 21UR-47820 | 303.0 | 75.0 | 429.0 | 144.0 | 132.0 | 5.0  |
| 21UR-47830 | 13.0  | 6.0  | 7.0   | 9.0   | 9.0   | 0.0  |
| 21UR-47840 | 4.0   | 5.0  | 4.0   | 0.0   | 6.0   | 0.0  |
| 21UR-47850 | 0.0   | 0.0  | 0.0   | 0.0   | 0.0   | 0.0  |
| 21UR-47860 | 0.0   | 4.0  | 0.0   | 0.0   | 0.0   | 0.0  |
| 21UR-47870 | 0.0   | 0.0  | 4.0   | 0.0   | 1.0   | 0.0  |
| 21UR-47880 | 0.0   | 2.0  | 1.0   | 0.0   | 1.0   | 0.0  |
| 21UR-47890 | 0.0   | 4.0  | 0.0   | 1.0   | 6.0   | 4.0  |
| 21UR-4790  | 0.0   | 0.0  | 0.0   | 0.0   | 0.0   | 0.0  |
| 21UR-47900 | 0.0   | 11.0 | 0.0   | 0.0   | 9.0   | 4.0  |
| 21UR-47910 | 0.0   | 0.0  | 0.0   | 0.0   | 0.0   | 0.0  |
| 21UR-47920 | 1.0   | 8.0  | 1.0   | 0.0   | 10.0  | 1.0  |
| 21UR-47930 | 13.0  | 3.0  | 9.0   | 7.0   | 6.0   | 1.0  |
| 21UR-47940 | 0.0   | 0.0  | 0.0   | 0.0   | 1.0   | 0.0  |
| 21UR-47950 | 6.0   | 0.0  | 6.0   | 0.0   | 0.0   | 0.0  |
| 21UR-47960 | 1.0   | 1.0  | 6.0   | 0.0   | 0.0   | 0.0  |
| 21UR-47970 | 215.0 | 21.0 | 115.0 | 60.0  | 44.0  | 4.0  |
| 21UR-47980 | 0.0   | 4.0  | 0.0   | 0.0   | 0.0   | 0.0  |
| 21UR-47990 | 0.0   | 1.5  | 0.0   | 0.0   | 2.0   | 0.0  |
| 21UR-480   | 0.0   | 0.0  | 0.0   | 0.0   | 1.0   | 0.0  |
| 21UR-4800  | 120.0 | 3.0  | 82.0  | 21.0  | 0.0   | 0.0  |
| 21UR-48000 | 0.0   | 0.0  | 0.0   | 0.0   | 0.0   | 0.0  |
| 21UR-48010 | 0.0   | 0.0  | 0.0   | 0.0   | 0.0   | 0.0  |
| 21UR-48020 | 1.0   | 3.0  | 1.0   | 0.0   | 1.0   | 0.0  |
| 21UR-48030 | 8.0   | 1.0  | 4.0   | 8.0   | 0.0   | 0.0  |
| 21UR-48040 | 18.0  | 0.0  | 7.0   | 3.0   | 3.0   | 0.0  |
| 21UR-48050 | 1.0   | 1.0  | 1.0   | 1.0   | 1.0   | 0.0  |
| 21UR-48060 | 0.0   | 0.0  | 0.0   | 0.0   | 0.9   | 0.0  |
| 21UR-48070 | 315.0 | 9.0  | 198.0 | 52.0  | 8.0   | 1.0  |
| 21UR-48080 | 0.0   | 0.0  | 0.0   | 0.0   | 1.0   | 1.0  |
| 21UR-48090 | 28.0  | 5.0  | 43.0  | 9.0   | 1.0   | 0.0  |
| 21UR-4810  | 0.0   | 0.0  | 0.0   | 0.0   | 0.0   | 0.0  |
| 21UR-48100 | 0.0   | 1.0  | 0.0   | 0.0   | 0.0   | 0.0  |
| 21UR-48110 | 0.0   | 0.0  | 0.0   | 0.0   | 0.0   | 0.0  |
| 21UR-48120 | 1.0   | 0.0  | 1.0   | 0.0   | 1.0   | 0.0  |
| 21UR-48130 | 1.0   | 0.0  | 1.0   | 0.0   | 0.0   | 0.0  |
| 21UR-48140 | 83.0  | 87.0 | 77.0  | 114.0 | 154.3 | 19.0 |
| 21UR-48150 | 1.0   | 0.0  | 1.0   | 0.0   | 0.0   | 0.0  |
| 21UR-48160 | 1.0   | 0.0  | 4.0   | 1.0   | 1.0   | 0.0  |
| 21UR-48170 | 36.5  | 17.0 | 33.0  | 10.0  | 6.0   | 5.0  |
| 21UR-48180 | 1.0   | 0.0  | 1.0   | 0.0   | 0.0   | 0.0  |
| 21UR-48190 | 0.0   | 1.0  | 1.0   | 0.0   | 0.0   | 0.0  |
| 21UR-4820  | 15.0  | 0.0  | 6.0   | 6.0   | 0.0   | 1.0  |
| 21UR-48200 | 48.0  | 9.0  | 59.0  | 18.0  | 8.0   | 0.0  |
| 21UR-48210 | 8.0   | 4.0  | 4.0   | 0.0   | 10.0  | 0.0  |
| 21UR-48220 | 1.0   | 0.0  | 2.0   | 0.0   | 2.0   | 0.0  |
| 21UR-48230 | 14.0  | 4.0  | 16.0  | 10.0  | 1.0   | 1.0  |
| 21UR-48240 | 0.0   | 0.0  | 0.0   | 0.0   | 0.0   | 0.0  |
| 21UR-48250 | 0.0   | 0.0  | 0.0   | 0.0   | 0.0   | 0.0  |
| 21UR-48260 | 1.0   | 0.0  | 1.0   | 1.0   | 0.0   | 0.0  |

|            |       |       |       |      |      |      |
|------------|-------|-------|-------|------|------|------|
| 21UR-48270 | 0.0   | 0.0   | 0.0   | 0.0  | 0.0  | 0.0  |
| 21UR-48280 | 0.0   | 1.0   | 0.0   | 0.0  | 0.0  | 0.0  |
| 21UR-48290 | 8.0   | 2.0   | 4.0   | 0.0  | 1.0  | 0.0  |
| 21UR-4830  | 0.0   | 0.0   | 0.0   | 0.0  | 0.0  | 0.0  |
| 21UR-48300 | 0.0   | 0.0   | 0.0   | 0.0  | 0.0  | 0.0  |
| 21UR-48310 | 19.0  | 8.0   | 34.0  | 8.0  | 24.0 | 0.0  |
| 21UR-48320 | 0.0   | 0.0   | 0.0   | 0.0  | 1.0  | 0.0  |
| 21UR-48350 | 131.0 | 227.0 | 177.0 | 46.0 | 38.5 | 26.0 |
| 21UR-48360 | 0.0   | 4.0   | 0.0   | 0.0  | 4.0  | 1.0  |
| 21UR-48370 | 0.0   | 6.0   | 1.0   | 0.0  | 0.0  | 0.0  |
| 21UR-48380 | 27.0  | 28.0  | 38.0  | 11.5 | 45.5 | 2.0  |
| 21UR-48390 | 1.0   | 0.0   | 0.0   | 0.0  | 0.0  | 0.0  |
| 21UR-4840  | 0.0   | 0.0   | 1.0   | 0.0  | 0.0  | 0.0  |
| 21UR-48400 | 6.0   | 1.0   | 2.0   | 0.0  | 0.0  | 0.0  |
| 21UR-48410 | 9.0   | 6.0   | 15.0  | 0.0  | 12.0 | 1.0  |
| 21UR-48420 | 0.0   | 0.0   | 0.0   | 0.0  | 0.0  | 0.0  |
| 21UR-48430 | 1.0   | 0.0   | 0.0   | 0.0  | 0.0  | 0.0  |
| 21UR-48440 | 0.0   | 0.1   | 1.0   | 1.0  | 0.0  | 0.0  |
| 21UR-48450 | 1.0   | 4.1   | 0.0   | 0.0  | 4.0  | 0.0  |
| 21UR-48460 | 1.0   | 0.0   | 0.0   | 0.0  | 0.0  | 0.0  |
| 21UR-48470 | 1.0   | 0.0   | 0.0   | 0.0  | 2.0  | 0.0  |
| 21UR-48480 | 0.0   | 2.0   | 1.0   | 0.0  | 6.0  | 0.0  |
| 21UR-48490 | 6.0   | 1.0   | 4.0   | 1.0  | 1.0  | 0.0  |
| 21UR-4850  | 0.0   | 1.0   | 0.0   | 0.0  | 0.0  | 0.0  |
| 21UR-48500 | 0.0   | 0.0   | 0.0   | 0.0  | 0.0  | 0.0  |
| 21UR-48510 | 0.0   | 0.0   | 0.0   | 0.0  | 2.0  | 0.0  |
| 21UR-48520 | 26.0  | 19.0  | 18.0  | 14.0 | 20.0 | 1.0  |
| 21UR-48530 | 0.0   | 0.0   | 0.0   | 0.0  | 0.0  | 0.0  |
| 21UR-48540 | 20.0  | 4.0   | 14.0  | 1.0  | 4.0  | 0.0  |
| 21UR-48550 | 12.0  | 1.0   | 8.0   | 4.0  | 3.0  | 1.0  |
| 21UR-48560 | 1.0   | 0.0   | 0.0   | 0.0  | 1.0  | 0.0  |
| 21UR-48580 | 3.0   | 7.0   | 5.0   | 4.0  | 30.0 | 1.0  |
| 21UR-48590 | 0.0   | 1.0   | 1.0   | 0.0  | 1.0  | 0.0  |
| 21UR-4860  | 0.0   | 10.1  | 0.0   | 0.0  | 0.0  | 0.0  |
| 21UR-48600 | 23.0  | 25.0  | 35.0  | 1.0  | 47.5 | 0.0  |
| 21UR-48610 | 3.0   | 0.0   | 1.0   | 1.0  | 0.0  | 0.0  |
| 21UR-48620 | 0.0   | 0.0   | 0.0   | 0.0  | 0.0  | 0.0  |
| 21UR-48630 | 3.0   | 0.0   | 2.0   | 1.0  | 1.0  | 0.0  |
| 21UR-48640 | 1.0   | 6.0   | 4.0   | 0.0  | 1.0  | 0.0  |
| 21UR-48650 | 28.0  | 4.0   | 41.0  | 11.0 | 15.0 | 1.0  |
| 21UR-48660 | 35.0  | 4.0   | 29.0  | 29.0 | 0.0  | 4.0  |
| 21UR-48670 | 6.0   | 0.0   | 0.0   | 0.0  | 0.0  | 0.0  |
| 21UR-48680 | 1.0   | 4.0   | 1.0   | 0.0  | 1.0  | 0.0  |
| 21UR-48690 | 7.0   | 1.0   | 10.0  | 1.0  | 2.0  | 1.0  |
| 21UR-4870  | 0.0   | 0.0   | 0.0   | 0.0  | 0.0  | 0.0  |
| 21UR-48700 | 0.0   | 0.0   | 0.0   | 0.0  | 1.0  | 0.0  |
| 21UR-48710 | 0.0   | 2.0   | 1.0   | 0.0  | 0.0  | 0.0  |
| 21UR-48720 | 0.0   | 1.5   | 0.0   | 0.0  | 1.0  | 0.0  |
| 21UR-48730 | 31.0  | 56.5  | 42.0  | 8.0  | 99.0 | 4.0  |
| 21UR-48740 | 131.0 | 36.0  | 144.7 | 56.0 | 31.0 | 3.0  |
| 21UR-48750 | 0.0   | 0.0   | 0.0   | 0.0  | 0.0  | 0.0  |

|            |        |       |        |        |       |      |
|------------|--------|-------|--------|--------|-------|------|
| 21UR-48760 | 0.0    | 0.0   | 0.0    | 0.0    | 2.0   | 0.0  |
| 21UR-48770 | 29.0   | 3.0   | 18.0   | 8.0    | 7.0   | 0.0  |
| 21UR-48780 | 0.0    | 3.0   | 0.0    | 0.0    | 0.0   | 0.0  |
| 21UR-48790 | 26.0   | 2.0   | 15.0   | 9.0    | 4.0   | 0.0  |
| 21UR-4880  | 42.0   | 0.0   | 24.0   | 9.0    | 0.0   | 0.0  |
| 21UR-48800 | 4.0    | 3.0   | 6.0    | 1.0    | 10.0  | 0.0  |
| 21UR-48810 | 125.0  | 27.0  | 88.0   | 64.0   | 39.0  | 6.0  |
| 21UR-48820 | 12.0   | 19.0  | 12.0   | 6.0    | 17.0  | 0.0  |
| 21UR-48830 | 209.0  | 50.0  | 206.0  | 80.0   | 359.0 | 4.0  |
| 21UR-48840 | 4.0    | 0.0   | 4.0    | 1.0    | 0.0   | 0.0  |
| 21UR-48850 | 0.0    | 0.0   | 0.0    | 0.0    | 0.0   | 0.0  |
| 21UR-48860 | 1.0    | 0.0   | 0.0    | 0.0    | 0.0   | 0.0  |
| 21UR-48870 | 0.0    | 0.0   | 0.0    | 0.0    | 0.0   | 0.0  |
| 21UR-48880 | 1.0    | 0.0   | 0.0    | 0.0    | 0.0   | 0.0  |
| 21UR-48890 | 0.0    | 0.0   | 0.0    | 0.0    | 0.0   | 0.0  |
| 21UR-4890  | 4.0    | 1.0   | 6.0    | 1.0    | 2.0   | 0.0  |
| 21UR-48900 | 46.0   | 6.0   | 53.0   | 15.0   | 6.0   | 0.0  |
| 21UR-48910 | 0.0    | 0.0   | 0.0    | 0.0    | 0.0   | 0.0  |
| 21UR-48920 | 0.0    | 0.0   | 0.0    | 0.0    | 0.0   | 0.0  |
| 21UR-48930 | 154.5  | 38.0  | 95.0   | 40.0   | 84.7  | 6.0  |
| 21UR-48940 | 0.0    | 0.0   | 1.0    | 0.0    | 0.0   | 1.0  |
| 21UR-48950 | 7821.3 | 500.0 | 5179.0 | 3684.0 | 575.7 | 52.0 |
| 21UR-48960 | 0.0    | 0.0   | 0.0    | 0.0    | 0.0   | 0.0  |
| 21UR-48970 | 0.0    | 0.0   | 0.0    | 1.0    | 0.0   | 0.0  |
| 21UR-48980 | 9.0    | 0.0   | 0.0    | 1.0    | 1.0   | 4.0  |
| 21UR-48990 | 25.0   | 12.0  | 26.0   | 20.0   | 1.0   | 3.0  |
| 21UR-490   | 18.5   | 2.0   | 12.0   | 2.0    | 2.0   | 0.0  |
| 21UR-4900  | 18.0   | 8.0   | 16.0   | 3.0    | 8.0   | 0.0  |
| 21UR-49000 | 0.0    | 0.0   | 0.0    | 1.0    | 0.0   | 0.0  |
| 21UR-49010 | 6.0    | 8.0   | 4.0    | 1.0    | 48.1  | 1.0  |
| 21UR-49020 | 7.0    | 5.0   | 16.0   | 5.0    | 11.0  | 2.0  |
| 21UR-49030 | 4.0    | 2.0   | 1.0    | 1.0    | 2.0   | 4.0  |
| 21UR-49040 | 35.0   | 1.0   | 29.0   | 9.0    | 10.0  | 1.0  |
| 21UR-49050 | 15.0   | 60.5  | 20.0   | 20.0   | 43.5  | 8.0  |
| 21UR-49060 | 0.0    | 0.0   | 3.0    | 0.0    | 0.0   | 0.0  |
| 21UR-49070 | 1.0    | 0.0   | 0.0    | 1.0    | 0.0   | 0.0  |
| 21UR-49080 | 1.0    | 0.0   | 8.0    | 0.0    | 1.0   | 0.0  |
| 21UR-49090 | 4.0    | 0.0   | 10.0   | 1.0    | 1.0   | 0.0  |
| 21UR-4910  | 0.0    | 0.0   | 0.0    | 0.0    | 0.0   | 0.0  |
| 21UR-49100 | 1.0    | 0.0   | 4.0    | 2.0    | 0.0   | 0.0  |
| 21UR-49110 | 1.0    | 4.0   | 3.0    | 0.0    | 0.0   | 0.0  |
| 21UR-49120 | 1.0    | 11.0  | 3.5    | 1.0    | 18.0  | 2.0  |
| 21UR-49130 | 0.0    | 0.0   | 0.0    | 0.0    | 0.0   | 0.0  |
| 21UR-49140 | 0.0    | 1.0   | 1.0    | 0.0    | 1.0   | 4.0  |
| 21UR-49150 | 0.0    | 0.0   | 1.0    | 1.0    | 0.0   | 0.0  |
| 21UR-49160 | 0.0    | 0.0   | 0.0    | 2.0    | 0.0   | 1.0  |
| 21UR-49170 | 0.0    | 1.0   | 0.0    | 0.0    | 0.0   | 0.0  |
| 21UR-49180 | 0.0    | 0.0   | 10.0   | 0.0    | 0.0   | 0.0  |
| 21UR-49190 | 4.0    | 0.0   | 0.0    | 0.0    | 0.0   | 0.0  |
| 21UR-4920  | 74.0   | 84.0  | 49.5   | 29.0   | 51.0  | 2.0  |
| 21UR-49200 | 6.0    | 1.0   | 1.0    | 1.0    | 5.0   | 0.0  |

|            |       |      |       |      |       |      |
|------------|-------|------|-------|------|-------|------|
| 21UR-49210 | 0.0   | 0.0  | 0.0   | 0.0  | 0.0   | 0.0  |
| 21UR-49220 | 24.0  | 70.0 | 27.0  | 11.0 | 85.0  | 8.0  |
| 21UR-49230 | 0.0   | 0.0  | 1.0   | 0.0  | 0.0   | 0.0  |
| 21UR-49240 | 0.0   | 0.0  | 0.0   | 0.0  | 0.0   | 0.0  |
| 21UR-49250 | 1.0   | 0.0  | 1.0   | 0.0  | 0.0   | 0.0  |
| 21UR-49260 | 0.0   | 0.0  | 0.0   | 0.0  | 0.0   | 0.0  |
| 21UR-49270 | 0.0   | 0.0  | 0.0   | 0.0  | 1.0   | 0.0  |
| 21UR-49280 | 0.0   | 0.0  | 0.0   | 0.0  | 0.0   | 0.0  |
| 21UR-49290 | 1.0   | 0.0  | 1.0   | 0.0  | 4.0   | 0.0  |
| 21UR-4930  | 0.0   | 1.0  | 0.0   | 0.0  | 0.0   | 0.0  |
| 21UR-49300 | 16.0  | 17.0 | 7.0   | 22.0 | 11.0  | 10.0 |
| 21UR-49310 | 14.0  | 4.0  | 12.0  | 1.0  | 11.0  | 0.0  |
| 21UR-49320 | 0.0   | 0.0  | 0.0   | 0.0  | 1.0   | 0.0  |
| 21UR-49330 | 0.0   | 0.0  | 0.0   | 0.0  | 0.0   | 0.0  |
| 21UR-49340 | 0.0   | 13.0 | 4.0   | 3.0  | 20.0  | 8.0  |
| 21UR-49350 | 1.0   | 1.0  | 0.0   | 0.0  | 0.0   | 0.0  |
| 21UR-49360 | 4.0   | 1.0  | 1.0   | 0.0  | 2.0   | 0.0  |
| 21UR-49370 | 0.0   | 0.0  | 1.0   | 0.0  | 0.0   | 0.0  |
| 21UR-49380 | 0.0   | 0.0  | 0.0   | 0.0  | 0.0   | 0.0  |
| 21UR-49390 | 102.0 | 9.0  | 117.0 | 32.0 | 20.0  | 7.0  |
| 21UR-4940  | 28.0  | 10.0 | 38.5  | 15.0 | 14.0  | 5.0  |
| 21UR-49400 | 0.0   | 0.0  | 0.0   | 0.0  | 2.0   | 0.0  |
| 21UR-49410 | 4.0   | 1.0  | 1.0   | 0.0  | 0.0   | 0.1  |
| 21UR-49420 | 0.0   | 0.0  | 0.0   | 0.0  | 4.0   | 0.0  |
| 21UR-49430 | 62.0  | 16.8 | 42.0  | 6.0  | 18.5  | 2.1  |
| 21UR-49440 | 0.0   | 0.0  | 0.0   | 0.0  | 0.0   | 0.0  |
| 21UR-49450 | 0.0   | 0.3  | 0.0   | 0.0  | 0.0   | 0.0  |
| 21UR-49460 | 0.0   | 1.0  | 0.0   | 0.0  | 0.0   | 0.0  |
| 21UR-49470 | 14.0  | 0.0  | 8.0   | 2.0  | 1.0   | 0.0  |
| 21UR-49480 | 0.0   | 0.0  | 0.0   | 0.0  | 1.0   | 0.0  |
| 21UR-49490 | 4.0   | 13.0 | 1.0   | 0.0  | 23.0  | 3.0  |
| 21UR-4950  | 0.0   | 0.0  | 0.0   | 0.0  | 0.0   | 0.0  |
| 21UR-49500 | 4.0   | 1.0  | 1.0   | 0.0  | 7.0   | 1.0  |
| 21UR-49510 | 0.0   | 0.0  | 0.0   | 0.0  | 1.0   | 0.0  |
| 21UR-49520 | 0.0   | 0.0  | 1.0   | 1.0  | 1.0   | 0.0  |
| 21UR-49530 | 169.0 | 55.0 | 161.3 | 77.0 | 138.0 | 6.0  |
| 21UR-49540 | 0.0   | 0.0  | 0.0   | 0.0  | 0.0   | 0.0  |
| 21UR-49550 | 4.0   | 1.0  | 4.0   | 0.0  | 0.0   | 0.0  |
| 21UR-49560 | 0.0   | 0.0  | 1.0   | 0.0  | 0.0   | 0.0  |
| 21UR-49570 | 1.0   | 1.0  | 0.0   | 0.0  | 0.0   | 0.0  |
| 21UR-49580 | 0.0   | 0.0  | 0.0   | 0.0  | 0.0   | 0.0  |
| 21UR-49590 | 4.0   | 0.0  | 0.0   | 0.0  | 0.0   | 0.0  |
| 21UR-4960  | 4.0   | 0.0  | 1.0   | 0.0  | 1.0   | 0.0  |
| 21UR-49600 | 24.0  | 32.0 | 28.0  | 21.0 | 63.0  | 3.0  |
| 21UR-49610 | 5.0   | 11.0 | 6.0   | 5.0  | 16.3  | 4.0  |
| 21UR-49620 | 3.0   | 9.0  | 16.0  | 4.0  | 55.3  | 4.0  |
| 21UR-49630 | 0.0   | 0.0  | 4.0   | 0.0  | 0.0   | 0.0  |
| 21UR-49640 | 0.0   | 0.0  | 0.0   | 0.0  | 0.0   | 2.0  |
| 21UR-49650 | 0.0   | 0.0  | 0.0   | 0.0  | 0.0   | 0.0  |
| 21UR-49660 | 0.0   | 0.0  | 0.0   | 0.0  | 0.0   | 1.0  |
| 21UR-49670 | 24.0  | 8.2  | 24.0  | 12.0 | 6.0   | 0.0  |

|            |       |       |       |       |       |      |
|------------|-------|-------|-------|-------|-------|------|
| 21UR-49680 | 0.0   | 1.0   | 0.0   | 0.0   | 0.0   | 2.0  |
| 21UR-49690 | 65.0  | 0.0   | 39.0  | 16.0  | 3.0   | 1.0  |
| 21UR-4970  | 0.0   | 0.0   | 0.0   | 0.0   | 1.0   | 0.0  |
| 21UR-49700 | 225.5 | 134.1 | 180.0 | 69.0  | 155.0 | 24.0 |
| 21UR-49710 | 6.0   | 0.0   | 4.0   | 1.0   | 4.0   | 0.0  |
| 21UR-49720 | 384.0 | 59.0  | 275.0 | 180.0 | 67.0  | 8.0  |
| 21UR-49730 | 0.0   | 0.0   | 0.0   | 0.0   | 1.0   | 0.0  |
| 21UR-49740 | 7.0   | 2.0   | 4.0   | 1.0   | 1.0   | 0.0  |
| 21UR-49750 | 2.0   | 0.0   | 1.0   | 0.0   | 0.0   | 0.0  |
| 21UR-49760 | 387.0 | 27.0  | 303.0 | 143.0 | 21.0  | 8.0  |
| 21UR-49770 | 0.0   | 0.0   | 1.0   | 0.0   | 0.0   | 0.0  |
| 21UR-49780 | 73.0  | 219.0 | 85.0  | 63.0  | 134.0 | 42.0 |
| 21UR-49790 | 0.0   | 2.0   | 1.0   | 0.0   | 0.0   | 0.0  |
| 21UR-4980  | 0.0   | 1.0   | 0.0   | 0.0   | 0.0   | 1.0  |
| 21UR-49800 | 0.0   | 0.0   | 0.0   | 0.0   | 0.0   | 0.0  |
| 21UR-49820 | 1.0   | 1.0   | 1.0   | 1.0   | 4.0   | 0.0  |
| 21UR-49830 | 0.0   | 1.5   | 0.0   | 0.0   | 0.0   | 0.0  |
| 21UR-49840 | 0.0   | 0.0   | 0.0   | 0.0   | 0.0   | 0.0  |
| 21UR-49850 | 87.0  | 28.0  | 79.0  | 43.0  | 31.0  | 6.0  |
| 21UR-49860 | 1.0   | 4.0   | 1.0   | 0.0   | 5.0   | 1.0  |
| 21UR-49870 | 1.0   | 1.0   | 4.0   | 0.0   | 0.5   | 0.0  |
| 21UR-49880 | 1.0   | 0.0   | 0.0   | 0.0   | 1.0   | 0.0  |
| 21UR-49890 | 0.0   | 4.0   | 0.0   | 1.0   | 2.0   | 0.0  |
| 21UR-4990  | 0.0   | 0.0   | 0.0   | 0.0   | 0.0   | 0.0  |
| 21UR-49900 | 1.0   | 1.0   | 0.0   | 0.0   | 0.0   | 1.0  |
| 21UR-49910 | 20.0  | 9.0   | 19.0  | 8.0   | 11.0  | 0.0  |
| 21UR-49920 | 8.0   | 0.0   | 6.0   | 2.0   | 0.0   | 0.0  |
| 21UR-49930 | 0.0   | 1.0   | 0.0   | 0.0   | 0.0   | 0.0  |
| 21UR-49940 | 1.0   | 0.0   | 5.0   | 0.0   | 4.0   | 0.0  |
| 21UR-49950 | 0.0   | 0.0   | 0.0   | 0.0   | 0.0   | 0.0  |
| 21UR-49960 | 0.0   | 0.0   | 0.0   | 0.0   | 0.0   | 0.0  |
| 21UR-49970 | 14.0  | 1.0   | 6.0   | 0.0   | 0.0   | 0.0  |
| 21UR-49980 | 0.0   | 0.0   | 0.0   | 0.0   | 0.0   | 0.0  |
| 21UR-49990 | 0.0   | 0.0   | 1.0   | 0.0   | 2.5   | 0.0  |
| 21UR-50    | 0.0   | 0.0   | 1.0   | 0.0   | 0.0   | 0.0  |
| 21UR-500   | 1.0   | 9.0   | 1.0   | 1.0   | 7.0   | 1.0  |
| 21UR-5000  | 0.0   | 0.0   | 0.0   | 0.0   | 0.0   | 0.0  |
| 21UR-50000 | 16.3  | 39.0  | 28.0  | 31.5  | 13.5  | 10.0 |
| 21UR-50010 | 1.0   | 0.0   | 0.0   | 0.0   | 0.0   | 0.0  |
| 21UR-50020 | 0.0   | 0.0   | 0.0   | 0.0   | 0.0   | 0.0  |
| 21UR-50030 | 0.0   | 0.0   | 0.0   | 0.0   | 0.0   | 0.0  |
| 21UR-50040 | 0.0   | 0.0   | 0.0   | 0.0   | 0.0   | 0.0  |
| 21UR-50050 | 0.0   | 0.0   | 0.0   | 0.0   | 0.0   | 0.0  |
| 21UR-50060 | 6.0   | 1.0   | 1.0   | 0.0   | 4.7   | 0.1  |
| 21UR-50070 | 0.0   | 2.0   | 0.0   | 0.0   | 0.0   | 0.0  |
| 21UR-50080 | 4.0   | 3.0   | 1.0   | 0.0   | 16.0  | 4.0  |
| 21UR-50090 | 8.0   | 0.0   | 3.0   | 0.0   | 2.0   | 0.0  |
| 21UR-5010  | 1.0   | 0.0   | 1.0   | 0.0   | 0.0   | 0.0  |
| 21UR-50100 | 0.0   | 1.0   | 0.0   | 0.0   | 3.0   | 0.0  |
| 21UR-50110 | 0.0   | 0.0   | 0.0   | 0.0   | 0.0   | 0.0  |
| 21UR-50120 | 0.0   | 0.0   | 0.0   | 0.0   | 0.0   | 0.0  |

|            |       |       |       |       |       |      |
|------------|-------|-------|-------|-------|-------|------|
| 21UR-50130 | 0.0   | 0.0   | 0.0   | 0.0   | 0.0   | 0.0  |
| 21UR-50140 | 0.0   | 0.0   | 0.0   | 0.0   | 0.0   | 0.0  |
| 21UR-50150 | 0.0   | 0.0   | 1.0   | 0.0   | 1.0   | 0.0  |
| 21UR-50160 | 0.0   | 0.0   | 0.0   | 0.0   | 4.0   | 0.0  |
| 21UR-50170 | 299.0 | 55.0  | 240.0 | 205.0 | 205.0 | 10.0 |
| 21UR-50190 | 4.0   | 0.0   | 4.0   | 2.0   | 1.0   | 0.0  |
| 21UR-5020  | 15.0  | 1.0   | 3.0   | 7.0   | 0.0   | 1.0  |
| 21UR-50200 | 0.0   | 0.0   | 0.0   | 1.0   | 0.0   | 0.0  |
| 21UR-50210 | 0.0   | 0.0   | 4.0   | 1.0   | 4.0   | 0.0  |
| 21UR-50220 | 2.0   | 0.0   | 0.0   | 0.0   | 0.0   | 0.0  |
| 21UR-50230 | 16.0  | 1.0   | 14.0  | 0.0   | 1.0   | 0.0  |
| 21UR-50240 | 0.0   | 0.0   | 0.0   | 0.0   | 0.0   | 0.0  |
| 21UR-50250 | 70.0  | 131.0 | 95.0  | 38.0  | 191.0 | 26.0 |
| 21UR-50260 | 12.0  | 4.0   | 19.0  | 8.0   | 3.0   | 0.0  |
| 21UR-50270 | 0.0   | 0.0   | 2.0   | 0.0   | 0.1   | 0.0  |
| 21UR-50280 | 0.0   | 0.0   | 0.0   | 0.0   | 0.0   | 0.0  |
| 21UR-50290 | 76.0  | 1.1   | 65.0  | 22.0  | 3.0   | 1.0  |
| 21UR-5030  | 65.0  | 37.0  | 34.0  | 13.0  | 3.0   | 0.0  |
| 21UR-50300 | 21.0  | 1.0   | 21.5  | 8.0   | 4.0   | 0.0  |
| 21UR-50310 | 10.0  | 19.0  | 4.0   | 4.0   | 18.0  | 1.0  |
| 21UR-50320 | 64.0  | 7.0   | 42.0  | 7.0   | 13.0  | 0.0  |
| 21UR-50330 | 0.0   | 0.0   | 0.0   | 0.0   | 0.0   | 0.0  |
| 21UR-50340 | 108.0 | 8.0   | 115.0 | 23.0  | 21.0  | 7.0  |
| 21UR-50350 | 0.0   | 0.0   | 0.0   | 0.0   | 1.0   | 0.0  |
| 21UR-50360 | 1.0   | 0.0   | 1.0   | 0.0   | 0.0   | 0.0  |
| 21UR-50370 | 2.0   | 0.0   | 0.0   | 0.0   | 0.0   | 0.0  |
| 21UR-50380 | 4.0   | 0.0   | 0.0   | 0.0   | 0.0   | 0.0  |
| 21UR-50390 | 0.0   | 0.0   | 0.0   | 0.0   | 0.0   | 0.0  |
| 21UR-5040  | 0.0   | 0.0   | 0.0   | 0.0   | 0.0   | 0.0  |
| 21UR-50400 | 0.0   | 0.0   | 0.0   | 0.0   | 0.0   | 0.0  |
| 21UR-50410 | 5.0   | 19.0  | 1.0   | 2.0   | 4.0   | 0.0  |
| 21UR-50420 | 11.0  | 4.0   | 13.0  | 1.0   | 0.0   | 0.0  |
| 21UR-50430 | 0.0   | 0.0   | 0.0   | 0.0   | 0.0   | 0.0  |
| 21UR-50440 | 0.0   | 0.0   | 0.0   | 0.0   | 0.0   | 0.0  |
| 21UR-50450 | 94.0  | 46.0  | 126.0 | 141.0 | 18.0  | 6.0  |
| 21UR-50460 | 0.0   | 0.0   | 0.0   | 0.0   | 0.0   | 0.0  |
| 21UR-50470 | 0.0   | 1.0   | 0.0   | 0.0   | 0.0   | 0.0  |
| 21UR-50480 | 0.0   | 0.0   | 0.0   | 0.0   | 0.0   | 0.0  |
| 21UR-50490 | 0.0   | 0.0   | 1.0   | 0.0   | 0.0   | 0.0  |
| 21UR-5050  | 1.0   | 1.0   | 0.0   | 0.0   | 4.0   | 0.0  |
| 21UR-50500 | 0.0   | 0.0   | 0.0   | 0.0   | 0.0   | 0.0  |
| 21UR-50510 | 0.0   | 0.0   | 0.0   | 0.0   | 0.0   | 0.0  |
| 21UR-50520 | 17.0  | 3.0   | 21.0  | 1.0   | 1.0   | 1.0  |
| 21UR-50530 | 22.0  | 16.0  | 10.0  | 15.0  | 27.0  | 12.0 |
| 21UR-50540 | 1.0   | 1.0   | 0.0   | 0.0   | 1.0   | 0.0  |
| 21UR-50550 | 0.0   | 0.0   | 0.0   | 0.0   | 0.0   | 0.0  |
| 21UR-50560 | 4.0   | 0.0   | 0.0   | 0.0   | 0.0   | 0.0  |
| 21UR-50570 | 16.0  | 0.0   | 2.0   | 6.0   | 3.0   | 0.0  |
| 21UR-50580 | 8.0   | 13.0  | 8.0   | 7.0   | 29.7  | 8.0  |
| 21UR-50590 | 0.0   | 0.0   | 4.0   | 1.0   | 0.0   | 0.0  |
| 21UR-5060  | 0.0   | 0.0   | 4.0   | 0.0   | 0.0   | 1.0  |



|            |       |       |       |       |      |      |
|------------|-------|-------|-------|-------|------|------|
| 21UR-50600 | 6.0   | 4.0   | 3.0   | 7.0   | 6.0  | 0.0  |
| 21UR-50610 | 1.0   | 1.0   | 4.0   | 0.0   | 1.0  | 0.0  |
| 21UR-50620 | 4.0   | 0.0   | 0.0   | 0.0   | 0.0  | 0.0  |
| 21UR-50630 | 0.0   | 1.0   | 1.0   | 0.0   | 0.0  | 0.0  |
| 21UR-50640 | 0.0   | 0.0   | 0.0   | 0.0   | 0.0  | 0.0  |
| 21UR-50650 | 1.0   | 1.0   | 0.0   | 0.0   | 0.0  | 0.0  |
| 21UR-50660 | 0.0   | 0.0   | 0.0   | 0.0   | 1.0  | 0.0  |
| 21UR-50670 | 0.0   | 11.0  | 6.0   | 0.0   | 4.0  | 2.0  |
| 21UR-50680 | 1.0   | 0.0   | 0.0   | 0.0   | 0.0  | 0.0  |
| 21UR-50690 | 12.0  | 1.0   | 6.0   | 1.0   | 1.0  | 0.0  |
| 21UR-5070  | 64.0  | 17.0  | 56.0  | 25.0  | 74.0 | 5.0  |
| 21UR-50700 | 0.0   | 1.0   | 0.0   | 0.0   | 0.0  | 0.0  |
| 21UR-50710 | 1.0   | 0.0   | 0.0   | 0.0   | 0.0  | 0.0  |
| 21UR-50720 | 0.0   | 7.2   | 0.0   | 1.0   | 14.0 | 4.0  |
| 21UR-50730 | 10.0  | 1.0   | 7.0   | 0.0   | 18.0 | 0.0  |
| 21UR-50740 | 0.0   | 0.0   | 0.0   | 0.0   | 0.0  | 0.0  |
| 21UR-50760 | 0.0   | 0.0   | 0.0   | 0.0   | 0.0  | 0.0  |
| 21UR-50770 | 71.0  | 27.0  | 37.0  | 27.0  | 11.0 | 2.0  |
| 21UR-50780 | 0.0   | 0.0   | 0.0   | 0.0   | 0.0  | 0.0  |
| 21UR-50790 | 0.0   | 0.0   | 0.0   | 0.0   | 0.0  | 0.0  |
| 21UR-5080  | 0.0   | 0.0   | 0.0   | 0.0   | 0.0  | 0.0  |
| 21UR-50800 | 0.0   | 0.0   | 0.0   | 0.0   | 0.0  | 0.0  |
| 21UR-50810 | 4.0   | 1.0   | 4.0   | 6.0   | 3.0  | 8.0  |
| 21UR-50820 | 1.0   | 5.5   | 2.0   | 2.0   | 4.0  | 0.0  |
| 21UR-50830 | 1.0   | 7.0   | 5.0   | 0.0   | 1.0  | 2.0  |
| 21UR-50840 | 7.0   | 3.1   | 4.0   | 0.5   | 4.0  | 0.1  |
| 21UR-50850 | 4.0   | 7.0   | 0.0   | 0.0   | 0.0  | 0.0  |
| 21UR-50860 | 10.0  | 10.0  | 7.0   | 0.0   | 41.0 | 4.0  |
| 21UR-50870 | 0.0   | 0.0   | 0.0   | 0.0   | 4.0  | 0.0  |
| 21UR-50880 | 0.0   | 0.0   | 0.0   | 0.0   | 0.0  | 0.0  |
| 21UR-50890 | 1.0   | 2.0   | 0.0   | 0.0   | 1.0  | 1.0  |
| 21UR-5090  | 1.0   | 1.0   | 4.0   | 0.0   | 1.0  | 0.0  |
| 21UR-50900 | 0.0   | 4.0   | 1.0   | 0.0   | 5.0  | 0.0  |
| 21UR-50910 | 0.0   | 0.0   | 0.0   | 0.0   | 0.0  | 0.0  |
| 21UR-50920 | 2.0   | 0.0   | 6.0   | 0.0   | 0.0  | 0.0  |
| 21UR-50930 | 6.0   | 1.0   | 4.0   | 1.0   | 0.0  | 0.0  |
| 21UR-50940 | 0.0   | 1.0   | 0.0   | 0.0   | 1.0  | 0.0  |
| 21UR-50950 | 0.0   | 0.0   | 0.0   | 0.0   | 0.0  | 0.0  |
| 21UR-50960 | 81.0  | 23.3  | 52.0  | 9.0   | 3.0  | 0.0  |
| 21UR-50970 | 40.0  | 21.3  | 35.0  | 23.0  | 29.0 | 0.0  |
| 21UR-50980 | 6.0   | 1.0   | 4.0   | 0.0   | 6.0  | 0.0  |
| 21UR-50990 | 0.0   | 0.0   | 0.0   | 0.0   | 0.0  | 0.0  |
| 21UR-510   | 165.3 | 64.2  | 184.0 | 121.0 | 92.0 | 2.1  |
| 21UR-5100  | 0.0   | 0.0   | 0.0   | 0.0   | 0.0  | 0.0  |
| 21UR-51000 | 0.0   | 0.0   | 0.0   | 0.0   | 0.0  | 1.0  |
| 21UR-51010 | 8.0   | 1.0   | 4.0   | 0.0   | 0.0  | 0.2  |
| 21UR-51020 | 0.0   | 0.0   | 0.0   | 0.0   | 0.0  | 0.0  |
| 21UR-51030 | 1.0   | 2.0   | 5.0   | 0.0   | 1.0  | 0.0  |
| 21UR-51040 | 0.0   | 0.0   | 1.0   | 0.0   | 0.0  | 0.0  |
| 21UR-51050 | 438.0 | 158.0 | 236.0 | 96.0  | 72.7 | 18.0 |
| 21UR-51060 | 0.0   | 0.0   | 0.0   | 0.0   | 0.0  | 0.0  |

|            |        |       |        |       |       |      |
|------------|--------|-------|--------|-------|-------|------|
| 21UR-51070 | 12.0   | 1.0   | 6.0    | 3.0   | 2.0   | 0.0  |
| 21UR-51080 | 0.0    | 1.0   | 0.0    | 0.0   | 0.0   | 0.0  |
| 21UR-51090 | 1773.0 | 137.0 | 1277.0 | 618.0 | 281.0 | 6.0  |
| 21UR-5110  | 0.0    | 0.0   | 0.0    | 1.0   | 8.0   | 0.0  |
| 21UR-51100 | 8.0    | 1.0   | 1.0    | 0.0   | 2.0   | 2.0  |
| 21UR-51110 | 14.0   | 6.0   | 8.0    | 2.0   | 15.0  | 0.0  |
| 21UR-51120 | 20.0   | 1.0   | 12.5   | 6.0   | 15.0  | 0.0  |
| 21UR-51130 | 0.0    | 0.0   | 0.0    | 0.0   | 0.0   | 0.0  |
| 21UR-51140 | 0.0    | 0.0   | 0.0    | 0.0   | 0.0   | 0.0  |
| 21UR-51150 | 0.0    | 0.0   | 0.0    | 0.0   | 0.0   | 0.0  |
| 21UR-51160 | 0.0    | 1.0   | 0.0    | 0.0   | 0.0   | 0.0  |
| 21UR-51170 | 0.0    | 0.0   | 1.0    | 0.0   | 0.0   | 0.0  |
| 21UR-51180 | 1.0    | 2.0   | 0.0    | 6.0   | 13.0  | 1.0  |
| 21UR-51190 | 0.0    | 1.0   | 0.0    | 0.0   | 7.0   | 0.0  |
| 21UR-5120  | 22.0   | 68.0  | 21.0   | 4.0   | 39.3  | 11.0 |
| 21UR-51200 | 35.0   | 3.1   | 34.0   | 5.0   | 1.0   | 1.0  |
| 21UR-51210 | 0.0    | 0.0   | 0.0    | 0.0   | 0.0   | 0.0  |
| 21UR-51220 | 41.0   | 43.7  | 36.0   | 11.0  | 10.0  | 8.0  |
| 21UR-51230 | 0.0    | 1.0   | 4.0    | 0.0   | 8.0   | 0.0  |
| 21UR-51240 | 0.0    | 14.0  | 4.0    | 4.0   | 4.0   | 4.0  |
| 21UR-51250 | 0.0    | 0.0   | 0.0    | 0.0   | 0.0   | 0.0  |
| 21UR-51260 | 0.0    | 0.0   | 0.0    | 0.0   | 0.0   | 0.0  |
| 21UR-51270 | 0.0    | 0.0   | 0.0    | 0.0   | 0.0   | 0.0  |
| 21UR-51280 | 0.0    | 0.1   | 1.0    | 4.0   | 0.0   | 0.0  |
| 21UR-51290 | 0.0    | 4.0   | 1.0    | 1.0   | 0.0   | 1.0  |
| 21UR-5130  | 0.0    | 0.0   | 0.0    | 0.0   | 0.0   | 0.0  |
| 21UR-51300 | 4.0    | 1.0   | 1.0    | 1.0   | 0.0   | 0.0  |
| 21UR-51310 | 0.0    | 0.0   | 0.0    | 0.0   | 0.0   | 0.0  |
| 21UR-51320 | 1.0    | 0.0   | 4.0    | 0.0   | 3.0   | 0.0  |
| 21UR-51330 | 79.0   | 42.0  | 89.0   | 35.0  | 20.0  | 8.0  |
| 21UR-51340 | 0.0    | 18.0  | 6.0    | 0.0   | 2.0   | 5.0  |
| 21UR-51350 | 0.0    | 0.0   | 0.0    | 0.0   | 0.0   | 0.0  |
| 21UR-51360 | 6.0    | 0.0   | 5.0    | 4.0   | 0.0   | 0.0  |
| 21UR-51370 | 0.0    | 0.0   | 0.0    | 0.0   | 0.0   | 0.0  |
| 21UR-51380 | 4.0    | 3.0   | 0.0    | 0.0   | 3.0   | 0.0  |
| 21UR-51390 | 4.0    | 2.0   | 3.0    | 4.0   | 1.0   | 1.0  |
| 21UR-5140  | 0.0    | 4.0   | 0.0    | 0.0   | 6.0   | 1.0  |
| 21UR-51400 | 1920.2 | 39.0  | 1651.0 | 702.0 | 146.0 | 0.0  |
| 21UR-51410 | 0.0    | 0.0   | 1.0    | 0.0   | 4.0   | 0.0  |
| 21UR-51420 | 0.0    | 0.0   | 1.0    | 0.0   | 1.0   | 0.0  |
| 21UR-51430 | 14.0   | 8.0   | 21.0   | 0.0   | 13.0  | 1.0  |
| 21UR-51440 | 10.0   | 8.0   | 13.0   | 0.0   | 0.0   | 1.0  |
| 21UR-51450 | 4.0    | 0.0   | 0.0    | 0.0   | 0.0   | 0.0  |
| 21UR-51460 | 1.0    | 0.0   | 6.0    | 6.0   | 1.0   | 0.0  |
| 21UR-51470 | 0.0    | 0.0   | 0.0    | 0.0   | 0.0   | 0.0  |
| 21UR-51480 | 0.0    | 0.0   | 0.0    | 0.0   | 1.0   | 0.0  |
| 21UR-51490 | 0.0    | 0.0   | 0.0    | 0.0   | 0.0   | 0.0  |
| 21UR-5150  | 0.0    | 0.0   | 0.0    | 0.0   | 0.0   | 0.0  |
| 21UR-51500 | 1.0    | 1.0   | 1.0    | 1.0   | 0.0   | 0.0  |
| 21UR-51510 | 0.0    | 4.0   | 0.0    | 0.0   | 1.0   | 0.0  |
| 21UR-51520 | 4.0    | 17.0  | 9.0    | 3.0   | 47.0  | 6.0  |

|            |        |       |        |        |       |      |
|------------|--------|-------|--------|--------|-------|------|
| 21UR-51530 | 8.0    | 0.0   | 5.0    | 0.0    | 0.0   | 0.0  |
| 21UR-51540 | 11.0   | 4.0   | 15.0   | 10.0   | 9.0   | 0.0  |
| 21UR-51550 | 53.0   | 17.0  | 72.0   | 11.0   | 34.0  | 0.0  |
| 21UR-51560 | 28.0   | 4.0   | 28.0   | 8.0    | 3.0   | 1.0  |
| 21UR-51570 | 4.0    | 1.0   | 0.0    | 1.0    | 5.0   | 0.0  |
| 21UR-51580 | 4.0    | 0.0   | 6.0    | 3.0    | 13.0  | 0.0  |
| 21UR-51590 | 0.0    | 0.0   | 0.0    | 0.0    | 0.0   | 0.0  |
| 21UR-5160  | 18.0   | 8.5   | 18.0   | 13.0   | 17.0  | 0.0  |
| 21UR-51600 | 8.0    | 2.0   | 23.0   | 4.0    | 8.0   | 1.0  |
| 21UR-51610 | 0.0    | 0.0   | 0.0    | 0.0    | 0.0   | 0.0  |
| 21UR-51620 | 1.0    | 0.0   | 0.0    | 0.0    | 0.0   | 0.0  |
| 21UR-51630 | 0.0    | 0.0   | 0.0    | 0.0    | 0.0   | 0.0  |
| 21UR-51640 | 0.0    | 0.0   | 1.0    | 0.0    | 4.0   | 0.0  |
| 21UR-51650 | 84.0   | 6.0   | 64.0   | 34.0   | 5.0   | 0.0  |
| 21UR-51660 | 38.0   | 18.0  | 8.0    | 7.0    | 25.0  | 2.0  |
| 21UR-51670 | 0.0    | 13.0  | 6.0    | 2.0    | 15.0  | 3.0  |
| 21UR-51680 | 0.0    | 0.0   | 0.0    | 0.0    | 0.0   | 0.0  |
| 21UR-51690 | 12.0   | 4.0   | 20.0   | 1.0    | 26.0  | 1.0  |
| 21UR-5170  | 0.0    | 0.0   | 0.0    | 0.0    | 0.0   | 0.0  |
| 21UR-51700 | 2760.0 | 218.0 | 2132.0 | 816.5  | 555.0 | 41.0 |
| 21UR-51710 | 1.0    | 0.0   | 0.0    | 0.0    | 1.0   | 0.0  |
| 21UR-51720 | 5.0    | 17.0  | 8.0    | 0.0    | 4.0   | 0.0  |
| 21UR-51730 | 1.0    | 0.0   | 0.0    | 0.0    | 1.0   | 0.0  |
| 21UR-51740 | 5874.3 | 328.0 | 3750.5 | 1295.0 | 370.0 | 40.0 |
| 21UR-51750 | 12.0   | 0.0   | 6.0    | 1.0    | 1.0   | 1.0  |
| 21UR-51760 | 0.0    | 0.0   | 0.0    | 0.0    | 12.0  | 0.0  |
| 21UR-51770 | 0.0    | 0.0   | 0.0    | 0.0    | 0.0   | 0.0  |
| 21UR-51780 | 1.0    | 3.0   | 6.0    | 0.0    | 10.0  | 0.0  |
| 21UR-51790 | 11.0   | 1.0   | 10.0   | 7.0    | 3.0   | 0.0  |
| 21UR-5180  | 14.0   | 15.0  | 1.0    | 0.0    | 19.0  | 1.0  |
| 21UR-51800 | 10.0   | 12.0  | 12.0   | 8.0    | 12.0  | 1.0  |
| 21UR-51810 | 0.0    | 0.0   | 0.0    | 0.0    | 4.0   | 0.0  |
| 21UR-51820 | 14.0   | 16.0  | 11.0   | 5.0    | 11.0  | 2.0  |
| 21UR-51830 | 0.0    | 1.0   | 1.0    | 0.0    | 1.0   | 0.0  |
| 21UR-51840 | 0.0    | 0.0   | 0.0    | 0.0    | 0.0   | 0.0  |
| 21UR-51850 | 325.0  | 39.0  | 212.0  | 118.0  | 38.0  | 12.0 |
| 21UR-51860 | 0.0    | 0.0   | 0.0    | 0.0    | 0.0   | 0.0  |
| 21UR-51870 | 0.0    | 0.0   | 0.0    | 0.0    | 0.0   | 0.0  |
| 21UR-51880 | 7.0    | 1.0   | 1.0    | 0.0    | 1.0   | 0.0  |
| 21UR-51890 | 0.0    | 0.0   | 0.0    | 0.0    | 1.0   | 0.0  |
| 21UR-5190  | 0.0    | 0.0   | 0.0    | 0.0    | 0.0   | 0.0  |
| 21UR-51900 | 1.0    | 0.0   | 1.0    | 0.0    | 0.0   | 0.0  |
| 21UR-51910 | 0.0    | 0.0   | 1.0    | 0.0    | 0.0   | 0.0  |
| 21UR-51920 | 7.0    | 3.0   | 7.0    | 4.0    | 4.0   | 1.0  |
| 21UR-51930 | 0.0    | 0.0   | 0.0    | 1.0    | 2.0   | 0.0  |
| 21UR-51940 | 0.0    | 0.0   | 0.0    | 0.0    | 1.0   | 1.0  |
| 21UR-51950 | 272.0  | 184.0 | 283.0  | 182.0  | 169.0 | 31.0 |
| 21UR-51960 | 0.0    | 0.0   | 0.0    | 0.0    | 0.0   | 0.0  |
| 21UR-51970 | 300.0  | 43.0  | 197.0  | 66.0   | 40.0  | 6.0  |
| 21UR-51980 | 1.0    | 0.0   | 0.0    | 0.0    | 1.0   | 0.0  |
| 21UR-51990 | 0.0    | 0.0   | 1.0    | 0.0    | 0.0   | 0.0  |

|            |       |       |       |       |       |      |
|------------|-------|-------|-------|-------|-------|------|
| 21UR-520   | 10.0  | 0.0   | 2.0   | 0.0   | 0.0   | 0.0  |
| 21UR-5200  | 0.0   | 0.0   | 0.0   | 0.0   | 0.0   | 0.0  |
| 21UR-52000 | 1.0   | 6.0   | 0.0   | 0.0   | 4.0   | 0.0  |
| 21UR-52010 | 4.0   | 0.0   | 1.0   | 0.0   | 0.0   | 0.0  |
| 21UR-52020 | 4.0   | 6.0   | 1.0   | 1.0   | 4.0   | 0.0  |
| 21UR-52030 | 0.0   | 0.0   | 1.0   | 0.0   | 0.0   | 0.0  |
| 21UR-52040 | 4.0   | 4.0   | 4.0   | 1.0   | 17.0  | 0.0  |
| 21UR-52050 | 9.0   | 1.0   | 21.0  | 2.0   | 1.0   | 0.0  |
| 21UR-52060 | 6.0   | 4.0   | 0.0   | 0.0   | 3.0   | 0.0  |
| 21UR-52070 | 11.0  | 4.0   | 8.0   | 1.0   | 4.0   | 0.0  |
| 21UR-52080 | 0.0   | 0.0   | 0.0   | 0.0   | 0.0   | 0.0  |
| 21UR-52090 | 8.0   | 0.0   | 1.0   | 0.0   | 2.0   | 0.0  |
| 21UR-5210  | 28.0  | 16.0  | 34.0  | 4.0   | 10.0  | 0.0  |
| 21UR-52100 | 3.0   | 1.0   | 12.0  | 0.0   | 3.0   | 1.0  |
| 21UR-52110 | 6.0   | 0.0   | 6.0   | 0.0   | 4.0   | 0.0  |
| 21UR-52120 | 4.0   | 4.0   | 4.0   | 1.0   | 3.0   | 0.0  |
| 21UR-52130 | 4.0   | 1.0   | 1.0   | 0.0   | 0.0   | 0.0  |
| 21UR-52140 | 25.0  | 17.0  | 25.0  | 12.0  | 11.3  | 0.0  |
| 21UR-52150 | 1.0   | 0.0   | 0.0   | 0.0   | 0.0   | 0.0  |
| 21UR-52160 | 4.0   | 0.0   | 0.0   | 0.0   | 0.0   | 4.0  |
| 21UR-52170 | 1.0   | 0.0   | 1.0   | 0.0   | 0.0   | 0.0  |
| 21UR-52180 | 0.0   | 0.0   | 0.0   | 0.0   | 0.0   | 0.0  |
| 21UR-52190 | 1.0   | 3.0   | 1.0   | 0.0   | 1.0   | 0.0  |
| 21UR-5220  | 0.0   | 0.0   | 0.0   | 0.0   | 0.0   | 0.0  |
| 21UR-52200 | 37.5  | 6.0   | 42.0  | 18.0  | 6.0   | 0.0  |
| 21UR-52210 | 1.0   | 0.0   | 1.0   | 0.0   | 0.0   | 0.0  |
| 21UR-52220 | 0.0   | 1.0   | 1.0   | 0.0   | 4.0   | 0.0  |
| 21UR-52230 | 22.0  | 4.0   | 19.0  | 3.0   | 8.0   | 2.0  |
| 21UR-52240 | 0.0   | 0.3   | 0.0   | 0.0   | 4.0   | 0.0  |
| 21UR-52250 | 0.0   | 0.0   | 0.0   | 0.0   | 0.0   | 0.0  |
| 21UR-52260 | 731.0 | 431.5 | 606.0 | 266.0 | 252.5 | 40.0 |
| 21UR-52270 | 226.0 | 112.0 | 257.0 | 48.0  | 58.0  | 21.0 |
| 21UR-52280 | 150.3 | 26.0  | 113.0 | 12.0  | 22.3  | 2.0  |
| 21UR-52290 | 0.0   | 1.0   | 0.0   | 0.0   | 1.0   | 0.0  |
| 21UR-5230  | 0.0   | 0.0   | 0.0   | 0.0   | 0.0   | 0.0  |
| 21UR-52300 | 22.0  | 4.0   | 8.0   | 0.0   | 6.0   | 0.0  |
| 21UR-52310 | 6.0   | 0.0   | 0.0   | 0.0   | 5.0   | 0.0  |
| 21UR-52320 | 4.0   | 0.0   | 0.0   | 0.0   | 0.0   | 0.0  |
| 21UR-52330 | 47.0  | 30.0  | 37.0  | 7.0   | 28.0  | 2.0  |
| 21UR-52340 | 0.0   | 1.0   | 4.0   | 1.0   | 10.0  | 1.0  |
| 21UR-52350 | 1.0   | 3.0   | 1.0   | 0.0   | 0.0   | 0.0  |
| 21UR-52360 | 70.0  | 16.0  | 58.0  | 22.0  | 27.0  | 4.0  |
| 21UR-52370 | 9.0   | 4.0   | 12.0  | 4.0   | 3.0   | 0.0  |
| 21UR-52380 | 0.0   | 0.0   | 0.0   | 0.0   | 0.0   | 0.0  |
| 21UR-52390 | 7.0   | 1.0   | 5.0   | 0.0   | 1.0   | 3.0  |
| 21UR-5240  | 0.0   | 0.0   | 0.0   | 0.0   | 0.0   | 0.0  |
| 21UR-52400 | 0.0   | 0.0   | 1.0   | 0.0   | 0.0   | 0.0  |
| 21UR-52410 | 1.0   | 2.0   | 0.0   | 0.0   | 0.0   | 0.0  |
| 21UR-52420 | 1.0   | 1.0   | 6.0   | 0.0   | 0.0   | 0.0  |
| 21UR-52430 | 0.0   | 0.0   | 0.0   | 0.0   | 0.0   | 0.0  |
| 21UR-52440 | 0.0   | 0.0   | 0.0   | 0.0   | 0.0   | 0.0  |

|            |      |      |      |      |      |     |
|------------|------|------|------|------|------|-----|
| 21UR-52450 | 0.0  | 0.0  | 0.0  | 0.0  | 0.0  | 0.0 |
| 21UR-52460 | 66.0 | 1.0  | 48.0 | 10.0 | 3.0  | 0.0 |
| 21UR-52470 | 0.0  | 0.0  | 0.0  | 0.0  | 0.0  | 0.0 |
| 21UR-52480 | 20.0 | 3.0  | 19.0 | 4.0  | 1.0  | 1.0 |
| 21UR-52490 | 0.0  | 0.0  | 1.0  | 0.0  | 0.0  | 0.0 |
| 21UR-5250  | 10.0 | 3.0  | 8.0  | 6.0  | 9.0  | 0.0 |
| 21UR-52500 | 0.0  | 0.0  | 0.0  | 0.0  | 0.0  | 0.0 |
| 21UR-52510 | 45.0 | 16.1 | 46.0 | 20.0 | 17.0 | 5.0 |
| 21UR-52520 | 0.0  | 0.0  | 0.0  | 0.0  | 0.0  | 0.0 |
| 21UR-52530 | 0.0  | 0.0  | 0.0  | 0.0  | 1.0  | 0.0 |
| 21UR-52540 | 0.0  | 0.0  | 0.0  | 0.0  | 0.0  | 0.0 |
| 21UR-52550 | 32.0 | 3.0  | 43.0 | 13.0 | 16.0 | 1.0 |
| 21UR-52560 | 0.0  | 0.0  | 0.0  | 0.0  | 0.0  | 0.0 |
| 21UR-52570 | 4.0  | 0.0  | 1.0  | 1.0  | 1.0  | 0.0 |
| 21UR-52580 | 0.0  | 2.0  | 0.0  | 0.0  | 2.0  | 0.0 |
| 21UR-52590 | 0.0  | 0.0  | 0.0  | 0.0  | 1.0  | 0.0 |
| 21UR-5260  | 0.0  | 0.0  | 0.0  | 0.0  | 1.0  | 0.0 |
| 21UR-52600 | 1.0  | 3.0  | 0.0  | 0.0  | 15.0 | 1.0 |
| 21UR-52610 | 0.0  | 0.0  | 0.0  | 0.0  | 0.0  | 0.0 |
| 21UR-52620 | 24.0 | 15.0 | 28.0 | 10.0 | 8.0  | 0.0 |
| 21UR-52630 | 0.0  | 0.0  | 0.0  | 0.0  | 0.0  | 0.0 |
| 21UR-52640 | 1.0  | 0.0  | 0.0  | 0.0  | 0.0  | 0.0 |
| 21UR-52650 | 4.0  | 8.0  | 7.0  | 0.0  | 8.0  | 1.0 |
| 21UR-52660 | 0.0  | 5.0  | 0.0  | 0.0  | 1.0  | 1.0 |
| 21UR-52670 | 0.0  | 0.0  | 0.0  | 0.0  | 0.0  | 0.0 |
| 21UR-52680 | 0.0  | 2.0  | 0.0  | 0.0  | 0.0  | 0.0 |
| 21UR-52690 | 0.0  | 0.0  | 0.0  | 0.0  | 0.0  | 0.0 |
| 21UR-5270  | 10.0 | 0.0  | 4.0  | 0.0  | 0.0  | 0.0 |
| 21UR-52700 | 12.0 | 9.1  | 14.0 | 0.0  | 41.0 | 1.0 |
| 21UR-52710 | 17.0 | 0.0  | 12.0 | 5.0  | 10.0 | 0.0 |
| 21UR-52730 | 2.0  | 11.0 | 4.0  | 1.0  | 14.0 | 4.0 |
| 21UR-52740 | 2.0  | 0.5  | 1.0  | 0.0  | 1.0  | 0.0 |
| 21UR-52750 | 0.0  | 4.0  | 0.0  | 0.0  | 0.0  | 0.0 |
| 21UR-52760 | 0.0  | 0.0  | 0.0  | 0.0  | 0.0  | 0.0 |
| 21UR-52770 | 0.0  | 0.0  | 0.0  | 0.0  | 0.0  | 0.0 |
| 21UR-52780 | 30.0 | 23.0 | 36.0 | 13.0 | 44.0 | 1.0 |
| 21UR-52790 | 3.0  | 6.0  | 1.0  | 1.0  | 2.0  | 1.0 |
| 21UR-5280  | 14.0 | 5.0  | 7.0  | 2.0  | 1.0  | 0.0 |
| 21UR-52800 | 1.0  | 0.0  | 1.0  | 0.0  | 0.0  | 0.0 |
| 21UR-52810 | 1.0  | 0.3  | 0.0  | 0.0  | 0.0  | 0.0 |
| 21UR-52820 | 43.0 | 1.0  | 47.0 | 23.0 | 4.0  | 1.0 |
| 21UR-52830 | 0.0  | 1.3  | 5.0  | 0.0  | 0.0  | 0.0 |
| 21UR-52840 | 1.0  | 1.0  | 0.0  | 0.0  | 1.0  | 0.0 |
| 21UR-52850 | 0.0  | 0.0  | 0.0  | 0.0  | 0.0  | 0.0 |
| 21UR-52860 | 3.0  | 3.0  | 0.0  | 1.0  | 0.0  | 0.0 |
| 21UR-52870 | 0.0  | 0.0  | 0.0  | 0.0  | 1.0  | 0.0 |
| 21UR-52880 | 8.0  | 6.0  | 24.0 | 4.0  | 11.0 | 1.0 |
| 21UR-52890 | 0.0  | 1.0  | 1.0  | 0.0  | 6.0  | 0.0 |
| 21UR-5290  | 0.0  | 0.0  | 1.0  | 0.0  | 4.0  | 0.0 |
| 21UR-52900 | 15.0 | 0.0  | 10.0 | 1.0  | 1.0  | 0.0 |
| 21UR-52910 | 8.0  | 1.0  | 6.0  | 1.0  | 0.0  | 1.0 |

|            |       |      |       |       |      |     |
|------------|-------|------|-------|-------|------|-----|
| 21UR-52920 | 0.0   | 0.0  | 0.0   | 0.0   | 0.0  | 0.0 |
| 21UR-52930 | 0.0   | 0.0  | 0.0   | 0.0   | 1.0  | 0.0 |
| 21UR-52940 | 0.0   | 0.0  | 0.0   | 0.0   | 0.0  | 0.0 |
| 21UR-52950 | 10.0  | 0.0  | 1.0   | 6.0   | 19.0 | 1.0 |
| 21UR-52960 | 0.0   | 0.3  | 0.0   | 0.0   | 0.0  | 0.0 |
| 21UR-52970 | 12.0  | 9.0  | 20.0  | 8.0   | 18.0 | 1.0 |
| 21UR-52980 | 1.0   | 0.0  | 0.0   | 0.0   | 0.0  | 0.0 |
| 21UR-52990 | 0.0   | 0.0  | 0.0   | 0.0   | 0.0  | 0.0 |
| 21UR-530   | 0.0   | 0.0  | 0.0   | 0.0   | 0.0  | 0.0 |
| 21UR-5300  | 0.0   | 0.0  | 0.0   | 0.0   | 0.0  | 0.0 |
| 21UR-53000 | 0.0   | 0.0  | 0.0   | 0.0   | 0.0  | 0.0 |
| 21UR-53010 | 0.0   | 1.0  | 0.0   | 0.0   | 6.0  | 0.0 |
| 21UR-53020 | 0.0   | 0.0  | 0.0   | 0.0   | 0.0  | 0.0 |
| 21UR-53030 | 0.0   | 0.0  | 0.0   | 1.0   | 0.0  | 0.0 |
| 21UR-53040 | 87.0  | 26.0 | 54.0  | 19.0  | 18.0 | 1.0 |
| 21UR-53050 | 77.0  | 3.0  | 63.0  | 27.0  | 12.0 | 1.0 |
| 21UR-53060 | 0.0   | 0.0  | 0.0   | 0.0   | 0.0  | 1.0 |
| 21UR-53070 | 34.0  | 33.0 | 52.0  | 13.0  | 27.0 | 8.0 |
| 21UR-53080 | 0.0   | 0.0  | 0.0   | 0.0   | 0.0  | 0.0 |
| 21UR-53090 | 0.0   | 1.0  | 0.0   | 0.0   | 0.0  | 0.0 |
| 21UR-5310  | 26.0  | 22.0 | 25.0  | 14.0  | 24.7 | 0.0 |
| 21UR-53100 | 0.0   | 0.0  | 0.0   | 0.0   | 0.0  | 0.0 |
| 21UR-53110 | 16.0  | 8.0  | 33.0  | 6.0   | 14.0 | 6.0 |
| 21UR-53120 | 1.0   | 1.7  | 4.0   | 1.0   | 1.0  | 0.0 |
| 21UR-53130 | 0.0   | 1.0  | 0.0   | 0.0   | 4.0  | 0.0 |
| 21UR-53140 | 1.0   | 0.0  | 1.0   | 1.0   | 5.0  | 0.0 |
| 21UR-53150 | 0.0   | 0.0  | 0.0   | 0.0   | 0.0  | 0.0 |
| 21UR-53160 | 52.0  | 50.6 | 57.0  | 45.0  | 32.0 | 8.0 |
| 21UR-53170 | 0.0   | 0.0  | 0.0   | 0.0   | 0.0  | 0.0 |
| 21UR-53180 | 0.0   | 0.0  | 0.0   | 0.0   | 0.1  | 0.0 |
| 21UR-53190 | 10.0  | 5.0  | 12.7  | 10.0  | 9.5  | 0.0 |
| 21UR-5320  | 0.0   | 0.0  | 0.0   | 0.0   | 0.0  | 0.0 |
| 21UR-53200 | 305.5 | 4.0  | 427.0 | 112.0 | 47.0 | 0.0 |
| 21UR-53210 | 6.0   | 7.0  | 8.0   | 1.0   | 13.0 | 7.0 |
| 21UR-53220 | 36.0  | 0.0  | 22.0  | 6.0   | 4.0  | 0.0 |
| 21UR-53230 | 1.0   | 0.0  | 3.0   | 1.0   | 0.0  | 0.0 |
| 21UR-53240 | 1.0   | 0.0  | 1.0   | 0.0   | 0.0  | 0.0 |
| 21UR-53250 | 0.0   | 0.0  | 0.0   | 0.0   | 0.0  | 0.0 |
| 21UR-53260 | 6.0   | 1.0  | 10.0  | 1.0   | 0.0  | 0.0 |
| 21UR-53270 | 0.0   | 0.0  | 0.0   | 0.0   | 0.0  | 0.0 |
| 21UR-53280 | 1.0   | 5.0  | 1.0   | 0.0   | 1.0  | 1.0 |
| 21UR-53290 | 338.7 | 24.0 | 302.3 | 116.0 | 27.0 | 9.0 |
| 21UR-5330  | 4.0   | 1.0  | 4.0   | 1.0   | 1.0  | 0.0 |
| 21UR-53300 | 0.0   | 0.0  | 1.0   | 0.0   | 1.0  | 0.0 |
| 21UR-53310 | 8.0   | 2.0  | 18.0  | 0.0   | 1.0  | 0.0 |
| 21UR-53320 | 0.0   | 0.0  | 0.0   | 0.0   | 0.0  | 0.0 |
| 21UR-53330 | 0.0   | 0.0  | 0.0   | 0.0   | 0.0  | 0.0 |
| 21UR-53340 | 36.0  | 8.0  | 36.0  | 8.0   | 4.7  | 1.0 |
| 21UR-53350 | 10.0  | 4.0  | 12.0  | 0.0   | 6.0  | 0.0 |
| 21UR-53360 | 0.0   | 0.0  | 0.0   | 0.0   | 0.0  | 0.0 |
| 21UR-53370 | 43.5  | 3.0  | 23.0  | 8.0   | 2.0  | 0.0 |

|            |        |       |        |        |       |      |
|------------|--------|-------|--------|--------|-------|------|
| 21UR-53380 | 1712.0 | 398.0 | 1846.0 | 827.0  | 578.5 | 33.0 |
| 21UR-53390 | 0.0    | 1.0   | 0.0    | 0.0    | 0.0   | 0.0  |
| 21UR-5340  | 6.0    | 0.0   | 8.0    | 0.0    | 4.0   | 0.0  |
| 21UR-53400 | 0.0    | 0.0   | 0.0    | 0.0    | 0.0   | 0.0  |
| 21UR-53410 | 0.0    | 8.0   | 0.0    | 0.0    | 6.0   | 0.0  |
| 21UR-53420 | 4939.2 | 690.0 | 4217.0 | 1849.7 | 668.0 | 38.0 |
| 21UR-53430 | 1.0    | 0.0   | 0.0    | 0.0    | 0.0   | 0.0  |
| 21UR-53440 | 22.0   | 1.0   | 20.0   | 6.0    | 1.0   | 0.0  |
| 21UR-53450 | 4.0    | 13.0  | 4.0    | 1.0    | 33.0  | 1.0  |
| 21UR-53460 | 1.0    | 0.0   | 1.0    | 1.0    | 0.8   | 0.0  |
| 21UR-53470 | 0.0    | 0.0   | 0.0    | 0.0    | 0.0   | 0.0  |
| 21UR-53480 | 258.0  | 156.0 | 205.5  | 91.0   | 151.5 | 21.0 |
| 21UR-53490 | 1.0    | 0.0   | 0.0    | 0.0    | 1.0   | 0.0  |
| 21UR-5350  | 0.0    | 0.0   | 0.0    | 0.0    | 0.0   | 0.0  |
| 21UR-53500 | 361.0  | 21.0  | 297.5  | 219.0  | 65.0  | 3.0  |
| 21UR-53510 | 0.0    | 0.0   | 0.0    | 0.0    | 12.0  | 0.0  |
| 21UR-53520 | 0.0    | 0.0   | 0.0    | 0.0    | 0.0   | 0.0  |
| 21UR-53530 | 1.0    | 4.0   | 5.0    | 4.0    | 4.0   | 0.0  |
| 21UR-53540 | 0.0    | 0.0   | 0.0    | 0.0    | 0.0   | 0.0  |
| 21UR-53550 | 1.0    | 2.0   | 0.0    | 0.0    | 4.0   | 1.0  |
| 21UR-53560 | 3.0    | 1.0   | 4.0    | 1.0    | 4.0   | 2.0  |
| 21UR-53570 | 2080.3 | 186.0 | 1726.6 | 699.3  | 432.6 | 11.0 |
| 21UR-53580 | 10.0   | 15.0  | 8.0    | 1.0    | 23.0  | 9.0  |
| 21UR-53590 | 1.0    | 0.0   | 0.0    | 0.0    | 4.0   | 0.0  |
| 21UR-5360  | 0.0    | 0.0   | 0.0    | 0.0    | 0.0   | 0.0  |
| 21UR-53610 | 0.0    | 1.0   | 1.0    | 0.0    | 0.0   | 0.0  |
| 21UR-53620 | 52.0   | 24.0  | 52.0   | 11.0   | 20.0  | 3.0  |
| 21UR-53630 | 9.0    | 10.0  | 14.0   | 4.0    | 1.0   | 1.5  |
| 21UR-53640 | 1.0    | 16.7  | 0.0    | 5.0    | 26.0  | 4.0  |
| 21UR-53650 | 1.0    | 0.0   | 0.0    | 0.0    | 0.0   | 0.0  |
| 21UR-53660 | 0.0    | 2.0   | 2.0    | 0.0    | 2.0   | 1.0  |
| 21UR-53670 | 0.0    | 13.0  | 0.0    | 0.0    | 2.0   | 0.0  |
| 21UR-53680 | 0.0    | 4.0   | 0.0    | 0.0    | 0.0   | 0.0  |
| 21UR-53690 | 0.0    | 1.0   | 1.0    | 0.0    | 0.0   | 0.0  |
| 21UR-5370  | 1.0    | 0.0   | 8.0    | 1.0    | 3.0   | 1.0  |
| 21UR-53700 | 1.0    | 1.0   | 1.0    | 0.0    | 0.0   | 0.0  |
| 21UR-53710 | 0.0    | 0.0   | 0.0    | 0.0    | 0.0   | 0.0  |
| 21UR-53720 | 0.0    | 1.0   | 0.0    | 0.0    | 0.0   | 0.0  |
| 21UR-53730 | 0.0    | 0.0   | 0.0    | 0.0    | 0.0   | 0.0  |
| 21UR-53740 | 8.0    | 1.0   | 9.0    | 1.0    | 1.0   | 1.0  |
| 21UR-53750 | 4.0    | 0.0   | 1.0    | 0.0    | 0.0   | 0.0  |
| 21UR-53760 | 0.0    | 0.0   | 0.0    | 0.0    | 0.0   | 0.0  |
| 21UR-53770 | 0.0    | 0.0   | 1.0    | 1.0    | 0.0   | 0.0  |
| 21UR-53780 | 0.0    | 1.0   | 1.0    | 0.0    | 0.0   | 3.0  |
| 21UR-53790 | 0.0    | 0.0   | 1.0    | 0.0    | 0.0   | 0.0  |
| 21UR-5380  | 290.0  | 5.0   | 272.0  | 97.0   | 9.0   | 0.0  |
| 21UR-53800 | 4.0    | 11.0  | 5.0    | 4.0    | 11.0  | 5.0  |
| 21UR-53810 | 5.0    | 2.0   | 1.0    | 1.0    | 5.0   | 0.0  |
| 21UR-53820 | 0.0    | 0.0   | 0.0    | 0.0    | 0.0   | 0.0  |
| 21UR-53830 | 0.0    | 0.0   | 0.0    | 0.0    | 0.0   | 0.0  |
| 21UR-53840 | 167.8  | 98.6  | 147.6  | 25.0   | 120.8 | 5.0  |

|            |       |       |       |       |       |       |
|------------|-------|-------|-------|-------|-------|-------|
| 21UR-53850 | 203.0 | 30.0  | 265.0 | 38.0  | 71.0  | 8.0   |
| 21UR-53860 | 0.0   | 0.1   | 0.0   | 0.0   | 3.0   | 0.0   |
| 21UR-53870 | 27.0  | 14.0  | 31.0  | 9.0   | 20.0  | 3.0   |
| 21UR-53880 | 4.0   | 1.0   | 6.0   | 0.0   | 3.0   | 0.0   |
| 21UR-53890 | 31.0  | 4.0   | 46.0  | 8.0   | 9.0   | 0.0   |
| 21UR-5390  | 0.0   | 0.0   | 0.0   | 0.0   | 0.0   | 0.0   |
| 21UR-53900 | 0.0   | 0.0   | 0.0   | 1.0   | 21.0  | 0.0   |
| 21UR-53910 | 23.0  | 6.0   | 17.0  | 1.0   | 11.0  | 2.0   |
| 21UR-53930 | 0.0   | 0.0   | 0.0   | 0.0   | 0.1   | 0.0   |
| 21UR-53940 | 2.0   | 0.0   | 1.0   | 1.0   | 4.0   | 0.0   |
| 21UR-53950 | 4.0   | 1.0   | 0.0   | 0.0   | 1.0   | 0.0   |
| 21UR-53960 | 0.0   | 0.0   | 0.0   | 0.0   | 0.0   | 0.0   |
| 21UR-53970 | 1.0   | 0.0   | 0.0   | 0.0   | 0.0   | 0.0   |
| 21UR-53980 | 4.0   | 1.0   | 5.0   | 2.0   | 0.0   | 0.0   |
| 21UR-53990 | 3.0   | 0.0   | 3.0   | 1.0   | 1.0   | 0.0   |
| 21UR-540   | 20.0  | 15.0  | 20.0  | 7.0   | 14.0  | 0.0   |
| 21UR-5400  | 0.0   | 0.0   | 0.0   | 0.0   | 0.0   | 0.0   |
| 21UR-54010 | 6.0   | 2.0   | 0.0   | 0.0   | 0.0   | 0.0   |
| 21UR-54020 | 4.0   | 0.0   | 14.0  | 0.0   | 4.7   | 0.0   |
| 21UR-54030 | 0.0   | 2.0   | 0.0   | 0.0   | 4.0   | 1.0   |
| 21UR-54040 | 16.0  | 1.0   | 17.0  | 8.0   | 2.0   | 0.0   |
| 21UR-54050 | 4.0   | 1.0   | 1.0   | 0.0   | 1.0   | 0.0   |
| 21UR-54060 | 0.0   | 0.0   | 0.0   | 0.0   | 0.0   | 0.0   |
| 21UR-54070 | 0.0   | 0.0   | 0.0   | 0.0   | 0.0   | 0.0   |
| 21UR-54080 | 20.0  | 2.0   | 6.0   | 15.0  | 9.0   | 1.0   |
| 21UR-54090 | 4.0   | 13.0  | 9.0   | 4.0   | 18.0  | 5.0   |
| 21UR-5410  | 1.0   | 0.0   | 0.0   | 0.0   | 0.0   | 0.0   |
| 21UR-54100 | 777.0 | 373.0 | 792.0 | 324.0 | 414.0 | 26.0  |
| 21UR-54110 | 0.0   | 0.0   | 0.0   | 0.0   | 0.0   | 0.0   |
| 21UR-54120 | 4.0   | 0.0   | 6.0   | 0.0   | 0.0   | 0.0   |
| 21UR-54130 | 68.0  | 5.0   | 50.0  | 10.8  | 1.0   | 0.0   |
| 21UR-54140 | 0.0   | 0.0   | 0.0   | 0.0   | 0.0   | 0.0   |
| 21UR-54150 | 0.0   | 0.0   | 0.0   | 0.0   | 0.0   | 0.0   |
| 21UR-54160 | 14.0  | 22.0  | 34.0  | 11.0  | 44.5  | 4.0   |
| 21UR-54180 | 0.0   | 0.0   | 0.0   | 0.0   | 0.0   | 0.0   |
| 21UR-54190 | 0.0   | 4.0   | 0.0   | 1.0   | 0.0   | 1.0   |
| 21UR-5420  | 0.0   | 0.0   | 0.0   | 0.0   | 0.0   | 0.0   |
| 21UR-54200 | 0.0   | 0.0   | 0.0   | 0.0   | 0.0   | 0.0   |
| 21UR-54210 | 0.0   | 0.0   | 0.0   | 0.0   | 0.0   | 0.0   |
| 21UR-54220 | 0.0   | 0.0   | 0.0   | 0.0   | 0.0   | 0.0   |
| 21UR-54230 | 0.0   | 0.0   | 0.0   | 0.0   | 0.0   | 0.0   |
| 21UR-54240 | 4.0   | 0.0   | 1.0   | 1.0   | 1.0   | 0.0   |
| 21UR-54250 | 4.0   | 6.0   | 11.0  | 9.0   | 2.0   | 0.0   |
| 21UR-54260 | 198.0 | 45.0  | 205.0 | 68.0  | 43.0  | 6.0   |
| 21UR-54270 | 6.0   | 3.0   | 10.0  | 1.0   | 2.0   | 0.0   |
| 21UR-5430  | 0.0   | 1.0   | 0.0   | 0.0   | 1.0   | 0.0   |
| 21UR-54300 | 25.0  | 0.0   | 12.0  | 6.0   | 5.0   | 0.0   |
| 21UR-54310 | 0.0   | 6.0   | 1.0   | 0.0   | 4.0   | 3.0   |
| 21UR-54320 | 486.0 | 622.0 | 625.0 | 174.0 | 576.0 | 120.0 |
| 21UR-54330 | 4.0   | 1.0   | 4.0   | 0.0   | 1.0   | 0.0   |
| 21UR-54340 | 0.0   | 0.0   | 0.0   | 0.0   | 0.0   | 0.0   |



|            |        |       |       |       |       |      |
|------------|--------|-------|-------|-------|-------|------|
| 21UR-54350 | 16.0   | 0.0   | 10.0  | 4.0   | 0.0   | 0.0  |
| 21UR-54360 | 5.0    | 24.0  | 4.0   | 0.0   | 18.0  | 4.0  |
| 21UR-54370 | 508.0  | 277.0 | 337.0 | 124.0 | 116.0 | 29.0 |
| 21UR-54380 | 34.0   | 10.0  | 16.0  | 12.0  | 3.0   | 0.0  |
| 21UR-54390 | 0.0    | 0.0   | 0.0   | 0.0   | 0.0   | 0.0  |
| 21UR-5440  | 1.0    | 4.1   | 1.0   | 0.0   | 0.0   | 0.0  |
| 21UR-54400 | 0.0    | 0.0   | 0.0   | 0.0   | 0.0   | 0.0  |
| 21UR-54410 | 0.0    | 0.0   | 4.0   | 0.0   | 0.0   | 0.0  |
| 21UR-54420 | 1.0    | 0.0   | 1.0   | 0.0   | 0.0   | 0.0  |
| 21UR-54430 | 1.0    | 1.1   | 5.0   | 0.0   | 9.0   | 1.0  |
| 21UR-54440 | 5.0    | 8.0   | 7.0   | 1.0   | 13.0  | 0.0  |
| 21UR-54450 | 0.0    | 0.0   | 2.0   | 0.0   | 0.0   | 0.0  |
| 21UR-54460 | 9.0    | 3.0   | 20.0  | 1.0   | 5.0   | 0.0  |
| 21UR-54470 | 0.0    | 0.0   | 0.0   | 0.0   | 1.0   | 0.0  |
| 21UR-54480 | 0.0    | 0.0   | 0.0   | 0.0   | 0.0   | 0.0  |
| 21UR-54490 | 19.0   | 31.0  | 18.0  | 5.0   | 44.7  | 2.0  |
| 21UR-5450  | 8.0    | 1.0   | 0.0   | 0.0   | 0.0   | 0.0  |
| 21UR-54500 | 638.0  | 223.0 | 535.0 | 260.0 | 402.0 | 25.0 |
| 21UR-54510 | 0.0    | 0.0   | 0.0   | 0.0   | 0.0   | 0.0  |
| 21UR-54520 | 2.0    | 0.0   | 1.0   | 1.0   | 0.0   | 0.0  |
| 21UR-54530 | 8.0    | 1.0   | 4.0   | 3.0   | 0.0   | 0.0  |
| 21UR-54540 | 21.0   | 4.0   | 14.0  | 10.0  | 9.0   | 4.0  |
| 21UR-54550 | 12.0   | 7.0   | 6.0   | 6.7   | 0.0   | 0.0  |
| 21UR-54560 | 4.0    | 0.0   | 1.0   | 0.0   | 0.0   | 0.0  |
| 21UR-54570 | 24.0   | 13.0  | 20.0  | 4.5   | 12.0  | 0.0  |
| 21UR-54580 | 4.0    | 8.0   | 4.0   | 3.0   | 11.0  | 0.0  |
| 21UR-54590 | 1.0    | 1.0   | 0.0   | 0.0   | 0.0   | 0.0  |
| 21UR-5460  | 0.0    | 0.0   | 0.0   | 0.0   | 0.0   | 0.0  |
| 21UR-54600 | 0.0    | 0.0   | 0.0   | 0.0   | 0.0   | 0.0  |
| 21UR-54610 | 0.0    | 0.0   | 0.0   | 0.0   | 0.0   | 0.0  |
| 21UR-54620 | 48.0   | 110.0 | 40.0  | 18.0  | 122.4 | 18.0 |
| 21UR-54630 | 0.0    | 0.0   | 0.0   | 0.0   | 0.0   | 0.0  |
| 21UR-54640 | 148.0  | 183.7 | 114.0 | 63.0  | 257.3 | 15.0 |
| 21UR-54650 | 0.0    | 0.0   | 0.0   | 0.0   | 0.0   | 0.0  |
| 21UR-54660 | 0.0    | 0.0   | 1.0   | 0.0   | 1.1   | 0.0  |
| 21UR-54670 | 0.0    | 0.0   | 0.0   | 0.0   | 0.0   | 0.0  |
| 21UR-54680 | 0.0    | 0.0   | 0.0   | 0.0   | 0.0   | 0.0  |
| 21UR-54690 | 0.0    | 0.0   | 0.0   | 0.0   | 0.0   | 0.0  |
| 21UR-5470  | 1.0    | 0.0   | 1.0   | 0.0   | 0.0   | 0.0  |
| 21UR-54700 | 1.0    | 1.0   | 0.0   | 0.0   | 0.0   | 0.0  |
| 21UR-54710 | 0.0    | 0.0   | 0.0   | 0.0   | 0.0   | 0.0  |
| 21UR-54720 | 1.0    | 0.0   | 0.0   | 0.0   | 0.0   | 0.0  |
| 21UR-54730 | 0.0    | 1.0   | 0.0   | 0.0   | 0.0   | 0.0  |
| 21UR-54740 | 0.0    | 0.0   | 0.0   | 0.0   | 0.0   | 0.0  |
| 21UR-54750 | 0.0    | 1.0   | 0.0   | 0.0   | 0.0   | 0.0  |
| 21UR-54760 | 0.0    | 1.0   | 0.0   | 0.0   | 0.0   | 0.0  |
| 21UR-54770 | 1.0    | 2.0   | 4.0   | 0.0   | 0.0   | 0.0  |
| 21UR-54780 | 0.0    | 0.0   | 0.0   | 0.0   | 0.0   | 0.0  |
| 21UR-54790 | 0.0    | 0.0   | 0.0   | 0.0   | 0.0   | 0.0  |
| 21UR-5480  | 1330.8 | 83.3  | 921.0 | 472.0 | 114.0 | 15.0 |
| 21UR-54800 | 0.0    | 0.0   | 0.0   | 0.0   | 0.0   | 0.0  |

|            |        |       |        |       |       |      |
|------------|--------|-------|--------|-------|-------|------|
| 21UR-54810 | 0.0    | 1.0   | 0.0    | 0.0   | 1.0   | 0.0  |
| 21UR-54820 | 0.0    | 0.0   | 1.0    | 0.0   | 4.0   | 0.0  |
| 21UR-54830 | 0.0    | 0.0   | 0.0    | 0.0   | 0.0   | 0.0  |
| 21UR-54840 | 8.0    | 4.0   | 9.0    | 0.0   | 5.0   | 0.0  |
| 21UR-54850 | 1.0    | 0.0   | 1.0    | 0.0   | 1.0   | 0.0  |
| 21UR-54870 | 0.0    | 0.0   | 0.0    | 0.0   | 1.0   | 0.0  |
| 21UR-54880 | 8.0    | 0.0   | 12.0   | 0.0   | 6.0   | 0.0  |
| 21UR-54890 | 3.0    | 0.0   | 2.0    | 1.0   | 2.0   | 0.0  |
| 21UR-5490  | 0.0    | 0.0   | 0.0    | 0.0   | 0.0   | 0.0  |
| 21UR-54900 | 0.0    | 0.0   | 0.0    | 0.0   | 0.0   | 0.0  |
| 21UR-54910 | 62.5   | 81.0  | 48.0   | 18.0  | 158.0 | 0.0  |
| 21UR-54920 | 89.0   | 10.1  | 63.0   | 68.0  | 42.0  | 6.0  |
| 21UR-54930 | 6.0    | 17.0  | 12.0   | 7.0   | 15.0  | 1.1  |
| 21UR-54940 | 18.0   | 8.0   | 9.0    | 6.0   | 3.0   | 0.0  |
| 21UR-54950 | 8.0    | 3.0   | 6.0    | 0.0   | 1.0   | 0.0  |
| 21UR-54960 | 0.0    | 0.0   | 0.0    | 0.0   | 0.0   | 0.0  |
| 21UR-54970 | 19.0   | 5.0   | 14.0   | 3.0   | 10.0  | 0.0  |
| 21UR-54980 | 0.0    | 0.0   | 1.0    | 0.0   | 4.0   | 0.0  |
| 21UR-54990 | 0.0    | 1.0   | 0.0    | 0.0   | 3.0   | 0.0  |
| 21UR-550   | 0.0    | 6.0   | 0.0    | 0.0   | 2.0   | 1.0  |
| 21UR-5500  | 0.0    | 0.0   | 6.0    | 0.0   | 0.0   | 1.0  |
| 21UR-55000 | 0.0    | 0.0   | 0.0    | 0.0   | 0.0   | 0.0  |
| 21UR-55010 | 0.0    | 0.0   | 0.0    | 0.0   | 0.0   | 0.0  |
| 21UR-55020 | 0.0    | 1.0   | 0.0    | 0.0   | 0.0   | 0.0  |
| 21UR-55030 | 1565.0 | 186.0 | 1263.5 | 538.5 | 73.0  | 24.0 |
| 21UR-55040 | 303.0  | 312.0 | 154.0  | 143.0 | 153.0 | 25.0 |
| 21UR-55050 | 1.0    | 4.0   | 0.0    | 0.0   | 3.0   | 0.0  |
| 21UR-55060 | 0.0    | 0.1   | 0.0    | 0.0   | 0.0   | 0.0  |
| 21UR-55070 | 23.0   | 2.0   | 16.0   | 3.0   | 2.0   | 0.0  |
| 21UR-55080 | 0.0    | 0.0   | 0.0    | 0.0   | 0.0   | 0.0  |
| 21UR-55090 | 0.0    | 0.0   | 0.0    | 0.0   | 0.0   | 0.0  |
| 21UR-5510  | 48.0   | 8.0   | 30.0   | 25.0  | 2.0   | 0.0  |
| 21UR-55100 | 0.0    | 0.0   | 0.0    | 0.0   | 0.0   | 0.0  |
| 21UR-55110 | 7.0    | 10.0  | 7.0    | 3.0   | 19.0  | 1.0  |
| 21UR-55120 | 5.0    | 1.0   | 2.0    | 1.0   | 3.0   | 0.0  |
| 21UR-55130 | 305.0  | 146.8 | 233.0  | 166.0 | 246.0 | 4.0  |
| 21UR-55140 | 0.0    | 0.0   | 0.0    | 0.0   | 0.0   | 0.0  |
| 21UR-55150 | 45.0   | 14.0  | 30.0   | 21.0  | 6.0   | 2.0  |
| 21UR-55160 | 6.0    | 10.0  | 6.0    | 4.0   | 7.0   | 0.0  |
| 21UR-55170 | 0.0    | 0.0   | 0.0    | 0.0   | 0.0   | 0.0  |
| 21UR-55180 | 0.0    | 0.0   | 0.0    | 0.0   | 0.0   | 0.0  |
| 21UR-55190 | 0.0    | 0.0   | 0.0    | 0.0   | 0.0   | 0.0  |
| 21UR-5520  | 587.7  | 21.0  | 265.0  | 136.0 | 15.0  | 1.0  |
| 21UR-55200 | 0.0    | 0.0   | 0.0    | 0.0   | 0.0   | 0.0  |
| 21UR-55210 | 13.0   | 6.1   | 25.5   | 14.0  | 12.0  | 0.0  |
| 21UR-55220 | 1.0    | 1.0   | 1.0    | 0.0   | 0.0   | 0.0  |
| 21UR-55230 | 1.0    | 4.0   | 2.0    | 4.0   | 0.0   | 0.0  |
| 21UR-55240 | 21.0   | 20.0  | 12.0   | 9.0   | 18.0  | 0.0  |
| 21UR-55250 | 342.0  | 87.0  | 537.5  | 286.8 | 65.0  | 11.0 |
| 21UR-55270 | 222.0  | 39.2  | 191.0  | 102.5 | 47.0  | 1.0  |
| 21UR-55280 | 0.0    | 0.0   | 0.0    | 0.0   | 0.0   | 0.0  |

|            |       |       |       |       |       |      |
|------------|-------|-------|-------|-------|-------|------|
| 21UR-55290 | 0.0   | 0.0   | 0.0   | 0.0   | 0.0   | 0.0  |
| 21UR-5530  | 22.0  | 5.0   | 26.0  | 4.0   | 16.0  | 0.0  |
| 21UR-55300 | 6.0   | 0.0   | 1.0   | 1.0   | 0.0   | 0.0  |
| 21UR-55310 | 0.0   | 1.0   | 0.0   | 1.0   | 0.0   | 0.0  |
| 21UR-55320 | 8.0   | 3.0   | 8.0   | 0.0   | 2.0   | 0.0  |
| 21UR-55330 | 0.0   | 0.0   | 0.0   | 0.0   | 0.0   | 0.0  |
| 21UR-55340 | 0.0   | 0.0   | 0.0   | 0.0   | 0.0   | 0.0  |
| 21UR-55350 | 1.0   | 6.0   | 4.0   | 1.0   | 1.0   | 1.0  |
| 21UR-55360 | 0.0   | 0.0   | 0.0   | 0.0   | 0.0   | 0.0  |
| 21UR-55370 | 0.0   | 2.0   | 0.0   | 0.0   | 0.0   | 0.0  |
| 21UR-55380 | 0.0   | 0.0   | 0.0   | 0.0   | 0.0   | 0.0  |
| 21UR-55390 | 3.0   | 3.0   | 0.0   | 1.0   | 0.0   | 0.0  |
| 21UR-5540  | 62.0  | 14.0  | 40.0  | 25.0  | 6.0   | 2.0  |
| 21UR-55400 | 0.0   | 0.0   | 0.0   | 0.0   | 0.0   | 0.0  |
| 21UR-55410 | 4.0   | 3.0   | 4.0   | 6.0   | 7.0   | 1.0  |
| 21UR-55430 | 832.5 | 120.5 | 676.5 | 349.0 | 222.0 | 36.0 |
| 21UR-55440 | 1.0   | 1.0   | 0.0   | 0.0   | 1.0   | 1.0  |
| 21UR-55450 | 0.0   | 0.0   | 0.0   | 0.0   | 0.0   | 0.0  |
| 21UR-55460 | 8.0   | 10.5  | 9.0   | 1.0   | 2.0   | 0.0  |
| 21UR-55470 | 0.0   | 0.0   | 0.0   | 0.0   | 0.0   | 0.0  |
| 21UR-55490 | 20.0  | 1.0   | 15.0  | 3.0   | 8.8   | 0.0  |
| 21UR-5550  | 0.0   | 0.0   | 0.0   | 0.0   | 0.0   | 0.0  |
| 21UR-55500 | 552.0 | 119.5 | 387.0 | 254.0 | 195.5 | 15.0 |
| 21UR-55510 | 1.0   | 1.0   | 1.0   | 0.0   | 0.0   | 1.0  |
| 21UR-55520 | 14.0  | 5.0   | 14.0  | 4.0   | 1.0   | 2.0  |
| 21UR-55530 | 0.0   | 0.0   | 0.0   | 0.0   | 0.0   | 0.0  |
| 21UR-55540 | 25.0  | 6.0   | 30.0  | 7.0   | 1.0   | 0.0  |
| 21UR-55550 | 2.0   | 0.0   | 2.0   | 1.0   | 4.0   | 0.0  |
| 21UR-55560 | 6.0   | 18.0  | 20.0  | 8.0   | 45.0  | 5.0  |
| 21UR-55570 | 18.0  | 0.0   | 10.0  | 1.0   | 2.0   | 0.0  |
| 21UR-55580 | 4.0   | 0.0   | 0.0   | 0.0   | 1.0   | 0.0  |
| 21UR-55590 | 4.0   | 0.0   | 8.0   | 0.0   | 0.0   | 0.0  |
| 21UR-5560  | 35.0  | 3.0   | 27.0  | 4.0   | 14.0  | 0.0  |
| 21UR-55600 | 1.0   | 7.1   | 1.0   | 0.0   | 3.0   | 0.0  |
| 21UR-55610 | 0.0   | 0.0   | 0.0   | 0.0   | 0.5   | 0.0  |
| 21UR-55620 | 0.0   | 0.0   | 0.0   | 0.0   | 0.0   | 0.0  |
| 21UR-55630 | 0.0   | 0.0   | 1.0   | 0.0   | 0.0   | 0.0  |
| 21UR-55650 | 22.0  | 0.0   | 24.0  | 9.0   | 0.0   | 0.0  |
| 21UR-55660 | 0.0   | 1.0   | 0.0   | 0.0   | 0.0   | 0.0  |
| 21UR-55670 | 14.0  | 15.0  | 16.0  | 0.0   | 47.0  | 4.0  |
| 21UR-55680 | 37.0  | 12.0  | 31.0  | 8.0   | 13.0  | 1.0  |
| 21UR-55690 | 6.0   | 6.0   | 8.0   | 1.0   | 4.0   | 3.0  |
| 21UR-5570  | 1.0   | 0.0   | 1.0   | 0.0   | 0.0   | 0.0  |
| 21UR-55700 | 0.0   | 0.0   | 0.0   | 0.0   | 0.0   | 0.0  |
| 21UR-55710 | 3.0   | 0.0   | 10.0  | 0.0   | 0.0   | 0.0  |
| 21UR-55720 | 0.0   | 0.0   | 0.0   | 0.0   | 2.1   | 0.0  |
| 21UR-55730 | 1.0   | 0.0   | 0.0   | 0.0   | 0.0   | 0.0  |
| 21UR-55740 | 455.7 | 35.0  | 502.8 | 193.7 | 236.0 | 0.0  |
| 21UR-55750 | 1.0   | 0.0   | 1.0   | 0.0   | 0.0   | 0.0  |
| 21UR-55760 | 1.0   | 0.0   | 0.0   | 0.0   | 1.0   | 0.0  |
| 21UR-55780 | 1.0   | 1.0   | 1.0   | 1.0   | 0.0   | 0.0  |

|            |       |       |       |      |       |      |
|------------|-------|-------|-------|------|-------|------|
| 21UR-55790 | 10.5  | 5.0   | 12.0  | 0.0  | 2.0   | 0.0  |
| 21UR-5580  | 1.0   | 4.5   | 2.0   | 0.0  | 3.0   | 0.0  |
| 21UR-55800 | 0.0   | 0.0   | 0.0   | 0.0  | 0.0   | 0.0  |
| 21UR-55810 | 4.0   | 1.0   | 1.0   | 1.0  | 1.0   | 1.0  |
| 21UR-55820 | 0.0   | 0.0   | 0.0   | 0.0  | 0.0   | 0.0  |
| 21UR-55830 | 14.0  | 6.0   | 16.0  | 6.0  | 15.0  | 0.0  |
| 21UR-55840 | 0.0   | 0.0   | 0.0   | 0.0  | 0.0   | 0.0  |
| 21UR-55850 | 166.2 | 106.0 | 169.0 | 78.0 | 59.0  | 4.0  |
| 21UR-55860 | 1.0   | 0.0   | 1.0   | 1.0  | 0.0   | 0.0  |
| 21UR-55870 | 0.0   | 0.0   | 0.0   | 0.0  | 0.1   | 0.0  |
| 21UR-55880 | 0.0   | 0.0   | 0.0   | 0.0  | 0.0   | 0.0  |
| 21UR-55890 | 0.0   | 0.0   | 0.0   | 0.0  | 1.0   | 0.0  |
| 21UR-5590  | 4.0   | 1.0   | 7.0   | 0.0  | 0.0   | 0.0  |
| 21UR-55900 | 0.0   | 0.0   | 0.0   | 0.0  | 0.0   | 0.0  |
| 21UR-55910 | 0.0   | 2.0   | 1.0   | 0.0  | 0.5   | 0.0  |
| 21UR-55920 | 11.0  | 6.0   | 0.0   | 0.0  | 15.0  | 4.0  |
| 21UR-55940 | 4.0   | 6.0   | 4.0   | 1.0  | 0.0   | 0.0  |
| 21UR-55950 | 19.0  | 11.0  | 29.0  | 6.0  | 20.5  | 0.0  |
| 21UR-55960 | 0.0   | 0.0   | 0.0   | 0.0  | 4.0   | 0.0  |
| 21UR-55970 | 1.0   | 0.0   | 0.0   | 0.0  | 0.0   | 0.0  |
| 21UR-55980 | 0.0   | 0.0   | 0.0   | 0.0  | 0.0   | 0.0  |
| 21UR-55990 | 25.0  | 5.0   | 18.0  | 19.0 | 17.0  | 1.0  |
| 21UR-560   | 0.0   | 0.0   | 0.0   | 0.0  | 0.0   | 0.0  |
| 21UR-5600  | 0.0   | 0.0   | 0.0   | 0.0  | 0.0   | 0.0  |
| 21UR-56000 | 0.0   | 0.0   | 0.0   | 0.0  | 0.0   | 0.0  |
| 21UR-56010 | 0.0   | 0.0   | 0.0   | 0.0  | 3.0   | 0.0  |
| 21UR-56020 | 0.0   | 7.0   | 0.0   | 0.0  | 6.0   | 0.0  |
| 21UR-56030 | 14.0  | 9.1   | 6.0   | 1.0  | 1.0   | 0.0  |
| 21UR-56040 | 1.0   | 0.0   | 1.0   | 0.0  | 0.0   | 0.0  |
| 21UR-56050 | 54.0  | 4.0   | 37.0  | 24.0 | 1.0   | 0.0  |
| 21UR-56060 | 1.0   | 0.0   | 1.0   | 0.0  | 0.0   | 0.0  |
| 21UR-56070 | 27.0  | 0.0   | 17.0  | 8.0  | 1.0   | 1.0  |
| 21UR-56080 | 15.0  | 278.0 | 29.0  | 10.0 | 304.0 | 45.0 |
| 21UR-56090 | 0.0   | 8.0   | 4.0   | 0.0  | 5.0   | 1.0  |
| 21UR-5610  | 0.0   | 0.0   | 0.0   | 0.0  | 0.0   | 0.0  |
| 21UR-56100 | 331.5 | 6.0   | 254.0 | 55.0 | 26.0  | 1.0  |
| 21UR-56110 | 0.0   | 0.0   | 0.0   | 0.0  | 0.0   | 0.0  |
| 21UR-56120 | 0.0   | 0.2   | 1.0   | 0.0  | 0.0   | 0.0  |
| 21UR-56130 | 1.0   | 0.0   | 0.0   | 0.0  | 0.0   | 0.0  |
| 21UR-56140 | 69.5  | 20.2  | 57.0  | 23.0 | 16.0  | 2.0  |
| 21UR-56150 | 0.0   | 0.0   | 0.0   | 0.0  | 0.0   | 0.0  |
| 21UR-56160 | 0.0   | 0.0   | 0.0   | 0.0  | 0.0   | 0.0  |
| 21UR-56170 | 8.0   | 1.0   | 3.0   | 1.0  | 0.0   | 1.0  |
| 21UR-56180 | 0.0   | 0.0   | 4.0   | 0.0  | 0.0   | 0.0  |
| 21UR-5620  | 208.0 | 51.1  | 203.0 | 85.0 | 75.0  | 6.0  |
| 21UR-56200 | 108.0 | 29.0  | 55.0  | 23.0 | 22.0  | 1.0  |
| 21UR-56210 | 0.0   | 0.0   | 1.0   | 0.0  | 0.0   | 0.0  |
| 21UR-56220 | 4.0   | 14.2  | 8.0   | 0.0  | 14.0  | 0.0  |
| 21UR-56230 | 1.0   | 0.3   | 1.0   | 0.0  | 8.0   | 1.0  |
| 21UR-56240 | 7.0   | 0.0   | 8.0   | 1.0  | 0.0   | 0.0  |
| 21UR-56250 | 0.0   | 0.0   | 0.0   | 0.0  | 0.0   | 0.0  |

|            |       |       |       |      |       |      |
|------------|-------|-------|-------|------|-------|------|
| 21UR-56260 | 0.0   | 0.0   | 0.0   | 0.0  | 0.0   | 0.0  |
| 21UR-56280 | 61.0  | 121.0 | 92.0  | 28.0 | 250.0 | 33.0 |
| 21UR-56290 | 0.0   | 1.0   | 0.0   | 0.0  | 1.0   | 0.0  |
| 21UR-5630  | 6.0   | 0.0   | 4.0   | 0.0  | 3.0   | 0.0  |
| 21UR-56300 | 5.0   | 35.0  | 18.0  | 2.0  | 1.0   | 0.0  |
| 21UR-56310 | 0.0   | 0.0   | 0.0   | 0.0  | 0.0   | 0.0  |
| 21UR-56320 | 19.0  | 8.0   | 20.0  | 10.0 | 9.0   | 0.0  |
| 21UR-56330 | 0.0   | 0.0   | 1.0   | 0.0  | 0.0   | 1.0  |
| 21UR-56340 | 22.0  | 1.0   | 9.0   | 4.0  | 0.0   | 0.0  |
| 21UR-56350 | 0.0   | 0.0   | 0.0   | 0.0  | 4.0   | 0.0  |
| 21UR-56360 | 133.0 | 6.0   | 110.0 | 18.0 | 13.0  | 1.0  |
| 21UR-56370 | 0.0   | 0.0   | 1.0   | 0.0  | 1.0   | 0.0  |
| 21UR-56380 | 16.0  | 1.0   | 14.0  | 4.0  | 9.0   | 4.0  |
| 21UR-56390 | 1.0   | 0.0   | 0.0   | 0.0  | 0.0   | 0.0  |
| 21UR-5640  | 0.0   | 1.0   | 0.0   | 0.0  | 0.0   | 0.0  |
| 21UR-56400 | 90.0  | 1.0   | 37.0  | 11.0 | 1.0   | 0.0  |
| 21UR-56410 | 0.0   | 0.0   | 0.0   | 0.0  | 0.0   | 0.0  |
| 21UR-56420 | 0.0   | 1.0   | 0.0   | 4.0  | 0.0   | 0.0  |
| 21UR-56430 | 10.0  | 18.0  | 4.0   | 4.0  | 21.0  | 6.0  |
| 21UR-56440 | 0.0   | 4.0   | 0.0   | 0.0  | 0.0   | 0.0  |
| 21UR-56450 | 0.0   | 0.0   | 1.0   | 0.0  | 0.0   | 0.0  |
| 21UR-56470 | 0.0   | 0.0   | 0.0   | 0.0  | 0.0   | 0.0  |
| 21UR-56480 | 1.0   | 4.0   | 4.0   | 0.0  | 14.0  | 0.0  |
| 21UR-56490 | 33.0  | 33.0  | 32.0  | 14.0 | 40.0  | 11.0 |
| 21UR-56500 | 0.0   | 0.0   | 1.0   | 0.0  | 0.0   | 0.0  |
| 21UR-56510 | 4.0   | 5.0   | 1.0   | 1.0  | 9.0   | 2.0  |
| 21UR-56520 | 0.0   | 0.0   | 0.0   | 0.0  | 0.0   | 0.0  |
| 21UR-56530 | 46.8  | 10.0  | 21.0  | 4.0  | 1.0   | 4.0  |
| 21UR-56540 | 1.0   | 0.0   | 1.0   | 0.0  | 0.0   | 0.0  |
| 21UR-56550 | 1.0   | 0.0   | 4.0   | 0.0  | 0.0   | 0.0  |
| 21UR-56560 | 8.0   | 0.0   | 3.0   | 0.0  | 0.0   | 1.0  |
| 21UR-56570 | 0.0   | 0.0   | 0.0   | 1.0  | 0.0   | 0.0  |
| 21UR-56580 | 0.0   | 0.0   | 0.0   | 0.0  | 0.0   | 1.0  |
| 21UR-56590 | 1.0   | 0.0   | 0.0   | 0.0  | 0.0   | 1.0  |
| 21UR-5660  | 0.0   | 0.0   | 0.0   | 0.0  | 0.0   | 0.0  |
| 21UR-56600 | 0.0   | 0.0   | 4.0   | 1.0  | 5.0   | 4.0  |
| 21UR-56610 | 0.0   | 0.0   | 0.0   | 0.0  | 0.0   | 0.0  |
| 21UR-56620 | 1.0   | 0.0   | 1.0   | 0.0  | 4.0   | 0.0  |
| 21UR-56630 | 2.0   | 0.5   | 6.0   | 4.0  | 0.0   | 1.0  |
| 21UR-56640 | 0.0   | 4.0   | 1.0   | 0.0  | 4.0   | 1.0  |
| 21UR-56650 | 68.0  | 28.5  | 24.0  | 27.0 | 54.0  | 0.0  |
| 21UR-56660 | 0.0   | 0.0   | 0.0   | 0.0  | 0.0   | 0.0  |
| 21UR-56670 | 9.0   | 2.0   | 1.0   | 1.0  | 7.0   | 0.0  |
| 21UR-56680 | 4.0   | 4.0   | 4.0   | 0.0  | 0.0   | 0.0  |
| 21UR-56690 | 25.0  | 16.0  | 16.0  | 12.0 | 16.5  | 3.3  |
| 21UR-5670  | 0.0   | 0.0   | 0.0   | 0.0  | 0.0   | 0.0  |
| 21UR-56700 | 18.0  | 16.0  | 16.0  | 8.0  | 20.0  | 0.0  |
| 21UR-56710 | 1.0   | 0.0   | 1.0   | 1.0  | 0.0   | 0.0  |
| 21UR-56720 | 0.0   | 3.1   | 0.0   | 1.0  | 0.0   | 0.0  |
| 21UR-56730 | 0.0   | 0.0   | 0.0   | 0.0  | 0.0   | 0.0  |
| 21UR-56740 | 26.0  | 0.0   | 25.0  | 3.0  | 4.0   | 0.0  |

|            |        |       |        |        |       |      |
|------------|--------|-------|--------|--------|-------|------|
| 21UR-56750 | 3313.7 | 140.0 | 2502.0 | 1227.0 | 253.0 | 27.2 |
| 21UR-56760 | 1.0    | 1.0   | 0.0    | 0.0    | 0.0   | 1.0  |
| 21UR-56770 | 0.0    | 0.0   | 0.0    | 0.0    | 0.0   | 0.0  |
| 21UR-56780 | 0.0    | 0.0   | 0.0    | 0.0    | 0.0   | 0.0  |
| 21UR-5680  | 0.0    | 5.0   | 2.0    | 0.0    | 7.0   | 0.0  |
| 21UR-56800 | 0.0    | 1.0   | 0.0    | 0.0    | 1.0   | 1.0  |
| 21UR-56810 | 8.0    | 19.0  | 18.0   | 2.0    | 18.1  | 5.0  |
| 21UR-56820 | 10.0   | 0.0   | 4.0    | 0.0    | 4.0   | 0.0  |
| 21UR-56830 | 0.0    | 0.0   | 0.0    | 0.0    | 0.0   | 0.0  |
| 21UR-56840 | 0.0    | 0.0   | 1.0    | 0.0    | 0.0   | 0.0  |
| 21UR-56850 | 0.0    | 0.0   | 0.0    | 0.0    | 0.0   | 0.0  |
| 21UR-56860 | 4.0    | 0.0   | 0.0    | 0.0    | 0.0   | 0.0  |
| 21UR-56870 | 0.0    | 0.0   | 0.0    | 0.0    | 0.0   | 0.0  |
| 21UR-56880 | 0.0    | 1.0   | 0.0    | 0.0    | 0.0   | 0.0  |
| 21UR-56890 | 1.0    | 0.0   | 0.0    | 0.0    | 0.0   | 0.0  |
| 21UR-5690  | 31.0   | 90.0  | 25.0   | 10.0   | 112.6 | 13.0 |
| 21UR-56900 | 0.0    | 0.0   | 0.0    | 0.0    | 0.0   | 0.0  |
| 21UR-56910 | 0.0    | 1.0   | 0.0    | 0.0    | 0.0   | 0.0  |
| 21UR-56920 | 48.0   | 12.7  | 46.7   | 14.0   | 50.0  | 1.0  |
| 21UR-56930 | 8.0    | 1.0   | 10.0   | 0.0    | 10.0  | 0.0  |
| 21UR-56940 | 0.0    | 0.0   | 0.0    | 0.0    | 0.0   | 0.0  |
| 21UR-56950 | 19.0   | 24.0  | 14.0   | 8.0    | 59.2  | 3.0  |
| 21UR-56960 | 5.0    | 1.0   | 4.0    | 0.0    | 4.0   | 0.0  |
| 21UR-56970 | 0.0    | 2.0   | 0.0    | 0.0    | 0.0   | 0.0  |
| 21UR-56980 | 0.0    | 0.0   | 0.0    | 0.0    | 0.0   | 0.0  |
| 21UR-56990 | 165.0  | 93.7  | 172.5  | 80.0   | 57.5  | 2.0  |
| 21UR-570   | 8.0    | 1.0   | 1.0    | 2.0    | 4.1   | 0.0  |
| 21UR-57000 | 10.0   | 15.0  | 29.0   | 1.0    | 72.0  | 3.0  |
| 21UR-57010 | 0.0    | 0.0   | 1.0    | 0.0    | 0.0   | 0.0  |
| 21UR-57020 | 0.0    | 1.0   | 8.0    | 1.0    | 10.0  | 0.0  |
| 21UR-57030 | 9.0    | 11.0  | 19.0   | 4.0    | 10.0  | 0.0  |
| 21UR-57040 | 0.0    | 0.0   | 0.0    | 0.0    | 0.0   | 0.0  |
| 21UR-57050 | 0.0    | 0.0   | 0.0    | 0.0    | 0.0   | 0.0  |
| 21UR-57060 | 43.0   | 4.0   | 35.0   | 4.0    | 2.0   | 0.0  |
| 21UR-57070 | 0.0    | 0.0   | 0.0    | 0.0    | 0.0   | 0.0  |
| 21UR-57080 | 0.0    | 1.0   | 0.0    | 4.0    | 5.0   | 0.0  |
| 21UR-57090 | 1.0    | 1.0   | 0.0    | 0.0    | 0.0   | 0.0  |
| 21UR-5710  | 0.0    | 0.0   | 0.0    | 0.0    | 1.0   | 0.0  |
| 21UR-57100 | 0.0    | 0.0   | 1.0    | 0.0    | 1.0   | 0.0  |
| 21UR-57110 | 6.0    | 8.0   | 5.0    | 1.0    | 0.0   | 0.0  |
| 21UR-57120 | 0.0    | 0.0   | 1.0    | 0.0    | 0.0   | 0.0  |
| 21UR-57130 | 4.0    | 1.0   | 4.0    | 4.0    | 16.0  | 0.5  |
| 21UR-57140 | 63.0   | 15.0  | 94.0   | 38.0   | 14.0  | 1.0  |
| 21UR-57150 | 0.0    | 0.0   | 1.0    | 0.0    | 0.0   | 0.0  |
| 21UR-57160 | 0.0    | 0.0   | 0.0    | 0.0    | 0.0   | 0.0  |
| 21UR-57170 | 0.0    | 0.0   | 0.0    | 0.0    | 1.0   | 0.0  |
| 21UR-57180 | 33.0   | 1.0   | 33.0   | 11.0   | 9.0   | 1.0  |
| 21UR-57190 | 8.0    | 5.0   | 9.0    | 2.0    | 6.0   | 0.0  |
| 21UR-5720  | 8.0    | 0.0   | 9.0    | 1.0    | 1.0   | 1.0  |
| 21UR-57200 | 0.0    | 0.0   | 0.0    | 0.0    | 0.0   | 0.0  |
| 21UR-57210 | 0.5    | 0.0   | 0.0    | 0.0    | 1.0   | 0.0  |

|            |       |      |       |       |      |     |
|------------|-------|------|-------|-------|------|-----|
| 21UR-57220 | 67.0  | 5.0  | 34.0  | 13.0  | 7.0  | 0.0 |
| 21UR-57230 | 0.0   | 0.0  | 0.0   | 0.0   | 0.0  | 0.0 |
| 21UR-57240 | 4.0   | 1.5  | 12.0  | 1.0   | 15.0 | 0.0 |
| 21UR-57250 | 13.5  | 6.0  | 8.0   | 0.0   | 8.5  | 1.0 |
| 21UR-57260 | 0.0   | 1.0  | 0.0   | 0.0   | 0.0  | 1.0 |
| 21UR-57270 | 31.0  | 12.0 | 6.0   | 17.0  | 14.0 | 1.0 |
| 21UR-57280 | 33.0  | 26.0 | 20.0  | 11.0  | 26.0 | 5.0 |
| 21UR-57290 | 0.0   | 9.0  | 0.0   | 0.0   | 3.1  | 0.0 |
| 21UR-5730  | 1.0   | 1.0  | 1.0   | 0.0   | 0.0  | 0.0 |
| 21UR-57300 | 236.0 | 15.0 | 205.2 | 85.0  | 38.0 | 6.0 |
| 21UR-57310 | 6.0   | 0.0  | 3.0   | 4.0   | 0.0  | 0.0 |
| 21UR-57320 | 36.0  | 33.0 | 53.0  | 5.0   | 51.2 | 0.0 |
| 21UR-57330 | 28.0  | 4.0  | 16.0  | 8.0   | 0.0  | 0.0 |
| 21UR-57340 | 12.0  | 2.1  | 16.0  | 9.5   | 0.0  | 0.0 |
| 21UR-57360 | 0.0   | 0.0  | 0.0   | 0.0   | 0.0  | 0.0 |
| 21UR-57370 | 0.0   | 1.0  | 0.0   | 0.0   | 3.0  | 0.0 |
| 21UR-57380 | 295.0 | 25.0 | 176.0 | 65.0  | 35.0 | 3.5 |
| 21UR-57390 | 84.0  | 4.0  | 59.0  | 25.0  | 3.0  | 0.0 |
| 21UR-5740  | 4.0   | 9.0  | 4.0   | 0.0   | 18.0 | 0.0 |
| 21UR-57400 | 0.0   | 3.0  | 11.0  | 1.0   | 1.0  | 1.0 |
| 21UR-57410 | 8.0   | 0.0  | 0.0   | 1.0   | 1.0  | 0.0 |
| 21UR-57420 | 0.0   | 0.0  | 2.0   | 0.0   | 1.0  | 0.0 |
| 21UR-57430 | 8.0   | 0.5  | 6.0   | 7.0   | 3.0  | 0.0 |
| 21UR-57440 | 0.0   | 0.0  | 0.0   | 0.0   | 0.0  | 0.0 |
| 21UR-57450 | 0.0   | 1.0  | 1.0   | 0.0   | 1.0  | 0.0 |
| 21UR-57460 | 0.0   | 0.0  | 0.0   | 0.0   | 0.0  | 0.0 |
| 21UR-57470 | 0.0   | 1.0  | 0.0   | 0.0   | 0.0  | 0.0 |
| 21UR-57480 | 0.0   | 0.0  | 0.0   | 0.0   | 0.0  | 0.0 |
| 21UR-57490 | 0.0   | 4.0  | 0.0   | 0.0   | 3.0  | 4.0 |
| 21UR-57500 | 0.0   | 1.0  | 1.0   | 0.0   | 0.3  | 0.0 |
| 21UR-57510 | 0.0   | 0.0  | 0.0   | 0.0   | 0.0  | 0.0 |
| 21UR-57530 | 2.0   | 3.0  | 0.0   | 8.0   | 4.0  | 0.0 |
| 21UR-57540 | 0.0   | 0.0  | 0.0   | 0.0   | 0.0  | 0.0 |
| 21UR-57550 | 10.0  | 32.0 | 6.0   | 4.0   | 21.5 | 6.0 |
| 21UR-57560 | 0.0   | 0.0  | 1.0   | 0.0   | 0.0  | 0.0 |
| 21UR-57570 | 0.0   | 0.0  | 0.0   | 0.0   | 0.0  | 0.0 |
| 21UR-57580 | 155.0 | 62.0 | 172.0 | 48.0  | 55.0 | 4.0 |
| 21UR-57590 | 0.0   | 0.0  | 6.0   | 0.0   | 3.0  | 0.0 |
| 21UR-5760  | 0.0   | 0.0  | 1.0   | 0.0   | 0.0  | 0.0 |
| 21UR-57600 | 230.0 | 18.0 | 154.0 | 155.4 | 7.5  | 7.0 |
| 21UR-57610 | 0.0   | 0.0  | 0.0   | 1.0   | 1.0  | 0.0 |
| 21UR-57620 | 0.0   | 0.0  | 0.0   | 0.0   | 0.0  | 0.0 |
| 21UR-57630 | 15.5  | 1.0  | 6.0   | 8.0   | 2.0  | 1.0 |
| 21UR-57640 | 0.0   | 3.0  | 0.0   | 1.0   | 0.0  | 0.0 |
| 21UR-57650 | 6.0   | 0.0  | 6.0   | 0.0   | 0.0  | 0.0 |
| 21UR-57660 | 1.0   | 6.0  | 0.0   | 0.0   | 6.0  | 1.0 |
| 21UR-57670 | 1.0   | 1.0  | 1.0   | 6.0   | 0.0  | 0.0 |
| 21UR-57680 | 0.0   | 1.0  | 0.0   | 1.0   | 0.0  | 1.0 |
| 21UR-57690 | 0.0   | 0.0  | 0.0   | 0.0   | 0.0  | 0.0 |
| 21UR-5770  | 0.0   | 0.0  | 0.0   | 0.0   | 0.0  | 0.0 |
| 21UR-57700 | 1.0   | 1.0  | 0.0   | 0.0   | 0.0  | 0.0 |

|            |       |      |       |      |      |      |
|------------|-------|------|-------|------|------|------|
| 21UR-57710 | 43.0  | 10.0 | 17.0  | 4.0  | 4.0  | 0.0  |
| 21UR-57720 | 0.0   | 0.0  | 0.0   | 0.0  | 0.0  | 0.0  |
| 21UR-57730 | 0.0   | 0.0  | 0.0   | 0.0  | 0.0  | 0.0  |
| 21UR-57740 | 14.0  | 7.0  | 11.0  | 10.0 | 4.0  | 0.0  |
| 21UR-57750 | 84.0  | 44.0 | 68.0  | 17.0 | 59.0 | 3.0  |
| 21UR-57760 | 0.0   | 0.0  | 0.0   | 0.0  | 0.0  | 0.0  |
| 21UR-57770 | 0.0   | 0.0  | 0.0   | 0.0  | 0.5  | 0.0  |
| 21UR-57780 | 14.0  | 0.0  | 14.0  | 9.0  | 1.0  | 0.0  |
| 21UR-57790 | 0.0   | 0.0  | 0.0   | 0.0  | 0.0  | 1.0  |
| 21UR-5780  | 0.0   | 0.0  | 4.0   | 0.0  | 0.0  | 0.0  |
| 21UR-57800 | 6.0   | 0.0  | 0.0   | 1.0  | 0.0  | 1.0  |
| 21UR-57810 | 0.0   | 0.0  | 0.0   | 0.0  | 0.0  | 1.0  |
| 21UR-57820 | 1.0   | 0.0  | 0.0   | 0.0  | 0.0  | 1.0  |
| 21UR-57830 | 0.0   | 0.0  | 0.0   | 0.0  | 0.0  | 0.0  |
| 21UR-57840 | 0.0   | 0.0  | 0.0   | 0.0  | 0.0  | 0.0  |
| 21UR-57850 | 20.0  | 0.0  | 25.0  | 1.0  | 4.0  | 1.0  |
| 21UR-57860 | 1.0   | 0.0  | 1.0   | 0.0  | 2.0  | 0.0  |
| 21UR-57870 | 10.0  | 4.0  | 4.0   | 1.0  | 0.0  | 0.0  |
| 21UR-57880 | 47.0  | 11.0 | 38.0  | 11.0 | 23.0 | 1.0  |
| 21UR-57890 | 7.0   | 1.0  | 14.0  | 3.0  | 1.0  | 0.0  |
| 21UR-5790  | 0.0   | 0.0  | 0.0   | 0.0  | 0.0  | 0.0  |
| 21UR-57900 | 18.0  | 4.0  | 19.0  | 1.0  | 0.0  | 1.0  |
| 21UR-57910 | 1.0   | 0.0  | 1.0   | 0.0  | 0.0  | 0.0  |
| 21UR-57920 | 0.0   | 0.0  | 0.0   | 0.0  | 1.0  | 0.0  |
| 21UR-57930 | 6.0   | 1.0  | 8.0   | 0.0  | 1.0  | 0.0  |
| 21UR-57940 | 19.0  | 4.0  | 18.0  | 6.0  | 0.0  | 0.0  |
| 21UR-57950 | 84.0  | 27.0 | 68.0  | 17.0 | 23.0 | 10.0 |
| 21UR-57970 | 0.0   | 0.0  | 0.0   | 0.0  | 0.0  | 0.0  |
| 21UR-57980 | 0.0   | 0.0  | 1.0   | 0.0  | 0.0  | 0.0  |
| 21UR-57990 | 10.0  | 6.0  | 8.0   | 10.0 | 20.0 | 0.0  |
| 21UR-580   | 0.0   | 0.0  | 0.0   | 1.0  | 0.0  | 0.0  |
| 21UR-5800  | 5.0   | 0.0  | 1.0   | 1.0  | 1.0  | 0.0  |
| 21UR-58000 | 0.0   | 0.0  | 0.0   | 0.0  | 0.0  | 1.1  |
| 21UR-58010 | 8.0   | 1.0  | 1.0   | 1.0  | 8.0  | 0.0  |
| 21UR-58020 | 20.0  | 1.0  | 24.5  | 4.0  | 4.0  | 0.0  |
| 21UR-58030 | 1.0   | 0.0  | 0.0   | 0.0  | 0.0  | 0.0  |
| 21UR-58040 | 0.0   | 0.0  | 0.0   | 0.0  | 0.0  | 0.0  |
| 21UR-58050 | 0.0   | 1.0  | 0.0   | 0.0  | 1.0  | 1.0  |
| 21UR-58060 | 0.0   | 0.0  | 0.0   | 0.0  | 0.0  | 0.0  |
| 21UR-58070 | 0.0   | 0.0  | 0.0   | 0.0  | 0.0  | 0.0  |
| 21UR-58080 | 0.0   | 8.5  | 1.0   | 0.0  | 1.0  | 0.0  |
| 21UR-58090 | 0.0   | 0.0  | 0.0   | 0.0  | 0.0  | 0.0  |
| 21UR-5810  | 40.0  | 18.0 | 47.0  | 10.0 | 68.0 | 1.0  |
| 21UR-58100 | 57.0  | 10.0 | 34.0  | 3.5  | 15.0 | 8.0  |
| 21UR-58110 | 0.0   | 0.0  | 0.0   | 0.0  | 0.0  | 0.0  |
| 21UR-58120 | 6.0   | 0.3  | 1.0   | 0.0  | 4.0  | 0.0  |
| 21UR-58130 | 0.0   | 0.0  | 0.0   | 1.0  | 0.0  | 0.1  |
| 21UR-58140 | 0.0   | 0.0  | 0.0   | 0.0  | 6.0  | 1.0  |
| 21UR-58150 | 145.0 | 2.0  | 103.0 | 20.0 | 8.0  | 1.0  |
| 21UR-58160 | 0.0   | 0.0  | 0.0   | 0.0  | 0.0  | 0.0  |
| 21UR-58170 | 1.0   | 1.0  | 1.0   | 0.0  | 1.0  | 0.0  |



|            |       |       |       |       |       |      |
|------------|-------|-------|-------|-------|-------|------|
| 21UR-58180 | 386.0 | 157.0 | 327.5 | 168.5 | 114.5 | 28.0 |
| 21UR-58190 | 33.0  | 0.2   | 37.0  | 8.0   | 0.0   | 1.2  |
| 21UR-5820  | 1.0   | 3.0   | 0.0   | 0.0   | 8.0   | 1.0  |
| 21UR-58200 | 0.0   | 1.0   | 0.0   | 0.0   | 1.0   | 0.0  |
| 21UR-58210 | 16.0  | 4.0   | 1.0   | 3.0   | 8.0   | 0.0  |
| 21UR-58220 | 4.0   | 0.0   | 2.0   | 0.0   | 0.0   | 0.0  |
| 21UR-58230 | 4.0   | 0.0   | 0.0   | 0.0   | 0.0   | 0.0  |
| 21UR-58240 | 0.0   | 0.0   | 4.0   | 0.0   | 1.0   | 0.0  |
| 21UR-58250 | 0.0   | 0.0   | 0.0   | 0.0   | 0.0   | 0.0  |
| 21UR-58260 | 1.0   | 36.0  | 0.0   | 0.0   | 1.0   | 1.0  |
| 21UR-58270 | 19.0  | 24.0  | 37.0  | 26.0  | 66.0  | 5.0  |
| 21UR-58280 | 0.0   | 0.0   | 0.0   | 0.0   | 0.0   | 0.0  |
| 21UR-58290 | 0.0   | 0.0   | 0.0   | 0.0   | 0.0   | 0.0  |
| 21UR-5830  | 0.0   | 0.0   | 0.0   | 0.0   | 0.0   | 0.0  |
| 21UR-58300 | 0.0   | 0.0   | 1.0   | 0.0   | 0.0   | 0.0  |
| 21UR-58310 | 8.0   | 6.0   | 8.0   | 3.0   | 8.0   | 0.0  |
| 21UR-58320 | 105.0 | 47.0  | 104.0 | 26.0  | 61.0  | 2.0  |
| 21UR-58330 | 1.0   | 0.0   | 0.0   | 0.0   | 1.0   | 0.0  |
| 21UR-58340 | 3.0   | 6.0   | 1.0   | 1.0   | 4.0   | 0.0  |
| 21UR-58350 | 1.0   | 0.0   | 8.0   | 0.0   | 0.0   | 0.0  |
| 21UR-58360 | 25.0  | 0.0   | 6.0   | 0.0   | 1.0   | 0.0  |
| 21UR-58370 | 21.0  | 0.0   | 18.0  | 8.0   | 7.0   | 0.0  |
| 21UR-58380 | 0.0   | 0.0   | 1.0   | 0.0   | 1.0   | 0.0  |
| 21UR-58390 | 1.0   | 0.0   | 0.0   | 0.0   | 0.0   | 0.0  |
| 21UR-5840  | 0.0   | 0.0   | 0.0   | 0.0   | 0.0   | 0.0  |
| 21UR-58400 | 0.0   | 0.0   | 0.0   | 1.0   | 0.0   | 0.0  |
| 21UR-58410 | 0.0   | 0.0   | 0.0   | 0.0   | 0.0   | 0.0  |
| 21UR-58420 | 10.0  | 10.0  | 1.0   | 4.0   | 10.5  | 1.0  |
| 21UR-58430 | 4.0   | 0.0   | 0.0   | 0.0   | 0.0   | 0.0  |
| 21UR-58440 | 0.0   | 0.0   | 1.0   | 0.0   | 0.0   | 0.0  |
| 21UR-58450 | 0.0   | 1.0   | 1.0   | 0.0   | 0.0   | 0.0  |
| 21UR-58460 | 1.0   | 13.0  | 1.0   | 1.0   | 0.0   | 4.0  |
| 21UR-58470 | 29.0  | 9.5   | 59.5  | 28.0  | 65.5  | 0.0  |
| 21UR-58480 | 0.0   | 0.0   | 0.0   | 0.0   | 0.0   | 0.0  |
| 21UR-58490 | 8.0   | 2.0   | 11.0  | 4.0   | 4.0   | 0.0  |
| 21UR-5850  | 0.0   | 0.0   | 2.0   | 0.0   | 0.0   | 0.0  |
| 21UR-58500 | 0.0   | 0.0   | 0.0   | 0.0   | 0.0   | 0.0  |
| 21UR-58510 | 0.0   | 4.0   | 0.0   | 0.0   | 0.0   | 0.0  |
| 21UR-58520 | 10.0  | 1.0   | 4.0   | 0.0   | 3.0   | 0.0  |
| 21UR-58540 | 4.0   | 1.0   | 5.0   | 1.0   | 1.0   | 0.0  |
| 21UR-58550 | 15.0  | 0.0   | 12.0  | 8.0   | 3.0   | 1.0  |
| 21UR-58560 | 31.0  | 7.0   | 49.0  | 8.0   | 16.0  | 3.0  |
| 21UR-58570 | 0.0   | 0.0   | 0.0   | 0.0   | 0.0   | 0.0  |
| 21UR-58580 | 520.0 | 44.0  | 372.0 | 69.0  | 21.0  | 14.0 |
| 21UR-58590 | 0.0   | 0.0   | 0.0   | 0.0   | 0.0   | 0.0  |
| 21UR-5860  | 48.0  | 2.0   | 35.0  | 19.0  | 2.0   | 0.0  |
| 21UR-58600 | 1.0   | 0.0   | 0.0   | 0.0   | 0.0   | 0.0  |
| 21UR-58610 | 11.0  | 9.0   | 1.0   | 6.0   | 20.0  | 0.0  |
| 21UR-58620 | 1.0   | 0.0   | 0.0   | 0.0   | 1.0   | 0.0  |
| 21UR-58630 | 0.0   | 1.0   | 0.0   | 0.0   | 1.0   | 0.0  |
| 21UR-58640 | 0.0   | 0.0   | 0.0   | 4.0   | 0.0   | 0.0  |

|            |       |      |       |      |      |     |
|------------|-------|------|-------|------|------|-----|
| 21UR-58650 | 0.0   | 0.2  | 0.0   | 0.0  | 0.0  | 0.0 |
| 21UR-58660 | 0.0   | 0.0  | 0.0   | 0.0  | 0.0  | 0.0 |
| 21UR-58670 | 1.0   | 0.0  | 0.0   | 0.0  | 0.0  | 0.0 |
| 21UR-58680 | 0.0   | 0.0  | 0.0   | 0.0  | 0.0  | 0.0 |
| 21UR-58690 | 0.0   | 3.0  | 0.0   | 0.0  | 4.0  | 0.0 |
| 21UR-5870  | 1.0   | 9.0  | 0.0   | 0.0  | 9.0  | 2.0 |
| 21UR-58700 | 1.0   | 4.0  | 4.0   | 1.0  | 6.0  | 1.0 |
| 21UR-58710 | 2.0   | 0.0  | 2.0   | 0.0  | 1.0  | 1.0 |
| 21UR-58720 | 16.0  | 0.0  | 8.0   | 6.0  | 1.0  | 4.0 |
| 21UR-58730 | 1.0   | 1.0  | 0.0   | 0.0  | 1.0  | 1.0 |
| 21UR-58740 | 13.0  | 19.0 | 29.0  | 8.0  | 20.0 | 1.0 |
| 21UR-58750 | 24.0  | 1.0  | 20.0  | 2.0  | 3.0  | 0.0 |
| 21UR-58760 | 1.0   | 4.0  | 1.0   | 1.0  | 4.0  | 0.0 |
| 21UR-58770 | 79.0  | 5.0  | 56.5  | 17.0 | 6.0  | 6.0 |
| 21UR-58780 | 4.0   | 0.0  | 6.0   | 0.0  | 0.0  | 0.0 |
| 21UR-58790 | 0.0   | 0.0  | 0.0   | 0.0  | 0.0  | 0.0 |
| 21UR-5880  | 0.0   | 1.0  | 0.0   | 0.0  | 1.0  | 0.0 |
| 21UR-58800 | 3.0   | 5.0  | 12.0  | 0.0  | 4.0  | 4.0 |
| 21UR-58810 | 0.0   | 0.0  | 0.0   | 0.0  | 0.0  | 0.0 |
| 21UR-58820 | 7.0   | 1.0  | 5.0   | 1.0  | 0.0  | 0.0 |
| 21UR-58830 | 6.0   | 1.0  | 1.0   | 0.0  | 1.0  | 0.0 |
| 21UR-58840 | 0.0   | 0.0  | 0.0   | 0.0  | 0.0  | 0.0 |
| 21UR-58850 | 1.0   | 0.0  | 0.0   | 0.0  | 0.0  | 0.0 |
| 21UR-58860 | 358.8 | 12.0 | 261.0 | 88.3 | 27.0 | 1.0 |
| 21UR-58870 | 0.0   | 2.0  | 1.0   | 0.0  | 1.0  | 6.0 |
| 21UR-58880 | 83.0  | 10.0 | 71.0  | 34.0 | 20.0 | 0.0 |
| 21UR-58890 | 59.0  | 24.0 | 46.0  | 10.0 | 16.0 | 3.0 |
| 21UR-5890  | 0.0   | 0.0  | 0.0   | 0.0  | 0.0  | 0.0 |
| 21UR-58900 | 18.0  | 1.4  | 23.0  | 0.0  | 6.0  | 0.0 |
| 21UR-58910 | 0.0   | 0.0  | 0.0   | 0.0  | 6.0  | 1.0 |
| 21UR-58920 | 1.0   | 0.0  | 0.0   | 0.0  | 4.0  | 0.0 |
| 21UR-58930 | 0.0   | 0.0  | 0.0   | 0.0  | 0.0  | 0.0 |
| 21UR-58940 | 0.0   | 0.0  | 0.0   | 1.0  | 1.0  | 0.0 |
| 21UR-58950 | 33.0  | 4.0  | 20.0  | 9.0  | 8.0  | 0.0 |
| 21UR-58960 | 0.0   | 1.0  | 0.0   | 0.0  | 1.0  | 0.0 |
| 21UR-58970 | 118.0 | 5.0  | 130.0 | 31.0 | 2.0  | 0.0 |
| 21UR-58980 | 11.0  | 2.0  | 4.0   | 4.0  | 10.0 | 0.0 |
| 21UR-58990 | 4.0   | 0.0  | 4.0   | 3.0  | 3.0  | 0.0 |
| 21UR-590   | 222.0 | 14.0 | 144.0 | 75.0 | 27.0 | 0.0 |
| 21UR-5900  | 1.0   | 3.0  | 0.0   | 0.0  | 3.0  | 0.0 |
| 21UR-59000 | 0.0   | 0.0  | 0.0   | 0.0  | 0.0  | 0.0 |
| 21UR-59010 | 56.0  | 3.0  | 25.0  | 11.0 | 10.0 | 0.0 |
| 21UR-59020 | 0.0   | 0.0  | 1.0   | 0.0  | 0.0  | 0.0 |
| 21UR-59030 | 0.0   | 1.0  | 0.0   | 0.0  | 0.0  | 0.0 |
| 21UR-59040 | 6.0   | 0.0  | 0.0   | 0.0  | 0.0  | 0.0 |
| 21UR-59050 | 0.0   | 0.0  | 0.0   | 0.0  | 0.0  | 0.0 |
| 21UR-59060 | 0.0   | 0.0  | 1.0   | 0.0  | 0.0  | 0.0 |
| 21UR-59070 | 0.0   | 0.0  | 0.0   | 0.0  | 0.0  | 0.0 |
| 21UR-59080 | 1.0   | 1.0  | 3.0   | 0.0  | 1.0  | 2.0 |
| 21UR-59090 | 0.0   | 0.0  | 0.0   | 0.0  | 0.0  | 1.0 |
| 21UR-5910  | 1.0   | 0.0  | 0.0   | 0.0  | 1.0  | 0.0 |

|            |       |       |       |       |       |      |
|------------|-------|-------|-------|-------|-------|------|
| 21UR-59100 | 0.0   | 0.0   | 0.0   | 0.0   | 0.0   | 0.0  |
| 21UR-59110 | 0.0   | 1.0   | 0.0   | 0.0   | 0.0   | 0.0  |
| 21UR-59120 | 0.0   | 3.0   | 0.0   | 0.0   | 0.0   | 0.0  |
| 21UR-59130 | 45.0  | 14.0  | 22.0  | 17.0  | 20.0  | 0.0  |
| 21UR-59140 | 0.0   | 0.0   | 0.0   | 0.0   | 0.0   | 0.0  |
| 21UR-59150 | 0.0   | 0.0   | 0.0   | 0.0   | 0.0   | 0.0  |
| 21UR-59160 | 0.0   | 0.0   | 0.0   | 0.0   | 0.0   | 0.0  |
| 21UR-59170 | 0.0   | 0.0   | 0.0   | 0.0   | 0.0   | 0.0  |
| 21UR-59180 | 2.0   | 0.0   | 1.0   | 0.0   | 0.0   | 0.0  |
| 21UR-59190 | 8.0   | 1.0   | 6.0   | 6.0   | 0.0   | 0.0  |
| 21UR-5920  | 3.0   | 4.0   | 2.0   | 2.0   | 2.0   | 0.0  |
| 21UR-59200 | 0.0   | 0.1   | 0.0   | 0.0   | 0.0   | 0.0  |
| 21UR-59210 | 80.0  | 6.0   | 10.0  | 8.0   | 1.0   | 0.0  |
| 21UR-59220 | 0.0   | 1.0   | 0.0   | 0.0   | 0.0   | 0.0  |
| 21UR-59230 | 2.0   | 2.0   | 4.0   | 1.0   | 0.0   | 0.0  |
| 21UR-59240 | 4.0   | 0.0   | 6.0   | 0.0   | 2.0   | 0.0  |
| 21UR-59250 | 0.0   | 0.0   | 0.0   | 0.0   | 0.0   | 0.0  |
| 21UR-59260 | 0.0   | 0.0   | 0.0   | 0.0   | 0.2   | 0.0  |
| 21UR-59270 | 883.2 | 325.0 | 808.0 | 219.0 | 434.7 | 66.5 |
| 21UR-59280 | 0.0   | 3.0   | 0.0   | 0.0   | 0.0   | 1.0  |
| 21UR-59290 | 6.0   | 7.0   | 6.0   | 0.0   | 0.0   | 0.0  |
| 21UR-5930  | 0.0   | 1.0   | 1.0   | 0.0   | 0.0   | 0.0  |
| 21UR-59300 | 0.0   | 0.0   | 0.0   | 0.0   | 0.0   | 0.0  |
| 21UR-59310 | 1.0   | 1.0   | 0.0   | 0.0   | 0.0   | 0.0  |
| 21UR-59320 | 0.0   | 0.0   | 1.0   | 0.0   | 0.0   | 0.0  |
| 21UR-59330 | 0.0   | 0.0   | 0.0   | 0.0   | 0.0   | 0.0  |
| 21UR-59340 | 62.0  | 7.0   | 39.5  | 14.0  | 6.0   | 0.0  |
| 21UR-59350 | 16.0  | 13.0  | 22.0  | 4.0   | 6.0   | 1.0  |
| 21UR-59360 | 4.0   | 1.0   | 4.0   | 0.0   | 1.0   | 0.0  |
| 21UR-59370 | 151.0 | 2.0   | 91.0  | 15.0  | 4.0   | 0.0  |
| 21UR-59380 | 0.0   | 0.0   | 0.0   | 0.0   | 0.0   | 0.0  |
| 21UR-59390 | 0.0   | 1.0   | 0.0   | 0.0   | 1.0   | 0.0  |
| 21UR-5940  | 0.0   | 1.0   | 0.0   | 0.0   | 1.0   | 0.0  |
| 21UR-59400 | 1.0   | 1.0   | 1.0   | 1.0   | 4.0   | 0.0  |
| 21UR-59410 | 148.0 | 12.0  | 139.0 | 26.0  | 4.0   | 4.0  |
| 21UR-59420 | 0.0   | 1.0   | 0.0   | 0.0   | 0.0   | 0.0  |
| 21UR-59430 | 0.0   | 2.0   | 0.0   | 0.0   | 1.0   | 0.0  |
| 21UR-59440 | 3.0   | 0.0   | 0.0   | 0.0   | 0.0   | 0.0  |
| 21UR-59450 | 0.0   | 0.0   | 0.0   | 0.0   | 0.0   | 0.0  |
| 21UR-59460 | 87.0  | 10.0  | 77.0  | 27.0  | 35.0  | 1.0  |
| 21UR-59470 | 0.0   | 4.0   | 0.0   | 0.0   | 0.0   | 0.0  |
| 21UR-59480 | 1.0   | 0.0   | 1.0   | 0.0   | 1.0   | 0.0  |
| 21UR-59490 | 2.0   | 0.0   | 0.0   | 0.0   | 0.0   | 0.0  |
| 21UR-5950  | 0.0   | 0.0   | 0.0   | 0.0   | 0.0   | 0.0  |
| 21UR-59500 | 155.0 | 1.0   | 114.0 | 27.0  | 6.0   | 1.0  |
| 21UR-59510 | 8.0   | 4.0   | 12.0  | 1.0   | 11.0  | 0.0  |
| 21UR-59520 | 0.0   | 0.0   | 2.0   | 0.0   | 1.0   | 0.0  |
| 21UR-59530 | 13.5  | 2.0   | 17.5  | 12.0  | 15.0  | 1.0  |
| 21UR-59540 | 1.2   | 0.0   | 8.0   | 1.3   | 2.0   | 0.0  |
| 21UR-59550 | 1.0   | 3.0   | 1.0   | 0.0   | 1.0   | 0.0  |
| 21UR-59560 | 0.0   | 0.0   | 0.0   | 0.0   | 0.0   | 0.0  |

|            |       |      |       |      |      |     |
|------------|-------|------|-------|------|------|-----|
| 21UR-59570 | 0.0   | 0.0  | 5.0   | 0.0  | 0.0  | 0.0 |
| 21UR-59580 | 2.0   | 1.0  | 4.0   | 0.0  | 1.0  | 0.0 |
| 21UR-59590 | 0.0   | 0.0  | 1.0   | 0.0  | 3.0  | 0.0 |
| 21UR-5960  | 4.0   | 2.0  | 4.0   | 0.0  | 6.0  | 0.0 |
| 21UR-59600 | 2.0   | 1.0  | 1.0   | 0.0  | 1.0  | 0.0 |
| 21UR-59610 | 6.0   | 10.0 | 10.0  | 0.0  | 9.0  | 1.0 |
| 21UR-59620 | 2.0   | 3.0  | 3.0   | 0.0  | 0.0  | 0.0 |
| 21UR-59630 | 2.0   | 0.0  | 1.0   | 0.0  | 0.0  | 0.0 |
| 21UR-59650 | 0.0   | 0.0  | 1.0   | 0.0  | 0.0  | 0.0 |
| 21UR-59660 | 0.0   | 0.0  | 0.0   | 0.0  | 0.0  | 0.0 |
| 21UR-59670 | 6.0   | 1.0  | 8.0   | 0.0  | 6.0  | 1.0 |
| 21UR-59680 | 0.0   | 0.0  | 0.0   | 0.0  | 1.0  | 0.0 |
| 21UR-59690 | 0.0   | 0.0  | 0.0   | 0.0  | 0.0  | 0.0 |
| 21UR-5970  | 35.0  | 3.0  | 21.0  | 7.0  | 6.0  | 0.0 |
| 21UR-59700 | 0.0   | 4.0  | 0.0   | 0.0  | 0.0  | 0.0 |
| 21UR-59710 | 0.0   | 0.0  | 0.0   | 0.0  | 0.0  | 0.0 |
| 21UR-59720 | 0.0   | 0.0  | 0.0   | 0.0  | 0.0  | 0.0 |
| 21UR-59730 | 4.0   | 0.0  | 1.0   | 0.0  | 0.1  | 0.0 |
| 21UR-59740 | 1.0   | 5.0  | 8.0   | 1.0  | 4.0  | 0.0 |
| 21UR-59750 | 37.0  | 3.0  | 55.0  | 10.0 | 8.0  | 1.0 |
| 21UR-59760 | 0.0   | 1.0  | 0.0   | 0.0  | 0.0  | 0.0 |
| 21UR-59770 | 0.0   | 0.0  | 0.0   | 0.0  | 0.0  | 0.0 |
| 21UR-59780 | 224.0 | 24.0 | 190.0 | 71.0 | 74.0 | 4.0 |
| 21UR-59790 | 0.0   | 1.0  | 0.0   | 0.0  | 0.0  | 0.0 |
| 21UR-5980  | 1.0   | 0.0  | 1.0   | 1.0  | 0.0  | 0.0 |
| 21UR-59800 | 1.0   | 0.0  | 1.0   | 0.0  | 0.2  | 0.0 |
| 21UR-59820 | 3.0   | 4.0  | 1.0   | 0.0  | 4.0  | 0.0 |
| 21UR-59830 | 0.0   | 0.0  | 0.0   | 0.0  | 0.0  | 0.0 |
| 21UR-59840 | 0.0   | 8.0  | 0.0   | 0.0  | 12.0 | 0.0 |
| 21UR-59850 | 0.0   | 0.0  | 0.0   | 0.0  | 0.0  | 0.0 |
| 21UR-59860 | 0.0   | 0.0  | 0.0   | 0.0  | 1.0  | 0.0 |
| 21UR-59870 | 0.0   | 0.0  | 1.0   | 0.0  | 1.0  | 0.0 |
| 21UR-59880 | 0.0   | 0.0  | 0.0   | 0.0  | 0.0  | 0.0 |
| 21UR-59890 | 0.0   | 0.0  | 4.0   | 0.0  | 0.0  | 0.0 |
| 21UR-5990  | 0.0   | 0.0  | 0.0   | 0.0  | 0.0  | 0.0 |
| 21UR-59900 | 9.0   | 2.0  | 6.0   | 1.0  | 6.0  | 1.0 |
| 21UR-59920 | 0.0   | 0.0  | 0.0   | 0.0  | 0.0  | 0.0 |
| 21UR-59930 | 0.0   | 0.0  | 0.0   | 0.0  | 0.0  | 0.0 |
| 21UR-59940 | 14.0  | 5.0  | 7.0   | 3.0  | 10.0 | 0.0 |
| 21UR-59950 | 0.0   | 0.0  | 0.0   | 0.0  | 0.0  | 0.0 |
| 21UR-59960 | 14.0  | 2.0  | 10.0  | 3.0  | 4.0  | 0.0 |
| 21UR-59970 | 6.0   | 0.0  | 8.0   | 1.0  | 0.0  | 0.0 |
| 21UR-59980 | 0.0   | 0.0  | 0.0   | 0.0  | 0.0  | 0.0 |
| 21UR-59990 | 0.0   | 0.0  | 0.0   | 0.0  | 0.0  | 0.0 |
| 21UR-60    | 1.0   | 1.0  | 4.0   | 0.0  | 0.0  | 0.0 |
| 21UR-600   | 48.0  | 16.0 | 25.0  | 17.0 | 50.0 | 5.0 |
| 21UR-6000  | 0.0   | 2.0  | 0.0   | 0.0  | 0.0  | 0.0 |
| 21UR-60000 | 0.0   | 3.0  | 0.0   | 0.0  | 1.0  | 0.0 |
| 21UR-60010 | 13.0  | 9.0  | 14.0  | 5.5  | 32.5 | 0.0 |
| 21UR-60020 | 1.0   | 0.0  | 3.0   | 1.0  | 0.0  | 0.0 |
| 21UR-60030 | 0.0   | 0.2  | 0.0   | 0.0  | 0.0  | 0.0 |

|            |       |       |       |       |       |      |
|------------|-------|-------|-------|-------|-------|------|
| 21UR-60040 | 3.0   | 0.0   | 1.0   | 0.0   | 0.0   | 0.0  |
| 21UR-60050 | 1.0   | 0.0   | 1.0   | 0.0   | 0.0   | 0.0  |
| 21UR-60060 | 1.0   | 0.0   | 0.0   | 0.0   | 0.0   | 0.0  |
| 21UR-60070 | 21.0  | 7.0   | 11.0  | 4.0   | 6.0   | 0.0  |
| 21UR-60080 | 88.0  | 2.0   | 48.5  | 8.0   | 4.0   | 3.0  |
| 21UR-60090 | 0.0   | 1.0   | 1.0   | 0.0   | 6.0   | 0.1  |
| 21UR-6010  | 0.0   | 13.0  | 0.0   | 0.0   | 3.0   | 1.0  |
| 21UR-60100 | 13.0  | 1.0   | 13.5  | 1.0   | 0.0   | 0.0  |
| 21UR-60110 | 14.0  | 0.0   | 7.0   | 1.0   | 1.0   | 0.0  |
| 21UR-60120 | 0.0   | 0.0   | 4.0   | 0.0   | 0.0   | 0.0  |
| 21UR-60130 | 1.0   | 0.0   | 0.0   | 0.0   | 0.0   | 0.0  |
| 21UR-60140 | 0.0   | 0.0   | 0.0   | 0.0   | 0.0   | 0.0  |
| 21UR-60150 | 0.0   | 0.0   | 0.0   | 0.0   | 1.3   | 0.0  |
| 21UR-60160 | 342.0 | 205.0 | 292.0 | 91.0  | 185.0 | 7.0  |
| 21UR-60170 | 0.0   | 4.0   | 1.0   | 0.0   | 0.0   | 0.0  |
| 21UR-60180 | 0.0   | 1.0   | 0.0   | 0.0   | 0.0   | 0.0  |
| 21UR-60190 | 1.0   | 0.0   | 1.0   | 2.0   | 0.0   | 0.0  |
| 21UR-6020  | 42.0  | 34.6  | 50.0  | 18.0  | 17.1  | 4.0  |
| 21UR-60200 | 6.0   | 2.0   | 5.0   | 0.0   | 4.0   | 0.0  |
| 21UR-60210 | 0.0   | 1.0   | 0.0   | 0.0   | 2.0   | 0.0  |
| 21UR-60220 | 43.0  | 4.0   | 28.0  | 0.0   | 1.0   | 1.0  |
| 21UR-60230 | 0.0   | 8.0   | 6.0   | 0.0   | 11.0  | 0.0  |
| 21UR-60240 | 8.0   | 1.0   | 15.0  | 1.0   | 0.0   | 0.0  |
| 21UR-60250 | 1.0   | 0.0   | 1.0   | 0.0   | 3.0   | 1.0  |
| 21UR-60260 | 0.0   | 0.0   | 0.0   | 0.0   | 0.0   | 0.0  |
| 21UR-60270 | 0.0   | 0.0   | 0.0   | 0.0   | 0.0   | 0.0  |
| 21UR-60280 | 0.0   | 0.0   | 0.0   | 0.0   | 0.0   | 0.0  |
| 21UR-60290 | 6.0   | 0.0   | 5.0   | 0.0   | 0.0   | 0.0  |
| 21UR-6030  | 159.0 | 18.0  | 140.0 | 73.0  | 31.0  | 9.0  |
| 21UR-60300 | 20.0  | 5.0   | 26.0  | 12.0  | 13.2  | 0.0  |
| 21UR-60310 | 9.0   | 6.0   | 15.0  | 0.0   | 2.0   | 0.0  |
| 21UR-60320 | 0.0   | 0.0   | 0.0   | 0.0   | 0.0   | 0.0  |
| 21UR-60330 | 6.0   | 4.0   | 4.0   | 0.0   | 0.0   | 0.0  |
| 21UR-60340 | 16.0  | 6.0   | 8.0   | 1.0   | 3.0   | 0.0  |
| 21UR-60350 | 0.0   | 4.0   | 4.0   | 0.0   | 0.0   | 0.0  |
| 21UR-60360 | 10.0  | 1.5   | 2.0   | 0.0   | 12.0  | 1.0  |
| 21UR-60370 | 4.0   | 1.0   | 1.0   | 4.0   | 1.0   | 0.0  |
| 21UR-60380 | 0.0   | 5.0   | 1.0   | 3.0   | 6.2   | 0.0  |
| 21UR-60390 | 0.0   | 0.0   | 0.0   | 0.0   | 0.0   | 0.0  |
| 21UR-6040  | 1.0   | 1.0   | 4.0   | 0.0   | 1.0   | 0.0  |
| 21UR-60400 | 0.0   | 0.0   | 0.0   | 0.0   | 0.0   | 0.0  |
| 21UR-60410 | 591.0 | 331.0 | 641.0 | 274.0 | 356.0 | 21.0 |
| 21UR-60420 | 0.0   | 0.0   | 0.0   | 0.0   | 0.0   | 0.0  |
| 21UR-60430 | 0.0   | 0.0   | 0.0   | 0.0   | 0.0   | 0.0  |
| 21UR-60440 | 0.0   | 0.0   | 1.0   | 0.0   | 1.0   | 0.0  |
| 21UR-60450 | 0.0   | 1.0   | 1.0   | 0.0   | 1.0   | 1.0  |
| 21UR-60470 | 10.0  | 15.5  | 10.0  | 0.0   | 11.0  | 2.0  |
| 21UR-60480 | 4.0   | 0.0   | 0.0   | 0.0   | 0.0   | 0.0  |
| 21UR-60490 | 5.0   | 4.0   | 0.0   | 0.0   | 1.0   | 0.0  |
| 21UR-60500 | 18.0  | 11.0  | 22.0  | 4.0   | 1.0   | 0.0  |
| 21UR-60510 | 0.0   | 0.0   | 0.0   | 0.0   | 3.0   | 1.0  |

|            |        |       |        |        |       |      |
|------------|--------|-------|--------|--------|-------|------|
| 21UR-60520 | 0.0    | 0.0   | 0.0    | 0.0    | 0.0   | 0.0  |
| 21UR-60530 | 0.0    | 0.0   | 0.0    | 1.0    | 1.0   | 0.0  |
| 21UR-60550 | 0.0    | 0.0   | 1.0    | 0.0    | 0.0   | 0.0  |
| 21UR-60560 | 0.0    | 0.0   | 0.0    | 0.0    | 0.0   | 0.0  |
| 21UR-60570 | 36.0   | 6.0   | 28.0   | 13.0   | 13.7  | 0.0  |
| 21UR-60580 | 42.0   | 0.0   | 27.0   | 7.0    | 4.0   | 0.0  |
| 21UR-60590 | 6.0    | 0.0   | 12.0   | 10.0   | 11.0  | 0.0  |
| 21UR-6060  | 0.0    | 0.0   | 0.0    | 0.0    | 1.0   | 0.0  |
| 21UR-60600 | 0.0    | 0.0   | 0.0    | 0.0    | 0.0   | 0.0  |
| 21UR-60610 | 0.0    | 0.0   | 0.0    | 0.0    | 0.0   | 0.0  |
| 21UR-60620 | 28.0   | 15.0  | 29.0   | 12.0   | 4.0   | 4.0  |
| 21UR-60630 | 3.0    | 0.0   | 3.0    | 0.0    | 1.0   | 0.0  |
| 21UR-60640 | 4.0    | 10.0  | 4.0    | 0.0    | 2.0   | 1.0  |
| 21UR-60650 | 0.0    | 0.0   | 1.0    | 0.0    | 4.0   | 0.0  |
| 21UR-60660 | 0.0    | 0.1   | 0.0    | 0.0    | 1.0   | 0.0  |
| 21UR-60670 | 1.0    | 0.0   | 8.0    | 1.0    | 1.0   | 0.0  |
| 21UR-60680 | 0.0    | 0.0   | 0.0    | 0.0    | 0.0   | 0.0  |
| 21UR-60690 | 0.0    | 0.0   | 1.0    | 0.0    | 0.0   | 0.0  |
| 21UR-6070  | 287.0  | 43.0  | 236.1  | 101.0  | 59.0  | 6.0  |
| 21UR-60700 | 0.0    | 0.0   | 0.0    | 0.0    | 0.0   | 0.0  |
| 21UR-60710 | 7.0    | 1.0   | 9.0    | 1.0    | 4.0   | 0.0  |
| 21UR-60720 | 0.0    | 1.0   | 1.0    | 0.0    | 0.0   | 0.0  |
| 21UR-60730 | 6.0    | 2.0   | 2.0    | 0.0    | 3.5   | 1.0  |
| 21UR-60740 | 0.0    | 0.0   | 0.0    | 0.0    | 0.0   | 0.0  |
| 21UR-60750 | 0.0    | 0.0   | 1.0    | 0.0    | 1.0   | 0.0  |
| 21UR-60760 | 0.0    | 0.0   | 0.0    | 0.0    | 0.0   | 0.0  |
| 21UR-60770 | 2.0    | 0.0   | 1.0    | 1.0    | 0.0   | 0.0  |
| 21UR-60780 | 1.0    | 0.0   | 1.0    | 0.0    | 3.0   | 0.0  |
| 21UR-60790 | 12.0   | 6.0   | 2.0    | 0.0    | 13.0  | 0.0  |
| 21UR-6080  | 4.0    | 3.0   | 4.0    | 0.0    | 19.0  | 2.0  |
| 21UR-60800 | 1.0    | 1.0   | 3.0    | 1.0    | 4.0   | 2.0  |
| 21UR-60810 | 0.0    | 1.0   | 0.0    | 0.0    | 0.0   | 0.0  |
| 21UR-60820 | 12.0   | 18.0  | 10.0   | 6.0    | 23.0  | 1.0  |
| 21UR-60840 | 0.0    | 0.0   | 0.0    | 0.0    | 0.0   | 0.0  |
| 21UR-60850 | 112.0  | 30.0  | 128.0  | 20.0   | 39.0  | 6.0  |
| 21UR-60860 | 8.0    | 0.0   | 10.0   | 12.0   | 17.0  | 0.0  |
| 21UR-60870 | 1.0    | 0.0   | 0.0    | 0.0    | 1.0   | 1.0  |
| 21UR-60880 | 0.0    | 0.0   | 0.0    | 1.0    | 0.0   | 0.0  |
| 21UR-60890 | 1.0    | 0.0   | 0.0    | 0.0    | 0.0   | 0.0  |
| 21UR-6090  | 8049.5 | 618.0 | 7180.5 | 3506.5 | 535.7 | 29.0 |
| 21UR-60900 | 1.0    | 7.0   | 6.0    | 0.0    | 14.3  | 0.0  |
| 21UR-60910 | 0.0    | 1.0   | 0.0    | 0.0    | 1.0   | 0.0  |
| 21UR-60920 | 0.0    | 0.0   | 0.0    | 0.0    | 0.0   | 0.1  |
| 21UR-60930 | 0.0    | 0.0   | 0.0    | 0.0    | 0.0   | 0.0  |
| 21UR-60940 | 13.0   | 11.7  | 0.0    | 1.0    | 0.0   | 0.0  |
| 21UR-60950 | 1.0    | 4.0   | 1.0    | 0.0    | 2.0   | 2.0  |
| 21UR-60960 | 17.0   | 4.0   | 9.0    | 0.0    | 4.0   | 0.0  |
| 21UR-60970 | 0.0    | 5.0   | 0.0    | 0.0    | 1.0   | 0.0  |
| 21UR-60980 | 512.0  | 22.0  | 446.0  | 124.0  | 6.0   | 1.0  |
| 21UR-60990 | 0.0    | 0.0   | 0.0    | 0.0    | 0.0   | 0.0  |
| 21UR-610   | 151.0  | 23.0  | 125.0  | 29.0   | 66.5  | 1.0  |

|            |        |       |        |       |       |      |
|------------|--------|-------|--------|-------|-------|------|
| 21UR-6100  | 0.0    | 1.0   | 0.0    | 0.0   | 0.0   | 0.0  |
| 21UR-61000 | 0.0    | 0.0   | 1.0    | 0.0   | 0.0   | 0.0  |
| 21UR-61010 | 4.0    | 0.0   | 4.0    | 0.0   | 0.0   | 0.0  |
| 21UR-61020 | 6.0    | 0.0   | 1.0    | 0.0   | 0.0   | 0.0  |
| 21UR-61040 | 8.0    | 2.0   | 6.0    | 0.0   | 15.0  | 1.0  |
| 21UR-61050 | 0.0    | 1.0   | 0.0    | 0.0   | 0.0   | 0.0  |
| 21UR-61060 | 24.0   | 10.0  | 23.0   | 7.0   | 3.0   | 4.0  |
| 21UR-61070 | 2.0    | 1.0   | 8.0    | 1.0   | 4.0   | 0.0  |
| 21UR-61080 | 0.0    | 0.0   | 0.0    | 0.0   | 0.0   | 0.0  |
| 21UR-6110  | 1.0    | 0.0   | 6.0    | 6.0   | 0.0   | 1.0  |
| 21UR-61100 | 0.0    | 0.0   | 0.0    | 0.0   | 0.0   | 0.0  |
| 21UR-61110 | 0.0    | 0.0   | 0.0    | 0.0   | 0.0   | 0.0  |
| 21UR-61120 | 0.0    | 0.0   | 0.0    | 0.0   | 0.0   | 0.0  |
| 21UR-61130 | 27.0   | 22.0  | 37.0   | 5.0   | 46.7  | 3.0  |
| 21UR-61140 | 0.0    | 0.0   | 1.0    | 0.0   | 9.0   | 1.0  |
| 21UR-61150 | 1.0    | 0.0   | 1.0    | 0.0   | 0.0   | 0.0  |
| 21UR-61160 | 0.0    | 0.0   | 0.0    | 0.0   | 0.0   | 0.0  |
| 21UR-61170 | 19.0   | 5.0   | 4.0    | 1.0   | 7.0   | 3.0  |
| 21UR-61180 | 1.0    | 0.0   | 1.0    | 0.0   | 1.0   | 0.0  |
| 21UR-61190 | 9.0    | 3.0   | 8.0    | 3.0   | 1.0   | 0.0  |
| 21UR-6120  | 0.0    | 0.0   | 0.0    | 0.0   | 0.0   | 0.0  |
| 21UR-61200 | 0.0    | 0.0   | 0.0    | 0.0   | 0.0   | 0.0  |
| 21UR-61210 | 1.0    | 0.0   | 0.0    | 0.0   | 0.0   | 0.0  |
| 21UR-61220 | 0.0    | 0.0   | 0.0    | 0.0   | 0.0   | 0.0  |
| 21UR-61230 | 1514.5 | 278.0 | 1142.5 | 494.0 | 149.0 | 26.0 |
| 21UR-61240 | 0.0    | 0.0   | 1.0    | 0.0   | 0.0   | 0.0  |
| 21UR-61250 | 0.0    | 0.3   | 1.0    | 0.0   | 0.0   | 0.0  |
| 21UR-61260 | 0.0    | 0.0   | 1.0    | 0.0   | 0.0   | 0.0  |
| 21UR-61270 | 0.0    | 0.0   | 0.0    | 0.0   | 0.0   | 0.0  |
| 21UR-61280 | 0.0    | 0.0   | 0.0    | 0.0   | 1.0   | 0.0  |
| 21UR-61290 | 9.0    | 0.0   | 10.0   | 0.0   | 8.0   | 4.0  |
| 21UR-6130  | 0.0    | 0.0   | 0.0    | 0.0   | 0.0   | 0.0  |
| 21UR-61300 | 1.0    | 0.0   | 0.0    | 0.0   | 4.0   | 0.0  |
| 21UR-61310 | 0.0    | 6.0   | 0.0    | 0.0   | 1.0   | 4.0  |
| 21UR-61320 | 17.5   | 1.5   | 8.0    | 5.0   | 1.0   | 0.0  |
| 21UR-61330 | 0.0    | 0.0   | 0.0    | 0.0   | 0.0   | 0.0  |
| 21UR-61340 | 0.0    | 0.0   | 1.0    | 0.0   | 0.0   | 0.0  |
| 21UR-61360 | 0.0    | 0.0   | 0.0    | 0.0   | 0.0   | 0.0  |
| 21UR-61370 | 0.0    | 1.0   | 0.0    | 0.0   | 0.0   | 0.0  |
| 21UR-61380 | 0.0    | 4.0   | 0.0    | 0.0   | 4.0   | 0.0  |
| 21UR-61390 | 16.0   | 7.0   | 16.0   | 1.0   | 13.0  | 0.0  |
| 21UR-6140  | 0.0    | 0.0   | 0.0    | 0.0   | 0.0   | 0.0  |
| 21UR-61400 | 6.0    | 0.0   | 4.0    | 1.0   | 1.0   | 0.0  |
| 21UR-61410 | 6.0    | 1.0   | 0.0    | 0.0   | 0.0   | 0.0  |
| 21UR-61420 | 0.0    | 0.0   | 0.0    | 0.0   | 0.0   | 0.0  |
| 21UR-61430 | 1.0    | 0.0   | 1.0    | 1.0   | 0.0   | 0.0  |
| 21UR-61440 | 1.0    | 0.0   | 0.0    | 0.0   | 0.0   | 0.0  |
| 21UR-61450 | 0.0    | 0.0   | 0.0    | 0.0   | 0.0   | 0.0  |
| 21UR-61460 | 0.0    | 0.0   | 0.0    | 0.0   | 0.0   | 0.0  |
| 21UR-61470 | 0.0    | 0.0   | 0.0    | 0.0   | 0.0   | 0.0  |
| 21UR-61480 | 13.0   | 1.0   | 1.0    | 1.0   | 0.0   | 0.0  |

|            |       |      |       |       |      |      |
|------------|-------|------|-------|-------|------|------|
| 21UR-61490 | 4.0   | 0.0  | 0.0   | 1.0   | 0.0  | 0.0  |
| 21UR-6150  | 0.0   | 1.0  | 1.0   | 1.0   | 0.0  | 0.0  |
| 21UR-61500 | 0.0   | 0.0  | 0.0   | 0.0   | 1.0  | 0.0  |
| 21UR-61510 | 0.0   | 0.0  | 0.0   | 0.0   | 0.0  | 0.0  |
| 21UR-61520 | 23.0  | 17.5 | 19.0  | 4.5   | 34.0 | 1.0  |
| 21UR-61530 | 4.0   | 0.0  | 0.0   | 0.0   | 1.0  | 0.0  |
| 21UR-61540 | 1.0   | 1.0  | 1.0   | 4.0   | 0.0  | 0.0  |
| 21UR-61550 | 0.0   | 0.0  | 1.0   | 0.0   | 4.0  | 0.0  |
| 21UR-61560 | 16.0  | 1.0  | 18.0  | 2.0   | 1.0  | 0.0  |
| 21UR-61580 | 0.0   | 0.0  | 0.0   | 0.0   | 0.0  | 0.0  |
| 21UR-61590 | 280.5 | 74.0 | 364.5 | 194.2 | 56.0 | 7.0  |
| 21UR-6160  | 26.0  | 12.0 | 33.0  | 8.0   | 10.0 | 2.0  |
| 21UR-61600 | 4.0   | 0.0  | 0.0   | 1.0   | 0.0  | 0.0  |
| 21UR-61610 | 0.0   | 0.0  | 0.0   | 0.0   | 1.0  | 0.0  |
| 21UR-61620 | 1.0   | 0.0  | 1.0   | 0.0   | 0.0  | 1.0  |
| 21UR-61630 | 0.0   | 10.0 | 0.0   | 0.0   | 4.0  | 0.0  |
| 21UR-61640 | 10.0  | 2.0  | 2.0   | 1.0   | 2.0  | 1.0  |
| 21UR-61650 | 0.0   | 0.0  | 0.0   | 0.0   | 0.0  | 0.0  |
| 21UR-61660 | 0.0   | 0.0  | 0.0   | 0.0   | 1.0  | 0.0  |
| 21UR-61670 | 36.0  | 14.7 | 29.0  | 3.0   | 38.0 | 8.0  |
| 21UR-61680 | 4.0   | 0.0  | 4.0   | 0.0   | 1.0  | 0.0  |
| 21UR-61690 | 1.0   | 2.0  | 1.0   | 1.0   | 0.0  | 0.0  |
| 21UR-6170  | 1.0   | 20.0 | 2.0   | 1.0   | 12.0 | 5.0  |
| 21UR-61700 | 4.0   | 0.0  | 7.0   | 2.0   | 2.0  | 0.0  |
| 21UR-61710 | 36.0  | 98.0 | 42.0  | 15.0  | 94.0 | 18.0 |
| 21UR-61720 | 0.0   | 0.0  | 0.0   | 0.0   | 0.0  | 0.0  |
| 21UR-61730 | 0.0   | 1.6  | 0.0   | 0.0   | 0.0  | 0.0  |
| 21UR-61740 | 0.0   | 0.0  | 0.0   | 0.0   | 0.0  | 0.0  |
| 21UR-61750 | 0.0   | 0.0  | 0.0   | 0.0   | 0.0  | 0.0  |
| 21UR-61760 | 0.0   | 0.0  | 0.0   | 1.0   | 3.0  | 0.0  |
| 21UR-61770 | 0.0   | 1.0  | 0.0   | 1.0   | 0.0  | 0.0  |
| 21UR-61780 | 1.0   | 3.0  | 4.0   | 0.0   | 0.0  | 2.0  |
| 21UR-61790 | 11.0  | 16.3 | 22.0  | 3.0   | 23.0 | 4.0  |
| 21UR-6180  | 1.0   | 0.0  | 0.0   | 0.0   | 0.0  | 0.0  |
| 21UR-61800 | 0.0   | 0.0  | 0.0   | 0.0   | 0.0  | 0.0  |
| 21UR-61810 | 0.0   | 0.0  | 0.0   | 0.0   | 0.0  | 0.0  |
| 21UR-61820 | 1.0   | 0.5  | 1.0   | 0.0   | 0.0  | 0.0  |
| 21UR-61830 | 14.7  | 3.1  | 12.0  | 3.0   | 0.0  | 0.0  |
| 21UR-61840 | 0.0   | 0.0  | 0.0   | 0.0   | 0.0  | 0.0  |
| 21UR-61850 | 0.0   | 0.0  | 0.0   | 0.0   | 0.0  | 0.0  |
| 21UR-61860 | 6.0   | 1.0  | 2.0   | 4.0   | 11.5 | 1.0  |
| 21UR-61870 | 10.0  | 7.0  | 22.0  | 10.0  | 4.0  | 1.0  |
| 21UR-61880 | 9.0   | 28.0 | 13.0  | 1.0   | 10.7 | 0.0  |
| 21UR-61890 | 0.0   | 0.0  | 0.0   | 0.0   | 0.0  | 0.0  |
| 21UR-6190  | 1.0   | 2.0  | 0.0   | 0.0   | 1.0  | 1.0  |
| 21UR-61900 | 0.0   | 0.0  | 0.0   | 0.0   | 4.0  | 0.0  |
| 21UR-61910 | 0.0   | 0.1  | 0.0   | 0.0   | 1.0  | 0.1  |
| 21UR-61920 | 180.0 | 39.0 | 147.2 | 70.0  | 44.0 | 3.0  |
| 21UR-61930 | 55.0  | 15.0 | 33.0  | 11.0  | 31.0 | 0.0  |
| 21UR-61940 | 3.0   | 0.0  | 4.0   | 1.0   | 0.0  | 1.0  |
| 21UR-61950 | 3.5   | 1.0  | 6.0   | 1.0   | 0.0  | 0.0  |



|            |       |       |       |       |       |      |
|------------|-------|-------|-------|-------|-------|------|
| 21UR-61960 | 0.0   | 0.0   | 0.0   | 0.0   | 0.0   | 0.0  |
| 21UR-61970 | 28.0  | 0.0   | 25.0  | 6.0   | 0.0   | 0.0  |
| 21UR-61980 | 23.0  | 0.0   | 11.0  | 1.0   | 0.0   | 0.0  |
| 21UR-61990 | 1.0   | 0.0   | 0.0   | 0.0   | 0.0   | 0.0  |
| 21UR-620   | 6.0   | 1.0   | 5.0   | 0.0   | 1.0   | 0.0  |
| 21UR-6200  | 6.0   | 5.0   | 6.0   | 0.0   | 0.0   | 6.0  |
| 21UR-62000 | 2.0   | 0.0   | 1.0   | 1.0   | 0.0   | 0.0  |
| 21UR-62010 | 0.0   | 0.0   | 0.0   | 0.0   | 0.0   | 0.0  |
| 21UR-62020 | 294.0 | 392.5 | 285.0 | 114.0 | 272.0 | 18.0 |
| 21UR-62030 | 10.0  | 0.0   | 14.0  | 0.0   | 0.0   | 0.0  |
| 21UR-62040 | 39.0  | 2.0   | 20.0  | 15.0  | 4.0   | 2.0  |
| 21UR-62050 | 0.0   | 0.0   | 0.0   | 0.0   | 0.0   | 0.0  |
| 21UR-62060 | 0.0   | 0.0   | 0.0   | 0.0   | 0.0   | 0.0  |
| 21UR-62070 | 26.0  | 4.0   | 33.0  | 20.0  | 1.0   | 1.0  |
| 21UR-62080 | 1.0   | 0.0   | 0.0   | 0.0   | 0.0   | 0.0  |
| 21UR-62090 | 0.0   | 0.0   | 1.0   | 0.0   | 0.0   | 0.0  |
| 21UR-6210  | 49.0  | 50.0  | 27.0  | 11.0  | 12.0  | 0.0  |
| 21UR-62100 | 6.0   | 1.0   | 1.0   | 0.0   | 0.0   | 0.0  |
| 21UR-62110 | 0.0   | 1.0   | 0.0   | 0.0   | 1.0   | 0.0  |
| 21UR-62120 | 20.0  | 9.5   | 21.5  | 2.0   | 10.0  | 1.0  |
| 21UR-62130 | 2.5   | 9.0   | 7.5   | 0.0   | 4.0   | 1.0  |
| 21UR-62140 | 1.0   | 1.0   | 0.0   | 6.0   | 0.0   | 0.0  |
| 21UR-62150 | 0.0   | 0.0   | 0.0   | 0.0   | 0.0   | 0.0  |
| 21UR-62160 | 0.0   | 1.0   | 0.0   | 0.0   | 0.0   | 0.0  |
| 21UR-62170 | 1.0   | 0.0   | 4.0   | 0.0   | 0.0   | 1.0  |
| 21UR-62180 | 0.0   | 0.0   | 0.0   | 0.0   | 0.0   | 0.0  |
| 21UR-62190 | 14.0  | 1.0   | 16.0  | 8.0   | 2.0   | 0.0  |
| 21UR-6220  | 0.0   | 0.0   | 0.0   | 0.0   | 0.0   | 0.0  |
| 21UR-62210 | 16.0  | 2.0   | 6.0   | 1.0   | 7.0   | 1.0  |
| 21UR-62220 | 0.0   | 0.0   | 0.0   | 0.0   | 0.0   | 0.0  |
| 21UR-62230 | 0.0   | 1.0   | 0.0   | 0.0   | 0.0   | 0.0  |
| 21UR-62240 | 1.0   | 7.0   | 1.0   | 0.0   | 1.0   | 1.0  |
| 21UR-62250 | 0.0   | 0.0   | 0.0   | 0.0   | 0.0   | 0.0  |
| 21UR-62270 | 0.0   | 0.0   | 0.0   | 0.0   | 1.0   | 0.0  |
| 21UR-62280 | 8.0   | 0.0   | 2.0   | 2.0   | 0.0   | 0.0  |
| 21UR-62290 | 1.0   | 0.0   | 0.0   | 0.0   | 0.0   | 0.0  |
| 21UR-6230  | 0.0   | 0.0   | 0.0   | 0.0   | 1.0   | 0.0  |
| 21UR-62300 | 39.0  | 49.7  | 25.0  | 8.0   | 10.0  | 0.0  |
| 21UR-62310 | 0.0   | 1.0   | 1.0   | 0.0   | 0.0   | 0.0  |
| 21UR-62320 | 0.0   | 0.0   | 0.0   | 0.0   | 0.0   | 0.0  |
| 21UR-62330 | 6.0   | 1.0   | 8.0   | 1.0   | 0.0   | 1.0  |
| 21UR-62340 | 0.0   | 0.0   | 0.0   | 0.0   | 0.0   | 0.0  |
| 21UR-62350 | 1.0   | 0.0   | 0.0   | 0.0   | 0.0   | 0.0  |
| 21UR-62360 | 0.0   | 0.0   | 1.0   | 0.0   | 0.0   | 0.0  |
| 21UR-62370 | 0.0   | 0.0   | 0.0   | 0.0   | 0.0   | 0.0  |
| 21UR-62380 | 6.0   | 20.0  | 0.0   | 0.0   | 26.3  | 0.0  |
| 21UR-62390 | 1.0   | 0.0   | 0.0   | 0.0   | 0.0   | 0.0  |
| 21UR-6240  | 1.0   | 16.0  | 12.0  | 8.0   | 1.0   | 4.0  |
| 21UR-62400 | 4.0   | 3.0   | 17.0  | 3.0   | 2.0   | 0.0  |
| 21UR-62410 | 58.0  | 26.0  | 64.0  | 26.0  | 26.0  | 6.0  |
| 21UR-62420 | 6.0   | 0.0   | 1.0   | 0.0   | 0.0   | 0.0  |

|            |      |      |      |     |      |     |
|------------|------|------|------|-----|------|-----|
| 21UR-62430 | 12.0 | 0.0  | 8.0  | 4.0 | 2.0  | 0.0 |
| 21UR-62440 | 0.0  | 0.1  | 0.0  | 0.0 | 0.0  | 1.0 |
| 21UR-62450 | 1.0  | 3.0  | 1.0  | 0.0 | 8.0  | 1.0 |
| 21UR-62460 | 0.0  | 1.0  | 0.0  | 0.0 | 0.0  | 0.0 |
| 21UR-62470 | 0.0  | 0.0  | 0.0  | 0.0 | 0.0  | 0.0 |
| 21UR-62480 | 0.0  | 0.0  | 0.0  | 0.0 | 0.0  | 0.0 |
| 21UR-62490 | 3.0  | 0.0  | 10.0 | 1.0 | 0.0  | 0.0 |
| 21UR-6250  | 0.0  | 0.0  | 0.0  | 0.0 | 0.0  | 0.0 |
| 21UR-62500 | 0.0  | 0.0  | 0.0  | 0.0 | 0.0  | 0.0 |
| 21UR-62510 | 26.0 | 2.0  | 12.0 | 6.0 | 1.0  | 0.1 |
| 21UR-62520 | 0.0  | 0.0  | 0.0  | 0.0 | 0.0  | 0.0 |
| 21UR-62530 | 0.0  | 0.0  | 0.0  | 0.0 | 0.0  | 0.0 |
| 21UR-62540 | 6.0  | 1.0  | 1.0  | 0.0 | 4.0  | 0.0 |
| 21UR-62550 | 0.0  | 0.0  | 0.0  | 0.0 | 1.0  | 0.0 |
| 21UR-62560 | 0.0  | 0.0  | 0.0  | 0.0 | 0.0  | 1.0 |
| 21UR-62570 | 0.0  | 2.0  | 0.0  | 0.0 | 0.0  | 0.0 |
| 21UR-62580 | 29.0 | 2.0  | 20.0 | 3.0 | 4.3  | 0.0 |
| 21UR-62590 | 1.0  | 0.0  | 6.0  | 0.0 | 1.0  | 0.0 |
| 21UR-6260  | 3.0  | 9.0  | 2.0  | 3.0 | 0.0  | 2.0 |
| 21UR-62610 | 0.0  | 0.0  | 1.0  | 0.0 | 0.0  | 0.0 |
| 21UR-62620 | 19.0 | 8.0  | 10.0 | 0.0 | 1.0  | 1.0 |
| 21UR-62630 | 0.0  | 0.0  | 0.0  | 0.0 | 0.0  | 0.0 |
| 21UR-62640 | 0.0  | 0.0  | 0.0  | 0.0 | 0.0  | 0.0 |
| 21UR-62650 | 0.0  | 0.0  | 4.0  | 1.0 | 0.0  | 0.0 |
| 21UR-62660 | 6.0  | 0.0  | 8.0  | 0.0 | 0.0  | 0.0 |
| 21UR-62670 | 0.0  | 0.0  | 1.0  | 0.0 | 0.0  | 0.0 |
| 21UR-62680 | 18.0 | 1.0  | 10.0 | 1.0 | 5.1  | 0.0 |
| 21UR-62690 | 0.0  | 1.0  | 0.0  | 0.0 | 1.0  | 0.0 |
| 21UR-6270  | 0.0  | 0.0  | 0.0  | 0.0 | 0.0  | 0.0 |
| 21UR-62700 | 0.0  | 0.0  | 0.0  | 0.0 | 0.0  | 0.0 |
| 21UR-62710 | 0.0  | 0.0  | 0.0  | 0.0 | 1.0  | 0.0 |
| 21UR-62720 | 8.0  | 1.0  | 17.0 | 1.0 | 2.0  | 0.0 |
| 21UR-62730 | 0.0  | 5.0  | 1.0  | 0.0 | 4.0  | 0.0 |
| 21UR-62740 | 19.0 | 14.0 | 14.0 | 6.0 | 10.0 | 1.0 |
| 21UR-62750 | 18.0 | 1.0  | 26.0 | 8.0 | 2.0  | 0.0 |
| 21UR-62760 | 0.0  | 0.0  | 0.0  | 0.0 | 0.0  | 0.0 |
| 21UR-62770 | 1.0  | 0.0  | 8.0  | 0.0 | 0.0  | 0.0 |
| 21UR-62780 | 0.0  | 6.0  | 0.0  | 0.0 | 1.0  | 1.0 |
| 21UR-62790 | 0.0  | 0.0  | 0.0  | 0.0 | 0.0  | 0.0 |
| 21UR-6280  | 1.0  | 8.0  | 1.0  | 0.0 | 0.0  | 0.0 |
| 21UR-62800 | 0.0  | 0.0  | 0.0  | 0.0 | 0.0  | 0.0 |
| 21UR-62810 | 0.0  | 0.0  | 0.0  | 0.0 | 0.0  | 0.0 |
| 21UR-62820 | 2.0  | 1.0  | 4.0  | 2.0 | 0.2  | 0.0 |
| 21UR-62830 | 0.0  | 0.0  | 0.0  | 0.0 | 0.0  | 0.0 |
| 21UR-62840 | 1.0  | 1.0  | 1.0  | 0.0 | 4.0  | 0.0 |
| 21UR-62850 | 0.0  | 0.0  | 0.0  | 0.0 | 0.0  | 0.0 |
| 21UR-62860 | 4.0  | 0.0  | 1.0  | 0.0 | 1.0  | 0.0 |
| 21UR-62870 | 1.0  | 0.0  | 0.0  | 0.0 | 6.0  | 0.0 |
| 21UR-62880 | 0.0  | 0.0  | 1.0  | 0.0 | 0.0  | 0.0 |
| 21UR-62890 | 0.0  | 0.0  | 0.0  | 0.0 | 0.0  | 0.0 |
| 21UR-6290  | 4.0  | 1.0  | 0.0  | 0.0 | 0.0  | 0.0 |

|            |      |      |      |      |      |      |
|------------|------|------|------|------|------|------|
| 21UR-62900 | 25.0 | 13.0 | 30.0 | 20.0 | 8.0  | 5.0  |
| 21UR-62910 | 0.0  | 0.0  | 0.0  | 0.0  | 0.0  | 0.0  |
| 21UR-62920 | 1.0  | 0.0  | 0.0  | 0.0  | 0.0  | 0.0  |
| 21UR-62930 | 0.0  | 0.0  | 0.0  | 0.0  | 1.0  | 0.0  |
| 21UR-62940 | 0.0  | 3.0  | 4.0  | 0.0  | 4.0  | 0.0  |
| 21UR-62950 | 2.0  | 1.0  | 0.0  | 0.0  | 0.0  | 0.0  |
| 21UR-62960 | 6.0  | 0.0  | 1.0  | 0.0  | 0.0  | 0.0  |
| 21UR-62970 | 0.0  | 0.0  | 0.0  | 0.0  | 0.0  | 0.0  |
| 21UR-62980 | 4.0  | 4.0  | 10.0 | 0.0  | 0.0  | 0.0  |
| 21UR-62990 | 10.0 | 6.0  | 14.0 | 5.0  | 6.0  | 1.0  |
| 21UR-630   | 1.0  | 0.0  | 4.0  | 0.0  | 0.0  | 0.0  |
| 21UR-6300  | 0.0  | 0.0  | 0.0  | 0.0  | 0.0  | 0.0  |
| 21UR-63000 | 0.0  | 0.0  | 0.0  | 0.0  | 0.0  | 0.0  |
| 21UR-63010 | 12.0 | 0.0  | 12.0 | 6.0  | 9.0  | 0.0  |
| 21UR-63020 | 1.0  | 0.0  | 1.0  | 0.0  | 2.0  | 0.0  |
| 21UR-63030 | 0.0  | 0.0  | 0.0  | 0.0  | 0.0  | 0.0  |
| 21UR-63040 | 1.0  | 1.0  | 1.0  | 1.0  | 0.0  | 0.0  |
| 21UR-63050 | 0.0  | 0.0  | 0.0  | 0.0  | 0.0  | 0.0  |
| 21UR-63060 | 0.0  | 0.0  | 0.0  | 0.0  | 0.0  | 1.0  |
| 21UR-63070 | 12.0 | 30.0 | 13.0 | 2.5  | 29.0 | 15.0 |
| 21UR-63080 | 16.0 | 1.0  | 1.0  | 10.0 | 1.0  | 0.0  |
| 21UR-63090 | 0.0  | 0.0  | 0.0  | 0.0  | 0.0  | 0.0  |
| 21UR-6310  | 4.0  | 1.0  | 1.0  | 0.0  | 0.0  | 0.0  |
| 21UR-63100 | 0.0  | 0.0  | 0.0  | 0.0  | 0.0  | 0.0  |
| 21UR-63110 | 0.0  | 0.0  | 0.0  | 0.0  | 0.0  | 0.0  |
| 21UR-63120 | 0.0  | 0.0  | 1.0  | 0.0  | 0.0  | 0.0  |
| 21UR-63130 | 0.0  | 0.0  | 1.0  | 0.0  | 0.0  | 0.0  |
| 21UR-63140 | 0.0  | 0.0  | 0.0  | 0.0  | 0.0  | 0.0  |
| 21UR-63150 | 4.0  | 0.0  | 0.0  | 0.0  | 0.0  | 0.0  |
| 21UR-63160 | 0.0  | 0.0  | 0.0  | 0.0  | 0.0  | 0.0  |
| 21UR-63170 | 0.0  | 0.0  | 0.0  | 0.0  | 0.0  | 0.0  |
| 21UR-63180 | 55.0 | 77.0 | 38.0 | 9.0  | 25.0 | 7.0  |
| 21UR-63190 | 8.0  | 0.0  | 9.0  | 4.0  | 0.0  | 1.0  |
| 21UR-6320  | 70.0 | 0.0  | 48.0 | 8.0  | 17.0 | 0.0  |
| 21UR-63200 | 0.0  | 0.0  | 0.0  | 0.0  | 0.0  | 0.0  |
| 21UR-63210 | 0.0  | 0.0  | 6.0  | 4.0  | 0.0  | 0.0  |
| 21UR-63220 | 0.0  | 0.0  | 0.0  | 0.0  | 0.0  | 0.0  |
| 21UR-63240 | 1.0  | 0.0  | 0.0  | 0.0  | 0.0  | 0.0  |
| 21UR-63250 | 0.0  | 0.0  | 4.0  | 0.0  | 0.0  | 0.0  |
| 21UR-63260 | 0.0  | 1.0  | 0.0  | 0.0  | 0.0  | 0.0  |
| 21UR-63270 | 3.0  | 23.0 | 5.0  | 3.0  | 20.0 | 6.0  |
| 21UR-63280 | 22.0 | 13.0 | 24.0 | 1.0  | 9.0  | 1.0  |
| 21UR-63290 | 0.0  | 0.0  | 0.0  | 0.0  | 0.0  | 0.0  |
| 21UR-6330  | 11.0 | 0.0  | 6.0  | 1.0  | 0.0  | 0.0  |
| 21UR-63300 | 0.0  | 1.0  | 0.0  | 0.0  | 0.0  | 0.0  |
| 21UR-63310 | 0.0  | 0.0  | 0.0  | 0.0  | 0.0  | 0.0  |
| 21UR-63320 | 0.0  | 0.0  | 0.0  | 0.0  | 0.0  | 0.0  |
| 21UR-63330 | 0.0  | 0.0  | 1.0  | 0.0  | 0.0  | 1.0  |
| 21UR-63340 | 0.0  | 0.0  | 0.0  | 0.0  | 0.0  | 0.0  |
| 21UR-63350 | 0.0  | 0.0  | 0.0  | 0.0  | 0.0  | 0.0  |
| 21UR-63360 | 0.0  | 1.0  | 0.0  | 0.0  | 0.0  | 0.0  |

|            |       |       |       |       |       |     |
|------------|-------|-------|-------|-------|-------|-----|
| 21UR-63370 | 0.0   | 0.0   | 0.0   | 0.0   | 0.0   | 0.0 |
| 21UR-63380 | 0.0   | 0.0   | 0.0   | 0.0   | 0.0   | 0.0 |
| 21UR-63390 | 0.0   | 0.0   | 0.0   | 0.0   | 0.0   | 0.0 |
| 21UR-6340  | 1.0   | 2.0   | 2.0   | 0.0   | 1.0   | 0.0 |
| 21UR-63400 | 0.0   | 0.0   | 1.0   | 0.0   | 0.0   | 0.0 |
| 21UR-63410 | 5.0   | 6.0   | 1.0   | 2.0   | 19.0  | 0.0 |
| 21UR-63420 | 0.0   | 0.0   | 0.0   | 0.0   | 0.0   | 0.0 |
| 21UR-63430 | 0.0   | 0.0   | 0.0   | 0.0   | 0.0   | 0.0 |
| 21UR-63440 | 0.0   | 0.0   | 0.0   | 0.0   | 0.0   | 0.0 |
| 21UR-63450 | 25.0  | 8.0   | 16.0  | 4.0   | 50.0  | 0.0 |
| 21UR-63460 | 0.0   | 0.2   | 0.0   | 0.0   | 0.0   | 0.0 |
| 21UR-63470 | 1.0   | 1.0   | 4.0   | 0.0   | 5.0   | 0.0 |
| 21UR-63480 | 0.0   | 0.0   | 0.0   | 0.0   | 0.0   | 0.0 |
| 21UR-63490 | 0.0   | 0.0   | 1.0   | 0.0   | 0.0   | 0.0 |
| 21UR-6350  | 33.0  | 5.0   | 28.0  | 3.0   | 6.0   | 0.0 |
| 21UR-63500 | 1.0   | 4.1   | 0.0   | 1.0   | 1.0   | 0.0 |
| 21UR-63510 | 0.0   | 0.0   | 0.0   | 0.0   | 0.0   | 0.0 |
| 21UR-63520 | 4.0   | 3.1   | 1.0   | 0.0   | 4.0   | 0.0 |
| 21UR-63530 | 10.0  | 0.0   | 3.0   | 0.0   | 0.0   | 0.0 |
| 21UR-63540 | 1.0   | 0.0   | 6.0   | 0.0   | 4.0   | 0.0 |
| 21UR-63550 | 0.0   | 0.0   | 0.0   | 0.0   | 0.0   | 0.0 |
| 21UR-63560 | 3.5   | 0.0   | 4.0   | 0.0   | 5.0   | 0.0 |
| 21UR-63570 | 0.0   | 0.0   | 0.0   | 0.0   | 1.0   | 0.0 |
| 21UR-63580 | 8.0   | 0.0   | 9.0   | 1.0   | 0.0   | 0.0 |
| 21UR-63590 | 12.0  | 0.0   | 3.0   | 1.0   | 0.0   | 0.0 |
| 21UR-6360  | 0.0   | 1.0   | 3.0   | 0.0   | 0.0   | 0.0 |
| 21UR-63600 | 0.0   | 6.0   | 1.0   | 1.0   | 1.0   | 1.0 |
| 21UR-63610 | 1.0   | 0.0   | 0.0   | 0.0   | 0.0   | 0.0 |
| 21UR-63620 | 3.5   | 0.0   | 4.0   | 0.0   | 1.0   | 0.0 |
| 21UR-63630 | 0.0   | 0.0   | 0.0   | 0.0   | 1.0   | 0.0 |
| 21UR-63640 | 671.0 | 109.0 | 377.0 | 312.0 | 111.0 | 7.0 |
| 21UR-63650 | 0.0   | 0.0   | 0.0   | 0.0   | 0.0   | 0.0 |
| 21UR-63660 | 12.0  | 6.0   | 6.0   | 6.0   | 7.0   | 0.0 |
| 21UR-63670 | 32.0  | 8.0   | 27.0  | 13.0  | 8.0   | 0.0 |
| 21UR-63680 | 0.0   | 1.0   | 0.0   | 0.0   | 0.0   | 0.0 |
| 21UR-63690 | 0.0   | 0.0   | 0.0   | 0.0   | 0.0   | 0.0 |
| 21UR-6370  | 0.0   | 0.0   | 4.0   | 1.0   | 1.0   | 0.0 |
| 21UR-63700 | 0.0   | 1.0   | 0.0   | 0.0   | 0.0   | 0.0 |
| 21UR-63710 | 1.0   | 0.0   | 0.0   | 0.0   | 0.0   | 0.0 |
| 21UR-63720 | 0.0   | 0.0   | 0.0   | 0.0   | 0.0   | 0.0 |
| 21UR-63730 | 0.0   | 1.0   | 2.0   | 0.0   | 4.0   | 0.0 |
| 21UR-63740 | 3.0   | 0.0   | 6.0   | 0.0   | 1.0   | 0.0 |
| 21UR-63750 | 0.0   | 0.0   | 0.0   | 0.0   | 0.0   | 0.0 |
| 21UR-63760 | 0.0   | 0.0   | 1.0   | 0.0   | 0.0   | 0.0 |
| 21UR-63770 | 1.0   | 0.0   | 0.0   | 0.0   | 7.0   | 0.0 |
| 21UR-63780 | 1.0   | 1.0   | 1.0   | 4.0   | 1.0   | 0.0 |
| 21UR-63790 | 29.0  | 5.0   | 33.0  | 6.0   | 21.0  | 0.0 |
| 21UR-6380  | 1.0   | 6.0   | 0.0   | 0.0   | 3.0   | 1.0 |
| 21UR-63800 | 1.0   | 0.0   | 0.0   | 0.0   | 0.0   | 0.0 |
| 21UR-63810 | 1.0   | 3.0   | 4.0   | 4.0   | 0.0   | 0.0 |
| 21UR-63820 | 0.0   | 0.0   | 0.0   | 0.0   | 0.0   | 0.0 |

|            |       |       |       |       |      |      |
|------------|-------|-------|-------|-------|------|------|
| 21UR-63830 | 1.0   | 0.0   | 0.0   | 0.0   | 0.0  | 0.0  |
| 21UR-63840 | 0.0   | 0.0   | 0.0   | 0.0   | 0.0  | 0.0  |
| 21UR-63850 | 0.0   | 0.0   | 2.0   | 0.0   | 0.0  | 0.0  |
| 21UR-63860 | 1.0   | 1.0   | 1.5   | 1.0   | 0.0  | 0.0  |
| 21UR-63870 | 63.0  | 2.0   | 51.0  | 9.0   | 12.0 | 0.0  |
| 21UR-63880 | 20.0  | 3.0   | 9.0   | 4.0   | 3.0  | 1.0  |
| 21UR-63890 | 0.0   | 0.2   | 0.0   | 0.0   | 8.0  | 0.0  |
| 21UR-6390  | 0.0   | 1.0   | 0.0   | 0.0   | 3.0  | 4.0  |
| 21UR-63900 | 4.0   | 1.0   | 12.0  | 0.0   | 0.0  | 1.0  |
| 21UR-63910 | 0.0   | 1.0   | 0.0   | 0.0   | 0.0  | 0.0  |
| 21UR-63920 | 24.0  | 22.0  | 31.0  | 8.0   | 28.0 | 3.0  |
| 21UR-63930 | 0.0   | 0.0   | 0.0   | 0.0   | 0.0  | 0.0  |
| 21UR-63940 | 14.0  | 1.0   | 16.0  | 4.0   | 0.0  | 1.0  |
| 21UR-63950 | 0.0   | 0.0   | 1.0   | 0.0   | 0.0  | 0.0  |
| 21UR-63960 | 1.0   | 0.0   | 0.0   | 0.0   | 0.0  | 0.0  |
| 21UR-63970 | 0.0   | 0.0   | 0.0   | 0.0   | 0.0  | 0.0  |
| 21UR-63980 | 0.0   | 0.0   | 0.0   | 0.0   | 0.0  | 0.0  |
| 21UR-63990 | 0.0   | 2.0   | 0.0   | 0.0   | 2.0  | 0.0  |
| 21UR-640   | 0.0   | 0.0   | 1.0   | 0.0   | 4.0  | 0.0  |
| 21UR-6400  | 3.0   | 2.0   | 6.0   | 0.0   | 8.0  | 0.0  |
| 21UR-64000 | 0.0   | 0.0   | 0.0   | 0.0   | 0.0  | 0.0  |
| 21UR-64010 | 0.0   | 0.0   | 1.0   | 0.0   | 4.0  | 0.0  |
| 21UR-64020 | 4.0   | 0.0   | 1.0   | 0.0   | 0.0  | 0.0  |
| 21UR-64030 | 211.0 | 9.0   | 254.5 | 104.0 | 86.0 | 0.0  |
| 21UR-64040 | 1.0   | 0.0   | 0.0   | 0.0   | 0.0  | 0.0  |
| 21UR-64050 | 23.0  | 33.0  | 29.0  | 9.0   | 53.0 | 0.0  |
| 21UR-64060 | 0.0   | 1.0   | 0.0   | 1.0   | 1.0  | 0.0  |
| 21UR-64070 | 0.0   | 0.0   | 1.0   | 0.0   | 0.0  | 1.0  |
| 21UR-64080 | 0.0   | 4.0   | 6.0   | 0.0   | 1.0  | 0.0  |
| 21UR-64090 | 186.0 | 21.0  | 122.0 | 35.0  | 8.0  | 1.0  |
| 21UR-6410  | 50.0  | 103.0 | 55.0  | 18.0  | 81.0 | 9.0  |
| 21UR-64100 | 0.0   | 0.0   | 0.0   | 0.0   | 0.0  | 0.0  |
| 21UR-64110 | 1.0   | 0.0   | 0.0   | 0.0   | 4.0  | 0.0  |
| 21UR-64120 | 0.0   | 0.0   | 0.0   | 0.0   | 0.0  | 0.0  |
| 21UR-64130 | 15.0  | 0.0   | 13.0  | 1.0   | 5.0  | 0.0  |
| 21UR-64140 | 0.0   | 0.0   | 0.0   | 0.0   | 0.0  | 0.0  |
| 21UR-64150 | 0.0   | 0.0   | 1.0   | 0.0   | 4.0  | 0.0  |
| 21UR-64160 | 43.0  | 10.0  | 47.0  | 19.0  | 3.0  | 0.0  |
| 21UR-64170 | 46.5  | 3.0   | 47.0  | 20.0  | 16.0 | 0.0  |
| 21UR-64180 | 0.0   | 0.0   | 0.0   | 0.0   | 0.0  | 0.0  |
| 21UR-64190 | 10.0  | 9.0   | 6.0   | 4.0   | 22.0 | 1.0  |
| 21UR-6420  | 0.0   | 0.0   | 0.0   | 0.0   | 0.0  | 0.0  |
| 21UR-64200 | 12.0  | 4.0   | 10.0  | 4.0   | 0.0  | 2.0  |
| 21UR-64210 | 21.0  | 4.0   | 10.0  | 6.0   | 13.5 | 0.0  |
| 21UR-64220 | 1.0   | 0.0   | 1.0   | 1.0   | 0.0  | 0.0  |
| 21UR-64230 | 4.0   | 0.0   | 0.0   | 1.0   | 0.0  | 0.0  |
| 21UR-64240 | 173.0 | 18.0  | 89.2  | 45.7  | 11.8 | 12.0 |
| 21UR-64250 | 0.0   | 1.0   | 0.0   | 0.0   | 0.0  | 0.0  |
| 21UR-64260 | 0.0   | 0.0   | 0.0   | 0.0   | 0.0  | 0.0  |
| 21UR-64270 | 41.5  | 8.0   | 29.0  | 4.0   | 13.0 | 0.0  |
| 21UR-64280 | 0.0   | 0.0   | 0.0   | 0.0   | 0.0  | 0.0  |

|            |       |      |       |       |       |      |
|------------|-------|------|-------|-------|-------|------|
| 21UR-64290 | 1.0   | 0.0  | 4.0   | 0.0   | 0.0   | 1.0  |
| 21UR-6430  | 0.0   | 0.0  | 0.0   | 0.0   | 0.0   | 0.0  |
| 21UR-64300 | 12.0  | 22.1 | 10.0  | 6.0   | 27.0  | 2.0  |
| 21UR-64310 | 12.0  | 4.0  | 12.0  | 1.0   | 4.0   | 0.0  |
| 21UR-64320 | 303.0 | 55.0 | 241.5 | 208.0 | 203.0 | 10.0 |
| 21UR-64330 | 2.0   | 0.0  | 1.0   | 1.0   | 1.0   | 1.0  |
| 21UR-64340 | 0.0   | 1.0  | 0.0   | 0.0   | 1.0   | 0.0  |
| 21UR-64350 | 4.0   | 1.5  | 0.0   | 0.0   | 0.0   | 1.0  |
| 21UR-64360 | 0.0   | 0.0  | 0.0   | 0.0   | 0.0   | 0.0  |
| 21UR-64370 | 0.0   | 1.0  | 0.0   | 0.0   | 0.0   | 0.0  |
| 21UR-64380 | 0.0   | 0.0  | 2.0   | 0.0   | 0.0   | 0.0  |
| 21UR-64390 | 0.0   | 1.0  | 0.0   | 0.0   | 1.0   | 1.0  |
| 21UR-6440  | 0.0   | 0.0  | 0.0   | 0.0   | 0.0   | 0.0  |
| 21UR-64400 | 0.0   | 0.0  | 0.0   | 0.0   | 0.0   | 0.0  |
| 21UR-64410 | 0.0   | 0.0  | 0.0   | 0.0   | 1.0   | 0.0  |
| 21UR-64420 | 5.0   | 0.0  | 4.0   | 4.0   | 5.0   | 0.0  |
| 21UR-64430 | 40.0  | 6.0  | 24.0  | 6.0   | 1.0   | 1.0  |
| 21UR-64440 | 0.0   | 0.0  | 0.0   | 0.0   | 0.0   | 0.0  |
| 21UR-64450 | 0.0   | 1.0  | 0.0   | 0.0   | 0.0   | 0.0  |
| 21UR-64460 | 9.0   | 2.0  | 4.0   | 1.0   | 0.0   | 0.0  |
| 21UR-64470 | 0.0   | 0.0  | 4.0   | 0.0   | 1.0   | 1.0  |
| 21UR-64480 | 0.0   | 1.0  | 1.0   | 0.0   | 0.0   | 0.0  |
| 21UR-64490 | 0.0   | 0.0  | 1.0   | 0.0   | 0.0   | 0.0  |
| 21UR-6450  | 0.0   | 0.0  | 1.0   | 0.0   | 1.0   | 0.0  |
| 21UR-64500 | 72.0  | 8.0  | 37.0  | 14.0  | 9.0   | 0.0  |
| 21UR-64510 | 0.0   | 0.0  | 0.0   | 0.0   | 0.0   | 0.0  |
| 21UR-64520 | 6.0   | 3.0  | 1.0   | 1.0   | 3.0   | 1.0  |
| 21UR-64530 | 39.0  | 9.1  | 24.0  | 11.0  | 4.0   | 0.0  |
| 21UR-64540 | 0.0   | 0.0  | 0.0   | 0.0   | 0.0   | 0.0  |
| 21UR-64550 | 0.0   | 0.0  | 0.0   | 0.0   | 0.0   | 0.0  |
| 21UR-64560 | 0.0   | 1.0  | 1.0   | 0.0   | 1.0   | 0.0  |
| 21UR-64570 | 0.0   | 0.0  | 0.0   | 0.0   | 0.0   | 0.0  |
| 21UR-64580 | 0.0   | 0.0  | 0.0   | 0.0   | 0.0   | 0.0  |
| 21UR-64590 | 1.0   | 0.0  | 0.0   | 0.0   | 0.0   | 0.0  |
| 21UR-6460  | 0.0   | 0.0  | 0.0   | 0.0   | 0.0   | 0.0  |
| 21UR-64600 | 0.0   | 0.0  | 0.0   | 0.0   | 0.0   | 0.0  |
| 21UR-64610 | 4.0   | 1.0  | 6.0   | 0.0   | 0.0   | 0.0  |
| 21UR-64620 | 1.0   | 0.0  | 1.0   | 0.0   | 0.0   | 0.0  |
| 21UR-64630 | 0.0   | 1.0  | 0.0   | 0.0   | 4.0   | 0.0  |
| 21UR-64640 | 12.0  | 0.0  | 1.0   | 4.0   | 0.0   | 0.0  |
| 21UR-64650 | 4.0   | 1.0  | 4.0   | 0.0   | 1.0   | 0.0  |
| 21UR-64660 | 12.0  | 0.0  | 6.0   | 0.0   | 6.0   | 1.0  |
| 21UR-64670 | 0.0   | 0.0  | 0.0   | 0.0   | 0.0   | 0.0  |
| 21UR-64680 | 50.0  | 7.0  | 31.0  | 23.0  | 15.0  | 0.0  |
| 21UR-64690 | 0.0   | 0.0  | 0.0   | 0.0   | 0.0   | 0.0  |
| 21UR-6470  | 0.0   | 0.0  | 0.0   | 0.0   | 0.0   | 0.0  |
| 21UR-64700 | 2.3   | 0.0  | 0.0   | 0.0   | 0.0   | 0.0  |
| 21UR-64710 | 0.0   | 0.0  | 0.0   | 0.0   | 0.0   | 0.0  |
| 21UR-64720 | 1.0   | 0.0  | 1.0   | 0.0   | 0.0   | 0.0  |
| 21UR-64730 | 4.0   | 1.0  | 0.0   | 0.0   | 4.0   | 0.0  |
| 21UR-64740 | 0.0   | 0.0  | 0.0   | 0.0   | 0.0   | 0.0  |

|            |       |       |       |       |       |      |
|------------|-------|-------|-------|-------|-------|------|
| 21UR-64750 | 7.0   | 1.0   | 1.0   | 1.0   | 1.0   | 0.0  |
| 21UR-64760 | 12.0  | 4.0   | 8.0   | 1.0   | 0.0   | 0.0  |
| 21UR-64770 | 0.0   | 1.0   | 1.0   | 0.0   | 1.0   | 1.0  |
| 21UR-64780 | 0.0   | 0.0   | 0.0   | 0.0   | 0.0   | 0.0  |
| 21UR-64790 | 1.0   | 1.0   | 1.0   | 0.0   | 9.0   | 2.0  |
| 21UR-6480  | 84.0  | 208.7 | 66.0  | 43.0  | 216.0 | 20.0 |
| 21UR-64800 | 6.0   | 1.0   | 8.0   | 1.0   | 1.0   | 1.0  |
| 21UR-64810 | 0.0   | 16.0  | 4.0   | 0.0   | 12.0  | 2.0  |
| 21UR-64820 | 0.0   | 0.0   | 0.0   | 0.0   | 0.0   | 0.0  |
| 21UR-64830 | 0.0   | 0.0   | 0.0   | 0.0   | 0.0   | 0.0  |
| 21UR-64840 | 0.0   | 0.0   | 0.0   | 0.0   | 0.0   | 0.0  |
| 21UR-64850 | 734.0 | 209.0 | 542.0 | 232.5 | 354.0 | 16.5 |
| 21UR-64860 | 0.0   | 0.0   | 0.0   | 0.0   | 0.0   | 0.0  |
| 21UR-64870 | 97.0  | 192.2 | 118.2 | 26.0  | 118.0 | 24.5 |
| 21UR-64880 | 0.0   | 0.0   | 3.0   | 0.0   | 0.0   | 0.0  |
| 21UR-64890 | 18.0  | 0.0   | 12.0  | 4.0   | 0.0   | 0.0  |
| 21UR-6490  | 0.0   | 0.0   | 0.0   | 0.0   | 0.0   | 0.0  |
| 21UR-64900 | 0.0   | 0.0   | 1.0   | 0.0   | 0.0   | 0.0  |
| 21UR-64910 | 0.0   | 1.0   | 0.0   | 0.0   | 0.0   | 0.0  |
| 21UR-64920 | 0.0   | 0.0   | 1.0   | 1.0   | 1.0   | 0.0  |
| 21UR-64930 | 1.0   | 0.0   | 1.0   | 0.0   | 1.0   | 0.0  |
| 21UR-64940 | 0.0   | 0.0   | 0.0   | 0.0   | 0.0   | 0.0  |
| 21UR-64950 | 0.0   | 1.0   | 0.0   | 0.0   | 0.0   | 0.0  |
| 21UR-64960 | 0.0   | 1.7   | 0.0   | 0.0   | 0.0   | 0.1  |
| 21UR-64970 | 4.0   | 5.0   | 1.0   | 0.0   | 5.0   | 0.0  |
| 21UR-64980 | 0.0   | 0.0   | 0.0   | 0.0   | 0.0   | 0.0  |
| 21UR-64990 | 1.0   | 0.0   | 0.0   | 1.0   | 1.0   | 0.0  |
| 21UR-650   | 0.0   | 1.0   | 0.0   | 1.0   | 0.0   | 1.0  |
| 21UR-6500  | 191.0 | 28.2  | 257.0 | 71.0  | 18.0  | 2.0  |
| 21UR-65000 | 0.0   | 0.0   | 0.0   | 0.0   | 0.0   | 0.0  |
| 21UR-65010 | 0.0   | 0.0   | 0.0   | 0.0   | 0.0   | 0.0  |
| 21UR-65020 | 0.0   | 0.0   | 0.0   | 1.0   | 0.0   | 0.0  |
| 21UR-65030 | 0.0   | 0.0   | 0.0   | 0.0   | 2.0   | 0.0  |
| 21UR-65040 | 0.0   | 1.0   | 0.0   | 4.0   | 0.0   | 0.0  |
| 21UR-65050 | 0.0   | 0.0   | 0.0   | 0.0   | 0.0   | 0.0  |
| 21UR-65060 | 0.0   | 0.0   | 0.0   | 0.0   | 0.0   | 0.0  |
| 21UR-65070 | 15.0  | 1.0   | 5.0   | 2.0   | 4.0   | 0.0  |
| 21UR-65080 | 0.0   | 0.0   | 0.0   | 0.0   | 0.0   | 0.0  |
| 21UR-65090 | 0.0   | 0.3   | 0.0   | 0.0   | 0.0   | 0.0  |
| 21UR-6510  | 0.0   | 0.0   | 0.0   | 0.0   | 0.0   | 0.0  |
| 21UR-65100 | 1.0   | 1.0   | 0.0   | 1.0   | 10.0  | 0.0  |
| 21UR-65110 | 0.0   | 0.0   | 0.0   | 0.0   | 0.0   | 0.0  |
| 21UR-65120 | 0.0   | 0.0   | 0.0   | 0.0   | 0.0   | 0.0  |
| 21UR-65130 | 1.0   | 1.0   | 0.0   | 0.0   | 0.0   | 0.0  |
| 21UR-65140 | 1.0   | 0.0   | 1.0   | 0.0   | 0.0   | 0.0  |
| 21UR-65150 | 0.0   | 0.0   | 0.0   | 0.0   | 0.0   | 0.0  |
| 21UR-65160 | 27.7  | 4.0   | 40.0  | 5.0   | 6.0   | 0.0  |
| 21UR-65170 | 0.0   | 0.0   | 0.0   | 0.0   | 0.0   | 0.0  |
| 21UR-65180 | 0.0   | 0.0   | 1.0   | 0.0   | 0.0   | 0.0  |
| 21UR-65190 | 4.0   | 0.0   | 0.0   | 0.0   | 0.0   | 1.0  |
| 21UR-6520  | 0.0   | 1.0   | 0.0   | 0.0   | 1.0   | 0.0  |

|            |      |      |      |      |      |     |
|------------|------|------|------|------|------|-----|
| 21UR-65200 | 0.0  | 0.0  | 0.0  | 0.0  | 0.0  | 0.0 |
| 21UR-65210 | 0.0  | 0.0  | 0.0  | 0.0  | 4.0  | 0.0 |
| 21UR-65220 | 0.0  | 2.0  | 0.0  | 0.0  | 0.0  | 0.0 |
| 21UR-65230 | 1.0  | 0.0  | 2.0  | 0.0  | 0.0  | 0.0 |
| 21UR-65240 | 62.0 | 1.0  | 53.0 | 17.0 | 1.0  | 0.0 |
| 21UR-65250 | 0.0  | 1.0  | 0.0  | 0.0  | 0.0  | 0.0 |
| 21UR-65260 | 0.0  | 1.0  | 0.0  | 0.0  | 0.0  | 0.0 |
| 21UR-65270 | 0.0  | 1.0  | 1.0  | 0.0  | 1.0  | 0.0 |
| 21UR-65280 | 0.0  | 0.0  | 4.0  | 0.0  | 1.0  | 0.0 |
| 21UR-65290 | 0.0  | 0.0  | 0.0  | 0.0  | 0.0  | 1.0 |
| 21UR-6530  | 0.0  | 1.0  | 0.0  | 1.0  | 6.0  | 0.0 |
| 21UR-65300 | 0.0  | 0.0  | 0.0  | 0.0  | 0.0  | 0.0 |
| 21UR-65310 | 0.0  | 0.1  | 0.0  | 0.0  | 0.0  | 0.0 |
| 21UR-65320 | 3.0  | 0.0  | 3.0  | 0.0  | 0.0  | 0.0 |
| 21UR-65330 | 1.0  | 0.0  | 1.0  | 0.0  | 0.0  | 0.0 |
| 21UR-65340 | 0.0  | 0.0  | 0.0  | 0.0  | 0.0  | 0.0 |
| 21UR-65350 | 1.0  | 0.0  | 4.0  | 1.0  | 0.0  | 0.0 |
| 21UR-65360 | 1.0  | 0.5  | 0.0  | 0.0  | 0.0  | 0.0 |
| 21UR-65370 | 42.0 | 8.3  | 35.0 | 7.0  | 12.5 | 0.0 |
| 21UR-65380 | 19.0 | 12.0 | 27.0 | 7.0  | 22.0 | 0.0 |
| 21UR-65390 | 0.0  | 0.0  | 0.0  | 0.0  | 0.0  | 0.0 |
| 21UR-6540  | 1.0  | 3.0  | 0.0  | 0.0  | 8.0  | 1.0 |
| 21UR-65400 | 1.0  | 19.0 | 1.0  | 0.0  | 14.0 | 1.0 |
| 21UR-65410 | 1.0  | 0.0  | 0.0  | 0.0  | 0.0  | 0.0 |
| 21UR-65420 | 1.0  | 0.0  | 1.0  | 0.0  | 1.0  | 0.0 |
| 21UR-65430 | 0.0  | 0.0  | 1.0  | 0.0  | 0.0  | 0.0 |
| 21UR-65440 | 9.0  | 0.0  | 12.0 | 1.0  | 1.0  | 0.0 |
| 21UR-65450 | 0.0  | 0.0  | 0.0  | 0.0  | 0.0  | 0.0 |
| 21UR-65460 | 6.0  | 1.0  | 2.0  | 0.0  | 0.0  | 0.0 |
| 21UR-65470 | 0.0  | 0.0  | 4.0  | 0.0  | 2.0  | 0.0 |
| 21UR-65480 | 0.0  | 1.0  | 0.0  | 0.0  | 0.0  | 0.0 |
| 21UR-65490 | 0.0  | 0.0  | 0.0  | 0.0  | 0.0  | 0.0 |
| 21UR-6550  | 1.0  | 1.0  | 0.0  | 0.0  | 1.0  | 0.0 |
| 21UR-65500 | 9.0  | 4.0  | 18.0 | 4.0  | 8.5  | 0.0 |
| 21UR-65510 | 0.0  | 0.0  | 0.0  | 0.0  | 0.0  | 0.0 |
| 21UR-65520 | 0.0  | 0.0  | 0.0  | 0.0  | 0.0  | 0.0 |
| 21UR-65530 | 0.0  | 0.0  | 0.0  | 0.0  | 2.0  | 0.0 |
| 21UR-65540 | 1.0  | 0.0  | 0.0  | 0.0  | 0.0  | 0.0 |
| 21UR-65550 | 4.0  | 0.0  | 5.0  | 0.0  | 8.0  | 0.0 |
| 21UR-65560 | 10.0 | 7.0  | 6.0  | 0.0  | 3.0  | 0.0 |
| 21UR-65570 | 1.0  | 10.0 | 0.0  | 0.0  | 23.0 | 0.0 |
| 21UR-65580 | 0.0  | 0.0  | 0.0  | 0.0  | 1.0  | 0.0 |
| 21UR-65590 | 0.0  | 0.0  | 0.0  | 0.0  | 0.0  | 0.0 |
| 21UR-6560  | 0.0  | 0.0  | 0.0  | 0.0  | 0.0  | 0.0 |
| 21UR-65600 | 0.0  | 0.0  | 0.0  | 0.0  | 0.0  | 0.0 |
| 21UR-65610 | 0.0  | 1.0  | 0.0  | 0.0  | 1.0  | 0.0 |
| 21UR-65620 | 1.0  | 0.0  | 0.0  | 0.0  | 1.0  | 0.0 |
| 21UR-65630 | 0.0  | 5.4  | 8.0  | 0.0  | 1.0  | 0.0 |
| 21UR-65640 | 0.0  | 0.0  | 0.0  | 0.0  | 0.0  | 0.0 |
| 21UR-65650 | 0.0  | 0.0  | 0.0  | 0.0  | 0.0  | 0.0 |
| 21UR-65660 | 1.0  | 0.0  | 0.0  | 0.0  | 0.0  | 0.0 |



|            |       |       |       |       |      |      |
|------------|-------|-------|-------|-------|------|------|
| 21UR-65670 | 0.0   | 0.0   | 0.0   | 0.0   | 0.0  | 0.0  |
| 21UR-65680 | 1.0   | 1.0   | 0.0   | 0.0   | 4.0  | 0.0  |
| 21UR-65690 | 5.0   | 0.0   | 0.0   | 0.0   | 0.0  | 0.0  |
| 21UR-6570  | 0.0   | 0.0   | 1.0   | 0.0   | 1.0  | 0.0  |
| 21UR-65700 | 0.0   | 0.0   | 0.0   | 0.0   | 0.0  | 0.0  |
| 21UR-65710 | 4.0   | 2.0   | 0.0   | 6.0   | 1.0  | 1.0  |
| 21UR-65720 | 0.0   | 0.0   | 0.0   | 0.0   | 1.1  | 1.0  |
| 21UR-65730 | 0.0   | 2.0   | 1.0   | 0.0   | 1.0  | 0.0  |
| 21UR-65750 | 0.0   | 3.1   | 1.0   | 0.0   | 5.0  | 0.0  |
| 21UR-65760 | 116.0 | 12.0  | 51.0  | 11.0  | 19.0 | 4.0  |
| 21UR-65770 | 0.0   | 0.0   | 0.0   | 0.0   | 0.0  | 0.0  |
| 21UR-65780 | 0.0   | 0.0   | 0.0   | 0.0   | 0.0  | 0.0  |
| 21UR-65790 | 0.0   | 0.0   | 0.0   | 0.0   | 0.0  | 0.0  |
| 21UR-6580  | 0.0   | 0.0   | 0.0   | 1.0   | 0.0  | 0.0  |
| 21UR-65800 | 2.0   | 0.0   | 0.0   | 0.0   | 0.0  | 0.0  |
| 21UR-65810 | 388.7 | 125.0 | 359.3 | 276.0 | 97.0 | 16.0 |
| 21UR-65820 | 0.0   | 0.0   | 0.0   | 0.0   | 0.0  | 0.0  |
| 21UR-65830 | 0.0   | 0.0   | 0.0   | 0.0   | 0.0  | 0.0  |
| 21UR-65840 | 4.0   | 0.0   | 0.0   | 0.0   | 1.0  | 0.0  |
| 21UR-65850 | 0.0   | 0.0   | 0.0   | 0.0   | 0.0  | 0.0  |
| 21UR-65860 | 0.0   | 0.0   | 0.0   | 0.0   | 0.0  | 0.0  |
| 21UR-65870 | 4.0   | 1.0   | 0.0   | 1.0   | 1.0  | 0.0  |
| 21UR-65880 | 1.0   | 1.0   | 0.0   | 0.0   | 5.0  | 0.0  |
| 21UR-65890 | 0.0   | 0.0   | 0.0   | 0.0   | 0.0  | 0.0  |
| 21UR-6590  | 0.0   | 0.0   | 0.0   | 0.0   | 0.0  | 0.0  |
| 21UR-65900 | 4.0   | 0.0   | 0.0   | 0.0   | 0.0  | 0.0  |
| 21UR-65910 | 0.0   | 0.0   | 1.0   | 0.0   | 1.0  | 0.0  |
| 21UR-65920 | 3.0   | 1.0   | 0.0   | 0.0   | 2.0  | 0.0  |
| 21UR-65930 | 0.0   | 0.0   | 0.0   | 0.0   | 0.0  | 0.5  |
| 21UR-65940 | 1.0   | 0.0   | 0.0   | 0.0   | 0.0  | 1.0  |
| 21UR-65950 | 0.0   | 0.0   | 0.0   | 0.0   | 0.0  | 0.0  |
| 21UR-65960 | 45.0  | 8.0   | 32.0  | 16.0  | 2.0  | 0.0  |
| 21UR-65970 | 32.0  | 26.0  | 51.0  | 12.0  | 21.3 | 2.0  |
| 21UR-65980 | 0.0   | 0.0   | 0.0   | 0.0   | 0.0  | 0.0  |
| 21UR-65990 | 0.0   | 0.0   | 0.0   | 0.0   | 0.0  | 0.0  |
| 21UR-660   | 152.0 | 44.0  | 118.0 | 48.0  | 4.0  | 11.0 |
| 21UR-6600  | 0.0   | 1.1   | 0.0   | 0.0   | 0.0  | 0.0  |
| 21UR-66000 | 0.0   | 0.0   | 0.0   | 0.0   | 0.0  | 0.0  |
| 21UR-66010 | 0.0   | 0.0   | 1.0   | 0.0   | 0.0  | 0.0  |
| 21UR-66020 | 0.0   | 0.0   | 0.0   | 0.0   | 0.0  | 0.0  |
| 21UR-66030 | 0.0   | 0.0   | 0.0   | 0.0   | 0.0  | 0.0  |
| 21UR-66040 | 0.0   | 0.0   | 0.0   | 0.0   | 0.0  | 0.0  |
| 21UR-66050 | 1.0   | 0.0   | 0.0   | 0.0   | 0.0  | 0.0  |
| 21UR-66060 | 4.0   | 1.0   | 1.0   | 1.0   | 0.0  | 0.0  |
| 21UR-66070 | 0.0   | 0.0   | 0.0   | 0.0   | 0.0  | 0.0  |
| 21UR-66080 | 13.0  | 1.0   | 22.0  | 1.0   | 1.0  | 0.0  |
| 21UR-66090 | 0.0   | 0.0   | 0.0   | 0.0   | 0.0  | 0.0  |
| 21UR-6610  | 0.0   | 1.0   | 0.0   | 0.0   | 1.0  | 0.0  |
| 21UR-66100 | 1.0   | 0.0   | 0.0   | 0.0   | 0.0  | 0.0  |
| 21UR-66110 | 0.0   | 3.0   | 0.0   | 0.0   | 0.0  | 0.0  |
| 21UR-66120 | 10.0  | 1.0   | 6.0   | 0.0   | 1.0  | 0.0  |

|            |       |      |       |      |      |      |
|------------|-------|------|-------|------|------|------|
| 21UR-66130 | 15.0  | 3.0  | 19.0  | 6.0  | 0.0  | 0.0  |
| 21UR-66140 | 0.0   | 0.0  | 1.0   | 0.0  | 3.0  | 0.0  |
| 21UR-66150 | 0.0   | 0.0  | 0.0   | 0.0  | 1.0  | 0.0  |
| 21UR-66160 | 0.0   | 0.0  | 0.0   | 0.0  | 1.0  | 0.0  |
| 21UR-66170 | 0.0   | 0.0  | 1.0   | 0.0  | 0.0  | 0.0  |
| 21UR-66180 | 6.0   | 0.0  | 0.0   | 0.0  | 1.0  | 0.0  |
| 21UR-66190 | 12.0  | 1.2  | 4.0   | 0.0  | 0.0  | 0.0  |
| 21UR-6620  | 4.0   | 0.5  | 4.0   | 0.0  | 0.0  | 0.0  |
| 21UR-66200 | 1.0   | 0.0  | 1.0   | 1.0  | 3.0  | 0.0  |
| 21UR-66210 | 0.0   | 0.0  | 1.0   | 0.0  | 1.0  | 0.0  |
| 21UR-66220 | 0.0   | 0.0  | 0.0   | 0.0  | 0.0  | 0.0  |
| 21UR-66230 | 0.0   | 0.0  | 0.0   | 0.0  | 0.0  | 0.0  |
| 21UR-66240 | 34.0  | 28.0 | 34.0  | 10.0 | 38.0 | 5.0  |
| 21UR-66250 | 0.0   | 0.0  | 0.0   | 0.0  | 0.0  | 0.0  |
| 21UR-66260 | 62.0  | 73.0 | 58.0  | 14.0 | 92.0 | 10.0 |
| 21UR-66280 | 16.0  | 33.0 | 23.0  | 6.0  | 36.3 | 2.0  |
| 21UR-66290 | 4.0   | 0.0  | 1.0   | 0.0  | 14.0 | 0.0  |
| 21UR-6630  | 1.0   | 0.0  | 0.0   | 0.0  | 0.0  | 0.0  |
| 21UR-66300 | 0.0   | 0.1  | 0.0   | 0.0  | 0.0  | 0.0  |
| 21UR-66310 | 1.0   | 0.0  | 1.0   | 0.0  | 1.0  | 0.0  |
| 21UR-66320 | 0.0   | 1.0  | 0.0   | 0.0  | 1.0  | 0.0  |
| 21UR-66330 | 0.0   | 0.0  | 0.0   | 0.0  | 0.0  | 0.0  |
| 21UR-66340 | 0.0   | 0.0  | 0.0   | 0.0  | 0.0  | 0.0  |
| 21UR-66350 | 0.0   | 0.0  | 0.0   | 0.0  | 0.0  | 0.0  |
| 21UR-66360 | 21.0  | 11.0 | 33.0  | 4.0  | 23.0 | 1.0  |
| 21UR-66370 | 0.0   | 0.0  | 0.0   | 0.0  | 1.0  | 0.0  |
| 21UR-66380 | 178.0 | 5.0  | 199.0 | 29.0 | 6.0  | 0.0  |
| 21UR-66390 | 0.0   | 0.0  | 0.0   | 0.0  | 0.0  | 1.0  |
| 21UR-6640  | 0.0   | 0.0  | 0.0   | 0.0  | 0.0  | 0.0  |
| 21UR-66400 | 0.0   | 0.0  | 1.0   | 0.0  | 0.0  | 0.0  |
| 21UR-66410 | 0.0   | 1.0  | 0.0   | 0.0  | 0.0  | 0.0  |
| 21UR-66420 | 1.0   | 0.0  | 0.0   | 0.0  | 0.0  | 0.0  |
| 21UR-66430 | 0.0   | 0.0  | 1.0   | 0.0  | 0.0  | 0.0  |
| 21UR-66440 | 0.0   | 0.0  | 0.0   | 0.0  | 0.0  | 0.0  |
| 21UR-66450 | 21.0  | 7.0  | 22.0  | 4.0  | 29.0 | 1.0  |
| 21UR-66460 | 1.0   | 5.0  | 3.0   | 0.0  | 8.0  | 0.0  |
| 21UR-66470 | 0.0   | 0.0  | 0.0   | 0.0  | 0.0  | 0.0  |
| 21UR-66480 | 0.0   | 0.0  | 1.0   | 0.0  | 0.0  | 0.0  |
| 21UR-66490 | 4.0   | 0.0  | 4.0   | 0.0  | 8.0  | 0.0  |
| 21UR-6650  | 0.0   | 0.0  | 0.0   | 0.0  | 0.0  | 0.0  |
| 21UR-66500 | 19.0  | 0.0  | 19.0  | 2.0  | 2.0  | 0.0  |
| 21UR-66510 | 0.0   | 0.0  | 0.0   | 0.0  | 0.0  | 0.0  |
| 21UR-66520 | 0.0   | 0.0  | 2.0   | 0.0  | 0.0  | 0.0  |
| 21UR-66540 | 0.0   | 0.0  | 1.0   | 0.0  | 0.0  | 0.0  |
| 21UR-66550 | 0.0   | 0.0  | 0.0   | 0.0  | 0.0  | 0.0  |
| 21UR-66560 | 60.0  | 3.0  | 34.0  | 17.0 | 10.0 | 0.0  |
| 21UR-66570 | 0.0   | 0.0  | 0.0   | 0.0  | 0.0  | 0.0  |
| 21UR-66580 | 1.0   | 0.0  | 0.0   | 0.0  | 0.0  | 0.0  |
| 21UR-66590 | 0.0   | 0.0  | 0.0   | 0.0  | 0.0  | 0.0  |
| 21UR-6660  | 0.0   | 7.0  | 4.0   | 0.0  | 1.0  | 0.0  |
| 21UR-66600 | 0.0   | 0.0  | 0.0   | 0.0  | 0.0  | 0.0  |

|            |      |      |      |      |      |     |
|------------|------|------|------|------|------|-----|
| 21UR-66610 | 0.0  | 0.0  | 0.0  | 0.0  | 0.0  | 0.0 |
| 21UR-66620 | 0.0  | 0.0  | 0.0  | 0.0  | 0.0  | 0.0 |
| 21UR-66630 | 0.0  | 0.0  | 0.0  | 0.0  | 0.0  | 0.0 |
| 21UR-66650 | 7.0  | 0.0  | 3.0  | 0.0  | 1.0  | 1.0 |
| 21UR-66660 | 1.0  | 0.0  | 0.0  | 0.0  | 0.0  | 0.0 |
| 21UR-66670 | 0.0  | 0.0  | 0.0  | 0.0  | 0.0  | 0.0 |
| 21UR-66680 | 0.0  | 1.0  | 2.0  | 0.0  | 2.0  | 0.0 |
| 21UR-66690 | 2.0  | 0.0  | 0.0  | 0.0  | 0.0  | 0.0 |
| 21UR-6670  | 0.0  | 0.0  | 0.0  | 0.0  | 1.0  | 0.0 |
| 21UR-66700 | 87.0 | 25.0 | 85.0 | 44.0 | 22.5 | 3.0 |
| 21UR-66710 | 9.0  | 1.0  | 1.0  | 0.0  | 0.0  | 0.0 |
| 21UR-66720 | 1.0  | 0.0  | 0.0  | 0.0  | 0.0  | 0.0 |
| 21UR-66730 | 1.0  | 0.0  | 0.0  | 0.0  | 0.0  | 0.0 |
| 21UR-66740 | 0.0  | 0.1  | 0.0  | 0.0  | 0.0  | 0.0 |
| 21UR-66750 | 0.0  | 0.0  | 0.0  | 0.0  | 0.0  | 0.0 |
| 21UR-66760 | 1.0  | 4.0  | 0.0  | 0.0  | 8.0  | 0.0 |
| 21UR-66770 | 0.0  | 0.0  | 0.0  | 0.0  | 0.0  | 0.0 |
| 21UR-66780 | 1.0  | 0.0  | 1.0  | 0.0  | 1.0  | 0.0 |
| 21UR-66790 | 2.0  | 1.0  | 10.0 | 4.0  | 0.0  | 0.0 |
| 21UR-6680  | 16.0 | 14.0 | 31.0 | 8.0  | 27.0 | 4.0 |
| 21UR-66800 | 4.0  | 6.0  | 8.0  | 0.0  | 19.0 | 0.0 |
| 21UR-66810 | 0.0  | 0.0  | 0.0  | 0.0  | 0.0  | 0.0 |
| 21UR-66820 | 0.0  | 1.0  | 0.0  | 2.0  | 2.0  | 0.0 |
| 21UR-66830 | 3.0  | 0.0  | 0.0  | 0.0  | 0.0  | 0.0 |
| 21UR-66840 | 0.0  | 1.0  | 1.0  | 1.0  | 0.0  | 0.0 |
| 21UR-66850 | 0.0  | 0.0  | 0.0  | 0.0  | 4.0  | 0.0 |
| 21UR-66860 | 0.0  | 0.0  | 1.0  | 0.0  | 0.0  | 1.0 |
| 21UR-66870 | 1.0  | 4.0  | 1.0  | 0.0  | 0.0  | 0.0 |
| 21UR-66880 | 21.0 | 5.0  | 25.0 | 14.0 | 15.0 | 1.0 |
| 21UR-66890 | 17.0 | 1.0  | 14.0 | 5.0  | 4.0  | 0.0 |
| 21UR-6690  | 0.0  | 0.0  | 0.0  | 0.0  | 0.0  | 0.0 |
| 21UR-66900 | 0.0  | 0.0  | 0.0  | 0.0  | 1.0  | 0.0 |
| 21UR-66910 | 0.0  | 3.0  | 0.0  | 0.0  | 6.0  | 0.0 |
| 21UR-66920 | 0.0  | 0.0  | 0.0  | 0.0  | 1.0  | 0.0 |
| 21UR-66930 | 0.0  | 0.0  | 0.0  | 0.0  | 0.0  | 0.0 |
| 21UR-66940 | 0.0  | 1.0  | 0.0  | 0.0  | 1.0  | 1.0 |
| 21UR-66950 | 0.0  | 1.0  | 0.0  | 0.0  | 0.0  | 0.0 |
| 21UR-66960 | 0.0  | 0.0  | 0.0  | 0.0  | 0.0  | 0.0 |
| 21UR-66970 | 0.0  | 0.0  | 0.0  | 0.0  | 0.0  | 0.0 |
| 21UR-66980 | 16.0 | 8.0  | 24.0 | 1.0  | 8.0  | 0.0 |
| 21UR-66990 | 1.0  | 1.0  | 1.0  | 1.0  | 0.0  | 0.0 |
| 21UR-670   | 0.0  | 0.0  | 0.0  | 0.0  | 1.0  | 0.0 |
| 21UR-6700  | 0.0  | 2.0  | 0.0  | 2.0  | 1.0  | 0.0 |
| 21UR-67000 | 0.0  | 0.0  | 8.0  | 0.0  | 0.0  | 0.0 |
| 21UR-67010 | 18.0 | 1.0  | 11.0 | 4.0  | 1.0  | 1.0 |
| 21UR-67020 | 4.0  | 0.0  | 8.0  | 0.0  | 1.0  | 0.0 |
| 21UR-67030 | 6.0  | 0.0  | 6.0  | 0.0  | 0.0  | 0.0 |
| 21UR-67040 | 0.0  | 0.0  | 1.0  | 0.0  | 0.0  | 0.0 |
| 21UR-67060 | 0.0  | 2.0  | 0.0  | 0.0  | 1.0  | 0.0 |
| 21UR-67070 | 1.0  | 0.0  | 0.0  | 1.0  | 1.0  | 0.0 |
| 21UR-67080 | 0.0  | 0.1  | 0.0  | 0.0  | 0.0  | 1.0 |

|            |       |      |       |      |      |     |
|------------|-------|------|-------|------|------|-----|
| 21UR-67090 | 7.0   | 3.0  | 16.5  | 3.0  | 2.0  | 0.0 |
| 21UR-6710  | 1.0   | 0.0  | 0.0   | 0.0  | 0.0  | 0.0 |
| 21UR-67100 | 0.0   | 0.0  | 4.0   | 0.0  | 1.0  | 0.0 |
| 21UR-67110 | 0.0   | 0.0  | 0.0   | 0.0  | 0.0  | 0.0 |
| 21UR-67120 | 50.0  | 5.0  | 40.0  | 6.0  | 4.0  | 1.0 |
| 21UR-67130 | 0.0   | 0.0  | 0.0   | 0.0  | 0.0  | 0.0 |
| 21UR-67140 | 20.0  | 12.9 | 31.0  | 0.0  | 9.0  | 5.4 |
| 21UR-67150 | 56.0  | 6.0  | 64.0  | 11.0 | 17.0 | 4.0 |
| 21UR-67160 | 0.0   | 0.0  | 0.0   | 0.0  | 0.0  | 0.0 |
| 21UR-67170 | 7.0   | 0.0  | 4.0   | 0.0  | 2.0  | 0.0 |
| 21UR-67180 | 4.0   | 0.0  | 1.0   | 0.0  | 0.0  | 0.0 |
| 21UR-67190 | 1.0   | 0.0  | 4.0   | 0.0  | 6.0  | 1.0 |
| 21UR-6720  | 69.6  | 22.3 | 8.0   | 38.0 | 27.0 | 3.0 |
| 21UR-67200 | 0.0   | 0.0  | 0.0   | 0.0  | 1.0  | 0.0 |
| 21UR-67210 | 4.0   | 5.0  | 5.0   | 2.0  | 5.0  | 0.0 |
| 21UR-67220 | 4.0   | 0.0  | 6.0   | 1.0  | 1.0  | 0.0 |
| 21UR-67230 | 1.0   | 0.0  | 0.0   | 0.0  | 0.0  | 0.0 |
| 21UR-67240 | 0.0   | 0.0  | 0.0   | 0.0  | 0.0  | 0.0 |
| 21UR-67250 | 0.0   | 0.1  | 0.0   | 0.0  | 0.0  | 0.0 |
| 21UR-67260 | 0.0   | 0.1  | 0.0   | 0.0  | 0.0  | 0.0 |
| 21UR-67270 | 1.0   | 8.0  | 0.0   | 0.0  | 1.0  | 4.0 |
| 21UR-67280 | 4.0   | 1.0  | 14.0  | 6.0  | 6.0  | 0.0 |
| 21UR-67290 | 6.0   | 0.0  | 10.0  | 2.0  | 10.0 | 0.0 |
| 21UR-6730  | 6.0   | 13.0 | 17.0  | 5.0  | 43.0 | 0.0 |
| 21UR-67300 | 0.0   | 0.0  | 0.0   | 1.0  | 0.0  | 0.0 |
| 21UR-67310 | 0.0   | 0.0  | 0.0   | 0.0  | 0.0  | 0.0 |
| 21UR-67320 | 0.0   | 0.0  | 0.0   | 0.0  | 0.0  | 0.0 |
| 21UR-67330 | 0.0   | 0.0  | 0.0   | 0.0  | 0.0  | 0.0 |
| 21UR-67340 | 0.0   | 0.0  | 0.0   | 0.0  | 0.0  | 0.0 |
| 21UR-67350 | 0.0   | 0.0  | 0.0   | 0.0  | 0.0  | 0.0 |
| 21UR-67360 | 0.0   | 1.0  | 0.0   | 0.0  | 4.0  | 0.0 |
| 21UR-67370 | 150.0 | 3.0  | 143.0 | 22.0 | 6.0  | 1.0 |
| 21UR-67380 | 0.0   | 0.0  | 0.0   | 0.0  | 0.0  | 0.0 |
| 21UR-67390 | 0.0   | 0.0  | 0.0   | 0.0  | 0.0  | 0.0 |
| 21UR-6740  | 4.0   | 0.0  | 0.0   | 0.0  | 0.0  | 0.0 |
| 21UR-67400 | 0.0   | 0.0  | 0.0   | 0.0  | 0.0  | 0.0 |
| 21UR-67410 | 1.0   | 0.0  | 3.0   | 0.0  | 4.0  | 0.0 |
| 21UR-67420 | 0.0   | 0.0  | 0.0   | 0.0  | 2.0  | 0.0 |
| 21UR-67430 | 0.0   | 0.0  | 0.0   | 0.0  | 0.0  | 0.0 |
| 21UR-67440 | 1.0   | 0.0  | 8.0   | 0.0  | 0.0  | 0.0 |
| 21UR-67450 | 0.0   | 0.0  | 0.0   | 0.0  | 4.0  | 0.0 |
| 21UR-67460 | 0.0   | 0.0  | 1.0   | 0.0  | 0.0  | 0.0 |
| 21UR-67470 | 0.0   | 0.0  | 0.0   | 0.0  | 0.0  | 0.0 |
| 21UR-67480 | 1.0   | 0.0  | 0.0   | 0.0  | 1.0  | 0.0 |
| 21UR-67490 | 1.0   | 0.0  | 6.0   | 0.0  | 1.0  | 1.0 |
| 21UR-6750  | 0.0   | 0.0  | 0.0   | 0.0  | 0.0  | 0.0 |
| 21UR-67500 | 0.0   | 4.0  | 1.0   | 0.0  | 1.0  | 0.0 |
| 21UR-67510 | 8.0   | 6.0  | 9.0   | 1.0  | 14.0 | 0.0 |
| 21UR-67520 | 8.0   | 4.0  | 2.0   | 4.0  | 0.0  | 4.0 |
| 21UR-67530 | 0.0   | 0.0  | 0.0   | 0.0  | 0.0  | 0.0 |
| 21UR-67540 | 25.0  | 7.0  | 10.0  | 4.0  | 7.0  | 0.0 |

|            |       |      |       |      |      |     |
|------------|-------|------|-------|------|------|-----|
| 21UR-67550 | 0.0   | 0.0  | 0.0   | 0.0  | 1.0  | 0.0 |
| 21UR-67560 | 4.0   | 4.0  | 0.0   | 0.0  | 4.0  | 0.0 |
| 21UR-67570 | 0.0   | 0.0  | 0.0   | 0.0  | 1.0  | 0.0 |
| 21UR-67580 | 4.0   | 0.0  | 4.0   | 0.0  | 0.0  | 1.0 |
| 21UR-67590 | 4.0   | 0.0  | 1.0   | 0.0  | 0.0  | 0.0 |
| 21UR-6760  | 0.0   | 0.0  | 0.0   | 0.0  | 0.0  | 0.0 |
| 21UR-67600 | 0.0   | 0.0  | 0.0   | 0.0  | 0.0  | 0.0 |
| 21UR-67610 | 10.3  | 2.0  | 12.0  | 8.0  | 6.5  | 0.0 |
| 21UR-67620 | 0.0   | 0.0  | 0.0   | 0.0  | 0.0  | 0.0 |
| 21UR-67630 | 0.0   | 0.0  | 0.0   | 0.0  | 0.0  | 0.0 |
| 21UR-67640 | 5.0   | 5.0  | 9.0   | 0.0  | 4.0  | 0.0 |
| 21UR-67650 | 3.0   | 2.0  | 1.0   | 0.0  | 2.0  | 0.0 |
| 21UR-67660 | 0.0   | 0.0  | 1.0   | 0.0  | 2.0  | 2.0 |
| 21UR-67670 | 12.0  | 8.0  | 46.0  | 1.0  | 6.0  | 0.0 |
| 21UR-67680 | 14.0  | 1.0  | 7.0   | 4.0  | 4.0  | 0.0 |
| 21UR-67690 | 0.0   | 0.0  | 0.0   | 0.0  | 0.0  | 0.0 |
| 21UR-6770  | 0.0   | 0.0  | 4.0   | 0.0  | 0.0  | 0.0 |
| 21UR-67700 | 0.0   | 0.0  | 0.0   | 0.0  | 0.0  | 0.0 |
| 21UR-67710 | 73.7  | 8.0  | 34.0  | 9.0  | 19.0 | 0.0 |
| 21UR-67720 | 1.0   | 0.0  | 1.0   | 0.0  | 0.0  | 0.0 |
| 21UR-67730 | 0.0   | 0.0  | 0.0   | 0.0  | 0.0  | 0.0 |
| 21UR-67740 | 6.0   | 0.0  | 2.0   | 0.0  | 1.0  | 0.0 |
| 21UR-67750 | 0.0   | 1.0  | 0.0   | 0.0  | 0.0  | 0.0 |
| 21UR-67760 | 1.0   | 0.0  | 0.0   | 1.0  | 0.0  | 0.0 |
| 21UR-67770 | 0.0   | 0.0  | 0.0   | 0.0  | 0.0  | 0.0 |
| 21UR-67780 | 6.0   | 0.0  | 4.0   | 0.0  | 4.0  | 0.0 |
| 21UR-67790 | 44.7  | 5.0  | 28.0  | 10.0 | 13.2 | 1.0 |
| 21UR-6780  | 0.0   | 0.0  | 0.0   | 0.0  | 0.0  | 0.0 |
| 21UR-67800 | 4.0   | 1.0  | 0.0   | 1.0  | 1.0  | 0.0 |
| 21UR-67810 | 0.0   | 0.0  | 0.0   | 0.0  | 0.0  | 0.0 |
| 21UR-67820 | 0.0   | 0.0  | 0.0   | 0.0  | 0.0  | 0.0 |
| 21UR-67830 | 0.0   | 0.0  | 0.0   | 0.0  | 1.0  | 0.0 |
| 21UR-67840 | 0.0   | 0.0  | 0.0   | 0.0  | 0.0  | 0.0 |
| 21UR-67850 | 6.0   | 8.0  | 1.0   | 0.0  | 0.0  | 0.0 |
| 21UR-67860 | 0.0   | 10.0 | 0.0   | 1.0  | 1.0  | 2.0 |
| 21UR-67870 | 1.0   | 1.0  | 0.0   | 0.0  | 0.0  | 1.0 |
| 21UR-67880 | 0.0   | 0.0  | 0.0   | 0.0  | 0.0  | 0.0 |
| 21UR-67890 | 4.0   | 0.0  | 4.0   | 1.0  | 7.0  | 0.0 |
| 21UR-6790  | 0.0   | 10.0 | 0.0   | 0.0  | 1.0  | 0.1 |
| 21UR-67900 | 6.0   | 8.0  | 4.0   | 0.0  | 1.0  | 0.0 |
| 21UR-67910 | 0.0   | 0.0  | 0.0   | 0.0  | 0.0  | 0.0 |
| 21UR-67920 | 1.0   | 1.0  | 6.0   | 0.0  | 0.0  | 0.0 |
| 21UR-67930 | 0.0   | 0.0  | 1.0   | 0.0  | 0.0  | 0.0 |
| 21UR-67940 | 1.0   | 1.0  | 6.0   | 2.0  | 1.0  | 0.0 |
| 21UR-67950 | 1.0   | 0.0  | 1.0   | 0.0  | 1.0  | 0.0 |
| 21UR-67960 | 0.0   | 0.0  | 0.0   | 0.0  | 0.0  | 0.0 |
| 21UR-67970 | 0.0   | 1.0  | 0.0   | 0.0  | 1.0  | 0.0 |
| 21UR-67980 | 0.0   | 0.0  | 0.0   | 0.0  | 0.0  | 0.0 |
| 21UR-67990 | 323.0 | 6.0  | 271.0 | 97.0 | 8.0  | 1.0 |
| 21UR-680   | 39.0  | 3.0  | 63.0  | 12.0 | 12.0 | 1.0 |
| 21UR-6800  | 0.0   | 2.0  | 0.0   | 1.0  | 8.0  | 0.0 |

|            |       |      |       |      |      |      |
|------------|-------|------|-------|------|------|------|
| 21UR-68000 | 0.0   | 0.0  | 0.0   | 0.0  | 0.0  | 0.0  |
| 21UR-68010 | 0.0   | 0.0  | 1.0   | 0.0  | 0.0  | 0.0  |
| 21UR-68020 | 1.0   | 0.0  | 0.0   | 0.0  | 0.0  | 0.0  |
| 21UR-68030 | 18.0  | 0.0  | 8.0   | 0.0  | 4.0  | 1.0  |
| 21UR-68040 | 19.0  | 11.0 | 11.0  | 6.0  | 17.0 | 0.0  |
| 21UR-68050 | 0.0   | 0.0  | 0.0   | 0.0  | 0.0  | 0.0  |
| 21UR-68060 | 1.0   | 0.0  | 1.0   | 1.0  | 0.0  | 0.0  |
| 21UR-68070 | 6.0   | 0.0  | 4.0   | 1.0  | 0.0  | 0.0  |
| 21UR-68080 | 0.0   | 0.0  | 0.0   | 0.0  | 1.0  | 0.0  |
| 21UR-68090 | 0.0   | 0.0  | 0.0   | 0.0  | 0.0  | 0.0  |
| 21UR-6810  | 125.0 | 15.0 | 117.0 | 20.0 | 21.0 | 4.0  |
| 21UR-68100 | 0.0   | 0.0  | 0.0   | 0.0  | 9.0  | 0.0  |
| 21UR-68110 | 0.0   | 0.0  | 1.0   | 0.0  | 0.0  | 0.0  |
| 21UR-68120 | 0.0   | 0.0  | 0.0   | 1.0  | 0.0  | 0.0  |
| 21UR-68130 | 0.0   | 1.0  | 0.0   | 0.0  | 0.0  | 0.0  |
| 21UR-68140 | 39.0  | 7.0  | 22.0  | 5.0  | 6.0  | 0.1  |
| 21UR-68150 | 2.0   | 0.0  | 0.0   | 0.0  | 1.0  | 0.0  |
| 21UR-68160 | 0.0   | 0.0  | 0.0   | 0.0  | 0.0  | 0.0  |
| 21UR-68170 | 0.0   | 1.0  | 1.0   | 0.0  | 2.0  | 0.0  |
| 21UR-68180 | 8.0   | 4.1  | 12.0  | 10.0 | 0.0  | 0.0  |
| 21UR-68190 | 0.0   | 0.0  | 0.0   | 0.0  | 0.0  | 0.0  |
| 21UR-6820  | 0.0   | 0.0  | 0.0   | 0.0  | 0.0  | 0.0  |
| 21UR-68200 | 1.0   | 2.0  | 0.0   | 1.0  | 1.0  | 0.0  |
| 21UR-68210 | 8.0   | 0.0  | 6.0   | 1.0  | 2.0  | 0.0  |
| 21UR-68220 | 0.0   | 1.0  | 0.0   | 0.0  | 0.0  | 0.0  |
| 21UR-68230 | 0.0   | 0.0  | 0.0   | 0.0  | 0.0  | 0.0  |
| 21UR-68240 | 1.0   | 1.0  | 10.0  | 0.0  | 3.0  | 0.0  |
| 21UR-68250 | 0.0   | 0.0  | 1.0   | 0.0  | 0.0  | 0.0  |
| 21UR-68260 | 0.0   | 0.0  | 0.0   | 0.0  | 0.0  | 0.0  |
| 21UR-68270 | 1.0   | 0.0  | 0.0   | 0.0  | 1.0  | 0.0  |
| 21UR-68280 | 21.0  | 14.0 | 20.0  | 6.0  | 2.0  | 13.1 |
| 21UR-68290 | 0.0   | 0.0  | 0.0   | 0.0  | 0.0  | 0.0  |
| 21UR-6830  | 0.0   | 0.0  | 0.0   | 0.0  | 0.0  | 0.0  |
| 21UR-68300 | 1.0   | 2.0  | 2.0   | 0.0  | 1.0  | 0.0  |
| 21UR-68310 | 8.0   | 27.0 | 1.0   | 2.0  | 21.0 | 2.0  |
| 21UR-68320 | 0.0   | 0.0  | 8.0   | 0.0  | 0.0  | 0.0  |
| 21UR-68330 | 0.0   | 0.0  | 0.0   | 0.0  | 0.0  | 0.0  |
| 21UR-68340 | 42.0  | 3.0  | 46.0  | 19.0 | 7.5  | 4.0  |
| 21UR-68350 | 0.0   | 0.0  | 0.0   | 0.0  | 0.0  | 0.0  |
| 21UR-68360 | 1.0   | 1.0  | 1.0   | 0.0  | 0.0  | 0.0  |
| 21UR-68370 | 0.0   | 2.0  | 0.0   | 0.0  | 4.0  | 0.0  |
| 21UR-68380 | 15.0  | 1.0  | 12.0  | 1.0  | 4.0  | 0.0  |
| 21UR-68390 | 0.0   | 0.0  | 0.0   | 0.0  | 0.0  | 0.0  |
| 21UR-6840  | 4.0   | 1.0  | 0.0   | 0.0  | 0.0  | 0.0  |
| 21UR-68400 | 0.0   | 1.0  | 1.0   | 0.0  | 4.0  | 0.0  |
| 21UR-68410 | 0.0   | 0.0  | 0.0   | 0.0  | 0.0  | 0.0  |
| 21UR-68420 | 15.0  | 1.0  | 16.0  | 2.0  | 3.0  | 0.0  |
| 21UR-68430 | 0.0   | 0.0  | 0.0   | 0.0  | 0.0  | 0.0  |
| 21UR-68440 | 1.0   | 0.0  | 6.0   | 0.0  | 0.0  | 0.0  |
| 21UR-68450 | 1.0   | 0.0  | 1.0   | 4.0  | 0.0  | 0.0  |
| 21UR-68460 | 27.0  | 1.0  | 22.0  | 0.0  | 6.0  | 1.0  |

|            |       |      |       |      |       |      |
|------------|-------|------|-------|------|-------|------|
| 21UR-68470 | 0.0   | 0.0  | 0.0   | 0.0  | 0.0   | 0.0  |
| 21UR-68480 | 0.0   | 0.0  | 0.0   | 0.0  | 0.0   | 0.0  |
| 21UR-68490 | 0.0   | 0.0  | 0.0   | 0.0  | 0.0   | 0.0  |
| 21UR-6850  | 2.0   | 6.0  | 8.0   | 4.0  | 11.0  | 0.0  |
| 21UR-68500 | 0.0   | 0.0  | 0.0   | 0.0  | 0.0   | 0.0  |
| 21UR-68510 | 0.0   | 0.0  | 0.0   | 0.0  | 0.0   | 0.0  |
| 21UR-68520 | 1.0   | 6.0  | 0.0   | 0.0  | 5.5   | 0.0  |
| 21UR-68530 | 0.0   | 0.5  | 0.0   | 0.0  | 0.0   | 1.0  |
| 21UR-68540 | 0.0   | 0.0  | 1.0   | 0.0  | 0.0   | 0.0  |
| 21UR-68550 | 0.0   | 0.0  | 0.0   | 0.0  | 0.0   | 0.0  |
| 21UR-68560 | 0.0   | 0.0  | 0.0   | 0.0  | 4.0   | 0.0  |
| 21UR-68570 | 0.0   | 0.0  | 0.0   | 0.0  | 0.0   | 0.0  |
| 21UR-68580 | 81.0  | 4.0  | 43.0  | 8.0  | 4.0   | 0.0  |
| 21UR-68590 | 0.0   | 0.0  | 0.0   | 1.0  | 1.0   | 0.0  |
| 21UR-6860  | 0.0   | 0.0  | 0.0   | 0.0  | 6.0   | 0.0  |
| 21UR-68600 | 8.7   | 0.0  | 6.0   | 0.0  | 27.0  | 1.0  |
| 21UR-68610 | 0.0   | 1.0  | 4.0   | 0.0  | 1.0   | 0.0  |
| 21UR-68620 | 0.0   | 0.0  | 0.0   | 0.0  | 0.0   | 1.0  |
| 21UR-68630 | 1.0   | 0.0  | 0.0   | 0.0  | 1.0   | 0.0  |
| 21UR-68640 | 0.0   | 0.0  | 0.0   | 0.0  | 1.0   | 0.0  |
| 21UR-68650 | 308.0 | 43.0 | 213.1 | 72.0 | 111.3 | 14.0 |
| 21UR-68660 | 0.0   | 0.0  | 0.0   | 0.0  | 0.0   | 0.0  |
| 21UR-68670 | 0.0   | 0.0  | 0.0   | 0.0  | 1.0   | 0.0  |
| 21UR-68680 | 1.0   | 0.0  | 0.0   | 0.0  | 0.0   | 0.0  |
| 21UR-68690 | 0.0   | 0.0  | 0.0   | 0.0  | 0.0   | 0.0  |
| 21UR-6870  | 1.0   | 0.0  | 1.0   | 0.0  | 2.0   | 0.0  |
| 21UR-68700 | 0.0   | 0.0  | 0.0   | 0.0  | 0.0   | 0.0  |
| 21UR-68710 | 0.0   | 0.0  | 0.0   | 0.0  | 0.0   | 0.0  |
| 21UR-68720 | 1.0   | 0.0  | 0.0   | 0.0  | 0.0   | 0.0  |
| 21UR-68730 | 3.0   | 0.0  | 7.0   | 3.0  | 0.0   | 0.0  |
| 21UR-68740 | 1.0   | 1.0  | 4.0   | 0.0  | 1.0   | 0.0  |
| 21UR-68750 | 8.0   | 0.0  | 1.0   | 0.0  | 0.0   | 0.0  |
| 21UR-68760 | 0.0   | 1.0  | 1.0   | 0.0  | 1.0   | 0.0  |
| 21UR-68770 | 0.0   | 0.0  | 0.0   | 0.0  | 0.0   | 0.0  |
| 21UR-68780 | 0.0   | 0.0  | 0.0   | 0.0  | 4.0   | 0.0  |
| 21UR-68790 | 0.0   | 2.0  | 1.0   | 0.0  | 1.0   | 0.0  |
| 21UR-6880  | 5.0   | 0.0  | 4.0   | 1.0  | 1.0   | 0.0  |
| 21UR-68800 | 0.0   | 0.0  | 0.0   | 0.0  | 0.0   | 0.0  |
| 21UR-68810 | 16.0  | 0.0  | 4.0   | 1.0  | 1.0   | 0.0  |
| 21UR-68820 | 0.0   | 0.0  | 1.0   | 0.0  | 0.0   | 0.0  |
| 21UR-68830 | 0.0   | 0.0  | 0.0   | 0.0  | 0.0   | 0.0  |
| 21UR-68840 | 0.0   | 0.0  | 0.0   | 0.0  | 0.0   | 0.0  |
| 21UR-68850 | 0.0   | 0.0  | 0.0   | 0.0  | 0.0   | 0.0  |
| 21UR-68860 | 0.0   | 0.0  | 0.0   | 0.0  | 0.0   | 0.0  |
| 21UR-68870 | 14.0  | 0.0  | 12.0  | 1.0  | 1.0   | 0.0  |
| 21UR-68880 | 6.0   | 25.0 | 1.0   | 2.0  | 17.0  | 2.0  |
| 21UR-68890 | 25.0  | 6.0  | 14.0  | 13.0 | 14.0  | 0.0  |
| 21UR-6890  | 0.0   | 0.0  | 0.0   | 0.0  | 0.0   | 0.0  |
| 21UR-68910 | 0.0   | 0.0  | 0.0   | 0.0  | 0.0   | 0.0  |
| 21UR-68920 | 4.0   | 0.0  | 5.0   | 1.0  | 1.0   | 0.0  |
| 21UR-68930 | 0.0   | 0.0  | 1.0   | 0.0  | 0.0   | 0.0  |

|            |       |      |       |      |       |      |
|------------|-------|------|-------|------|-------|------|
| 21UR-68940 | 1.0   | 0.0  | 0.0   | 0.0  | 0.0   | 0.0  |
| 21UR-68950 | 0.0   | 0.0  | 1.0   | 0.0  | 0.0   | 0.0  |
| 21UR-68960 | 0.0   | 0.1  | 0.0   | 0.0  | 0.0   | 0.0  |
| 21UR-68970 | 2.0   | 0.0  | 3.0   | 0.0  | 1.0   | 0.0  |
| 21UR-68980 | 12.0  | 6.0  | 1.0   | 1.0  | 8.0   | 0.0  |
| 21UR-68990 | 0.0   | 0.0  | 0.0   | 0.0  | 1.0   | 0.0  |
| 21UR-690   | 0.0   | 0.0  | 0.0   | 0.0  | 0.0   | 0.0  |
| 21UR-69000 | 0.0   | 0.0  | 0.0   | 0.0  | 0.0   | 0.0  |
| 21UR-69010 | 3.0   | 0.0  | 4.0   | 2.0  | 1.0   | 0.0  |
| 21UR-69020 | 0.0   | 0.0  | 0.0   | 0.0  | 0.0   | 0.0  |
| 21UR-69030 | 0.0   | 0.0  | 0.0   | 0.0  | 0.0   | 0.0  |
| 21UR-69040 | 0.0   | 0.2  | 0.0   | 0.0  | 0.0   | 0.0  |
| 21UR-69050 | 1.0   | 0.0  | 4.0   | 1.0  | 1.0   | 1.0  |
| 21UR-69060 | 1.0   | 0.0  | 1.0   | 0.0  | 0.0   | 0.0  |
| 21UR-69070 | 0.0   | 0.0  | 0.0   | 0.0  | 0.3   | 1.0  |
| 21UR-69080 | 0.0   | 0.0  | 0.0   | 0.0  | 1.0   | 0.0  |
| 21UR-69090 | 6.0   | 4.0  | 10.0  | 4.0  | 5.0   | 4.0  |
| 21UR-6910  | 19.0  | 0.0  | 16.0  | 4.0  | 5.0   | 0.0  |
| 21UR-69100 | 14.0  | 10.0 | 29.0  | 10.0 | 17.0  | 4.0  |
| 21UR-69110 | 1.0   | 3.0  | 0.0   | 0.0  | 1.0   | 0.0  |
| 21UR-69120 | 0.0   | 0.0  | 0.0   | 0.0  | 0.0   | 0.0  |
| 21UR-69130 | 15.0  | 4.0  | 13.0  | 7.0  | 5.0   | 0.0  |
| 21UR-69140 | 189.5 | 31.0 | 134.0 | 96.5 | 71.0  | 5.0  |
| 21UR-69150 | 1.0   | 1.0  | 0.0   | 0.0  | 0.0   | 0.0  |
| 21UR-69160 | 26.0  | 0.0  | 7.0   | 0.0  | 2.0   | 0.0  |
| 21UR-69170 | 0.0   | 0.0  | 0.0   | 0.0  | 0.0   | 0.0  |
| 21UR-69180 | 3.0   | 0.0  | 6.0   | 2.0  | 1.0   | 0.0  |
| 21UR-69190 | 1.0   | 5.0  | 4.0   | 0.0  | 9.0   | 0.0  |
| 21UR-6920  | 117.0 | 24.0 | 117.0 | 61.0 | 132.0 | 10.0 |
| 21UR-69200 | 4.0   | 0.0  | 1.0   | 1.0  | 0.0   | 0.0  |
| 21UR-69210 | 0.0   | 0.0  | 0.0   | 0.0  | 0.0   | 1.0  |
| 21UR-69220 | 0.0   | 0.0  | 1.0   | 1.0  | 0.2   | 1.0  |
| 21UR-69230 | 1.0   | 4.0  | 1.0   | 1.0  | 1.0   | 0.0  |
| 21UR-69240 | 1.0   | 2.5  | 4.0   | 2.0  | 3.0   | 0.0  |
| 21UR-69250 | 34.0  | 23.0 | 35.0  | 17.0 | 31.0  | 0.0  |
| 21UR-69260 | 0.0   | 0.0  | 0.0   | 0.0  | 0.0   | 0.0  |
| 21UR-69270 | 0.0   | 0.0  | 0.0   | 0.0  | 0.0   | 0.0  |
| 21UR-69280 | 0.0   | 0.0  | 0.0   | 0.0  | 0.0   | 0.0  |
| 21UR-69290 | 0.0   | 1.0  | 0.0   | 0.0  | 0.0   | 0.0  |
| 21UR-6930  | 0.0   | 6.0  | 1.0   | 0.0  | 7.0   | 0.0  |
| 21UR-69300 | 4.0   | 0.0  | 0.0   | 0.0  | 4.0   | 0.0  |
| 21UR-69310 | 1.0   | 0.0  | 0.0   | 0.0  | 0.0   | 0.0  |
| 21UR-69320 | 0.0   | 2.0  | 1.0   | 0.0  | 1.0   | 0.0  |
| 21UR-69330 | 31.0  | 0.0  | 23.0  | 6.0  | 5.0   | 0.0  |
| 21UR-69350 | 4.0   | 0.0  | 6.0   | 0.0  | 0.0   | 0.0  |
| 21UR-69360 | 0.0   | 0.0  | 0.0   | 0.0  | 0.0   | 0.0  |
| 21UR-69370 | 4.0   | 6.0  | 4.0   | 0.0  | 1.0   | 3.0  |
| 21UR-69380 | 0.0   | 1.0  | 0.0   | 0.0  | 4.0   | 0.0  |
| 21UR-69390 | 376.0 | 9.0  | 266.3 | 92.0 | 20.7  | 0.0  |
| 21UR-6940  | 28.5  | 11.0 | 34.5  | 8.0  | 15.5  | 0.5  |
| 21UR-69400 | 0.0   | 0.0  | 0.0   | 0.0  | 0.0   | 0.0  |



|            |        |       |        |        |       |      |
|------------|--------|-------|--------|--------|-------|------|
| 21UR-69410 | 4.0    | 9.7   | 1.0    | 1.0    | 8.0   | 1.0  |
| 21UR-69420 | 0.0    | 0.0   | 0.0    | 0.0    | 0.0   | 0.0  |
| 21UR-69430 | 23.0   | 0.0   | 14.0   | 2.0    | 2.0   | 0.0  |
| 21UR-69440 | 0.0    | 0.0   | 0.0    | 0.0    | 1.0   | 0.0  |
| 21UR-69450 | 0.0    | 0.0   | 1.0    | 1.0    | 1.0   | 0.0  |
| 21UR-69460 | 0.0    | 1.0   | 1.0    | 0.0    | 0.0   | 0.0  |
| 21UR-69470 | 0.0    | 0.0   | 0.0    | 0.0    | 0.0   | 0.0  |
| 21UR-69480 | 4.0    | 0.0   | 0.0    | 0.0    | 0.0   | 0.0  |
| 21UR-69490 | 4.0    | 0.3   | 0.0    | 0.0    | 0.0   | 0.0  |
| 21UR-6950  | 0.0    | 0.0   | 0.0    | 0.0    | 0.0   | 0.0  |
| 21UR-69500 | 4.0    | 4.0   | 3.0    | 1.0    | 6.0   | 1.0  |
| 21UR-69510 | 0.0    | 0.0   | 1.0    | 0.0    | 0.0   | 0.0  |
| 21UR-69520 | 0.0    | 0.0   | 1.0    | 0.0    | 0.0   | 0.0  |
| 21UR-69530 | 6123.0 | 494.5 | 4193.0 | 3106.0 | 551.3 | 43.0 |
| 21UR-69540 | 0.0    | 0.0   | 0.0    | 0.0    | 0.0   | 0.0  |
| 21UR-69550 | 0.0    | 0.0   | 6.0    | 0.0    | 1.0   | 0.0  |
| 21UR-69560 | 0.0    | 0.0   | 0.0    | 0.0    | 0.0   | 0.0  |
| 21UR-69570 | 0.0    | 0.0   | 0.0    | 0.0    | 0.0   | 0.0  |
| 21UR-69580 | 22.0   | 4.0   | 14.0   | 12.0   | 1.0   | 0.0  |
| 21UR-69590 | 0.0    | 0.0   | 0.0    | 0.0    | 0.0   | 0.0  |
| 21UR-6960  | 0.0    | 0.0   | 0.0    | 0.0    | 0.0   | 0.0  |
| 21UR-69600 | 14.0   | 3.0   | 20.0   | 6.0    | 2.0   | 1.0  |
| 21UR-69610 | 0.0    | 0.0   | 0.0    | 0.0    | 0.0   | 0.0  |
| 21UR-69620 | 6.0    | 2.0   | 5.0    | 0.0    | 4.0   | 0.0  |
| 21UR-69630 | 0.0    | 0.0   | 0.0    | 0.0    | 0.0   | 0.0  |
| 21UR-69640 | 14.0   | 1.0   | 16.0   | 0.0    | 11.0  | 0.1  |
| 21UR-69650 | 14.0   | 0.0   | 14.0   | 4.0    | 15.0  | 0.0  |
| 21UR-69660 | 0.0    | 0.0   | 1.0    | 0.0    | 0.0   | 0.0  |
| 21UR-69670 | 1.0    | 0.0   | 0.0    | 0.0    | 0.0   | 0.0  |
| 21UR-69680 | 0.0    | 0.0   | 0.0    | 0.0    | 0.0   | 0.0  |
| 21UR-69690 | 0.0    | 0.0   | 0.0    | 0.0    | 0.0   | 0.0  |
| 21UR-6970  | 1.0    | 0.0   | 0.0    | 0.0    | 0.0   | 0.0  |
| 21UR-69700 | 11.0   | 9.0   | 6.0    | 3.0    | 3.0   | 0.0  |
| 21UR-69710 | 1.0    | 1.5   | 1.0    | 0.0    | 0.0   | 0.4  |
| 21UR-69720 | 0.0    | 0.0   | 0.0    | 0.0    | 0.0   | 0.0  |
| 21UR-69730 | 0.0    | 0.0   | 0.0    | 0.0    | 0.0   | 0.0  |
| 21UR-69740 | 0.0    | 0.0   | 0.0    | 0.0    | 0.0   | 0.0  |
| 21UR-69750 | 0.0    | 0.0   | 0.0    | 0.0    | 0.3   | 0.0  |
| 21UR-69760 | 0.0    | 0.0   | 0.0    | 0.0    | 0.0   | 0.0  |
| 21UR-69770 | 8.0    | 0.0   | 1.0    | 2.0    | 0.0   | 0.0  |
| 21UR-69780 | 0.0    | 3.3   | 1.0    | 0.0    | 0.0   | 0.0  |
| 21UR-69790 | 0.0    | 0.0   | 1.0    | 0.0    | 0.0   | 0.0  |
| 21UR-6980  | 3.0    | 43.0  | 7.0    | 4.0    | 36.0  | 1.0  |
| 21UR-69800 | 0.0    | 0.0   | 0.0    | 0.0    | 0.0   | 0.0  |
| 21UR-69810 | 0.0    | 0.0   | 0.0    | 0.0    | 0.0   | 0.0  |
| 21UR-69820 | 0.0    | 0.0   | 0.0    | 0.0    | 0.0   | 0.0  |
| 21UR-69830 | 8.0    | 1.0   | 4.0    | 0.0    | 2.0   | 0.0  |
| 21UR-69840 | 0.0    | 0.0   | 0.0    | 0.0    | 0.0   | 0.0  |
| 21UR-69850 | 0.0    | 0.0   | 0.0    | 0.0    | 0.0   | 0.0  |
| 21UR-69860 | 0.0    | 0.0   | 0.0    | 0.0    | 0.0   | 0.0  |
| 21UR-69870 | 0.0    | 0.0   | 0.0    | 0.0    | 1.0   | 0.0  |

|            |        |       |        |       |       |      |
|------------|--------|-------|--------|-------|-------|------|
| 21UR-69880 | 8.0    | 1.0   | 4.0    | 0.0   | 1.0   | 0.0  |
| 21UR-69890 | 0.0    | 0.0   | 0.0    | 0.0   | 0.0   | 0.0  |
| 21UR-6990  | 0.0    | 1.0   | 0.0    | 0.0   | 2.7   | 0.0  |
| 21UR-69900 | 0.0    | 0.0   | 0.0    | 1.0   | 1.0   | 0.0  |
| 21UR-69910 | 204.5  | 127.0 | 161.0  | 77.0  | 136.5 | 14.0 |
| 21UR-69920 | 14.0   | 6.3   | 14.0   | 4.0   | 26.0  | 0.0  |
| 21UR-69930 | 0.0    | 0.0   | 0.0    | 0.0   | 0.0   | 0.0  |
| 21UR-69940 | 0.0    | 0.0   | 0.0    | 0.0   | 1.0   | 0.0  |
| 21UR-69950 | 16.0   | 0.0   | 8.0    | 0.0   | 4.0   | 0.0  |
| 21UR-69960 | 1.0    | 0.0   | 0.0    | 0.0   | 0.0   | 0.0  |
| 21UR-69970 | 33.5   | 0.0   | 26.0   | 12.0  | 0.0   | 0.0  |
| 21UR-69980 | 3.0    | 4.0   | 2.0    | 0.0   | 13.6  | 2.0  |
| 21UR-69990 | 0.0    | 0.0   | 0.0    | 0.0   | 0.0   | 0.0  |
| 21UR-70    | 1.0    | 1.0   | 1.0    | 0.0   | 4.0   | 0.0  |
| 21UR-700   | 0.0    | 0.0   | 0.0    | 0.0   | 0.0   | 1.0  |
| 21UR-70000 | 0.0    | 0.0   | 0.0    | 0.0   | 0.0   | 0.0  |
| 21UR-70010 | 0.0    | 0.0   | 0.0    | 0.0   | 0.0   | 0.0  |
| 21UR-70020 | 1.0    | 0.0   | 1.0    | 0.0   | 0.0   | 0.0  |
| 21UR-70030 | 4.0    | 0.0   | 6.0    | 1.0   | 1.0   | 0.0  |
| 21UR-70040 | 0.0    | 0.0   | 0.0    | 0.0   | 0.0   | 0.0  |
| 21UR-70050 | 0.0    | 0.0   | 0.0    | 0.0   | 0.0   | 0.0  |
| 21UR-70070 | 0.0    | 0.0   | 0.0    | 0.0   | 0.0   | 0.0  |
| 21UR-70080 | 15.0   | 0.0   | 18.0   | 1.0   | 2.0   | 0.0  |
| 21UR-70090 | 5.0    | 0.5   | 4.0    | 7.0   | 3.0   | 0.0  |
| 21UR-7010  | 7.0    | 4.3   | 7.0    | 2.0   | 18.0  | 0.0  |
| 21UR-70100 | 0.0    | 0.0   | 0.0    | 0.0   | 0.0   | 0.0  |
| 21UR-70110 | 1.0    | 0.0   | 0.0    | 0.0   | 0.0   | 0.0  |
| 21UR-70120 | 6.0    | 0.0   | 5.0    | 1.0   | 1.0   | 0.0  |
| 21UR-70130 | 0.0    | 0.0   | 0.0    | 0.0   | 0.0   | 0.0  |
| 21UR-70140 | 129.0  | 203.0 | 139.0  | 41.7  | 88.0  | 26.0 |
| 21UR-70150 | 0.0    | 0.0   | 0.0    | 0.0   | 0.0   | 0.0  |
| 21UR-70160 | 0.0    | 0.0   | 0.0    | 0.0   | 0.0   | 0.0  |
| 21UR-70170 | 0.0    | 0.0   | 0.0    | 0.0   | 0.0   | 0.0  |
| 21UR-70180 | 0.0    | 0.0   | 0.0    | 0.0   | 0.0   | 0.0  |
| 21UR-70190 | 0.0    | 0.0   | 0.0    | 0.0   | 0.0   | 0.0  |
| 21UR-7020  | 0.0    | 0.0   | 8.0    | 1.0   | 1.0   | 1.0  |
| 21UR-70200 | 0.0    | 0.0   | 0.0    | 0.0   | 0.0   | 0.0  |
| 21UR-70210 | 1.0    | 1.0   | 0.0    | 0.0   | 0.0   | 0.0  |
| 21UR-70220 | 0.0    | 0.0   | 0.0    | 0.0   | 1.0   | 0.0  |
| 21UR-70230 | 0.0    | 0.0   | 1.0    | 0.0   | 0.0   | 0.0  |
| 21UR-70240 | 1.0    | 0.0   | 1.0    | 0.0   | 1.0   | 1.0  |
| 21UR-70250 | 1.0    | 1.0   | 4.0    | 0.0   | 1.0   | 0.0  |
| 21UR-70260 | 0.0    | 1.0   | 0.0    | 0.0   | 0.0   | 0.0  |
| 21UR-70270 | 0.0    | 0.0   | 0.0    | 0.0   | 0.0   | 0.0  |
| 21UR-70280 | 1.0    | 0.0   | 2.0    | 0.0   | 0.0   | 1.0  |
| 21UR-70290 | 21.0   | 8.0   | 42.0   | 7.0   | 7.4   | 0.0  |
| 21UR-7030  | 1138.2 | 56.0  | 802.0  | 83.0  | 47.0  | 32.0 |
| 21UR-70300 | 1.0    | 0.0   | 1.0    | 0.0   | 0.0   | 0.0  |
| 21UR-70310 | 0.0    | 0.0   | 0.0    | 0.0   | 0.0   | 0.0  |
| 21UR-70320 | 1781.5 | 276.0 | 1263.2 | 538.0 | 161.5 | 26.0 |
| 21UR-70330 | 0.0    | 0.0   | 0.0    | 0.0   | 0.0   | 0.0  |

|            |      |      |      |      |      |     |
|------------|------|------|------|------|------|-----|
| 21UR-70340 | 1.0  | 0.1  | 0.0  | 0.0  | 0.0  | 0.0 |
| 21UR-70350 | 2.0  | 0.0  | 4.0  | 0.0  | 0.0  | 0.0 |
| 21UR-70360 | 0.0  | 0.0  | 0.0  | 0.0  | 0.0  | 0.0 |
| 21UR-70370 | 21.0 | 20.0 | 34.0 | 9.0  | 12.0 | 6.0 |
| 21UR-70380 | 0.0  | 0.0  | 0.0  | 0.0  | 0.0  | 0.0 |
| 21UR-70390 | 48.0 | 17.0 | 49.0 | 14.0 | 6.0  | 1.0 |
| 21UR-7040  | 1.0  | 0.0  | 0.0  | 0.0  | 0.0  | 0.0 |
| 21UR-70400 | 0.0  | 0.0  | 0.0  | 0.0  | 0.0  | 0.0 |
| 21UR-70410 | 0.0  | 0.0  | 0.0  | 0.0  | 0.0  | 0.0 |
| 21UR-70420 | 0.0  | 0.0  | 0.0  | 0.0  | 1.0  | 0.0 |
| 21UR-70430 | 11.0 | 0.0  | 1.0  | 1.0  | 0.0  | 0.2 |
| 21UR-70440 | 0.0  | 0.0  | 0.0  | 0.0  | 1.0  | 0.0 |
| 21UR-70450 | 18.0 | 8.0  | 28.0 | 3.0  | 14.0 | 1.0 |
| 21UR-70460 | 0.0  | 0.0  | 0.0  | 0.0  | 0.0  | 0.0 |
| 21UR-70470 | 0.0  | 0.0  | 0.0  | 0.0  | 0.0  | 0.0 |
| 21UR-70480 | 0.0  | 2.0  | 1.0  | 0.0  | 0.0  | 0.0 |
| 21UR-70490 | 8.0  | 0.0  | 4.0  | 3.0  | 0.0  | 0.0 |
| 21UR-7050  | 42.0 | 6.0  | 20.0 | 4.0  | 1.0  | 0.0 |
| 21UR-70500 | 0.0  | 0.0  | 0.0  | 0.0  | 0.0  | 0.0 |
| 21UR-70510 | 1.0  | 0.0  | 0.0  | 0.0  | 0.0  | 0.0 |
| 21UR-70520 | 0.0  | 6.0  | 0.0  | 0.0  | 0.0  | 1.0 |
| 21UR-70530 | 0.0  | 0.0  | 0.0  | 0.0  | 0.0  | 0.0 |
| 21UR-70550 | 4.0  | 2.0  | 0.0  | 0.0  | 4.0  | 0.0 |
| 21UR-70560 | 13.0 | 1.0  | 23.0 | 5.0  | 0.0  | 0.1 |
| 21UR-70570 | 4.0  | 0.0  | 0.0  | 0.0  | 6.0  | 0.0 |
| 21UR-70580 | 0.0  | 0.0  | 1.0  | 0.0  | 1.0  | 0.0 |
| 21UR-70590 | 5.0  | 1.5  | 4.0  | 1.0  | 10.0 | 1.0 |
| 21UR-7060  | 0.0  | 0.0  | 0.0  | 0.0  | 0.0  | 0.0 |
| 21UR-70600 | 4.0  | 0.0  | 0.0  | 0.0  | 0.0  | 0.0 |
| 21UR-70610 | 61.0 | 4.0  | 35.0 | 24.0 | 6.0  | 0.0 |
| 21UR-70620 | 1.0  | 0.0  | 0.0  | 0.0  | 0.0  | 0.0 |
| 21UR-70630 | 6.0  | 7.0  | 1.0  | 1.0  | 1.0  | 4.0 |
| 21UR-70640 | 0.0  | 0.0  | 0.0  | 0.0  | 0.0  | 0.0 |
| 21UR-70650 | 0.0  | 0.0  | 0.0  | 0.0  | 0.0  | 0.0 |
| 21UR-70660 | 0.0  | 0.0  | 0.0  | 0.0  | 1.0  | 0.0 |
| 21UR-70670 | 0.0  | 0.0  | 0.0  | 0.0  | 0.0  | 0.0 |
| 21UR-70680 | 0.0  | 0.0  | 1.0  | 0.0  | 8.0  | 1.0 |
| 21UR-70690 | 0.0  | 0.0  | 0.0  | 0.0  | 0.0  | 0.0 |
| 21UR-7070  | 1.0  | 9.0  | 1.0  | 1.0  | 9.0  | 1.0 |
| 21UR-70700 | 7.0  | 6.1  | 17.0 | 7.0  | 6.0  | 0.0 |
| 21UR-70710 | 64.5 | 42.0 | 66.0 | 16.0 | 42.0 | 2.0 |
| 21UR-70720 | 0.0  | 0.0  | 0.0  | 0.0  | 0.0  | 0.0 |
| 21UR-70730 | 0.0  | 0.0  | 0.0  | 0.0  | 0.0  | 0.0 |
| 21UR-70740 | 0.0  | 0.0  | 1.0  | 0.0  | 0.0  | 0.0 |
| 21UR-70750 | 0.0  | 0.0  | 0.0  | 0.0  | 1.0  | 0.1 |
| 21UR-70760 | 1.0  | 2.0  | 8.0  | 0.0  | 1.0  | 0.0 |
| 21UR-70770 | 0.0  | 1.0  | 0.0  | 0.0  | 0.0  | 0.0 |
| 21UR-70780 | 0.0  | 0.0  | 0.0  | 0.0  | 0.0  | 0.0 |
| 21UR-70790 | 1.0  | 0.0  | 0.0  | 0.0  | 0.0  | 0.0 |
| 21UR-7080  | 70.0 | 2.0  | 40.0 | 8.0  | 0.0  | 1.0 |
| 21UR-70800 | 0.0  | 0.0  | 0.0  | 0.0  | 0.0  | 0.0 |

|            |      |      |      |      |      |     |
|------------|------|------|------|------|------|-----|
| 21UR-70810 | 0.0  | 0.0  | 0.0  | 0.0  | 0.0  | 0.0 |
| 21UR-70820 | 0.0  | 1.0  | 0.0  | 0.0  | 1.0  | 0.0 |
| 21UR-70830 | 0.0  | 0.0  | 0.0  | 0.0  | 0.0  | 0.0 |
| 21UR-70840 | 0.0  | 2.0  | 0.0  | 0.0  | 0.0  | 0.0 |
| 21UR-70850 | 5.0  | 0.0  | 0.0  | 0.0  | 0.0  | 0.0 |
| 21UR-70860 | 4.0  | 0.2  | 0.0  | 0.0  | 0.0  | 0.0 |
| 21UR-70870 | 0.0  | 0.0  | 0.0  | 0.0  | 0.0  | 0.0 |
| 21UR-70880 | 1.0  | 0.0  | 1.0  | 0.0  | 2.0  | 0.0 |
| 21UR-70890 | 0.0  | 0.0  | 0.0  | 0.0  | 0.0  | 0.0 |
| 21UR-7090  | 1.0  | 6.0  | 6.0  | 1.0  | 6.0  | 0.0 |
| 21UR-70900 | 0.0  | 0.0  | 0.0  | 0.0  | 0.0  | 0.0 |
| 21UR-70910 | 4.0  | 0.0  | 1.0  | 0.0  | 1.2  | 1.0 |
| 21UR-70920 | 4.0  | 0.0  | 1.0  | 0.0  | 2.0  | 1.0 |
| 21UR-70930 | 0.0  | 0.0  | 0.0  | 0.0  | 0.0  | 0.0 |
| 21UR-70940 | 4.0  | 4.0  | 1.0  | 0.0  | 0.0  | 0.0 |
| 21UR-70950 | 0.0  | 0.0  | 0.0  | 0.0  | 0.0  | 0.0 |
| 21UR-70960 | 4.0  | 0.0  | 2.0  | 0.0  | 0.0  | 1.0 |
| 21UR-70970 | 0.0  | 0.0  | 0.0  | 0.0  | 0.0  | 0.0 |
| 21UR-70980 | 0.0  | 0.0  | 0.0  | 0.0  | 0.0  | 0.0 |
| 21UR-70990 | 0.0  | 0.0  | 0.0  | 0.0  | 0.0  | 0.0 |
| 21UR-710   | 2.0  | 0.0  | 0.0  | 0.0  | 0.0  | 0.0 |
| 21UR-7100  | 0.0  | 0.0  | 1.0  | 0.0  | 2.0  | 4.0 |
| 21UR-71000 | 4.0  | 4.0  | 4.0  | 1.0  | 0.0  | 0.0 |
| 21UR-71010 | 1.0  | 0.0  | 1.0  | 0.0  | 0.0  | 0.0 |
| 21UR-71020 | 0.0  | 0.0  | 0.0  | 0.0  | 0.0  | 0.0 |
| 21UR-71030 | 16.0 | 0.0  | 10.0 | 6.0  | 0.0  | 0.0 |
| 21UR-71040 | 1.0  | 0.0  | 0.0  | 0.0  | 4.0  | 1.0 |
| 21UR-71050 | 0.0  | 0.0  | 0.0  | 0.0  | 0.0  | 0.0 |
| 21UR-71060 | 0.0  | 0.0  | 1.0  | 0.0  | 2.0  | 0.0 |
| 21UR-71070 | 0.0  | 0.0  | 0.0  | 0.0  | 0.0  | 0.0 |
| 21UR-71080 | 0.0  | 0.0  | 1.0  | 0.0  | 0.0  | 0.0 |
| 21UR-71090 | 53.0 | 0.0  | 38.0 | 10.0 | 6.0  | 0.0 |
| 21UR-7110  | 56.0 | 46.0 | 41.0 | 6.0  | 19.0 | 7.0 |
| 21UR-71100 | 14.0 | 4.0  | 14.0 | 1.0  | 11.0 | 0.0 |
| 21UR-71110 | 0.0  | 1.6  | 0.0  | 0.0  | 0.0  | 0.0 |
| 21UR-71120 | 2.0  | 4.0  | 5.0  | 3.0  | 3.0  | 1.0 |
| 21UR-71130 | 1.0  | 2.0  | 1.0  | 0.0  | 4.0  | 0.0 |
| 21UR-71140 | 0.0  | 0.0  | 0.0  | 0.0  | 1.0  | 0.0 |
| 21UR-71150 | 0.0  | 1.0  | 0.0  | 0.0  | 1.0  | 1.0 |
| 21UR-71160 | 0.0  | 1.0  | 0.0  | 0.0  | 0.0  | 0.0 |
| 21UR-71170 | 0.0  | 0.0  | 0.0  | 0.0  | 0.0  | 0.0 |
| 21UR-71180 | 2.0  | 1.0  | 0.0  | 1.0  | 0.0  | 0.0 |
| 21UR-71190 | 1.0  | 0.0  | 0.0  | 0.0  | 1.0  | 0.0 |
| 21UR-7120  | 6.0  | 6.0  | 12.0 | 4.0  | 8.0  | 1.0 |
| 21UR-71200 | 1.0  | 0.0  | 1.0  | 1.0  | 0.0  | 0.0 |
| 21UR-71210 | 0.0  | 0.0  | 0.0  | 0.0  | 0.0  | 0.0 |
| 21UR-71220 | 0.0  | 0.0  | 0.0  | 0.0  | 1.0  | 1.0 |
| 21UR-71230 | 0.0  | 0.0  | 0.0  | 0.0  | 2.0  | 0.0 |
| 21UR-71240 | 0.0  | 0.0  | 0.0  | 0.0  | 0.0  | 0.0 |
| 21UR-71250 | 1.0  | 1.0  | 0.0  | 0.0  | 0.0  | 0.0 |
| 21UR-71260 | 8.0  | 1.0  | 12.0 | 6.0  | 14.0 | 0.0 |

|            |      |      |      |     |      |     |
|------------|------|------|------|-----|------|-----|
| 21UR-71270 | 1.0  | 1.0  | 0.0  | 0.0 | 1.0  | 0.0 |
| 21UR-71280 | 0.0  | 1.0  | 0.0  | 0.0 | 0.0  | 0.0 |
| 21UR-71290 | 0.0  | 1.0  | 4.0  | 1.0 | 1.0  | 0.0 |
| 21UR-7130  | 0.0  | 0.0  | 0.0  | 0.0 | 0.0  | 0.0 |
| 21UR-71300 | 9.0  | 10.0 | 10.0 | 2.0 | 8.5  | 1.0 |
| 21UR-71310 | 0.0  | 1.0  | 0.0  | 1.0 | 0.0  | 1.0 |
| 21UR-71320 | 0.0  | 0.0  | 0.0  | 0.0 | 0.0  | 0.0 |
| 21UR-71330 | 0.0  | 1.0  | 0.0  | 0.0 | 1.0  | 0.0 |
| 21UR-71340 | 3.0  | 0.0  | 1.0  | 0.0 | 0.0  | 0.0 |
| 21UR-71350 | 0.0  | 3.0  | 0.0  | 0.0 | 10.0 | 1.0 |
| 21UR-71360 | 0.0  | 0.5  | 0.0  | 0.0 | 1.0  | 0.0 |
| 21UR-71370 | 11.0 | 4.0  | 14.0 | 0.0 | 2.0  | 0.0 |
| 21UR-71380 | 0.0  | 0.0  | 0.0  | 0.0 | 0.0  | 0.0 |
| 21UR-71390 | 0.0  | 0.0  | 0.0  | 0.0 | 0.0  | 0.0 |
| 21UR-7140  | 0.0  | 0.0  | 1.0  | 0.0 | 0.0  | 0.0 |
| 21UR-71400 | 0.0  | 0.0  | 0.0  | 1.0 | 0.0  | 0.0 |
| 21UR-71410 | 10.0 | 2.0  | 10.0 | 1.0 | 0.0  | 0.0 |
| 21UR-71420 | 0.0  | 0.0  | 0.0  | 0.0 | 0.0  | 0.0 |
| 21UR-71430 | 0.0  | 0.0  | 1.0  | 0.0 | 0.0  | 0.0 |
| 21UR-71440 | 8.0  | 9.0  | 12.0 | 2.0 | 6.0  | 1.0 |
| 21UR-71450 | 0.0  | 0.0  | 0.0  | 0.0 | 0.0  | 0.0 |
| 21UR-71460 | 0.0  | 0.0  | 0.0  | 0.0 | 0.0  | 0.0 |
| 21UR-71470 | 4.0  | 0.0  | 1.0  | 0.0 | 1.0  | 0.0 |
| 21UR-71480 | 0.0  | 0.0  | 0.0  | 0.0 | 0.0  | 0.0 |
| 21UR-71490 | 0.0  | 0.0  | 0.0  | 0.0 | 0.0  | 0.0 |
| 21UR-71500 | 0.0  | 0.0  | 0.0  | 0.0 | 0.0  | 0.0 |
| 21UR-71510 | 1.0  | 0.0  | 0.0  | 0.0 | 0.0  | 0.0 |
| 21UR-71520 | 0.0  | 1.0  | 0.0  | 0.0 | 0.0  | 0.0 |
| 21UR-71530 | 0.0  | 0.0  | 1.0  | 0.0 | 0.0  | 0.0 |
| 21UR-71540 | 0.0  | 0.0  | 1.0  | 0.0 | 0.0  | 0.0 |
| 21UR-71550 | 4.0  | 0.0  | 0.0  | 0.0 | 1.0  | 0.0 |
| 21UR-71560 | 0.0  | 0.0  | 0.0  | 0.0 | 0.0  | 0.0 |
| 21UR-71570 | 2.0  | 0.0  | 1.0  | 1.0 | 0.0  | 0.0 |
| 21UR-71580 | 0.0  | 0.0  | 0.0  | 0.0 | 0.0  | 0.0 |
| 21UR-71590 | 0.0  | 0.0  | 0.0  | 0.0 | 0.0  | 0.0 |
| 21UR-7160  | 0.0  | 4.0  | 0.0  | 0.0 | 2.0  | 1.0 |
| 21UR-71600 | 0.0  | 0.0  | 0.0  | 0.0 | 0.0  | 0.0 |
| 21UR-71610 | 0.0  | 0.1  | 1.0  | 0.0 | 0.0  | 0.0 |
| 21UR-71620 | 8.0  | 0.0  | 2.0  | 0.0 | 1.0  | 0.0 |
| 21UR-71630 | 0.0  | 0.0  | 0.0  | 0.0 | 0.0  | 0.0 |
| 21UR-71640 | 0.0  | 0.0  | 0.0  | 0.0 | 0.0  | 0.0 |
| 21UR-71650 | 0.0  | 0.0  | 0.0  | 0.0 | 0.0  | 0.0 |
| 21UR-71660 | 0.0  | 0.0  | 0.0  | 0.0 | 0.0  | 0.0 |
| 21UR-71670 | 0.0  | 0.0  | 0.0  | 0.0 | 0.0  | 0.0 |
| 21UR-71680 | 1.0  | 3.2  | 9.0  | 0.5 | 22.0 | 0.0 |
| 21UR-71690 | 0.0  | 0.0  | 0.0  | 0.0 | 0.0  | 0.0 |
| 21UR-7170  | 10.0 | 5.0  | 7.0  | 3.0 | 15.0 | 0.0 |
| 21UR-71700 | 20.0 | 14.0 | 21.0 | 0.0 | 4.0  | 6.0 |
| 21UR-71710 | 0.0  | 0.0  | 6.0  | 0.0 | 1.0  | 1.0 |
| 21UR-71720 | 0.0  | 0.0  | 0.0  | 0.0 | 0.0  | 0.0 |
| 21UR-71730 | 0.0  | 0.0  | 0.0  | 0.0 | 0.0  | 0.0 |

|            |       |       |       |       |       |      |
|------------|-------|-------|-------|-------|-------|------|
| 21UR-71740 | 1.0   | 13.0  | 4.0   | 0.0   | 3.0   | 0.0  |
| 21UR-71750 | 1.0   | 0.0   | 5.0   | 0.0   | 2.0   | 0.0  |
| 21UR-71760 | 0.0   | 0.0   | 1.0   | 0.0   | 1.0   | 0.0  |
| 21UR-71770 | 0.0   | 0.0   | 0.0   | 0.0   | 0.0   | 0.0  |
| 21UR-71780 | 9.5   | 0.0   | 9.0   | 4.0   | 6.0   | 0.0  |
| 21UR-71790 | 10.0  | 0.0   | 9.0   | 8.0   | 2.0   | 0.0  |
| 21UR-7180  | 103.0 | 0.0   | 86.0  | 27.0  | 13.0  | 4.0  |
| 21UR-71800 | 0.0   | 0.0   | 0.0   | 0.0   | 4.0   | 0.0  |
| 21UR-71810 | 0.0   | 0.0   | 0.0   | 0.0   | 0.0   | 0.0  |
| 21UR-71820 | 0.0   | 0.0   | 1.0   | 0.0   | 0.0   | 0.0  |
| 21UR-71830 | 0.0   | 0.0   | 0.0   | 0.0   | 1.0   | 0.0  |
| 21UR-71840 | 0.0   | 1.0   | 1.0   | 1.0   | 0.0   | 0.0  |
| 21UR-71850 | 0.0   | 4.0   | 0.0   | 0.0   | 4.0   | 0.0  |
| 21UR-71860 | 0.0   | 1.0   | 0.0   | 0.0   | 0.0   | 0.0  |
| 21UR-71870 | 0.0   | 0.0   | 0.0   | 0.0   | 0.0   | 0.0  |
| 21UR-71880 | 0.0   | 1.0   | 0.0   | 0.0   | 1.0   | 0.0  |
| 21UR-71890 | 0.0   | 0.0   | 0.0   | 0.0   | 0.0   | 0.0  |
| 21UR-7190  | 1.0   | 3.0   | 0.0   | 0.0   | 3.0   | 0.0  |
| 21UR-71900 | 6.0   | 2.0   | 8.0   | 1.0   | 0.0   | 0.0  |
| 21UR-71910 | 0.0   | 0.0   | 0.0   | 0.0   | 0.0   | 0.0  |
| 21UR-71920 | 202.0 | 257.0 | 270.0 | 73.0  | 58.5  | 52.0 |
| 21UR-71930 | 33.0  | 3.0   | 20.0  | 8.0   | 1.0   | 0.0  |
| 21UR-71940 | 6.0   | 4.0   | 2.0   | 1.0   | 33.5  | 3.0  |
| 21UR-71950 | 0.0   | 0.0   | 0.0   | 0.0   | 0.0   | 0.0  |
| 21UR-71960 | 0.0   | 0.0   | 0.0   | 0.0   | 0.0   | 0.0  |
| 21UR-71970 | 0.0   | 0.0   | 0.0   | 0.0   | 0.0   | 0.0  |
| 21UR-71980 | 0.0   | 0.0   | 0.0   | 0.0   | 0.0   | 0.0  |
| 21UR-71990 | 222.5 | 13.0  | 173.0 | 37.0  | 9.7   | 5.0  |
| 21UR-720   | 6.0   | 14.0  | 7.0   | 1.0   | 30.0  | 0.0  |
| 21UR-7200  | 0.0   | 0.0   | 0.0   | 0.0   | 1.0   | 0.0  |
| 21UR-72000 | 1.0   | 3.2   | 6.0   | 0.5   | 18.0  | 0.0  |
| 21UR-72010 | 3.0   | 8.0   | 5.0   | 2.0   | 32.5  | 2.0  |
| 21UR-72020 | 0.0   | 0.0   | 0.0   | 0.0   | 0.0   | 0.0  |
| 21UR-72030 | 0.0   | 1.0   | 0.0   | 0.0   | 0.0   | 0.0  |
| 21UR-72040 | 0.0   | 0.0   | 3.0   | 0.0   | 1.0   | 0.0  |
| 21UR-72050 | 0.0   | 0.0   | 1.0   | 0.0   | 1.0   | 0.0  |
| 21UR-72060 | 0.0   | 0.0   | 0.0   | 0.0   | 0.0   | 0.0  |
| 21UR-72070 | 0.0   | 0.0   | 0.0   | 0.0   | 0.0   | 0.0  |
| 21UR-72080 | 6.0   | 0.0   | 6.0   | 3.0   | 1.0   | 1.0  |
| 21UR-72090 | 1.0   | 1.0   | 6.0   | 0.0   | 1.0   | 0.0  |
| 21UR-7210  | 32.0  | 6.0   | 26.0  | 4.0   | 6.0   | 0.0  |
| 21UR-72100 | 1.0   | 1.0   | 0.0   | 0.0   | 0.0   | 0.0  |
| 21UR-72110 | 4.0   | 2.0   | 1.0   | 1.0   | 0.0   | 1.0  |
| 21UR-72120 | 0.0   | 0.0   | 0.0   | 0.0   | 0.0   | 0.0  |
| 21UR-72130 | 0.0   | 0.0   | 0.0   | 0.0   | 0.0   | 0.0  |
| 21UR-72140 | 865.0 | 148.0 | 638.0 | 483.0 | 648.4 | 18.0 |
| 21UR-72150 | 0.0   | 0.0   | 0.0   | 0.0   | 0.0   | 0.0  |
| 21UR-72160 | 0.0   | 0.0   | 0.0   | 1.0   | 0.0   | 0.0  |
| 21UR-72170 | 9.0   | 0.0   | 1.0   | 0.0   | 0.0   | 0.0  |
| 21UR-72180 | 0.0   | 1.0   | 0.0   | 0.0   | 0.0   | 0.0  |
| 21UR-72190 | 0.0   | 0.0   | 0.0   | 0.0   | 0.0   | 0.0  |

|            |       |       |       |       |       |      |
|------------|-------|-------|-------|-------|-------|------|
| 21UR-7220  | 11.0  | 4.0   | 26.0  | 9.0   | 22.0  | 0.0  |
| 21UR-72200 | 0.0   | 0.0   | 0.0   | 0.0   | 0.0   | 0.0  |
| 21UR-72210 | 0.0   | 0.0   | 0.0   | 0.0   | 0.0   | 0.0  |
| 21UR-72220 | 0.0   | 1.0   | 1.0   | 0.0   | 1.0   | 0.0  |
| 21UR-72230 | 0.0   | 0.0   | 0.0   | 0.0   | 0.0   | 0.0  |
| 21UR-72240 | 0.0   | 0.0   | 1.0   | 2.0   | 0.0   | 0.0  |
| 21UR-72250 | 220.0 | 256.0 | 294.0 | 90.0  | 174.7 | 24.0 |
| 21UR-72260 | 0.0   | 0.0   | 0.0   | 0.0   | 0.0   | 0.0  |
| 21UR-72270 | 16.0  | 1.0   | 4.0   | 1.0   | 0.0   | 0.0  |
| 21UR-72280 | 0.0   | 0.0   | 0.0   | 0.0   | 0.0   | 0.0  |
| 21UR-72290 | 0.0   | 1.0   | 0.0   | 0.0   | 0.0   | 0.0  |
| 21UR-7230  | 0.0   | 0.0   | 0.0   | 0.0   | 0.0   | 0.0  |
| 21UR-72300 | 0.0   | 0.0   | 0.0   | 0.0   | 0.0   | 0.0  |
| 21UR-72310 | 0.0   | 0.0   | 2.0   | 0.0   | 0.0   | 0.0  |
| 21UR-72320 | 0.0   | 0.0   | 0.0   | 0.0   | 0.0   | 0.0  |
| 21UR-72330 | 0.0   | 0.0   | 4.0   | 0.0   | 1.0   | 0.0  |
| 21UR-72340 | 0.0   | 0.0   | 0.0   | 0.0   | 0.0   | 0.0  |
| 21UR-72350 | 37.0  | 9.1   | 22.0  | 11.0  | 4.0   | 0.0  |
| 21UR-72360 | 0.0   | 0.0   | 0.0   | 0.0   | 0.0   | 0.0  |
| 21UR-72370 | 0.0   | 0.0   | 0.0   | 0.0   | 4.0   | 0.0  |
| 21UR-72380 | 0.0   | 0.0   | 0.0   | 0.0   | 0.0   | 0.0  |
| 21UR-72390 | 0.0   | 0.0   | 0.0   | 0.0   | 0.0   | 0.0  |
| 21UR-7240  | 12.0  | 3.0   | 11.0  | 1.0   | 2.0   | 0.0  |
| 21UR-72400 | 1.0   | 0.0   | 14.0  | 4.0   | 0.0   | 0.0  |
| 21UR-72410 | 0.0   | 2.0   | 1.0   | 0.0   | 2.0   | 0.0  |
| 21UR-72420 | 0.0   | 0.0   | 1.0   | 0.0   | 1.0   | 0.0  |
| 21UR-72430 | 1.0   | 4.0   | 4.0   | 1.0   | 4.0   | 0.0  |
| 21UR-72440 | 0.0   | 0.0   | 1.0   | 0.0   | 0.0   | 0.1  |
| 21UR-72450 | 262.0 | 128.0 | 228.0 | 164.0 | 209.0 | 2.0  |
| 21UR-72460 | 0.0   | 3.0   | 0.0   | 0.0   | 9.1   | 1.0  |
| 21UR-72470 | 0.0   | 4.0   | 0.0   | 0.0   | 0.0   | 0.0  |
| 21UR-72480 | 18.0  | 0.0   | 22.0  | 1.0   | 4.0   | 0.0  |
| 21UR-72490 | 2.0   | 0.0   | 0.0   | 0.0   | 0.0   | 0.0  |
| 21UR-7250  | 0.0   | 0.0   | 0.0   | 0.0   | 1.0   | 0.0  |
| 21UR-72500 | 10.0  | 0.0   | 0.0   | 1.0   | 6.5   | 1.0  |
| 21UR-72510 | 0.0   | 0.0   | 0.0   | 0.0   | 1.0   | 0.0  |
| 21UR-72520 | 0.0   | 0.0   | 0.0   | 0.0   | 0.0   | 0.0  |
| 21UR-72530 | 1.0   | 3.5   | 0.0   | 0.0   | 3.0   | 0.0  |
| 21UR-72540 | 13.0  | 1.0   | 16.0  | 2.0   | 6.0   | 3.0  |
| 21UR-72550 | 2.0   | 1.0   | 2.0   | 1.0   | 0.0   | 0.0  |
| 21UR-72560 | 0.0   | 2.0   | 0.0   | 0.0   | 0.0   | 0.0  |
| 21UR-72570 | 0.0   | 0.0   | 0.0   | 0.0   | 0.0   | 0.0  |
| 21UR-72580 | 0.0   | 0.0   | 0.0   | 0.0   | 0.0   | 0.0  |
| 21UR-72590 | 0.0   | 0.0   | 0.0   | 0.0   | 0.0   | 0.0  |
| 21UR-7260  | 165.0 | 10.0  | 151.5 | 73.0  | 26.0  | 1.0  |
| 21UR-72600 | 8.0   | 4.0   | 1.0   | 0.0   | 3.0   | 1.0  |
| 21UR-72610 | 38.0  | 1.0   | 50.0  | 10.0  | 2.0   | 0.0  |
| 21UR-72620 | 1.0   | 0.0   | 0.0   | 0.0   | 0.0   | 0.0  |
| 21UR-72630 | 0.0   | 0.0   | 0.0   | 0.0   | 0.0   | 0.0  |
| 21UR-72640 | 0.0   | 0.0   | 0.0   | 0.0   | 0.0   | 0.0  |
| 21UR-72650 | 0.0   | 0.0   | 0.0   | 0.0   | 0.0   | 0.0  |

|            |       |      |       |       |      |     |
|------------|-------|------|-------|-------|------|-----|
| 21UR-72660 | 6.0   | 2.0  | 4.0   | 0.0   | 15.0 | 0.0 |
| 21UR-72670 | 3.5   | 0.0  | 5.0   | 0.0   | 0.0  | 0.0 |
| 21UR-72680 | 0.0   | 0.0  | 0.0   | 0.0   | 0.0  | 0.0 |
| 21UR-72690 | 9.0   | 0.0  | 13.0  | 4.0   | 1.0  | 0.0 |
| 21UR-7270  | 1.0   | 0.0  | 2.0   | 0.0   | 0.0  | 0.0 |
| 21UR-72700 | 29.0  | 0.0  | 23.0  | 15.0  | 12.0 | 0.0 |
| 21UR-72710 | 3.5   | 0.0  | 0.0   | 0.0   | 0.0  | 0.0 |
| 21UR-72720 | 0.0   | 1.0  | 0.0   | 0.0   | 2.0  | 0.0 |
| 21UR-72730 | 3.0   | 0.0  | 5.0   | 1.0   | 0.0  | 0.0 |
| 21UR-72740 | 32.0  | 0.0  | 18.0  | 3.0   | 4.0  | 0.0 |
| 21UR-72750 | 2.0   | 2.0  | 1.0   | 0.0   | 2.0  | 0.0 |
| 21UR-72760 | 0.0   | 0.0  | 0.0   | 0.0   | 0.0  | 0.0 |
| 21UR-72770 | 10.0  | 9.0  | 3.0   | 3.0   | 3.0  | 0.0 |
| 21UR-72780 | 15.0  | 0.0  | 3.0   | 10.0  | 7.0  | 0.0 |
| 21UR-72790 | 1.0   | 0.0  | 0.0   | 0.0   | 1.0  | 0.0 |
| 21UR-7280  | 0.0   | 0.0  | 0.0   | 0.0   | 0.0  | 0.0 |
| 21UR-72800 | 20.0  | 0.0  | 17.0  | 4.0   | 2.0  | 0.0 |
| 21UR-72810 | 0.0   | 0.0  | 0.0   | 0.0   | 0.0  | 0.0 |
| 21UR-72820 | 1.0   | 0.0  | 1.0   | 0.0   | 1.0  | 0.0 |
| 21UR-72830 | 0.0   | 0.5  | 0.0   | 0.0   | 0.0  | 0.0 |
| 21UR-72840 | 0.0   | 1.0  | 0.0   | 0.0   | 0.0  | 0.0 |
| 21UR-72850 | 0.0   | 0.0  | 0.0   | 0.0   | 0.0  | 0.0 |
| 21UR-72860 | 1.0   | 2.0  | 0.0   | 0.0   | 0.0  | 0.0 |
| 21UR-72870 | 0.0   | 0.0  | 0.0   | 1.0   | 1.0  | 0.0 |
| 21UR-72880 | 4.0   | 0.0  | 8.0   | 1.0   | 10.0 | 0.0 |
| 21UR-72890 | 0.0   | 0.0  | 0.0   | 0.0   | 0.0  | 0.0 |
| 21UR-7290  | 6.0   | 4.0  | 8.0   | 0.0   | 8.0  | 0.0 |
| 21UR-72900 | 0.0   | 0.0  | 0.0   | 0.0   | 0.0  | 0.0 |
| 21UR-72910 | 0.0   | 0.0  | 0.0   | 0.0   | 0.0  | 0.0 |
| 21UR-72920 | 0.0   | 0.0  | 0.0   | 0.0   | 0.0  | 0.0 |
| 21UR-72930 | 0.0   | 0.0  | 0.0   | 0.0   | 0.0  | 0.0 |
| 21UR-72940 | 1.0   | 0.0  | 1.0   | 0.0   | 1.0  | 0.0 |
| 21UR-72950 | 1.0   | 0.0  | 4.0   | 1.0   | 0.0  | 0.0 |
| 21UR-72960 | 0.0   | 2.0  | 0.0   | 0.0   | 0.0  | 0.0 |
| 21UR-72970 | 0.0   | 0.0  | 0.0   | 0.0   | 0.0  | 0.0 |
| 21UR-72980 | 1.0   | 0.0  | 0.0   | 0.0   | 0.4  | 0.0 |
| 21UR-72990 | 0.0   | 0.0  | 1.0   | 1.0   | 1.0  | 0.0 |
| 21UR-730   | 30.0  | 7.0  | 10.0  | 0.0   | 3.5  | 0.0 |
| 21UR-7300  | 8.0   | 0.0  | 7.0   | 1.0   | 0.0  | 0.0 |
| 21UR-73000 | 0.0   | 0.0  | 0.0   | 0.0   | 4.0  | 0.0 |
| 21UR-73010 | 0.0   | 1.0  | 0.0   | 0.0   | 0.0  | 0.0 |
| 21UR-73020 | 0.0   | 0.0  | 0.0   | 0.0   | 0.0  | 0.0 |
| 21UR-73030 | 0.0   | 0.0  | 0.0   | 0.0   | 0.0  | 0.0 |
| 21UR-73040 | 5.0   | 0.0  | 1.0   | 0.0   | 0.0  | 0.0 |
| 21UR-73050 | 8.0   | 4.0  | 12.0  | 0.0   | 3.0  | 0.0 |
| 21UR-73060 | 0.0   | 1.0  | 1.0   | 0.0   | 0.0  | 0.0 |
| 21UR-73070 | 0.0   | 0.0  | 0.0   | 0.0   | 0.0  | 0.0 |
| 21UR-73080 | 0.0   | 1.0  | 0.0   | 0.0   | 0.0  | 0.0 |
| 21UR-73090 | 0.0   | 0.0  | 4.0   | 0.0   | 0.0  | 0.0 |
| 21UR-7310  | 0.0   | 0.0  | 1.0   | 0.0   | 0.0  | 0.0 |
| 21UR-73100 | 764.5 | 35.0 | 504.0 | 115.0 | 37.0 | 8.0 |



|            |      |     |      |      |      |     |
|------------|------|-----|------|------|------|-----|
| 21UR-73110 | 25.0 | 2.0 | 27.0 | 1.0  | 8.0  | 0.0 |
| 21UR-73120 | 22.0 | 0.0 | 23.0 | 1.0  | 1.0  | 0.0 |
| 21UR-73130 | 0.0  | 0.0 | 0.0  | 0.0  | 1.0  | 0.0 |
| 21UR-73140 | 1.0  | 0.0 | 0.0  | 0.0  | 0.0  | 0.0 |
| 21UR-73150 | 0.0  | 0.0 | 0.0  | 0.0  | 0.0  | 0.0 |
| 21UR-73160 | 0.0  | 1.0 | 0.0  | 0.0  | 1.0  | 0.0 |
| 21UR-73170 | 1.0  | 0.0 | 0.0  | 0.0  | 0.0  | 0.0 |
| 21UR-73180 | 6.0  | 6.0 | 4.0  | 1.0  | 15.7 | 1.0 |
| 21UR-73190 | 0.0  | 0.0 | 0.0  | 0.0  | 0.0  | 0.0 |
| 21UR-7320  | 4.0  | 6.0 | 3.0  | 0.0  | 6.0  | 0.0 |
| 21UR-73200 | 0.0  | 0.0 | 0.0  | 1.0  | 0.0  | 0.0 |
| 21UR-73210 | 0.0  | 1.0 | 0.0  | 0.0  | 0.0  | 0.0 |
| 21UR-73220 | 0.0  | 1.0 | 0.0  | 0.0  | 6.0  | 0.0 |
| 21UR-73230 | 0.0  | 0.0 | 3.0  | 0.0  | 0.0  | 0.0 |
| 21UR-73240 | 2.0  | 4.0 | 0.0  | 0.0  | 0.0  | 0.0 |
| 21UR-73250 | 0.0  | 0.0 | 0.0  | 0.0  | 0.0  | 0.0 |
| 21UR-73260 | 0.0  | 0.0 | 0.0  | 1.0  | 0.0  | 0.0 |
| 21UR-73270 | 0.0  | 0.0 | 1.0  | 0.0  | 0.0  | 0.0 |
| 21UR-73280 | 20.0 | 5.0 | 11.0 | 4.0  | 22.0 | 1.0 |
| 21UR-73290 | 0.0  | 6.0 | 0.0  | 0.0  | 1.0  | 0.0 |
| 21UR-7330  | 4.0  | 0.0 | 7.0  | 0.0  | 24.0 | 0.0 |
| 21UR-73300 | 0.0  | 0.0 | 0.0  | 0.0  | 0.0  | 0.0 |
| 21UR-73310 | 2.0  | 0.0 | 1.0  | 0.0  | 0.0  | 0.0 |
| 21UR-73320 | 0.0  | 0.0 | 0.0  | 0.0  | 0.0  | 0.0 |
| 21UR-73330 | 0.0  | 0.0 | 0.0  | 0.0  | 4.0  | 0.1 |
| 21UR-73340 | 1.0  | 2.0 | 1.0  | 0.0  | 8.0  | 0.0 |
| 21UR-73350 | 0.0  | 0.0 | 0.0  | 0.0  | 0.0  | 0.0 |
| 21UR-73360 | 0.0  | 0.0 | 0.0  | 0.0  | 0.0  | 0.0 |
| 21UR-73370 | 0.0  | 0.0 | 4.0  | 1.0  | 0.0  | 0.0 |
| 21UR-73380 | 0.0  | 0.0 | 0.0  | 0.0  | 0.0  | 0.0 |
| 21UR-73390 | 1.0  | 0.0 | 1.0  | 0.0  | 0.0  | 0.0 |
| 21UR-7340  | 0.0  | 0.0 | 0.0  | 0.0  | 0.0  | 0.0 |
| 21UR-73400 | 0.0  | 1.0 | 0.0  | 0.0  | 0.0  | 0.0 |
| 21UR-73410 | 0.0  | 0.0 | 0.0  | 0.0  | 0.0  | 1.0 |
| 21UR-73420 | 0.0  | 0.0 | 0.0  | 0.0  | 1.0  | 0.0 |
| 21UR-73430 | 49.0 | 3.0 | 54.0 | 23.0 | 15.0 | 0.0 |
| 21UR-73440 | 0.0  | 1.0 | 2.0  | 0.0  | 2.0  | 0.0 |
| 21UR-73450 | 0.0  | 1.0 | 1.0  | 0.0  | 0.0  | 0.0 |
| 21UR-73460 | 0.0  | 0.0 | 0.0  | 0.0  | 0.0  | 0.0 |
| 21UR-73470 | 19.0 | 1.0 | 19.0 | 8.0  | 0.0  | 0.0 |
| 21UR-73480 | 92.0 | 6.0 | 75.0 | 19.0 | 17.0 | 2.0 |
| 21UR-73490 | 0.0  | 4.0 | 4.0  | 1.0  | 0.0  | 1.0 |
| 21UR-7350  | 41.0 | 2.0 | 53.0 | 18.0 | 4.0  | 0.0 |
| 21UR-73500 | 15.0 | 2.0 | 12.0 | 1.0  | 1.0  | 0.0 |
| 21UR-73510 | 4.0  | 0.0 | 10.0 | 5.0  | 0.0  | 0.0 |
| 21UR-73520 | 0.0  | 0.0 | 0.0  | 1.0  | 0.0  | 0.0 |
| 21UR-73530 | 0.0  | 0.0 | 1.0  | 0.0  | 0.0  | 0.0 |
| 21UR-73540 | 1.0  | 3.0 | 5.0  | 0.5  | 3.0  | 2.0 |
| 21UR-73550 | 0.0  | 0.0 | 0.0  | 0.0  | 0.0  | 0.0 |
| 21UR-73560 | 0.0  | 0.0 | 0.0  | 0.0  | 0.0  | 0.3 |
| 21UR-73570 | 2.0  | 2.0 | 4.0  | 1.0  | 0.0  | 0.0 |

|            |       |       |       |       |       |      |
|------------|-------|-------|-------|-------|-------|------|
| 21UR-73580 | 0.0   | 0.0   | 0.0   | 0.0   | 0.0   | 0.0  |
| 21UR-7360  | 136.0 | 37.0  | 120.5 | 45.0  | 56.0  | 9.0  |
| 21UR-73600 | 0.0   | 0.0   | 1.0   | 0.0   | 0.0   | 0.0  |
| 21UR-73610 | 4.0   | 0.0   | 0.0   | 0.0   | 2.0   | 0.0  |
| 21UR-73620 | 1.0   | 6.0   | 0.0   | 5.0   | 5.0   | 0.0  |
| 21UR-73630 | 0.0   | 0.0   | 0.0   | 0.0   | 0.0   | 0.0  |
| 21UR-73640 | 0.0   | 0.0   | 0.0   | 0.0   | 0.0   | 0.0  |
| 21UR-73650 | 0.0   | 0.0   | 0.0   | 0.0   | 0.0   | 0.0  |
| 21UR-73660 | 105.5 | 16.0  | 78.5  | 55.0  | 44.5  | 2.0  |
| 21UR-73670 | 0.0   | 0.2   | 0.0   | 0.0   | 0.0   | 0.0  |
| 21UR-73680 | 1.0   | 0.0   | 0.0   | 0.0   | 0.0   | 0.0  |
| 21UR-73690 | 0.0   | 0.0   | 0.0   | 0.0   | 0.0   | 0.0  |
| 21UR-7370  | 19.0  | 1.0   | 21.0  | 0.0   | 9.0   | 0.0  |
| 21UR-73700 | 759.0 | 157.0 | 717.0 | 430.0 | 180.0 | 30.0 |
| 21UR-73710 | 4.0   | 0.0   | 0.0   | 0.0   | 0.0   | 0.0  |
| 21UR-73720 | 0.0   | 0.0   | 0.0   | 0.0   | 0.0   | 0.0  |
| 21UR-73730 | 0.0   | 0.0   | 0.0   | 0.0   | 0.0   | 0.0  |
| 21UR-73740 | 0.0   | 4.0   | 0.0   | 1.0   | 1.0   | 0.0  |
| 21UR-73750 | 0.0   | 0.0   | 0.0   | 0.0   | 0.0   | 0.0  |
| 21UR-73760 | 0.0   | 0.0   | 0.0   | 0.0   | 0.0   | 0.0  |
| 21UR-73770 | 0.0   | 0.0   | 0.0   | 0.0   | 0.0   | 0.0  |
| 21UR-73780 | 14.0  | 0.0   | 0.0   | 0.0   | 0.0   | 0.0  |
| 21UR-73790 | 26.0  | 7.0   | 27.0  | 8.0   | 9.0   | 6.0  |
| 21UR-7380  | 0.0   | 4.0   | 0.0   | 0.0   | 1.0   | 0.0  |
| 21UR-73800 | 0.0   | 0.0   | 0.0   | 0.0   | 0.0   | 0.0  |
| 21UR-73810 | 7.1   | 2.0   | 12.0  | 6.0   | 2.0   | 0.0  |
| 21UR-73820 | 0.0   | 0.0   | 0.0   | 0.0   | 0.0   | 0.0  |
| 21UR-73830 | 0.0   | 0.0   | 0.0   | 0.0   | 0.0   | 0.0  |
| 21UR-73840 | 0.0   | 0.0   | 0.0   | 0.0   | 0.0   | 0.0  |
| 21UR-73850 | 0.0   | 0.0   | 0.0   | 0.0   | 0.0   | 0.0  |
| 21UR-73860 | 0.0   | 1.0   | 3.0   | 0.0   | 8.0   | 0.0  |
| 21UR-73870 | 0.0   | 0.0   | 0.0   | 0.0   | 0.0   | 1.0  |
| 21UR-73880 | 1.0   | 0.0   | 1.0   | 0.0   | 0.0   | 0.0  |
| 21UR-73890 | 0.0   | 0.0   | 0.0   | 0.0   | 0.0   | 0.0  |
| 21UR-7390  | 8.0   | 1.0   | 4.0   | 0.0   | 4.7   | 0.0  |
| 21UR-73900 | 0.0   | 0.0   | 0.0   | 0.0   | 0.0   | 0.0  |
| 21UR-73910 | 2.0   | 0.0   | 5.0   | 2.0   | 4.0   | 0.0  |
| 21UR-73920 | 0.0   | 0.0   | 1.0   | 0.0   | 0.0   | 0.0  |
| 21UR-73930 | 28.0  | 31.0  | 44.0  | 21.0  | 32.0  | 0.0  |
| 21UR-73940 | 0.0   | 0.0   | 0.0   | 1.0   | 0.0   | 0.0  |
| 21UR-73950 | 0.0   | 1.0   | 1.0   | 0.0   | 4.0   | 1.0  |
| 21UR-73960 | 0.0   | 0.0   | 4.0   | 0.0   | 0.0   | 0.0  |
| 21UR-73970 | 0.0   | 0.0   | 0.0   | 0.0   | 0.0   | 0.0  |
| 21UR-73980 | 0.0   | 0.0   | 0.0   | 0.0   | 1.0   | 0.0  |
| 21UR-73990 | 1.0   | 0.0   | 0.0   | 0.0   | 1.0   | 0.0  |
| 21UR-740   | 33.0  | 3.0   | 17.0  | 12.0  | 8.0   | 1.0  |
| 21UR-7400  | 1.0   | 1.0   | 0.0   | 1.0   | 12.0  | 0.0  |
| 21UR-74000 | 0.0   | 0.0   | 4.0   | 0.0   | 0.0   | 0.0  |
| 21UR-74010 | 10.0  | 1.0   | 4.0   | 1.0   | 1.0   | 0.0  |
| 21UR-74020 | 0.0   | 0.0   | 1.0   | 0.0   | 1.0   | 0.0  |
| 21UR-74030 | 0.0   | 0.0   | 0.0   | 0.0   | 0.0   | 0.0  |

|            |      |      |      |      |      |     |
|------------|------|------|------|------|------|-----|
| 21UR-74040 | 0.0  | 0.0  | 0.0  | 0.0  | 0.0  | 0.0 |
| 21UR-74050 | 0.0  | 0.0  | 0.0  | 0.0  | 0.0  | 1.0 |
| 21UR-74070 | 0.0  | 0.0  | 0.0  | 0.0  | 0.0  | 0.0 |
| 21UR-74080 | 0.0  | 0.0  | 0.0  | 0.0  | 1.0  | 0.0 |
| 21UR-74090 | 0.0  | 0.0  | 0.0  | 0.0  | 0.0  | 0.0 |
| 21UR-7410  | 0.0  | 3.0  | 0.0  | 0.0  | 2.0  | 0.0 |
| 21UR-74100 | 1.0  | 2.0  | 1.0  | 0.0  | 0.0  | 0.0 |
| 21UR-74110 | 0.0  | 0.0  | 0.0  | 1.0  | 0.0  | 0.0 |
| 21UR-74120 | 0.0  | 0.0  | 0.0  | 0.0  | 0.0  | 0.0 |
| 21UR-74130 | 0.0  | 0.0  | 0.0  | 0.0  | 0.0  | 0.0 |
| 21UR-74140 | 0.0  | 0.0  | 0.0  | 0.0  | 0.0  | 0.0 |
| 21UR-74150 | 1.0  | 0.0  | 0.0  | 0.0  | 0.0  | 0.0 |
| 21UR-74160 | 6.0  | 0.0  | 1.0  | 0.0  | 0.0  | 0.0 |
| 21UR-74170 | 0.0  | 0.0  | 0.0  | 0.0  | 0.0  | 0.0 |
| 21UR-74180 | 0.0  | 1.0  | 0.0  | 0.0  | 0.3  | 0.1 |
| 21UR-74190 | 0.0  | 0.0  | 4.0  | 0.0  | 0.0  | 0.0 |
| 21UR-7420  | 20.0 | 13.0 | 31.0 | 0.0  | 6.0  | 1.0 |
| 21UR-74200 | 0.0  | 0.0  | 0.0  | 0.0  | 0.0  | 0.0 |
| 21UR-74210 | 35.0 | 9.0  | 38.0 | 8.0  | 21.0 | 4.0 |
| 21UR-74220 | 0.0  | 0.0  | 0.0  | 0.0  | 0.0  | 0.0 |
| 21UR-74230 | 0.0  | 0.0  | 0.0  | 0.0  | 0.0  | 0.0 |
| 21UR-74240 | 0.0  | 0.0  | 0.0  | 0.0  | 0.0  | 0.0 |
| 21UR-74250 | 0.0  | 0.0  | 0.0  | 0.0  | 0.0  | 0.0 |
| 21UR-74260 | 0.0  | 1.0  | 0.0  | 0.0  | 0.0  | 0.0 |
| 21UR-74270 | 0.0  | 0.0  | 1.0  | 0.0  | 1.0  | 0.0 |
| 21UR-74280 | 4.0  | 0.0  | 1.0  | 0.0  | 0.1  | 0.0 |
| 21UR-74290 | 6.0  | 3.1  | 4.0  | 2.0  | 1.0  | 0.0 |
| 21UR-7430  | 0.0  | 0.0  | 0.0  | 0.0  | 0.0  | 0.0 |
| 21UR-74300 | 0.0  | 0.0  | 0.0  | 0.0  | 0.0  | 0.0 |
| 21UR-74310 | 0.0  | 0.0  | 0.0  | 0.0  | 0.0  | 0.0 |
| 21UR-74320 | 0.0  | 0.0  | 0.0  | 0.0  | 0.0  | 0.0 |
| 21UR-74330 | 0.0  | 0.0  | 1.0  | 0.0  | 0.0  | 0.0 |
| 21UR-74340 | 0.0  | 0.0  | 0.0  | 0.0  | 0.0  | 0.0 |
| 21UR-74350 | 1.0  | 1.0  | 0.0  | 0.0  | 1.0  | 0.0 |
| 21UR-74360 | 45.0 | 4.0  | 21.0 | 25.0 | 19.0 | 0.0 |
| 21UR-74370 | 0.0  | 0.0  | 8.0  | 0.0  | 6.0  | 0.0 |
| 21UR-74380 | 0.0  | 14.0 | 1.0  | 1.0  | 7.0  | 4.0 |
| 21UR-74390 | 0.0  | 0.0  | 0.0  | 0.0  | 0.0  | 0.0 |
| 21UR-7440  | 16.0 | 2.0  | 16.0 | 5.0  | 9.0  | 0.0 |
| 21UR-74400 | 8.0  | 0.0  | 6.0  | 0.0  | 1.0  | 0.0 |
| 21UR-74410 | 0.0  | 0.0  | 0.0  | 0.0  | 0.0  | 0.0 |
| 21UR-74420 | 0.0  | 0.0  | 0.0  | 0.0  | 0.0  | 0.0 |
| 21UR-74430 | 0.0  | 0.0  | 0.0  | 0.0  | 0.0  | 0.0 |
| 21UR-74440 | 0.0  | 0.0  | 0.0  | 0.0  | 1.0  | 0.0 |
| 21UR-74450 | 0.0  | 0.0  | 2.0  | 0.0  | 11.0 | 0.0 |
| 21UR-74460 | 0.0  | 0.0  | 0.0  | 0.0  | 0.0  | 0.0 |
| 21UR-74470 | 0.0  | 0.0  | 0.0  | 0.0  | 0.0  | 0.0 |
| 21UR-74480 | 10.0 | 8.0  | 6.0  | 2.0  | 25.0 | 1.0 |
| 21UR-74490 | 4.0  | 0.0  | 1.0  | 0.0  | 0.0  | 0.0 |
| 21UR-7450  | 0.0  | 0.0  | 0.0  | 0.0  | 0.0  | 0.0 |
| 21UR-74500 | 1.0  | 0.0  | 0.0  | 0.0  | 0.0  | 0.0 |

|            |       |       |       |       |       |      |
|------------|-------|-------|-------|-------|-------|------|
| 21UR-74510 | 3.0   | 0.0   | 4.0   | 0.0   | 1.0   | 0.0  |
| 21UR-74520 | 0.0   | 0.0   | 0.0   | 0.0   | 0.0   | 0.0  |
| 21UR-74530 | 0.0   | 0.0   | 1.0   | 0.0   | 0.0   | 0.0  |
| 21UR-74540 | 0.0   | 0.0   | 0.0   | 0.0   | 0.0   | 0.0  |
| 21UR-74550 | 7.0   | 2.0   | 4.0   | 0.0   | 5.5   | 0.0  |
| 21UR-74560 | 0.0   | 0.0   | 0.0   | 0.0   | 0.0   | 0.0  |
| 21UR-74570 | 15.0  | 9.0   | 14.0  | 10.0  | 0.0   | 3.0  |
| 21UR-74580 | 0.0   | 0.0   | 0.0   | 0.0   | 0.0   | 0.0  |
| 21UR-74590 | 0.0   | 0.0   | 0.0   | 0.0   | 0.0   | 0.0  |
| 21UR-7460  | 0.0   | 0.0   | 1.0   | 0.0   | 0.0   | 0.0  |
| 21UR-74610 | 8.0   | 2.0   | 3.0   | 0.0   | 8.0   | 0.0  |
| 21UR-74620 | 1.0   | 0.0   | 0.0   | 0.0   | 1.0   | 0.0  |
| 21UR-74630 | 1.0   | 0.0   | 2.0   | 0.0   | 1.0   | 0.0  |
| 21UR-74640 | 10.0  | 3.0   | 1.0   | 0.0   | 0.0   | 0.0  |
| 21UR-74650 | 0.0   | 0.0   | 0.0   | 0.0   | 0.0   | 0.0  |
| 21UR-74660 | 1.0   | 5.0   | 1.0   | 0.0   | 0.0   | 0.0  |
| 21UR-74670 | 0.0   | 0.0   | 0.0   | 0.0   | 0.0   | 0.0  |
| 21UR-74680 | 0.0   | 0.0   | 0.0   | 0.0   | 0.0   | 0.0  |
| 21UR-74690 | 11.0  | 4.0   | 21.5  | 1.0   | 0.0   | 0.0  |
| 21UR-7470  | 426.0 | 90.0  | 332.0 | 161.0 | 65.0  | 12.0 |
| 21UR-74700 | 0.0   | 0.0   | 0.0   | 0.0   | 0.0   | 0.0  |
| 21UR-74710 | 0.0   | 0.0   | 1.0   | 0.0   | 0.0   | 0.0  |
| 21UR-74720 | 0.0   | 0.0   | 0.0   | 1.0   | 1.0   | 0.0  |
| 21UR-74730 | 0.0   | 1.0   | 0.0   | 0.0   | 0.0   | 0.0  |
| 21UR-74740 | 14.0  | 8.0   | 9.0   | 3.0   | 3.0   | 1.0  |
| 21UR-74750 | 4.0   | 0.0   | 2.0   | 0.0   | 1.0   | 0.0  |
| 21UR-74760 | 0.0   | 0.0   | 0.0   | 0.0   | 0.0   | 0.0  |
| 21UR-74770 | 0.0   | 0.0   | 1.0   | 0.0   | 0.0   | 0.0  |
| 21UR-74780 | 4.0   | 0.0   | 4.0   | 0.0   | 1.0   | 0.0  |
| 21UR-74790 | 0.0   | 1.0   | 0.0   | 0.0   | 0.0   | 0.0  |
| 21UR-7480  | 0.0   | 0.0   | 0.0   | 0.0   | 0.0   | 0.0  |
| 21UR-74800 | 0.0   | 0.0   | 0.0   | 0.0   | 0.0   | 0.0  |
| 21UR-74810 | 4.0   | 2.0   | 3.0   | 2.0   | 12.0  | 0.0  |
| 21UR-74820 | 312.0 | 21.0  | 246.5 | 137.0 | 170.0 | 2.0  |
| 21UR-74830 | 1.0   | 2.3   | 0.0   | 0.0   | 1.0   | 0.0  |
| 21UR-74840 | 1.0   | 0.0   | 0.0   | 0.0   | 1.0   | 0.0  |
| 21UR-74850 | 0.0   | 0.0   | 1.0   | 0.0   | 1.0   | 0.0  |
| 21UR-74860 | 13.0  | 0.0   | 18.0  | 1.0   | 2.0   | 1.0  |
| 21UR-74870 | 30.0  | 14.0  | 11.0  | 6.0   | 9.5   | 0.0  |
| 21UR-74880 | 0.0   | 0.0   | 1.0   | 0.0   | 0.0   | 0.0  |
| 21UR-74890 | 0.0   | 0.0   | 0.0   | 0.0   | 2.0   | 0.0  |
| 21UR-7490  | 862.0 | 151.0 | 633.0 | 482.0 | 652.4 | 18.0 |
| 21UR-74900 | 0.0   | 0.0   | 0.0   | 0.0   | 0.0   | 0.0  |
| 21UR-74910 | 0.0   | 1.0   | 1.0   | 0.0   | 0.0   | 0.0  |
| 21UR-74920 | 0.0   | 0.0   | 1.0   | 0.0   | 0.0   | 0.0  |
| 21UR-74930 | 0.0   | 1.0   | 4.0   | 0.0   | 0.0   | 4.0  |
| 21UR-74940 | 0.0   | 1.0   | 0.0   | 0.0   | 0.0   | 0.0  |
| 21UR-74950 | 46.0  | 1.0   | 31.0  | 8.0   | 0.0   | 0.0  |
| 21UR-74960 | 48.0  | 11.0  | 41.0  | 17.0  | 10.0  | 0.0  |
| 21UR-74970 | 10.0  | 4.0   | 2.0   | 4.0   | 6.0   | 1.0  |
| 21UR-74980 | 87.7  | 2.3   | 85.5  | 20.0  | 2.0   | 0.0  |

|            |       |       |       |       |       |      |
|------------|-------|-------|-------|-------|-------|------|
| 21UR-74990 | 7.0   | 0.0   | 23.8  | 4.0   | 2.0   | 0.0  |
| 21UR-750   | 15.0  | 1.0   | 12.0  | 4.0   | 4.0   | 0.0  |
| 21UR-7500  | 0.0   | 0.0   | 0.0   | 0.0   | 0.0   | 0.0  |
| 21UR-75000 | 0.0   | 2.0   | 0.0   | 1.0   | 0.0   | 0.0  |
| 21UR-75010 | 4.0   | 1.0   | 3.0   | 0.0   | 2.0   | 1.0  |
| 21UR-75020 | 0.0   | 0.0   | 0.0   | 0.0   | 0.0   | 0.0  |
| 21UR-75030 | 0.0   | 0.0   | 0.0   | 0.0   | 0.0   | 0.0  |
| 21UR-75040 | 0.0   | 0.0   | 0.0   | 0.0   | 0.0   | 0.0  |
| 21UR-75050 | 0.1   | 0.0   | 0.0   | 0.0   | 0.0   | 0.0  |
| 21UR-75060 | 0.0   | 0.0   | 0.0   | 0.0   | 0.0   | 0.0  |
| 21UR-75070 | 0.0   | 0.0   | 0.0   | 0.0   | 0.0   | 0.0  |
| 21UR-75080 | 0.0   | 0.0   | 0.0   | 0.0   | 0.0   | 0.0  |
| 21UR-75090 | 1.0   | 0.0   | 0.0   | 0.0   | 0.0   | 1.0  |
| 21UR-7510  | 13.0  | 11.0  | 16.0  | 10.0  | 18.2  | 3.0  |
| 21UR-75100 | 2.0   | 0.0   | 0.0   | 0.0   | 0.0   | 1.0  |
| 21UR-75110 | 0.0   | 0.0   | 0.0   | 0.0   | 0.0   | 0.0  |
| 21UR-75120 | 18.5  | 23.0  | 43.0  | 7.0   | 21.0  | 1.0  |
| 21UR-75130 | 1.0   | 0.0   | 17.0  | 1.0   | 10.0  | 0.0  |
| 21UR-75140 | 1.0   | 0.0   | 0.0   | 0.0   | 4.0   | 0.0  |
| 21UR-75150 | 4.0   | 0.0   | 5.0   | 0.0   | 2.0   | 0.0  |
| 21UR-75160 | 5.0   | 0.0   | 6.0   | 0.0   | 0.0   | 0.0  |
| 21UR-75170 | 0.0   | 0.0   | 1.0   | 0.0   | 0.0   | 0.0  |
| 21UR-75180 | 1.0   | 0.2   | 1.0   | 0.0   | 1.0   | 0.0  |
| 21UR-75190 | 10.0  | 1.0   | 8.0   | 7.0   | 6.0   | 0.0  |
| 21UR-7520  | 0.0   | 0.0   | 0.0   | 0.0   | 0.0   | 0.0  |
| 21UR-75200 | 0.0   | 0.0   | 0.0   | 0.0   | 0.0   | 0.0  |
| 21UR-75210 | 1.0   | 0.0   | 1.0   | 0.0   | 0.0   | 0.0  |
| 21UR-75220 | 0.0   | 0.0   | 0.0   | 0.0   | 0.0   | 0.0  |
| 21UR-75230 | 10.0  | 0.0   | 2.0   | 1.0   | 0.0   | 0.0  |
| 21UR-75240 | 4.0   | 1.0   | 8.0   | 1.0   | 1.0   | 0.0  |
| 21UR-75250 | 0.0   | 1.0   | 0.0   | 0.0   | 0.0   | 0.0  |
| 21UR-75260 | 158.0 | 9.0   | 105.0 | 33.0  | 11.0  | 0.0  |
| 21UR-75270 | 26.0  | 2.0   | 23.0  | 11.0  | 1.0   | 0.0  |
| 21UR-75280 | 0.0   | 1.0   | 1.0   | 2.0   | 2.0   | 0.0  |
| 21UR-75290 | 2.0   | 3.0   | 3.0   | 0.0   | 0.0   | 0.0  |
| 21UR-7530  | 4.0   | 0.0   | 0.0   | 0.0   | 0.0   | 0.0  |
| 21UR-75300 | 1.0   | 1.0   | 0.0   | 1.0   | 4.0   | 0.0  |
| 21UR-75310 | 1.0   | 7.0   | 5.0   | 0.0   | 13.0  | 0.0  |
| 21UR-75320 | 2.5   | 0.0   | 1.0   | 0.0   | 0.0   | 0.0  |
| 21UR-75330 | 0.0   | 0.0   | 0.0   | 0.0   | 2.0   | 0.0  |
| 21UR-75340 | 124.0 | 33.0  | 89.0  | 68.0  | 106.3 | 4.0  |
| 21UR-75350 | 0.0   | 0.0   | 0.0   | 0.0   | 0.0   | 0.0  |
| 21UR-75360 | 0.0   | 0.0   | 0.0   | 0.0   | 0.0   | 0.0  |
| 21UR-75370 | 1.0   | 0.0   | 0.0   | 0.0   | 0.0   | 0.0  |
| 21UR-75380 | 340.7 | 176.0 | 269.0 | 198.0 | 233.0 | 26.0 |
| 21UR-75390 | 0.0   | 0.0   | 0.0   | 0.0   | 0.0   | 0.0  |
| 21UR-7540  | 1.0   | 1.0   | 2.0   | 0.0   | 1.0   | 0.0  |
| 21UR-75400 | 1.0   | 0.0   | 1.0   | 0.0   | 6.0   | 0.0  |
| 21UR-75410 | 0.0   | 0.0   | 0.0   | 0.0   | 0.0   | 0.0  |
| 21UR-75420 | 0.0   | 0.0   | 0.0   | 0.0   | 0.0   | 0.0  |
| 21UR-75430 | 1.0   | 1.0   | 0.0   | 1.0   | 0.0   | 0.0  |

|            |      |      |      |      |      |     |
|------------|------|------|------|------|------|-----|
| 21UR-75440 | 1.0  | 0.0  | 1.0  | 2.0  | 0.0  | 1.0 |
| 21UR-75450 | 16.0 | 4.0  | 9.0  | 4.0  | 0.0  | 1.0 |
| 21UR-75460 | 0.0  | 1.0  | 1.0  | 0.0  | 0.0  | 0.0 |
| 21UR-75470 | 17.7 | 4.0  | 19.0 | 10.0 | 8.0  | 0.0 |
| 21UR-75480 | 0.0  | 0.0  | 0.0  | 0.0  | 0.0  | 0.0 |
| 21UR-75490 | 0.0  | 0.0  | 0.0  | 0.0  | 0.0  | 0.0 |
| 21UR-7550  | 0.0  | 0.0  | 0.0  | 0.0  | 0.0  | 0.0 |
| 21UR-75500 | 1.0  | 1.0  | 2.0  | 0.0  | 0.0  | 0.0 |
| 21UR-75510 | 3.0  | 8.0  | 5.0  | 1.0  | 15.0 | 6.0 |
| 21UR-75520 | 0.0  | 0.0  | 0.0  | 0.0  | 0.0  | 0.0 |
| 21UR-75530 | 4.0  | 2.0  | 4.0  | 0.0  | 0.0  | 0.0 |
| 21UR-75540 | 9.0  | 1.0  | 10.0 | 0.0  | 8.0  | 0.0 |
| 21UR-75550 | 0.0  | 0.0  | 0.0  | 0.0  | 1.0  | 0.0 |
| 21UR-75560 | 0.0  | 0.0  | 0.0  | 0.0  | 0.0  | 0.0 |
| 21UR-75570 | 4.0  | 0.0  | 0.0  | 0.0  | 0.0  | 0.0 |
| 21UR-75580 | 1.0  | 0.0  | 0.0  | 0.0  | 1.0  | 0.0 |
| 21UR-75590 | 0.0  | 0.0  | 0.0  | 0.0  | 0.0  | 0.0 |
| 21UR-7560  | 1.0  | 6.0  | 4.0  | 6.0  | 12.0 | 1.0 |
| 21UR-75600 | 0.0  | 1.0  | 0.0  | 0.0  | 0.0  | 0.0 |
| 21UR-75610 | 0.0  | 0.0  | 0.0  | 0.0  | 0.0  | 0.0 |
| 21UR-75620 | 0.0  | 0.0  | 0.0  | 0.0  | 0.0  | 0.0 |
| 21UR-75630 | 0.0  | 0.1  | 0.0  | 0.0  | 0.0  | 0.0 |
| 21UR-75640 | 0.0  | 1.0  | 0.0  | 0.0  | 0.0  | 0.0 |
| 21UR-75650 | 0.0  | 0.0  | 0.0  | 0.0  | 0.0  | 0.0 |
| 21UR-75660 | 10.0 | 0.0  | 9.0  | 0.0  | 0.0  | 0.0 |
| 21UR-75670 | 1.0  | 0.0  | 0.0  | 0.0  | 0.0  | 0.0 |
| 21UR-75680 | 0.0  | 0.0  | 0.0  | 0.0  | 6.0  | 0.0 |
| 21UR-75690 | 62.0 | 4.0  | 53.0 | 6.0  | 8.0  | 3.0 |
| 21UR-7570  | 11.0 | 21.0 | 3.0  | 8.0  | 59.0 | 5.0 |
| 21UR-75700 | 0.0  | 0.0  | 0.0  | 0.0  | 0.0  | 0.0 |
| 21UR-75710 | 4.0  | 0.5  | 0.0  | 0.0  | 0.0  | 0.0 |
| 21UR-75720 | 1.0  | 4.0  | 0.0  | 0.0  | 1.0  | 0.0 |
| 21UR-75730 | 0.0  | 0.0  | 0.0  | 0.0  | 0.0  | 0.0 |
| 21UR-75750 | 0.0  | 0.0  | 4.0  | 0.0  | 1.0  | 1.0 |
| 21UR-75760 | 0.0  | 0.0  | 1.0  | 1.0  | 1.0  | 0.0 |
| 21UR-75790 | 6.0  | 5.0  | 7.0  | 1.0  | 13.3 | 0.0 |
| 21UR-7580  | 0.0  | 0.0  | 0.0  | 0.0  | 1.0  | 0.0 |
| 21UR-75800 | 23.0 | 0.0  | 3.0  | 2.0  | 1.0  | 0.0 |
| 21UR-75810 | 0.0  | 0.0  | 0.0  | 0.0  | 0.0  | 0.0 |
| 21UR-75820 | 0.0  | 0.0  | 0.0  | 0.0  | 0.0  | 0.0 |
| 21UR-75830 | 0.0  | 0.0  | 0.0  | 0.0  | 0.0  | 0.0 |
| 21UR-75840 | 97.5 | 18.0 | 83.5 | 8.0  | 18.0 | 3.0 |
| 21UR-75850 | 0.0  | 0.0  | 0.0  | 0.0  | 0.0  | 0.0 |
| 21UR-75860 | 0.0  | 0.0  | 0.0  | 0.0  | 0.0  | 0.0 |
| 21UR-75870 | 13.0 | 0.0  | 4.0  | 0.0  | 1.0  | 0.0 |
| 21UR-75880 | 0.0  | 0.0  | 0.0  | 0.0  | 0.0  | 0.0 |
| 21UR-75890 | 0.0  | 0.0  | 0.0  | 1.0  | 0.0  | 0.0 |
| 21UR-7590  | 4.0  | 1.0  | 4.0  | 0.0  | 1.0  | 0.0 |
| 21UR-75900 | 0.0  | 0.0  | 0.0  | 0.0  | 0.0  | 0.0 |
| 21UR-75910 | 2.0  | 0.0  | 0.0  | 1.0  | 0.0  | 0.0 |
| 21UR-75920 | 0.0  | 1.0  | 0.0  | 0.0  | 0.0  | 0.0 |

|            |        |       |       |       |       |      |
|------------|--------|-------|-------|-------|-------|------|
| 21UR-75930 | 2.0    | 3.0   | 4.0   | 1.0   | 1.0   | 0.0  |
| 21UR-75940 | 5.0    | 0.0   | 0.0   | 1.0   | 0.0   | 0.0  |
| 21UR-75950 | 0.0    | 0.0   | 0.0   | 0.0   | 0.0   | 0.0  |
| 21UR-75960 | 0.0    | 0.0   | 0.0   | 0.0   | 0.0   | 1.0  |
| 21UR-75970 | 0.0    | 0.0   | 0.0   | 0.0   | 0.0   | 0.0  |
| 21UR-75980 | 0.0    | 0.0   | 0.0   | 0.0   | 0.0   | 0.0  |
| 21UR-75990 | 437.0  | 100.0 | 270.0 | 247.0 | 96.0  | 7.0  |
| 21UR-760   | 8.0    | 7.0   | 8.0   | 1.0   | 9.0   | 1.0  |
| 21UR-7600  | 15.0   | 6.5   | 18.0  | 3.0   | 12.0  | 0.0  |
| 21UR-76000 | 0.0    | 0.0   | 0.0   | 0.0   | 0.0   | 0.0  |
| 21UR-76010 | 0.0    | 2.0   | 0.0   | 0.0   | 0.0   | 0.0  |
| 21UR-76020 | 180.0  | 238.5 | 96.0  | 87.0  | 118.5 | 18.0 |
| 21UR-76030 | 1.0    | 0.0   | 0.0   | 0.0   | 4.0   | 0.0  |
| 21UR-76040 | 14.0   | 5.0   | 32.0  | 12.0  | 28.5  | 1.0  |
| 21UR-76050 | 4.0    | 4.0   | 10.0  | 6.0   | 10.7  | 4.0  |
| 21UR-76060 | 6.0    | 0.0   | 1.0   | 0.0   | 7.0   | 0.0  |
| 21UR-76070 | 5.0    | 0.0   | 6.0   | 0.0   | 0.0   | 0.0  |
| 21UR-76080 | 1069.5 | 79.2  | 907.0 | 449.0 | 52.0  | 8.0  |
| 21UR-76090 | 0.0    | 0.0   | 0.0   | 0.0   | 0.0   | 0.0  |
| 21UR-7610  | 0.0    | 1.0   | 1.0   | 0.0   | 1.0   | 0.0  |
| 21UR-76100 | 54.0   | 25.0  | 34.0  | 29.0  | 31.0  | 2.0  |
| 21UR-76110 | 0.0    | 0.0   | 2.0   | 0.0   | 0.0   | 0.0  |
| 21UR-76120 | 0.0    | 0.0   | 0.0   | 0.0   | 7.0   | 0.0  |
| 21UR-76140 | 0.0    | 2.0   | 0.0   | 0.0   | 0.0   | 0.0  |
| 21UR-76150 | 4.0    | 0.0   | 11.0  | 1.0   | 1.0   | 0.0  |
| 21UR-76160 | 0.0    | 0.0   | 0.0   | 0.0   | 0.0   | 0.0  |
| 21UR-76170 | 0.0    | 0.0   | 0.0   | 0.0   | 3.0   | 0.0  |
| 21UR-76180 | 25.5   | 1.0   | 14.3  | 2.0   | 2.0   | 0.0  |
| 21UR-76190 | 1.0    | 1.7   | 2.0   | 0.0   | 2.0   | 1.0  |
| 21UR-7620  | 0.0    | 0.0   | 4.0   | 1.0   | 0.0   | 0.0  |
| 21UR-76200 | 0.0    | 0.0   | 0.0   | 0.0   | 0.0   | 0.0  |
| 21UR-76210 | 0.0    | 0.0   | 0.0   | 0.0   | 0.0   | 0.0  |
| 21UR-76220 | 0.0    | 0.0   | 0.0   | 0.0   | 0.0   | 0.0  |
| 21UR-76230 | 1.0    | 5.0   | 3.0   | 0.0   | 8.0   | 0.0  |
| 21UR-76240 | 0.0    | 0.0   | 0.0   | 1.0   | 0.0   | 0.0  |
| 21UR-76250 | 0.0    | 0.0   | 0.0   | 0.0   | 0.0   | 0.0  |
| 21UR-76260 | 1.0    | 0.0   | 0.0   | 0.0   | 0.0   | 0.0  |
| 21UR-76270 | 4.0    | 4.0   | 2.0   | 0.0   | 1.0   | 1.0  |
| 21UR-76280 | 48.0   | 23.0  | 43.0  | 10.0  | 17.0  | 7.0  |
| 21UR-76290 | 0.0    | 0.0   | 0.0   | 0.0   | 0.0   | 0.0  |
| 21UR-7630  | 0.0    | 0.3   | 0.0   | 0.0   | 0.0   | 0.0  |
| 21UR-76300 | 10.0   | 4.0   | 2.0   | 0.0   | 0.0   | 1.0  |
| 21UR-76310 | 0.0    | 3.0   | 0.0   | 0.0   | 2.0   | 0.0  |
| 21UR-76320 | 0.0    | 0.0   | 0.0   | 0.0   | 0.0   | 0.0  |
| 21UR-76330 | 0.0    | 0.0   | 0.0   | 0.0   | 0.0   | 0.0  |
| 21UR-76340 | 0.0    | 0.0   | 0.0   | 0.0   | 4.0   | 1.0  |
| 21UR-76350 | 0.0    | 1.0   | 1.0   | 0.0   | 0.0   | 0.0  |
| 21UR-76360 | 1.0    | 0.0   | 1.0   | 0.0   | 0.0   | 0.0  |
| 21UR-76370 | 0.0    | 0.0   | 1.0   | 0.0   | 0.0   | 0.0  |
| 21UR-76380 | 0.0    | 0.0   | 0.0   | 0.0   | 0.0   | 0.0  |
| 21UR-76390 | 1.0    | 0.0   | 0.0   | 0.0   | 1.0   | 1.0  |

|            |       |       |       |       |      |      |
|------------|-------|-------|-------|-------|------|------|
| 21UR-7640  | 0.0   | 0.0   | 0.0   | 0.0   | 0.0  | 0.0  |
| 21UR-76400 | 15.0  | 27.0  | 16.0  | 16.0  | 50.0 | 3.0  |
| 21UR-76410 | 0.0   | 0.0   | 1.0   | 0.0   | 1.0  | 0.0  |
| 21UR-76420 | 0.0   | 0.0   | 0.0   | 0.0   | 0.0  | 0.0  |
| 21UR-76430 | 1.0   | 1.0   | 1.0   | 0.0   | 0.0  | 0.0  |
| 21UR-76440 | 1.0   | 1.0   | 0.0   | 0.0   | 4.0  | 0.0  |
| 21UR-76450 | 326.0 | 18.0  | 317.0 | 59.0  | 10.0 | 4.0  |
| 21UR-76460 | 9.0   | 2.0   | 14.0  | 4.0   | 6.0  | 1.0  |
| 21UR-76470 | 0.0   | 0.0   | 0.0   | 0.0   | 1.0  | 0.0  |
| 21UR-76480 | 0.0   | 0.0   | 0.0   | 1.0   | 0.0  | 0.0  |
| 21UR-76490 | 1.0   | 0.0   | 0.0   | 0.0   | 0.0  | 0.0  |
| 21UR-7650  | 14.0  | 3.0   | 24.0  | 4.0   | 8.0  | 0.0  |
| 21UR-76500 | 3.0   | 0.0   | 3.0   | 0.0   | 1.0  | 0.0  |
| 21UR-76510 | 0.0   | 0.0   | 0.0   | 0.0   | 0.0  | 0.0  |
| 21UR-76520 | 4.0   | 0.0   | 2.0   | 0.0   | 1.0  | 0.0  |
| 21UR-76530 | 0.0   | 0.0   | 0.0   | 0.0   | 0.0  | 0.0  |
| 21UR-76540 | 775.0 | 147.0 | 451.0 | 210.0 | 92.0 | 35.0 |
| 21UR-76550 | 0.0   | 0.0   | 0.0   | 0.0   | 0.0  | 0.0  |
| 21UR-76560 | 1.0   | 0.0   | 0.0   | 0.0   | 0.0  | 0.0  |
| 21UR-76570 | 0.0   | 0.0   | 0.0   | 0.0   | 0.0  | 0.0  |
| 21UR-76580 | 0.0   | 0.0   | 0.0   | 0.0   | 0.0  | 0.0  |
| 21UR-76590 | 107.0 | 16.0  | 80.5  | 59.0  | 50.5 | 4.0  |
| 21UR-76600 | 0.0   | 0.0   | 0.0   | 0.0   | 0.0  | 0.0  |
| 21UR-76610 | 0.0   | 0.0   | 0.0   | 0.0   | 0.0  | 0.0  |
| 21UR-76620 | 0.0   | 0.0   | 0.0   | 0.0   | 0.0  | 0.0  |
| 21UR-76630 | 0.0   | 0.0   | 0.0   | 0.0   | 0.0  | 0.0  |
| 21UR-76640 | 0.0   | 0.0   | 0.0   | 0.0   | 0.0  | 0.0  |
| 21UR-76650 | 0.0   | 0.0   | 1.0   | 0.0   | 1.0  | 0.0  |
| 21UR-76660 | 2.0   | 1.0   | 1.0   | 1.0   | 6.0  | 0.0  |
| 21UR-76670 | 0.0   | 0.0   | 0.0   | 4.0   | 0.0  | 0.0  |
| 21UR-76680 | 0.0   | 0.0   | 2.0   | 1.0   | 0.0  | 0.0  |
| 21UR-76690 | 0.0   | 0.0   | 0.0   | 0.0   | 0.0  | 0.0  |
| 21UR-7670  | 0.0   | 0.0   | 0.0   | 0.0   | 0.0  | 0.0  |
| 21UR-76700 | 0.0   | 1.0   | 0.0   | 4.0   | 0.0  | 0.0  |
| 21UR-76710 | 0.0   | 0.0   | 5.0   | 2.0   | 2.0  | 0.0  |
| 21UR-76720 | 4.0   | 0.0   | 1.0   | 0.0   | 0.0  | 0.0  |
| 21UR-76730 | 0.0   | 0.0   | 0.0   | 0.0   | 0.0  | 0.0  |
| 21UR-76740 | 0.0   | 0.0   | 0.0   | 0.0   | 0.0  | 0.0  |
| 21UR-76750 | 0.0   | 0.0   | 0.0   | 0.0   | 0.0  | 1.0  |
| 21UR-76760 | 6.0   | 0.0   | 8.0   | 2.0   | 1.0  | 0.0  |
| 21UR-76770 | 0.0   | 0.0   | 0.0   | 0.0   | 0.0  | 0.0  |
| 21UR-76790 | 8.0   | 1.0   | 12.0  | 0.0   | 1.0  | 1.0  |
| 21UR-7680  | 44.0  | 61.0  | 24.0  | 15.0  | 68.0 | 11.0 |
| 21UR-76800 | 0.0   | 0.0   | 0.0   | 0.0   | 0.0  | 0.0  |
| 21UR-76810 | 0.0   | 0.0   | 0.0   | 0.0   | 1.0  | 0.0  |
| 21UR-76820 | 0.0   | 2.0   | 1.0   | 0.0   | 1.0  | 0.0  |
| 21UR-76830 | 5.0   | 2.0   | 10.0  | 3.0   | 1.0  | 0.0  |
| 21UR-76840 | 0.0   | 0.0   | 0.0   | 0.0   | 0.0  | 0.0  |
| 21UR-76850 | 1.0   | 1.0   | 2.0   | 0.0   | 1.0  | 0.0  |
| 21UR-76860 | 0.0   | 0.0   | 1.0   | 0.0   | 0.0  | 0.0  |
| 21UR-76870 | 0.0   | 0.0   | 1.0   | 0.0   | 0.0  | 0.0  |



|            |       |      |       |       |      |     |
|------------|-------|------|-------|-------|------|-----|
| 21UR-76880 | 0.0   | 0.0  | 0.0   | 0.0   | 0.0  | 1.0 |
| 21UR-76890 | 0.0   | 2.0  | 0.0   | 0.0   | 4.0  | 0.0 |
| 21UR-7690  | 1.0   | 1.0  | 1.0   | 1.0   | 0.0  | 0.0 |
| 21UR-76900 | 0.0   | 0.0  | 2.0   | 1.0   | 0.0  | 0.0 |
| 21UR-76910 | 0.0   | 0.0  | 0.0   | 0.0   | 0.0  | 0.0 |
| 21UR-76920 | 0.0   | 0.0  | 0.0   | 0.0   | 0.0  | 0.0 |
| 21UR-76930 | 0.0   | 0.0  | 0.0   | 0.0   | 0.0  | 0.0 |
| 21UR-76940 | 2.0   | 0.0  | 1.0   | 1.0   | 0.0  | 0.0 |
| 21UR-76950 | 0.0   | 0.0  | 0.0   | 0.0   | 0.0  | 0.0 |
| 21UR-76960 | 6.0   | 0.0  | 4.0   | 0.0   | 0.0  | 0.0 |
| 21UR-76970 | 0.0   | 2.0  | 1.0   | 0.0   | 0.0  | 0.0 |
| 21UR-76980 | 403.0 | 26.0 | 312.0 | 244.3 | 52.0 | 0.0 |
| 21UR-76990 | 1.0   | 0.0  | 0.0   | 0.0   | 0.0  | 0.0 |
| 21UR-770   | 0.0   | 0.0  | 0.0   | 0.0   | 0.0  | 0.0 |
| 21UR-7700  | 20.0  | 1.0  | 17.0  | 0.0   | 1.0  | 0.0 |
| 21UR-77000 | 0.0   | 0.0  | 0.0   | 0.0   | 1.0  | 0.0 |
| 21UR-77010 | 0.0   | 0.0  | 0.0   | 0.0   | 0.0  | 0.0 |
| 21UR-77020 | 76.0  | 14.0 | 76.0  | 23.0  | 21.0 | 5.0 |
| 21UR-77030 | 0.0   | 2.0  | 0.0   | 0.0   | 0.0  | 0.0 |
| 21UR-77040 | 0.0   | 0.0  | 0.0   | 0.0   | 0.0  | 0.0 |
| 21UR-77050 | 1.0   | 15.0 | 9.0   | 0.0   | 20.0 | 1.0 |
| 21UR-77060 | 0.0   | 0.0  | 0.0   | 0.0   | 0.0  | 0.0 |
| 21UR-77070 | 1.0   | 2.0  | 1.0   | 0.0   | 0.0  | 0.0 |
| 21UR-77080 | 0.0   | 0.0  | 0.0   | 0.0   | 0.0  | 0.0 |
| 21UR-77090 | 0.0   | 0.0  | 0.0   | 0.0   | 0.0  | 0.0 |
| 21UR-7710  | 16.0  | 3.0  | 12.0  | 8.0   | 0.0  | 0.0 |
| 21UR-77100 | 33.0  | 0.0  | 37.0  | 33.0  | 4.0  | 0.0 |
| 21UR-77110 | 0.0   | 0.0  | 0.0   | 0.0   | 0.0  | 0.0 |
| 21UR-77120 | 0.0   | 0.0  | 0.0   | 0.0   | 0.0  | 0.0 |
| 21UR-77130 | 0.0   | 1.0  | 0.0   | 0.0   | 0.0  | 0.0 |
| 21UR-77140 | 5.0   | 1.0  | 10.0  | 1.0   | 2.0  | 0.0 |
| 21UR-77150 | 0.0   | 0.0  | 0.0   | 0.0   | 0.0  | 0.0 |
| 21UR-77160 | 0.0   | 0.0  | 1.0   | 0.0   | 0.0  | 0.0 |
| 21UR-77170 | 0.0   | 0.0  | 0.0   | 0.0   | 0.0  | 0.0 |
| 21UR-77180 | 0.0   | 0.0  | 0.0   | 0.0   | 0.0  | 0.0 |
| 21UR-77190 | 1.0   | 0.0  | 0.0   | 0.0   | 1.0  | 0.0 |
| 21UR-7720  | 0.0   | 0.0  | 0.0   | 0.0   | 0.0  | 0.0 |
| 21UR-77200 | 0.0   | 0.0  | 0.0   | 0.0   | 0.0  | 0.0 |
| 21UR-77210 | 19.5  | 15.0 | 15.0  | 5.0   | 8.0  | 0.0 |
| 21UR-77220 | 0.0   | 0.0  | 0.0   | 0.0   | 1.0  | 1.0 |
| 21UR-77230 | 0.0   | 0.0  | 0.0   | 0.0   | 0.0  | 0.0 |
| 21UR-77240 | 13.0  | 0.0  | 10.0  | 2.0   | 1.0  | 0.0 |
| 21UR-77250 | 0.0   | 0.0  | 0.0   | 0.0   | 0.0  | 0.0 |
| 21UR-77260 | 0.0   | 0.0  | 0.0   | 0.0   | 0.0  | 0.0 |
| 21UR-77270 | 0.0   | 0.0  | 0.0   | 0.0   | 1.0  | 0.0 |
| 21UR-77280 | 11.0  | 2.0  | 4.0   | 19.0  | 9.0  | 0.0 |
| 21UR-77290 | 0.0   | 0.0  | 0.0   | 0.0   | 0.0  | 0.0 |
| 21UR-7730  | 12.0  | 0.0  | 6.0   | 0.0   | 1.0  | 0.0 |
| 21UR-77300 | 4.0   | 0.0  | 0.0   | 0.0   | 0.0  | 0.0 |
| 21UR-77310 | 0.0   | 0.0  | 0.0   | 0.0   | 0.0  | 0.0 |
| 21UR-77320 | 0.0   | 0.0  | 0.0   | 0.0   | 0.0  | 0.0 |

|            |       |      |       |       |      |     |
|------------|-------|------|-------|-------|------|-----|
| 21UR-77330 | 1.0   | 0.0  | 0.0   | 0.0   | 0.0  | 0.0 |
| 21UR-77340 | 1.0   | 0.0  | 0.0   | 0.0   | 0.0  | 0.0 |
| 21UR-77350 | 2.0   | 1.0  | 1.0   | 0.0   | 0.0  | 0.0 |
| 21UR-77360 | 0.0   | 1.0  | 1.0   | 2.0   | 2.0  | 0.0 |
| 21UR-77370 | 17.0  | 7.0  | 6.0   | 1.0   | 9.0  | 3.0 |
| 21UR-77380 | 0.0   | 0.0  | 0.0   | 0.0   | 0.0  | 0.0 |
| 21UR-77390 | 8.0   | 6.0  | 12.0  | 1.0   | 9.0  | 0.0 |
| 21UR-7740  | 0.0   | 0.0  | 0.0   | 0.0   | 1.0  | 0.0 |
| 21UR-77400 | 1.0   | 1.0  | 0.0   | 0.0   | 0.0  | 0.0 |
| 21UR-77410 | 0.0   | 0.0  | 0.0   | 0.0   | 0.0  | 0.0 |
| 21UR-77420 | 0.0   | 0.0  | 0.0   | 0.0   | 0.0  | 1.0 |
| 21UR-77430 | 15.0  | 0.0  | 10.0  | 6.0   | 1.0  | 1.0 |
| 21UR-77440 | 0.0   | 0.0  | 0.0   | 0.0   | 0.0  | 0.0 |
| 21UR-77450 | 0.0   | 6.0  | 0.0   | 0.0   | 4.0  | 0.0 |
| 21UR-77460 | 1.0   | 0.0  | 4.0   | 0.0   | 0.0  | 0.0 |
| 21UR-77470 | 2.0   | 0.0  | 0.0   | 0.0   | 0.0  | 0.0 |
| 21UR-77480 | 0.0   | 0.0  | 0.0   | 0.0   | 2.0  | 0.0 |
| 21UR-77490 | 0.0   | 0.0  | 1.0   | 0.0   | 0.0  | 0.0 |
| 21UR-7750  | 1.0   | 0.0  | 1.0   | 0.0   | 0.0  | 0.0 |
| 21UR-77500 | 10.0  | 2.0  | 1.0   | 1.0   | 0.0  | 0.0 |
| 21UR-77510 | 13.0  | 4.0  | 11.0  | 0.0   | 1.0  | 1.0 |
| 21UR-77520 | 0.0   | 1.1  | 0.0   | 0.0   | 0.0  | 0.0 |
| 21UR-77530 | 0.0   | 0.0  | 0.0   | 0.0   | 0.0  | 0.0 |
| 21UR-77540 | 0.0   | 0.0  | 0.0   | 0.0   | 0.0  | 0.0 |
| 21UR-77550 | 0.0   | 0.0  | 0.0   | 0.0   | 0.0  | 0.0 |
| 21UR-77560 | 0.0   | 0.0  | 0.0   | 0.0   | 0.0  | 0.0 |
| 21UR-77570 | 0.0   | 0.0  | 0.0   | 0.0   | 0.0  | 0.0 |
| 21UR-77580 | 8.0   | 6.0  | 10.0  | 4.0   | 1.0  | 1.0 |
| 21UR-77590 | 349.0 | 47.0 | 315.0 | 101.0 | 35.0 | 1.0 |
| 21UR-7760  | 14.0  | 0.0  | 12.0  | 2.0   | 1.0  | 0.0 |
| 21UR-77600 | 1.0   | 0.0  | 0.0   | 0.0   | 1.0  | 1.0 |
| 21UR-77610 | 83.7  | 4.0  | 79.0  | 18.0  | 9.0  | 0.0 |
| 21UR-77620 | 0.0   | 0.0  | 0.0   | 0.0   | 0.0  | 0.0 |
| 21UR-77630 | 0.0   | 1.0  | 0.0   | 0.0   | 1.0  | 0.0 |
| 21UR-77640 | 0.0   | 9.0  | 1.0   | 0.0   | 2.0  | 0.0 |
| 21UR-77650 | 0.0   | 0.0  | 0.0   | 0.0   | 0.0  | 0.0 |
| 21UR-77660 | 1.0   | 0.0  | 1.0   | 1.0   | 0.0  | 0.0 |
| 21UR-77670 | 0.0   | 0.0  | 1.0   | 1.0   | 0.0  | 0.0 |
| 21UR-77680 | 0.0   | 2.0  | 3.0   | 0.0   | 5.0  | 1.0 |
| 21UR-77690 | 1.0   | 0.0  | 0.0   | 0.0   | 0.0  | 0.0 |
| 21UR-7770  | 12.0  | 0.0  | 6.0   | 6.0   | 8.0  | 0.0 |
| 21UR-77700 | 4.0   | 2.0  | 6.0   | 0.0   | 1.0  | 4.0 |
| 21UR-77710 | 0.0   | 0.0  | 0.0   | 1.0   | 0.0  | 0.0 |
| 21UR-77720 | 32.0  | 10.0 | 20.0  | 3.0   | 11.0 | 1.0 |
| 21UR-77730 | 0.0   | 1.0  | 0.0   | 0.0   | 1.0  | 1.0 |
| 21UR-77740 | 0.0   | 0.0  | 0.0   | 1.0   | 0.0  | 0.0 |
| 21UR-77750 | 1.0   | 0.0  | 1.0   | 0.0   | 0.0  | 0.0 |
| 21UR-77770 | 1.0   | 0.0  | 0.0   | 0.0   | 1.0  | 0.0 |
| 21UR-77780 | 15.0  | 0.0  | 4.0   | 4.0   | 0.0  | 0.0 |
| 21UR-77790 | 0.0   | 0.0  | 0.0   | 0.0   | 0.0  | 0.0 |
| 21UR-7780  | 0.0   | 0.0  | 0.0   | 0.0   | 0.0  | 0.0 |

|            |      |     |      |      |      |     |
|------------|------|-----|------|------|------|-----|
| 21UR-77800 | 1.0  | 1.7 | 4.0  | 0.0  | 4.0  | 1.0 |
| 21UR-77820 | 0.0  | 0.0 | 0.0  | 0.0  | 0.0  | 0.0 |
| 21UR-77830 | 20.5 | 2.0 | 14.0 | 3.0  | 5.0  | 0.0 |
| 21UR-77840 | 0.0  | 0.0 | 0.0  | 0.0  | 0.0  | 0.0 |
| 21UR-77850 | 0.0  | 0.0 | 0.0  | 0.0  | 0.0  | 0.0 |
| 21UR-77860 | 7.0  | 1.0 | 4.0  | 3.0  | 2.0  | 1.0 |
| 21UR-77870 | 1.0  | 0.0 | 1.0  | 0.0  | 0.0  | 0.0 |
| 21UR-77880 | 0.0  | 0.0 | 0.0  | 0.0  | 0.0  | 0.0 |
| 21UR-77890 | 4.0  | 2.0 | 2.0  | 0.0  | 11.0 | 0.0 |
| 21UR-7790  | 1.0  | 0.0 | 0.0  | 0.0  | 0.0  | 0.0 |
| 21UR-77900 | 0.0  | 0.0 | 0.0  | 0.0  | 0.0  | 0.0 |
| 21UR-77910 | 2.0  | 0.0 | 3.0  | 0.0  | 0.0  | 0.0 |
| 21UR-77920 | 0.0  | 0.0 | 0.0  | 0.0  | 0.0  | 0.0 |
| 21UR-77930 | 0.0  | 0.0 | 1.0  | 1.0  | 4.0  | 0.0 |
| 21UR-77940 | 0.0  | 0.0 | 0.0  | 0.0  | 0.0  | 0.0 |
| 21UR-77950 | 1.0  | 1.0 | 4.0  | 1.0  | 1.0  | 1.0 |
| 21UR-77960 | 0.0  | 0.0 | 0.0  | 0.0  | 1.0  | 1.0 |
| 21UR-77970 | 0.0  | 0.0 | 0.0  | 0.0  | 0.0  | 0.0 |
| 21UR-77980 | 4.0  | 7.0 | 0.0  | 0.0  | 0.0  | 1.0 |
| 21UR-77990 | 0.0  | 0.0 | 1.0  | 1.0  | 0.0  | 0.0 |
| 21UR-780   | 93.0 | 0.0 | 46.0 | 9.0  | 0.3  | 1.0 |
| 21UR-7800  | 0.0  | 0.0 | 0.0  | 0.0  | 1.0  | 0.0 |
| 21UR-78000 | 1.0  | 4.0 | 0.0  | 0.0  | 0.0  | 1.0 |
| 21UR-78010 | 0.0  | 0.0 | 0.0  | 0.0  | 0.0  | 0.0 |
| 21UR-78020 | 15.0 | 1.0 | 15.0 | 10.0 | 0.0  | 0.0 |
| 21UR-78030 | 0.0  | 0.0 | 0.0  | 0.0  | 0.0  | 0.0 |
| 21UR-78040 | 0.0  | 0.0 | 0.0  | 0.0  | 0.0  | 0.0 |
| 21UR-78050 | 6.0  | 0.0 | 1.0  | 0.0  | 0.0  | 0.0 |
| 21UR-78060 | 0.0  | 0.0 | 1.0  | 0.0  | 0.0  | 0.0 |
| 21UR-78070 | 0.0  | 0.0 | 0.0  | 0.0  | 0.0  | 0.0 |
| 21UR-78080 | 0.0  | 0.0 | 0.0  | 0.0  | 1.0  | 0.0 |
| 21UR-78090 | 0.0  | 1.0 | 1.0  | 0.0  | 1.0  | 2.0 |
| 21UR-7810  | 1.0  | 0.0 | 0.0  | 1.0  | 4.0  | 0.0 |
| 21UR-78100 | 0.5  | 0.0 | 0.0  | 0.0  | 0.0  | 0.0 |
| 21UR-78110 | 2.0  | 4.0 | 7.0  | 6.0  | 5.0  | 0.0 |
| 21UR-78120 | 1.0  | 0.0 | 0.0  | 0.0  | 0.0  | 0.0 |
| 21UR-78130 | 0.0  | 0.0 | 0.0  | 0.0  | 0.0  | 0.0 |
| 21UR-78140 | 1.0  | 0.0 | 0.0  | 0.0  | 0.0  | 0.0 |
| 21UR-78150 | 7.0  | 1.0 | 4.0  | 9.0  | 4.0  | 0.0 |
| 21UR-78160 | 0.0  | 0.0 | 0.0  | 0.0  | 0.0  | 0.0 |
| 21UR-78170 | 0.0  | 0.0 | 0.0  | 0.0  | 0.0  | 0.0 |
| 21UR-78180 | 1.0  | 0.0 | 1.0  | 0.0  | 1.0  | 0.0 |
| 21UR-78190 | 0.0  | 0.0 | 1.0  | 0.0  | 0.0  | 0.0 |
| 21UR-7820  | 1.0  | 0.0 | 8.0  | 1.0  | 0.0  | 0.0 |
| 21UR-78200 | 0.0  | 0.0 | 0.0  | 0.0  | 1.0  | 0.0 |
| 21UR-78210 | 0.0  | 1.0 | 0.0  | 0.0  | 0.0  | 0.0 |
| 21UR-78220 | 1.0  | 0.0 | 0.0  | 0.0  | 0.0  | 0.0 |
| 21UR-78230 | 0.0  | 0.0 | 0.0  | 0.0  | 0.0  | 0.0 |
| 21UR-78240 | 1.0  | 0.0 | 4.0  | 0.0  | 0.0  | 0.0 |
| 21UR-78250 | 5.0  | 1.0 | 7.0  | 3.0  | 0.0  | 0.0 |
| 21UR-78260 | 0.0  | 1.0 | 0.0  | 0.0  | 0.0  | 0.0 |

|            |       |       |       |      |       |      |
|------------|-------|-------|-------|------|-------|------|
| 21UR-78270 | 0.0   | 0.0   | 0.0   | 0.0  | 0.0   | 0.0  |
| 21UR-78280 | 0.0   | 0.0   | 1.0   | 0.0  | 0.0   | 0.0  |
| 21UR-78290 | 83.5  | 172.7 | 103.6 | 28.0 | 107.3 | 22.5 |
| 21UR-7830  | 8.0   | 3.0   | 4.0   | 1.0  | 3.0   | 1.0  |
| 21UR-78300 | 0.0   | 0.0   | 0.0   | 0.0  | 0.0   | 0.0  |
| 21UR-78310 | 0.0   | 0.0   | 0.0   | 0.0  | 0.0   | 0.0  |
| 21UR-78320 | 0.0   | 0.0   | 1.0   | 0.0  | 1.0   | 0.0  |
| 21UR-78330 | 0.0   | 0.0   | 0.0   | 0.0  | 0.0   | 0.0  |
| 21UR-78340 | 0.0   | 0.0   | 0.0   | 0.0  | 0.0   | 0.0  |
| 21UR-78350 | 1.0   | 2.0   | 0.0   | 0.0  | 1.0   | 0.0  |
| 21UR-78360 | 0.0   | 0.0   | 1.0   | 0.0  | 0.0   | 0.0  |
| 21UR-78370 | 0.0   | 0.0   | 0.0   | 0.0  | 0.0   | 0.0  |
| 21UR-78380 | 253.0 | 164.7 | 249.0 | 85.0 | 170.0 | 16.0 |
| 21UR-78390 | 0.0   | 0.0   | 0.0   | 0.0  | 0.0   | 0.0  |
| 21UR-7840  | 1.0   | 0.0   | 1.0   | 0.0  | 1.0   | 1.0  |
| 21UR-78400 | 0.0   | 0.0   | 0.0   | 0.0  | 0.0   | 0.0  |
| 21UR-78410 | 0.0   | 0.0   | 0.0   | 0.0  | 0.0   | 0.0  |
| 21UR-78420 | 0.0   | 0.0   | 0.0   | 0.0  | 0.0   | 0.0  |
| 21UR-78430 | 1.0   | 0.0   | 0.0   | 0.0  | 0.0   | 0.0  |
| 21UR-78440 | 0.0   | 0.0   | 0.0   | 0.0  | 0.0   | 0.0  |
| 21UR-78450 | 0.0   | 1.0   | 1.0   | 0.0  | 9.0   | 0.0  |
| 21UR-78460 | 4.0   | 6.0   | 6.0   | 0.0  | 9.0   | 0.0  |
| 21UR-78470 | 4.0   | 1.0   | 0.0   | 0.0  | 4.0   | 0.1  |
| 21UR-78480 | 4.0   | 9.3   | 8.0   | 1.0  | 1.0   | 0.0  |
| 21UR-78490 | 0.0   | 0.0   | 0.0   | 0.0  | 0.0   | 0.0  |
| 21UR-7850  | 10.0  | 7.1   | 12.0  | 1.0  | 6.0   | 0.0  |
| 21UR-78500 | 0.0   | 0.0   | 0.0   | 0.0  | 0.0   | 0.0  |
| 21UR-78510 | 0.0   | 0.0   | 0.0   | 0.0  | 0.0   | 0.0  |
| 21UR-78520 | 0.0   | 0.0   | 0.0   | 0.0  | 0.0   | 0.0  |
| 21UR-78530 | 0.0   | 0.0   | 0.0   | 0.0  | 0.0   | 0.0  |
| 21UR-78540 | 0.0   | 0.0   | 0.0   | 0.0  | 0.0   | 0.0  |
| 21UR-78550 | 4.0   | 0.0   | 1.0   | 0.0  | 1.0   | 0.0  |
| 21UR-78560 | 0.0   | 1.0   | 0.0   | 0.0  | 0.0   | 0.0  |
| 21UR-78570 | 0.0   | 0.0   | 0.0   | 0.0  | 0.0   | 0.0  |
| 21UR-78580 | 0.0   | 0.0   | 0.0   | 0.0  | 0.0   | 0.0  |
| 21UR-78590 | 0.0   | 0.0   | 0.0   | 0.0  | 0.0   | 0.0  |
| 21UR-7860  | 1.0   | 0.0   | 0.0   | 0.0  | 1.0   | 0.0  |
| 21UR-78600 | 1.0   | 1.0   | 16.0  | 1.0  | 4.0   | 1.0  |
| 21UR-78610 | 0.0   | 0.0   | 0.0   | 0.0  | 0.0   | 0.0  |
| 21UR-78620 | 15.0  | 0.0   | 4.0   | 4.0  | 0.0   | 0.0  |
| 21UR-78630 | 0.0   | 0.0   | 1.0   | 0.0  | 0.0   | 0.0  |
| 21UR-78640 | 0.0   | 0.0   | 0.0   | 0.0  | 0.0   | 0.0  |
| 21UR-78650 | 0.0   | 0.0   | 0.0   | 0.0  | 0.0   | 0.0  |
| 21UR-78660 | 0.0   | 0.0   | 0.0   | 0.0  | 0.0   | 0.0  |
| 21UR-78670 | 8.0   | 1.0   | 8.0   | 4.0  | 6.0   | 0.0  |
| 21UR-78680 | 0.0   | 0.0   | 0.0   | 0.0  | 0.0   | 0.0  |
| 21UR-78690 | 0.0   | 0.0   | 0.0   | 0.0  | 0.0   | 0.0  |
| 21UR-7870  | 6.0   | 4.0   | 6.0   | 4.0  | 0.0   | 0.0  |
| 21UR-78700 | 0.0   | 0.0   | 0.0   | 0.0  | 1.0   | 0.0  |
| 21UR-78710 | 4.0   | 4.0   | 4.0   | 0.0  | 0.0   | 0.1  |
| 21UR-78720 | 3.0   | 4.0   | 0.0   | 1.0  | 0.0   | 0.0  |

|            |       |      |       |       |      |     |
|------------|-------|------|-------|-------|------|-----|
| 21UR-78730 | 0.0   | 0.0  | 0.0   | 0.0   | 0.0  | 0.0 |
| 21UR-78740 | 0.0   | 0.0  | 0.0   | 0.0   | 0.0  | 0.0 |
| 21UR-78750 | 0.0   | 0.0  | 0.0   | 0.0   | 0.0  | 0.0 |
| 21UR-78760 | 1.0   | 0.0  | 0.0   | 0.0   | 0.0  | 0.0 |
| 21UR-78770 | 0.0   | 0.0  | 0.0   | 1.0   | 0.0  | 0.0 |
| 21UR-78780 | 0.0   | 3.0  | 1.0   | 0.0   | 4.0  | 0.0 |
| 21UR-78790 | 0.0   | 0.0  | 0.0   | 0.0   | 0.0  | 0.0 |
| 21UR-7880  | 16.0  | 4.0  | 14.0  | 0.0   | 1.0  | 0.0 |
| 21UR-78800 | 27.0  | 0.0  | 14.0  | 10.0  | 5.0  | 0.0 |
| 21UR-78810 | 5.0   | 0.0  | 0.0   | 1.0   | 1.0  | 0.0 |
| 21UR-78820 | 0.0   | 0.0  | 0.0   | 0.0   | 0.0  | 0.0 |
| 21UR-78830 | 0.0   | 0.0  | 0.0   | 1.0   | 0.0  | 0.0 |
| 21UR-78840 | 0.0   | 0.0  | 0.0   | 0.0   | 0.0  | 0.0 |
| 21UR-78850 | 0.0   | 0.0  | 0.0   | 0.0   | 0.0  | 0.0 |
| 21UR-78860 | 0.0   | 1.0  | 0.0   | 0.0   | 0.0  | 0.0 |
| 21UR-78870 | 0.0   | 0.0  | 1.0   | 0.0   | 0.0  | 0.0 |
| 21UR-78880 | 0.0   | 1.0  | 0.0   | 0.0   | 0.0  | 0.0 |
| 21UR-78890 | 16.0  | 1.0  | 10.0  | 2.0   | 1.0  | 2.0 |
| 21UR-7890  | 0.0   | 0.1  | 0.0   | 1.0   | 2.0  | 0.0 |
| 21UR-78900 | 0.0   | 0.0  | 0.0   | 0.0   | 0.0  | 0.0 |
| 21UR-78910 | 0.0   | 1.0  | 0.0   | 0.0   | 0.1  | 0.0 |
| 21UR-78920 | 0.0   | 0.0  | 1.0   | 0.0   | 0.0  | 0.0 |
| 21UR-78930 | 0.0   | 0.0  | 0.0   | 0.0   | 0.0  | 0.0 |
| 21UR-78940 | 6.0   | 1.0  | 5.0   | 2.0   | 1.0  | 0.0 |
| 21UR-78950 | 0.0   | 0.0  | 1.0   | 0.0   | 0.0  | 0.0 |
| 21UR-78960 | 1.0   | 7.0  | 1.0   | 3.0   | 0.0  | 0.0 |
| 21UR-78970 | 1.0   | 4.0  | 4.0   | 0.0   | 0.0  | 0.0 |
| 21UR-78980 | 0.0   | 0.0  | 0.0   | 0.0   | 0.0  | 0.0 |
| 21UR-78990 | 0.0   | 0.0  | 0.0   | 0.0   | 0.0  | 0.0 |
| 21UR-790   | 69.0  | 0.0  | 42.0  | 24.0  | 8.0  | 0.0 |
| 21UR-7900  | 2.0   | 8.0  | 7.0   | 4.0   | 2.0  | 0.0 |
| 21UR-79000 | 1.0   | 0.0  | 0.0   | 0.0   | 0.0  | 0.0 |
| 21UR-79010 | 0.0   | 0.0  | 0.0   | 0.0   | 0.0  | 0.0 |
| 21UR-79030 | 0.0   | 0.0  | 0.0   | 0.0   | 0.0  | 0.0 |
| 21UR-79040 | 0.0   | 1.0  | 0.0   | 0.0   | 0.0  | 0.0 |
| 21UR-79050 | 0.0   | 0.0  | 0.0   | 0.0   | 0.0  | 0.0 |
| 21UR-79060 | 0.0   | 0.0  | 0.0   | 0.0   | 0.0  | 0.0 |
| 21UR-79070 | 0.0   | 0.0  | 0.0   | 0.0   | 0.0  | 0.0 |
| 21UR-79080 | 0.0   | 0.0  | 0.0   | 0.0   | 0.0  | 0.0 |
| 21UR-7910  | 649.0 | 32.0 | 470.0 | 130.0 | 33.0 | 7.0 |
| 21UR-79100 | 1.0   | 0.0  | 4.0   | 2.0   | 0.0  | 0.0 |
| 21UR-79110 | 6.0   | 0.0  | 0.0   | 0.0   | 0.0  | 0.0 |
| 21UR-79120 | 1.0   | 0.0  | 0.0   | 0.0   | 0.0  | 0.0 |
| 21UR-79130 | 0.0   | 0.0  | 1.0   | 0.0   | 0.0  | 0.0 |
| 21UR-79140 | 0.0   | 0.5  | 0.0   | 0.0   | 0.0  | 0.0 |
| 21UR-79150 | 0.0   | 0.0  | 0.0   | 0.0   | 0.0  | 0.0 |
| 21UR-79160 | 3.0   | 0.0  | 3.0   | 0.0   | 0.0  | 0.0 |
| 21UR-79170 | 0.0   | 0.0  | 0.0   | 0.0   | 0.0  | 0.0 |
| 21UR-79180 | 0.0   | 0.0  | 0.0   | 0.0   | 0.0  | 0.0 |
| 21UR-79190 | 0.0   | 1.0  | 0.0   | 0.0   | 1.0  | 0.0 |
| 21UR-7920  | 0.0   | 0.0  | 0.0   | 0.0   | 0.0  | 0.0 |

|            |       |      |       |      |      |     |
|------------|-------|------|-------|------|------|-----|
| 21UR-79200 | 0.0   | 0.0  | 0.0   | 0.0  | 0.0  | 0.2 |
| 21UR-79210 | 0.0   | 0.0  | 0.0   | 0.0  | 0.0  | 0.0 |
| 21UR-79220 | 0.0   | 0.0  | 0.0   | 0.0  | 0.0  | 0.0 |
| 21UR-79230 | 0.0   | 0.0  | 0.0   | 0.0  | 0.0  | 0.0 |
| 21UR-79240 | 0.0   | 0.0  | 0.0   | 0.0  | 0.0  | 0.0 |
| 21UR-79250 | 0.0   | 0.0  | 0.0   | 0.0  | 0.0  | 0.0 |
| 21UR-79260 | 0.0   | 0.0  | 0.0   | 0.0  | 0.0  | 0.0 |
| 21UR-79270 | 0.0   | 0.0  | 0.0   | 0.0  | 0.0  | 0.0 |
| 21UR-79280 | 0.0   | 2.4  | 0.0   | 0.0  | 7.0  | 0.0 |
| 21UR-79290 | 0.0   | 0.0  | 0.0   | 0.0  | 0.0  | 0.0 |
| 21UR-7930  | 0.0   | 0.0  | 1.0   | 0.0  | 0.0  | 0.0 |
| 21UR-79300 | 1.0   | 1.4  | 0.0   | 0.0  | 0.0  | 0.1 |
| 21UR-79310 | 0.0   | 0.0  | 0.0   | 0.0  | 3.0  | 0.0 |
| 21UR-79320 | 1.0   | 0.0  | 1.0   | 0.0  | 0.0  | 1.0 |
| 21UR-79330 | 0.0   | 0.0  | 0.0   | 0.0  | 0.0  | 0.0 |
| 21UR-79340 | 0.0   | 5.0  | 0.0   | 4.0  | 0.0  | 0.0 |
| 21UR-79350 | 5.0   | 4.0  | 4.0   | 4.0  | 8.0  | 0.0 |
| 21UR-79360 | 4.0   | 6.0  | 1.0   | 0.0  | 0.0  | 0.0 |
| 21UR-79370 | 0.0   | 0.0  | 0.0   | 0.0  | 0.0  | 0.0 |
| 21UR-79390 | 44.0  | 7.0  | 14.0  | 3.0  | 7.0  | 0.0 |
| 21UR-7940  | 0.0   | 0.0  | 0.0   | 0.0  | 0.0  | 0.0 |
| 21UR-79400 | 0.0   | 0.1  | 0.0   | 0.0  | 0.0  | 0.0 |
| 21UR-79410 | 0.0   | 0.0  | 0.0   | 0.0  | 0.0  | 0.0 |
| 21UR-79420 | 0.0   | 0.0  | 0.0   | 0.0  | 0.0  | 0.0 |
| 21UR-79430 | 0.0   | 0.0  | 0.0   | 0.0  | 0.0  | 0.0 |
| 21UR-79440 | 0.0   | 0.0  | 0.0   | 0.0  | 0.0  | 0.0 |
| 21UR-79450 | 0.0   | 0.0  | 0.0   | 0.0  | 0.0  | 0.0 |
| 21UR-79460 | 0.0   | 4.0  | 4.0   | 0.0  | 0.0  | 0.0 |
| 21UR-79470 | 0.0   | 1.0  | 0.0   | 0.0  | 0.0  | 0.0 |
| 21UR-79480 | 0.0   | 0.0  | 0.0   | 0.0  | 0.0  | 0.0 |
| 21UR-7950  | 0.0   | 0.0  | 0.0   | 0.0  | 0.0  | 0.0 |
| 21UR-79500 | 160.5 | 96.5 | 156.5 | 71.5 | 53.5 | 2.0 |
| 21UR-79510 | 0.0   | 0.0  | 0.0   | 0.0  | 0.0  | 0.0 |
| 21UR-79520 | 0.0   | 0.0  | 0.0   | 0.0  | 1.0  | 0.0 |
| 21UR-79530 | 0.0   | 0.0  | 4.0   | 0.0  | 0.2  | 0.0 |
| 21UR-79550 | 0.0   | 0.0  | 0.0   | 0.0  | 1.0  | 0.0 |
| 21UR-79560 | 0.0   | 0.0  | 0.0   | 0.0  | 0.0  | 0.0 |
| 21UR-79570 | 0.0   | 0.0  | 0.0   | 0.0  | 0.0  | 0.0 |
| 21UR-79580 | 8.0   | 0.0  | 6.0   | 1.0  | 0.0  | 1.0 |
| 21UR-79590 | 0.0   | 0.0  | 0.0   | 0.0  | 2.0  | 0.0 |
| 21UR-7960  | 42.0  | 6.0  | 32.0  | 8.0  | 12.0 | 0.0 |
| 21UR-79600 | 0.0   | 0.0  | 0.0   | 0.0  | 0.0  | 0.0 |
| 21UR-79610 | 0.0   | 0.0  | 0.0   | 0.0  | 1.0  | 0.0 |
| 21UR-79620 | 0.0   | 0.0  | 1.0   | 4.0  | 2.0  | 0.0 |
| 21UR-79630 | 0.0   | 0.0  | 0.0   | 0.0  | 0.0  | 0.0 |
| 21UR-79640 | 0.0   | 0.0  | 0.0   | 0.0  | 0.0  | 0.0 |
| 21UR-79650 | 0.0   | 0.0  | 0.0   | 0.0  | 0.0  | 0.0 |
| 21UR-79670 | 0.0   | 0.0  | 0.0   | 0.0  | 0.0  | 0.0 |
| 21UR-79680 | 0.0   | 0.0  | 1.0   | 0.0  | 0.0  | 0.0 |
| 21UR-79690 | 1.0   | 0.0  | 0.0   | 0.0  | 0.0  | 0.0 |
| 21UR-7970  | 1.0   | 6.0  | 1.0   | 0.0  | 6.0  | 0.0 |

|            |        |       |        |       |       |      |
|------------|--------|-------|--------|-------|-------|------|
| 21UR-79700 | 0.0    | 2.0   | 2.0    | 0.0   | 0.0   | 0.0  |
| 21UR-79720 | 0.0    | 0.0   | 0.0    | 0.0   | 0.0   | 0.0  |
| 21UR-79730 | 1.0    | 1.0   | 0.0    | 0.0   | 9.0   | 1.0  |
| 21UR-79740 | 0.0    | 0.0   | 0.0    | 0.0   | 0.1   | 0.0  |
| 21UR-79750 | 1.0    | 0.0   | 0.0    | 0.0   | 0.0   | 0.0  |
| 21UR-79760 | 0.0    | 0.0   | 0.0    | 0.0   | 0.0   | 0.0  |
| 21UR-79770 | 0.0    | 0.0   | 0.0    | 0.0   | 0.0   | 0.0  |
| 21UR-79780 | 2.0    | 0.0   | 1.0    | 0.0   | 2.0   | 1.0  |
| 21UR-79790 | 6.0    | 4.0   | 5.0    | 0.0   | 4.0   | 0.0  |
| 21UR-7980  | 1375.7 | 117.0 | 1168.5 | 401.0 | 114.0 | 21.0 |
| 21UR-79800 | 6.0    | 0.0   | 0.0    | 1.0   | 0.0   | 0.0  |
| 21UR-79810 | 0.0    | 0.0   | 0.0    | 0.0   | 0.0   | 0.0  |
| 21UR-79820 | 1.0    | 0.0   | 0.0    | 0.0   | 0.0   | 0.0  |
| 21UR-79830 | 0.0    | 0.0   | 0.0    | 0.0   | 0.0   | 0.0  |
| 21UR-79840 | 4.0    | 5.0   | 3.0    | 1.0   | 12.0  | 4.0  |
| 21UR-79850 | 0.0    | 0.0   | 0.0    | 0.0   | 0.0   | 0.0  |
| 21UR-79860 | 3.0    | 5.0   | 6.0    | 0.0   | 4.0   | 0.0  |
| 21UR-79870 | 72.0   | 45.0  | 68.0   | 24.0  | 162.0 | 2.0  |
| 21UR-79880 | 0.0    | 0.0   | 0.0    | 0.0   | 0.0   | 0.0  |
| 21UR-7990  | 0.0    | 0.0   | 0.0    | 0.0   | 0.0   | 0.0  |
| 21UR-79900 | 0.0    | 0.0   | 0.0    | 4.0   | 4.0   | 0.0  |
| 21UR-79910 | 0.0    | 0.0   | 0.0    | 1.0   | 1.0   | 0.0  |
| 21UR-79920 | 17.0   | 0.0   | 14.5   | 2.7   | 9.0   | 4.0  |
| 21UR-79930 | 0.0    | 0.0   | 1.0    | 0.0   | 0.0   | 0.0  |
| 21UR-79940 | 0.0    | 0.0   | 1.0    | 0.0   | 0.0   | 0.0  |
| 21UR-79950 | 1.0    | 0.0   | 1.0    | 1.0   | 0.0   | 0.0  |
| 21UR-79970 | 43.0   | 71.0  | 22.0   | 6.0   | 41.5  | 12.0 |
| 21UR-79980 | 0.0    | 0.0   | 0.0    | 0.0   | 0.0   | 0.0  |
| 21UR-79990 | 1.0    | 0.0   | 0.0    | 0.0   | 0.0   | 0.0  |
| 21UR-80    | 2.0    | 1.0   | 1.0    | 0.0   | 1.0   | 0.0  |
| 21UR-800   | 0.0    | 0.0   | 1.0    | 1.0   | 1.0   | 0.0  |
| 21UR-8000  | 1.0    | 0.0   | 0.0    | 0.0   | 3.0   | 1.1  |
| 21UR-80000 | 0.0    | 0.0   | 0.0    | 0.0   | 0.0   | 0.0  |
| 21UR-80010 | 0.0    | 0.0   | 0.0    | 0.0   | 0.0   | 0.0  |
| 21UR-80020 | 0.0    | 0.0   | 0.0    | 0.0   | 0.0   | 0.0  |
| 21UR-80030 | 0.0    | 1.0   | 0.0    | 0.0   | 0.0   | 0.0  |
| 21UR-80040 | 0.0    | 0.0   | 0.0    | 0.0   | 0.0   | 0.0  |
| 21UR-80050 | 0.0    | 0.0   | 1.0    | 0.0   | 0.0   | 0.0  |
| 21UR-80060 | 0.0    | 0.0   | 0.0    | 0.0   | 0.1   | 0.0  |
| 21UR-80070 | 0.0    | 0.0   | 0.0    | 0.0   | 0.0   | 0.0  |
| 21UR-80080 | 8.3    | 4.0   | 10.0   | 1.0   | 6.0   | 0.0  |
| 21UR-80090 | 1.0    | 0.0   | 0.0    | 0.0   | 0.0   | 0.0  |
| 21UR-8010  | 1.0    | 13.0  | 4.0    | 0.0   | 9.0   | 0.0  |
| 21UR-80100 | 0.0    | 4.0   | 0.0    | 0.0   | 0.0   | 0.0  |
| 21UR-80110 | 0.0    | 0.5   | 0.0    | 0.0   | 0.0   | 0.0  |
| 21UR-80120 | 1.0    | 0.0   | 0.0    | 0.0   | 0.0   | 0.0  |
| 21UR-80130 | 8.0    | 29.0  | 13.0   | 4.0   | 21.3  | 3.0  |
| 21UR-80140 | 4.0    | 0.0   | 6.0    | 0.0   | 1.0   | 0.0  |
| 21UR-80150 | 0.0    | 0.0   | 0.0    | 0.0   | 0.0   | 0.0  |
| 21UR-80160 | 0.0    | 0.0   | 0.0    | 0.0   | 0.0   | 0.0  |
| 21UR-80170 | 0.0    | 0.0   | 0.0    | 0.0   | 0.0   | 0.0  |

|            |      |       |       |      |       |      |
|------------|------|-------|-------|------|-------|------|
| 21UR-80180 | 0.0  | 0.0   | 0.0   | 0.0  | 0.0   | 0.0  |
| 21UR-80190 | 0.0  | 0.0   | 1.0   | 0.0  | 0.0   | 0.0  |
| 21UR-8020  | 1.0  | 2.0   | 1.0   | 1.0  | 4.0   | 0.0  |
| 21UR-80200 | 0.0  | 0.0   | 0.0   | 0.0  | 0.0   | 0.0  |
| 21UR-80210 | 0.0  | 4.0   | 0.0   | 0.0  | 1.0   | 2.0  |
| 21UR-80220 | 1.0  | 0.0   | 0.0   | 0.0  | 0.0   | 0.0  |
| 21UR-80230 | 0.0  | 1.0   | 1.0   | 0.0  | 0.0   | 0.0  |
| 21UR-80240 | 0.0  | 1.0   | 0.0   | 0.0  | 0.0   | 1.0  |
| 21UR-80250 | 1.0  | 0.0   | 0.0   | 1.0  | 1.0   | 0.0  |
| 21UR-80260 | 0.0  | 0.0   | 0.0   | 0.0  | 0.0   | 0.0  |
| 21UR-80270 | 0.0  | 0.0   | 0.0   | 0.0  | 0.0   | 0.0  |
| 21UR-80280 | 1.0  | 1.0   | 2.0   | 0.0  | 1.0   | 0.0  |
| 21UR-80290 | 0.0  | 1.0   | 1.0   | 0.0  | 4.0   | 1.0  |
| 21UR-80300 | 0.0  | 0.0   | 0.0   | 0.0  | 0.0   | 0.0  |
| 21UR-80310 | 1.0  | 1.0   | 0.0   | 0.0  | 4.0   | 1.0  |
| 21UR-80320 | 0.0  | 0.0   | 0.0   | 0.0  | 0.0   | 0.0  |
| 21UR-80330 | 0.0  | 0.0   | 1.0   | 0.0  | 0.0   | 0.0  |
| 21UR-80340 | 0.0  | 0.0   | 0.0   | 0.0  | 0.0   | 0.0  |
| 21UR-80350 | 0.0  | 0.3   | 0.0   | 0.0  | 0.0   | 0.0  |
| 21UR-80360 | 0.0  | 0.0   | 1.0   | 0.0  | 0.0   | 0.0  |
| 21UR-80370 | 13.0 | 16.0  | 10.0  | 1.0  | 28.0  | 2.0  |
| 21UR-80380 | 1.0  | 0.0   | 0.0   | 0.0  | 0.0   | 0.0  |
| 21UR-80390 | 8.0  | 0.0   | 4.0   | 0.0  | 0.0   | 0.0  |
| 21UR-8040  | 0.0  | 0.0   | 0.0   | 0.0  | 1.0   | 0.0  |
| 21UR-80400 | 60.9 | 6.0   | 63.9  | 12.0 | 12.0  | 1.0  |
| 21UR-80410 | 1.0  | 2.0   | 0.0   | 0.0  | 0.0   | 0.0  |
| 21UR-80420 | 0.0  | 0.0   | 0.0   | 0.0  | 0.0   | 0.0  |
| 21UR-80430 | 1.0  | 0.0   | 0.0   | 0.0  | 0.0   | 0.0  |
| 21UR-80440 | 0.0  | 0.0   | 0.0   | 0.0  | 0.0   | 0.0  |
| 21UR-80450 | 0.0  | 0.0   | 0.0   | 0.0  | 0.0   | 0.0  |
| 21UR-80460 | 0.0  | 0.0   | 0.0   | 0.0  | 0.0   | 0.0  |
| 21UR-80470 | 0.0  | 0.0   | 0.0   | 0.0  | 0.0   | 0.0  |
| 21UR-80480 | 0.0  | 0.0   | 0.0   | 0.0  | 0.0   | 0.0  |
| 21UR-80490 | 0.0  | 0.0   | 1.0   | 0.0  | 0.0   | 0.0  |
| 21UR-8050  | 1.0  | 0.0   | 0.0   | 0.0  | 0.0   | 0.0  |
| 21UR-80500 | 0.0  | 0.0   | 0.0   | 0.0  | 0.0   | 0.0  |
| 21UR-80510 | 0.0  | 0.0   | 0.0   | 0.0  | 0.0   | 0.0  |
| 21UR-80520 | 0.0  | 0.2   | 1.0   | 0.0  | 0.0   | 0.0  |
| 21UR-80530 | 85.0 | 16.0  | 94.0  | 26.0 | 39.0  | 9.0  |
| 21UR-80540 | 0.0  | 0.0   | 0.0   | 0.0  | 0.0   | 0.0  |
| 21UR-80550 | 0.0  | 0.0   | 0.0   | 0.0  | 0.0   | 0.0  |
| 21UR-80560 | 0.0  | 0.0   | 0.0   | 0.0  | 0.0   | 0.0  |
| 21UR-80570 | 62.0 | 456.5 | 132.0 | 37.0 | 590.0 | 56.0 |
| 21UR-80580 | 0.0  | 0.0   | 0.0   | 0.0  | 0.0   | 0.0  |
| 21UR-80590 | 0.0  | 1.0   | 0.0   | 0.0  | 0.0   | 0.0  |
| 21UR-8060  | 0.0  | 0.0   | 0.0   | 1.0  | 0.0   | 0.0  |
| 21UR-80600 | 59.5 | 73.0  | 113.5 | 45.0 | 190.5 | 11.0 |
| 21UR-80610 | 0.0  | 0.0   | 0.0   | 0.0  | 0.0   | 0.0  |
| 21UR-80620 | 4.0  | 1.0   | 4.0   | 1.0  | 4.0   | 1.0  |
| 21UR-80630 | 1.0  | 0.0   | 0.0   | 0.0  | 0.0   | 0.0  |
| 21UR-80640 | 0.0  | 1.0   | 0.0   | 0.0  | 0.0   | 0.0  |



|            |      |      |      |      |       |      |
|------------|------|------|------|------|-------|------|
| 21UR-80650 | 52.1 | 12.0 | 52.0 | 38.0 | 10.0  | 0.0  |
| 21UR-80660 | 16.0 | 0.0  | 18.0 | 4.0  | 8.0   | 0.0  |
| 21UR-80670 | 0.0  | 0.0  | 0.0  | 0.0  | 0.0   | 0.0  |
| 21UR-80680 | 1.0  | 0.0  | 0.0  | 0.0  | 1.0   | 0.0  |
| 21UR-80690 | 0.0  | 0.0  | 0.0  | 0.0  | 0.0   | 0.0  |
| 21UR-8070  | 4.0  | 14.0 | 8.0  | 1.0  | 18.0  | 1.0  |
| 21UR-80700 | 54.0 | 72.0 | 77.0 | 40.0 | 102.5 | 10.0 |
| 21UR-80710 | 0.0  | 0.0  | 0.0  | 0.0  | 0.0   | 0.0  |
| 21UR-80720 | 0.0  | 0.0  | 0.0  | 0.0  | 0.0   | 0.0  |
| 21UR-80730 | 0.0  | 0.0  | 0.0  | 0.0  | 0.0   | 0.0  |
| 21UR-80740 | 25.0 | 4.0  | 35.0 | 9.0  | 3.0   | 0.0  |
| 21UR-80750 | 0.0  | 0.0  | 0.0  | 0.0  | 0.0   | 0.0  |
| 21UR-80760 | 1.0  | 1.0  | 2.0  | 0.0  | 2.0   | 1.0  |
| 21UR-80770 | 0.0  | 1.0  | 0.0  | 0.0  | 0.0   | 0.0  |
| 21UR-80780 | 0.0  | 0.0  | 0.0  | 0.0  | 0.0   | 0.0  |
| 21UR-80790 | 0.0  | 0.0  | 0.0  | 0.0  | 0.0   | 0.0  |
| 21UR-8080  | 0.0  | 0.0  | 0.0  | 0.0  | 0.0   | 0.0  |
| 21UR-80800 | 0.0  | 2.0  | 0.0  | 0.0  | 0.0   | 0.0  |
| 21UR-80810 | 0.0  | 0.0  | 0.0  | 0.0  | 0.0   | 0.0  |
| 21UR-80820 | 6.0  | 3.0  | 8.0  | 2.0  | 2.0   | 0.0  |
| 21UR-80830 | 4.0  | 0.1  | 1.0  | 0.0  | 0.0   | 0.1  |
| 21UR-80840 | 0.0  | 0.0  | 0.0  | 0.0  | 0.0   | 0.0  |
| 21UR-80850 | 0.0  | 0.0  | 0.0  | 0.0  | 0.0   | 0.0  |
| 21UR-80860 | 0.0  | 0.0  | 0.0  | 0.0  | 0.0   | 0.0  |
| 21UR-80870 | 1.0  | 0.0  | 0.0  | 0.0  | 0.0   | 0.0  |
| 21UR-80880 | 1.0  | 0.0  | 0.0  | 0.0  | 0.0   | 0.0  |
| 21UR-80890 | 0.0  | 0.0  | 0.0  | 0.0  | 0.0   | 0.0  |
| 21UR-8090  | 0.0  | 0.0  | 0.0  | 0.0  | 0.0   | 0.0  |
| 21UR-80900 | 4.0  | 1.0  | 1.0  | 1.0  | 2.0   | 0.0  |
| 21UR-80910 | 50.0 | 59.0 | 47.0 | 74.0 | 123.7 | 10.0 |
| 21UR-80920 | 0.0  | 0.0  | 0.0  | 0.0  | 0.0   | 0.0  |
| 21UR-80930 | 57.0 | 15.0 | 49.0 | 5.0  | 27.0  | 4.0  |
| 21UR-80940 | 0.0  | 0.3  | 0.0  | 0.0  | 0.0   | 0.0  |
| 21UR-80950 | 1.0  | 3.0  | 1.0  | 0.0  | 10.0  | 0.0  |
| 21UR-80960 | 0.0  | 0.0  | 0.0  | 0.0  | 0.0   | 0.0  |
| 21UR-80970 | 0.0  | 0.0  | 0.0  | 0.0  | 0.0   | 0.0  |
| 21UR-80980 | 1.0  | 0.0  | 1.0  | 0.0  | 0.0   | 0.0  |
| 21UR-80990 | 0.0  | 4.0  | 0.0  | 0.0  | 0.0   | 0.0  |
| 21UR-810   | 0.0  | 1.0  | 0.0  | 0.0  | 0.0   | 0.0  |
| 21UR-8100  | 4.0  | 5.5  | 1.0  | 0.0  | 0.0   | 0.0  |
| 21UR-81000 | 39.0 | 8.0  | 17.0 | 6.0  | 2.0   | 1.0  |
| 21UR-81020 | 0.0  | 0.0  | 0.0  | 0.0  | 0.0   | 0.0  |
| 21UR-81030 | 0.0  | 0.0  | 1.0  | 0.0  | 0.0   | 0.0  |
| 21UR-81040 | 0.0  | 0.0  | 1.0  | 0.0  | 0.0   | 0.0  |
| 21UR-81050 | 0.0  | 0.0  | 0.0  | 0.0  | 0.0   | 0.0  |
| 21UR-81060 | 8.0  | 1.0  | 9.0  | 6.0  | 0.0   | 0.0  |
| 21UR-81070 | 0.0  | 0.0  | 0.0  | 1.0  | 0.0   | 0.0  |
| 21UR-81080 | 0.0  | 0.0  | 0.0  | 0.0  | 4.0   | 0.0  |
| 21UR-81090 | 0.0  | 1.0  | 1.0  | 1.0  | 1.0   | 0.0  |
| 21UR-8110  | 0.0  | 0.0  | 0.0  | 0.0  | 0.0   | 0.0  |
| 21UR-81100 | 0.0  | 0.0  | 0.0  | 0.0  | 0.0   | 0.0  |

|            |       |       |       |      |       |      |
|------------|-------|-------|-------|------|-------|------|
| 21UR-81110 | 0.0   | 0.0   | 1.0   | 0.0  | 0.0   | 1.0  |
| 21UR-81120 | 0.0   | 0.0   | 0.0   | 0.0  | 0.0   | 0.0  |
| 21UR-81130 | 0.0   | 0.0   | 0.0   | 0.0  | 0.0   | 0.0  |
| 21UR-81140 | 1.0   | 0.0   | 0.0   | 0.0  | 1.0   | 0.0  |
| 21UR-81150 | 0.0   | 0.0   | 0.0   | 0.0  | 0.0   | 0.0  |
| 21UR-81160 | 1.0   | 0.0   | 1.0   | 1.0  | 0.0   | 0.0  |
| 21UR-81170 | 1.5   | 0.0   | 1.0   | 1.0  | 0.0   | 0.0  |
| 21UR-81180 | 0.0   | 0.0   | 0.0   | 0.0  | 0.0   | 0.0  |
| 21UR-81190 | 1.0   | 0.0   | 0.0   | 0.0  | 5.0   | 0.0  |
| 21UR-8120  | 66.0  | 42.0  | 42.5  | 24.0 | 64.0  | 5.0  |
| 21UR-81200 | 1.0   | 5.0   | 1.0   | 1.5  | 0.0   | 0.0  |
| 21UR-81210 | 12.0  | 0.0   | 6.0   | 6.0  | 2.0   | 0.0  |
| 21UR-81220 | 0.0   | 0.0   | 0.0   | 0.0  | 0.0   | 0.0  |
| 21UR-81230 | 4.0   | 0.0   | 0.0   | 0.0  | 0.0   | 0.0  |
| 21UR-81240 | 25.0  | 9.0   | 23.0  | 21.0 | 0.0   | 0.0  |
| 21UR-81250 | 0.0   | 0.0   | 0.0   | 0.0  | 0.0   | 0.0  |
| 21UR-81260 | 0.0   | 0.0   | 0.0   | 0.0  | 0.0   | 0.0  |
| 21UR-81270 | 0.0   | 0.0   | 0.0   | 0.0  | 0.0   | 0.0  |
| 21UR-81280 | 0.0   | 0.0   | 0.0   | 0.0  | 0.0   | 0.0  |
| 21UR-81290 | 0.0   | 0.0   | 0.0   | 0.0  | 0.0   | 0.0  |
| 21UR-8130  | 1.0   | 0.0   | 0.0   | 0.0  | 0.0   | 0.0  |
| 21UR-81300 | 0.0   | 0.0   | 0.0   | 0.0  | 0.0   | 0.0  |
| 21UR-81310 | 2.0   | 18.0  | 3.0   | 1.0  | 0.0   | 0.0  |
| 21UR-81320 | 0.0   | 0.0   | 0.0   | 0.0  | 0.0   | 0.0  |
| 21UR-81330 | 0.0   | 0.0   | 0.0   | 0.0  | 0.0   | 0.1  |
| 21UR-81340 | 232.5 | 161.7 | 245.5 | 82.0 | 173.0 | 16.0 |
| 21UR-81350 | 0.0   | 1.0   | 0.0   | 0.0  | 4.0   | 0.0  |
| 21UR-81360 | 0.0   | 0.0   | 0.0   | 0.0  | 0.0   | 0.0  |
| 21UR-81370 | 0.0   | 0.0   | 0.0   | 0.0  | 0.0   | 0.0  |
| 21UR-81380 | 1.0   | 0.0   | 0.0   | 0.0  | 0.0   | 0.0  |
| 21UR-81390 | 0.0   | 6.0   | 0.0   | 0.0  | 0.0   | 0.0  |
| 21UR-8140  | 0.0   | 0.0   | 0.0   | 0.0  | 0.0   | 0.0  |
| 21UR-81400 | 0.0   | 0.0   | 4.0   | 0.0  | 0.0   | 1.4  |
| 21UR-81410 | 12.0  | 12.0  | 5.1   | 1.0  | 18.0  | 0.0  |
| 21UR-81430 | 48.0  | 5.0   | 33.0  | 7.0  | 25.0  | 0.0  |
| 21UR-81440 | 0.0   | 0.0   | 0.0   | 0.0  | 0.0   | 0.0  |
| 21UR-81450 | 0.0   | 0.0   | 0.0   | 0.0  | 0.0   | 0.0  |
| 21UR-81460 | 0.0   | 0.0   | 0.0   | 0.0  | 0.0   | 0.0  |
| 21UR-81470 | 0.0   | 0.0   | 0.0   | 0.0  | 0.0   | 0.0  |
| 21UR-81480 | 16.0  | 0.0   | 12.0  | 4.0  | 4.0   | 0.0  |
| 21UR-81490 | 0.0   | 0.0   | 0.0   | 0.0  | 0.0   | 0.0  |
| 21UR-8150  | 0.0   | 0.0   | 0.0   | 0.0  | 0.0   | 0.0  |
| 21UR-81500 | 0.0   | 1.0   | 1.0   | 1.0  | 2.0   | 0.0  |
| 21UR-81510 | 0.0   | 0.0   | 0.0   | 0.0  | 0.0   | 0.0  |
| 21UR-81520 | 0.0   | 0.0   | 0.0   | 0.0  | 0.0   | 0.0  |
| 21UR-81530 | 0.0   | 0.0   | 0.0   | 0.0  | 0.0   | 1.0  |
| 21UR-81540 | 0.0   | 0.0   | 0.0   | 0.0  | 0.0   | 0.0  |
| 21UR-81550 | 0.0   | 0.0   | 0.0   | 0.0  | 0.0   | 0.0  |
| 21UR-81560 | 0.0   | 1.0   | 0.0   | 0.0  | 1.0   | 0.0  |
| 21UR-81570 | 0.0   | 0.0   | 0.0   | 0.0  | 0.0   | 0.0  |
| 21UR-81580 | 0.0   | 0.0   | 0.0   | 0.0  | 0.0   | 0.0  |

|            |      |     |      |     |      |     |
|------------|------|-----|------|-----|------|-----|
| 21UR-81590 | 10.0 | 4.0 | 8.0  | 2.0 | 7.0  | 1.0 |
| 21UR-8160  | 0.0  | 0.0 | 0.0  | 0.0 | 0.0  | 0.0 |
| 21UR-81600 | 0.0  | 1.0 | 0.0  | 0.0 | 0.0  | 0.0 |
| 21UR-81610 | 36.0 | 1.0 | 32.0 | 2.0 | 1.0  | 0.0 |
| 21UR-81620 | 1.0  | 0.0 | 0.0  | 1.0 | 0.0  | 0.0 |
| 21UR-81630 | 0.0  | 3.0 | 0.0  | 0.0 | 0.0  | 0.0 |
| 21UR-81640 | 0.0  | 0.0 | 0.0  | 0.0 | 0.0  | 0.0 |
| 21UR-81650 | 0.0  | 0.0 | 0.0  | 0.0 | 1.0  | 0.0 |
| 21UR-81660 | 0.0  | 0.0 | 0.0  | 0.0 | 0.0  | 1.0 |
| 21UR-81670 | 0.0  | 1.0 | 0.0  | 0.0 | 1.0  | 0.0 |
| 21UR-81680 | 0.0  | 0.0 | 0.0  | 0.0 | 0.0  | 0.0 |
| 21UR-81690 | 1.0  | 0.0 | 0.0  | 0.0 | 4.0  | 0.0 |
| 21UR-8170  | 0.0  | 0.0 | 0.0  | 0.0 | 0.0  | 0.0 |
| 21UR-81700 | 0.0  | 0.0 | 0.0  | 0.0 | 1.0  | 0.0 |
| 21UR-81710 | 0.0  | 0.0 | 1.0  | 0.0 | 0.0  | 0.0 |
| 21UR-81720 | 0.0  | 0.0 | 0.0  | 0.0 | 0.0  | 0.0 |
| 21UR-81730 | 0.1  | 0.0 | 0.0  | 0.0 | 0.0  | 0.0 |
| 21UR-81740 | 17.0 | 0.0 | 14.0 | 6.0 | 6.0  | 0.0 |
| 21UR-81750 | 1.0  | 1.0 | 1.0  | 1.0 | 1.0  | 0.0 |
| 21UR-81760 | 1.0  | 2.0 | 0.0  | 0.0 | 1.0  | 0.0 |
| 21UR-81770 | 0.0  | 0.0 | 0.0  | 0.0 | 0.0  | 0.0 |
| 21UR-81780 | 0.0  | 0.0 | 0.0  | 0.0 | 0.0  | 0.0 |
| 21UR-81790 | 0.0  | 0.0 | 0.0  | 0.0 | 0.0  | 1.0 |
| 21UR-8180  | 0.0  | 4.0 | 0.0  | 0.0 | 6.7  | 2.0 |
| 21UR-81800 | 0.0  | 0.7 | 0.0  | 0.0 | 0.0  | 0.0 |
| 21UR-81810 | 0.0  | 0.0 | 0.0  | 0.0 | 0.0  | 0.0 |
| 21UR-81820 | 0.0  | 0.0 | 0.0  | 0.0 | 0.0  | 0.0 |
| 21UR-81830 | 2.0  | 3.0 | 5.0  | 4.0 | 12.0 | 0.0 |
| 21UR-81840 | 0.0  | 0.0 | 0.0  | 0.0 | 0.0  | 0.0 |
| 21UR-81850 | 0.0  | 0.0 | 0.0  | 0.0 | 0.0  | 0.0 |
| 21UR-81860 | 1.0  | 1.0 | 9.0  | 0.0 | 1.0  | 0.0 |
| 21UR-81870 | 0.0  | 0.0 | 0.0  | 0.0 | 0.0  | 0.0 |
| 21UR-81880 | 1.0  | 0.0 | 1.0  | 1.0 | 3.0  | 0.0 |
| 21UR-81890 | 0.0  | 0.0 | 0.0  | 0.0 | 0.0  | 0.0 |
| 21UR-8190  | 0.0  | 0.0 | 0.0  | 1.0 | 10.0 | 0.0 |
| 21UR-81900 | 0.0  | 0.0 | 0.0  | 0.0 | 0.0  | 0.0 |
| 21UR-81910 | 8.5  | 1.0 | 7.0  | 1.0 | 1.0  | 0.0 |
| 21UR-81920 | 0.0  | 0.0 | 1.3  | 0.0 | 4.0  | 0.0 |
| 21UR-81930 | 0.0  | 0.0 | 0.0  | 0.0 | 0.1  | 0.0 |
| 21UR-81950 | 0.0  | 0.0 | 0.0  | 0.0 | 0.0  | 0.0 |
| 21UR-81960 | 0.0  | 1.3 | 0.0  | 0.0 | 0.0  | 0.0 |
| 21UR-81970 | 0.0  | 0.0 | 0.0  | 0.0 | 0.0  | 0.0 |
| 21UR-81980 | 2.0  | 3.0 | 2.0  | 0.0 | 12.0 | 2.0 |
| 21UR-81990 | 0.0  | 0.0 | 0.0  | 0.0 | 0.0  | 0.0 |
| 21UR-820   | 13.0 | 5.0 | 17.0 | 1.0 | 22.0 | 0.0 |
| 21UR-8200  | 0.0  | 0.0 | 0.0  | 0.0 | 1.0  | 0.0 |
| 21UR-82000 | 0.0  | 0.0 | 0.0  | 0.0 | 0.0  | 0.0 |
| 21UR-82010 | 0.0  | 1.0 | 0.0  | 0.0 | 4.0  | 0.0 |
| 21UR-82020 | 1.0  | 0.0 | 0.0  | 0.0 | 0.0  | 0.0 |
| 21UR-82030 | 0.0  | 0.0 | 0.0  | 0.0 | 0.0  | 0.0 |
| 21UR-82040 | 0.0  | 0.0 | 0.0  | 0.0 | 0.0  | 0.0 |

|            |       |      |       |      |      |     |
|------------|-------|------|-------|------|------|-----|
| 21UR-82050 | 0.0   | 1.0  | 0.0   | 0.0  | 0.0  | 0.0 |
| 21UR-82060 | 1.0   | 0.0  | 0.0   | 0.0  | 0.0  | 0.0 |
| 21UR-82070 | 0.0   | 1.0  | 1.0   | 0.0  | 3.0  | 1.0 |
| 21UR-82080 | 0.0   | 0.0  | 0.0   | 0.0  | 0.0  | 0.0 |
| 21UR-82090 | 0.0   | 0.0  | 0.0   | 0.0  | 0.0  | 0.0 |
| 21UR-8210  | 0.0   | 1.0  | 0.0   | 0.0  | 4.0  | 0.0 |
| 21UR-82100 | 2.0   | 9.0  | 3.0   | 0.0  | 11.0 | 1.0 |
| 21UR-82110 | 0.0   | 0.0  | 0.0   | 0.0  | 0.0  | 0.0 |
| 21UR-82120 | 0.0   | 0.3  | 0.0   | 0.0  | 0.0  | 0.0 |
| 21UR-82130 | 1.0   | 0.0  | 0.0   | 0.0  | 0.0  | 0.0 |
| 21UR-82140 | 0.0   | 0.0  | 0.0   | 0.0  | 0.0  | 0.0 |
| 21UR-82150 | 35.0  | 53.0 | 19.0  | 13.0 | 69.0 | 8.0 |
| 21UR-82160 | 10.0  | 1.0  | 1.0   | 6.0  | 1.0  | 0.0 |
| 21UR-82170 | 2.0   | 0.0  | 2.0   | 0.0  | 0.0  | 0.0 |
| 21UR-82180 | 4.0   | 0.0  | 6.0   | 0.0  | 9.0  | 1.0 |
| 21UR-82190 | 0.0   | 1.0  | 0.0   | 1.0  | 0.0  | 0.0 |
| 21UR-8220  | 0.0   | 0.0  | 0.0   | 0.0  | 0.0  | 0.0 |
| 21UR-82200 | 0.0   | 0.0  | 0.0   | 0.0  | 0.0  | 0.0 |
| 21UR-82210 | 0.0   | 0.0  | 0.0   | 0.0  | 0.0  | 0.0 |
| 21UR-82220 | 0.0   | 1.0  | 0.0   | 0.0  | 0.0  | 0.0 |
| 21UR-82230 | 8.0   | 0.0  | 12.0  | 1.0  | 3.0  | 0.0 |
| 21UR-82240 | 0.0   | 0.0  | 0.0   | 0.0  | 0.0  | 0.0 |
| 21UR-82250 | 0.0   | 0.0  | 1.0   | 0.0  | 0.0  | 0.0 |
| 21UR-82260 | 0.0   | 0.0  | 0.0   | 0.0  | 0.0  | 0.0 |
| 21UR-82270 | 262.0 | 5.0  | 195.0 | 61.0 | 4.0  | 0.0 |
| 21UR-82280 | 0.0   | 0.0  | 0.0   | 0.0  | 0.0  | 1.0 |
| 21UR-82290 | 0.0   | 2.0  | 0.0   | 1.0  | 1.0  | 1.0 |
| 21UR-8230  | 12.0  | 0.0  | 1.0   | 1.0  | 0.0  | 0.0 |
| 21UR-82300 | 0.0   | 0.0  | 0.0   | 0.0  | 0.0  | 0.0 |
| 21UR-82310 | 0.0   | 0.0  | 0.0   | 0.0  | 0.0  | 0.0 |
| 21UR-82320 | 0.0   | 0.0  | 0.0   | 0.0  | 0.0  | 0.0 |
| 21UR-82330 | 0.0   | 0.0  | 0.0   | 0.0  | 0.0  | 0.0 |
| 21UR-82340 | 2.0   | 2.0  | 0.0   | 0.0  | 1.0  | 0.0 |
| 21UR-82350 | 1.0   | 0.0  | 1.0   | 0.0  | 0.0  | 0.0 |
| 21UR-82360 | 0.0   | 0.0  | 0.0   | 0.0  | 0.0  | 0.0 |
| 21UR-82370 | 0.0   | 0.0  | 0.0   | 0.0  | 0.0  | 0.0 |
| 21UR-82380 | 0.0   | 1.0  | 0.0   | 0.0  | 0.0  | 0.0 |
| 21UR-82390 | 0.0   | 0.0  | 1.0   | 0.0  | 0.0  | 0.0 |
| 21UR-82400 | 6.0   | 9.0  | 6.0   | 0.0  | 10.0 | 1.0 |
| 21UR-82410 | 0.0   | 0.0  | 0.0   | 0.0  | 0.0  | 0.0 |
| 21UR-82420 | 0.0   | 0.0  | 0.0   | 0.0  | 0.0  | 2.0 |
| 21UR-82430 | 0.0   | 0.0  | 0.0   | 0.0  | 0.2  | 0.0 |
| 21UR-82440 | 1.0   | 0.0  | 0.0   | 0.0  | 0.0  | 0.0 |
| 21UR-82450 | 0.0   | 0.0  | 0.0   | 0.0  | 0.0  | 0.0 |
| 21UR-82460 | 4.0   | 0.0  | 0.0   | 0.0  | 1.0  | 0.0 |
| 21UR-82470 | 1.0   | 8.0  | 1.0   | 4.0  | 5.0  | 1.0 |
| 21UR-82480 | 0.0   | 0.0  | 0.0   | 0.0  | 0.0  | 0.0 |
| 21UR-82490 | 0.0   | 0.0  | 0.0   | 0.0  | 0.0  | 1.0 |
| 21UR-8250  | 1.0   | 11.0 | 6.0   | 1.0  | 4.0  | 1.0 |
| 21UR-82500 | 4.0   | 2.0  | 1.0   | 1.0  | 2.0  | 0.0 |
| 21UR-82510 | 0.0   | 1.0  | 0.0   | 0.0  | 0.0  | 0.0 |

|            |       |       |      |      |       |      |
|------------|-------|-------|------|------|-------|------|
| 21UR-82530 | 0.0   | 0.0   | 0.0  | 0.0  | 0.0   | 0.0  |
| 21UR-82540 | 0.0   | 0.0   | 0.0  | 0.0  | 0.0   | 0.0  |
| 21UR-82550 | 94.0  | 3.0   | 64.0 | 17.0 | 4.0   | 0.0  |
| 21UR-82560 | 0.0   | 0.0   | 0.0  | 0.0  | 2.0   | 0.0  |
| 21UR-82570 | 0.0   | 0.0   | 0.0  | 0.0  | 0.0   | 0.0  |
| 21UR-82580 | 1.0   | 0.0   | 0.0  | 0.0  | 1.0   | 0.0  |
| 21UR-82590 | 0.0   | 0.0   | 0.0  | 0.0  | 0.0   | 0.0  |
| 21UR-8260  | 0.0   | 0.0   | 0.0  | 1.0  | 4.0   | 0.0  |
| 21UR-82600 | 0.0   | 0.0   | 0.0  | 0.0  | 0.0   | 0.0  |
| 21UR-82610 | 0.0   | 0.0   | 0.0  | 0.0  | 0.0   | 0.0  |
| 21UR-82620 | 0.0   | 0.0   | 0.0  | 0.0  | 0.0   | 0.0  |
| 21UR-82630 | 0.0   | 0.0   | 2.0  | 0.0  | 0.0   | 0.0  |
| 21UR-82640 | 0.0   | 0.0   | 0.0  | 1.0  | 1.0   | 0.0  |
| 21UR-82650 | 0.0   | 0.0   | 0.0  | 0.0  | 1.0   | 0.0  |
| 21UR-82660 | 0.0   | 0.0   | 0.0  | 0.0  | 0.0   | 0.0  |
| 21UR-82670 | 0.0   | 0.0   | 0.0  | 0.0  | 0.0   | 0.0  |
| 21UR-82680 | 0.0   | 0.0   | 0.0  | 0.0  | 0.0   | 0.0  |
| 21UR-82690 | 1.0   | 0.0   | 0.0  | 0.0  | 0.0   | 0.0  |
| 21UR-8270  | 0.0   | 10.3  | 1.0  | 0.0  | 15.0  | 2.3  |
| 21UR-82700 | 0.0   | 0.0   | 1.0  | 0.0  | 0.0   | 0.0  |
| 21UR-82710 | 1.0   | 0.0   | 0.0  | 1.0  | 0.0   | 0.0  |
| 21UR-82720 | 0.0   | 0.0   | 0.0  | 0.0  | 0.0   | 0.0  |
| 21UR-82730 | 1.0   | 0.0   | 0.0  | 1.0  | 0.0   | 0.0  |
| 21UR-82740 | 0.0   | 0.0   | 0.0  | 0.0  | 0.0   | 0.0  |
| 21UR-82750 | 0.0   | 0.0   | 0.0  | 0.0  | 0.0   | 0.0  |
| 21UR-82760 | 183.0 | 238.5 | 96.0 | 89.0 | 118.0 | 18.0 |
| 21UR-82770 | 4.0   | 0.0   | 0.0  | 0.0  | 0.0   | 0.0  |
| 21UR-82780 | 3.0   | 0.0   | 0.0  | 0.0  | 0.0   | 0.0  |
| 21UR-82790 | 0.0   | 0.0   | 0.0  | 0.0  | 0.0   | 0.0  |
| 21UR-8280  | 4.0   | 0.0   | 4.0  | 0.0  | 0.0   | 0.0  |
| 21UR-82800 | 5.0   | 2.0   | 2.0  | 1.0  | 0.0   | 0.0  |
| 21UR-82810 | 1.0   | 0.0   | 0.0  | 0.0  | 0.0   | 0.0  |
| 21UR-82820 | 5.0   | 0.0   | 2.0  | 0.0  | 1.0   | 0.0  |
| 21UR-82830 | 0.0   | 0.0   | 1.0  | 0.0  | 2.0   | 0.0  |
| 21UR-82840 | 0.0   | 0.2   | 0.0  | 0.0  | 6.0   | 0.0  |
| 21UR-82850 | 1.0   | 2.0   | 0.0  | 6.0  | 29.0  | 1.0  |
| 21UR-82860 | 0.0   | 0.0   | 0.0  | 0.0  | 0.0   | 0.0  |
| 21UR-82870 | 1.0   | 0.0   | 0.0  | 0.0  | 0.0   | 0.0  |
| 21UR-82880 | 0.0   | 0.0   | 0.0  | 0.0  | 0.0   | 0.0  |
| 21UR-82890 | 1.0   | 0.0   | 0.0  | 0.0  | 0.0   | 0.0  |
| 21UR-8290  | 0.0   | 2.0   | 0.0  | 0.0  | 0.0   | 0.0  |
| 21UR-82910 | 0.0   | 0.0   | 0.0  | 0.0  | 0.0   | 0.0  |
| 21UR-82920 | 0.0   | 0.0   | 0.0  | 0.0  | 0.0   | 0.0  |
| 21UR-82930 | 0.0   | 0.0   | 0.0  | 0.0  | 0.0   | 0.0  |
| 21UR-82940 | 0.0   | 0.0   | 0.0  | 0.0  | 0.0   | 0.0  |
| 21UR-82950 | 1.0   | 4.0   | 4.0  | 4.0  | 1.0   | 0.0  |
| 21UR-82960 | 0.0   | 4.0   | 0.0  | 0.0  | 6.0   | 0.0  |
| 21UR-82970 | 0.0   | 1.0   | 1.0  | 0.0  | 0.0   | 0.0  |
| 21UR-82980 | 0.0   | 0.0   | 0.0  | 0.0  | 0.0   | 0.0  |
| 21UR-82990 | 0.0   | 0.0   | 1.0  | 0.0  | 0.0   | 0.0  |
| 21UR-830   | 87.0  | 1.0   | 46.0 | 17.0 | 27.0  | 0.0  |

|            |      |      |      |      |      |     |
|------------|------|------|------|------|------|-----|
| 21UR-8300  | 1.0  | 0.0  | 1.0  | 0.0  | 1.0  | 0.0 |
| 21UR-83000 | 0.0  | 0.1  | 0.0  | 0.0  | 0.0  | 0.0 |
| 21UR-83010 | 0.0  | 0.0  | 0.0  | 0.0  | 0.0  | 0.0 |
| 21UR-83020 | 10.0 | 15.0 | 13.0 | 1.0  | 17.0 | 1.0 |
| 21UR-83030 | 0.0  | 1.0  | 0.0  | 0.0  | 0.0  | 0.0 |
| 21UR-83040 | 2.0  | 2.0  | 0.0  | 3.0  | 1.0  | 1.0 |
| 21UR-83050 | 0.0  | 0.0  | 0.0  | 0.0  | 0.0  | 0.0 |
| 21UR-83060 | 0.0  | 0.0  | 0.0  | 0.0  | 0.0  | 0.0 |
| 21UR-83070 | 0.0  | 0.0  | 0.0  | 0.0  | 0.0  | 0.0 |
| 21UR-83080 | 1.0  | 1.0  | 0.0  | 0.0  | 0.0  | 0.0 |
| 21UR-83090 | 0.5  | 1.0  | 4.0  | 0.0  | 0.1  | 0.0 |
| 21UR-8310  | 0.0  | 0.0  | 0.0  | 0.0  | 0.0  | 0.0 |
| 21UR-83100 | 32.0 | 37.0 | 41.0 | 15.0 | 14.0 | 2.0 |
| 21UR-83110 | 0.0  | 0.0  | 0.0  | 0.0  | 0.0  | 0.0 |
| 21UR-83120 | 0.0  | 0.0  | 0.0  | 0.0  | 0.0  | 0.0 |
| 21UR-83130 | 0.0  | 0.0  | 0.0  | 0.0  | 0.0  | 0.0 |
| 21UR-83140 | 0.0  | 1.0  | 0.0  | 0.0  | 1.0  | 0.0 |
| 21UR-83150 | 0.0  | 0.0  | 0.0  | 0.0  | 0.0  | 0.0 |
| 21UR-83170 | 0.0  | 0.0  | 0.0  | 0.0  | 0.0  | 0.0 |
| 21UR-83180 | 0.0  | 0.0  | 0.0  | 0.0  | 0.0  | 0.0 |
| 21UR-83190 | 0.0  | 0.0  | 0.0  | 0.0  | 0.0  | 0.0 |
| 21UR-8320  | 3.0  | 3.0  | 4.0  | 1.0  | 0.0  | 0.0 |
| 21UR-83200 | 1.0  | 1.0  | 1.0  | 0.0  | 2.0  | 0.0 |
| 21UR-83220 | 1.0  | 0.0  | 0.0  | 0.0  | 1.0  | 0.0 |
| 21UR-83230 | 0.0  | 2.0  | 0.0  | 0.0  | 2.0  | 0.0 |
| 21UR-83240 | 1.0  | 0.0  | 1.0  | 0.0  | 0.0  | 0.0 |
| 21UR-83250 | 0.0  | 0.0  | 0.0  | 0.0  | 0.0  | 0.0 |
| 21UR-83260 | 0.0  | 0.0  | 4.0  | 0.0  | 0.0  | 0.0 |
| 21UR-83270 | 0.0  | 0.0  | 0.0  | 0.0  | 0.0  | 0.0 |
| 21UR-83280 | 0.0  | 1.0  | 3.0  | 0.0  | 15.0 | 0.0 |
| 21UR-83290 | 1.0  | 4.0  | 2.0  | 1.0  | 9.0  | 0.0 |
| 21UR-8330  | 10.0 | 0.0  | 8.0  | 4.0  | 1.0  | 0.0 |
| 21UR-83300 | 7.0  | 1.0  | 9.0  | 5.0  | 12.0 | 0.0 |
| 21UR-83310 | 0.0  | 1.0  | 0.0  | 0.0  | 0.0  | 0.0 |
| 21UR-83320 | 1.0  | 0.0  | 0.0  | 0.0  | 0.0  | 0.0 |
| 21UR-83330 | 1.0  | 0.0  | 1.0  | 0.0  | 0.0  | 0.0 |
| 21UR-83340 | 0.0  | 0.2  | 0.0  | 0.0  | 0.0  | 0.0 |
| 21UR-83350 | 0.0  | 0.0  | 0.0  | 0.0  | 0.0  | 0.0 |
| 21UR-83360 | 0.0  | 4.0  | 0.0  | 0.0  | 0.0  | 0.0 |
| 21UR-83370 | 0.0  | 0.0  | 0.0  | 0.0  | 0.0  | 0.0 |
| 21UR-83380 | 0.0  | 1.0  | 2.0  | 0.0  | 0.0  | 0.0 |
| 21UR-83390 | 0.0  | 0.0  | 0.0  | 0.0  | 0.0  | 0.0 |
| 21UR-8340  | 9.0  | 4.0  | 7.0  | 4.0  | 14.0 | 3.0 |
| 21UR-83400 | 0.0  | 0.0  | 0.0  | 0.0  | 5.0  | 0.0 |
| 21UR-83410 | 1.0  | 2.0  | 0.0  | 0.0  | 0.0  | 0.0 |
| 21UR-83420 | 0.0  | 0.0  | 0.0  | 0.0  | 0.0  | 0.0 |
| 21UR-83430 | 0.0  | 0.0  | 0.0  | 0.0  | 0.0  | 0.0 |
| 21UR-83440 | 0.0  | 0.0  | 0.0  | 0.0  | 0.0  | 0.0 |
| 21UR-83450 | 0.0  | 1.0  | 0.0  | 0.0  | 1.0  | 0.0 |
| 21UR-83460 | 8.0  | 0.0  | 1.0  | 0.0  | 0.0  | 1.0 |
| 21UR-83470 | 0.0  | 0.0  | 1.0  | 0.0  | 0.0  | 0.0 |

|            |      |     |      |      |      |     |
|------------|------|-----|------|------|------|-----|
| 21UR-83480 | 0.0  | 0.0 | 0.0  | 0.0  | 1.0  | 0.0 |
| 21UR-83490 | 4.0  | 0.0 | 3.0  | 1.0  | 1.0  | 0.0 |
| 21UR-8350  | 0.0  | 5.0 | 1.0  | 0.0  | 3.0  | 0.3 |
| 21UR-83500 | 0.0  | 0.0 | 0.0  | 0.0  | 0.0  | 0.0 |
| 21UR-83510 | 1.0  | 0.0 | 0.0  | 0.0  | 0.0  | 0.0 |
| 21UR-83520 | 0.0  | 0.0 | 0.0  | 0.0  | 0.0  | 0.0 |
| 21UR-83530 | 0.0  | 0.0 | 0.0  | 0.0  | 3.0  | 0.0 |
| 21UR-83540 | 0.0  | 2.0 | 0.0  | 0.0  | 0.0  | 1.0 |
| 21UR-83560 | 1.0  | 1.0 | 4.0  | 0.0  | 1.0  | 0.0 |
| 21UR-83570 | 1.0  | 3.0 | 1.0  | 0.0  | 6.0  | 0.0 |
| 21UR-83580 | 0.0  | 0.0 | 0.0  | 0.0  | 0.0  | 0.0 |
| 21UR-83590 | 0.0  | 3.0 | 3.0  | 0.0  | 6.0  | 1.0 |
| 21UR-8360  | 0.0  | 0.0 | 0.0  | 0.0  | 0.0  | 0.1 |
| 21UR-83600 | 1.0  | 0.0 | 0.0  | 0.0  | 0.0  | 0.0 |
| 21UR-83610 | 0.0  | 0.0 | 0.0  | 0.0  | 0.0  | 0.0 |
| 21UR-83620 | 0.0  | 0.0 | 0.0  | 0.0  | 0.0  | 0.0 |
| 21UR-83630 | 1.0  | 0.0 | 0.0  | 0.0  | 0.0  | 1.1 |
| 21UR-83640 | 0.0  | 1.0 | 0.0  | 0.0  | 0.0  | 0.0 |
| 21UR-83650 | 1.0  | 4.0 | 5.0  | 0.0  | 10.7 | 0.0 |
| 21UR-83660 | 6.0  | 1.0 | 10.0 | 1.0  | 0.0  | 0.0 |
| 21UR-83670 | 0.0  | 0.0 | 0.0  | 0.0  | 0.0  | 0.0 |
| 21UR-83680 | 0.0  | 2.0 | 0.0  | 0.0  | 3.0  | 2.0 |
| 21UR-83690 | 0.0  | 0.0 | 0.0  | 0.0  | 0.3  | 0.0 |
| 21UR-8370  | 10.0 | 8.0 | 10.0 | 1.0  | 10.0 | 1.0 |
| 21UR-83700 | 0.0  | 0.0 | 0.0  | 0.0  | 0.0  | 0.0 |
| 21UR-83710 | 0.0  | 0.0 | 0.0  | 0.0  | 0.0  | 0.0 |
| 21UR-83720 | 0.0  | 0.3 | 0.0  | 0.0  | 0.0  | 0.0 |
| 21UR-83730 | 0.0  | 0.0 | 0.0  | 0.0  | 0.0  | 0.0 |
| 21UR-83740 | 0.0  | 0.0 | 0.0  | 0.0  | 0.0  | 0.0 |
| 21UR-83750 | 0.0  | 0.0 | 0.0  | 0.0  | 0.0  | 0.0 |
| 21UR-83760 | 26.0 | 0.0 | 17.0 | 12.0 | 8.0  | 0.0 |
| 21UR-83770 | 0.0  | 0.0 | 0.0  | 0.0  | 0.0  | 0.0 |
| 21UR-83780 | 6.0  | 8.0 | 6.0  | 4.0  | 16.0 | 0.0 |
| 21UR-83790 | 0.0  | 0.0 | 0.0  | 0.0  | 0.0  | 0.0 |
| 21UR-8380  | 4.0  | 2.0 | 2.0  | 1.0  | 6.0  | 0.0 |
| 21UR-83800 | 0.0  | 0.0 | 0.0  | 0.0  | 0.0  | 0.0 |
| 21UR-83810 | 0.0  | 0.0 | 0.0  | 0.0  | 0.0  | 0.0 |
| 21UR-83820 | 0.0  | 0.1 | 0.0  | 0.0  | 0.0  | 0.5 |
| 21UR-83830 | 0.0  | 0.0 | 0.0  | 0.0  | 0.0  | 0.0 |
| 21UR-83840 | 0.0  | 0.0 | 0.0  | 0.0  | 0.0  | 0.0 |
| 21UR-83850 | 0.0  | 0.0 | 0.0  | 0.0  | 0.0  | 0.0 |
| 21UR-83860 | 0.0  | 0.0 | 0.0  | 0.0  | 1.0  | 0.0 |
| 21UR-83870 | 5.0  | 2.0 | 9.0  | 1.0  | 5.0  | 1.0 |
| 21UR-83880 | 0.0  | 0.0 | 0.0  | 0.0  | 0.0  | 0.0 |
| 21UR-8390  | 1.0  | 0.0 | 0.0  | 0.0  | 0.0  | 0.0 |
| 21UR-83900 | 0.0  | 9.0 | 1.0  | 0.0  | 0.0  | 0.0 |
| 21UR-83910 | 1.0  | 3.0 | 4.0  | 0.0  | 1.0  | 0.0 |
| 21UR-83920 | 0.0  | 0.0 | 1.0  | 0.0  | 0.0  | 0.0 |
| 21UR-83930 | 0.0  | 0.0 | 0.0  | 0.0  | 0.0  | 0.0 |
| 21UR-83940 | 1.0  | 0.0 | 0.0  | 0.0  | 0.0  | 0.0 |
| 21UR-83950 | 0.0  | 1.0 | 0.0  | 0.0  | 1.0  | 1.0 |

|            |       |      |       |       |       |     |
|------------|-------|------|-------|-------|-------|-----|
| 21UR-83960 | 0.0   | 0.0  | 0.0   | 0.0   | 0.0   | 0.0 |
| 21UR-83970 | 8.0   | 1.0  | 6.0   | 6.0   | 6.0   | 0.0 |
| 21UR-83980 | 0.0   | 0.5  | 0.0   | 0.0   | 0.0   | 0.0 |
| 21UR-83990 | 0.0   | 3.0  | 0.0   | 1.0   | 4.0   | 0.0 |
| 21UR-840   | 0.0   | 1.0  | 0.0   | 0.0   | 0.0   | 0.0 |
| 21UR-8400  | 0.0   | 0.0  | 1.0   | 0.0   | 0.0   | 0.0 |
| 21UR-84000 | 8.0   | 0.0  | 3.0   | 0.0   | 4.0   | 0.0 |
| 21UR-84010 | 0.0   | 1.0  | 4.0   | 1.0   | 1.0   | 0.0 |
| 21UR-84020 | 10.5  | 3.5  | 9.0   | 1.0   | 0.0   | 0.0 |
| 21UR-84030 | 64.0  | 26.0 | 50.5  | 17.0  | 12.0  | 6.0 |
| 21UR-84040 | 0.0   | 0.0  | 0.0   | 0.0   | 0.0   | 0.0 |
| 21UR-84050 | 0.0   | 0.0  | 0.0   | 0.0   | 0.0   | 0.0 |
| 21UR-84070 | 0.0   | 0.0  | 0.0   | 0.0   | 0.0   | 0.0 |
| 21UR-84080 | 0.0   | 0.0  | 0.0   | 0.0   | 0.0   | 0.0 |
| 21UR-84090 | 0.0   | 0.0  | 0.0   | 0.0   | 0.0   | 0.0 |
| 21UR-8410  | 314.8 | 74.0 | 304.0 | 180.5 | 161.5 | 6.0 |
| 21UR-84100 | 0.0   | 0.0  | 0.0   | 0.0   | 0.0   | 0.0 |
| 21UR-84110 | 0.0   | 1.0  | 0.0   | 0.0   | 0.0   | 0.0 |
| 21UR-84120 | 0.0   | 0.0  | 0.0   | 0.0   | 0.0   | 0.0 |
| 21UR-84130 | 2.0   | 3.0  | 5.0   | 4.0   | 14.0  | 0.0 |
| 21UR-84140 | 0.0   | 5.0  | 0.0   | 1.0   | 0.1   | 0.0 |
| 21UR-84150 | 1.0   | 1.0  | 1.0   | 0.0   | 0.0   | 1.0 |
| 21UR-84160 | 0.0   | 0.0  | 0.0   | 0.0   | 0.0   | 0.0 |
| 21UR-84170 | 0.0   | 1.0  | 0.0   | 1.0   | 0.0   | 0.0 |
| 21UR-84190 | 2.0   | 0.0  | 3.0   | 2.0   | 4.0   | 0.0 |
| 21UR-8420  | 6.0   | 0.0  | 1.0   | 0.0   | 0.0   | 0.0 |
| 21UR-84200 | 0.0   | 0.0  | 0.0   | 0.0   | 0.0   | 0.0 |
| 21UR-84210 | 3.0   | 0.0  | 0.0   | 0.0   | 1.0   | 0.0 |
| 21UR-84220 | 4.0   | 0.0  | 0.0   | 1.0   | 0.0   | 0.0 |
| 21UR-84230 | 0.0   | 0.0  | 0.0   | 0.0   | 0.0   | 0.0 |
| 21UR-84240 | 0.0   | 0.0  | 0.0   | 0.0   | 1.0   | 0.0 |
| 21UR-84250 | 15.2  | 32.5 | 23.3  | 22.0  | 15.8  | 5.0 |
| 21UR-84270 | 4.0   | 0.0  | 8.0   | 1.0   | 0.0   | 0.0 |
| 21UR-84280 | 0.0   | 0.0  | 1.0   | 0.0   | 4.0   | 0.0 |
| 21UR-84290 | 0.0   | 0.0  | 0.0   | 0.0   | 0.0   | 0.0 |
| 21UR-8430  | 0.0   | 0.0  | 0.0   | 0.0   | 0.0   | 0.0 |
| 21UR-84300 | 5.0   | 3.0  | 1.0   | 0.0   | 2.0   | 1.0 |
| 21UR-84320 | 0.0   | 0.0  | 0.0   | 0.0   | 0.0   | 0.0 |
| 21UR-84330 | 3.0   | 0.0  | 1.0   | 0.0   | 5.0   | 1.0 |
| 21UR-84340 | 0.0   | 0.0  | 0.0   | 0.0   | 0.1   | 0.0 |
| 21UR-84360 | 0.0   | 2.0  | 0.0   | 0.0   | 1.0   | 1.0 |
| 21UR-84370 | 0.0   | 0.0  | 8.0   | 1.0   | 0.0   | 1.0 |
| 21UR-84380 | 0.0   | 0.0  | 0.0   | 0.0   | 2.7   | 0.0 |
| 21UR-84390 | 0.0   | 0.0  | 0.0   | 0.0   | 0.0   | 0.0 |
| 21UR-8440  | 10.0  | 5.0  | 6.0   | 0.0   | 1.0   | 2.0 |
| 21UR-84400 | 0.0   | 0.0  | 0.0   | 0.0   | 0.0   | 0.0 |
| 21UR-84410 | 22.0  | 3.0  | 12.0  | 4.0   | 2.0   | 0.0 |
| 21UR-84420 | 6.0   | 0.0  | 6.0   | 0.0   | 1.0   | 0.0 |
| 21UR-84430 | 0.0   | 0.0  | 0.0   | 0.0   | 0.0   | 0.0 |
| 21UR-84440 | 0.0   | 1.0  | 1.0   | 0.0   | 1.0   | 0.0 |
| 21UR-84450 | 0.0   | 0.0  | 2.0   | 0.0   | 0.0   | 0.0 |



|            |       |      |       |       |      |      |
|------------|-------|------|-------|-------|------|------|
| 21UR-84460 | 0.0   | 0.0  | 0.0   | 0.0   | 0.0  | 0.0  |
| 21UR-84470 | 0.0   | 0.0  | 0.0   | 0.0   | 0.0  | 0.0  |
| 21UR-84480 | 14.0  | 0.0  | 13.0  | 8.0   | 5.0  | 0.0  |
| 21UR-84490 | 9.0   | 1.0  | 2.0   | 0.0   | 3.0  | 0.0  |
| 21UR-8450  | 297.0 | 6.0  | 113.0 | 112.0 | 1.0  | 1.0  |
| 21UR-84500 | 0.0   | 1.0  | 0.0   | 0.0   | 0.0  | 0.0  |
| 21UR-84510 | 0.0   | 0.0  | 1.0   | 0.0   | 0.0  | 0.0  |
| 21UR-84520 | 0.0   | 0.0  | 1.0   | 0.0   | 3.0  | 0.0  |
| 21UR-84530 | 0.0   | 0.0  | 0.0   | 0.0   | 1.0  | 0.0  |
| 21UR-84540 | 0.0   | 0.0  | 0.0   | 0.0   | 0.0  | 0.0  |
| 21UR-84550 | 0.0   | 1.0  | 1.0   | 0.0   | 1.0  | 0.0  |
| 21UR-84560 | 0.0   | 0.0  | 4.0   | 0.0   | 0.0  | 0.0  |
| 21UR-84570 | 0.0   | 0.0  | 0.0   | 0.0   | 0.0  | 0.0  |
| 21UR-84580 | 0.0   | 0.0  | 0.0   | 1.0   | 0.0  | 0.0  |
| 21UR-84590 | 0.0   | 0.0  | 0.0   | 0.0   | 0.0  | 0.0  |
| 21UR-8460  | 0.0   | 0.0  | 0.0   | 0.0   | 0.0  | 0.0  |
| 21UR-84600 | 0.0   | 0.0  | 0.0   | 0.0   | 0.0  | 0.0  |
| 21UR-84610 | 20.0  | 6.0  | 21.0  | 2.0   | 8.0  | 12.0 |
| 21UR-84630 | 21.0  | 12.0 | 15.0  | 3.0   | 23.0 | 6.0  |
| 21UR-84640 | 0.0   | 0.0  | 0.0   | 0.0   | 1.0  | 0.0  |
| 21UR-84650 | 0.0   | 0.0  | 0.0   | 0.0   | 0.0  | 0.0  |
| 21UR-84660 | 0.0   | 0.0  | 0.0   | 0.0   | 0.0  | 0.0  |
| 21UR-84670 | 0.0   | 0.0  | 0.0   | 0.0   | 0.0  | 0.0  |
| 21UR-84680 | 0.0   | 0.0  | 0.0   | 0.0   | 0.0  | 0.0  |
| 21UR-84690 | 0.0   | 0.0  | 0.0   | 0.0   | 0.0  | 0.0  |
| 21UR-8470  | 0.0   | 0.0  | 0.0   | 0.0   | 0.0  | 0.0  |
| 21UR-84700 | 0.0   | 0.0  | 0.0   | 0.0   | 0.0  | 0.0  |
| 21UR-84710 | 6.0   | 0.0  | 1.0   | 1.0   | 1.0  | 0.0  |
| 21UR-84720 | 0.0   | 0.0  | 0.0   | 0.0   | 0.0  | 0.0  |
| 21UR-84730 | 0.0   | 0.0  | 0.0   | 0.0   | 0.0  | 0.0  |
| 21UR-84740 | 0.0   | 3.0  | 4.0   | 0.0   | 8.0  | 0.0  |
| 21UR-84750 | 0.0   | 0.0  | 0.0   | 0.0   | 0.0  | 0.0  |
| 21UR-84760 | 3.0   | 2.0  | 2.0   | 0.0   | 0.0  | 0.0  |
| 21UR-84770 | 1.0   | 1.0  | 1.0   | 0.0   | 0.0  | 0.0  |
| 21UR-84780 | 0.0   | 0.0  | 1.0   | 0.0   | 0.0  | 0.0  |
| 21UR-84790 | 0.0   | 0.0  | 0.0   | 0.0   | 0.0  | 0.0  |
| 21UR-8480  | 0.0   | 0.0  | 0.0   | 0.0   | 1.0  | 0.0  |
| 21UR-84800 | 0.0   | 0.0  | 0.0   | 0.0   | 0.0  | 0.0  |
| 21UR-84810 | 0.0   | 0.0  | 0.0   | 0.0   | 1.0  | 0.0  |
| 21UR-84820 | 1.0   | 0.0  | 2.0   | 2.0   | 0.0  | 0.0  |
| 21UR-84830 | 54.0  | 70.0 | 74.0  | 38.0  | 98.0 | 12.0 |
| 21UR-84840 | 0.0   | 0.0  | 0.0   | 0.0   | 1.0  | 0.0  |
| 21UR-84850 | 0.0   | 0.0  | 4.0   | 0.0   | 0.0  | 0.0  |
| 21UR-84860 | 1.0   | 0.0  | 0.0   | 0.0   | 0.0  | 0.0  |
| 21UR-84870 | 0.0   | 1.0  | 0.0   | 0.0   | 1.0  | 0.0  |
| 21UR-84880 | 0.0   | 0.0  | 0.0   | 0.0   | 1.0  | 0.0  |
| 21UR-84890 | 0.0   | 0.0  | 0.0   | 0.0   | 0.0  | 0.0  |
| 21UR-8490  | 55.0  | 11.0 | 86.0  | 25.0  | 37.0 | 1.0  |
| 21UR-84900 | 0.0   | 0.0  | 0.0   | 0.0   | 0.0  | 0.0  |
| 21UR-84910 | 0.0   | 0.0  | 0.0   | 0.0   | 0.0  | 0.0  |
| 21UR-84920 | 0.0   | 0.0  | 0.0   | 0.0   | 0.0  | 0.0  |

|            |       |      |       |      |       |     |
|------------|-------|------|-------|------|-------|-----|
| 21UR-84930 | 0.0   | 0.0  | 0.0   | 0.0  | 0.0   | 0.0 |
| 21UR-84940 | 0.0   | 0.0  | 0.0   | 0.0  | 0.0   | 0.0 |
| 21UR-84950 | 0.0   | 1.0  | 0.0   | 0.0  | 0.0   | 0.0 |
| 21UR-84960 | 2.0   | 0.0  | 0.0   | 0.0  | 8.0   | 0.0 |
| 21UR-84970 | 7.0   | 0.0  | 4.0   | 1.0  | 1.0   | 0.0 |
| 21UR-84980 | 0.0   | 0.0  | 0.0   | 0.0  | 0.0   | 0.0 |
| 21UR-84990 | 0.0   | 1.0  | 0.0   | 0.0  | 0.0   | 0.0 |
| 21UR-850   | 18.0  | 28.0 | 6.0   | 10.0 | 109.0 | 0.0 |
| 21UR-8500  | 19.0  | 18.0 | 9.0   | 3.0  | 7.0   | 4.0 |
| 21UR-85000 | 0.0   | 0.0  | 0.0   | 0.0  | 1.0   | 0.0 |
| 21UR-85010 | 1.0   | 0.0  | 0.0   | 1.0  | 0.0   | 0.0 |
| 21UR-85030 | 0.0   | 0.0  | 0.0   | 0.0  | 0.0   | 0.0 |
| 21UR-85040 | 0.0   | 0.0  | 0.0   | 0.0  | 0.0   | 0.0 |
| 21UR-85050 | 1.0   | 0.0  | 1.0   | 0.0  | 0.0   | 0.0 |
| 21UR-85060 | 0.0   | 0.0  | 0.0   | 1.0  | 0.0   | 0.0 |
| 21UR-85070 | 0.0   | 0.0  | 0.0   | 0.0  | 0.0   | 0.0 |
| 21UR-85080 | 5.0   | 1.0  | 1.0   | 0.0  | 0.0   | 0.0 |
| 21UR-85090 | 0.0   | 0.0  | 0.0   | 0.0  | 0.0   | 0.0 |
| 21UR-8510  | 1.0   | 0.0  | 1.0   | 0.0  | 0.0   | 0.0 |
| 21UR-85100 | 2.0   | 0.0  | 3.0   | 0.0  | 0.0   | 0.0 |
| 21UR-85110 | 0.0   | 0.0  | 0.0   | 0.0  | 0.0   | 0.0 |
| 21UR-85120 | 0.0   | 0.0  | 0.0   | 0.0  | 0.0   | 0.0 |
| 21UR-85130 | 0.0   | 0.0  | 0.0   | 0.0  | 0.0   | 0.0 |
| 21UR-85140 | 0.0   | 0.0  | 0.0   | 0.0  | 0.0   | 0.0 |
| 21UR-85150 | 1.0   | 3.0  | 1.0   | 1.0  | 9.0   | 0.0 |
| 21UR-85160 | 0.0   | 0.0  | 0.0   | 0.0  | 0.0   | 0.0 |
| 21UR-85170 | 1.0   | 0.0  | 0.0   | 0.0  | 0.0   | 0.0 |
| 21UR-85180 | 4.0   | 0.0  | 1.0   | 0.0  | 0.0   | 0.0 |
| 21UR-85190 | 0.0   | 1.0  | 0.0   | 0.0  | 4.0   | 0.0 |
| 21UR-8520  | 23.0  | 7.0  | 7.0   | 6.0  | 22.3  | 0.0 |
| 21UR-85200 | 0.0   | 0.0  | 1.0   | 0.0  | 1.0   | 0.0 |
| 21UR-85210 | 0.0   | 0.0  | 0.0   | 0.0  | 0.0   | 0.0 |
| 21UR-85220 | 0.0   | 0.0  | 0.0   | 0.0  | 0.0   | 0.0 |
| 21UR-85230 | 0.0   | 0.0  | 0.0   | 0.0  | 0.0   | 0.0 |
| 21UR-85240 | 0.0   | 0.0  | 0.0   | 0.0  | 0.0   | 0.0 |
| 21UR-85250 | 0.0   | 0.5  | 0.0   | 0.0  | 0.0   | 0.0 |
| 21UR-85260 | 0.0   | 0.0  | 0.0   | 0.0  | 0.0   | 0.0 |
| 21UR-85270 | 0.0   | 0.0  | 1.0   | 0.0  | 0.0   | 0.0 |
| 21UR-85280 | 0.0   | 0.0  | 0.0   | 0.0  | 0.0   | 0.0 |
| 21UR-85290 | 20.5  | 2.0  | 19.0  | 1.0  | 15.0  | 2.0 |
| 21UR-8530  | 5.0   | 1.0  | 1.0   | 3.0  | 3.0   | 0.0 |
| 21UR-85300 | 14.0  | 0.0  | 5.0   | 5.0  | 0.0   | 0.0 |
| 21UR-85310 | 1.0   | 0.0  | 0.0   | 3.0  | 0.0   | 0.0 |
| 21UR-85320 | 159.0 | 9.0  | 128.0 | 60.5 | 47.5  | 1.0 |
| 21UR-85330 | 0.0   | 0.0  | 0.0   | 0.0  | 0.0   | 1.0 |
| 21UR-85340 | 10.0  | 0.0  | 10.0  | 1.0  | 0.0   | 0.0 |
| 21UR-85350 | 0.0   | 0.0  | 0.0   | 0.0  | 0.0   | 0.0 |
| 21UR-85360 | 18.0  | 23.0 | 7.0   | 0.0  | 17.0  | 1.0 |
| 21UR-85370 | 0.0   | 1.0  | 0.0   | 0.0  | 0.0   | 0.0 |
| 21UR-85380 | 0.0   | 1.0  | 4.0   | 0.0  | 0.0   | 0.0 |
| 21UR-85390 | 1.0   | 0.0  | 2.0   | 0.0  | 0.0   | 0.0 |

|            |       |      |       |       |      |     |
|------------|-------|------|-------|-------|------|-----|
| 21UR-8540  | 20.0  | 4.0  | 17.0  | 6.0   | 8.0  | 1.0 |
| 21UR-85400 | 0.0   | 0.0  | 0.0   | 0.0   | 0.0  | 0.0 |
| 21UR-85410 | 0.0   | 0.0  | 0.0   | 0.0   | 0.0  | 0.0 |
| 21UR-85420 | 6.0   | 0.0  | 6.0   | 6.0   | 1.0  | 1.0 |
| 21UR-85430 | 0.0   | 0.0  | 0.0   | 0.0   | 0.0  | 0.0 |
| 21UR-85440 | 18.0  | 1.0  | 10.0  | 1.0   | 1.0  | 0.0 |
| 21UR-85450 | 0.0   | 0.0  | 0.0   | 0.0   | 0.0  | 0.0 |
| 21UR-85470 | 0.0   | 0.0  | 0.0   | 0.0   | 0.0  | 0.0 |
| 21UR-85480 | 1.0   | 3.0  | 1.0   | 0.0   | 0.0  | 0.0 |
| 21UR-85490 | 0.0   | 0.0  | 0.0   | 0.0   | 0.0  | 0.0 |
| 21UR-8550  | 0.0   | 1.0  | 0.0   | 0.0   | 0.0  | 0.0 |
| 21UR-85500 | 0.0   | 0.0  | 0.0   | 0.0   | 0.0  | 0.0 |
| 21UR-85510 | 0.0   | 0.0  | 0.0   | 0.0   | 0.0  | 0.0 |
| 21UR-85520 | 0.0   | 0.0  | 0.0   | 0.0   | 0.0  | 0.0 |
| 21UR-85530 | 0.0   | 0.0  | 0.0   | 0.0   | 0.0  | 0.0 |
| 21UR-85540 | 0.0   | 0.0  | 0.0   | 0.0   | 0.0  | 0.0 |
| 21UR-85550 | 0.0   | 0.0  | 0.0   | 0.0   | 0.2  | 0.0 |
| 21UR-85560 | 699.5 | 67.1 | 613.0 | 313.0 | 43.0 | 6.0 |
| 21UR-85570 | 0.0   | 0.0  | 0.0   | 0.0   | 0.0  | 0.0 |
| 21UR-85580 | 0.0   | 0.0  | 0.0   | 0.0   | 0.0  | 0.0 |
| 21UR-85590 | 0.0   | 0.0  | 0.0   | 0.0   | 0.0  | 0.0 |
| 21UR-8560  | 1.0   | 0.0  | 0.0   | 0.0   | 0.0  | 0.0 |
| 21UR-85600 | 0.0   | 0.0  | 0.0   | 0.0   | 0.0  | 0.0 |
| 21UR-85610 | 6.0   | 2.0  | 12.0  | 0.0   | 1.0  | 0.0 |
| 21UR-85620 | 0.0   | 0.0  | 0.0   | 0.0   | 1.0  | 1.0 |
| 21UR-85630 | 0.0   | 0.0  | 0.0   | 0.0   | 0.0  | 0.0 |
| 21UR-85640 | 9.0   | 0.0  | 9.0   | 1.0   | 1.0  | 0.0 |
| 21UR-85650 | 0.0   | 0.0  | 0.0   | 0.0   | 0.0  | 0.0 |
| 21UR-85660 | 0.0   | 0.0  | 0.0   | 0.0   | 0.0  | 0.0 |
| 21UR-85670 | 12.0  | 8.0  | 17.0  | 6.0   | 0.0  | 0.3 |
| 21UR-85680 | 0.0   | 0.0  | 0.0   | 0.0   | 0.0  | 0.0 |
| 21UR-85690 | 0.0   | 0.0  | 0.0   | 0.0   | 0.0  | 0.0 |
| 21UR-8570  | 0.0   | 0.0  | 0.0   | 0.0   | 0.0  | 1.0 |
| 21UR-85700 | 0.0   | 0.0  | 0.0   | 0.0   | 0.0  | 0.0 |
| 21UR-85710 | 1.0   | 0.0  | 1.0   | 0.0   | 0.0  | 0.0 |
| 21UR-85720 | 9.0   | 1.0  | 3.0   | 5.0   | 2.0  | 1.0 |
| 21UR-85730 | 0.0   | 0.0  | 0.0   | 0.0   | 0.0  | 0.2 |
| 21UR-85740 | 0.0   | 0.0  | 0.0   | 0.0   | 0.0  | 0.0 |
| 21UR-85750 | 16.0  | 4.2  | 21.0  | 0.0   | 10.0 | 0.0 |
| 21UR-85760 | 5.0   | 3.0  | 9.0   | 0.0   | 5.0  | 0.0 |
| 21UR-85770 | 0.0   | 1.0  | 0.0   | 0.0   | 0.0  | 0.0 |
| 21UR-85780 | 2.0   | 10.0 | 2.0   | 1.0   | 0.0  | 2.0 |
| 21UR-85790 | 0.0   | 0.0  | 0.0   | 0.0   | 0.0  | 0.0 |
| 21UR-8580  | 0.0   | 0.0  | 1.0   | 0.0   | 0.0  | 0.0 |
| 21UR-85800 | 4.0   | 0.0  | 5.0   | 0.0   | 0.0  | 0.0 |
| 21UR-85810 | 0.0   | 0.0  | 0.0   | 0.0   | 0.0  | 0.0 |
| 21UR-85820 | 0.0   | 1.0  | 0.0   | 0.0   | 0.0  | 0.0 |
| 21UR-85830 | 0.0   | 1.0  | 0.0   | 0.0   | 0.0  | 0.0 |
| 21UR-85840 | 0.0   | 0.0  | 2.0   | 0.0   | 0.0  | 0.0 |
| 21UR-85850 | 0.0   | 0.0  | 0.0   | 0.0   | 0.0  | 0.0 |
| 21UR-85860 | 0.0   | 0.0  | 0.0   | 0.0   | 0.0  | 0.0 |

|            |      |      |      |      |      |     |
|------------|------|------|------|------|------|-----|
| 21UR-85870 | 0.0  | 0.0  | 0.0  | 0.0  | 0.0  | 0.0 |
| 21UR-85880 | 0.0  | 0.0  | 0.0  | 0.0  | 0.0  | 0.0 |
| 21UR-85890 | 0.0  | 0.0  | 1.0  | 0.0  | 0.0  | 0.0 |
| 21UR-8590  | 4.0  | 0.5  | 0.0  | 0.0  | 0.0  | 0.1 |
| 21UR-85900 | 0.0  | 0.0  | 0.0  | 0.0  | 0.0  | 0.0 |
| 21UR-85910 | 0.0  | 0.0  | 4.0  | 0.0  | 0.0  | 0.0 |
| 21UR-85920 | 0.0  | 0.0  | 0.0  | 0.0  | 0.0  | 0.0 |
| 21UR-85930 | 0.0  | 0.0  | 0.0  | 0.0  | 0.0  | 0.0 |
| 21UR-85940 | 0.0  | 0.0  | 0.0  | 0.0  | 0.0  | 0.0 |
| 21UR-85950 | 0.0  | 0.0  | 0.0  | 0.0  | 0.0  | 0.0 |
| 21UR-85960 | 6.0  | 0.0  | 8.0  | 1.0  | 1.0  | 0.0 |
| 21UR-85970 | 12.0 | 0.0  | 4.0  | 0.0  | 0.0  | 0.0 |
| 21UR-85980 | 0.0  | 0.0  | 1.0  | 0.0  | 0.0  | 0.0 |
| 21UR-85990 | 4.0  | 0.0  | 4.0  | 0.0  | 2.1  | 0.0 |
| 21UR-860   | 0.0  | 1.0  | 0.0  | 0.0  | 0.0  | 0.0 |
| 21UR-8600  | 4.0  | 0.0  | 0.0  | 0.0  | 0.0  | 0.0 |
| 21UR-86000 | 0.0  | 0.0  | 0.0  | 0.0  | 0.0  | 0.0 |
| 21UR-86010 | 1.0  | 1.0  | 1.0  | 0.0  | 0.0  | 0.0 |
| 21UR-86020 | 2.0  | 0.0  | 0.0  | 0.0  | 1.0  | 0.0 |
| 21UR-86030 | 1.0  | 0.0  | 0.0  | 0.0  | 0.0  | 0.0 |
| 21UR-86040 | 0.0  | 0.0  | 0.0  | 0.0  | 0.0  | 0.0 |
| 21UR-86050 | 1.0  | 6.0  | 1.0  | 1.0  | 0.0  | 0.0 |
| 21UR-86060 | 0.0  | 0.0  | 0.0  | 1.0  | 3.0  | 0.0 |
| 21UR-86070 | 0.0  | 0.0  | 0.0  | 0.0  | 0.0  | 0.0 |
| 21UR-86080 | 0.0  | 0.0  | 0.0  | 0.0  | 0.0  | 0.0 |
| 21UR-86090 | 0.0  | 0.0  | 0.0  | 0.0  | 0.0  | 0.0 |
| 21UR-8610  | 8.0  | 4.0  | 17.0 | 1.0  | 5.0  | 0.0 |
| 21UR-86100 | 0.0  | 1.0  | 0.0  | 0.0  | 0.0  | 0.0 |
| 21UR-86110 | 1.0  | 0.0  | 0.0  | 0.0  | 0.2  | 0.0 |
| 21UR-86120 | 0.0  | 0.0  | 0.0  | 0.0  | 0.0  | 0.0 |
| 21UR-86130 | 6.0  | 0.0  | 9.0  | 0.0  | 0.0  | 0.0 |
| 21UR-86140 | 0.0  | 0.0  | 0.0  | 0.0  | 0.0  | 0.0 |
| 21UR-86150 | 0.0  | 0.0  | 0.0  | 0.0  | 0.0  | 1.0 |
| 21UR-86160 | 0.0  | 0.0  | 0.0  | 0.0  | 0.0  | 0.0 |
| 21UR-86170 | 0.0  | 0.0  | 0.0  | 0.0  | 0.0  | 0.0 |
| 21UR-86180 | 0.0  | 0.0  | 0.0  | 0.0  | 0.0  | 0.0 |
| 21UR-86190 | 12.0 | 11.0 | 23.0 | 0.0  | 13.0 | 0.0 |
| 21UR-8620  | 4.0  | 0.0  | 0.0  | 0.0  | 0.0  | 0.0 |
| 21UR-86200 | 0.0  | 1.0  | 0.0  | 0.0  | 0.0  | 0.0 |
| 21UR-86210 | 0.0  | 0.0  | 1.0  | 0.0  | 1.0  | 0.0 |
| 21UR-86220 | 0.0  | 1.0  | 0.0  | 0.0  | 0.0  | 0.0 |
| 21UR-86230 | 1.0  | 1.0  | 4.0  | 4.0  | 0.0  | 0.0 |
| 21UR-86240 | 0.0  | 0.0  | 0.0  | 0.0  | 0.0  | 0.0 |
| 21UR-86250 | 22.0 | 13.0 | 16.0 | 9.0  | 1.0  | 0.0 |
| 21UR-86260 | 0.0  | 0.0  | 1.0  | 0.0  | 1.0  | 0.0 |
| 21UR-86270 | 5.0  | 0.5  | 6.0  | 7.0  | 6.0  | 0.0 |
| 21UR-86280 | 0.0  | 0.0  | 0.0  | 0.0  | 0.0  | 0.0 |
| 21UR-86290 | 13.0 | 4.0  | 9.0  | 11.0 | 13.0 | 1.0 |
| 21UR-8630  | 0.0  | 1.0  | 0.0  | 0.0  | 0.0  | 0.0 |
| 21UR-86300 | 6.0  | 6.0  | 1.0  | 0.0  | 4.0  | 0.0 |
| 21UR-86310 | 0.0  | 0.0  | 0.0  | 0.0  | 0.0  | 0.0 |

|            |       |      |       |       |       |      |
|------------|-------|------|-------|-------|-------|------|
| 21UR-86320 | 0.0   | 0.0  | 0.0   | 0.0   | 0.0   | 0.0  |
| 21UR-86330 | 0.0   | 0.0  | 0.0   | 0.0   | 0.0   | 0.0  |
| 21UR-86340 | 1.0   | 0.0  | 1.0   | 0.0   | 0.0   | 0.0  |
| 21UR-86350 | 0.0   | 0.0  | 0.0   | 0.0   | 0.0   | 0.0  |
| 21UR-86360 | 0.0   | 1.0  | 0.0   | 0.0   | 1.0   | 0.0  |
| 21UR-86370 | 0.0   | 0.0  | 0.0   | 1.0   | 0.0   | 0.0  |
| 21UR-86380 | 16.0  | 5.0  | 10.0  | 1.0   | 3.0   | 1.0  |
| 21UR-86390 | 0.0   | 0.0  | 0.0   | 0.0   | 0.0   | 0.0  |
| 21UR-8640  | 738.5 | 85.1 | 393.5 | 343.0 | 71.0  | 17.0 |
| 21UR-86400 | 0.0   | 1.0  | 0.0   | 0.0   | 0.0   | 0.0  |
| 21UR-86410 | 0.0   | 0.0  | 0.0   | 0.0   | 0.0   | 0.0  |
| 21UR-86420 | 21.0  | 2.0  | 27.0  | 5.0   | 4.0   | 0.0  |
| 21UR-86430 | 0.0   | 0.0  | 0.0   | 0.0   | 0.0   | 0.0  |
| 21UR-86440 | 41.0  | 1.0  | 32.0  | 6.0   | 0.0   | 0.0  |
| 21UR-86450 | 0.0   | 0.0  | 1.0   | 1.0   | 0.0   | 0.0  |
| 21UR-86460 | 1.0   | 1.0  | 0.0   | 0.0   | 0.0   | 0.0  |
| 21UR-86470 | 0.0   | 0.0  | 0.0   | 0.0   | 0.0   | 0.0  |
| 21UR-86480 | 0.0   | 0.0  | 1.0   | 0.0   | 0.0   | 0.0  |
| 21UR-86490 | 1.0   | 1.0  | 0.0   | 0.0   | 0.0   | 0.0  |
| 21UR-8650  | 16.0  | 13.0 | 7.0   | 4.0   | 2.0   | 0.0  |
| 21UR-86500 | 0.0   | 0.0  | 0.0   | 0.0   | 0.0   | 0.0  |
| 21UR-86520 | 0.0   | 2.0  | 0.0   | 2.0   | 1.0   | 0.0  |
| 21UR-86530 | 0.0   | 0.0  | 1.0   | 0.0   | 0.0   | 0.0  |
| 21UR-86540 | 0.0   | 0.0  | 1.0   | 0.0   | 0.0   | 0.0  |
| 21UR-86550 | 0.0   | 0.0  | 0.0   | 0.0   | 0.0   | 0.0  |
| 21UR-86560 | 0.0   | 0.0  | 0.0   | 0.0   | 0.0   | 0.0  |
| 21UR-86570 | 1.0   | 0.0  | 0.0   | 0.0   | 0.0   | 0.0  |
| 21UR-86580 | 0.0   | 0.0  | 0.0   | 0.0   | 0.0   | 0.0  |
| 21UR-86590 | 8.0   | 4.0  | 7.0   | 1.0   | 8.0   | 1.0  |
| 21UR-8660  | 4.0   | 0.0  | 6.0   | 0.0   | 0.0   | 1.0  |
| 21UR-86600 | 0.0   | 0.0  | 0.0   | 0.0   | 0.0   | 0.0  |
| 21UR-86610 | 0.0   | 0.0  | 0.0   | 0.0   | 0.0   | 0.0  |
| 21UR-86620 | 205.0 | 15.0 | 180.0 | 123.0 | 71.0  | 10.0 |
| 21UR-86630 | 0.0   | 0.0  | 0.0   | 0.0   | 0.0   | 0.0  |
| 21UR-86640 | 0.0   | 0.0  | 0.0   | 0.0   | 0.0   | 0.0  |
| 21UR-86650 | 0.0   | 0.0  | 0.0   | 0.0   | 0.0   | 0.0  |
| 21UR-86660 | 52.5  | 1.0  | 47.0  | 10.0  | 0.0   | 0.0  |
| 21UR-86670 | 0.0   | 0.0  | 1.0   | 0.0   | 0.0   | 0.0  |
| 21UR-86680 | 0.0   | 0.0  | 0.0   | 0.0   | 0.0   | 0.0  |
| 21UR-86690 | 0.0   | 2.0  | 1.0   | 0.0   | 1.0   | 0.0  |
| 21UR-8670  | 87.0  | 84.0 | 122.0 | 33.0  | 119.0 | 3.0  |
| 21UR-86700 | 1.0   | 0.0  | 0.0   | 0.0   | 1.0   | 0.0  |
| 21UR-86710 | 0.0   | 0.0  | 0.0   | 0.0   | 0.0   | 0.0  |
| 21UR-86720 | 0.0   | 0.0  | 0.0   | 0.0   | 0.0   | 0.0  |
| 21UR-86730 | 1.0   | 1.0  | 0.0   | 0.0   | 0.0   | 0.0  |
| 21UR-86740 | 0.0   | 0.0  | 0.0   | 0.0   | 0.0   | 0.0  |
| 21UR-86750 | 4.0   | 3.1  | 2.0   | 0.5   | 2.0   | 0.1  |
| 21UR-86760 | 1.0   | 2.0  | 2.0   | 0.0   | 3.0   | 1.0  |
| 21UR-86770 | 0.0   | 0.0  | 0.0   | 0.0   | 0.0   | 0.0  |
| 21UR-86780 | 0.0   | 0.0  | 0.0   | 0.0   | 0.0   | 0.0  |
| 21UR-86790 | 1.0   | 1.0  | 7.0   | 1.0   | 8.0   | 0.0  |

|            |       |      |       |      |      |     |
|------------|-------|------|-------|------|------|-----|
| 21UR-8680  | 0.0   | 0.0  | 0.0   | 0.0  | 2.0  | 0.0 |
| 21UR-86800 | 0.0   | 0.0  | 1.0   | 0.0  | 1.0  | 0.0 |
| 21UR-86810 | 0.0   | 0.0  | 0.0   | 0.0  | 0.0  | 0.0 |
| 21UR-86820 | 0.0   | 0.0  | 0.0   | 0.0  | 0.0  | 0.0 |
| 21UR-86830 | 0.0   | 0.0  | 0.0   | 0.0  | 0.0  | 0.0 |
| 21UR-86840 | 0.0   | 0.0  | 1.0   | 0.0  | 0.0  | 0.0 |
| 21UR-86850 | 1.0   | 1.0  | 0.0   | 0.0  | 0.0  | 0.0 |
| 21UR-86860 | 1.0   | 0.0  | 0.0   | 0.0  | 0.0  | 0.0 |
| 21UR-86870 | 0.0   | 0.0  | 0.0   | 0.0  | 0.0  | 0.0 |
| 21UR-86880 | 0.0   | 0.0  | 0.0   | 0.0  | 0.0  | 0.0 |
| 21UR-86890 | 1.0   | 0.0  | 1.0   | 0.0  | 0.0  | 0.0 |
| 21UR-8690  | 0.0   | 0.0  | 0.0   | 0.0  | 0.0  | 0.0 |
| 21UR-86900 | 0.0   | 0.0  | 0.0   | 0.0  | 0.0  | 0.0 |
| 21UR-86910 | 0.0   | 0.0  | 0.0   | 0.0  | 0.0  | 0.0 |
| 21UR-86920 | 0.0   | 0.0  | 0.0   | 0.0  | 0.0  | 0.0 |
| 21UR-86930 | 1.0   | 0.0  | 0.0   | 0.0  | 0.0  | 0.0 |
| 21UR-86940 | 0.0   | 0.0  | 1.0   | 0.0  | 1.0  | 0.0 |
| 21UR-86950 | 1.0   | 0.0  | 1.0   | 0.0  | 0.0  | 0.0 |
| 21UR-86960 | 0.0   | 0.0  | 0.0   | 0.0  | 0.0  | 0.0 |
| 21UR-86970 | 32.0  | 5.2  | 30.0  | 12.0 | 1.0  | 0.0 |
| 21UR-86980 | 0.0   | 1.0  | 0.0   | 0.0  | 0.0  | 0.0 |
| 21UR-86990 | 0.0   | 4.0  | 1.0   | 0.0  | 4.0  | 1.0 |
| 21UR-870   | 0.0   | 4.0  | 1.0   | 0.0  | 4.0  | 3.0 |
| 21UR-8700  | 0.0   | 0.0  | 1.0   | 0.0  | 0.0  | 0.0 |
| 21UR-87000 | 0.0   | 0.1  | 4.0   | 0.0  | 0.0  | 0.0 |
| 21UR-87010 | 0.0   | 0.0  | 2.0   | 0.0  | 0.0  | 0.0 |
| 21UR-87020 | 1.0   | 0.0  | 0.0   | 0.0  | 0.0  | 0.0 |
| 21UR-87030 | 0.0   | 0.0  | 1.0   | 0.0  | 0.0  | 0.0 |
| 21UR-87040 | 0.0   | 1.0  | 1.0   | 0.0  | 5.0  | 0.0 |
| 21UR-87050 | 0.0   | 0.0  | 0.0   | 1.0  | 0.0  | 0.0 |
| 21UR-87060 | 11.0  | 0.0  | 0.0   | 4.0  | 1.0  | 1.0 |
| 21UR-87070 | 0.0   | 0.0  | 1.0   | 0.0  | 1.0  | 0.0 |
| 21UR-87080 | 0.0   | 1.0  | 2.0   | 3.0  | 5.0  | 0.0 |
| 21UR-87090 | 0.0   | 0.0  | 0.0   | 0.0  | 0.0  | 0.0 |
| 21UR-8710  | 21.0  | 15.0 | 22.0  | 13.0 | 10.3 | 0.0 |
| 21UR-87100 | 0.0   | 0.0  | 0.0   | 0.0  | 0.0  | 0.0 |
| 21UR-87110 | 0.0   | 0.0  | 1.0   | 0.0  | 0.0  | 0.0 |
| 21UR-87120 | 21.0  | 2.0  | 27.0  | 5.0  | 4.0  | 0.0 |
| 21UR-87130 | 0.0   | 1.0  | 0.0   | 0.0  | 0.0  | 0.0 |
| 21UR-87140 | 0.0   | 0.0  | 0.0   | 0.0  | 0.0  | 0.0 |
| 21UR-87150 | 20.0  | 0.0  | 21.0  | 3.0  | 1.0  | 1.0 |
| 21UR-87160 | 0.0   | 0.0  | 0.0   | 0.0  | 0.0  | 0.0 |
| 21UR-87170 | 0.0   | 0.0  | 0.0   | 0.0  | 0.0  | 0.0 |
| 21UR-87180 | 0.0   | 0.0  | 1.0   | 0.0  | 0.0  | 0.0 |
| 21UR-87190 | 0.0   | 0.0  | 0.0   | 0.0  | 0.0  | 0.0 |
| 21UR-8720  | 0.0   | 0.0  | 0.0   | 0.0  | 0.0  | 0.0 |
| 21UR-87200 | 4.0   | 0.0  | 6.0   | 0.0  | 1.0  | 0.0 |
| 21UR-87210 | 0.0   | 0.0  | 0.0   | 0.0  | 0.0  | 0.0 |
| 21UR-87220 | 0.0   | 0.0  | 1.0   | 0.0  | 1.0  | 0.0 |
| 21UR-87230 | 113.0 | 34.0 | 127.0 | 43.0 | 33.0 | 3.0 |
| 21UR-87240 | 0.0   | 0.0  | 2.0   | 0.0  | 0.0  | 0.0 |

|            |       |       |       |       |       |     |
|------------|-------|-------|-------|-------|-------|-----|
| 21UR-87250 | 0.0   | 1.0   | 1.0   | 0.0   | 1.0   | 0.0 |
| 21UR-87260 | 0.0   | 0.0   | 0.0   | 0.0   | 0.0   | 0.0 |
| 21UR-87270 | 23.0  | 2.0   | 39.0  | 4.0   | 8.0   | 1.0 |
| 21UR-87280 | 17.0  | 3.0   | 8.0   | 6.0   | 9.0   | 1.0 |
| 21UR-87290 | 0.0   | 0.0   | 0.0   | 0.0   | 0.0   | 0.0 |
| 21UR-8730  | 3.0   | 0.0   | 2.0   | 0.0   | 1.0   | 0.0 |
| 21UR-87300 | 12.0  | 0.0   | 6.0   | 1.0   | 0.0   | 0.0 |
| 21UR-87310 | 0.0   | 0.0   | 1.0   | 0.0   | 1.0   | 0.0 |
| 21UR-87320 | 11.0  | 39.8  | 10.0  | 4.0   | 1.0   | 0.0 |
| 21UR-87330 | 0.0   | 0.0   | 0.0   | 0.0   | 0.0   | 0.0 |
| 21UR-87340 | 0.0   | 0.0   | 0.0   | 0.0   | 1.0   | 0.0 |
| 21UR-87350 | 6.0   | 0.0   | 9.0   | 2.0   | 6.0   | 3.0 |
| 21UR-87360 | 0.0   | 0.0   | 0.0   | 0.0   | 0.0   | 0.0 |
| 21UR-87380 | 1.0   | 1.0   | 0.0   | 1.0   | 6.0   | 0.0 |
| 21UR-87390 | 459.8 | 91.0  | 368.0 | 220.0 | 287.5 | 4.0 |
| 21UR-8740  | 0.0   | 0.0   | 0.0   | 1.0   | 0.0   | 0.0 |
| 21UR-87400 | 0.0   | 0.0   | 0.0   | 0.0   | 0.0   | 0.0 |
| 21UR-87410 | 0.0   | 0.0   | 0.0   | 0.0   | 0.0   | 0.0 |
| 21UR-87420 | 0.0   | 0.0   | 0.0   | 0.0   | 0.0   | 0.0 |
| 21UR-87430 | 0.0   | 0.0   | 0.0   | 0.0   | 0.0   | 0.0 |
| 21UR-87440 | 0.0   | 0.0   | 0.0   | 0.0   | 0.0   | 0.0 |
| 21UR-87450 | 0.0   | 0.0   | 0.0   | 0.0   | 0.0   | 0.0 |
| 21UR-87460 | 0.0   | 0.0   | 0.0   | 0.0   | 1.0   | 0.0 |
| 21UR-87470 | 0.0   | 0.0   | 0.0   | 0.0   | 0.0   | 0.0 |
| 21UR-87480 | 0.0   | 0.0   | 0.0   | 0.0   | 0.0   | 0.0 |
| 21UR-87490 | 0.0   | 0.0   | 0.0   | 0.0   | 0.0   | 0.0 |
| 21UR-8750  | 0.0   | 0.0   | 0.0   | 0.0   | 1.0   | 0.0 |
| 21UR-87500 | 10.0  | 0.9   | 8.0   | 8.0   | 3.0   | 0.4 |
| 21UR-87510 | 2.0   | 2.0   | 3.0   | 3.0   | 3.0   | 1.0 |
| 21UR-87520 | 0.0   | 0.0   | 0.0   | 0.0   | 0.0   | 0.0 |
| 21UR-87530 | 0.0   | 0.0   | 0.0   | 0.0   | 0.0   | 0.0 |
| 21UR-87540 | 0.0   | 0.0   | 0.0   | 0.0   | 0.0   | 0.0 |
| 21UR-87550 | 0.0   | 1.0   | 0.0   | 0.0   | 1.0   | 0.0 |
| 21UR-87560 | 1.0   | 1.0   | 0.0   | 0.0   | 0.0   | 0.0 |
| 21UR-87570 | 0.0   | 0.0   | 0.0   | 0.0   | 0.0   | 1.0 |
| 21UR-87580 | 0.0   | 0.0   | 0.0   | 0.0   | 0.0   | 0.0 |
| 21UR-8760  | 12.0  | 9.0   | 20.0  | 5.0   | 40.0  | 1.0 |
| 21UR-87600 | 0.0   | 0.0   | 0.0   | 0.0   | 0.0   | 0.0 |
| 21UR-87610 | 1.0   | 0.0   | 0.0   | 0.0   | 0.0   | 0.0 |
| 21UR-87630 | 0.0   | 0.0   | 0.0   | 0.0   | 0.0   | 0.0 |
| 21UR-87640 | 0.0   | 1.0   | 0.0   | 0.0   | 0.0   | 1.0 |
| 21UR-87650 | 0.0   | 0.0   | 0.0   | 0.0   | 0.0   | 0.0 |
| 21UR-87660 | 28.0  | 0.0   | 39.0  | 12.0  | 1.0   | 0.0 |
| 21UR-87670 | 0.0   | 0.0   | 0.0   | 0.0   | 0.0   | 0.0 |
| 21UR-87680 | 0.0   | 0.0   | 1.0   | 0.0   | 0.0   | 1.0 |
| 21UR-87690 | 0.0   | 0.0   | 0.0   | 0.0   | 0.0   | 0.0 |
| 21UR-8770  | 37.0  | 49.0  | 30.0  | 18.0  | 62.0  | 0.0 |
| 21UR-87700 | 13.0  | 109.5 | 6.0   | 0.0   | 1.0   | 1.0 |
| 21UR-87710 | 0.0   | 0.0   | 0.0   | 0.0   | 0.0   | 0.0 |
| 21UR-87720 | 0.0   | 0.0   | 0.0   | 0.0   | 0.0   | 0.0 |
| 21UR-87730 | 0.0   | 0.0   | 2.0   | 0.0   | 0.0   | 0.0 |

|            |       |      |       |       |      |      |
|------------|-------|------|-------|-------|------|------|
| 21UR-87740 | 0.0   | 0.0  | 0.0   | 0.0   | 0.0  | 0.0  |
| 21UR-87750 | 0.0   | 0.0  | 0.0   | 0.0   | 0.0  | 0.0  |
| 21UR-87760 | 0.0   | 0.0  | 0.0   | 0.0   | 0.0  | 0.0  |
| 21UR-87770 | 0.0   | 0.0  | 0.0   | 0.0   | 0.0  | 0.0  |
| 21UR-87780 | 0.0   | 0.0  | 0.0   | 0.0   | 0.0  | 0.0  |
| 21UR-87790 | 1.0   | 0.0  | 12.0  | 3.0   | 6.0  | 0.0  |
| 21UR-8780  | 0.0   | 0.0  | 0.0   | 0.0   | 1.0  | 0.0  |
| 21UR-87800 | 0.0   | 0.0  | 0.0   | 1.0   | 0.0  | 0.0  |
| 21UR-87810 | 0.0   | 0.0  | 0.0   | 0.0   | 0.1  | 0.0  |
| 21UR-87820 | 0.0   | 0.0  | 0.0   | 0.0   | 0.0  | 0.0  |
| 21UR-87830 | 0.0   | 0.0  | 0.0   | 0.0   | 0.0  | 0.0  |
| 21UR-87840 | 0.0   | 0.0  | 0.0   | 0.0   | 0.0  | 0.0  |
| 21UR-87850 | 1.0   | 0.0  | 0.0   | 0.0   | 0.0  | 0.0  |
| 21UR-87860 | 0.0   | 0.0  | 0.0   | 0.0   | 0.0  | 0.0  |
| 21UR-87870 | 44.0  | 1.0  | 15.0  | 4.0   | 4.0  | 0.0  |
| 21UR-87890 | 4.0   | 0.0  | 0.0   | 0.0   | 0.0  | 0.0  |
| 21UR-8790  | 0.0   | 0.0  | 0.0   | 0.0   | 0.0  | 0.0  |
| 21UR-87900 | 0.0   | 1.0  | 0.0   | 0.0   | 0.0  | 0.0  |
| 21UR-87910 | 1.0   | 0.0  | 1.0   | 0.0   | 0.0  | 0.0  |
| 21UR-87920 | 0.0   | 4.0  | 0.0   | 0.0   | 2.0  | 1.0  |
| 21UR-87930 | 6.0   | 1.0  | 6.0   | 1.0   | 1.0  | 0.0  |
| 21UR-87940 | 1.0   | 0.0  | 0.0   | 0.0   | 2.0  | 0.0  |
| 21UR-87950 | 1.0   | 3.0  | 1.0   | 0.0   | 0.0  | 0.0  |
| 21UR-87960 | 1.0   | 0.0  | 4.0   | 0.0   | 0.0  | 0.0  |
| 21UR-87970 | 0.0   | 0.0  | 0.0   | 0.0   | 0.0  | 0.0  |
| 21UR-87980 | 0.0   | 0.0  | 0.0   | 0.0   | 0.0  | 0.0  |
| 21UR-880   | 37.0  | 16.0 | 31.0  | 26.0  | 1.0  | 3.0  |
| 21UR-8800  | 1.0   | 3.0  | 1.0   | 0.0   | 0.0  | 1.0  |
| 21UR-88000 | 0.0   | 0.0  | 0.0   | 0.0   | 0.0  | 0.0  |
| 21UR-88010 | 0.0   | 0.0  | 0.0   | 0.0   | 0.0  | 0.0  |
| 21UR-88020 | 0.0   | 0.0  | 0.0   | 0.0   | 0.0  | 0.0  |
| 21UR-88030 | 0.0   | 0.0  | 1.0   | 1.0   | 0.0  | 0.0  |
| 21UR-88040 | 0.0   | 0.0  | 0.0   | 0.0   | 0.0  | 0.0  |
| 21UR-88050 | 0.0   | 0.0  | 0.0   | 0.0   | 0.0  | 0.0  |
| 21UR-88060 | 0.0   | 0.0  | 0.0   | 0.0   | 0.0  | 0.0  |
| 21UR-88070 | 0.0   | 0.0  | 4.0   | 0.0   | 0.0  | 0.0  |
| 21UR-88080 | 0.0   | 0.0  | 0.0   | 0.0   | 0.0  | 0.0  |
| 21UR-88090 | 0.0   | 0.0  | 0.0   | 0.0   | 0.0  | 0.0  |
| 21UR-8810  | 0.0   | 3.0  | 0.0   | 0.0   | 7.0  | 1.0  |
| 21UR-88100 | 0.0   | 0.0  | 1.0   | 0.0   | 0.0  | 0.0  |
| 21UR-88110 | 12.0  | 0.0  | 10.0  | 1.0   | 8.0  | 0.0  |
| 21UR-88120 | 0.0   | 0.0  | 0.0   | 0.0   | 0.0  | 0.0  |
| 21UR-88130 | 8.0   | 4.0  | 1.0   | 3.0   | 5.0  | 0.0  |
| 21UR-88140 | 0.0   | 0.0  | 0.0   | 0.0   | 0.0  | 0.0  |
| 21UR-88160 | 4.0   | 2.0  | 2.0   | 0.0   | 8.0  | 0.0  |
| 21UR-88170 | 1.0   | 0.0  | 0.0   | 0.0   | 0.0  | 0.0  |
| 21UR-88180 | 0.0   | 0.0  | 1.0   | 0.0   | 1.0  | 0.0  |
| 21UR-88190 | 0.0   | 0.0  | 0.0   | 0.0   | 0.0  | 0.0  |
| 21UR-8820  | 329.0 | 38.5 | 221.0 | 126.0 | 76.0 | 18.0 |
| 21UR-88200 | 0.0   | 0.0  | 0.0   | 0.0   | 0.0  | 0.0  |
| 21UR-88210 | 115.5 | 34.0 | 91.0  | 38.0  | 29.0 | 3.0  |



|            |       |      |       |      |      |     |
|------------|-------|------|-------|------|------|-----|
| 21UR-88220 | 1.0   | 1.0  | 0.0   | 0.0  | 3.0  | 0.0 |
| 21UR-88230 | 25.0  | 17.1 | 18.0  | 9.0  | 89.0 | 9.0 |
| 21UR-88240 | 0.0   | 0.0  | 0.0   | 0.0  | 0.0  | 0.0 |
| 21UR-88260 | 0.0   | 0.0  | 0.0   | 0.0  | 1.0  | 1.0 |
| 21UR-88280 | 0.0   | 0.0  | 0.0   | 0.0  | 0.0  | 0.0 |
| 21UR-88290 | 0.0   | 0.0  | 0.0   | 0.0  | 0.0  | 0.0 |
| 21UR-8830  | 0.0   | 0.0  | 0.0   | 0.0  | 0.0  | 0.0 |
| 21UR-88300 | 208.3 | 14.1 | 192.0 | 70.0 | 80.0 | 5.0 |
| 21UR-88310 | 0.0   | 0.0  | 0.0   | 0.0  | 0.0  | 0.0 |
| 21UR-88320 | 0.0   | 0.0  | 0.0   | 0.0  | 0.0  | 0.0 |
| 21UR-88330 | 0.0   | 0.0  | 0.0   | 0.0  | 0.0  | 0.0 |
| 21UR-88340 | 0.0   | 0.0  | 0.0   | 0.0  | 0.0  | 0.0 |
| 21UR-88350 | 1.0   | 1.0  | 0.0   | 1.0  | 7.0  | 0.0 |
| 21UR-88360 | 0.0   | 0.0  | 5.0   | 0.0  | 0.0  | 0.0 |
| 21UR-88370 | 1.0   | 0.0  | 0.0   | 0.0  | 0.0  | 0.0 |
| 21UR-88380 | 0.0   | 0.0  | 0.0   | 0.0  | 0.0  | 0.0 |
| 21UR-88390 | 32.0  | 0.0  | 16.0  | 9.0  | 7.0  | 0.0 |
| 21UR-8840  | 1.0   | 0.0  | 5.0   | 0.0  | 1.0  | 0.0 |
| 21UR-88400 | 0.0   | 0.0  | 0.0   | 0.0  | 1.0  | 0.0 |
| 21UR-88410 | 0.0   | 0.0  | 0.0   | 0.0  | 0.0  | 0.0 |
| 21UR-88420 | 0.0   | 0.0  | 0.0   | 0.0  | 0.0  | 0.0 |
| 21UR-88430 | 26.5  | 14.0 | 32.0  | 8.0  | 6.0  | 4.0 |
| 21UR-88440 | 1.0   | 6.0  | 0.0   | 0.0  | 3.0  | 0.0 |
| 21UR-88450 | 39.0  | 9.1  | 25.0  | 11.0 | 4.0  | 0.0 |
| 21UR-88460 | 0.0   | 0.0  | 0.0   | 0.0  | 1.0  | 0.0 |
| 21UR-88470 | 1.0   | 0.0  | 1.0   | 1.0  | 4.0  | 0.0 |
| 21UR-88480 | 0.0   | 0.0  | 0.0   | 1.0  | 1.0  | 0.0 |
| 21UR-88490 | 4.0   | 1.0  | 3.0   | 4.0  | 1.0  | 0.0 |
| 21UR-8850  | 4.0   | 0.0  | 8.0   | 0.0  | 0.0  | 0.0 |
| 21UR-88500 | 0.0   | 0.0  | 0.0   | 0.0  | 0.0  | 0.0 |
| 21UR-88510 | 0.0   | 0.0  | 0.0   | 1.0  | 0.0  | 0.0 |
| 21UR-88520 | 0.0   | 0.0  | 0.0   | 0.0  | 0.0  | 0.0 |
| 21UR-88530 | 0.0   | 0.0  | 0.0   | 0.0  | 0.0  | 0.0 |
| 21UR-88540 | 0.0   | 0.0  | 0.0   | 0.0  | 0.0  | 0.0 |
| 21UR-88550 | 0.0   | 0.0  | 0.0   | 0.0  | 0.0  | 0.0 |
| 21UR-88560 | 0.0   | 0.0  | 0.0   | 0.0  | 0.0  | 0.0 |
| 21UR-88570 | 0.0   | 0.0  | 0.0   | 0.0  | 0.0  | 0.0 |
| 21UR-88580 | 0.0   | 0.0  | 0.0   | 0.0  | 0.0  | 0.0 |
| 21UR-88590 | 0.0   | 0.0  | 0.0   | 0.0  | 0.0  | 0.0 |
| 21UR-8860  | 0.0   | 5.1  | 8.0   | 1.0  | 3.0  | 1.0 |
| 21UR-88600 | 0.0   | 0.0  | 0.0   | 0.0  | 0.0  | 0.0 |
| 21UR-88610 | 0.0   | 0.0  | 0.0   | 0.0  | 0.0  | 0.0 |
| 21UR-88620 | 0.0   | 0.0  | 1.0   | 1.0  | 0.0  | 0.0 |
| 21UR-88630 | 1.0   | 0.0  | 0.0   | 0.0  | 0.0  | 0.0 |
| 21UR-88640 | 0.0   | 0.0  | 0.0   | 0.0  | 0.0  | 0.0 |
| 21UR-88650 | 0.0   | 0.0  | 0.0   | 0.0  | 0.0  | 0.0 |
| 21UR-88660 | 0.0   | 0.0  | 0.0   | 0.0  | 0.0  | 0.0 |
| 21UR-88670 | 0.0   | 0.1  | 0.0   | 0.0  | 0.0  | 0.0 |
| 21UR-88680 | 0.0   | 1.0  | 0.0   | 0.0  | 0.0  | 0.0 |
| 21UR-88690 | 20.0  | 0.0  | 6.0   | 1.0  | 0.0  | 0.0 |
| 21UR-8870  | 21.0  | 4.0  | 22.7  | 8.0  | 6.0  | 0.0 |

|            |      |       |      |      |       |      |
|------------|------|-------|------|------|-------|------|
| 21UR-88700 | 1.0  | 0.0   | 0.0  | 0.0  | 5.0   | 0.0  |
| 21UR-88710 | 95.0 | 3.0   | 51.0 | 6.0  | 6.0   | 1.0  |
| 21UR-88720 | 38.0 | 63.0  | 42.0 | 20.0 | 39.0  | 9.0  |
| 21UR-88740 | 0.0  | 1.0   | 1.0  | 0.0  | 1.0   | 0.0  |
| 21UR-88750 | 0.0  | 0.0   | 0.0  | 0.0  | 0.0   | 0.0  |
| 21UR-88760 | 6.0  | 1.0   | 9.0  | 0.0  | 1.0   | 0.0  |
| 21UR-88770 | 0.0  | 0.0   | 0.0  | 1.0  | 0.0   | 0.0  |
| 21UR-88780 | 0.0  | 0.0   | 0.0  | 0.0  | 0.0   | 0.0  |
| 21UR-88790 | 0.0  | 0.0   | 0.0  | 0.0  | 0.0   | 0.0  |
| 21UR-8880  | 79.0 | 182.0 | 50.0 | 50.0 | 125.0 | 57.0 |
| 21UR-88800 | 0.0  | 0.0   | 0.0  | 0.0  | 0.0   | 0.0  |
| 21UR-88810 | 0.0  | 0.0   | 0.0  | 0.0  | 0.0   | 0.0  |
| 21UR-88820 | 0.0  | 0.0   | 0.0  | 0.0  | 0.0   | 0.0  |
| 21UR-88830 | 0.0  | 0.0   | 0.0  | 0.0  | 0.0   | 0.0  |
| 21UR-88840 | 0.0  | 0.0   | 0.0  | 0.0  | 0.0   | 0.0  |
| 21UR-88850 | 0.0  | 0.0   | 0.0  | 0.0  | 0.0   | 0.0  |
| 21UR-88860 | 0.0  | 0.0   | 0.0  | 0.0  | 0.0   | 0.0  |
| 21UR-88870 | 0.0  | 0.0   | 0.0  | 0.0  | 0.0   | 0.0  |
| 21UR-88880 | 1.0  | 1.0   | 0.0  | 0.0  | 3.0   | 0.0  |
| 21UR-88890 | 1.0  | 0.0   | 1.0  | 0.0  | 0.0   | 1.0  |
| 21UR-8890  | 0.0  | 0.0   | 0.0  | 0.0  | 0.0   | 0.0  |
| 21UR-88900 | 0.0  | 0.0   | 0.0  | 0.0  | 0.0   | 0.0  |
| 21UR-88910 | 0.0  | 0.0   | 0.0  | 0.0  | 0.0   | 0.0  |
| 21UR-88920 | 0.0  | 0.0   | 0.0  | 0.0  | 0.0   | 0.0  |
| 21UR-88930 | 0.0  | 0.0   | 0.0  | 0.0  | 0.0   | 0.0  |
| 21UR-88940 | 0.0  | 0.0   | 4.0  | 0.0  | 0.0   | 0.0  |
| 21UR-88950 | 0.0  | 0.0   | 0.0  | 0.0  | 0.0   | 0.0  |
| 21UR-88960 | 0.0  | 0.0   | 0.0  | 0.0  | 0.0   | 0.0  |
| 21UR-88970 | 0.0  | 0.0   | 0.0  | 0.0  | 0.0   | 0.0  |
| 21UR-88980 | 0.0  | 0.0   | 0.0  | 0.0  | 0.0   | 0.0  |
| 21UR-88990 | 0.0  | 0.0   | 0.0  | 0.0  | 0.0   | 0.0  |
| 21UR-890   | 0.0  | 1.0   | 2.0  | 1.0  | 1.0   | 0.0  |
| 21UR-8900  | 4.0  | 3.0   | 8.0  | 1.0  | 1.0   | 0.0  |
| 21UR-89000 | 0.0  | 1.0   | 0.0  | 1.0  | 4.0   | 0.0  |
| 21UR-89010 | 0.0  | 0.0   | 0.0  | 0.0  | 0.0   | 0.0  |
| 21UR-89020 | 0.0  | 0.0   | 0.0  | 0.0  | 0.0   | 0.0  |
| 21UR-89030 | 0.0  | 0.0   | 0.0  | 0.0  | 0.0   | 0.0  |
| 21UR-89040 | 12.0 | 3.0   | 21.0 | 0.0  | 8.0   | 1.0  |
| 21UR-89050 | 1.0  | 2.0   | 0.0  | 0.0  | 23.5  | 0.0  |
| 21UR-89060 | 4.0  | 0.0   | 3.0  | 0.0  | 1.0   | 1.0  |
| 21UR-89070 | 1.0  | 0.0   | 1.0  | 1.0  | 3.0   | 0.0  |
| 21UR-89080 | 0.0  | 0.0   | 0.0  | 0.0  | 0.0   | 0.0  |
| 21UR-89090 | 0.0  | 0.0   | 0.0  | 0.0  | 2.0   | 0.0  |
| 21UR-8910  | 1.0  | 0.0   | 4.0  | 0.0  | 0.0   | 0.0  |
| 21UR-89100 | 0.0  | 0.0   | 0.0  | 0.0  | 0.0   | 0.0  |
| 21UR-89110 | 0.0  | 0.0   | 1.0  | 0.0  | 0.0   | 0.0  |
| 21UR-89120 | 0.0  | 0.0   | 0.0  | 0.0  | 1.0   | 0.0  |
| 21UR-89130 | 0.0  | 1.0   | 1.0  | 0.0  | 0.0   | 0.0  |
| 21UR-89140 | 0.0  | 0.0   | 0.0  | 0.0  | 0.0   | 0.0  |
| 21UR-89150 | 0.0  | 0.0   | 0.0  | 0.0  | 0.0   | 0.0  |
| 21UR-89170 | 0.0  | 0.0   | 0.0  | 0.0  | 0.0   | 0.0  |

|            |        |      |       |       |       |      |
|------------|--------|------|-------|-------|-------|------|
| 21UR-89180 | 0.0    | 0.0  | 0.0   | 0.0   | 0.0   | 0.0  |
| 21UR-89190 | 0.0    | 1.0  | 1.0   | 1.0   | 0.0   | 0.0  |
| 21UR-8920  | 0.0    | 6.0  | 0.0   | 0.0   | 6.0   | 1.0  |
| 21UR-89200 | 0.0    | 0.0  | 0.0   | 0.0   | 0.0   | 0.0  |
| 21UR-89210 | 0.0    | 0.0  | 1.0   | 0.0   | 1.0   | 0.0  |
| 21UR-89220 | 4.0    | 2.5  | 5.0   | 0.0   | 3.0   | 0.0  |
| 21UR-89230 | 0.0    | 0.0  | 0.0   | 0.0   | 0.0   | 0.0  |
| 21UR-89240 | 0.0    | 0.0  | 4.0   | 1.0   | 1.0   | 1.0  |
| 21UR-89250 | 1.0    | 0.0  | 0.0   | 0.0   | 0.0   | 0.0  |
| 21UR-89260 | 0.0    | 0.0  | 0.0   | 0.0   | 0.0   | 0.0  |
| 21UR-89270 | 0.0    | 0.0  | 0.0   | 0.0   | 1.0   | 1.0  |
| 21UR-89280 | 0.0    | 0.0  | 0.0   | 0.0   | 0.0   | 0.0  |
| 21UR-89290 | 0.0    | 0.0  | 4.0   | 1.0   | 1.0   | 0.0  |
| 21UR-8930  | 12.0   | 0.0  | 6.0   | 0.0   | 0.0   | 0.0  |
| 21UR-89300 | 0.0    | 0.0  | 0.0   | 0.0   | 0.0   | 0.0  |
| 21UR-89310 | 0.0    | 0.0  | 0.0   | 0.0   | 1.0   | 0.0  |
| 21UR-89320 | 0.0    | 0.0  | 0.0   | 0.0   | 0.0   | 0.0  |
| 21UR-89330 | 2.0    | 0.0  | 6.0   | 0.0   | 0.0   | 0.0  |
| 21UR-89340 | 0.0    | 0.0  | 0.0   | 0.0   | 1.0   | 0.0  |
| 21UR-89350 | 5.0    | 1.0  | 0.0   | 1.0   | 0.0   | 0.0  |
| 21UR-89360 | 0.0    | 0.0  | 0.0   | 0.0   | 0.0   | 0.0  |
| 21UR-89370 | 43.0   | 3.0  | 30.0  | 7.0   | 20.0  | 0.0  |
| 21UR-89380 | 7.0    | 6.0  | 2.0   | 0.0   | 3.0   | 0.0  |
| 21UR-89390 | 0.0    | 0.0  | 0.0   | 0.0   | 0.0   | 0.0  |
| 21UR-8940  | 0.0    | 0.0  | 0.0   | 0.0   | 0.0   | 0.0  |
| 21UR-89400 | 0.0    | 0.0  | 0.0   | 0.0   | 0.0   | 0.0  |
| 21UR-89420 | 0.0    | 0.0  | 0.0   | 0.0   | 9.0   | 1.0  |
| 21UR-89430 | 1081.0 | 77.4 | 784.2 | 446.5 | 173.5 | 10.0 |
| 21UR-89440 | 0.0    | 1.0  | 1.0   | 0.0   | 0.0   | 0.0  |
| 21UR-89450 | 0.0    | 0.0  | 0.0   | 0.0   | 0.0   | 0.0  |
| 21UR-89460 | 17.0   | 19.0 | 28.0  | 8.0   | 12.0  | 7.0  |
| 21UR-89470 | 0.0    | 0.0  | 0.0   | 0.0   | 0.0   | 0.0  |
| 21UR-89480 | 14.0   | 38.0 | 18.0  | 8.0   | 30.7  | 5.0  |
| 21UR-89490 | 10.0   | 1.0  | 1.0   | 6.0   | 1.0   | 0.0  |
| 21UR-8950  | 46.5   | 30.0 | 49.0  | 26.0  | 34.5  | 1.0  |
| 21UR-89500 | 1.0    | 0.0  | 0.0   | 0.0   | 0.0   | 0.0  |
| 21UR-89510 | 0.0    | 0.0  | 0.0   | 0.0   | 0.0   | 0.0  |
| 21UR-89520 | 157.0  | 25.0 | 120.5 | 40.0  | 13.0  | 4.0  |
| 21UR-89530 | 1.0    | 0.0  | 0.0   | 0.0   | 0.0   | 0.0  |
| 21UR-89540 | 0.0    | 0.0  | 0.0   | 0.0   | 0.0   | 0.0  |
| 21UR-89550 | 7.0    | 6.1  | 23.0  | 7.0   | 6.0   | 0.0  |
| 21UR-89560 | 3.0    | 2.0  | 2.0   | 0.0   | 0.0   | 0.0  |
| 21UR-89580 | 0.0    | 0.0  | 0.0   | 0.0   | 0.0   | 0.0  |
| 21UR-89590 | 0.0    | 0.3  | 0.0   | 0.0   | 0.0   | 0.0  |
| 21UR-8960  | 1.0    | 0.0  | 0.0   | 0.0   | 1.0   | 0.0  |
| 21UR-89600 | 0.0    | 0.0  | 1.0   | 0.0   | 0.0   | 0.0  |
| 21UR-89610 | 7.5    | 5.0  | 3.0   | 0.0   | 1.0   | 2.0  |
| 21UR-89620 | 9.0    | 47.0 | 14.0  | 2.0   | 31.0  | 2.0  |
| 21UR-89630 | 0.0    | 0.0  | 0.0   | 0.0   | 0.0   | 0.0  |
| 21UR-89640 | 2.0    | 6.0  | 0.0   | 0.0   | 7.5   | 0.0  |
| 21UR-89650 | 0.0    | 0.0  | 0.0   | 0.0   | 0.0   | 0.0  |

|            |       |      |       |      |      |     |
|------------|-------|------|-------|------|------|-----|
| 21UR-89660 | 0.0   | 0.0  | 0.0   | 0.0  | 1.0  | 0.0 |
| 21UR-89670 | 11.0  | 8.6  | 7.0   | 4.0  | 8.0  | 0.0 |
| 21UR-89680 | 0.0   | 0.0  | 0.0   | 0.0  | 0.0  | 0.0 |
| 21UR-89690 | 50.0  | 2.0  | 70.0  | 22.0 | 6.0  | 0.0 |
| 21UR-8970  | 0.0   | 0.0  | 0.0   | 0.0  | 0.0  | 0.0 |
| 21UR-89700 | 0.0   | 0.0  | 0.0   | 0.0  | 0.0  | 0.0 |
| 21UR-89710 | 0.0   | 0.0  | 0.0   | 0.0  | 0.0  | 0.0 |
| 21UR-89720 | 0.0   | 0.0  | 0.0   | 0.0  | 0.0  | 0.0 |
| 21UR-89730 | 0.0   | 0.0  | 0.0   | 0.0  | 0.0  | 0.0 |
| 21UR-89740 | 9.0   | 1.0  | 4.5   | 3.0  | 2.0  | 0.0 |
| 21UR-89750 | 0.0   | 0.0  | 0.0   | 0.0  | 1.0  | 0.0 |
| 21UR-89760 | 3.0   | 0.0  | 1.0   | 0.0  | 2.0  | 0.0 |
| 21UR-89770 | 0.0   | 0.0  | 0.0   | 0.0  | 0.0  | 0.0 |
| 21UR-89790 | 7.0   | 0.0  | 1.0   | 0.0  | 1.0  | 0.0 |
| 21UR-8980  | 178.0 | 52.5 | 132.0 | 36.0 | 67.0 | 3.0 |
| 21UR-89800 | 4.0   | 1.0  | 1.0   | 0.0  | 7.3  | 0.0 |
| 21UR-89810 | 0.0   | 0.0  | 0.0   | 0.0  | 0.0  | 0.0 |
| 21UR-89820 | 0.0   | 0.0  | 0.0   | 0.0  | 0.0  | 0.0 |
| 21UR-89830 | 2.0   | 1.0  | 1.0   | 0.0  | 1.0  | 0.0 |
| 21UR-89840 | 246.0 | 7.0  | 181.0 | 82.1 | 80.0 | 0.0 |
| 21UR-89850 | 0.0   | 12.0 | 4.0   | 0.0  | 24.5 | 0.0 |
| 21UR-89860 | 0.0   | 1.0  | 0.0   | 0.0  | 0.0  | 0.0 |
| 21UR-89870 | 10.0  | 0.0  | 9.0   | 0.0  | 0.0  | 0.0 |
| 21UR-89880 | 0.0   | 0.0  | 0.0   | 0.0  | 0.0  | 0.0 |
| 21UR-89890 | 0.0   | 0.0  | 0.0   | 0.0  | 0.0  | 0.0 |
| 21UR-8990  | 0.0   | 0.0  | 0.0   | 0.0  | 0.2  | 0.0 |
| 21UR-89900 | 0.0   | 0.0  | 0.0   | 0.0  | 0.0  | 0.0 |
| 21UR-89910 | 0.0   | 0.0  | 0.0   | 0.0  | 1.0  | 0.0 |
| 21UR-89920 | 0.0   | 0.0  | 0.0   | 0.0  | 0.0  | 0.0 |
| 21UR-89930 | 0.0   | 1.0  | 0.0   | 0.0  | 1.0  | 0.0 |
| 21UR-89940 | 1.0   | 8.0  | 0.0   | 0.0  | 12.0 | 0.0 |
| 21UR-89950 | 0.0   | 0.0  | 0.0   | 0.0  | 1.0  | 0.0 |
| 21UR-89960 | 0.0   | 0.0  | 0.0   | 0.0  | 0.0  | 0.0 |
| 21UR-89970 | 0.0   | 0.0  | 0.0   | 0.0  | 0.0  | 1.0 |
| 21UR-89980 | 0.0   | 0.0  | 0.0   | 0.0  | 0.0  | 0.0 |
| 21UR-89990 | 2.0   | 0.0  | 6.0   | 1.0  | 0.0  | 0.0 |
| 21UR-90    | 8.0   | 24.0 | 1.0   | 0.0  | 28.0 | 1.0 |
| 21UR-900   | 10.0  | 11.0 | 7.0   | 9.0  | 1.0  | 0.0 |
| 21UR-9000  | 1.0   | 1.0  | 0.0   | 1.0  | 4.0  | 0.0 |
| 21UR-90000 | 0.0   | 0.0  | 0.0   | 0.0  | 0.0  | 0.0 |
| 21UR-90010 | 0.0   | 0.0  | 0.0   | 0.0  | 0.0  | 0.0 |
| 21UR-90020 | 0.0   | 0.0  | 1.0   | 0.0  | 2.0  | 0.0 |
| 21UR-90030 | 0.0   | 4.0  | 0.0   | 0.0  | 4.0  | 0.0 |
| 21UR-90040 | 20.0  | 0.0  | 24.0  | 11.0 | 6.0  | 8.0 |
| 21UR-90050 | 0.0   | 0.0  | 0.0   | 0.0  | 0.0  | 0.0 |
| 21UR-90060 | 0.0   | 0.0  | 0.0   | 0.0  | 0.0  | 0.0 |
| 21UR-90070 | 0.0   | 0.0  | 1.0   | 0.0  | 0.0  | 0.0 |
| 21UR-90080 | 0.0   | 0.0  | 0.0   | 0.0  | 0.0  | 0.0 |
| 21UR-90090 | 0.0   | 0.0  | 0.0   | 0.0  | 0.0  | 0.0 |
| 21UR-9010  | 8.0   | 1.0  | 8.0   | 1.0  | 4.0  | 0.0 |
| 21UR-90100 | 0.0   | 0.0  | 0.0   | 0.0  | 0.0  | 0.0 |

|            |       |       |       |       |        |       |
|------------|-------|-------|-------|-------|--------|-------|
| 21UR-90110 | 0.0   | 1.0   | 0.0   | 0.0   | 2.0    | 0.0   |
| 21UR-90120 | 0.0   | 0.0   | 0.0   | 0.0   | 0.0    | 0.0   |
| 21UR-90130 | 0.0   | 0.0   | 0.0   | 0.0   | 1.0    | 0.0   |
| 21UR-90140 | 0.0   | 0.0   | 0.0   | 0.0   | 0.0    | 0.0   |
| 21UR-90150 | 0.0   | 0.0   | 0.0   | 0.0   | 0.0    | 0.0   |
| 21UR-90160 | 0.0   | 0.0   | 0.0   | 0.0   | 0.0    | 0.0   |
| 21UR-90170 | 0.0   | 0.0   | 1.0   | 0.0   | 0.0    | 0.0   |
| 21UR-90180 | 0.0   | 0.0   | 0.0   | 0.0   | 1.0    | 0.0   |
| 21UR-90190 | 0.0   | 4.0   | 1.0   | 0.0   | 0.0    | 0.0   |
| 21UR-9020  | 0.0   | 0.0   | 0.0   | 0.0   | 0.0    | 0.0   |
| 21UR-90200 | 0.0   | 0.0   | 0.0   | 0.0   | 0.0    | 0.0   |
| 21UR-90210 | 4.0   | 0.0   | 0.0   | 0.0   | 0.0    | 0.0   |
| 21UR-90220 | 847.3 | 841.0 | 614.8 | 347.0 | 1293.4 | 148.0 |
| 21UR-90230 | 8.0   | 0.0   | 0.0   | 0.0   | 1.0    | 0.0   |
| 21UR-90240 | 0.0   | 0.0   | 0.0   | 0.0   | 0.0    | 0.0   |
| 21UR-90250 | 0.0   | 0.0   | 0.0   | 0.0   | 0.0    | 0.0   |
| 21UR-90260 | 0.0   | 0.0   | 0.0   | 0.0   | 0.0    | 0.1   |
| 21UR-90270 | 0.0   | 0.0   | 0.0   | 0.0   | 0.0    | 0.0   |
| 21UR-90280 | 0.0   | 0.0   | 0.0   | 0.0   | 0.0    | 0.0   |
| 21UR-90290 | 0.0   | 0.0   | 0.0   | 0.0   | 0.0    | 0.0   |
| 21UR-9030  | 4.0   | 0.0   | 0.0   | 0.0   | 0.0    | 0.0   |
| 21UR-90300 | 0.0   | 0.0   | 0.0   | 0.0   | 0.0    | 0.0   |
| 21UR-90310 | 0.0   | 0.0   | 0.0   | 0.0   | 0.0    | 0.0   |
| 21UR-90320 | 0.0   | 0.0   | 0.0   | 0.0   | 2.0    | 0.0   |
| 21UR-90330 | 0.0   | 0.0   | 0.0   | 1.0   | 0.0    | 0.0   |
| 21UR-90340 | 0.0   | 0.0   | 0.0   | 0.0   | 0.0    | 0.0   |
| 21UR-90350 | 0.0   | 0.0   | 0.0   | 0.0   | 0.0    | 0.0   |
| 21UR-90360 | 0.0   | 0.0   | 1.0   | 0.0   | 0.0    | 0.0   |
| 21UR-90370 | 2.0   | 3.0   | 3.0   | 0.0   | 0.0    | 0.0   |
| 21UR-90380 | 1.0   | 1.0   | 1.0   | 0.0   | 0.0    | 0.0   |
| 21UR-90390 | 0.0   | 0.0   | 0.0   | 0.0   | 0.0    | 0.0   |
| 21UR-9040  | 0.0   | 0.0   | 0.0   | 0.0   | 0.0    | 0.0   |
| 21UR-90400 | 0.0   | 0.0   | 1.0   | 0.0   | 0.0    | 0.0   |
| 21UR-90410 | 0.0   | 0.0   | 0.0   | 0.0   | 1.0    | 0.0   |
| 21UR-90420 | 5.0   | 0.5   | 4.0   | 7.0   | 3.0    | 0.0   |
| 21UR-90430 | 590.0 | 279.0 | 547.5 | 162.5 | 322.6  | 58.0  |
| 21UR-90440 | 0.0   | 0.0   | 0.0   | 0.0   | 0.0    | 0.0   |
| 21UR-90450 | 0.0   | 0.0   | 1.0   | 0.0   | 0.0    | 0.0   |
| 21UR-90460 | 277.0 | 17.0  | 113.0 | 121.5 | 27.0   | 0.0   |
| 21UR-90470 | 0.0   | 0.0   | 0.0   | 0.0   | 0.0    | 0.0   |
| 21UR-90480 | 0.0   | 0.0   | 0.0   | 0.0   | 0.0    | 0.0   |
| 21UR-90490 | 0.0   | 0.0   | 1.0   | 0.0   | 0.0    | 0.0   |
| 21UR-9050  | 13.0  | 0.0   | 5.0   | 0.0   | 2.0    | 0.0   |
| 21UR-90500 | 4.0   | 2.0   | 6.0   | 1.0   | 2.0    | 0.0   |
| 21UR-90510 | 0.0   | 0.0   | 0.0   | 0.0   | 0.0    | 0.0   |
| 21UR-90520 | 0.0   | 0.0   | 0.0   | 0.0   | 0.0    | 0.0   |
| 21UR-90530 | 0.0   | 2.0   | 0.0   | 0.0   | 1.0    | 1.0   |
| 21UR-90540 | 1.0   | 0.0   | 15.0  | 4.0   | 7.0    | 0.0   |
| 21UR-90550 | 0.0   | 1.0   | 0.0   | 1.0   | 0.0    | 0.0   |
| 21UR-90560 | 0.0   | 0.0   | 0.0   | 0.0   | 1.0    | 0.0   |
| 21UR-90570 | 6.0   | 3.0   | 12.0  | 6.0   | 4.0    | 1.0   |

|            |       |      |       |       |      |     |
|------------|-------|------|-------|-------|------|-----|
| 21UR-90580 | 0.0   | 0.0  | 0.0   | 0.0   | 0.0  | 0.0 |
| 21UR-90590 | 1.0   | 0.0  | 2.0   | 0.0   | 0.0  | 0.0 |
| 21UR-9060  | 0.0   | 4.0  | 0.0   | 0.0   | 1.0  | 1.0 |
| 21UR-90600 | 0.0   | 0.0  | 0.0   | 0.0   | 1.0  | 0.0 |
| 21UR-90610 | 22.0  | 0.0  | 27.1  | 3.0   | 1.0  | 2.0 |
| 21UR-90620 | 1.0   | 0.0  | 1.0   | 0.0   | 0.0  | 0.0 |
| 21UR-90630 | 0.0   | 0.0  | 0.0   | 0.0   | 0.0  | 0.0 |
| 21UR-90640 | 0.0   | 0.0  | 0.0   | 0.0   | 0.0  | 0.0 |
| 21UR-90650 | 0.0   | 0.0  | 0.0   | 0.0   | 1.0  | 0.0 |
| 21UR-90660 | 1.0   | 1.0  | 1.0   | 1.0   | 0.0  | 0.0 |
| 21UR-90670 | 0.0   | 0.0  | 0.0   | 0.0   | 1.0  | 0.0 |
| 21UR-90680 | 0.0   | 0.0  | 0.0   | 0.0   | 0.0  | 0.0 |
| 21UR-90690 | 39.0  | 8.0  | 17.0  | 6.0   | 2.0  | 1.0 |
| 21UR-9070  | 0.0   | 0.0  | 0.0   | 0.0   | 0.0  | 0.0 |
| 21UR-90700 | 0.0   | 0.0  | 0.0   | 0.0   | 0.0  | 0.0 |
| 21UR-90710 | 18.0  | 0.0  | 9.0   | 9.0   | 6.0  | 0.0 |
| 21UR-90720 | 0.0   | 0.0  | 1.0   | 0.0   | 0.0  | 0.0 |
| 21UR-90730 | 5.0   | 18.0 | 13.5  | 3.0   | 20.5 | 6.0 |
| 21UR-90740 | 0.0   | 0.0  | 0.0   | 0.0   | 0.0  | 0.0 |
| 21UR-90750 | 0.0   | 0.0  | 0.0   | 0.0   | 2.0  | 0.0 |
| 21UR-90760 | 5.0   | 0.0  | 2.0   | 1.0   | 0.0  | 0.0 |
| 21UR-90770 | 0.0   | 0.0  | 0.0   | 0.0   | 0.0  | 0.0 |
| 21UR-90780 | 4.0   | 0.0  | 1.0   | 0.0   | 0.0  | 0.0 |
| 21UR-90790 | 0.0   | 0.0  | 0.0   | 0.0   | 0.0  | 0.0 |
| 21UR-9080  | 329.3 | 52.0 | 342.0 | 180.0 | 73.0 | 2.0 |
| 21UR-90800 | 0.0   | 1.0  | 0.0   | 0.0   | 0.0  | 0.0 |
| 21UR-90820 | 1.0   | 0.0  | 6.0   | 0.0   | 0.0  | 0.0 |
| 21UR-90830 | 0.0   | 0.0  | 0.0   | 0.0   | 0.0  | 0.0 |
| 21UR-90840 | 0.0   | 0.0  | 0.0   | 0.0   | 0.0  | 0.0 |
| 21UR-90850 | 0.0   | 0.0  | 0.0   | 0.0   | 1.0  | 0.0 |
| 21UR-90860 | 2.0   | 1.0  | 1.0   | 0.0   | 1.0  | 0.0 |
| 21UR-90870 | 0.0   | 0.0  | 0.0   | 0.0   | 0.0  | 0.0 |
| 21UR-90880 | 0.0   | 4.0  | 0.0   | 0.0   | 0.0  | 0.0 |
| 21UR-90890 | 0.0   | 0.0  | 0.0   | 3.0   | 3.0  | 0.0 |
| 21UR-9090  | 1.0   | 1.0  | 0.0   | 0.0   | 0.0  | 0.0 |
| 21UR-90900 | 0.0   | 0.0  | 0.0   | 0.0   | 0.0  | 0.0 |
| 21UR-90910 | 1.0   | 0.0  | 0.0   | 0.0   | 0.0  | 0.0 |
| 21UR-90920 | 0.0   | 0.0  | 1.0   | 0.0   | 1.0  | 0.0 |
| 21UR-90930 | 1.0   | 0.0  | 5.0   | 0.0   | 0.0  | 0.0 |
| 21UR-90940 | 0.0   | 0.0  | 0.0   | 0.0   | 0.0  | 0.0 |
| 21UR-90950 | 0.0   | 0.0  | 0.0   | 0.0   | 0.0  | 0.0 |
| 21UR-90960 | 24.0  | 24.0 | 22.0  | 22.0  | 21.0 | 6.0 |
| 21UR-90970 | 0.0   | 0.0  | 0.0   | 0.0   | 0.0  | 0.0 |
| 21UR-90980 | 0.0   | 0.0  | 0.0   | 0.0   | 0.0  | 0.0 |
| 21UR-90990 | 0.0   | 0.0  | 0.0   | 0.0   | 0.0  | 0.0 |
| 21UR-910   | 0.0   | 0.0  | 0.0   | 0.0   | 0.0  | 0.0 |
| 21UR-9100  | 1.0   | 6.0  | 0.0   | 3.0   | 8.0  | 0.0 |
| 21UR-91000 | 15.0  | 2.0  | 9.0   | 3.0   | 2.0  | 0.0 |
| 21UR-91010 | 4.0   | 4.0  | 2.0   | 3.0   | 2.0  | 1.0 |
| 21UR-91020 | 0.0   | 0.0  | 0.0   | 0.0   | 0.0  | 0.0 |
| 21UR-91030 | 0.0   | 0.6  | 1.0   | 0.0   | 0.0  | 0.0 |

|            |       |      |       |      |      |     |
|------------|-------|------|-------|------|------|-----|
| 21UR-91040 | 4.0   | 0.0  | 0.0   | 0.0  | 0.0  | 0.0 |
| 21UR-91050 | 0.0   | 0.0  | 0.0   | 0.0  | 1.0  | 0.0 |
| 21UR-91060 | 0.0   | 0.0  | 0.0   | 0.0  | 0.0  | 0.0 |
| 21UR-91070 | 0.0   | 0.0  | 0.0   | 0.0  | 0.0  | 0.0 |
| 21UR-91080 | 0.0   | 0.5  | 0.0   | 0.0  | 0.0  | 1.0 |
| 21UR-91090 | 0.0   | 3.0  | 0.0   | 0.0  | 0.0  | 1.0 |
| 21UR-9110  | 6.0   | 8.0  | 8.0   | 0.0  | 4.0  | 1.0 |
| 21UR-91100 | 0.0   | 0.0  | 0.0   | 0.0  | 0.0  | 0.0 |
| 21UR-91110 | 0.0   | 0.0  | 0.0   | 0.0  | 0.0  | 0.0 |
| 21UR-91120 | 5.0   | 16.0 | 1.0   | 1.0  | 8.0  | 0.0 |
| 21UR-91130 | 7.0   | 4.0  | 6.0   | 0.0  | 20.0 | 0.0 |
| 21UR-91140 | 0.0   | 0.0  | 0.0   | 0.0  | 0.0  | 0.0 |
| 21UR-91150 | 0.0   | 0.0  | 0.0   | 0.0  | 0.0  | 0.0 |
| 21UR-91160 | 0.0   | 0.0  | 0.0   | 0.0  | 0.0  | 0.0 |
| 21UR-91180 | 0.0   | 1.0  | 0.0   | 0.0  | 1.0  | 0.0 |
| 21UR-91190 | 0.0   | 0.0  | 0.0   | 0.0  | 0.0  | 0.0 |
| 21UR-9120  | 0.0   | 0.0  | 0.0   | 0.0  | 1.0  | 0.5 |
| 21UR-91200 | 0.0   | 0.0  | 0.0   | 0.0  | 0.0  | 0.0 |
| 21UR-91210 | 0.0   | 0.0  | 1.0   | 0.0  | 0.0  | 0.0 |
| 21UR-91220 | 1.0   | 1.0  | 4.0   | 0.0  | 5.0  | 0.0 |
| 21UR-91230 | 14.5  | 4.0  | 9.0   | 11.0 | 13.0 | 1.0 |
| 21UR-91240 | 3.0   | 0.0  | 0.0   | 0.0  | 0.0  | 0.0 |
| 21UR-91250 | 2.0   | 2.0  | 1.0   | 0.0  | 0.0  | 0.0 |
| 21UR-91260 | 115.0 | 59.4 | 123.0 | 84.0 | 77.0 | 1.1 |
| 21UR-91270 | 0.0   | 0.1  | 0.0   | 0.0  | 0.0  | 0.0 |
| 21UR-91280 | 16.0  | 1.0  | 14.0  | 1.0  | 6.0  | 0.0 |
| 21UR-91290 | 0.0   | 1.0  | 1.0   | 0.0  | 0.0  | 0.0 |
| 21UR-9130  | 58.0  | 3.0  | 55.0  | 6.0  | 20.0 | 0.0 |
| 21UR-91300 | 0.0   | 0.0  | 0.0   | 0.0  | 0.0  | 0.0 |
| 21UR-91310 | 0.0   | 0.0  | 0.0   | 0.0  | 0.0  | 0.0 |
| 21UR-91320 | 0.0   | 0.0  | 0.0   | 0.0  | 0.0  | 0.0 |
| 21UR-91330 | 0.0   | 0.0  | 0.0   | 0.0  | 0.0  | 0.0 |
| 21UR-91340 | 0.0   | 1.0  | 0.0   | 0.0  | 0.0  | 0.0 |
| 21UR-91350 | 0.0   | 0.0  | 0.0   | 0.0  | 0.0  | 0.0 |
| 21UR-91360 | 0.0   | 0.0  | 0.0   | 0.0  | 0.0  | 0.0 |
| 21UR-91370 | 1.0   | 0.0  | 0.0   | 0.0  | 0.0  | 0.0 |
| 21UR-91380 | 0.0   | 0.0  | 0.0   | 0.0  | 0.0  | 0.0 |
| 21UR-91390 | 0.0   | 1.0  | 0.0   | 0.0  | 0.0  | 0.0 |
| 21UR-9140  | 1.0   | 0.0  | 0.0   | 0.0  | 0.0  | 4.0 |
| 21UR-91400 | 0.0   | 0.0  | 0.0   | 0.0  | 0.0  | 0.0 |
| 21UR-91410 | 0.0   | 0.0  | 0.0   | 0.0  | 0.0  | 0.0 |
| 21UR-91420 | 3.0   | 1.0  | 0.0   | 0.0  | 0.0  | 0.0 |
| 21UR-91430 | 0.0   | 0.0  | 0.0   | 0.0  | 0.0  | 0.0 |
| 21UR-91440 | 0.0   | 0.0  | 0.0   | 0.0  | 0.0  | 0.0 |
| 21UR-91450 | 0.0   | 1.0  | 0.0   | 0.0  | 0.0  | 0.0 |
| 21UR-91460 | 0.0   | 0.0  | 0.0   | 0.0  | 0.0  | 0.0 |
| 21UR-91470 | 113.0 | 6.0  | 83.0  | 20.0 | 0.0  | 0.0 |
| 21UR-91480 | 0.0   | 0.0  | 1.0   | 0.0  | 1.0  | 0.0 |
| 21UR-91490 | 0.0   | 1.0  | 0.0   | 0.0  | 0.0  | 0.0 |
| 21UR-9150  | 7.0   | 24.0 | 1.0   | 1.0  | 19.0 | 2.0 |
| 21UR-91500 | 1.0   | 3.0  | 2.0   | 0.0  | 7.0  | 1.0 |

|            |       |      |       |      |       |     |
|------------|-------|------|-------|------|-------|-----|
| 21UR-91510 | 8.0   | 0.0  | 8.0   | 1.0  | 4.0   | 0.0 |
| 21UR-91520 | 0.0   | 0.0  | 0.0   | 0.0  | 1.0   | 0.0 |
| 21UR-91530 | 0.0   | 0.0  | 0.0   | 0.0  | 0.0   | 0.0 |
| 21UR-91540 | 0.0   | 0.0  | 0.0   | 0.0  | 0.0   | 0.0 |
| 21UR-91550 | 2.0   | 0.0  | 1.0   | 0.0  | 0.0   | 0.0 |
| 21UR-91560 | 0.0   | 0.0  | 0.0   | 0.0  | 0.0   | 0.0 |
| 21UR-91570 | 0.0   | 0.0  | 0.0   | 0.0  | 0.0   | 0.0 |
| 21UR-91580 | 4.0   | 1.0  | 1.0   | 0.0  | 12.0  | 1.0 |
| 21UR-91590 | 1.0   | 0.0  | 0.0   | 0.0  | 0.0   | 0.0 |
| 21UR-9160  | 24.5  | 4.0  | 10.0  | 1.0  | 4.0   | 1.0 |
| 21UR-91600 | 0.0   | 0.0  | 0.0   | 0.0  | 0.0   | 0.0 |
| 21UR-91610 | 1.0   | 11.0 | 4.0   | 3.0  | 5.0   | 2.0 |
| 21UR-91620 | 0.0   | 0.0  | 0.0   | 0.0  | 0.0   | 0.0 |
| 21UR-91630 | 0.0   | 0.0  | 0.0   | 0.0  | 0.0   | 0.0 |
| 21UR-91640 | 0.0   | 0.0  | 0.0   | 0.0  | 0.0   | 0.0 |
| 21UR-91650 | 0.0   | 0.0  | 0.0   | 0.0  | 0.0   | 0.0 |
| 21UR-91660 | 0.0   | 0.0  | 0.0   | 0.0  | 0.0   | 0.0 |
| 21UR-91670 | 0.0   | 0.0  | 0.0   | 0.0  | 0.0   | 0.0 |
| 21UR-91680 | 4.0   | 0.0  | 0.0   | 0.0  | 0.0   | 0.0 |
| 21UR-91690 | 0.0   | 0.0  | 0.0   | 0.0  | 0.0   | 0.0 |
| 21UR-9170  | 38.0  | 41.0 | 26.0  | 22.0 | 23.0  | 0.0 |
| 21UR-91700 | 0.0   | 1.0  | 0.0   | 0.0  | 6.0   | 0.0 |
| 21UR-91710 | 0.0   | 0.0  | 0.0   | 1.0  | 0.0   | 0.0 |
| 21UR-91720 | 0.0   | 0.0  | 0.0   | 0.0  | 1.0   | 0.0 |
| 21UR-91730 | 131.0 | 46.0 | 133.0 | 60.0 | 286.0 | 4.0 |
| 21UR-91740 | 1.0   | 0.0  | 0.0   | 0.0  | 0.0   | 0.0 |
| 21UR-91750 | 1.0   | 0.0  | 0.0   | 0.0  | 1.0   | 0.0 |
| 21UR-91760 | 0.0   | 0.0  | 0.0   | 0.0  | 0.0   | 0.0 |
| 21UR-91770 | 0.0   | 0.0  | 0.0   | 0.0  | 0.0   | 0.0 |
| 21UR-91780 | 0.0   | 0.0  | 0.0   | 0.0  | 0.0   | 0.0 |
| 21UR-91790 | 0.0   | 0.0  | 0.0   | 0.0  | 0.0   | 0.0 |
| 21UR-9180  | 0.0   | 0.0  | 0.0   | 0.0  | 0.0   | 0.0 |
| 21UR-91800 | 1.0   | 0.0  | 0.0   | 0.0  | 0.0   | 0.0 |
| 21UR-91810 | 0.0   | 0.0  | 1.0   | 0.0  | 0.0   | 0.0 |
| 21UR-91820 | 22.0  | 11.0 | 9.0   | 2.0  | 22.0  | 2.0 |
| 21UR-91830 | 19.0  | 17.0 | 13.0  | 5.0  | 45.0  | 5.0 |
| 21UR-91840 | 0.0   | 0.0  | 0.0   | 0.0  | 0.0   | 0.0 |
| 21UR-91850 | 0.0   | 0.0  | 0.0   | 0.0  | 0.0   | 1.0 |
| 21UR-91860 | 0.0   | 1.0  | 0.0   | 0.0  | 0.0   | 0.0 |
| 21UR-91870 | 0.0   | 4.0  | 1.0   | 0.0  | 4.0   | 0.0 |
| 21UR-91880 | 6.0   | 0.0  | 1.0   | 3.5  | 1.0   | 0.0 |
| 21UR-91890 | 0.0   | 0.0  | 1.0   | 0.0  | 1.0   | 0.0 |
| 21UR-9190  | 1.0   | 0.0  | 0.0   | 0.0  | 0.0   | 0.0 |
| 21UR-91900 | 4.0   | 0.0  | 4.0   | 0.0  | 1.0   | 0.0 |
| 21UR-91910 | 9.0   | 0.0  | 4.0   | 0.0  | 2.0   | 0.0 |
| 21UR-91920 | 0.0   | 0.0  | 1.0   | 0.0  | 0.0   | 0.0 |
| 21UR-91930 | 0.0   | 0.0  | 0.0   | 0.0  | 0.0   | 0.0 |
| 21UR-91940 | 0.0   | 0.0  | 0.0   | 0.0  | 0.0   | 0.0 |
| 21UR-91950 | 49.0  | 10.0 | 15.0  | 6.0  | 4.0   | 2.0 |
| 21UR-91960 | 0.0   | 0.0  | 1.0   | 0.0  | 0.0   | 0.0 |
| 21UR-91970 | 0.0   | 0.0  | 0.0   | 0.0  | 0.0   | 0.0 |



|            |        |       |        |       |       |     |
|------------|--------|-------|--------|-------|-------|-----|
| 21UR-91980 | 1.0    | 0.0   | 1.0    | 1.0   | 0.0   | 0.0 |
| 21UR-91990 | 0.0    | 0.0   | 0.0    | 0.0   | 1.0   | 0.0 |
| 21UR-920   | 7.0    | 0.0   | 8.0    | 0.0   | 0.0   | 0.0 |
| 21UR-9200  | 1645.7 | 102.0 | 1189.0 | 379.4 | 229.8 | 9.0 |
| 21UR-92000 | 23.0   | 11.0  | 13.0   | 2.0   | 14.0  | 3.0 |
| 21UR-92010 | 6.0    | 1.0   | 8.0    | 2.0   | 1.0   | 0.0 |
| 21UR-92020 | 8.0    | 4.0   | 7.0    | 0.0   | 2.0   | 0.0 |
| 21UR-92030 | 4.0    | 0.0   | 0.0    | 0.0   | 5.0   | 0.0 |
| 21UR-92040 | 0.0    | 0.0   | 0.0    | 0.0   | 0.0   | 0.0 |
| 21UR-92050 | 0.0    | 0.0   | 0.0    | 0.0   | 0.0   | 0.0 |
| 21UR-92060 | 13.0   | 15.0  | 24.0   | 1.0   | 42.0  | 0.0 |
| 21UR-92070 | 0.0    | 0.0   | 0.0    | 0.0   | 0.0   | 0.0 |
| 21UR-92080 | 1.0    | 0.0   | 1.0    | 0.0   | 0.0   | 0.0 |
| 21UR-92090 | 0.0    | 0.0   | 0.0    | 0.0   | 0.0   | 0.0 |
| 21UR-9210  | 0.0    | 0.0   | 2.0    | 0.0   | 0.0   | 0.0 |
| 21UR-92100 | 0.0    | 0.0   | 0.0    | 0.0   | 0.0   | 0.0 |
| 21UR-92110 | 0.0    | 0.0   | 6.0    | 0.0   | 0.0   | 0.0 |
| 21UR-92120 | 0.0    | 4.0   | 1.0    | 0.0   | 1.0   | 0.0 |
| 21UR-92130 | 1.0    | 2.3   | 0.0    | 0.0   | 0.0   | 0.0 |
| 21UR-92140 | 0.0    | 0.0   | 0.0    | 0.0   | 0.0   | 0.0 |
| 21UR-92150 | 0.0    | 0.0   | 0.0    | 0.0   | 0.0   | 0.0 |
| 21UR-92160 | 0.0    | 0.0   | 0.0    | 0.0   | 1.0   | 0.0 |
| 21UR-92170 | 0.0    | 0.0   | 0.0    | 0.0   | 0.0   | 0.0 |
| 21UR-92180 | 2.0    | 1.0   | 0.0    | 1.0   | 1.0   | 0.0 |
| 21UR-92190 | 1.0    | 1.0   | 1.0    | 0.0   | 0.0   | 0.0 |
| 21UR-9220  | 0.0    | 0.0   | 0.0    | 0.0   | 0.3   | 0.0 |
| 21UR-92200 | 7.0    | 0.0   | 7.0    | 1.0   | 4.0   | 0.0 |
| 21UR-92210 | 1.0    | 2.0   | 8.0    | 0.0   | 2.0   | 0.0 |
| 21UR-92220 | 0.0    | 0.0   | 0.0    | 0.0   | 0.0   | 0.0 |
| 21UR-92230 | 0.0    | 0.0   | 0.0    | 0.0   | 0.0   | 0.0 |
| 21UR-92240 | 0.0    | 0.0   | 0.0    | 0.0   | 0.0   | 0.0 |
| 21UR-92250 | 0.0    | 0.0   | 0.0    | 1.0   | 0.0   | 0.0 |
| 21UR-92260 | 0.0    | 0.0   | 0.0    | 0.0   | 0.0   | 0.0 |
| 21UR-92270 | 0.0    | 0.0   | 0.0    | 0.0   | 0.0   | 0.0 |
| 21UR-92280 | 1.0    | 4.0   | 0.0    | 0.0   | 9.0   | 0.0 |
| 21UR-92290 | 0.0    | 0.0   | 0.0    | 0.0   | 0.0   | 0.0 |
| 21UR-9230  | 0.0    | 0.0   | 0.0    | 0.0   | 0.0   | 0.0 |
| 21UR-92300 | 0.0    | 0.0   | 0.0    | 0.0   | 0.0   | 0.0 |
| 21UR-92310 | 0.0    | 0.0   | 0.0    | 0.0   | 0.0   | 0.0 |
| 21UR-92320 | 0.0    | 0.0   | 0.0    | 0.0   | 0.0   | 0.0 |
| 21UR-92330 | 0.0    | 0.0   | 0.0    | 0.0   | 1.0   | 0.0 |
| 21UR-92340 | 1.0    | 0.0   | 0.0    | 0.0   | 0.0   | 0.0 |
| 21UR-92350 | 0.0    | 0.0   | 0.0    | 0.0   | 0.0   | 0.0 |
| 21UR-92360 | 0.0    | 0.0   | 0.0    | 0.0   | 0.0   | 0.0 |
| 21UR-92370 | 0.0    | 0.0   | 0.0    | 0.0   | 0.0   | 0.0 |
| 21UR-92380 | 0.0    | 0.0   | 0.0    | 0.0   | 0.0   | 0.0 |
| 21UR-92390 | 10.0   | 0.0   | 16.0   | 4.0   | 9.0   | 1.0 |
| 21UR-9240  | 0.0    | 1.0   | 0.0    | 0.0   | 1.0   | 0.0 |
| 21UR-92400 | 0.0    | 0.0   | 1.0    | 0.0   | 1.0   | 0.0 |
| 21UR-92410 | 0.0    | 0.0   | 0.0    | 0.0   | 1.0   | 0.0 |
| 21UR-92420 | 1.0    | 1.0   | 0.0    | 0.0   | 1.0   | 1.0 |

|            |        |       |        |       |       |      |
|------------|--------|-------|--------|-------|-------|------|
| 21UR-92430 | 1.0    | 1.0   | 1.0    | 0.0   | 1.0   | 1.0  |
| 21UR-92440 | 6.0    | 4.0   | 4.0    | 2.0   | 4.0   | 3.0  |
| 21UR-92450 | 0.0    | 0.0   | 0.0    | 0.0   | 0.0   | 0.0  |
| 21UR-92460 | 1.0    | 3.0   | 0.0    | 0.0   | 3.0   | 0.0  |
| 21UR-92470 | 1.0    | 2.0   | 5.0    | 0.0   | 0.0   | 0.0  |
| 21UR-92480 | 6.0    | 0.0   | 1.0    | 0.0   | 0.0   | 0.0  |
| 21UR-92490 | 1.0    | 0.0   | 0.0    | 0.0   | 0.0   | 0.0  |
| 21UR-9250  | 0.0    | 0.0   | 1.0    | 1.0   | 0.0   | 0.0  |
| 21UR-92500 | 3.0    | 0.0   | 1.0    | 0.0   | 0.0   | 0.0  |
| 21UR-92510 | 0.0    | 0.0   | 1.0    | 0.0   | 0.0   | 0.0  |
| 21UR-92520 | 4.0    | 0.0   | 2.0    | 0.0   | 0.0   | 0.0  |
| 21UR-92530 | 0.0    | 0.0   | 0.0    | 0.0   | 0.0   | 0.0  |
| 21UR-92540 | 4.0    | 2.0   | 2.0    | 0.0   | 0.0   | 0.0  |
| 21UR-92550 | 2.0    | 0.0   | 2.0    | 0.0   | 1.0   | 0.0  |
| 21UR-92560 | 2.0    | 0.0   | 7.0    | 0.0   | 1.0   | 0.0  |
| 21UR-92570 | 0.0    | 0.0   | 0.0    | 0.0   | 0.0   | 0.0  |
| 21UR-92580 | 0.0    | 0.0   | 1.0    | 0.0   | 2.0   | 0.0  |
| 21UR-92590 | 1.0    | 3.0   | 1.0    | 0.0   | 4.0   | 0.0  |
| 21UR-9260  | 55.0   | 3.0   | 30.0   | 20.0  | 1.0   | 0.0  |
| 21UR-92600 | 4.0    | 1.0   | 9.0    | 2.0   | 0.0   | 0.0  |
| 21UR-92610 | 0.0    | 0.0   | 0.0    | 0.0   | 0.0   | 0.0  |
| 21UR-92620 | 4.0    | 1.0   | 8.0    | 0.0   | 1.0   | 1.0  |
| 21UR-92630 | 0.0    | 0.0   | 0.0    | 0.0   | 0.0   | 0.0  |
| 21UR-92640 | 0.0    | 0.0   | 0.0    | 0.0   | 0.0   | 1.0  |
| 21UR-92650 | 0.0    | 0.0   | 0.0    | 0.0   | 0.0   | 0.0  |
| 21UR-92660 | 0.0    | 0.0   | 0.0    | 0.0   | 0.0   | 0.0  |
| 21UR-92670 | 0.0    | 0.0   | 0.0    | 0.0   | 0.0   | 0.0  |
| 21UR-92680 | 0.0    | 0.0   | 0.0    | 0.0   | 0.0   | 0.0  |
| 21UR-92690 | 0.0    | 0.0   | 0.0    | 0.0   | 0.0   | 0.0  |
| 21UR-9270  | 0.0    | 0.0   | 1.0    | 0.0   | 0.0   | 0.0  |
| 21UR-92700 | 0.0    | 0.0   | 0.0    | 0.0   | 0.0   | 0.0  |
| 21UR-92710 | 1.0    | 1.0   | 1.0    | 0.0   | 1.0   | 0.0  |
| 21UR-92720 | 1.0    | 0.0   | 1.0    | 0.0   | 0.0   | 0.0  |
| 21UR-92730 | 209.0  | 51.0  | 163.0  | 102.0 | 65.0  | 4.0  |
| 21UR-92740 | 0.0    | 0.0   | 0.0    | 0.0   | 0.0   | 0.0  |
| 21UR-92750 | 1.0    | 3.0   | 2.0    | 0.0   | 8.0   | 0.0  |
| 21UR-92760 | 21.0   | 2.0   | 9.0    | 4.0   | 8.0   | 1.0  |
| 21UR-92770 | 1.0    | 0.0   | 2.0    | 2.0   | 0.0   | 0.0  |
| 21UR-92780 | 0.0    | 0.0   | 0.0    | 0.0   | 0.0   | 0.0  |
| 21UR-92790 | 4.3    | 4.0   | 6.0    | 1.0   | 3.0   | 0.0  |
| 21UR-9280  | 1494.0 | 92.3  | 1042.8 | 574.0 | 214.5 | 13.0 |
| 21UR-92800 | 0.0    | 0.0   | 0.0    | 0.0   | 0.0   | 0.0  |
| 21UR-92810 | 0.0    | 0.0   | 0.0    | 0.0   | 0.0   | 0.0  |
| 21UR-92820 | 0.0    | 0.0   | 0.0    | 0.0   | 0.0   | 0.0  |
| 21UR-92830 | 0.0    | 0.0   | 0.0    | 0.0   | 0.0   | 0.0  |
| 21UR-92840 | 0.0    | 0.0   | 0.0    | 0.0   | 1.0   | 0.0  |
| 21UR-92850 | 0.0    | 0.0   | 1.0    | 1.0   | 1.0   | 0.0  |
| 21UR-92860 | 0.0    | 0.0   | 0.0    | 0.0   | 0.0   | 0.0  |
| 21UR-92870 | 0.0    | 0.0   | 0.0    | 0.0   | 0.0   | 0.0  |
| 21UR-92880 | 43.0   | 144.0 | 28.0   | 25.0  | 98.0  | 39.0 |
| 21UR-92890 | 0.0    | 0.0   | 0.0    | 0.0   | 0.0   | 0.0  |

|            |       |      |      |      |      |      |
|------------|-------|------|------|------|------|------|
| 21UR-9290  | 19.0  | 1.0  | 14.0 | 4.0  | 1.0  | 0.0  |
| 21UR-92900 | 0.0   | 0.0  | 0.0  | 0.0  | 0.0  | 0.0  |
| 21UR-92910 | 4.0   | 4.0  | 4.0  | 0.0  | 8.0  | 0.0  |
| 21UR-92920 | 0.0   | 0.4  | 0.0  | 0.0  | 0.0  | 1.0  |
| 21UR-92930 | 16.0  | 7.0  | 8.0  | 3.0  | 6.0  | 0.0  |
| 21UR-92940 | 0.0   | 0.0  | 0.0  | 0.0  | 0.0  | 0.0  |
| 21UR-92950 | 6.0   | 0.5  | 5.0  | 4.0  | 0.0  | 0.0  |
| 21UR-92960 | 118.0 | 14.0 | 85.0 | 25.0 | 4.0  | 1.0  |
| 21UR-92970 | 0.0   | 0.0  | 0.0  | 0.0  | 0.0  | 1.0  |
| 21UR-92980 | 5.0   | 7.0  | 9.0  | 0.0  | 27.0 | 0.0  |
| 21UR-92990 | 0.0   | 1.0  | 0.0  | 0.0  | 0.0  | 0.0  |
| 21UR-930   | 65.0  | 59.0 | 60.0 | 14.0 | 68.0 | 10.0 |
| 21UR-9300  | 0.0   | 0.0  | 0.0  | 0.0  | 0.0  | 0.0  |
| 21UR-93000 | 0.0   | 0.0  | 0.0  | 0.0  | 0.0  | 0.0  |
| 21UR-93010 | 0.0   | 0.0  | 0.0  | 0.0  | 0.0  | 0.0  |
| 21UR-93030 | 0.0   | 0.0  | 0.0  | 1.0  | 1.0  | 0.0  |
| 21UR-93040 | 0.0   | 0.0  | 0.0  | 0.0  | 0.0  | 0.0  |
| 21UR-93050 | 0.0   | 2.0  | 2.0  | 0.0  | 0.0  | 0.0  |
| 21UR-93060 | 0.0   | 0.0  | 0.0  | 0.0  | 0.0  | 0.0  |
| 21UR-93070 | 0.0   | 0.0  | 0.0  | 0.0  | 0.0  | 0.0  |
| 21UR-93080 | 0.0   | 0.0  | 0.0  | 0.0  | 0.0  | 0.0  |
| 21UR-93090 | 0.0   | 0.0  | 0.0  | 0.0  | 0.0  | 0.0  |
| 21UR-9310  | 2.0   | 8.0  | 8.0  | 8.0  | 13.0 | 1.0  |
| 21UR-93100 | 0.0   | 0.0  | 0.0  | 0.0  | 0.0  | 0.0  |
| 21UR-93110 | 0.0   | 0.0  | 0.0  | 0.0  | 0.0  | 0.0  |
| 21UR-93120 | 0.0   | 1.0  | 0.0  | 0.0  | 0.0  | 1.0  |
| 21UR-93130 | 0.0   | 0.0  | 0.0  | 0.0  | 0.0  | 0.0  |
| 21UR-93140 | 0.0   | 0.0  | 0.0  | 0.0  | 0.0  | 0.0  |
| 21UR-93150 | 0.0   | 0.0  | 0.0  | 0.0  | 0.0  | 0.0  |
| 21UR-93160 | 0.0   | 4.0  | 0.0  | 0.0  | 1.0  | 1.0  |
| 21UR-93170 | 2.0   | 11.0 | 12.0 | 2.0  | 19.0 | 2.0  |
| 21UR-93180 | 0.0   | 0.0  | 0.0  | 0.0  | 0.0  | 0.0  |
| 21UR-93190 | 0.0   | 0.0  | 0.0  | 0.0  | 0.0  | 0.0  |
| 21UR-9320  | 1.0   | 5.0  | 1.0  | 0.0  | 1.0  | 0.0  |
| 21UR-93200 | 0.0   | 0.0  | 0.0  | 0.0  | 0.0  | 0.0  |
| 21UR-93210 | 0.0   | 0.0  | 0.0  | 0.0  | 0.0  | 0.0  |
| 21UR-93220 | 0.0   | 0.0  | 0.0  | 0.0  | 0.0  | 0.0  |
| 21UR-93230 | 0.0   | 0.0  | 0.0  | 0.0  | 0.0  | 0.0  |
| 21UR-93240 | 0.0   | 1.0  | 0.0  | 0.0  | 0.0  | 0.0  |
| 21UR-93250 | 0.0   | 0.0  | 0.0  | 0.0  | 0.0  | 0.0  |
| 21UR-93260 | 0.0   | 1.0  | 0.0  | 0.0  | 0.0  | 0.0  |
| 21UR-93270 | 0.0   | 0.0  | 0.0  | 0.0  | 0.0  | 0.0  |
| 21UR-93280 | 0.0   | 0.0  | 1.0  | 1.0  | 0.0  | 0.0  |
| 21UR-93290 | 8.0   | 2.0  | 17.0 | 0.0  | 1.0  | 0.0  |
| 21UR-9330  | 4.0   | 12.0 | 6.0  | 0.0  | 1.0  | 0.0  |
| 21UR-93300 | 0.0   | 0.0  | 0.0  | 0.0  | 0.0  | 0.0  |
| 21UR-93310 | 1.0   | 4.0  | 0.0  | 0.0  | 2.0  | 0.0  |
| 21UR-93320 | 0.0   | 0.0  | 1.0  | 0.0  | 0.0  | 0.0  |
| 21UR-93330 | 6.0   | 1.0  | 4.0  | 0.0  | 0.0  | 1.0  |
| 21UR-93340 | 16.0  | 0.0  | 19.0 | 3.0  | 0.0  | 0.0  |
| 21UR-93350 | 0.0   | 0.0  | 0.0  | 0.0  | 0.0  | 0.0  |

|            |      |      |      |     |      |     |
|------------|------|------|------|-----|------|-----|
| 21UR-93360 | 0.0  | 0.0  | 0.0  | 0.0 | 0.0  | 0.0 |
| 21UR-93370 | 0.0  | 0.0  | 0.0  | 0.0 | 0.0  | 0.0 |
| 21UR-93380 | 1.0  | 1.0  | 1.0  | 1.0 | 0.0  | 0.0 |
| 21UR-93390 | 8.0  | 9.0  | 5.0  | 1.0 | 24.0 | 1.0 |
| 21UR-9340  | 0.0  | 0.0  | 0.0  | 0.0 | 1.0  | 0.0 |
| 21UR-93400 | 0.0  | 0.0  | 0.0  | 0.0 | 0.0  | 0.0 |
| 21UR-93410 | 0.0  | 0.0  | 0.0  | 0.0 | 0.0  | 0.0 |
| 21UR-93430 | 0.0  | 0.0  | 0.0  | 0.0 | 0.0  | 0.0 |
| 21UR-93440 | 0.0  | 0.0  | 0.0  | 0.0 | 0.0  | 0.0 |
| 21UR-93450 | 0.0  | 1.0  | 4.0  | 0.0 | 0.0  | 0.0 |
| 21UR-93460 | 0.0  | 0.0  | 1.0  | 0.0 | 0.0  | 0.0 |
| 21UR-93470 | 0.0  | 0.0  | 0.0  | 0.0 | 0.0  | 0.0 |
| 21UR-93480 | 0.0  | 0.0  | 0.0  | 0.0 | 0.0  | 0.0 |
| 21UR-93490 | 1.0  | 0.0  | 1.0  | 0.0 | 0.0  | 0.0 |
| 21UR-9350  | 0.0  | 0.0  | 4.0  | 0.0 | 1.0  | 0.0 |
| 21UR-93500 | 4.0  | 0.0  | 4.0  | 4.0 | 0.0  | 0.0 |
| 21UR-93520 | 0.0  | 0.0  | 0.0  | 0.0 | 1.0  | 0.0 |
| 21UR-93530 | 0.0  | 0.0  | 0.0  | 0.0 | 0.0  | 0.0 |
| 21UR-93540 | 0.0  | 0.0  | 0.0  | 0.0 | 0.0  | 0.0 |
| 21UR-93550 | 0.0  | 0.0  | 0.0  | 0.0 | 0.0  | 0.0 |
| 21UR-93560 | 0.0  | 0.0  | 2.0  | 0.0 | 0.0  | 0.0 |
| 21UR-93570 | 1.0  | 0.0  | 0.0  | 0.0 | 0.0  | 0.0 |
| 21UR-93580 | 1.0  | 1.0  | 1.0  | 0.0 | 8.0  | 1.0 |
| 21UR-93590 | 0.0  | 0.0  | 0.0  | 0.0 | 0.0  | 0.0 |
| 21UR-9360  | 0.0  | 0.0  | 0.0  | 0.0 | 0.0  | 0.0 |
| 21UR-93600 | 0.0  | 0.0  | 0.0  | 0.0 | 0.0  | 0.0 |
| 21UR-93610 | 0.0  | 0.0  | 1.0  | 0.0 | 0.0  | 0.0 |
| 21UR-93620 | 0.0  | 0.0  | 0.0  | 0.0 | 0.0  | 0.0 |
| 21UR-93630 | 21.0 | 5.0  | 21.5 | 9.0 | 1.0  | 2.0 |
| 21UR-93640 | 0.0  | 0.0  | 0.0  | 0.0 | 0.0  | 0.0 |
| 21UR-93650 | 0.0  | 0.0  | 0.0  | 0.0 | 0.0  | 0.0 |
| 21UR-93660 | 0.0  | 0.0  | 0.0  | 0.0 | 0.0  | 0.0 |
| 21UR-93670 | 0.0  | 0.0  | 0.0  | 0.0 | 0.0  | 0.0 |
| 21UR-93680 | 0.0  | 0.0  | 0.0  | 0.0 | 0.0  | 0.0 |
| 21UR-93690 | 3.0  | 2.0  | 0.0  | 1.0 | 0.0  | 0.0 |
| 21UR-9370  | 3.0  | 1.0  | 1.0  | 6.0 | 0.0  | 0.0 |
| 21UR-93700 | 1.0  | 5.0  | 0.0  | 1.0 | 1.0  | 0.0 |
| 21UR-93710 | 0.0  | 0.0  | 0.0  | 0.0 | 0.0  | 0.0 |
| 21UR-93720 | 0.0  | 0.0  | 0.0  | 0.0 | 0.0  | 0.0 |
| 21UR-93730 | 0.0  | 0.0  | 0.0  | 0.0 | 0.0  | 0.0 |
| 21UR-93740 | 0.0  | 0.0  | 0.0  | 0.0 | 0.0  | 0.0 |
| 21UR-93750 | 28.0 | 11.0 | 24.0 | 4.0 | 23.0 | 1.0 |
| 21UR-93760 | 0.0  | 0.0  | 0.0  | 0.0 | 0.0  | 0.0 |
| 21UR-93770 | 0.0  | 2.0  | 1.0  | 0.0 | 1.0  | 0.0 |
| 21UR-93780 | 0.0  | 0.0  | 0.0  | 0.0 | 0.0  | 0.0 |
| 21UR-93790 | 0.0  | 0.0  | 1.0  | 0.0 | 0.0  | 0.0 |
| 21UR-9380  | 0.0  | 2.0  | 1.0  | 0.0 | 0.0  | 0.0 |
| 21UR-93800 | 0.0  | 0.0  | 0.0  | 0.0 | 0.0  | 0.0 |
| 21UR-93810 | 1.0  | 0.0  | 0.0  | 0.0 | 0.0  | 0.0 |
| 21UR-93820 | 0.0  | 0.0  | 0.0  | 0.0 | 0.0  | 0.0 |
| 21UR-93830 | 0.0  | 0.0  | 0.0  | 0.0 | 0.0  | 0.0 |

|            |       |       |       |       |      |      |
|------------|-------|-------|-------|-------|------|------|
| 21UR-93840 | 0.0   | 0.0   | 0.0   | 0.0   | 0.0  | 0.0  |
| 21UR-93850 | 0.0   | 0.0   | 0.0   | 0.0   | 1.0  | 0.0  |
| 21UR-93860 | 0.0   | 0.0   | 0.0   | 0.0   | 0.0  | 0.0  |
| 21UR-93870 | 1.0   | 1.0   | 1.0   | 3.0   | 0.0  | 0.0  |
| 21UR-93880 | 0.0   | 3.0   | 0.0   | 0.0   | 1.0  | 4.0  |
| 21UR-93890 | 0.0   | 0.0   | 0.0   | 0.0   | 0.0  | 0.0  |
| 21UR-9390  | 0.0   | 1.0   | 0.0   | 0.0   | 1.0  | 0.0  |
| 21UR-93900 | 6.0   | 11.0  | 8.0   | 1.0   | 21.0 | 2.0  |
| 21UR-93910 | 0.0   | 0.0   | 0.0   | 0.0   | 0.0  | 0.0  |
| 21UR-93920 | 1.0   | 0.0   | 5.0   | 0.0   | 0.0  | 0.0  |
| 21UR-93930 | 0.0   | 0.0   | 0.0   | 0.0   | 0.0  | 0.0  |
| 21UR-93940 | 2.0   | 0.0   | 1.0   | 0.0   | 0.0  | 0.0  |
| 21UR-93950 | 0.0   | 0.0   | 0.0   | 0.0   | 1.0  | 0.0  |
| 21UR-93960 | 0.0   | 0.0   | 0.0   | 0.0   | 0.0  | 0.0  |
| 21UR-93970 | 1.0   | 0.0   | 0.0   | 0.0   | 0.0  | 0.0  |
| 21UR-93980 | 0.0   | 1.0   | 2.0   | 3.0   | 3.0  | 0.0  |
| 21UR-93990 | 0.0   | 1.0   | 1.0   | 1.0   | 2.0  | 0.0  |
| 21UR-940   | 17.0  | 15.0  | 21.0  | 12.0  | 12.5 | 8.0  |
| 21UR-9400  | 0.0   | 0.0   | 0.0   | 0.0   | 0.0  | 0.0  |
| 21UR-94000 | 0.0   | 0.0   | 0.0   | 0.0   | 0.0  | 0.0  |
| 21UR-94020 | 0.0   | 0.0   | 0.0   | 0.0   | 0.0  | 0.0  |
| 21UR-94030 | 0.0   | 0.0   | 0.0   | 0.0   | 0.0  | 0.0  |
| 21UR-94040 | 1.0   | 0.0   | 0.0   | 0.0   | 0.0  | 0.0  |
| 21UR-94050 | 0.0   | 0.0   | 0.0   | 0.0   | 0.0  | 0.0  |
| 21UR-94070 | 32.0  | 4.0   | 27.0  | 7.7   | 2.0  | 0.0  |
| 21UR-94080 | 2.0   | 0.0   | 0.0   | 0.0   | 0.0  | 0.0  |
| 21UR-94090 | 0.0   | 0.0   | 0.0   | 0.0   | 0.0  | 0.0  |
| 21UR-9410  | 1.0   | 0.0   | 0.0   | 0.0   | 0.0  | 0.0  |
| 21UR-94100 | 0.0   | 0.0   | 0.0   | 0.0   | 0.0  | 0.0  |
| 21UR-94110 | 2.0   | 2.0   | 8.0   | 1.0   | 2.0  | 0.0  |
| 21UR-94120 | 20.0  | 5.0   | 37.0  | 5.0   | 15.0 | 0.0  |
| 21UR-94130 | 0.0   | 0.0   | 0.0   | 0.0   | 0.0  | 0.0  |
| 21UR-94140 | 137.0 | 17.0  | 119.0 | 63.0  | 80.0 | 4.0  |
| 21UR-94150 | 0.0   | 0.0   | 0.0   | 0.0   | 0.0  | 0.0  |
| 21UR-94160 | 2.0   | 0.0   | 1.0   | 0.0   | 0.0  | 0.0  |
| 21UR-94170 | 0.0   | 0.0   | 0.0   | 0.0   | 0.0  | 0.0  |
| 21UR-94180 | 0.0   | 0.0   | 0.0   | 0.0   | 1.0  | 0.0  |
| 21UR-94190 | 0.0   | 0.0   | 0.0   | 0.0   | 0.0  | 0.0  |
| 21UR-9420  | 0.0   | 0.0   | 0.0   | 0.0   | 0.0  | 0.0  |
| 21UR-94200 | 0.0   | 0.0   | 1.0   | 0.0   | 0.0  | 0.0  |
| 21UR-94220 | 0.0   | 5.0   | 1.0   | 2.0   | 2.0  | 0.0  |
| 21UR-94230 | 0.0   | 0.1   | 0.0   | 0.0   | 0.0  | 0.0  |
| 21UR-94240 | 402.8 | 195.0 | 327.5 | 123.5 | 85.5 | 27.0 |
| 21UR-94250 | 17.0  | 1.0   | 6.0   | 4.0   | 1.0  | 0.0  |
| 21UR-94260 | 0.0   | 0.0   | 1.0   | 0.0   | 1.0  | 0.0  |
| 21UR-94270 | 0.0   | 0.0   | 0.0   | 0.0   | 0.0  | 0.0  |
| 21UR-94280 | 0.0   | 0.0   | 0.0   | 0.0   | 0.0  | 0.0  |
| 21UR-94290 | 0.0   | 0.0   | 0.0   | 0.0   | 0.0  | 0.0  |
| 21UR-9430  | 0.0   | 1.0   | 0.0   | 0.0   | 0.0  | 0.0  |
| 21UR-94300 | 0.0   | 0.0   | 0.0   | 0.0   | 1.0  | 1.0  |
| 21UR-94310 | 6.0   | 4.0   | 1.0   | 0.0   | 4.0  | 0.0  |

|            |      |     |      |     |     |     |
|------------|------|-----|------|-----|-----|-----|
| 21UR-94320 | 0.0  | 0.0 | 0.0  | 0.0 | 0.0 | 0.0 |
| 21UR-94330 | 0.0  | 0.0 | 0.0  | 0.0 | 0.0 | 0.0 |
| 21UR-94340 | 15.0 | 2.0 | 13.0 | 6.0 | 6.0 | 2.0 |
| 21UR-94350 | 0.0  | 0.0 | 0.0  | 0.0 | 0.0 | 0.0 |
| 21UR-94360 | 1.0  | 1.0 | 2.0  | 0.0 | 2.0 | 1.0 |
| 21UR-94370 | 0.0  | 0.0 | 0.0  | 0.0 | 0.0 | 0.0 |
| 21UR-94380 | 0.0  | 0.0 | 0.0  | 0.0 | 0.0 | 0.0 |
| 21UR-94390 | 11.0 | 8.6 | 7.0  | 5.0 | 8.0 | 0.0 |
| 21UR-9440  | 43.0 | 2.0 | 40.0 | 6.0 | 1.0 | 0.0 |
| 21UR-94400 | 1.0  | 0.0 | 0.0  | 0.0 | 0.0 | 0.0 |
| 21UR-94410 | 0.0  | 1.0 | 0.0  | 0.0 | 0.0 | 1.0 |
| 21UR-94420 | 0.0  | 0.0 | 0.0  | 0.0 | 0.0 | 0.0 |
| 21UR-94430 | 0.0  | 0.0 | 0.0  | 0.0 | 0.0 | 0.0 |
| 21UR-94440 | 0.0  | 0.0 | 0.0  | 0.0 | 0.0 | 0.1 |
| 21UR-94450 | 1.0  | 0.0 | 1.0  | 0.0 | 0.0 | 0.0 |
| 21UR-94460 | 0.0  | 0.0 | 6.0  | 0.0 | 1.0 | 0.0 |
| 21UR-94470 | 0.0  | 0.0 | 0.0  | 0.0 | 0.0 | 0.0 |
| 21UR-94480 | 0.0  | 0.0 | 0.0  | 0.0 | 0.0 | 0.0 |
| 21UR-94490 | 0.0  | 0.0 | 0.0  | 0.0 | 0.0 | 0.0 |
| 21UR-9450  | 14.0 | 6.0 | 4.0  | 1.0 | 8.0 | 1.0 |
| 21UR-94500 | 0.0  | 0.0 | 1.0  | 0.0 | 0.0 | 0.0 |
| 21UR-94510 | 0.0  | 0.0 | 0.0  | 0.0 | 0.0 | 0.0 |
| 21UR-94520 | 0.0  | 0.0 | 0.0  | 0.0 | 0.0 | 0.0 |
| 21UR-94530 | 0.0  | 0.0 | 0.0  | 0.0 | 0.0 | 0.0 |
| 21UR-94540 | 0.0  | 0.0 | 0.0  | 0.0 | 0.0 | 0.0 |
| 21UR-94550 | 0.0  | 0.0 | 0.0  | 0.0 | 0.0 | 0.0 |
| 21UR-94560 | 9.0  | 4.0 | 4.0  | 2.0 | 8.0 | 0.0 |
| 21UR-94570 | 0.0  | 0.0 | 0.0  | 0.0 | 0.0 | 0.0 |
| 21UR-94580 | 0.0  | 0.0 | 0.0  | 0.0 | 0.0 | 0.0 |
| 21UR-94590 | 1.0  | 0.0 | 0.0  | 0.0 | 1.0 | 0.1 |
| 21UR-9460  | 14.0 | 0.0 | 16.0 | 2.0 | 0.0 | 0.0 |
| 21UR-94600 | 0.0  | 0.0 | 0.0  | 0.0 | 0.0 | 0.0 |
| 21UR-94610 | 0.0  | 0.0 | 0.0  | 0.0 | 0.0 | 0.0 |
| 21UR-94620 | 3.8  | 2.0 | 3.0  | 2.0 | 0.0 | 1.5 |
| 21UR-94630 | 0.0  | 0.0 | 0.0  | 0.0 | 0.0 | 0.0 |
| 21UR-94640 | 0.0  | 0.0 | 0.0  | 0.0 | 0.0 | 0.0 |
| 21UR-94650 | 0.0  | 0.0 | 0.0  | 0.0 | 0.0 | 0.0 |
| 21UR-94660 | 0.0  | 0.0 | 0.0  | 0.0 | 0.0 | 0.0 |
| 21UR-94670 | 5.0  | 2.0 | 2.0  | 1.0 | 1.0 | 0.0 |
| 21UR-94680 | 0.0  | 0.0 | 0.0  | 0.0 | 1.0 | 0.0 |
| 21UR-94690 | 0.0  | 0.0 | 0.0  | 1.0 | 0.0 | 0.0 |
| 21UR-9470  | 0.0  | 1.5 | 2.0  | 0.0 | 1.0 | 0.0 |
| 21UR-94700 | 15.0 | 2.0 | 9.0  | 3.0 | 2.0 | 0.0 |
| 21UR-94710 | 0.0  | 0.0 | 0.0  | 0.0 | 0.0 | 0.0 |
| 21UR-94720 | 0.0  | 0.0 | 0.0  | 0.0 | 0.0 | 0.0 |
| 21UR-94730 | 0.0  | 0.0 | 0.0  | 0.0 | 1.0 | 0.0 |
| 21UR-94740 | 0.0  | 0.0 | 0.0  | 0.0 | 0.0 | 0.0 |
| 21UR-94750 | 0.0  | 0.0 | 0.0  | 0.0 | 0.0 | 0.0 |
| 21UR-94760 | 0.0  | 0.0 | 0.0  | 0.0 | 0.0 | 0.0 |
| 21UR-94780 | 0.0  | 0.0 | 1.0  | 0.0 | 0.0 | 0.0 |
| 21UR-94790 | 0.0  | 1.0 | 1.0  | 0.0 | 0.0 | 0.0 |

|            |       |      |      |      |      |     |
|------------|-------|------|------|------|------|-----|
| 21UR-9480  | 10.0  | 0.0  | 6.0  | 1.0  | 6.0  | 0.0 |
| 21UR-94800 | 0.0   | 0.0  | 0.0  | 0.0  | 0.0  | 0.0 |
| 21UR-94810 | 42.0  | 5.0  | 34.5 | 10.0 | 4.0  | 4.0 |
| 21UR-94820 | 0.0   | 0.0  | 0.0  | 0.0  | 0.0  | 0.0 |
| 21UR-94830 | 0.0   | 0.0  | 0.0  | 1.0  | 1.0  | 0.0 |
| 21UR-94840 | 0.0   | 0.0  | 0.0  | 0.0  | 1.0  | 0.0 |
| 21UR-94850 | 0.0   | 0.0  | 0.0  | 0.0  | 0.0  | 0.0 |
| 21UR-94860 | 0.0   | 0.0  | 0.0  | 0.0  | 0.0  | 0.0 |
| 21UR-94870 | 0.0   | 0.0  | 0.0  | 0.0  | 0.0  | 0.0 |
| 21UR-94880 | 11.0  | 4.0  | 3.0  | 3.0  | 5.0  | 0.0 |
| 21UR-94890 | 4.0   | 0.0  | 2.0  | 0.0  | 0.0  | 0.0 |
| 21UR-9490  | 0.0   | 0.0  | 0.0  | 0.0  | 0.0  | 0.0 |
| 21UR-94900 | 0.0   | 0.0  | 0.0  | 0.0  | 0.0  | 0.0 |
| 21UR-94910 | 0.0   | 0.0  | 0.0  | 0.0  | 0.0  | 0.0 |
| 21UR-94920 | 0.0   | 1.0  | 1.0  | 0.0  | 0.0  | 0.0 |
| 21UR-94930 | 14.0  | 22.0 | 14.0 | 3.0  | 9.0  | 2.0 |
| 21UR-94940 | 1.0   | 4.0  | 2.0  | 1.0  | 2.0  | 0.0 |
| 21UR-94950 | 0.0   | 0.0  | 0.0  | 0.0  | 0.0  | 0.0 |
| 21UR-94960 | 123.0 | 18.0 | 61.0 | 35.0 | 39.2 | 4.0 |
| 21UR-94970 | 23.0  | 4.0  | 20.0 | 3.0  | 8.0  | 0.0 |
| 21UR-94980 | 0.0   | 0.5  | 0.0  | 0.0  | 0.0  | 0.0 |
| 21UR-94990 | 0.0   | 0.0  | 0.0  | 1.0  | 0.0  | 0.0 |
| 21UR-950   | 0.0   | 0.0  | 0.0  | 0.0  | 0.0  | 0.0 |
| 21UR-9500  | 1.0   | 0.0  | 0.0  | 0.0  | 0.0  | 0.0 |
| 21UR-95000 | 0.0   | 0.0  | 0.0  | 0.0  | 0.0  | 0.0 |
| 21UR-95010 | 7.0   | 0.0  | 4.0  | 0.0  | 5.0  | 0.0 |
| 21UR-95020 | 1.0   | 0.0  | 0.0  | 0.0  | 0.0  | 0.0 |
| 21UR-95030 | 0.0   | 0.0  | 0.0  | 0.0  | 0.0  | 0.0 |
| 21UR-95040 | 0.0   | 0.0  | 0.0  | 0.0  | 1.0  | 0.0 |
| 21UR-95050 | 0.0   | 0.0  | 0.0  | 0.0  | 0.0  | 0.0 |
| 21UR-95060 | 1.0   | 0.0  | 0.0  | 0.0  | 0.0  | 0.0 |
| 21UR-95070 | 7.0   | 3.0  | 8.0  | 8.0  | 1.0  | 1.0 |
| 21UR-95090 | 0.0   | 0.0  | 0.0  | 0.0  | 0.0  | 0.0 |
| 21UR-95100 | 9.0   | 3.0  | 8.0  | 5.0  | 13.0 | 1.0 |
| 21UR-95110 | 0.0   | 0.0  | 0.0  | 0.0  | 0.0  | 0.0 |
| 21UR-95120 | 1.0   | 4.0  | 2.0  | 1.0  | 4.0  | 1.0 |
| 21UR-95130 | 0.0   | 0.0  | 1.0  | 0.0  | 1.0  | 1.0 |
| 21UR-95140 | 0.0   | 0.0  | 0.0  | 0.0  | 0.0  | 0.0 |
| 21UR-95150 | 0.0   | 0.0  | 1.0  | 0.0  | 1.0  | 0.0 |
| 21UR-95160 | 0.0   | 0.0  | 0.0  | 0.0  | 0.0  | 0.0 |
| 21UR-95170 | 0.0   | 0.0  | 0.0  | 0.0  | 0.0  | 0.0 |
| 21UR-95180 | 0.0   | 0.0  | 0.0  | 0.0  | 1.0  | 0.0 |
| 21UR-95190 | 0.0   | 0.0  | 0.0  | 0.0  | 0.0  | 0.0 |
| 21UR-9520  | 0.0   | 0.0  | 0.0  | 0.0  | 0.0  | 0.0 |
| 21UR-95200 | 0.0   | 0.0  | 0.0  | 1.0  | 1.0  | 1.0 |
| 21UR-95210 | 97.0  | 6.0  | 72.0 | 21.0 | 45.2 | 6.0 |
| 21UR-95220 | 1.0   | 0.0  | 0.0  | 0.0  | 0.0  | 0.0 |
| 21UR-95230 | 0.0   | 0.0  | 0.0  | 0.0  | 0.0  | 0.0 |
| 21UR-95240 | 0.0   | 0.0  | 0.0  | 0.0  | 0.0  | 0.0 |
| 21UR-95250 | 0.0   | 0.0  | 0.0  | 0.0  | 0.0  | 0.0 |
| 21UR-95260 | 0.0   | 0.0  | 0.0  | 0.0  | 4.0  | 0.0 |

|            |       |      |       |      |      |     |
|------------|-------|------|-------|------|------|-----|
| 21UR-95270 | 2.0   | 9.5  | 1.0   | 1.0  | 1.0  | 1.0 |
| 21UR-95280 | 0.0   | 0.0  | 0.0   | 0.0  | 0.0  | 0.0 |
| 21UR-95290 | 0.0   | 0.0  | 0.0   | 0.0  | 1.0  | 0.0 |
| 21UR-9530  | 1.0   | 0.0  | 0.0   | 0.0  | 0.0  | 0.0 |
| 21UR-95300 | 0.0   | 0.0  | 0.0   | 0.0  | 0.0  | 0.0 |
| 21UR-95310 | 0.0   | 0.0  | 0.0   | 0.0  | 0.0  | 0.0 |
| 21UR-95320 | 0.0   | 0.0  | 0.0   | 0.0  | 0.0  | 0.0 |
| 21UR-95330 | 1.0   | 0.0  | 1.0   | 1.0  | 3.0  | 0.0 |
| 21UR-95340 | 0.0   | 0.0  | 0.0   | 0.0  | 0.0  | 0.0 |
| 21UR-95350 | 0.0   | 0.0  | 1.0   | 0.0  | 0.0  | 0.0 |
| 21UR-95360 | 0.0   | 0.0  | 0.0   | 0.0  | 0.0  | 0.0 |
| 21UR-95370 | 0.0   | 0.0  | 0.0   | 0.0  | 0.0  | 0.0 |
| 21UR-95380 | 0.0   | 0.0  | 0.0   | 0.0  | 0.0  | 0.0 |
| 21UR-95390 | 0.0   | 0.0  | 0.0   | 0.0  | 0.0  | 0.0 |
| 21UR-9540  | 1.0   | 0.0  | 0.0   | 0.0  | 0.0  | 0.0 |
| 21UR-95400 | 4.0   | 0.0  | 0.0   | 0.0  | 0.0  | 0.0 |
| 21UR-95410 | 0.0   | 0.0  | 0.0   | 0.0  | 0.0  | 0.0 |
| 21UR-95420 | 1.0   | 0.0  | 0.0   | 0.0  | 0.0  | 0.0 |
| 21UR-95430 | 0.0   | 0.0  | 0.0   | 0.0  | 0.0  | 0.0 |
| 21UR-95440 | 0.0   | 0.0  | 0.0   | 0.0  | 0.0  | 0.0 |
| 21UR-95450 | 1.0   | 0.0  | 4.0   | 0.0  | 0.0  | 0.0 |
| 21UR-95460 | 0.0   | 0.0  | 6.0   | 0.0  | 1.0  | 0.0 |
| 21UR-95470 | 1.0   | 1.0  | 0.0   | 0.0  | 0.0  | 0.0 |
| 21UR-95480 | 1.0   | 0.0  | 0.0   | 0.0  | 0.0  | 0.0 |
| 21UR-95490 | 0.0   | 1.0  | 1.0   | 2.0  | 0.0  | 0.0 |
| 21UR-9550  | 0.0   | 0.0  | 0.0   | 0.0  | 0.0  | 0.0 |
| 21UR-95500 | 4.0   | 4.0  | 5.0   | 2.0  | 5.0  | 2.0 |
| 21UR-95510 | 0.0   | 0.0  | 0.0   | 0.0  | 0.0  | 0.0 |
| 21UR-95520 | 0.0   | 0.0  | 0.0   | 0.0  | 0.0  | 0.0 |
| 21UR-95530 | 113.0 | 34.0 | 130.0 | 42.0 | 35.0 | 3.0 |
| 21UR-95540 | 0.0   | 0.0  | 0.0   | 0.0  | 0.0  | 0.0 |
| 21UR-95550 | 0.0   | 0.0  | 0.0   | 0.0  | 0.0  | 0.0 |
| 21UR-95560 | 0.0   | 0.0  | 0.0   | 0.0  | 2.0  | 0.0 |
| 21UR-95570 | 0.0   | 0.0  | 0.0   | 0.0  | 0.0  | 0.0 |
| 21UR-95580 | 0.0   | 0.0  | 0.0   | 0.0  | 1.0  | 0.0 |
| 21UR-95590 | 0.0   | 0.0  | 0.0   | 0.0  | 0.0  | 0.0 |
| 21UR-9560  | 0.0   | 0.0  | 0.0   | 0.0  | 0.0  | 0.0 |
| 21UR-95600 | 0.0   | 1.0  | 0.0   | 0.0  | 0.0  | 0.0 |
| 21UR-95610 | 0.0   | 0.0  | 1.0   | 1.0  | 7.0  | 0.0 |
| 21UR-95630 | 0.0   | 0.0  | 0.0   | 0.0  | 0.0  | 0.0 |
| 21UR-95640 | 0.0   | 1.0  | 0.0   | 0.0  | 0.0  | 0.0 |
| 21UR-95650 | 0.0   | 0.0  | 0.0   | 0.0  | 0.0  | 0.0 |
| 21UR-95660 | 5.0   | 3.0  | 5.0   | 2.0  | 0.0  | 1.0 |
| 21UR-95670 | 0.0   | 3.1  | 1.0   | 0.0  | 5.0  | 0.0 |
| 21UR-95680 | 0.0   | 0.0  | 0.0   | 0.0  | 0.0  | 0.0 |
| 21UR-95690 | 1.0   | 0.0  | 0.0   | 0.0  | 0.0  | 0.0 |
| 21UR-9570  | 1.0   | 1.0  | 6.0   | 1.0  | 0.0  | 0.0 |
| 21UR-95700 | 0.0   | 0.0  | 0.0   | 0.0  | 0.0  | 0.0 |
| 21UR-95710 | 1.0   | 0.0  | 0.0   | 0.0  | 0.0  | 0.0 |
| 21UR-95720 | 0.0   | 0.0  | 1.0   | 4.0  | 1.0  | 1.0 |
| 21UR-95730 | 0.0   | 0.0  | 0.0   | 0.0  | 0.0  | 0.0 |



|            |       |      |       |      |      |     |
|------------|-------|------|-------|------|------|-----|
| 21UR-95740 | 0.0   | 0.0  | 0.0   | 0.0  | 0.0  | 0.0 |
| 21UR-95750 | 0.0   | 0.0  | 0.0   | 1.0  | 0.0  | 0.0 |
| 21UR-95760 | 0.0   | 9.0  | 1.0   | 0.0  | 30.0 | 2.0 |
| 21UR-95770 | 4.0   | 2.0  | 2.0   | 1.0  | 1.0  | 0.0 |
| 21UR-95780 | 0.0   | 0.0  | 0.0   | 0.0  | 0.0  | 0.0 |
| 21UR-95790 | 0.0   | 0.0  | 0.0   | 0.0  | 0.1  | 0.0 |
| 21UR-9580  | 1.0   | 1.0  | 1.0   | 0.0  | 6.0  | 0.0 |
| 21UR-95800 | 0.0   | 0.0  | 0.0   | 0.0  | 0.0  | 0.0 |
| 21UR-95810 | 0.0   | 0.0  | 0.0   | 0.0  | 0.0  | 0.0 |
| 21UR-95820 | 0.0   | 0.0  | 0.0   | 0.0  | 0.0  | 0.0 |
| 21UR-95830 | 1.0   | 0.0  | 1.0   | 0.0  | 0.0  | 0.0 |
| 21UR-95840 | 4.0   | 4.0  | 7.0   | 0.0  | 3.0  | 0.0 |
| 21UR-95860 | 0.0   | 0.0  | 0.0   | 0.0  | 0.0  | 0.0 |
| 21UR-95870 | 0.0   | 0.0  | 0.0   | 0.0  | 0.0  | 0.0 |
| 21UR-95880 | 0.0   | 0.0  | 0.0   | 0.0  | 0.0  | 0.0 |
| 21UR-95890 | 0.0   | 1.0  | 1.0   | 0.0  | 1.0  | 0.0 |
| 21UR-9590  | 1.0   | 0.0  | 1.0   | 0.0  | 0.0  | 0.0 |
| 21UR-95900 | 1.5   | 0.0  | 1.0   | 1.0  | 0.0  | 0.0 |
| 21UR-95920 | 0.0   | 0.0  | 0.0   | 0.0  | 0.0  | 0.0 |
| 21UR-95930 | 1.0   | 0.0  | 0.0   | 0.0  | 0.0  | 0.0 |
| 21UR-95940 | 0.0   | 0.0  | 0.0   | 0.0  | 0.0  | 0.0 |
| 21UR-95950 | 1.0   | 4.0  | 1.0   | 0.0  | 1.0  | 1.0 |
| 21UR-95960 | 327.0 | 6.0  | 299.0 | 36.0 | 11.0 | 4.0 |
| 21UR-95970 | 2.0   | 2.0  | 5.0   | 1.0  | 3.0  | 0.0 |
| 21UR-95980 | 0.0   | 0.0  | 0.0   | 0.0  | 0.0  | 0.0 |
| 21UR-95990 | 0.0   | 0.0  | 0.0   | 0.0  | 0.0  | 0.0 |
| 21UR-960   | 2.0   | 18.0 | 1.0   | 1.0  | 26.0 | 0.0 |
| 21UR-9600  | 4.0   | 3.0  | 7.0   | 1.0  | 6.0  | 0.0 |
| 21UR-96000 | 13.5  | 2.0  | 6.0   | 2.0  | 2.0  | 0.0 |
| 21UR-96010 | 0.0   | 0.0  | 0.0   | 0.0  | 0.0  | 0.0 |
| 21UR-96020 | 6.0   | 14.0 | 2.0   | 0.0  | 33.0 | 1.0 |
| 21UR-96030 | 0.0   | 0.0  | 0.0   | 0.0  | 0.0  | 0.0 |
| 21UR-96040 | 1.0   | 0.0  | 6.0   | 0.0  | 0.0  | 0.0 |
| 21UR-96050 | 20.0  | 7.7  | 11.0  | 4.0  | 2.0  | 0.0 |
| 21UR-96060 | 0.0   | 0.0  | 0.0   | 0.0  | 0.0  | 0.0 |
| 21UR-96070 | 0.0   | 0.0  | 0.0   | 0.0  | 0.0  | 0.0 |
| 21UR-96080 | 0.0   | 0.0  | 0.0   | 0.0  | 0.0  | 0.0 |
| 21UR-9610  | 0.0   | 0.0  | 4.0   | 0.0  | 0.0  | 0.0 |
| 21UR-96100 | 2.0   | 0.0  | 2.0   | 2.0  | 1.0  | 0.0 |
| 21UR-96110 | 4.0   | 2.0  | 4.0   | 0.0  | 3.0  | 0.0 |
| 21UR-96120 | 1.0   | 0.0  | 0.0   | 1.0  | 0.0  | 0.0 |
| 21UR-96130 | 0.0   | 0.0  | 0.0   | 0.0  | 0.0  | 0.0 |
| 21UR-96140 | 3.0   | 0.2  | 6.0   | 1.0  | 0.0  | 0.1 |
| 21UR-96150 | 0.0   | 1.0  | 0.0   | 1.0  | 0.0  | 0.0 |
| 21UR-96160 | 1.0   | 0.0  | 0.0   | 0.0  | 1.0  | 0.0 |
| 21UR-96170 | 47.0  | 34.0 | 47.0  | 22.0 | 15.0 | 6.0 |
| 21UR-96180 | 4.0   | 43.0 | 2.0   | 0.0  | 46.0 | 1.0 |
| 21UR-96190 | 0.0   | 0.0  | 0.0   | 0.0  | 0.0  | 0.0 |
| 21UR-96200 | 0.0   | 0.0  | 4.0   | 0.0  | 0.0  | 0.0 |
| 21UR-96210 | 0.0   | 4.0  | 0.0   | 0.0  | 0.0  | 1.0 |
| 21UR-96220 | 1.0   | 1.0  | 0.0   | 0.0  | 6.0  | 0.0 |

|            |       |      |       |      |      |      |
|------------|-------|------|-------|------|------|------|
| 21UR-96230 | 0.0   | 0.0  | 0.0   | 0.0  | 0.0  | 0.0  |
| 21UR-96240 | 0.0   | 0.5  | 0.0   | 0.0  | 0.0  | 0.0  |
| 21UR-96250 | 0.0   | 3.0  | 1.0   | 2.0  | 0.0  | 0.0  |
| 21UR-96260 | 0.0   | 0.0  | 0.0   | 0.0  | 0.0  | 0.0  |
| 21UR-96270 | 0.0   | 0.0  | 0.0   | 0.0  | 0.0  | 0.0  |
| 21UR-96280 | 0.0   | 0.0  | 0.0   | 0.0  | 0.0  | 0.0  |
| 21UR-96290 | 6.0   | 5.5  | 1.0   | 0.0  | 0.0  | 0.0  |
| 21UR-9630  | 0.0   | 0.0  | 0.0   | 0.0  | 0.0  | 0.0  |
| 21UR-96310 | 0.0   | 0.0  | 0.0   | 0.0  | 0.0  | 0.0  |
| 21UR-96320 | 0.0   | 0.0  | 0.0   | 0.0  | 0.0  | 0.0  |
| 21UR-96330 | 0.0   | 0.0  | 0.0   | 0.0  | 6.0  | 0.0  |
| 21UR-96340 | 0.0   | 0.0  | 2.0   | 0.0  | 0.0  | 0.0  |
| 21UR-96350 | 0.0   | 0.0  | 1.0   | 0.0  | 0.0  | 0.0  |
| 21UR-96360 | 0.0   | 0.0  | 0.0   | 0.0  | 0.0  | 0.0  |
| 21UR-96370 | 21.0  | 23.0 | 27.0  | 4.0  | 19.0 | 17.0 |
| 21UR-96380 | 0.0   | 1.0  | 0.0   | 0.0  | 0.0  | 0.0  |
| 21UR-96390 | 0.0   | 0.0  | 0.0   | 0.0  | 0.0  | 0.0  |
| 21UR-9640  | 0.0   | 0.0  | 0.0   | 0.0  | 0.0  | 0.0  |
| 21UR-96400 | 0.0   | 0.0  | 0.0   | 0.0  | 0.0  | 0.0  |
| 21UR-96410 | 0.0   | 0.0  | 0.0   | 0.0  | 0.0  | 0.0  |
| 21UR-96420 | 0.0   | 1.0  | 2.0   | 1.0  | 0.0  | 0.0  |
| 21UR-96430 | 0.0   | 0.0  | 0.0   | 0.0  | 0.0  | 0.0  |
| 21UR-96440 | 0.0   | 0.0  | 0.0   | 0.0  | 0.0  | 0.0  |
| 21UR-96460 | 0.0   | 0.0  | 0.0   | 0.0  | 0.0  | 0.0  |
| 21UR-96470 | 107.0 | 11.0 | 152.0 | 39.0 | 11.0 | 0.0  |
| 21UR-96480 | 0.0   | 0.0  | 0.0   | 0.0  | 0.0  | 0.0  |
| 21UR-96490 | 0.0   | 0.0  | 0.0   | 0.0  | 0.0  | 0.0  |
| 21UR-9650  | 6.0   | 4.0  | 6.0   | 0.0  | 2.0  | 0.0  |
| 21UR-96500 | 0.0   | 0.0  | 0.0   | 0.0  | 0.0  | 0.0  |
| 21UR-96510 | 0.0   | 0.0  | 1.0   | 0.0  | 0.0  | 0.0  |
| 21UR-96520 | 0.0   | 0.0  | 0.0   | 0.0  | 0.0  | 0.0  |
| 21UR-96530 | 0.0   | 0.0  | 0.0   | 0.0  | 0.0  | 0.0  |
| 21UR-96540 | 0.0   | 0.0  | 0.0   | 0.0  | 0.0  | 0.0  |
| 21UR-96550 | 0.0   | 0.1  | 0.0   | 0.0  | 0.0  | 0.0  |
| 21UR-96560 | 0.0   | 1.0  | 0.0   | 0.0  | 0.0  | 0.0  |
| 21UR-96570 | 0.0   | 0.0  | 0.0   | 0.0  | 0.0  | 0.0  |
| 21UR-96580 | 1.0   | 1.0  | 0.0   | 0.0  | 1.0  | 0.0  |
| 21UR-96590 | 0.0   | 0.0  | 0.0   | 0.0  | 1.0  | 0.0  |
| 21UR-9660  | 0.0   | 0.0  | 0.0   | 0.0  | 1.0  | 0.0  |
| 21UR-96600 | 0.0   | 0.0  | 1.0   | 0.0  | 1.0  | 0.0  |
| 21UR-96610 | 0.0   | 0.0  | 0.0   | 0.0  | 0.0  | 0.0  |
| 21UR-96620 | 0.0   | 0.0  | 0.0   | 0.0  | 0.0  | 0.0  |
| 21UR-96630 | 7.0   | 22.0 | 13.0  | 6.0  | 17.0 | 1.0  |
| 21UR-96640 | 1.0   | 8.0  | 1.0   | 0.0  | 2.0  | 2.0  |
| 21UR-96650 | 0.0   | 0.0  | 0.0   | 0.0  | 0.0  | 0.0  |
| 21UR-96660 | 3.0   | 0.0  | 2.0   | 0.0  | 4.0  | 0.0  |
| 21UR-96670 | 0.0   | 0.0  | 0.0   | 0.0  | 0.0  | 0.0  |
| 21UR-96680 | 0.0   | 0.0  | 0.0   | 0.0  | 0.0  | 0.0  |
| 21UR-96690 | 0.0   | 0.0  | 0.0   | 0.0  | 0.0  | 0.0  |
| 21UR-9670  | 0.0   | 0.0  | 1.0   | 0.0  | 0.0  | 0.0  |
| 21UR-96700 | 0.0   | 0.0  | 0.0   | 0.0  | 0.0  | 0.0  |

|            |       |      |      |      |       |      |
|------------|-------|------|------|------|-------|------|
| 21UR-96710 | 2.0   | 4.0  | 6.0  | 2.0  | 11.0  | 0.0  |
| 21UR-96720 | 0.0   | 0.0  | 0.0  | 0.0  | 0.0   | 0.0  |
| 21UR-96730 | 111.0 | 14.0 | 86.0 | 22.0 | 13.0  | 1.0  |
| 21UR-96740 | 0.0   | 1.0  | 0.0  | 0.0  | 0.0   | 0.0  |
| 21UR-96750 | 0.0   | 0.0  | 0.0  | 0.0  | 0.0   | 0.0  |
| 21UR-96760 | 0.0   | 0.0  | 0.0  | 0.0  | 3.0   | 0.0  |
| 21UR-96780 | 0.0   | 0.0  | 0.0  | 0.0  | 0.0   | 0.0  |
| 21UR-96790 | 3.0   | 0.0  | 4.0  | 0.0  | 2.0   | 0.0  |
| 21UR-9680  | 0.0   | 0.0  | 0.0  | 0.0  | 0.0   | 0.0  |
| 21UR-96800 | 5.0   | 0.0  | 3.0  | 1.0  | 6.0   | 0.0  |
| 21UR-96810 | 0.0   | 0.0  | 0.0  | 0.0  | 0.0   | 0.0  |
| 21UR-96820 | 4.0   | 0.0  | 1.0  | 1.0  | 0.0   | 0.0  |
| 21UR-96830 | 1.0   | 1.0  | 0.0  | 0.0  | 0.0   | 0.0  |
| 21UR-96840 | 0.0   | 0.0  | 0.0  | 0.0  | 0.0   | 0.0  |
| 21UR-96850 | 0.0   | 0.0  | 0.0  | 0.0  | 0.0   | 0.0  |
| 21UR-96860 | 1.0   | 0.0  | 0.0  | 0.0  | 0.0   | 0.0  |
| 21UR-96870 | 27.0  | 58.0 | 29.0 | 7.0  | 108.0 | 38.0 |
| 21UR-96880 | 0.0   | 0.0  | 0.0  | 0.0  | 1.0   | 0.0  |
| 21UR-96890 | 0.0   | 0.0  | 0.0  | 0.0  | 0.0   | 0.0  |
| 21UR-9690  | 4.0   | 0.0  | 1.0  | 4.0  | 1.5   | 0.0  |
| 21UR-96900 | 0.0   | 0.0  | 0.0  | 1.0  | 1.0   | 0.0  |
| 21UR-96910 | 0.0   | 0.0  | 1.0  | 0.0  | 0.0   | 0.0  |
| 21UR-96920 | 0.0   | 0.0  | 0.0  | 0.0  | 6.0   | 0.0  |
| 21UR-96930 | 0.0   | 0.0  | 1.0  | 0.0  | 6.0   | 0.0  |
| 21UR-96940 | 7.0   | 3.0  | 3.0  | 3.0  | 1.0   | 0.0  |
| 21UR-96950 | 0.0   | 0.0  | 4.0  | 0.0  | 0.0   | 0.0  |
| 21UR-96960 | 0.0   | 1.0  | 0.0  | 0.0  | 0.0   | 0.0  |
| 21UR-96970 | 0.0   | 0.0  | 1.0  | 0.0  | 0.0   | 0.0  |
| 21UR-96980 | 2.0   | 4.0  | 4.0  | 0.0  | 4.0   | 0.0  |
| 21UR-96990 | 0.0   | 0.0  | 0.0  | 0.0  | 0.0   | 0.0  |
| 21UR-970   | 0.0   | 2.0  | 1.0  | 0.0  | 1.0   | 0.0  |
| 21UR-9700  | 26.0  | 0.0  | 23.0 | 10.0 | 11.0  | 0.0  |
| 21UR-97000 | 0.0   | 0.0  | 0.0  | 0.0  | 0.0   | 0.0  |
| 21UR-97010 | 0.0   | 0.0  | 1.0  | 0.0  | 0.0   | 0.0  |
| 21UR-97020 | 0.0   | 0.0  | 0.0  | 0.0  | 0.0   | 0.0  |
| 21UR-97030 | 4.0   | 1.0  | 0.0  | 0.0  | 0.0   | 2.0  |
| 21UR-97050 | 0.0   | 0.0  | 2.0  | 0.0  | 1.0   | 0.0  |
| 21UR-97060 | 1.0   | 0.0  | 0.0  | 0.0  | 0.0   | 0.0  |
| 21UR-97070 | 1.0   | 2.0  | 4.0  | 0.0  | 0.0   | 0.0  |
| 21UR-97080 | 1.0   | 0.0  | 0.0  | 0.0  | 0.0   | 1.0  |
| 21UR-97090 | 0.0   | 1.0  | 4.0  | 1.0  | 10.0  | 0.0  |
| 21UR-9710  | 0.0   | 0.0  | 0.0  | 0.0  | 0.0   | 0.0  |
| 21UR-97100 | 0.0   | 0.0  | 0.0  | 0.0  | 0.0   | 0.0  |
| 21UR-97110 | 0.0   | 0.0  | 0.0  | 0.0  | 0.0   | 0.0  |
| 21UR-97120 | 0.0   | 0.0  | 0.0  | 0.0  | 0.0   | 0.0  |
| 21UR-97130 | 29.0  | 5.0  | 33.0 | 6.0  | 65.2  | 4.0  |
| 21UR-97140 | 0.0   | 1.0  | 4.0  | 0.0  | 0.0   | 0.0  |
| 21UR-97150 | 4.0   | 0.0  | 8.0  | 0.0  | 4.0   | 0.0  |
| 21UR-97160 | 0.0   | 0.0  | 0.0  | 0.0  | 0.0   | 0.0  |
| 21UR-97170 | 0.0   | 0.0  | 0.0  | 0.0  | 0.0   | 0.0  |
| 21UR-97180 | 0.0   | 0.0  | 0.0  | 0.0  | 0.0   | 0.0  |

|            |       |      |       |       |       |      |
|------------|-------|------|-------|-------|-------|------|
| 21UR-97190 | 0.0   | 0.0  | 1.0   | 1.0   | 5.0   | 0.0  |
| 21UR-9720  | 0.0   | 7.0  | 1.0   | 0.0   | 4.0   | 0.0  |
| 21UR-97200 | 1.0   | 0.0  | 1.0   | 0.0   | 0.0   | 0.0  |
| 21UR-97210 | 0.0   | 0.1  | 1.0   | 0.0   | 0.0   | 0.0  |
| 21UR-97220 | 0.0   | 0.0  | 0.0   | 0.0   | 0.0   | 0.0  |
| 21UR-97230 | 1.0   | 0.0  | 0.0   | 0.0   | 0.0   | 0.0  |
| 21UR-97250 | 0.0   | 0.0  | 0.0   | 0.0   | 0.0   | 0.0  |
| 21UR-97260 | 0.0   | 0.0  | 0.0   | 0.0   | 0.0   | 0.0  |
| 21UR-97270 | 0.0   | 4.0  | 0.0   | 0.0   | 4.0   | 1.0  |
| 21UR-97280 | 10.0  | 1.0  | 10.0  | 4.0   | 0.0   | 0.0  |
| 21UR-97290 | 1.0   | 1.2  | 0.0   | 0.0   | 0.0   | 0.5  |
| 21UR-9730  | 0.0   | 0.0  | 0.0   | 0.0   | 0.0   | 0.0  |
| 21UR-97300 | 0.0   | 0.0  | 0.0   | 0.0   | 0.0   | 0.0  |
| 21UR-97320 | 0.0   | 0.0  | 0.0   | 0.0   | 0.0   | 0.0  |
| 21UR-97330 | 10.0  | 8.0  | 8.0   | 4.0   | 10.0  | 0.0  |
| 21UR-97340 | 0.0   | 0.0  | 0.0   | 0.0   | 0.0   | 0.0  |
| 21UR-97350 | 0.0   | 0.0  | 0.0   | 0.0   | 0.0   | 0.0  |
| 21UR-97360 | 0.0   | 0.0  | 0.0   | 0.0   | 0.0   | 0.0  |
| 21UR-97370 | 0.0   | 0.0  | 1.0   | 0.0   | 0.0   | 0.0  |
| 21UR-97380 | 0.0   | 0.0  | 0.0   | 0.0   | 0.0   | 0.0  |
| 21UR-97390 | 0.0   | 0.0  | 0.0   | 0.0   | 0.0   | 0.0  |
| 21UR-9740  | 0.0   | 0.0  | 0.0   | 0.0   | 0.0   | 0.0  |
| 21UR-97400 | 0.0   | 0.0  | 0.0   | 0.0   | 0.0   | 0.0  |
| 21UR-97410 | 0.0   | 0.0  | 0.0   | 0.0   | 0.0   | 0.0  |
| 21UR-97420 | 0.0   | 0.0  | 0.0   | 0.0   | 0.0   | 0.0  |
| 21UR-97430 | 0.0   | 0.0  | 0.0   | 0.0   | 0.0   | 0.0  |
| 21UR-97440 | 0.0   | 0.0  | 0.0   | 0.0   | 1.0   | 0.0  |
| 21UR-97450 | 0.0   | 0.0  | 0.0   | 0.0   | 0.0   | 0.0  |
| 21UR-97460 | 0.0   | 0.0  | 0.0   | 0.0   | 0.0   | 0.0  |
| 21UR-97470 | 0.0   | 0.0  | 0.0   | 0.0   | 0.0   | 0.0  |
| 21UR-97480 | 8.0   | 0.0  | 14.0  | 0.0   | 5.0   | 0.0  |
| 21UR-97490 | 0.0   | 0.0  | 0.0   | 0.0   | 0.0   | 0.0  |
| 21UR-9750  | 27.0  | 3.0  | 21.0  | 10.0  | 4.0   | 0.0  |
| 21UR-97500 | 8.5   | 1.0  | 9.5   | 2.0   | 10.0  | 0.0  |
| 21UR-97510 | 0.0   | 0.0  | 0.0   | 0.0   | 0.0   | 0.0  |
| 21UR-97520 | 0.0   | 0.0  | 0.0   | 0.0   | 0.0   | 0.0  |
| 21UR-97530 | 0.0   | 0.0  | 0.0   | 0.0   | 0.0   | 0.0  |
| 21UR-97540 | 0.0   | 0.0  | 0.0   | 0.0   | 6.0   | 1.0  |
| 21UR-97550 | 3.0   | 1.0  | 2.0   | 1.0   | 1.0   | 0.0  |
| 21UR-97560 | 0.0   | 0.0  | 0.0   | 0.0   | 0.0   | 0.0  |
| 21UR-97570 | 107.0 | 63.0 | 129.0 | 178.0 | 252.0 | 37.0 |
| 21UR-97580 | 1.0   | 0.0  | 0.0   | 0.0   | 0.0   | 0.0  |
| 21UR-97590 | 3.0   | 2.0  | 2.0   | 1.0   | 0.0   | 0.0  |
| 21UR-9760  | 41.0  | 7.0  | 37.0  | 10.0  | 40.0  | 2.0  |
| 21UR-97600 | 0.0   | 0.0  | 0.0   | 0.0   | 0.0   | 0.0  |
| 21UR-97610 | 0.0   | 0.0  | 0.0   | 0.0   | 0.0   | 0.0  |
| 21UR-97620 | 0.0   | 0.0  | 0.0   | 0.0   | 0.0   | 0.0  |
| 21UR-97630 | 4.0   | 0.0  | 1.0   | 0.0   | 1.0   | 0.0  |
| 21UR-97640 | 0.0   | 0.0  | 0.0   | 0.0   | 0.0   | 0.0  |
| 21UR-97650 | 0.0   | 0.0  | 0.0   | 1.0   | 0.0   | 0.0  |
| 21UR-97660 | 2.0   | 17.0 | 7.0   | 3.0   | 46.0  | 6.0  |

|            |       |       |       |       |       |      |
|------------|-------|-------|-------|-------|-------|------|
| 21UR-97670 | 0.0   | 0.0   | 0.0   | 0.0   | 0.0   | 0.0  |
| 21UR-97680 | 2.0   | 11.0  | 4.0   | 1.0   | 14.0  | 1.0  |
| 21UR-97690 | 0.0   | 0.0   | 0.0   | 0.0   | 0.0   | 0.0  |
| 21UR-9770  | 0.0   | 2.5   | 5.0   | 0.0   | 1.5   | 0.5  |
| 21UR-97700 | 0.0   | 0.0   | 0.0   | 0.0   | 0.0   | 0.0  |
| 21UR-97730 | 0.0   | 1.0   | 1.0   | 0.0   | 1.0   | 1.0  |
| 21UR-97740 | 0.0   | 0.0   | 0.0   | 0.0   | 0.0   | 0.0  |
| 21UR-97750 | 1.0   | 0.0   | 1.0   | 0.0   | 0.0   | 0.0  |
| 21UR-97760 | 1.0   | 0.0   | 0.0   | 0.0   | 0.0   | 0.0  |
| 21UR-97770 | 0.0   | 0.0   | 0.0   | 0.0   | 0.0   | 0.0  |
| 21UR-97780 | 50.0  | 59.0  | 47.0  | 74.0  | 121.7 | 10.0 |
| 21UR-97790 | 836.5 | 268.0 | 924.7 | 343.0 | 216.0 | 23.0 |
| 21UR-97800 | 0.0   | 0.0   | 0.0   | 0.0   | 0.0   | 0.0  |
| 21UR-97810 | 2.0   | 0.0   | 3.0   | 0.0   | 0.0   | 0.0  |
| 21UR-97820 | 0.0   | 0.0   | 0.0   | 0.0   | 0.0   | 0.0  |
| 21UR-97830 | 0.0   | 0.0   | 0.0   | 0.0   | 0.0   | 0.0  |
| 21UR-97840 | 3.0   | 12.0  | 4.0   | 1.0   | 24.0  | 0.0  |
| 21UR-97850 | 0.0   | 2.0   | 0.0   | 0.0   | 1.0   | 0.0  |
| 21UR-97860 | 4.0   | 1.0   | 6.0   | 1.0   | 0.0   | 0.0  |
| 21UR-97870 | 0.0   | 0.0   | 0.0   | 0.0   | 0.0   | 0.0  |
| 21UR-97880 | 0.0   | 0.0   | 1.0   | 0.0   | 0.0   | 0.0  |
| 21UR-97890 | 8.0   | 1.0   | 1.0   | 1.0   | 0.0   | 0.0  |
| 21UR-9790  | 3.0   | 19.0  | 2.0   | 0.0   | 17.0  | 2.0  |
| 21UR-97900 | 0.0   | 6.0   | 4.0   | 0.0   | 0.0   | 0.0  |
| 21UR-97910 | 0.0   | 0.0   | 0.0   | 0.0   | 0.0   | 0.0  |
| 21UR-97920 | 0.0   | 0.0   | 0.0   | 0.0   | 0.0   | 0.0  |
| 21UR-97930 | 1.0   | 1.0   | 0.0   | 1.0   | 1.0   | 0.0  |
| 21UR-97940 | 0.0   | 0.0   | 0.0   | 0.0   | 1.0   | 0.0  |
| 21UR-97950 | 0.0   | 0.0   | 0.0   | 0.0   | 0.0   | 0.0  |
| 21UR-97960 | 18.0  | 11.0  | 15.0  | 4.5   | 8.0   | 0.0  |
| 21UR-97970 | 0.0   | 0.0   | 0.0   | 0.0   | 0.0   | 0.0  |
| 21UR-97980 | 9.0   | 7.0   | 11.0  | 2.0   | 2.0   | 3.0  |
| 21UR-97990 | 13.0  | 4.0   | 11.0  | 1.0   | 7.0   | 2.0  |
| 21UR-980   | 1.0   | 0.0   | 0.0   | 0.0   | 0.0   | 0.0  |
| 21UR-9800  | 0.0   | 0.0   | 0.0   | 0.0   | 0.0   | 0.0  |
| 21UR-98000 | 0.0   | 0.0   | 0.0   | 0.0   | 0.0   | 0.0  |
| 21UR-98010 | 0.0   | 1.0   | 3.0   | 0.0   | 0.0   | 0.0  |
| 21UR-98020 | 0.0   | 0.0   | 0.0   | 0.0   | 0.0   | 0.0  |
| 21UR-98030 | 0.0   | 0.0   | 0.0   | 0.0   | 0.0   | 0.0  |
| 21UR-98040 | 1.0   | 0.0   | 0.0   | 0.0   | 0.0   | 0.0  |
| 21UR-98050 | 2.0   | 0.0   | 1.0   | 0.0   | 0.0   | 0.0  |
| 21UR-98070 | 0.0   | 0.0   | 1.0   | 0.0   | 0.0   | 0.0  |
| 21UR-98080 | 0.0   | 0.0   | 0.0   | 0.0   | 0.0   | 0.0  |
| 21UR-98090 | 0.0   | 0.0   | 0.0   | 0.0   | 0.0   | 0.0  |
| 21UR-9810  | 38.0  | 3.0   | 28.0  | 6.0   | 3.0   | 0.0  |
| 21UR-98100 | 0.0   | 0.0   | 0.0   | 0.0   | 1.0   | 0.0  |
| 21UR-98110 | 44.0  | 52.0  | 38.0  | 12.0  | 55.5  | 8.0  |
| 21UR-98120 | 0.0   | 0.0   | 0.0   | 0.0   | 0.0   | 0.0  |
| 21UR-98130 | 0.0   | 0.0   | 0.0   | 0.0   | 0.0   | 0.0  |
| 21UR-98140 | 0.0   | 0.0   | 0.0   | 0.0   | 1.0   | 0.0  |
| 21UR-98150 | 0.0   | 0.0   | 0.0   | 0.0   | 0.0   | 0.0  |

|            |       |      |       |      |       |      |
|------------|-------|------|-------|------|-------|------|
| 21UR-98160 | 6.0   | 25.0 | 1.0   | 2.0  | 18.5  | 2.0  |
| 21UR-98170 | 7.0   | 1.0  | 7.0   | 1.0  | 3.0   | 0.0  |
| 21UR-98180 | 0.0   | 0.0  | 0.0   | 0.0  | 0.0   | 0.0  |
| 21UR-98190 | 0.0   | 0.0  | 0.0   | 0.0  | 1.0   | 0.0  |
| 21UR-9820  | 0.0   | 0.0  | 0.0   | 0.0  | 0.0   | 1.0  |
| 21UR-98200 | 0.0   | 0.0  | 0.0   | 0.0  | 0.0   | 0.0  |
| 21UR-98210 | 0.0   | 0.0  | 0.0   | 0.0  | 0.0   | 0.0  |
| 21UR-98230 | 0.0   | 2.0  | 0.0   | 31.0 | 138.0 | 8.0  |
| 21UR-98240 | 0.0   | 2.0  | 2.0   | 0.0  | 1.0   | 1.0  |
| 21UR-98250 | 3.0   | 1.0  | 8.0   | 4.0  | 4.1   | 0.0  |
| 21UR-98260 | 0.0   | 0.0  | 0.0   | 0.0  | 0.0   | 0.0  |
| 21UR-98270 | 43.0  | 24.0 | 53.0  | 17.0 | 21.0  | 1.0  |
| 21UR-98280 | 1.0   | 0.0  | 1.0   | 0.0  | 1.0   | 0.0  |
| 21UR-98290 | 0.0   | 0.0  | 0.0   | 0.0  | 0.0   | 0.0  |
| 21UR-9830  | 0.0   | 0.0  | 0.0   | 0.0  | 0.0   | 0.0  |
| 21UR-98300 | 6.0   | 3.0  | 4.0   | 3.0  | 5.0   | 0.0  |
| 21UR-98310 | 0.0   | 0.0  | 0.0   | 0.0  | 0.0   | 0.0  |
| 21UR-98320 | 12.0  | 2.0  | 6.0   | 2.0  | 2.0   | 0.0  |
| 21UR-98330 | 0.0   | 0.0  | 0.0   | 0.0  | 0.0   | 0.0  |
| 21UR-98340 | 124.0 | 21.0 | 101.0 | 30.0 | 7.0   | 4.0  |
| 21UR-98350 | 0.0   | 1.0  | 0.0   | 0.0  | 1.0   | 0.0  |
| 21UR-98360 | 0.0   | 0.0  | 0.0   | 0.0  | 0.0   | 0.0  |
| 21UR-98370 | 0.0   | 0.0  | 0.0   | 0.0  | 0.0   | 0.0  |
| 21UR-98380 | 0.0   | 0.0  | 0.0   | 0.0  | 0.0   | 0.0  |
| 21UR-98390 | 0.0   | 0.0  | 0.0   | 0.0  | 0.0   | 0.0  |
| 21UR-9840  | 5.0   | 0.0  | 4.0   | 0.0  | 4.0   | 0.0  |
| 21UR-98400 | 0.0   | 0.0  | 0.0   | 0.0  | 0.0   | 0.0  |
| 21UR-98410 | 0.0   | 0.0  | 0.0   | 0.0  | 0.0   | 0.0  |
| 21UR-98420 | 24.0  | 0.0  | 15.3  | 10.0 | 2.0   | 0.0  |
| 21UR-98430 | 1.0   | 4.0  | 2.0   | 2.0  | 0.0   | 0.0  |
| 21UR-98440 | 0.0   | 0.0  | 1.0   | 0.0  | 0.0   | 0.0  |
| 21UR-98450 | 0.0   | 0.0  | 0.0   | 0.0  | 0.0   | 0.0  |
| 21UR-98460 | 0.0   | 0.0  | 0.0   | 0.0  | 0.0   | 0.0  |
| 21UR-98470 | 0.0   | 0.0  | 0.0   | 0.0  | 0.0   | 0.0  |
| 21UR-98480 | 0.0   | 0.0  | 0.0   | 0.0  | 0.0   | 0.0  |
| 21UR-98490 | 0.0   | 0.0  | 0.0   | 0.0  | 0.0   | 0.0  |
| 21UR-9850  | 0.0   | 0.0  | 0.0   | 0.0  | 0.2   | 0.0  |
| 21UR-98500 | 1.0   | 1.0  | 0.0   | 0.0  | 0.0   | 0.0  |
| 21UR-98510 | 0.0   | 0.0  | 0.0   | 0.0  | 0.0   | 0.0  |
| 21UR-98520 | 0.0   | 0.0  | 0.0   | 0.0  | 0.0   | 0.0  |
| 21UR-98530 | 75.0  | 63.0 | 56.0  | 16.0 | 84.0  | 14.0 |
| 21UR-98540 | 0.0   | 0.0  | 0.0   | 0.0  | 0.0   | 0.0  |
| 21UR-98550 | 0.0   | 0.0  | 0.0   | 0.0  | 0.0   | 0.0  |
| 21UR-98560 | 0.0   | 0.0  | 0.0   | 0.0  | 1.0   | 0.0  |
| 21UR-98570 | 34.0  | 16.0 | 26.0  | 16.0 | 1.0   | 0.0  |
| 21UR-98580 | 0.0   | 0.0  | 0.0   | 0.0  | 0.0   | 0.0  |
| 21UR-98590 | 0.0   | 0.0  | 0.0   | 0.0  | 0.0   | 0.0  |
| 21UR-9860  | 26.0  | 1.1  | 10.0  | 1.0  | 7.0   | 0.0  |
| 21UR-98600 | 0.0   | 0.0  | 0.0   | 0.0  | 0.0   | 0.0  |
| 21UR-98610 | 0.0   | 0.0  | 1.0   | 0.0  | 0.0   | 0.0  |
| 21UR-98620 | 0.0   | 1.0  | 0.0   | 1.0  | 1.0   | 0.0  |

|            |      |       |      |      |      |     |
|------------|------|-------|------|------|------|-----|
| 21UR-98630 | 66.0 | 103.0 | 71.0 | 29.0 | 86.5 | 8.0 |
| 21UR-98640 | 0.0  | 0.0   | 0.0  | 0.0  | 0.0  | 0.0 |
| 21UR-98650 | 0.0  | 0.0   | 0.0  | 0.0  | 0.0  | 0.0 |
| 21UR-98660 | 0.0  | 0.0   | 0.0  | 0.0  | 0.0  | 0.0 |
| 21UR-98670 | 0.0  | 0.0   | 0.0  | 0.0  | 0.0  | 0.0 |
| 21UR-98680 | 6.0  | 9.0   | 9.0  | 4.0  | 8.0  | 1.0 |
| 21UR-98690 | 0.0  | 0.0   | 0.0  | 0.0  | 0.0  | 0.0 |
| 21UR-9870  | 0.0  | 0.0   | 2.0  | 0.0  | 0.0  | 0.0 |
| 21UR-98700 | 0.0  | 0.0   | 0.0  | 0.0  | 0.0  | 0.0 |
| 21UR-98710 | 0.0  | 0.0   | 0.0  | 0.0  | 0.0  | 0.0 |
| 21UR-98720 | 0.0  | 0.0   | 0.0  | 0.0  | 0.0  | 0.0 |
| 21UR-98730 | 0.0  | 0.0   | 0.0  | 0.0  | 0.0  | 0.0 |
| 21UR-98740 | 23.0 | 4.0   | 24.0 | 1.0  | 2.0  | 0.0 |
| 21UR-98750 | 60.5 | 4.0   | 45.0 | 6.0  | 20.0 | 0.0 |
| 21UR-98760 | 0.0  | 0.0   | 0.0  | 0.0  | 0.0  | 0.0 |
| 21UR-98770 | 0.0  | 0.0   | 0.0  | 0.0  | 0.0  | 0.0 |
| 21UR-98780 | 0.0  | 0.0   | 0.0  | 0.0  | 0.0  | 0.0 |
| 21UR-98790 | 0.0  | 0.0   | 0.0  | 0.0  | 0.0  | 0.0 |
| 21UR-9880  | 0.0  | 0.0   | 0.0  | 0.0  | 0.0  | 0.0 |
| 21UR-98800 | 0.0  | 3.0   | 0.0  | 0.0  | 0.0  | 0.0 |
| 21UR-98810 | 77.0 | 26.0  | 45.0 | 16.0 | 18.0 | 1.0 |
| 21UR-98820 | 0.0  | 0.0   | 0.0  | 0.0  | 0.0  | 0.0 |
| 21UR-98830 | 0.0  | 0.0   | 0.0  | 0.0  | 0.0  | 0.0 |
| 21UR-98840 | 0.0  | 0.0   | 0.0  | 0.0  | 0.0  | 0.0 |
| 21UR-98850 | 0.0  | 0.0   | 0.0  | 0.0  | 0.0  | 0.0 |
| 21UR-98860 | 0.0  | 0.0   | 0.0  | 0.0  | 0.0  | 0.0 |
| 21UR-98870 | 0.0  | 0.0   | 0.0  | 0.0  | 0.0  | 0.0 |
| 21UR-98880 | 0.0  | 0.0   | 0.0  | 0.0  | 0.0  | 0.0 |
| 21UR-98890 | 0.0  | 0.0   | 0.0  | 0.0  | 0.0  | 0.0 |
| 21UR-9890  | 0.0  | 0.0   | 0.0  | 0.0  | 0.0  | 0.0 |
| 21UR-98900 | 0.0  | 0.0   | 0.0  | 0.0  | 0.0  | 0.0 |
| 21UR-98910 | 0.0  | 1.0   | 0.0  | 0.0  | 0.0  | 0.0 |
| 21UR-98920 | 1.0  | 0.0   | 0.0  | 0.0  | 0.0  | 0.0 |
| 21UR-98930 | 0.0  | 0.0   | 0.0  | 0.0  | 0.0  | 0.0 |
| 21UR-98940 | 0.0  | 2.0   | 0.0  | 0.0  | 0.0  | 0.0 |
| 21UR-98950 | 0.0  | 0.0   | 0.0  | 0.0  | 0.0  | 0.0 |
| 21UR-98960 | 0.0  | 0.0   | 0.0  | 0.0  | 4.0  | 0.0 |
| 21UR-98970 | 0.0  | 0.0   | 0.0  | 0.0  | 0.0  | 0.0 |
| 21UR-98980 | 0.0  | 0.0   | 0.0  | 0.0  | 1.0  | 0.0 |
| 21UR-98990 | 2.0  | 0.0   | 2.0  | 1.0  | 3.0  | 0.0 |
| 21UR-990   | 0.0  | 4.0   | 0.0  | 0.0  | 6.0  | 0.0 |
| 21UR-9900  | 0.0  | 1.0   | 0.0  | 0.0  | 1.0  | 0.0 |
| 21UR-99000 | 0.0  | 0.0   | 0.0  | 0.0  | 0.0  | 0.0 |
| 21UR-99010 | 0.0  | 0.0   | 0.0  | 0.0  | 0.0  | 0.0 |
| 21UR-99020 | 0.0  | 0.0   | 0.0  | 0.0  | 0.0  | 0.0 |
| 21UR-99040 | 0.0  | 0.0   | 0.0  | 0.0  | 0.0  | 0.0 |
| 21UR-99050 | 0.0  | 0.0   | 0.0  | 0.0  | 0.0  | 0.0 |
| 21UR-99060 | 0.0  | 1.0   | 1.0  | 0.0  | 0.0  | 0.0 |
| 21UR-99070 | 0.0  | 0.0   | 0.0  | 0.0  | 0.0  | 0.0 |
| 21UR-99080 | 0.0  | 0.0   | 0.0  | 0.0  | 0.0  | 0.0 |
| 21UR-99090 | 0.0  | 2.0   | 5.0  | 0.0  | 5.0  | 0.0 |

|            |      |      |      |      |      |     |
|------------|------|------|------|------|------|-----|
| 21UR-9910  | 3.0  | 1.0  | 1.0  | 2.0  | 2.0  | 0.0 |
| 21UR-99100 | 0.0  | 0.0  | 0.0  | 0.0  | 0.0  | 0.0 |
| 21UR-99110 | 14.0 | 11.0 | 10.0 | 2.0  | 5.0  | 7.0 |
| 21UR-99120 | 1.0  | 0.0  | 2.0  | 0.0  | 1.0  | 0.0 |
| 21UR-99130 | 0.0  | 0.0  | 1.0  | 0.0  | 0.0  | 0.0 |
| 21UR-99140 | 1.0  | 1.0  | 1.0  | 0.0  | 0.0  | 0.0 |
| 21UR-99150 | 0.0  | 0.0  | 0.0  | 0.0  | 0.0  | 0.0 |
| 21UR-99160 | 0.0  | 0.0  | 1.0  | 0.0  | 0.0  | 0.0 |
| 21UR-99170 | 0.0  | 1.5  | 0.0  | 0.0  | 0.0  | 0.0 |
| 21UR-99180 | 1.0  | 0.0  | 5.0  | 1.0  | 0.0  | 0.0 |
| 21UR-99190 | 0.0  | 0.0  | 0.0  | 0.0  | 0.0  | 0.0 |
| 21UR-9920  | 15.0 | 17.0 | 10.0 | 10.0 | 30.0 | 0.0 |
| 21UR-99200 | 0.0  | 0.0  | 0.0  | 0.0  | 0.0  | 0.0 |
| 21UR-99210 | 0.0  | 0.0  | 1.0  | 0.0  | 0.0  | 0.0 |
| 21UR-99220 | 0.0  | 0.0  | 0.0  | 0.0  | 0.0  | 0.0 |
| 21UR-99230 | 0.0  | 0.0  | 0.0  | 0.0  | 1.0  | 0.0 |
| 21UR-99240 | 0.0  | 0.0  | 0.0  | 0.0  | 0.0  | 0.0 |
| 21UR-99250 | 0.0  | 0.0  | 1.0  | 0.0  | 0.0  | 0.0 |
| 21UR-99260 | 0.0  | 0.0  | 0.0  | 0.0  | 0.0  | 0.0 |
| 21UR-99270 | 1.0  | 0.0  | 0.0  | 0.0  | 0.0  | 0.0 |
| 21UR-99280 | 0.0  | 0.0  | 0.0  | 0.0  | 0.0  | 0.0 |
| 21UR-99290 | 0.0  | 0.0  | 0.0  | 0.0  | 0.0  | 0.0 |
| 21UR-9930  | 1.0  | 4.0  | 0.0  | 0.0  | 0.0  | 1.0 |
| 21UR-99300 | 0.0  | 0.0  | 0.0  | 0.0  | 1.0  | 0.0 |
| 21UR-99310 | 9.0  | 0.0  | 7.0  | 3.0  | 1.0  | 1.0 |
| 21UR-99320 | 12.0 | 0.0  | 8.0  | 4.0  | 8.0  | 0.0 |
| 21UR-99330 | 5.0  | 10.3 | 2.0  | 3.0  | 12.0 | 2.0 |
| 21UR-99340 | 0.0  | 0.0  | 0.0  | 0.0  | 0.0  | 0.0 |
| 21UR-99350 | 0.0  | 0.0  | 0.0  | 0.0  | 0.0  | 0.0 |
| 21UR-99360 | 4.0  | 0.0  | 0.0  | 0.0  | 0.0  | 0.0 |
| 21UR-99370 | 0.0  | 0.0  | 0.0  | 0.0  | 0.0  | 0.0 |
| 21UR-99380 | 0.0  | 0.0  | 0.0  | 0.0  | 0.0  | 0.0 |
| 21UR-99390 | 8.0  | 0.0  | 4.0  | 4.0  | 3.0  | 0.0 |
| 21UR-9940  | 4.0  | 1.0  | 6.0  | 0.0  | 0.0  | 1.0 |
| 21UR-99400 | 0.0  | 0.0  | 0.0  | 0.0  | 0.0  | 2.0 |
| 21UR-99410 | 0.0  | 0.0  | 0.0  | 0.0  | 0.0  | 0.0 |
| 21UR-99420 | 0.0  | 0.0  | 0.0  | 0.0  | 2.0  | 0.0 |
| 21UR-99430 | 0.0  | 0.0  | 0.0  | 0.0  | 0.0  | 0.0 |
| 21UR-99440 | 1.0  | 1.0  | 2.0  | 0.0  | 1.0  | 0.0 |
| 21UR-99450 | 0.0  | 0.0  | 0.0  | 0.0  | 0.0  | 0.0 |
| 21UR-99460 | 0.0  | 0.0  | 0.0  | 0.0  | 0.0  | 0.0 |
| 21UR-99480 | 1.0  | 1.0  | 3.0  | 0.0  | 0.0  | 0.0 |
| 21UR-9950  | 0.0  | 0.0  | 0.0  | 0.0  | 0.0  | 0.0 |
| 21UR-99510 | 0.0  | 0.0  | 0.0  | 0.0  | 0.0  | 1.0 |
| 21UR-99520 | 4.0  | 0.0  | 0.0  | 0.0  | 0.0  | 2.0 |
| 21UR-99530 | 0.0  | 0.0  | 1.0  | 0.0  | 0.0  | 0.0 |
| 21UR-99540 | 1.0  | 7.0  | 1.0  | 1.0  | 1.0  | 0.0 |
| 21UR-99550 | 0.0  | 0.0  | 0.0  | 0.0  | 0.0  | 0.0 |
| 21UR-99560 | 0.0  | 0.0  | 0.0  | 0.0  | 0.0  | 0.0 |
| 21UR-99570 | 0.0  | 1.0  | 0.0  | 0.0  | 0.0  | 0.0 |
| 21UR-99580 | 0.0  | 0.0  | 0.0  | 0.0  | 0.0  | 0.0 |



|            |      |       |      |      |      |      |
|------------|------|-------|------|------|------|------|
| 21UR-99590 | 8.0  | 1.0   | 4.0  | 0.0  | 1.0  | 1.0  |
| 21UR-9960  | 0.0  | 0.0   | 0.0  | 0.0  | 0.0  | 0.0  |
| 21UR-99600 | 0.0  | 0.0   | 0.0  | 0.0  | 0.0  | 0.0  |
| 21UR-99610 | 0.0  | 0.0   | 0.0  | 0.0  | 0.0  | 0.0  |
| 21UR-99620 | 0.0  | 0.0   | 0.0  | 0.0  | 0.0  | 0.0  |
| 21UR-99630 | 0.0  | 0.0   | 0.0  | 0.0  | 0.0  | 0.0  |
| 21UR-99640 | 0.0  | 0.0   | 0.0  | 1.0  | 0.0  | 0.0  |
| 21UR-99660 | 0.0  | 4.0   | 0.0  | 0.0  | 0.0  | 0.0  |
| 21UR-99670 | 0.0  | 0.0   | 0.0  | 0.0  | 0.0  | 0.0  |
| 21UR-99680 | 0.0  | 0.0   | 0.0  | 1.0  | 1.0  | 0.0  |
| 21UR-99690 | 0.0  | 0.0   | 0.0  | 0.0  | 0.0  | 0.0  |
| 21UR-9970  | 18.5 | 7.0   | 10.0 | 4.0  | 0.0  | 2.0  |
| 21UR-99700 | 0.0  | 13.0  | 0.0  | 0.0  | 0.0  | 0.0  |
| 21UR-99710 | 43.0 | 144.0 | 28.0 | 25.0 | 96.0 | 39.0 |
| 21UR-99720 | 0.0  | 0.0   | 0.0  | 0.0  | 0.0  | 0.0  |
| 21UR-99730 | 0.0  | 0.0   | 0.0  | 0.0  | 0.0  | 0.0  |
| 21UR-99740 | 3.0  | 2.0   | 5.0  | 1.0  | 1.0  | 0.0  |
| 21UR-99750 | 0.0  | 0.0   | 0.0  | 0.0  | 0.0  | 0.0  |
| 21UR-99760 | 0.0  | 0.0   | 0.0  | 0.0  | 0.0  | 0.0  |
| 21UR-99770 | 0.0  | 0.0   | 0.0  | 0.0  | 0.0  | 0.0  |
| 21UR-99780 | 0.0  | 0.0   | 0.0  | 0.0  | 0.0  | 0.0  |
| 21UR-99790 | 0.0  | 1.0   | 0.0  | 0.0  | 0.0  | 0.0  |
| 21UR-9980  | 37.0 | 11.0  | 31.0 | 8.0  | 9.0  | 6.0  |
| 21UR-99800 | 1.0  | 0.0   | 7.0  | 0.0  | 0.0  | 0.0  |
| 21UR-99810 | 3.0  | 1.0   | 1.0  | 0.0  | 1.0  | 0.0  |
| 21UR-99820 | 0.0  | 0.0   | 0.0  | 0.0  | 0.0  | 0.0  |
| 21UR-99830 | 4.0  | 0.0   | 0.0  | 1.0  | 0.0  | 0.0  |
| 21UR-99840 | 0.0  | 0.0   | 11.0 | 8.0  | 4.0  | 0.0  |
| 21UR-99850 | 0.0  | 0.0   | 0.0  | 0.0  | 0.0  | 0.0  |
| 21UR-99860 | 0.0  | 0.0   | 0.0  | 0.0  | 0.0  | 0.0  |
| 21UR-99870 | 1.0  | 0.0   | 0.0  | 0.0  | 0.0  | 0.0  |
| 21UR-99880 | 6.0  | 4.0   | 3.0  | 2.0  | 2.0  | 0.0  |
| 21UR-99890 | 0.0  | 0.0   | 0.0  | 0.0  | 0.0  | 0.0  |
| 21UR-9990  | 14.0 | 12.0  | 8.0  | 6.0  | 14.0 | 4.0  |
| 21UR-99910 | 11.0 | 35.0  | 12.0 | 2.0  | 31.0 | 3.0  |
| 21UR-99920 | 2.0  | 0.0   | 0.0  | 0.0  | 0.0  | 0.0  |
| 21UR-99930 | 0.0  | 0.2   | 0.0  | 0.0  | 0.0  | 0.0  |
| 21UR-99940 | 2.0  | 2.0   | 0.0  | 0.0  | 2.0  | 0.0  |
| 21UR-99950 | 1.0  | 0.0   | 0.0  | 0.0  | 0.0  | 0.0  |
| 21UR-99960 | 0.0  | 0.0   | 0.0  | 0.0  | 0.0  | 0.0  |
| 21UR-99970 | 0.0  | 0.0   | 0.0  | 0.0  | 0.0  | 0.0  |
| 21UR-99980 | 0.0  | 0.0   | 0.0  | 0.0  | 0.0  | 0.0  |
| 21UR-99990 | 12.0 | 0.0   | 13.0 | 4.0  | 6.0  | 0.0  |

**Supplementary Table 8.** qRT-PCR results 16 miRNAs on hand-picked one-cell stage embryos.

We used TaqMan miRNA assays to independently validate the miRNA expression of 16 miRNAs observed in the deep sequencing on hand-picked living one-cell stage embryos.

**miRNA qRT-PCR (TaqMan) Results (CT)**

|       |            | rep1  | rep2  | rep3  |
|-------|------------|-------|-------|-------|
| 1cell | cel-miR-35 | 24.57 | 24.97 | 24.98 |
| 1cell | cel-miR-36 | 24.69 | 24.89 | 24.96 |
| 1cell | cel-miR-37 | 25.29 | 25.95 | 25.94 |
| 1cell | cel-miR-38 | 29.71 | 29.83 | 29.96 |
| 1cell | cel-miR-39 | 25.97 | 25.83 | 25.99 |
| 1cell | cel-miR-40 | 25.82 | 25.89 | 25.99 |
| 1cell | cel-miR-42 | 30.91 | 30.98 | 30.89 |
| 1cell | cel-miR-44 | 31.79 | 31.82 | 31.98 |
| 1cell | cel-miR-48 | 33.79 | 33.97 | 34.18 |
| 1cell | cel-miR-58 | 31.96 | 31.97 | 31.94 |
| 1cell | cel-miR-61 | 37.02 | 36.21 | 35.71 |
| 1cell | cel-miR-71 | 32.74 | 32.60 | 32.97 |
| 1cell | cel-miR-72 | 29.81 | 29.85 | 29.96 |
| 1cell | cel-miR-73 | 30.90 | 30.79 | 30.99 |
| 1cell | cel-miR-81 | 33.55 | 34.44 | 33.97 |
| 1cell | cel-lin-4  | 34.77 | 37.03 | 34.67 |
| 1cell | U18        | 28.95 | 29.08 | 29.18 |
| 1cell | sn2343     | 28.84 | 28.96 | 28.95 |

**Supplementary Table 9.** List of primers and probes used in this study.

**26G-RNA probes:**

26G-I: 5'-AGG GAG AAC TTC TTC TGC CGC GAA GC

26G-II: 5'-AAC GCC ATG TTA AAA AAT TCT CTC GC

26G-III: 5'-ATA CCA GAT TGT CCT TCA CGA TAG TC

26G-IV: 5'-TGT CTT TCC ACT CTT TGT TCC TCT AC

26G-V: 5'-TAT CTT CTA ACT CAA ACC TTA CAT CC

**RT-PCR Primers:**

oma-1\_F: CGG TGA AAA CAA CGA GAA GAT CG

oma-1\_R: CGG TGA AAA CAA CGA GAA GAT CG

oma-2\_F: GGA GTC GAA GAC ATG TGC TTT C

oma-2\_R: GCT GTA GAA CGA CCT CCA TTC A

med-1\_F: CCT ACC CTT ACC CCG TTT TCA ATG C

med-1\_R: GGT AGA TGG AGA TGT AGA TGG AGT GG

end-1\_F: GGC TCC AGT TCA ATA TGG TGG TGG

end-1\_R: GGA TTG GAG CAG ACA GAG TTC GTG

act-1\_F: GTC GGT ATG GGA CAG AAG GA

act-1\_R: GCT TCA GTG AGG AGG ACT GG
